# Supplementary material
Source: PubMed Central journal article supplement (PMC6893993)
Supplement: Supplemental_Material2.pdf [file Supplemental_Material2.pdf]

### All the genes that were considered as expressed in intestinal PCs of Cgd patients and disease controls sorted in the order of most abundant genes to least abundant genes. Values are log values given out by DESeq2, which is equivalent to log2 scale, but normalized by library sizes. Thus the values are comparable between samples/libraries.

| Gene    | DiseaseControlPcs_51 | DiseaseControlPcs_52 | DiseaseControlPcs_53 | DiseaseControlPcs_54 | CeD_Non_TG2_S1 | CeD_Non_TG2_S2 | CeD_Non_TG2_S3 | CeD_Non_TG2_S4 | CeD_Non_TG2_S5 | CeD_Non_TG2_S6 | CeD_Non_TG2_S7 | CeD_TG2_S1  | CeD_TG2_S2  | CeD_TG2_S3  | CeD_TG2_S4  | CeD_TG2_S5  | CeD_TG2_S6  | CeD_TG2_S7  |             |
|---------|----------------------|----------------------|----------------------|----------------------|----------------|----------------|----------------|----------------|----------------|----------------|----------------|-------------|-------------|-------------|-------------|-------------|-------------|-------------|-------------|
| B2M     | 17.57386111          | 17.55243905          | 17.55576752          | 17.40488137          | 17.83926465    | 18.00411475    | 17.90146784    | 17.58264087    | 16.93782372    | 17.25196655    | 17.64616975    | 17.91427185 | 17.98171268 | 17.87140539 | 16.58085969 | 17.21222519 | 17.10440883 | 17.13099134 |             |
| UBC     | 17.50597127          | 17.70421949          | 17.50379678          | 17.44523393          | 17.53436678    | 17.48431263    | 17.63471548    | 17.41302851    | 16.9392086     | 17.67120668    | 16.80041904    | 17.31882817 | 17.43899108 | 17.12914865 | 17.27877438 | 17.80837502 | 16.64049879 | 17.23711959 |             |
| TNPO3   | 17.56870719          | 17.41059444          | 17.34859778          | 17.42003939          | 17.44179928    | 17.24632374    | 17.23154241    | 17.07354751    | 17.56438849    | 17.56438849    | 17.43799239    | 17.25471928 | 16.82820397 | 17.0137745  | 16.86464094 | 17.2731122  | 16.96338008 | 17.2731122  |             |
| HERPUD1 | 17.15725156          | 17.34019766          | 17.05204882          | 17.05204882          | 17.34019766    | 17.24671778    | 17.39704213    | 17.20622229    | 16.58957261    | 16.97301046    | 16.58957261    | 17.4343743  | 17.42746332 | 17.16549270 | 16.80377865 | 17.00208684 | 16.67075343 | 16.78076167 |             |
| CS2CD3  | 16.93595975          | 17.17718983          | 17.12500845          | 17.48194341          | 17.02440097    | 17.30542172    | 17.2812875     | 16.03514084    | 17.1888665     | 16.73995352    | 16.86039571    | 17.0105752  | 17.41823702 | 17.51875439 | 16.35102314 | 17.18393316 | 16.8802516  | 16.8290174  |             |
| EEF1A1  | 16.7325308           | 16.68698676          | 16.89055925          | 16.81773611          | 17.6388163     | 16.60884101    | 16.53685394    | 16.53685394    | 16.21928881    | 16.25142453    | 17.19655008    | 16.60962568 | 16.33208337 | 16.20320348 | 16.98976647 | 16.83371001 | 16.16014317 | 16.47745526 |             |
| MT-CYB  | 16.0373460           | 16.46789065          | 16.19386152          | 16.45730966          | 16.59485821    | 16.39787745    | 16.40805257    | 16.81162064    | 16.45456996    | 16.67919362    | 16.16217356    | 16.5832802  | 16.16868129 | 16.16899584 | 16.63444288 | 16.95369034 | 17.25400599 | 16.6598312  |             |
| DUSP1   | 16.84797685          | 16.80979125          | 16.60769064          | 16.80979125          | 16.54742068    | 16.26995889    | 16.38519159    | 16.26995889    | 16.0508617     | 16.27832012    | 16.95852289    | 16.22432447 | 16.38157888 | 16.43204374 | 16.54816126 | 16.45652283 | 16.10314538 | 16.5993378  |             |
| HPAS2   | 16.38218272          | 16.4398555           | 16.12127744          | 16.4398555           | 16.38576476    | 16.21590229    | 16.20899753    | 15.4888326     | 16.10143294    | 16.59945936    | 16.15607168    | 16.5462687  | 16.2932697  | 16.37739584 | 16.00245479 | 16.2027663  | 16.6348766  | 16.18877651 |             |
| HPM5    | 15.82993532          | 16.18619929          | 16.07548221          | 16.07478948          | 16.23212559    | 16.38242944    | 16.84130293    | 16.75468741    | 16.25478818    | 16.11590963    | 16.11551893    | 16.24784647 | 16.30099705 | 16.64767817 | 16.92139571 | 16.51524556 | 16.2306252  | 15.92596346 |             |
| MT-CO2  | 15.78117815          | 16.15375942          | 16.02484821          | 16.02484821          | 16.15375942    | 16.14188655    | 16.14809871    | 16.18584677    | 16.15343194    | 15.38478001    | 16.31945493    | 16.21251071 | 16.43294734 | 16.17683926 | 16.63751279 | 16.88616124 |             |             |             |
| HPSPH81 | 16.01805767          | 16.01682732          | 16.01682732          | 16.1743105           | 16.19006707    | 16.32718091    | 16.57678469    | 15.70958275    | 15.95109187    | 16.75462523    | 16.28183953    | 16.11755351 | 16.40792224 | 16.9227979  | 16.7667483  | 16.10806577 | 16.1520693  | 16.0816134  |             |
| RGS1    | 15.76247229          | 16.29256894          | 16.01939452          | 16.01939452          | 16.0394452     | 16.50820447    | 16.05696349    | 16.05696349    | 16.0102246     | 15.5989787     | 15.72344775    | 16.14931306 | 16.6834141  | 16.35197503 | 15.53011271 | 16.2788555  | 16.30494512 | 15.5269817  |             |
| MZB1    | 15.94705643          | 16.22437372          | 16.50379254          | 15.8273393           | 16.14844892    | 16.49257368    | 16.23826023    | 15.55476486    | 16.85842034    | 15.75774805    | 16.89429349    | 16.85092884 | 16.26865762 | 16.9962825  | 15.8102749  | 16.45466337 | 15.31189226 | 15.96788504 |             |
| FTL     | 15.96768504          | 16.33178568          | 16.14693865          | 16.14693865          | 16.7807075     | 16.05418372    | 15.88102128    | 15.88102128    | 15.46842919    | 15.77317465    | 15.77317465    | 16.0784262  | 16.0784262  | 15.80437742 | 15.73107482 | 15.48026405 | 15.93937724 | 15.93937724 |             |
| SSR4    | 15.97678141          | 16.1128149           | 16.1436528           | 15.77350496          | 16.99319479    | 16.19945058    | 16.14006399    | 15.46041897    | 15.71544143    | 16.15370367    | 15.82074418    | 16.5246761  | 16.04425471 | 16.08404417 | 15.22316618 | 15.39691974 | 15.56214455 | 15.4349971  |             |
| RFC5    | 16.0307683           | 16.29713417          | 16.15523375          | 16.12677842          | 16.05080893    | 15.55478075    | 15.98794939    | 15.65234909    | 16.05080893    | 15.65234909    | 15.93264471    | 16.82325782 | 15.13572141 | 17.3751852  | 15.5047331  | 15.80980006 | 15.7984907  | 15.92395198 |             |
| MT-CO3  | 15.4268113           | 15.76125944          | 15.80022262          | 15.79611197          | 15.48010889    | 15.79635605    | 15.61655651    | 15.97784274    | 15.97784274    | 16.08924301    | 15.19897548    | 16.09550975 | 15.49963043 | 15.30346654 | 15.82551271 | 15.91000214 | 16.50261631 | 16.25588783 |             |
| NR3A1   | 15.84677889          | 15.90524115          | 15.77272989          | 15.50043628          | 16.56042873    | 15.87060306    | 15.54219599    | 15.54219599    | 15.54219599    | 15.54219599    | 15.54219599    | 15.54219599 | 15.54219599 | 15.54219599 | 15.54219599 | 15.54219599 | 15.54219599 | 15.54219599 | 15.54219599 |
| JUN     | 16.45708962          | 16.34571418          | 16.19112992          | 16.34571418          | 16.19112992    | 16.19112992    | 16.19112992    | 16.19112992    | 16.19112992    | 16.19112992    | 16.19112992    | 16.19112992 | 16.19112992 | 16.19112992 | 16.19112992 | 16.19112992 | 16.19112992 | 16.19112992 | 16.19112992 |
| MT-ND5  | 14.98604136          | 16.68816458          | 15.57061882          | 15.9892849           | 15.07811533    | 15.71303608    | 15.76871902    | 16.1285559     | 15.51607225    | 16.26807262    | 15.40764484    | 15.79202037 | 15.68443867 | 16.81693392 | 16.38884966 | 16.21977443 | 16.96004451 | 16.2804493  |             |
| RPL3    | 15.93891164          | 16.14947487          | 15.88621778          | 15.90355158          | 15.67670799    | 15.65682158    | 15.65682158    | 15.65682158    | 15.65682158    | 15.65682158    | 15.67118224    | 15.71484402 | 15.64802684 | 16.68743972 | 16.8205418  | 15.93519501 | 15.01263553 | 15.13304889 |             |
| H3FB    | 15.67699945          | 15.65923804          | 16.05036217          | 15.92249593          | 15.65659497    | 16.13031837    | 15.51461121    | 16.93188353    | 15.54205511    | 14.99640263    | 15.75994002    | 16.61664992 | 16.28747569 | 16.668922   | 15.14220451 | 15.35215728 | 15.09428789 | 15.97004191 |             |
| MT-ND4  | 15.2873029           | 15.40111604          | 15.45242615          | 15.42631826          | 15.07509704    | 16.5292622     | 15.29824601    | 16.44196296    | 15.39908004    | 15.39908004    | 15.58981358    | 15.74035708 | 15.41594255 | 16.25690202 | 16.25872062 | 16.5676442  | 16.20728626 | 16.5676442  |             |
| MC1R    | 14.75867257          | 15.06629793          | 15.04120163          | 15.2800326           | 15.14557144    | 15.38671622    | 15.43766456    | 15.56592965    | 16.07747565    | 15.69964719    | 15.93638579    | 14.95731153 | 15.34617123 | 15.35188811 | 16.06394898 | 16.21516438 | 16.63677034 | 15.73796787 |             |
| KLFB    | 15.4355793           | 15.08597923          | 15.12909491          | 15.70393158          | 15.84051134    | 15.84051134    | 15.84051134    | 15.84051134    | 15.84051134    | 15.84051134    | 15.84051134    | 15.84051134 | 15.84051134 | 15.84051134 | 15.84051134 | 15.84051134 | 15.84051134 | 15.84051134 | 15.84051134 |
| KLFA    | 15.18932037          | 15.48597793          | 15.42597933          | 15.116538            | 15.42597933    | 15.42597933    | 15.42597933    | 15.42597933    | 15.42597933    | 15.42597933    | 15.42597933    | 15.42597933 | 15.42597933 | 15.42597933 | 15.42597933 | 15.42597933 | 15.42597933 | 15.42597933 | 15.42597933 |
| MT-CO1  | 14.65853774          | 15.43858372          | 14.86265774          | 16.04065799          | 15.94551199    | 15.49841589    | 15.48961368    | 17.2676576     | 15.17124431    | 15.9460144     | 14.87986698    | 16.37538989 | 15.14362877 | 16.46880502 | 17.11208234 | 15.47829739 | 16.18390576 | 16.79794717 |             |
| HUA-B   | 14.44871711          | 15.05253732          | 15.38245653          | 15.75537738          | 15.75537738    | 15.75537738    | 15.75537738    | 15.75537738    | 15.75537738    | 15.75537738    | 16.10554496    | 15.34128828 | 15.37924967 | 15.82061821 | 14.81214605 | 15.48694505 | 15.4153784  | 15.48694505 |             |
| YPL5    | 15.05109815          | 15.23547123          | 15.06104376          | 15.46261636          | 15.16868041    | 15.75371632    | 15.55525254    | 14.72148883    | 15.58937922    | 15.24352992    | 15.79713665    | 15.17626833 | 15.65113573 | 16.66694493 | 14.73865505 | 15.62027908 | 15.4821966  | 15.54273631 |             |
| MT-ATP6 | 14.90386638          | 15.12628714          | 15.05005705          | 15.0772194           | 16.3183474     | 15.48110898    | 15.19511282    | 15.9061392     | 15.0691376     | 15.37644743    | 14.96390767    | 15.57161461 | 15.2684746  | 15.32816296 | 15.99958761 | 15.70002102 | 16.00488278 | 15.99958761 |             |
| TRIB1   | 14.89515813          | 15.21804648          | 14.9992465           | 15.06605977          | 14.97478212    | 15.04651138    | 15.46136571    | 15.25063464    | 15.48263882    | 15.00313413    | 15.62377283    | 15.29093963 | 15.04483637 | 15.31410328 | 15.58248991 | 15.83906326 | 15.25714747 | 16.00479646 |             |
| NR1H5A  | 14.81212694          | 15.14653809          | 14.86918874          | 15.08408987          | 14.28049898    | 15.07538319    | 15.0323252     | 15.42710075    | 16.06904328    | 15.63951478    | 15.63951478    | 15.63951478 | 15.63951478 | 15.63951478 | 15.63951478 | 15.63951478 | 15.63951478 | 15.63951478 | 15.63951478 |
| DNX5    | 15.08719362          | 15.08719362          | 15.08719362          | 15.08719362          | 15.08719362    | 15.08719362    | 15.08719362    | 15.08719362    | 15.08719362    | 15.08719362    | 15.08719362    | 15.08719362 | 15.08719362 | 15.08719362 | 15.08719362 | 15.08719362 | 15.08719362 | 15.08719362 | 15.08719362 |
| HUA-C   | 15.50832808          | 14.88146967          | 13.40305143          | 15.17540665          | 15.64932253    | 15.10436455    | 15.43839386    | 14.84822456    | 15.4701423     | 16.5635387     | 14.05008778    | 15.41651429 | 14.93282189 | 15.31876882 | 14.61915177 | 14.78007761 | 16.41293252 | 13.68928292 |             |
| MT-ND2  | 14.564377            | 14.8462254           | 14.76740887          | 14.76740887          | 14.76740887    | 15.10617036    | 15.08668637    | 17.71294058    | 15.62457083    | 15.07340064    | 14.86624423    | 14.7171166  | 14.81070283 | 16.62004208 | 15.56781716 | 16.16679001 | 15.61168523 | 15.61168523 |             |
| JUNB    | 15.1657280           | 15.25403434          | 15.10246705          | 15.0340415           | 15.06470502    | 15.06631895    | 15.26452129    | 14.14649495    | 15.47846321    | 14.76460393    | 14.61252117    | 14.89770464 | 15.52003489 | 15.31631441 | 14.17397263 | 15.00709757 | 14.7772395  | 14.77748547 |             |
| IER2    | 15.6870007           | 15.69257459          | 15.0010985           | 1                    |                |                |                |                |                |                |                |             |             |             |             |             |             |             |             |



|          |             |              |             |             |             |             |             |             |             |             |             |             |             |             |             |             |             |             |
|----------|-------------|--------------|-------------|-------------|-------------|-------------|-------------|-------------|-------------|-------------|-------------|-------------|-------------|-------------|-------------|-------------|-------------|-------------|
| EI4G2    | 12.6942592  | 12.77561728  | 13.10110369 | 12.90384251 | 13.05787456 | 12.80760816 | 12.98520251 | 13.09617422 | 13.08601381 | 12.96892718 | 13.13985159 | 12.72820706 | 12.45345567 | 12.80690349 | 13.18253643 | 13.07434073 | 12.78852096 | 12.9668873  |
| TP31N1P1 | 11.7296594  | 12.25637962  | 12.48663246 | 12.63751095 | 12.64700806 | 12.82190764 | 12.86194387 | 13.17452484 | 13.30569346 | 13.14205474 | 12.20842802 | 12.78156075 | 12.79015114 | 13.22169843 | 13.9280693  | 13.78742689 | 13.50125357 | 13.06868838 |
| RP525    | 12.97706552 | 12.95465931  | 13.01866081 | 12.95462988 | 12.99589808 | 13.06203428 | 12.94905453 | 12.41825417 | 12.51252566 | 12.46521159 | 12.98717304 | 13.00303291 | 12.66701384 | 12.44873591 | 12.5089231  | 12.69867567 | 12.97898983 | 12.47329627 |
| PUPP5    | 13.1254089  | 13.12477641  | 12.93872053 | 13.01172435 | 12.95786849 | 13.10202351 | 12.84504171 | 12.77484582 | 12.74413669 | 12.71167589 | 13.18518601 | 13.04408232 | 13.3642133  | 13.1654994  | 12.94969759 | 12.78402942 | 12.62097821 | 12.91976627 |
| HPM1     | 13.27559944 | 13.27559944  | 13.27559944 | 13.27559944 | 13.27559944 | 13.27559944 | 13.27559944 | 13.27559944 | 13.27559944 | 13.27559944 | 13.27559944 | 13.27559944 | 13.27559944 | 13.27559944 | 13.27559944 | 13.27559944 | 13.27559944 | 13.27559944 |
| CRELD2   | 13.18572882 | 12.468282    | 13.93280892 | 13.03785253 | 13.03785253 | 13.03785253 | 13.03785253 | 13.03785253 | 13.03785253 | 13.03785253 | 12.79154116 | 12.72756299 | 13.45903221 | 12.9699951  | 12.54808151 | 12.61206214 | 12.70530492 | 12.70530492 |
| ATPSA1   | 12.53829043 | 13.07054758  | 13.0744881  | 12.85863652 | 13.04313107 | 13.0701588  | 13.07561281 | 12.5398553  | 12.9598871  | 12.54642447 | 13.19787116 | 13.0607088  | 12.91017422 | 12.4376886  | 12.486535   | 12.74630885 | 12.46441035 | 13.0160577  |
| TM584X   | 12.68228924 | 12.89800047  | 13.01693824 | 13.09507593 | 13.12313318 | 13.79306497 | 12.6466274  | 12.46204947 | 12.53530929 | 12.48298369 | 13.12759204 | 13.06004895 | 13.73235476 | 12.5818141  | 12.32338702 | 12.56152048 | 12.95787943 | 13.2334289  |
| TAGLN2   | 12.14825255 | 12.8596725   | 12.78836158 | 12.74942407 | 12.52075662 | 13.81541916 | 12.64534106 | 13.08602826 | 13.27442791 | 12.63342831 | 13.76556339 | 12.52002788 | 13.74624731 | 12.45298582 | 13.07366353 | 13.31974775 | 12.99114909 | 13.18389757 |
| CD79A    | 12.90847891 | 13.3622428   | 12.9256433  | 12.69870398 | 13.03176913 | 13.56568442 | 13.24195167 | 12.81601054 | 12.65372936 | 12.65372936 | 12.9703689  | 12.97942632 | 13.80814935 | 13.55188808 | 12.95684471 | 12.79911705 | 12.79911705 | 12.47338896 |
| RP17A    | 12.90212587 | 13.37302658  | 13.04043077 | 13.01554546 | 12.90428602 | 13.15107834 | 12.90755548 | 12.30824384 | 12.9570149  | 13.0023139  | 12.96549572 | 12.9727803  | 13.07392594 | 12.60659999 | 12.26610322 | 12.60560769 | 12.32926688 | 12.6058617  |
| ELI2     | 13.97821982 | 12.19910377  | 12.18008982 | 12.15604151 | 12.01215737 | 12.41754956 | 12.94145116 | 14.04091334 | 12.84559738 | 13.09276613 | 14.08603746 | 11.86171962 | 12.97804824 | 12.91911029 | 13.99087649 | 13.11852675 | 12.87266728 | 13.82823857 |
| RP524    | 13.04817923 | 13.10735884  | 13.01835279 | 12.913054   | 12.913054   | 12.913054   | 12.913054   | 12.913054   | 12.913054   | 12.913054   | 12.58348582 | 13.41000452 | 12.86069434 | 12.63584704 | 12.5634505  | 11.92079374 | 12.72047472 | 12.6586651  |
| AHNAK    | 10.76165511 | 13.3942014   | 10.89987251 | 11.5682165  | 11.365103   | 13.1889327  | 10.8519632  | 12.98414656 | 12.20408872 | 12.91709952 | 12.40726387 | 11.15597591 | 13.8850686  | 11.20611458 | 13.01856941 | 13.35415432 | 12.83416636 | 13.3208952  |
| SERF2    | 12.95348968 | 12.87978207  | 12.2561194  | 12.7741879  | 12.7077111  | 13.1314157  | 12.6142408  | 12.43836021 | 12.43836021 | 12.43836021 | 12.66992648 | 13.17715652 | 13.15516393 | 12.87919691 | 12.2974007  | 12.49158404 | 12.57491136 | 12.86041516 |
| RPL17    | 12.86457114 | 13.00964701  | 12.99196376 | 13.00031232 | 12.92033366 | 12.83790088 | 12.88918352 | 12.70253639 | 13.36930225 | 12.46983221 | 14.7185678  | 12.85305787 | 12.3664533  | 12.3963892  | 12.04823692 | 12.93363035 | 12.89227264 | 12.49991826 |
| WARS     | 12.41498473 | 12.28044526  | 12.28912373 | 12.88191222 | 12.99377309 | 13.12115147 | 12.77449445 | 12.69961911 | 13.05922824 | 13.00956419 | 13.03895132 | 12.78709712 | 12.86964475 | 12.846961   | 13.09448918 | 12.29125965 | 12.88083721 | 13.3464195  |
| SEC62    | 12.88210973 | 12.40718157  | 13.13353072 | 12.8246375  | 13.0361807  | 13.29303862 | 13.08606319 | 12.47289492 | 12.47127939 | 12.71700676 | 12.651613   | 13.50257435 | 13.40405109 | 12.67915901 | 12.51599123 | 12.68245359 | 12.63244244 | 12.62298521 |
| CD27     | 13.08873679 | 13.44435413  | 13.14199721 | 13.33956651 | 13.45421722 | 13.7281462  | 12.9535525  | 12.81514845 | 13.19025868 | 12.76556853 | 12.89692781 | 12.56149627 | 12.68110944 | 12.47237455 | 11.83502929 | 12.63972852 | 11.75270728 | 12.63882724 |
| EF1B2    | 13.17434472 | 13.41618559  | 13.17434472 | 13.08357586 | 13.07484893 | 13.0017589  | 12.89444368 | 12.49226653 | 12.12826266 | 12.56510285 | 13.21422717 | 12.01203295 | 12.52190902 | 12.53039432 | 12.07380515 | 12.77241893 | 12.53050588 | 12.41432112 |
| SSR2     | 13.17055688 | 13.25200012  | 13.1247319  | 12.94001381 | 12.94001381 | 12.82407457 | 12.68206867 | 12.59154165 | 12.45298404 | 12.53858451 | 12.81376704 | 12.91578497 | 12.93195145 | 12.7103161  | 12.20313752 | 12.67224832 | 12.39014484 | 12.32884313 |
| RP515    | 13.09908553 | 13.23967047  | 13.23194714 | 13.02986652 | 13.0646843  | 12.87956647 | 12.17816405 | 12.94109023 | 12.17816405 | 12.94109023 | 12.75943668 | 13.03917478 | 12.72242841 | 12.7152175  | 12.5577766  | 12.51963688 | 12.24408851 | 12.25626926 |
| TNFR5F17 | 13.25925991 | 13.19066786  | 13.2139045  | 13.02444236 | 13.22180734 | 13.1534765  | 12.88208586 | 12.18594935 | 12.70861765 | 12.32336469 | 12.77132375 | 13.02531929 | 12.90529695 | 13.40029272 | 13.71556991 | 12.24967979 | 12.0565479  | 12.2588754  |
| SRF3     | 13.18398503 | 12.98811829  | 13.42372815 | 12.75198527 | 12.7919714  | 13.09997404 | 12.5979706  | 12.63538432 | 12.05068115 | 12.54270744 | 12.59566467 | 12.90752181 | 13.30064657 | 12.85384359 | 12.95819881 | 12.79898101 | 12.5943832  | 12.5818676  |
| RPL7A    | 13.20696596 | 13.28156884  | 13.29661235 | 12.71061617 | 12.90623827 | 13.03691441 | 12.61659621 | 13.1746113  | 12.34532232 | 13.26053831 | 12.86650311 | 12.47456525 | 12.36164466 | 12.04983244 | 12.66710553 | 12.36926562 | 12.32887729 | 12.32887729 |
| TAGAP    | 12.4628774  | 12.29374938  | 11.86776451 | 12.68222638 | 12.78962827 | 13.2237923  | 12.46558258 | 12.95614784 | 12.95614784 | 12.95614784 | 13.01295448 | 12.7167596  | 13.04374716 | 12.91811783 | 12.03286572 | 12.12717668 | 12.68668272 | 12.68668272 |
| MYAD0    | 12.45459325 | 12.3062682   | 12.7743989  | 12.89163969 | 12.30911166 | 13.46553979 | 12.55261695 | 12.45436311 | 13.35782448 | 12.88178777 | 13.38511272 | 13.18938287 | 13.08042066 | 12.4744645  | 12.6506662  | 13.40495323 | 13.04127186 | 12.45894616 |
| CPD1     | 12.82872315 | 12.82872315  | 12.82872315 | 12.82872315 | 12.82872315 | 12.82872315 | 12.82872315 | 12.82872315 | 12.82872315 | 12.82872315 | 12.82872315 | 12.82872315 | 12.82872315 | 12.82872315 | 12.82872315 | 12.82872315 | 12.82872315 | 12.82872315 |
| MYADM    | 12.83682163 | 12.80671605  | 12.86771157 | 12.80671605 | 12.86771157 | 12.80671605 | 12.86771157 | 12.80671605 | 12.86771157 | 12.80671605 | 12.86771157 | 12.80671605 | 12.86771157 | 12.80671605 | 12.86771157 | 12.80671605 | 12.86771157 | 12.80671605 |
| RP55     | 13.06298544 | 13.19076428  | 13.29556665 | 12.86901981 | 12.7877856  | 12.9453307  | 12.80633855 | 12.25685632 | 12.83336518 | 12.08425745 | 12.8664398  | 12.81844821 | 12.56564343 | 12.42277439 | 11.73474783 | 12.42729355 | 12.2080183  | 13.4515786  |
| CS38A10  | 12.68350607 | 12.34579047  | 12.92924604 | 12.68350607 | 12.34579047 | 12.92924604 | 12.68350607 | 12.34579047 | 12.92924604 | 12.68350607 | 12.34579047 | 12.92924604 | 12.68350607 | 12.34579047 | 12.92924604 | 12.68350607 | 12.34579047 | 12.92924604 |
| RAB30    | 10.97336193 | 11.88126213  | 11.96033601 | 12.15206391 | 12.12231851 | 12.77057474 | 12.91788991 | 13.35929751 | 12.76923963 | 12.91772141 | 13.14903979 | 12.57739067 | 13.18701998 | 13.37255778 | 13.81305894 | 13.47152464 | 13.44447392 | 13.7452525  |
| BTG1     | 12.77477292 | 12.811325127 | 12.8009552  | 12.8246375  | 12.62716327 | 12.85837812 | 12.84413022 | 12.83433865 | 13.38893188 | 12.47784241 | 12.53563217 | 12.68767182 | 12.75598088 | 12.66492126 | 13.15351478 | 12.84801333 | 12.76808895 | 12.76808895 |
| RP58     | 12.94155933 | 13.04217857  | 13.12214671 | 12.96015208 | 12.85936411 | 12.79435445 | 12.640799   | 12.56217405 | 13.33040603 | 12.4366355  | 13.21746642 | 12.64517853 | 12.53093731 | 12.15004753 | 12.00146548 | 12.88959264 | 12.73601649 | 12.47154388 |
| DNAI1    | 12.56878953 | 12.56878953  | 12.56878953 | 12.56878953 | 12.56878953 | 12.56878953 | 12.56878953 | 12.56878953 | 12.56878953 | 12.56878953 | 12.56878953 | 12.56878953 | 12.56878953 | 12.56878953 | 12.56878953 | 12.56878953 | 12.56878953 | 12.56878953 |
| LMAN1    | 12.56878953 | 12.56878953  | 12.56878953 | 12.56878953 | 12.56878953 | 12.56878953 | 12.56878953 | 12.56878953 | 12.56878953 | 12.56878953 | 12.56878953 | 12.56878953 | 12.56878953 | 12.56878953 | 12.56878953 | 12.56878953 | 12.56878953 | 12.56878953 |
| CTYP     | 12.21554348 | 12.6457896   | 12.34636683 | 12.5640299  | 12.6027057  | 13.04593283 | 12.71952042 | 12.72129909 | 12.8776291  | 12.6350454  | 13.13557282 | 12.49755739 | 13.09624445 | 12.73763705 | 12.82629443 | 13.05150397 | 12.9865642  | 12.8506177  |
| JTB      | 12.75082963 | 12.92351799  | 12.98119122 | 12.68584761 | 12.99519773 | 12.97752704 | 12.9881451  | 12.30587213 | 12.30587213 | 12.30587213 | 13.1642555  | 13.02475288 | 12.87343477 | 12.91048815 | 12.06365089 | 12.12540096 | 12.23460511 | 12.83779759 |
| OST4     | 12.76615756 | 12.98871302  | 12.99196376 | 12.69936447 | 12.89532827 | 13.04191553 | 12.75232902 | 12.2408027  | 12.5776259  | 12.2023277  | 12.54239614 | 12.8049249  | 12.98349434 | 12.73336991 | 12.17711503 | 12.4620682  | 12.19495651 | 12.32776261 |
| CS3A2    | 13.04555349 | 12.97638386  | 12.97638386 | 12.96407957 | 12.79638386 | 12.79638386 | 12.79638386 | 12.79638386 | 12.79638386 | 12.79638386 | 12.79638386 | 12.79638386 | 12.79638386 | 12.79638386 | 12.79638386 | 12.79638386 | 12.79638386 | 12.79638386 |
| PABPC1   | 13.03428233 | 12.7836733   | 13.00171971 | 12.13621465 | 12.62035818 | 12.89475124 | 12.7147811  | 13.01211937 | 12.5685294  | 12.5685294  | 12.20017331 | 12.49356356 | 12.69442439 | 12.78240205 | 12.358193   | 12.63858252 | 12.62049657 | 12.23620768 |
| EAR2     | 12.95462163 | 12.70370644  | 12.7613532  | 12.80944783 | 12.71462088 | 12.7017011  | 12.6735820  |             |             |             |             |             |             |             |             |             |             |             |



|         |             |             |             |             |             |             |             |             |             |             |             |             |             |             |             |             |              |             |
|---------|-------------|-------------|-------------|-------------|-------------|-------------|-------------|-------------|-------------|-------------|-------------|-------------|-------------|-------------|-------------|-------------|--------------|-------------|
| SRP72   | 11.89653089 | 11.82824525 | 11.90126615 | 11.60562401 | 12.2441055  | 12.18677063 | 11.90876664 | 11.93146684 | 12.09530113 | 12.12347359 | 12.11212316 | 12.16845853 | 12.23245915 | 11.72219346 | 12.06217988 | 12.41047983 | 12.2018453   | 11.90842327 |
| GUK1    | 11.97757867 | 12.29443872 | 12.35291314 | 12.2506107  | 12.3561031  | 12.44134009 | 12.15745545 | 11.88189109 | 11.93668899 | 11.8648946  | 11.92646554 | 12.53422009 | 12.74395016 | 12.30400978 | 11.79435116 | 11.75384809 | 11.96153702  | 11.99161598 |
| ICAM3   | 12.1795372  | 12.2356651  | 11.95907874 | 12.0666511  | 12.056232   | 12.26600188 | 12.24512417 | 11.85805107 | 12.23568379 | 11.97425861 | 11.91498904 | 11.93062255 | 12.33218106 | 12.07514848 | 11.61386116 | 11.76595952 | 11.85166287  | 11.95047756 |
| HSPAL3  | 12.08317515 | 11.34496667 | 11.75504455 | 12.25813851 | 11.95354054 | 12.18557448 | 11.33958127 | 11.91501998 | 12.24498846 | 11.75021338 | 12.40551433 | 12.20533622 | 12.40456256 | 12.35432414 | 12.04480878 | 12.19239386 | 11.67593732  | 12.00224853 |
| RP26    | 12.36556544 | 12.45571598 | 12.45671701 | 12.37800834 | 12.45717111 | 12.65174701 | 12.06770394 | 11.51910176 | 11.46809704 | 11.46809704 | 12.46540636 | 12.43514318 | 11.90786569 | 11.64430007 | 11.98466627 | 11.68301078 | 11.65798624  | 11.03540260 |
| ATP11   | 12.3084623  | 12.35857009 | 12.66157027 | 12.38657851 | 12.35648327 | 12.24603489 | 12.26454959 | 12.35482337 | 12.36517451 | 11.82367153 | 12.22711263 | 12.05546663 | 11.52999998 | 11.79280663 | 11.04486875 | 11.79280663 | 11.52600733  | 12.222206   |
| RP15    | 12.0014633  | 12.20079807 | 12.21294144 | 12.24151022 | 12.19357559 | 12.37664842 | 12.11149711 | 11.58913187 | 12.18744104 | 11.52397121 | 12.33992427 | 12.98703111 | 12.13644318 | 11.60430215 | 11.07799066 | 11.80529487 | 11.7632811   | 12.01582858 |
| COX4I1  | 12.03151855 | 12.26034034 | 12.16538481 | 12.16780591 | 12.39668777 | 12.22737128 | 12.11577861 | 11.65673333 | 12.04417799 | 11.52254606 | 12.074542   | 11.82951767 | 12.04673241 | 12.12975788 | 11.41662238 | 11.64666971 | 11.42271757  | 11.61461949 |
| BSG     | 12.3800923  | 12.12868004 | 12.3542606  | 11.87558604 | 12.5093732  | 12.57480012 | 12.45418436 | 11.77020116 | 12.06014384 | 11.86931431 | 12.03189141 | 12.21357049 | 12.45064808 | 12.03770784 | 11.7216875  | 11.87513741 | 11.90001065  | 11.96609626 |
| MEF2C   | 12.521246   | 12.71471969 | 12.24183678 | 12.5231296  | 12.5977463  | 12.19112947 | 11.8511551  | 11.68495296 | 12.0956230  | 12.21813011 | 12.33547815 | 11.97927491 | 11.78735956 | 11.77220593 | 11.84916548 | 11.34961588 | 11.74909378  | 11.74909378 |
| RP32    | 12.42226825 | 12.66114413 | 12.64480254 | 12.61147516 | 12.31011412 | 12.08995706 | 11.99686818 | 12.52074832 | 11.59617884 | 11.59617884 | 12.41201623 | 12.19771355 | 11.83171118 | 11.7564892  | 11.12983505 | 11.99325299 | 11.64723849  | 11.86186826 |
| COX6A1  | 12.5396661  | 12.34291646 | 12.11957298 | 12.04354294 | 12.2985815  | 12.51909219 | 12.15252629 | 11.619068   | 11.90900074 | 11.57689504 | 12.01936957 | 12.02437008 | 12.07013283 | 12.02847876 | 11.73259029 | 11.63486259 | 11.52386435  | 12.61895613 |
| PN1     | 11.96770717 | 12.19002462 | 11.89187485 | 12.11277265 | 12.1277265  | 12.63704327 | 12.25896368 | 11.52732468 | 11.8453997  | 12.25015018 | 12.65575787 | 12.615007   | 11.80079138 | 11.78730098 | 11.7554791  | 12.66698782 |              |             |
| RRB4    | 11.66229033 | 12.26853056 | 12.10277912 | 11.89418538 | 12.25391928 | 12.52892666 | 11.96146461 | 11.68066841 | 12.12235029 | 11.7681148  | 11.95033417 | 12.55171687 | 12.30200489 | 12.27686886 | 11.63626892 | 12.16625286 | 11.78231166  | 11.70565758 |
| SNR9A   | 11.99049386 | 12.42968688 | 12.19610332 | 12.06981268 | 12.11910327 | 12.52374804 | 12.20720745 | 11.9737369  | 12.6989822  | 11.73378524 | 12.48593268 | 11.61100418 | 12.33986457 | 11.72313635 | 12.1568111  | 12.392975   | 11.4863701   | 11.9416487  |
| BM11    | 12.14287474 | 12.09447467 | 12.28371028 | 11.27763528 | 12.33845761 | 11.68751962 | 12.38650818 | 11.98550536 | 12.0816965  | 11.8220515  | 11.88837304 | 12.37959631 | 11.68587288 | 12.54969447 | 11.91902682 | 12.07199181 | 11.8004806   | 11.34629722 |
| RP24    | 12.1036705  | 12.58189423 | 12.42067874 | 12.35935152 | 12.33076118 | 12.25795832 | 12.03413515 | 12.19351755 | 12.12962429 | 11.97310149 | 12.01957657 | 12.12726627 | 11.80237642 | 11.53734194 | 10.83325129 | 11.7361434  | 11.5376973   | 11.61681267 |
| TM9F3   | 11.97294967 | 11.39791712 | 11.51584506 | 12.0252556  | 12.892265   | 11.6153723  | 11.64624156 | 12.0465263  | 12.34431416 | 12.36522928 | 12.35652229 | 12.6750819  | 11.70102274 | 11.73628022 | 12.38073045 | 12.47500781 | 11.98306209  | 12.2631657  |
| SEC1A1  | 11.6364477  | 11.18178419 | 12.01937429 | 12.03815297 | 12.01937429 | 11.93160023 | 12.1204761  | 11.84404233 | 12.08908275 | 12.35352098 | 12.3192927  | 11.66051368 | 12.16761993 | 12.52578996 | 11.9288866  | 11.97333051 | 11.98306209  | 11.96898813 |
| GALTSR  | 12.0364677  | 12.30131081 | 12.52420028 | 12.12170298 | 12.03112797 | 11.90480095 | 11.9218333  | 12.0745763  | 12.35844659 | 11.67340833 | 12.13047683 | 12.07949641 | 11.83015755 | 12.09482219 | 12.04600333 | 11.45935367 | 11.45935367  | 11.55798624 |
| ARC2    | 11.81932951 | 12.01938832 | 11.64958873 | 12.16660637 | 12.14823854 | 12.12985668 | 12.18608476 | 12.01613969 | 11.81959733 | 11.7056098  | 11.98489497 | 12.17764329 | 12.18083402 | 12.51360657 | 11.92917041 | 11.6071431  | 11.5376973   | 12.12795036 |
| CLM1    | 12.04242143 | 12.14763372 | 12.31084623 | 11.85196299 | 11.96589494 | 12.57915171 | 12.02367093 | 12.16436557 | 11.89563002 | 11.9651951  | 12.07302943 | 11.97098582 | 12.01104884 | 11.9926313  | 12.0417335  | 11.90031217 | 11.6071431   | 12.53664156 |
| ENO1    | 12.05151299 | 12.56860658 | 12.05702801 | 12.29952678 | 12.2281944  | 12.20832306 | 11.9800895  | 11.57057529 | 11.93123325 | 11.54017647 | 11.96354463 | 12.03335581 | 12.32192698 | 11.95369875 | 11.99234094 | 11.9868461  | 11.53735289  | 12.1282447  |
| UFM1    | 12.93324674 | 12.10399632 | 12.16216222 | 12.15348024 | 12.03474637 | 11.9525883  | 11.84882937 | 11.95572801 | 11.78031984 | 11.80313864 | 12.33166648 | 12.009466   | 11.9788671  | 12.26271853 | 12.03639703 | 11.83120028 | 11.617286035 | 12.11286035 |
| CO164   | 12.83700356 | 12.10832942 | 12.10832942 | 12.23050349 | 11.93422241 | 12.33989767 | 12.33901273 | 12.86968397 | 12.16401124 | 12.00045675 | 12.35204799 | 11.91198794 | 12.30267512 | 12.0190141  | 11.82869104 | 11.96554943 | 11.35454762  | 12.20001248 |
| EPRS    | 11.99341957 | 12.1139245  | 11.83010458 | 12.24637459 | 11.89962233 | 11.95125942 | 11.79319674 | 11.63959972 | 12.10337598 | 12.00357214 | 12.03864601 | 12.01304032 | 12.13892197 | 11.69648594 | 12.06531208 | 12.21002266 | 12.24514902  | 12.2402413  |
| RNASE2  | 12.17427403 | 12.36485708 | 12.79711511 | 12.20710425 | 12.258554   | 11.58959951 | 12.07498263 | 11.49957469 | 12.0785998  | 11.93975668 | 11.62837943 | 12.27174082 | 11.82336679 | 12.24642489 | 11.37126903 | 11.61745089 | 11.78462886  | 11.0257604  |
| SNR9B   | 11.9343995  | 11.81027795 | 11.50898511 | 11.84027795 | 11.50898511 | 11.50898511 | 11.84027795 | 11.50898511 | 11.84027795 | 11.50898511 | 11.84027795 | 11.50898511 | 11.84027795 | 11.50898511 | 11.84027795 | 11.50898511 | 11.84027795  | 11.50898511 |
| CTSS    | 11.88672206 | 12.35749274 | 12.14844025 | 12.1171318  | 12.14844025 | 12.49305242 | 12.21375347 | 12.21375347 | 12.21375347 | 12.21375347 | 12.21375347 | 12.21375347 | 12.21375347 | 12.21375347 | 12.21375347 | 12.21375347 | 12.21375347  | 12.21375347 |
| SLC25A5 | 11.69731938 | 12.18610795 | 12.05667646 | 11.83801795 | 12.01938885 | 12.19105861 | 11.9957111  | 11.85379212 | 11.74251414 | 11.38512571 | 11.97913014 | 12.18262525 | 12.05017178 | 12.00500945 | 11.80297489 | 11.38469886 | 11.21407817  | 12.03667275 |
| ADIPOR1 | 12.23894063 | 11.82510455 | 12.23894063 | 12.23894063 | 12.23894063 | 12.23894063 | 12.23894063 | 12.23894063 | 12.23894063 | 12.23894063 | 12.23894063 | 12.23894063 | 12.23894063 | 12.23894063 | 12.23894063 | 12.23894063 | 12.23894063  | 12.23894063 |
| Coorf62 | 12.44550238 | 12.51740052 | 12.557399   | 12.06176126 | 12.42581812 | 12.14717164 | 11.90292877 | 11.38419742 | 11.80191479 | 11.63946366 | 11.48645608 | 12.63989262 | 12.16732637 | 12.60773891 | 11.69776167 | 12.47415358 | 11.55532127  | 12.16193853 |
| POCD4   | 12.16645365 | 12.41174918 | 12.16645365 | 12.16645365 | 12.16645365 | 12.16645365 | 12.16645365 | 12.16645365 | 12.16645365 | 12.16645365 | 12.16645365 | 12.16645365 | 12.16645365 | 12.16645365 | 12.16645365 | 12.16645365 | 12.16645365  | 12.16645365 |
| PRDX1   | 11.75695078 | 12.26204996 | 12.14712453 | 11.85450644 | 12.08651035 | 12.46411467 | 12.04389277 | 12.06424209 | 12.09795498 | 11.79609542 | 12.01389642 | 12.0385785  | 12.32835004 | 11.73311169 | 12.17206352 | 11.8645023  | 11.88316765  | 11.49378333 |
| SARS    | 11.9749395  | 11.7167722  | 11.7167722  | 11.9749395  | 12.29522385 | 12.38650519 | 12.1651377  | 12.2620989  | 11.57357392 | 12.04604724 | 11.92476481 | 12.02390267 | 12.28436259 | 11.63807359 | 11.92629666 | 11.5380179  | 11.5380179   | 11.62869624 |
| INSIG1  | 11.49317866 | 11.01452883 | 12.01452883 | 11.01452883 | 12.01452883 | 12.01452883 | 12.01452883 | 12.01452883 | 12.01452883 | 12.01452883 | 12.01452883 | 12.01452883 | 12.01452883 | 12.01452883 | 12.01452883 | 12.01452883 | 12.01452883  | 12.01452883 |
| YWHAE   | 12.03031448 | 12.02873595 | 12.0100725  | 11.91587496 | 12.22784161 | 12.39134843 | 12.26928628 | 11.59228654 | 12.12035538 | 11.74696222 | 11.88466631 | 12.15206618 | 11.81741612 | 12.44346992 | 11.44072993 | 11.76141031 | 11.68980792  | 12.7038403  |
| CLK1    | 11.83367349 | 11.37649126 | 11.9107587  | 11.9107587  | 11.43351586 | 12.06208558 | 12.59563638 | 11.77449715 | 11.87107089 | 12.15307177 | 11.82748701 | 12.17206547 | 12.60664128 | 12.03159916 | 12.19603197 | 12.19603197 | 12.19603197  | 12.19603197 |
| CKAP4   | 12.18645188 | 11.97173218 | 12.38025948 | 12.09660089 | 12.05468739 | 11.65963159 | 11.25905518 | 12.22407627 | 11.79042246 | 11.91618704 | 11.82133546 | 11.91291533 | 11.49927675 | 12.08943319 | 12.41991304 | 11.96865603 | 12.09954266  | 12.14616597 |
| ANKRD37 | 12.38580843 | 12.12069738 | 12.12069738 | 12.12069738 | 12.12069738 | 12.12069738 | 12.12069738 | 12.12069738 | 12.12069738 | 12.12069738 | 12.12069738 | 12.12069738 | 12.12069738 | 12.12069738 | 12.12069738 | 12.12069738 | 12.12069738  | 12.12069738 |
| SFBP3   | 12.05604359 | 11.09462819 | 12.05604359 | 11.09462819 | 12.05604359 | 11.09462819 | 12.05604359 | 11.09462819 | 12.05604359 | 11.09462819 | 12.05604359 | 11.09462819 | 12.05604359 | 11.09462819 | 12.05604359 | 11.09462819 | 12.05604359  | 11.09462819 |
| UFM2    | 11.43962458 | 11.57917995 | 11.81055482 | 11.73796612 | 11.73796612 | 11.81055482 | 11.73796612 | 1           |             |             |             |             |             |             |             |             |              |             |

|            |             |              |             |             |             |             |               |             |             |             |              |             |             |             |             |              |             |              |
|------------|-------------|--------------|-------------|-------------|-------------|-------------|---------------|-------------|-------------|-------------|--------------|-------------|-------------|-------------|-------------|--------------|-------------|--------------|
| SD04       | 12.0630525  | 12.123254032 | 11.89127046 | 11.88493337 | 12.30747482 | 12.25212582 | 11.84404833   | 11.63789445 | 11.81639274 | 11.47620218 | 11.71943358  | 12.20328822 | 12.54874721 | 11.46603622 | 11.56719393 | 11.62566575  | 11.31696974 | 11.34903021  |
| MAGED1     | 11.92234697 | 12.06590341  | 12.17640373 | 11.58971461 | 11.88449961 | 11.26071244 | 11.88546597   | 11.48349508 | 11.44643414 | 11.42639794 | 11.77405524  | 12.25010766 | 11.97854941 | 11.91950683 | 11.59836011 | 11.52974705  | 11.56327446 | 12.00434138  |
| GIG1       | 11.57162960 | 11.7232674   | 11.80523544 | 11.00413669 | 11.79349986 | 11.42549998 | 11.83743778   | 11.26391957 | 12.01726916 | 12.07873743 | 12.19336654  | 11.43445509 | 11.75536965 | 11.45594625 | 12.43210924 | 12.13091445  | 12.08902365 | 11.5729936   |
| PSMB6      | 11.78110999 | 12.02556366  | 12.13280629 | 11.73280629 | 12.13280629 | 11.85726926 | 12.13280629   | 11.44005568 | 11.38203303 | 11.28142599 | 11.384742    | 12.03054728 | 12.53723028 | 11.94088999 | 11.34215004 | 11.36445106  | 11.18284073 | 11.67415325  |
| MAT3       | 11.7831327  | 11.7831327   | 11.7831327  | 11.7831327  | 11.7831327  | 11.7831327  | 11.7831327    | 11.7831327  | 11.7831327  | 11.7831327  | 11.7831327   | 11.7831327  | 11.7831327  | 11.7831327  | 11.7831327  | 11.7831327   | 11.7831327  | 11.7831327   |
| ARHG0D     | 11.80460119 | 12.04667993  | 12.04667993 | 12.04667993 | 12.04667993 | 12.04667993 | 12.04667993   | 12.04667993 | 12.04667993 | 12.04667993 | 12.04667993  | 12.04667993 | 12.04667993 | 12.04667993 | 12.04667993 | 12.04667993  | 12.04667993 | 12.04667993  |
| BRD2       | 12.07921078 | 11.56041917  | 11.33046596 | 11.4494065  | 11.45028031 | 11.60329829 | 11.89240522   | 12.20393172 | 11.93851022 | 11.80788308 | 11.84196616  | 11.14126634 | 11.91671578 | 11.72481372 | 12.21292652 | 11.98602988  | 11.95932411 | 11.53217411  |
| TORG1      | 11.63020627 | 11.87361831  | 11.40025433 | 11.86274374 | 11.97575823 | 11.43003897 | 11.52580023   | 11.96081554 | 11.57147716 | 11.25552966 | 11.53647412  | 11.77738486 | 11.31329722 | 11.68175786 | 12.13943945 | 11.82583816  | 12.3270648  | 11.95749125  |
| ECH1       | 11.88215167 | 12.28305384  | 12.19948476 | 11.96833499 | 11.83970866 | 11.83047971 | 11.66052472   | 10.91784634 | 11.54377897 | 11.19492321 | 11.50219597  | 12.02124173 | 11.87941287 | 11.93940396 | 10.9947186  | 11.47048652  | 11.1486601  | 11.76803063  |
| ATP2A3     | 11.39541301 | 11.45367539  | 11.1337023  | 11.31499973 | 11.82994883 | 11.8526508  | 11.957673     | 11.45283955 | 11.9241921  | 11.45283955 | 11.76601339  | 11.49944642 | 11.93374249 | 12.05875771 | 12.07757987 | 11.49818959  | 12.02339007 | 11.41747449  |
| ORAI2      | 12.2856289  | 12.1915883   | 12.19608718 | 12.19608718 | 12.19608718 | 12.19608718 | 12.19608718   | 12.19608718 | 12.19608718 | 12.19608718 | 12.19608718  | 12.19608718 | 12.19608718 | 12.19608718 | 12.19608718 | 12.19608718  | 12.19608718 | 12.19608718  |
| ANXA2      | 11.48377665 | 11.8902092   | 11.74066485 | 11.85126304 | 11.73724395 | 12.49668005 | 11.47500552   | 12.20614196 | 11.85385255 | 11.30765234 | 11.31119026  | 11.57971111 | 11.85745199 | 11.69748803 | 12.45099234 | 11.66741265  | 11.33927748 | 12.99871921  |
| MTR3       | 11.29312314 | 11.29312314  | 11.29312314 | 11.29312314 | 11.29312314 | 11.29312314 | 11.29312314   | 11.29312314 | 11.29312314 | 11.29312314 | 11.29312314  | 11.29312314 | 11.29312314 | 11.29312314 | 11.29312314 | 11.29312314  | 11.29312314 | 11.29312314  |
| STGAL1     | 11.82549258 | 12.02113038  | 11.5543206  | 11.0159753  | 11.83860409 | 11.46014693 | 12.12781116   | 12.76657464 | 12.04638774 | 11.82695753 | 12.18310562  | 10.41082424 | 10.9549357  | 11.75720362 | 12.67224745 | 11.65555298  | 11.44909204 | 11.44763416  |
| GRB2       | 11.87559365 | 11.41405727  | 12.25888612 | 12.2742483  | 12.25888612 | 11.79750237 | 11.85194842   | 12.18710209 | 11.77940065 | 11.77940065 | 11.78475612  | 11.75714351 | 11.76359747 | 11.67807995 | 11.95667559 | 11.66168388  | 11.44354867 | 11.92154026  |
| PNRC1      | 11.80756443 | 12.07672106  | 12.36752569 | 12.14554109 | 12.0095072  | 11.72905841 | 11.56268163   | 11.77202932 | 12.23299046 | 11.62279111 | 12.27164601  | 14.2268549  | 11.94897188 | 11.14949803 | 11.74941789 | 12.198083    | 11.5003736  | 12.24508875  |
| CLIC1      | 11.90689109 | 11.92121268  | 11.88560139 | 12.02277906 | 11.8152721  | 12.38257918 | 11.65813472   | 11.2530352  | 11.64616666 | 11.28114557 | 11.82983656  | 11.74646283 | 11.97735576 | 11.75929724 | 11.3536857  | 11.2928259   | 11.29597508 | 11.93411613  |
| PHCC       | 11.45626379 | 11.78057137  | 11.99278173 | 11.99493422 | 11.86663872 | 11.7090669  | 11.62128067   | 11.70427369 | 12.18359037 | 11.78303249 | 12.21571474  | 11.54451168 | 11.71121185 | 11.22538875 | 11.96610555 | 12.15602658  | 11.53293985 | 11.81954666  |
| RHOH       | 11.00618505 | 12.11867136  | 11.61458809 | 11.96352393 | 11.8787242  | 12.1336316  | 11.61820041   | 11.8564623  | 12.18258817 | 11.57701924 | 12.34562813  | 11.53038635 | 12.61641888 | 11.70768779 | 11.96530872 | 11.96105578  | 11.43391999 | 11.52524746  |
| RPS7       | 12.074398   | 12.2764213   | 12.18092888 | 12.197079   | 11.8697345  | 11.65692095 | 11.51705135   | 11.252658   | 12.06382051 | 11.20820281 | 12.05115663  | 12.08774779 | 11.86032892 | 10.96989854 | 10.70377442 | 11.68444831  | 11.38188945 | 11.6086247   |
| CDC69      | 11.6400231  | 11.6400231   | 11.6400231  | 11.6400231  | 11.6400231  | 11.6400231  | 11.6400231    | 11.6400231  | 11.6400231  | 11.6400231  | 11.6400231   | 11.6400231  | 11.6400231  | 11.6400231  | 11.6400231  | 11.6400231   | 11.6400231  | 11.6400231   |
| HSP46      | 11.0290477  | 9.466702593  | 10.01687398 | 9.161812162 | 8.526801265 | 11.0255226  | 11.50040391   | 11.20321281 | 11.92371124 | 11.79849203 | 10.33400464  | 12.5836324  | 11.74479198 | 12.51859598 | 12.02405258 | 11.99195445  | 11.43007005 | 11.43007005  |
| ACL36616.2 | 11.39828344 | 10.96454828  | 10.34955978 | 11.39410185 | 10.66799313 | 12.01052242 | 12.23928021   | 12.07746497 | 12.04081931 | 11.68236023 | 12.24097219  | 11.34126756 | 9.462531882 | 12.18372684 | 11.93057799 | 11.85824446  | 11.9366255  | 11.45621995  |
| MORF4L2    | 11.65210821 | 11.75430679  | 11.15352532 | 11.9575776  | 11.91414801 | 11.38717276 | 11.60582518   | 11.69279837 | 11.78414494 | 11.95978513 | 11.55076298  | 12.18445516 | 12.04869519 | 11.86782978 | 11.63017693 | 11.795629037 | 11.63017693 | 11.795629037 |
| COMMD3     | 11.7412438  | 12.22062787  | 12.20023352 | 11.99532075 | 11.92034455 | 11.90633182 | 11.82894751   | 11.79327155 | 11.56984065 | 11.58092465 | 11.94408909  | 11.9478156  | 11.74202468 | 11.21008861 | 11.69233665 | 11.66512733  | 11.4422806  | 11.4422806   |
| RLP2       | 11.7675644  | 12.00190522  | 12.45514546 | 11.86716566 | 11.81065377 | 11.9646344  | 11.85657724   | 11.05050014 | 11.78419787 | 10.97102418 | 11.89711225  | 11.82399432 | 11.53397381 | 10.99654377 | 10.60088301 | 11.35714448  | 11.33340417 | 11.25729382  |
| IRAK1      | 11.84424254 | 11.94715342  | 11.99484833 | 11.58147324 | 11.59034293 | 11.74802195 | 11.78362899   | 11.88156497 | 11.6442405  | 11.66470176 | 11.87137156  | 11.82084763 | 11.51876361 | 12.02149542 | 11.87582933 | 11.49691565  | 11.7396999  | 11.69249569  |
| IRAK2      | 11.79519073 | 11.65429723  | 12.0314663  | 11.03814623 | 12.25245723 | 11.93238294 | 11.92169326   | 11.47061386 | 11.96330921 | 11.96330921 | 11.92387852  | 11.62946209 | 11.88126561 | 10.83869927 | 11.77719131 | 11.81262561  | 10.83869927 | 11.77719131  |
| DNAI1      | 11.90373559 | 11.6709487   | 11.71034609 | 11.71034609 | 11.71034609 | 11.71034609 | 11.71034609   | 11.71034609 | 11.71034609 | 11.71034609 | 11.71034609  | 11.71034609 | 11.71034609 | 11.71034609 | 11.71034609 | 11.71034609  | 11.71034609 | 11.71034609  |
| TNXP1      | 12.4382979  | 12.32691255  | 12.36142841 | 12.4483245  | 12.36110155 | 11.38239401 | 11.77468099   | 11.93737012 | 12.2859163  | 11.6736162  | 10.9306978   | 12.26920363 | 11.6824623  | 11.5253661  | 11.24826868 | 11.65451993  | 11.7449355  | 10.59398004  |
| TUFM       | 11.91373575 | 12.05848234  | 12.05848234 | 11.91373575 | 11.91373575 | 11.91373575 | 11.91373575   | 11.91373575 | 11.91373575 | 11.91373575 | 11.91373575  | 11.91373575 | 11.91373575 | 11.91373575 | 11.91373575 | 11.91373575  | 11.91373575 | 11.91373575  |
| ACSS1      | 12.18766607 | 11.49036585  | 12.14855157 | 11.47235481 | 11.63309893 | 11.26665237 | 12.04967809   | 11.75629757 | 11.57138214 | 12.00393166 | 11.75953976  | 11.87254884 | 11.44409375 | 11.71293865 | 11.04285027 | 11.6107564   | 11.79389011 | 11.47654773  |
| CALU       | 10.9494062  | 11.5743685   | 11.4696118  | 11.73218137 | 11.4626318  | 11.69082578 | 11.7751691    | 11.87867144 | 11.656924   | 11.87867144 | 11.709396243 | 11.73640573 | 11.85214731 | 11.90733628 | 11.81483339 | 11.71212086  | 11.85180984 | 11.6856542   |
| FBXO18     | 11.66554848 | 11.90643964  | 11.46561319 | 12.0339148  | 11.48533558 | 11.49039996 | 12.01133786   | 11.8048939  | 11.78497502 | 12.01962411 | 12.16621116  | 11.82697028 | 11.05176975 | 11.08408928 | 11.51826955 | 11.69824809  | 12.16059395 | 11.38107359  |
| ICAS2      | 11.05516166 | 11.05516166  | 11.05516166 | 11.05516166 | 11.05516166 | 11.05516166 | 11.05516166   | 11.05516166 | 11.05516166 | 11.05516166 | 11.05516166  | 11.05516166 | 11.05516166 | 11.05516166 | 11.05516166 | 11.05516166  | 11.05516166 | 11.05516166  |
| ARFGAP3    | 11.56816294 | 11.56816294  | 11.56816294 | 11.56816294 | 11.56816294 | 11.56816294 | 11.56816294   | 11.56816294 | 11.56816294 | 11.56816294 | 11.56816294  | 11.56816294 | 11.56816294 | 11.56816294 | 11.56816294 | 11.56816294  | 11.56816294 | 11.56816294  |
| ANAPCS     | 11.68714887 | 11.82000304  | 11.6894     | 11.91600135 | 11.70562953 | 11.77957889 | 11.53108876   | 11.99565715 | 11.29341217 | 11.7448271  | 11.64718588  | 12.12972998 | 11.42867586 | 11.95435239 | 11.95536989 | 11.4926747   | 12.00947047 | 11.73247147  |
| EIFA       | 11.48372381 | 11.90975156  | 11.55578982 | 11.48372381 | 11.90975156 | 11.55578982 | 11.48372381   | 11.90975156 | 11.55578982 | 11.48372381 | 11.90975156  | 11.55578982 | 11.48372381 | 11.90975156 | 11.55578982 | 11.48372381  | 11.90975156 | 11.55578982  |
| WDR45      | 11.70075665 | 12.36575693  | 11.94089916 | 11.9427714  | 11.74890515 | 12.04469235 | 11.66525376   | 11.70230914 | 11.63900831 | 11.43446344 | 11.79486052  | 11.35560229 | 11.83971131 | 12.01478489 | 11.6589769  | 11.71417024  | 11.49715434 | 11.76043660  |
| CAPN2      | 11.52388211 | 11.52388211  | 11.52388211 | 11.52388211 | 11.52388211 | 11.52388211 | 11.52388211   | 11.52388211 | 11.52388211 | 11.52388211 | 11.52388211  | 11.52388211 | 11.52388211 | 11.52388211 | 11.52388211 | 11.52388211  | 11.52388211 | 11.52388211  |
| FBXW7      | 11.48005515 | 11.41904906  | 11.41904906 | 11.73758483 | 11.07435272 | 11.4008444  | 11.51649322   | 12.37698702 | 12.13908375 | 11.97818274 | 12.35607162  | 10.92183915 | 10.88860165 | 10.66993485 | 12.06577082 | 12.10214365  | 11.7763939  | 11.67082138  |
| PSME2      | 11.35083103 | 11.50254603  | 11.81284811 | 11.48559456 | 12.04327552 | 11.95882826 | 11.91760497</ |             |             |             |              |             |             |             |             |              |             |              |

|         |             |             |             |             |             |             |              |              |             |             |              |             |              |             |             |             |             |             |
|---------|-------------|-------------|-------------|-------------|-------------|-------------|--------------|--------------|-------------|-------------|--------------|-------------|--------------|-------------|-------------|-------------|-------------|-------------|
| AKAP9   | 11.42656708 | 11.14041608 | 11.80977776 | 11.89587927 | 11.60930293 | 11.6845472  | 11.5284921   | 12.00140792  | 11.28266505 | 11.88647543 | 11.42212969  | 11.35434252 | 11.60864973  | 12.04729559 | 11.98645319 | 11.83047621 | 12.03502592 | 11.64034359 |
| TAK1BP1 | 11.76707537 | 11.67234677 | 11.91667331 | 11.72888242 | 11.74552723 | 11.82570626 | 11.59325005  | 11.27189955  | 11.46912355 | 11.41410375 | 11.57753433  | 11.70549825 | 11.64008752  | 11.44826433 | 11.47020497 | 11.58264479 | 11.28119214 | 11.62406552 |
| WNT10A  | 11.51012019 | 11.76189133 | 11.91006827 | 11.75873037 | 11.89352288 | 11.74550655 | 11.56423308  | 11.79776054  | 11.42218616 | 11.40371626 | 11.47243056  | 11.73172629 | 12.3545024   | 12.21088709 | 11.30995364 | 11.20824272 | 11.42088898 | 11.07551558 |
| GOLPH3  | 11.66668887 | 11.37637939 | 11.85617646 | 11.64153603 | 11.84277735 | 11.95393949 | 11.79684311  | 10.96119829  | 11.47176003 | 11.58635627 | 11.50044317  | 11.74860516 | 11.76044531  | 11.75553009 | 11.37394576 | 11.62537994 | 11.53284006 | 11.50482336 |
| TMEM163 | 11.38855521 | 11.80553759 | 11.91266589 | 11.74072383 | 11.51753758 | 11.75248689 | 11.17751274  | 11.74072383  | 11.51753758 | 11.74072383 | 11.51753758  | 11.74072383 | 11.51753758  | 11.74072383 | 11.51753758 | 11.74072383 | 11.51753758 | 11.74072383 |
| NME2    | 11.53275943 | 12.0473588  | 11.85667661 | 11.77487845 | 11.9737676  | 11.6770016  | 11.61116541  | 10.9210767   | 11.62647804 | 11.18610755 | 11.69547017  | 11.62566277 | 11.69417874  | 11.56256895 | 11.88349212 | 11.3882111  | 11.8002111  | 11.91314046 |
| STK17B  | 11.12599445 | 11.09967094 | 11.41439717 | 11.64252655 | 11.19054943 | 11.6932673  | 11.59429555  | 11.07736961  | 11.30112819 | 11.28425758 | 11.91064826  | 12.12837671 | 12.14822906  | 11.63848608 | 11.68804532 | 11.8742655  | 11.61251481 |             |
| PRX2    | 11.45402706 | 12.10270067 | 11.69994765 | 11.45402706 | 11.93957939 | 12.23505457 | 11.79070258  | 11.29844699  | 11.08081734 | 11.17753940 | 11.30402515  | 12.016343   | 12.3771793   | 11.8560151  | 11.39089947 | 11.13262617 | 11.10034468 | 11.65659886 |
| CD55    | 10.9141729  | 10.94707369 | 11.30770317 | 10.87741542 | 10.97668441 | 12.15956771 | 11.65369647  | 12.85262477  | 11.61136838 | 11.69879119 | 11.300195385 | 10.95688835 | 11.60252864  | 11.29346588 | 12.89398007 | 11.6029609  | 11.5796701  | 12.84482535 |
| MOGS    | 11.37059757 | 11.6464071  | 11.93834461 | 11.43778207 | 11.67834461 | 11.43778207 | 11.67834461  | 11.43778207  | 11.67834461 | 11.43778207 | 11.67834461  | 11.43778207 | 11.67834461  | 11.43778207 | 11.67834461 | 11.43778207 | 11.67834461 | 11.43778207 |
| IFP2    | 12.05195113 | 12.18793999 | 12.18793999 | 12.05195113 | 11.59947874 | 11.88757703 | 11.79833196  | 11.98796001  | 11.47812223 | 11.94840374 | 11.48875119  | 11.57476583 | 11.30965028  | 11.0864256  | 11.50292871 | 11.24323356 | 11.50292871 | 11.0864256  |
| RLSA    | 11.88323510 | 11.92425513 | 11.61041518 | 11.83406994 | 11.54994767 | 12.06683671 | 11.85259365  | 11.36178652  | 11.23277711 | 11.58518944 | 11.97794238  | 11.44098807 | 11.54281063  | 11.32247665 | 11.50960072 | 11.41548663 | 11.85882555 |             |
| EFNA3   | 11.41534756 | 11.58509546 | 11.09478351 | 11.09478351 | 12.08351432 | 11.21106767 | 12.47802442  | 11.47802442  | 11.21106767 | 12.47802442 | 11.47802442  | 11.21106767 | 12.47802442  | 11.47802442 | 11.21106767 | 12.47802442 | 11.47802442 | 11.21106767 |
| EVH2    | 11.92692649 | 12.11808885 | 12.21005694 | 11.85057443 | 12.07355558 | 11.58328845 | 11.60921629  | 11.20344163  | 11.8357636  | 11.25129452 | 11.69502444  | 11.85214778 | 11.45723167  | 11.40424744 | 11.85851116 | 11.40041738 | 11.08148676 | 11.70001522 |
| SEMA4A  | 11.77583807 | 12.00422828 | 11.91084699 | 11.0723007  | 11.0853955  | 11.73046807 | 11.58796223  | 11.37291308  | 11.69507437 | 11.50847234 | 11.58033679  | 11.70150005 | 11.31748589  | 11.6021591  | 11.13244402 | 11.00812996 | 11.13244402 | 11.00812996 |
| LDHA    | 10.92971293 | 11.26780409 | 11.35211645 | 11.15325442 | 11.85581581 | 11.39771864 | 11.59142583  | 11.84841119  | 11.40273957 | 11.38211539 | 12.02470848  | 11.77156998 | 12.15075758  | 11.73024164 | 12.09667364 | 11.35135714 | 11.59596051 | 12.69786008 |
| DLR12   | 12.2963926  | 12.12458568 | 11.4297068  | 11.67418895 | 11.78359922 | 11.84458667 | 11.78359922  | 11.84458667  | 11.78359922 | 11.84458667 | 11.78359922  | 11.84458667 | 11.78359922  | 11.84458667 | 11.78359922 | 11.84458667 | 11.78359922 | 11.84458667 |
| RPS17   | 11.88289468 | 11.8930967  | 11.68915511 | 11.68915511 | 11.72371123 | 11.52289718 | 11.20814549  | 11.6593803   | 11.0238926  | 11.69461049 | 11.71924324  | 11.17269609 | 11.062952109 | 10.59754038 | 11.04886368 | 11.10573288 | 10.97045159 |             |
| RMXK    | 11.63982046 | 11.59997251 | 11.23639513 | 11.83934514 | 11.73239013 | 11.75520033 | 11.528323457 | 11.21135698  | 11.71211527 | 11.51689052 | 11.71986248  | 12.0375574  | 11.57766658  | 11.72519625 | 11.17625614 | 11.6515651  | 11.2570332  | 11.37294026 |
| TMCO2   | 11.84467693 | 11.9865507  | 11.58032633 | 11.87961138 | 11.94442827 | 11.87961138 | 11.94442827  | 11.87961138  | 11.94442827 | 11.87961138 | 11.94442827  | 11.87961138 | 11.94442827  | 11.87961138 | 11.94442827 | 11.87961138 | 11.94442827 | 11.87961138 |
| GD2     | 11.40802586 | 11.13949461 | 11.13949461 | 11.40802586 | 11.13949461 | 11.13949461 | 11.40802586  | 11.13949461  | 11.13949461 | 11.40802586 | 11.13949461  | 11.13949461 | 11.40802586  | 11.13949461 | 11.13949461 | 11.40802586 | 11.13949461 | 11.13949461 |
| MT-ND3  | 11.6821459  | 11.50655009 | 11.62401461 | 11.68330112 | 11.07456365 | 11.85823042 | 11.66066775  | 11.0529763   | 11.71374083 | 11.69735223 | 11.40395682  | 11.48616862 | 11.09892457  | 11.09508786 | 11.49750001 | 11.65748112 | 11.9818515  | 11.97401009 |
| ID5     | 11.0762544  | 11.12414784 | 11.39532446 | 11.70596801 | 11.18271199 | 11.38724317 | 11.76476766  | 11.67933824  | 11.89946498 | 11.28445175 | 12.05921709  | 11.81529766 | 11.8103969   | 11.54709092 | 11.78647341 | 11.85257168 | 11.32605898 | 11.6101917  |
| ZNF331  | 10.9496976  | 10.50317673 | 10.9496976  | 10.50317673 | 10.9496976  | 10.50317673 | 10.9496976   | 10.50317673  | 10.9496976  | 10.50317673 | 10.9496976   | 10.50317673 | 10.9496976   | 10.50317673 | 10.9496976  | 10.50317673 | 10.9496976  | 10.50317673 |
| ATPS62  | 11.78471283 | 12.29084664 | 11.8035344  | 11.76160949 | 11.93959664 | 11.60182695 | 11.50071169  | 11.06697836  | 11.95341513 | 11.53085486 | 11.72206281  | 11.53236769 | 11.60582932  | 10.80381592 | 11.23136656 | 10.7602388  | 11.34376456 |             |
| RIA1A   | 11.48057345 | 11.69637738 | 11.27100726 | 11.74216097 | 11.77956544 | 11.56598954 | 11.91065221  | 11.54182945  | 11.39349417 | 11.43787379 | 11.6198839   | 11.95905071 | 11.62364756  | 11.56731383 | 11.5596013  | 11.41899286 | 11.6253167  |             |
| TFG     | 11.66045026 | 11.59892599 | 11.26181041 | 11.00583638 | 11.62351516 | 11.60218298 | 11.49053421  | 11.03661375  | 11.64019014 | 11.11011223 | 11.55351     | 12.03544549 | 11.61975246  | 11.94279985 | 11.04952344 | 11.57684724 | 11.7420507  | 11.44763804 |
| TMEM163 | 11.38855521 | 11.80553759 | 11.91266589 | 11.74072383 | 11.51753758 | 11.75248689 | 11.17751274  | 11.74072383  | 11.51753758 | 11.74072383 | 11.51753758  | 11.74072383 | 11.51753758  | 11.74072383 | 11.51753758 | 11.74072383 | 11.51753758 | 11.74072383 |
| ATPGK1  | 11.49897580 | 11.76944322 | 11.76944322 | 11.49897580 | 11.76944322 | 11.76944322 | 11.49897580  | 11.76944322  | 11.76944322 | 11.49897580 | 11.76944322  | 11.76944322 | 11.49897580  | 11.76944322 | 11.76944322 | 11.49897580 | 11.76944322 | 11.76944322 |
| ERN1    | 11.44713082 | 11.46671344 | 11.46811004 | 11.24113289 | 11.14684445 | 12.43473937 | 11.44547214  | 12.01279701  | 11.32426656 | 11.35805277 | 12.13516759  | 11.46880702 | 12.54841029  | 12.12057001 | 11.32558489 | 11.65039286 | 11.7025542  | 11.6398149  |
| RPL31   | 11.99870304 | 11.88757879 | 11.90214716 | 11.5388875  | 11.33347014 | 11.56799083 | 11.33497128  | 11.125371432 | 11.34971285 | 11.27491285 | 12.12574889  | 11.64736476 | 11.93553281  | 11.09857219 | 11.93103918 | 11.57509718 | 11.41180963 | 11.47848178 |
| SEC13   | 11.64609544 | 11.73500114 | 11.64038899 | 11.50456748 | 11.56282721 | 11.82052242 | 11.62265523  | 11.28708515  | 11.50012211 | 11.28840891 | 11.51754947  | 11.54171441 | 11.8487584   | 11.86943486 | 11.37179195 | 11.49387161 | 11.37752116 | 11.5923862  |
| CUTA    | 11.73511263 | 11.76887353 | 11.41632825 | 11.76887353 | 11.41632825 | 11.76887353 | 11.41632825  | 11.76887353  | 11.41632825 | 11.76887353 | 11.41632825  | 11.76887353 | 11.41632825  | 11.76887353 | 11.41632825 | 11.76887353 | 11.41632825 | 11.76887353 |
| SEC22B  | 11.64275302 | 11.32406622 | 11.55147233 | 11.64275302 | 11.32406622 | 11.55147233 | 11.64275302  | 11.32406622  | 11.55147233 | 11.64275302 | 11.32406622  | 11.55147233 | 11.64275302  | 11.32406622 | 11.55147233 | 11.64275302 | 11.32406622 | 11.55147233 |
| OMP2    | 11.46340378 | 11.95563832 | 11.73766012 | 11.46340378 | 11.95563832 | 11.73766012 | 11.46340378  | 11.95563832  | 11.73766012 | 11.46340378 | 11.95563832  | 11.73766012 | 11.46340378  | 11.95563832 | 11.73766012 | 11.46340378 | 11.95563832 | 11.73766012 |
| RPL10A  | 11.78094246 | 11.24914552 | 12.07507737 | 11.78596924 | 11.48256794 | 11.84255842 | 11.74071893  | 11.9449338   | 11.77736566 | 12.23475302 | 11.62043954  | 11.94783333 | 11.87711726  | 11.42328968 | 11.34486809 | 11.4486809  | 11.34486809 | 11.4486809  |
| KDEL1   | 11.60657993 | 11.69254245 | 11.57231732 | 11.75170852 | 11.65438383 | 11.97864899 | 11.55596761  | 11.47316164  | 11.61084628 | 11.34460298 | 11.85691851  | 11.26717386 | 11.52357988  | 11.9547836  | 11.06832364 | 11.54268282 | 11.14529506 | 11.10235895 |
| NRA42   | 10.48648216 | 10.55421921 | 10.73909102 | 10.9262394  | 10.9748614  | 11.87762087 | 11.58861733  | 11.76476664  | 12.48315432 | 11.2073282  | 11.91175647  | 11.47836329 | 11.18393064  | 11.05753687 | 11.2675352  | 11.24652371 | 11.49292513 |             |
| PRMT1   | 11.61730672 | 12.02894847 | 12.0210912  | 11.47335936 | 11.79821609 | 12.12146648 | 11.61081751  | 10.91990688  | 11.37927205 | 11.09585449 | 11.19779575  | 11.85232997 | 11.953385    | 11.85156687 | 11.91034169 | 11.37721364 | 11.80793516 | 11.28033558 |
| NEU1    | 11.66181536 | 11.54949475 | 11.52298871 | 11.79643393 | 11.74270192 | 11.47674365 | 11.9455807   | 11.46808374  | 11.68570018 | 11.32181774 | 11.69961426  | 11.57191616 | 11.57246786  | 11.0622075  | 11.53003239 | 11.44862838 | 11.52039462 | 11.45248009 |
| RASGRP3 | 11.12739762 | 11.14772783 | 11.57621251 | 11.17196275 | 11.14772783 | 11.1196921  | 11.08485764  | 11.86097893  | 11.20247967 | 11.77978301 | 11.30947502  | 11.09822459 | 11.17106122  | 11.10761222 | 11.12000585 | 11.99542931 | 11.73129254 |             |
| ZBTB58  | 11.71692743 | 11.38111063 | 11.84600995 | 11.06936741 | 11.44411812 | 11.3262101  | 11.37782108  | 11.08654547  | 11.81760986 | 1           |              |             |              |             |             |             |             |             |

|         |             |             |             |             |             |             |              |             |              |             |             |             |              |             |             |             |             |             |
|---------|-------------|-------------|-------------|-------------|-------------|-------------|--------------|-------------|--------------|-------------|-------------|-------------|--------------|-------------|-------------|-------------|-------------|-------------|
| RUBCN   | 11.38896956 | 11.16910077 | 11.49707877 | 11.44547736 | 11.80541892 | 11.17802149 | 11.809025289 | 11.40029339 | 11.36787408  | 11.41717841 | 11.58298553 | 11.21386685 | 11.56937167  | 11.76979021 | 12.03073675 | 11.38389331 | 11.42237413 | 11.71065623 |
| TMEMZ48 | 11.25041628 | 11.56745804 | 11.43266172 | 11.65488937 | 11.64617124 | 11.5292079  | 11.18964237  | 11.70541006 | 11.28961221  | 11.57448015 | 11.31196665 | 11.79865685 | 11.71616704  | 11.43843549 | 11.38250732 | 11.30091249 | 11.43494958 |             |
| PPPICB  | 11.36600475 | 11.52714514 | 11.55859446 | 11.30842881 | 11.47612412 | 11.44906226 | 11.63394583  | 11.03934623 | 11.1642835   | 11.70684594 | 11.60494376 | 11.6433204  | 11.00939373  | 11.2589926  | 11.03900957 | 11.68845522 | 11.40640760 |             |
| RNF10   | 11.23448477 | 11.56495612 | 11.65237394 | 11.38547842 | 11.51981464 | 11.38131938 | 11.24105041  | 11.53165851 | 11.24593594  | 11.34674714 | 11.3705456  | 11.43688688 | 11.098233017 | 11.55740236 | 11.8883439  | 11.41587943 | 11.56660275 | 11.57307063 |
| ACDZ    | 11.48574497 | 11.80965922 | 11.71538796 | 11.71054732 | 11.3974544  | 11.3974544  | 11.43647652  | 11.37819758 | 11.43647652  | 11.73805725 | 11.43337897 | 11.43814801 | 11.07864676  | 11.58471592 | 11.58471592 | 11.43179282 | 11.39144466 |             |
| CRNEB12 | 11.62487059 | 11.62487059 | 11.62487059 | 11.62487059 | 11.62487059 | 11.62487059 | 11.62487059  | 11.62487059 | 11.62487059  | 11.62487059 | 11.62487059 | 11.62487059 | 11.62487059  | 11.62487059 | 11.62487059 | 11.62487059 | 11.62487059 | 11.62487059 |
| EF252   | 11.47307829 | 11.37651524 | 11.73113501 | 11.52436712 | 11.83595245 | 11.58899714 | 11.5251593   | 11.71251924 | 11.048611793 | 11.80761927 | 11.90885998 | 11.37759408 | 11.82620428  | 11.88928087 | 11.75365929 | 11.05662509 | 11.82287898 | 11.02301904 |
| VAPA    | 11.70146045 | 11.71319047 | 11.47765843 | 11.73119047 | 11.45006097 | 11.86978438 | 11.76167375  | 11.39086667 | 11.01410598  | 11.22256888 | 11.36921586 | 11.84341528 | 11.87397939  | 11.98000455 | 11.22627207 | 11.94589317 | 11.30421186 |             |
| TCZ5    | 11.22649357 | 11.64395787 | 11.45755612 | 11.1772882  | 11.11662928 | 11.49757801 | 11.37059632  | 11.73167875 | 11.28054394  | 11.68219183 | 11.18644661 | 11.45278084 | 11.5066093   | 11.38250594 | 11.85818631 | 11.35178239 | 11.8267605  | 11.38754675 |
| PIA2    | 11.28649018 | 11.61054846 | 11.71385797 | 11.31045846 | 11.71385797 | 11.31045846 | 11.71385797  | 11.31045846 | 11.71385797  | 11.31045846 | 11.71385797 | 11.31045846 | 11.71385797  | 11.31045846 | 11.71385797 | 11.31045846 | 11.71385797 | 11.31045846 |
| TCF3    | 11.02935205 | 11.02935205 | 11.02935205 | 11.02935205 | 11.02935205 | 11.02935205 | 11.02935205  | 11.02935205 | 11.02935205  | 11.02935205 | 11.02935205 | 11.02935205 | 11.02935205  | 11.02935205 | 11.02935205 | 11.02935205 | 11.02935205 | 11.02935205 |
| COF21   | 11.29630808 | 11.26041947 | 11.78245198 | 11.41370971 | 11.83297232 | 11.7249177  | 11.58247994  | 11.1058776  | 11.7000004   | 11.37497742 | 11.50713645 | 11.41845892 | 11.28454444  | 11.55593108 | 11.1183751  | 11.47687685 | 11.38802707 | 11.03258944 |
| DTN1    | 11.48471527 | 11.74419889 | 11.51056642 | 11.61854903 | 11.61854903 | 11.61854903 | 11.61854903  | 11.61854903 | 11.61854903  | 11.61854903 | 11.61854903 | 11.61854903 | 11.61854903  | 11.61854903 | 11.61854903 | 11.61854903 | 11.61854903 | 11.61854903 |
| PARM1   | 11.0073055  | 11.09721907 | 11.69325364 | 11.9709494  | 11.43221343 | 11.58273176 | 11.37116009  | 11.37617911 | 11.65931418  | 11.6359129  | 11.47306183 | 11.17004256 | 11.24993753  | 11.37188096 | 11.48919286 | 11.39564819 | 11.36485503 | 11.84353871 |
| RBM3    | 11.70149111 | 11.74288165 | 11.47288165 | 11.88156177 | 11.43629252 | 11.93958963 | 11.62159326  | 11.00718448 | 11.39105433  | 11.09346706 | 11.45592833 | 11.28061525 | 11.79382691  | 11.47575569 | 11.07301723 | 11.12024113 | 11.04881937 | 11.07949919 |
| HRRNPM  | 11.61172144 | 11.5947593  | 11.40866437 | 11.87022605 | 11.63897201 | 11.40199486 | 11.7017485   | 11.30229745 | 11.70767218  | 11.2914268  | 11.0397176  | 11.70191141 | 11.09389478  | 11.9108195  | 11.39228513 | 11.41195124 | 11.39031115 | 11.53651889 |
| RTN3    | 11.66895321 | 11.22699108 | 11.58306922 | 11.66895321 | 11.58306922 | 11.66895321 | 11.58306922  | 11.66895321 | 11.58306922  | 11.66895321 | 11.58306922 | 11.66895321 | 11.58306922  | 11.66895321 | 11.58306922 | 11.66895321 | 11.58306922 | 11.66895321 |
| RAP1B   | 11.20928069 | 11.09716533 | 11.14084246 | 11.20928069 | 11.09716533 | 11.14084246 | 11.20928069  | 11.09716533 | 11.14084246  | 11.20928069 | 11.09716533 | 11.14084246 | 11.20928069  | 11.09716533 | 11.14084246 | 11.20928069 | 11.09716533 | 11.14084246 |
| HPB1    | 11.03621702 | 11.57106488 | 11.48032086 | 11.48032086 | 11.57106488 | 11.48032086 | 11.57106488  | 11.48032086 | 11.57106488  | 11.48032086 | 11.57106488 | 11.48032086 | 11.57106488  | 11.48032086 | 11.57106488 | 11.48032086 | 11.57106488 | 11.48032086 |
| JAK1    | 11.60074403 | 11.46173027 | 11.70865463 | 11.58445313 | 11.45452073 | 11.58445313 | 11.45452073  | 11.58445313 | 11.45452073  | 11.58445313 | 11.45452073 | 11.58445313 | 11.45452073  | 11.58445313 | 11.45452073 | 11.58445313 | 11.45452073 | 11.58445313 |
| CTT1    | 11.02368227 | 11.53667597 | 11.53667597 | 11.53667597 | 11.53667597 | 11.53667597 | 11.53667597  | 11.53667597 | 11.53667597  | 11.53667597 | 11.53667597 | 11.53667597 | 11.53667597  | 11.53667597 | 11.53667597 | 11.53667597 | 11.53667597 | 11.53667597 |
| SERINC1 | 11.77487404 | 11.36497313 | 11.49946223 | 11.36497313 | 11.49946223 | 11.36497313 | 11.49946223  | 11.36497313 | 11.49946223  | 11.36497313 | 11.49946223 | 11.36497313 | 11.49946223  | 11.36497313 | 11.49946223 | 11.36497313 | 11.49946223 | 11.36497313 |
| PLP2    | 11.40495303 | 11.68633505 | 11.65822459 | 11.82712201 | 11.51272681 | 11.7174334  | 11.3869713   | 11.41291706 | 11.50062022  | 11.08989698 | 11.64659792 | 11.11873909 | 11.27961395  | 11.7953071  | 11.14277414 | 11.15169515 | 11.8892897  | 11.90105365 |
| GTFA3   | 11.38334797 | 11.83547257 | 11.90423677 | 11.61596095 | 11.98483466 | 11.38836835 | 11.57349117  | 11.2236545  | 11.23014829  | 11.40337486 | 11.45437646 | 11.6668482  | 11.61107334  | 11.1483894  | 11.97643124 | 11.1113131  | 11.90637296 | 11.90637296 |
| ARID5B  | 9.548695456 | 11.3706912  | 11.3706912  | 11.3706912  | 11.3706912  | 11.3706912  | 11.3706912   | 11.3706912  | 11.3706912   | 11.3706912  | 11.3706912  | 11.3706912  | 11.3706912   | 11.3706912  | 11.3706912  | 11.3706912  | 11.3706912  | 11.3706912  |
| XCRC5   | 11.06678056 | 11.61764825 | 11.0581088  | 11.06678056 | 11.61764825 | 11.0581088  | 11.06678056  | 11.61764825 | 11.0581088   | 11.06678056 | 11.61764825 | 11.0581088  | 11.06678056  | 11.61764825 | 11.0581088  | 11.06678056 | 11.61764825 | 11.0581088  |
| SPAG4   | 11.20171895 | 11.08168123 | 11.91557237 | 11.91557237 | 11.08168123 | 11.91557237 | 11.08168123  | 11.91557237 | 11.08168123  | 11.91557237 | 11.08168123 | 11.91557237 | 11.08168123  | 11.91557237 | 11.08168123 | 11.91557237 | 11.08168123 | 11.91557237 |
| JAK1    | 11.60074403 | 11.46173027 | 11.70865463 | 11.58445313 | 11.45452073 | 11.58445313 | 11.45452073  | 11.58445313 | 11.45452073  | 11.58445313 | 11.45452073 | 11.58445313 | 11.45452073  | 11.58445313 | 11.45452073 | 11.58445313 | 11.45452073 | 11.58445313 |
| CTT1    | 11.02368227 | 11.53667597 | 11.53667597 | 11.53667597 | 11.53667597 | 11.53667597 | 11.53667597  | 11.53667597 | 11.53667597  | 11.53667597 | 11.53667597 | 11.53667597 | 11.53667597  | 11.53667597 | 11.53667597 | 11.53667597 | 11.53667597 | 11.53667597 |
| SERINC1 | 11.77487404 | 11.36497313 | 11.49946223 | 11.36497313 | 11.49946223 | 11.36497313 | 11.49946223  | 11.36497313 | 11.49946223  | 11.36497313 | 11.49946223 | 11.36497313 | 11.49946223  | 11.36497313 | 11.49946223 | 11.36497313 | 11.49946223 | 11.36497313 |
| PLP2    | 11.40495303 | 11.68633505 | 11.65822459 | 11.82712201 | 11.51272681 | 11.7174334  | 11.3869713   | 11.41291706 | 11.50062022  | 11.08989698 | 11.64659792 | 11.11873909 | 11.27961395  | 11.7953071  | 11.14277414 | 11.15169515 | 11.8892897  | 11.90105365 |
| GTFA3   | 11.38334797 | 11.83547257 | 11.90423677 | 11.61596095 | 11.98483466 | 11.38836835 | 11.57349117  | 11.2236545  | 11.23014829  | 11.40337486 | 11.45437646 | 11.6668482  | 11.61107334  | 11.1483894  | 11.97643124 | 11.1113131  | 11.90637296 | 11.90637296 |
| ARID5B  | 9.548695456 | 11.3706912  | 11.3706912  | 11.3706912  | 11.3706912  | 11.3706912  | 11.3706912   | 11.3706912  | 11.3706912   | 11.3706912  | 11.3706912  | 11.3706912  | 11.3706912   | 11.3706912  | 11.3706912  | 11.3706912  | 11.3706912  | 11.3706912  |
| XCRC5   | 11.06678056 | 11.61764825 | 11.0581088  | 11.06678056 | 11.61764825 | 11.0581088  | 11.06678056  | 11.61764825 | 11.0581088   | 11.06678056 | 11.61764825 | 11.0581088  | 11.06678056  | 11.61764825 | 11.0581088  | 11.06678056 | 11.61764825 | 11.0581088  |
| SPAG4   | 11.20171895 | 11.08168123 | 11.91557237 | 11.91557237 | 11.08168123 | 11.91557237 | 11.08168123  | 11.91557237 | 11.08168123  | 11.91557237 | 11.08168123 | 11.91557237 | 11.08168123  | 11.91557237 | 11.08168123 | 11.91557237 | 11.08168123 | 11.91557237 |
| JAK1    | 11.60074403 | 11.46173027 | 11.70865463 | 11.58445313 | 11.45452073 | 11.58445313 | 11.45452073  | 11.58445313 | 11.45452073  | 11.58445313 | 11.45452073 | 11.58445313 | 11.45452073  | 11.58445313 | 11.45452073 | 11.58445313 | 11.45452073 | 11.58445313 |
| CTT1    | 11.02368227 | 11.53667597 | 11.53667597 | 11.53667597 | 11.53667597 | 11.53667597 | 11.53667597  | 11.53667597 | 11.53667597  | 11.53667597 | 11.53667597 | 11.53667597 | 11.53667597  | 11.53667597 | 11.53667597 | 11.53667597 | 11.53667597 | 11.53667597 |
| SERINC1 | 11.77487404 | 11.36497313 | 11.49946223 | 11.36497313 | 11.49946223 | 11.36497313 | 11.49946223  | 11.36497313 | 11.49946223  | 11.36497313 | 11.49946223 | 11.36497313 | 11.49946223  | 11.36497313 | 11.49946223 | 11.36497313 | 11.49946223 | 11.36497313 |
| PLP2    | 11.40495303 | 11.68633505 | 11.65822459 | 11.82712201 | 11.51272681 | 11.7174334  | 11.3869713   | 11.41291706 | 11.50062022  | 11.08989698 | 11.64659792 | 11.11873909 | 11.27961395  | 11.7953071  | 11.14277414 | 11.15169515 | 11.8892897  | 11.90105365 |
| GTFA3   | 11.38334797 | 11.83547257 | 11.90423677 | 11.61596095 | 11.98483466 | 11.38836835 | 11.57349117  | 11.2236545  | 11.23014829  | 11.40337486 | 11.45437646 | 11.6668482  | 11.61107334  | 11.1483894  | 11.97643124 | 11.1113131  | 11.90637296 | 11.90637296 |
| ARID5B  | 9.548695456 | 11.3706912  | 11.3706912  | 11.3706912  | 11.3706912  | 11.3706912  | 11.3706912   | 11.3706912  | 11.3706912   | 11.3706912  | 11.3706912  | 11.3706912  | 11.3706912   | 11.3706912  | 11.3706912  | 11.3706912  | 11.3706912  | 11.3706912  |
| XCRC5   | 11.06678056 | 11.61764825 | 11.0581088  | 11.06678056 | 11.61764825 | 11.0581088  | 11.06678056  | 11.61764825 | 11.0581088   | 11.0        |             |             |              |             |             |             |             |             |



|          |             |             |             |              |              |             |             |             |             |             |              |             |             |             |             |              |             |             |
|----------|-------------|-------------|-------------|--------------|--------------|-------------|-------------|-------------|-------------|-------------|--------------|-------------|-------------|-------------|-------------|--------------|-------------|-------------|
| TM95F1   | 11.14197824 | 11.30540749 | 11.64976386 | 10.99121643  | 11.35881249  | 11.63661645 | 11.58795642 | 11.2252702  | 11.44946175 | 10.90898691 | 11.42299329  | 11.29782727 | 11.67680432 | 10.93324541 | 11.00671286 | 11.22727257  | 10.915694   | 10.89135009 |
| USP48    | 10.19286    | 10.04592476 | 10.80025011 | 11.28828237  | 11.17783655  | 11.21242665 | 11.01252326 | 11.18211786 | 11.49207349 | 11.30037894 | 11.23671574  | 10.97412458 | 11.4438796  | 11.66351111 | 11.44764661 | 11.42340097  | 11.38518474 | 11.22806859 |
| MDH1     | 11.28713244 | 11.42344879 | 11.40891095 | 11.67364039  | 11.722782039 | 11.07700971 | 11.40543657 | 10.68920772 | 11.03068916 | 10.94608267 | 10.97888096  | 11.94857309 | 11.95106755 | 11.951765   | 10.72440099 | 11.10449319  | 11.14381349 | 11.12806859 |
| YVH48    | 11.12091729 | 11.09155765 | 11.28405466 | 11.13687215  | 11.57955801  | 11.3663298  | 11.16309614 | 11.17371865 | 11.2738564  | 11.2751661  | 11.23649533  | 10.96272918 | 11.93985685 | 11.40283146 | 10.84572398 | 11.29080741  | 10.96545731 | 11.35928797 |
| AP06FC2C | 10.79866266 | 11.51109407 | 11.30126551 | 11.19714159  | 11.20468452  | 11.09841884 | 11.15537359 | 11.23519311 | 11.25137159 | 11.23519311 | 11.22791404  | 10.94803241 | 11.41854664 | 11.1326755  | 11.21674604 | 11.09789672  | 11.09579963 | 11.17018531 |
| TERF1P   | 11.27448326 | 11.27448326 | 11.20044294 | 11.15427532  | 11.54221613  | 11.46843115 | 11.09896719 | 11.23068413 | 11.18273751 | 11.23068413 | 11.18273751  | 11.65858022 | 11.7878655  | 11.55051126 | 10.95654255 | 11.23437165  | 11.09680747 | 11.8812165  |
| PSM85    | 11.27046332 | 11.42045199 | 11.56793581 | 11.29446575  | 11.40685311  | 11.82806311 | 11.53361785 | 10.88427959 | 11.06913574 | 10.91332413 | 11.02925811  | 11.46516557 | 11.81305659 | 11.2327852  | 10.6583882  | 10.94319049  | 11.0740127  | 11.14762741 |
| AKAP2    | 11.26663231 | 11.39487926 | 11.44590275 | 11.20493959  | 11.72453181  | 11.00134068 | 10.46609178 | 11.00801958 | 11.14254474 | 11.31062251 | 11.43639967  | 10.48991884 | 11.03437136 | 11.05639194 | 11.15765266 | 11.118913804 | 10.68557513 | 11.2806859  |
| ACTR3    | 10.5420068  | 11.0481204  | 11.1941622  | 11.33300952  | 11.30984762  | 11.26731019 | 11.44733405 | 11.22613307 | 11.61525405 | 11.14684443 | 11.2912752   | 11.35224601 | 11.07789256 | 11.32944756 | 11.16232481 | 11.15365865  | 11.11703261 | 10.9941392  |
| FAM69A   | 11.19792068 | 11.31190263 | 11.61977755 | 11.61977755  | 11.54468614  | 11.16485281 | 11.26386828 | 10.89121495 | 11.24588413 | 11.17507581 | 11.24240501  | 11.87820513 | 11.32780543 | 11.21678374 | 11.13808054 | 11.39933021  | 11.12951459 | 11.12852453 |
| SDHD     | 11.20079471 | 11.24061615 | 11.40616749 | 11.24061615  | 11.34516877  | 11.56727466 | 10.51188898 | 10.99930797 | 10.79072133 | 10.95880286 | 11.64701749  | 11.87185167 | 11.56024638 | 10.9787563  | 11.01004757 | 10.74445356  | 11.58701116 | 11.11004757 |
| COX5A    | 10.97850839 | 11.35624348 | 11.29962506 | 11.25697135  | 11.58607944  | 11.51686678 | 11.04428047 | 11.07320938 | 11.39964332 | 10.88402824 | 11.05198216  | 11.21974846 | 11.09519236 | 11.41617156 | 10.63360664 | 11.15344723  | 10.86974162 | 11.33128545 |
| E15A     | 12.74736833 | 10.82472113 | 12.06941126 | 11.90614376  | 10.96405096  | 11.15736756 | 11.14835476 | 11.21431381 | 11.34366872 | 11.61807266 | 10.65373633  | 10.43866868 | 10.78144405 | 11.31920888 | 11.7675016  | 10.87638273  |             |             |
| NUM12P   | 11.14848901 | 10.93175532 | 10.73520666 | 12.1237015   | 11.0025229   | 11.25902852 | 10.92430442 | 11.73670338 | 11.85414216 | 10.25663403 | 11.65473062  | 10.77954591 | 10.88723239 | 11.21394686 | 11.70493551 | 11.68446452  | 11.68764799 | 11.0063346  |
| ZFAND5   | 11.10959511 | 10.19091673 | 11.13719607 | 11.09091594  | 11.06456642  | 11.4807387  | 11.5141094  | 11.16522423 | 11.26019032 | 11.2910691  | 11.50645449  | 10.74431997 | 11.52634776 | 11.1618315  | 11.24310561 | 11.29178591  | 11.3550006  | 11.38209202 |
| SDMT1    | 11.74211728 | 11.82496901 | 11.2921507  | 11.0309260   | 11.73011786  | 11.52392688 | 11.32179533 | 10.55727314 | 11.11617556 | 10.61383339 | 11.3166158   | 11.39523402 | 11.30626199 | 11.48448291 | 10.82527449 | 10.82759889  | 10.67670959 | 10.9705436  |
| PTP4A1   | 10.79857822 | 10.87780681 | 10.24864499 | 10.87780681  | 11.70214434  | 11.33687551 | 11.51479285 | 11.68976617 | 11.70847949 | 11.06344869 | 12.07444749  | 10.57276948 | 11.61895815 | 10.96047203 | 11.3326823  | 11.63212102  | 11.12251669 | 11.07970883 |
| ATP5J    | 11.24523178 | 11.41093058 | 11.55812228 | 11.15348775  | 11.58779259  | 11.46063846 | 11.2140144  | 10.57379259 | 10.85389231 | 10.68327862 | 10.8754478   | 11.78938545 | 11.60615948 | 11.5616742  | 10.56733808 | 10.73968958  | 10.7536946  | 11.3191177  |
| RR1      | 11.81291536 | 11.90640494 | 11.76623295 | 11.60853225  | 11.56971545  | 11.2404036  | 11.22932628 | 10.94593451 | 11.75279364 | 11.2258376  | 11.2258376   | 11.39866315 | 11.52805284 | 10.96768155 | 10.8561913  | 10.71680035  | 11.34667344 | 11.34667344 |
| ATPH1    | 11.6199348  | 11.73550666 | 11.21751793 | 11.21752956  | 11.39758906  | 11.52051847 | 11.26467118 | 10.88501099 | 10.6164255  | 10.9026132  | 11.43278753  | 11.51220184 | 11.23030994 | 10.7998398  | 10.98468317 | 11.03386314  | 11.40959832 | 11.40959832 |
| TXV      | 11.04191207 | 11.52380664 | 11.37624731 | 11.19226347  | 11.9330805   | 11.25439559 | 10.73795124 | 10.86973588 | 10.64897049 | 11.15505277 | 11.5896256   | 11.4598660  | 11.34893017 | 11.0922665  | 11.0922665  | 10.9690704   | 10.6619404  | 11.8174811  |
| SRP10B   | 9.607418255 | 9.965879923 | 9.385118437 | 9.57656533   | 9.29758122   | 11.06842054 | 11.2463798  | 11.1139957  | 11.35958983 | 10.36847842 | 11.09392086  | 11.03816873 | 11.19622665 | 11.80408199 | 11.46881544 | 11.18468859  | 11.18468859 | 11.18468859 |
| GALNT2   | 10.74549236 | 11.09816306 | 11.23348202 | 11.44022579  | 11.2833127   | 11.2242583  | 11.04875344 | 11.63861595 | 11.11415564 | 11.61761994 | 11.64557034  | 10.9029062  | 10.8270969  | 11.09029286 | 11.53904205 | 11.03896509  | 11.50710484 | 11.21606262 |
| H3FA     | 11.36855807 | 11.41564133 | 11.39902092 | 11.36855807  | 11.28832457  | 11.3389214  | 11.17373725 | 11.53270625 | 11.40031353 | 11.8699337  | 11.67634654  | 10.89260056 | 11.15965027 | 10.97852538 | 11.05209811 | 11.17170574  | 11.11829083 | 11.09647345 |
| NDUF41A3 | 11.43796558 | 11.26861356 | 11.58780047 | 11.26861356  | 11.74080871  | 11.34562633 | 10.92030215 | 10.94102215 | 10.9836487  | 11.26652104 | 11.29875296  | 11.38020742 | 10.6272771  | 10.8775344  | 10.73800213 | 11.06315389  | 11.06315389 | 11.06315389 |
| CPN5E    | 11.02797744 | 11.48477655 | 11.44151058 | 11.62334231  | 11.20667732  | 11.4042044  | 11.39234295 | 10.93452319 | 11.03979784 | 10.96325124 | 11.51725927  | 11.59707319 | 11.57657394 | 10.80207462 | 10.5995154  | 10.69290374  | 11.57328289 | 11.57328289 |
| DDX17    | 10.95463206 | 10.98314799 | 11.24944709 | 10.94740888  | 11.18208103  | 11.70418002 | 11.26717478 | 11.40496282 | 11.14423968 | 11.39087984 | 10.955239    | 11.02728824 | 11.33044271 | 11.2214104  | 11.47961086 | 11.20481907  | 11.49471952 | 10.89143178 |
| ATP10B   | 11.28523609 | 11.72380258 | 11.60953359 | 11.60953359  | 11.59749064  | 11.46420929 | 11.46420929 | 11.24598002 | 11.24598002 | 11.45927247 | 11.45927247  | 11.45927247 | 11.45927247 | 11.45927247 | 11.45927247 | 11.45927247  | 11.45927247 | 11.45927247 |
| NP2      | 11.51600691 | 11.0557821  | 11.06805023 | 11.0557821   | 11.06805023  | 11.06805023 | 11.06805023 | 11.06805023 | 11.06805023 | 11.06805023 | 11.06805023  | 11.06805023 | 11.06805023 | 11.06805023 | 11.06805023 | 11.06805023  | 11.06805023 | 11.06805023 |
| UBA5     | 11.55501585 | 11.78197688 | 11.82784235 | 11.32321081  | 11.46443665  | 11.48793932 | 11.23476259 | 10.8383532  | 11.28253139 | 10.5948611  | 11.23002559  | 11.1794326  | 11.18912927 | 11.02156981 | 10.8471238  | 10.8687213   | 10.51424361 | 11.63755242 |
| NOB82    | 10.8817021  | 11.0342839  | 11.62038464 | 11.12478478  | 11.21931582  | 11.64928889 | 11.11986202 | 11.03140259 | 10.93106064 | 11.87145028 | 11.76669042  | 11.59428572 | 11.49147463 | 11.16201845 | 11.19982417 | 11.13171675  | 11.13171675 | 11.13171675 |
| SRP68    | 11.41065015 | 10.70981236 | 11.32824566 | 11.67411997  | 11.45394301  | 10.93756463 | 11.255786   | 11.02661373 | 11.4210811  | 11.15278682 | 11.04149041  | 11.39751983 | 11.01374854 | 11.76403809 | 10.97494473 | 11.31254219  | 10.92314714 | 10.94331911 |
| UBA5     | 11.5935173  | 11.09929225 | 11.5490333  | 11.11800856  | 11.51068182  | 11.25413087 | 11.22091312 | 11.01671264 | 11.07573888 | 10.92352379 | 11.024358509 | 11.24528027 | 11.33194709 | 11.10744164 | 11.05420676 | 11.05420676  | 11.05420676 | 11.05420676 |
| DYNN1L   | 11.03770614 | 11.18781135 | 11.72756418 | 11.45710557  | 11.66400555  | 11.41987674 | 11.5132895  | 10.93135828 | 11.29719459 | 10.85748127 | 11.21586278  | 11.65934556 | 11.1349354  | 11.21245041 | 10.69632464 | 11.15387546  | 11.03024668 | 10.8551586  |
| MARCKS   | 11.14552371 | 11.18652379 | 11.18652379 | 11.18652379  | 11.18652379  | 11.18652379 | 11.18652379 | 11.18652379 | 11.18652379 | 11.18652379 | 11.18652379  | 11.18652379 | 11.18652379 | 11.18652379 | 11.18652379 | 11.18652379  | 11.18652379 | 11.18652379 |
| COX5B    | 10.57376286 | 10.9000614  | 9.658906564 | 9.658906564  | 9.658906564  | 9.658906564 | 9.658906564 | 9.658906564 | 9.658906564 | 9.658906564 | 9.658906564  | 9.658906564 | 9.658906564 | 9.658906564 | 9.658906564 | 9.658906564  | 9.658906564 | 9.658906564 |
| IARS     | 10.80326834 | 10.09518885 | 10.79077512 | 11.24750618  | 11.17625574  | 10.55107792 | 10.05588659 | 11.23892821 | 10.3574728  | 11.43270384 | 10.79935891  | 11.22020658 | 10.91393453 | 11.63750522 | 11.03975355 | 11.2540873   | 11.5219678  | 11.57555142 |
| PRDX5    | 11.1651018  | 11.34241495 | 11.22780479 | 11.122780479 | 11.46529612  | 11.35820834 | 11.05820834 | 11.02937925 | 10.87410123 | 10.82547335 | 11.12489576  | 11.29478519 | 11.58974664 | 11.60019417 | 11.05812952 | 11.0167955   | 11.0167955  | 11.0167955  |
| KHDC2    | 11.2659999  | 11.31892886 | 11.56145973 | 11.32853008  | 11.09811253  | 10.79066685 | 10.56230083 | 11.27732386 | 11.13245461 | 11.1872577  | 11.22466889  | 11.49707905 | 11.10948885 | 10.7974915  | 11.20450887 | 11.02193947  | 11.20450887 | 11.02193947 |
| ATP5E    | 11.03259665 | 11.1889968  | 11.19435327 | 11.01990764  | 11.19435327  | 11.19435327 | 11.19435327 | 11.19435327 | 11.19435327 | 11.19435327 | 11.19435327  | 11.19435327 | 11.19435327 | 11.19435327 | 11.19435327 | 11.19435327  | 11.19435327 | 11.19435327 |
| PIPA     | 11.06105405 | 11.57646566 | 11.39671385 | 11.38874233  | 11.04901784  | 11.46658003 | 11.10100715 | 11.18633899 | 11.51393313 | 11.48319957 | 10.84129997  | 11.3451209  | 10.7996384  | 11.19132479 | 10.8805762  | 11.41726572  | 10.8805762  | 11.41726572 |
| SLC25A3  | 11.45513579 | 11.32313185 | 10.95839437 | 10.95839437  | 11.31680742  | 11.62533978 | 11          |             |             |             |              |             |             |             |             |              |             |             |

|          |             |             |             |             |             |             |             |              |             |             |             |             |             |             |             |             |             |             |
|----------|-------------|-------------|-------------|-------------|-------------|-------------|-------------|--------------|-------------|-------------|-------------|-------------|-------------|-------------|-------------|-------------|-------------|-------------|
| CCT8     | 10.99399281 | 11.56652307 | 11.16639681 | 11.55211474 | 11.87084801 | 11.3659492  | 10.87640434 | 11.07367415  | 11.43653644 | 10.98397177 | 11.17905764 | 11.64579441 | 10.72485491 | 10.70090021 | 10.99460891 | 11.40817192 | 10.99952132 | 10.9634299  |
| PPP1R10  | 11.68934311 | 11.27900471 | 11.32266885 | 11.16814254 | 11.21701085 | 10.92345717 | 11.80134921 | 11.30405111  | 11.07922004 | 11.307492   | 11.26621465 | 10.75240457 | 10.60304345 | 11.01308616 | 11.41623301 | 11.15649975 | 11.18339117 | 10.5798903  |
| LRC59    | 11.33994904 | 11.15549661 | 11.0725477  | 11.38940362 | 11.19410078 | 11.24611389 | 11.04932602 | 11.13328022  | 11.16566328 | 11.05708379 | 11.25652873 | 10.98736556 | 10.70815767 | 11.14080106 | 11.10397827 | 11.17552688 | 10.95455881 | 10.99385706 |
| HMCC5    | 10.66454182 | 10.50408415 | 10.4680905  | 11.10399598 | 10.82144175 | 11.02724604 | 11.12724604 | 11.56682187  | 11.51189189 | 11.03335618 | 11.42808576 | 10.60366731 | 11.85337432 | 10.70480473 | 11.70127177 | 11.51152578 | 10.79994785 | 11.57445329 |
| ALKH5    | 11.57066243 | 11.66545042 | 11.08342043 | 11.29740895 | 11.04309771 | 11.41642994 | 11.04309771 | 11.22363654  | 11.02840907 | 11.03923654 | 11.30492654 | 11.14623194 | 11.29420765 | 11.09811426 | 10.74178458 | 10.98114426 | 10.74178458 | 11.03323194 |
| HMGN1    | 11.35590005 | 11.41232579 | 11.46809039 | 11.02257592 | 11.2527592  | 11.29464214 | 10.96482182 | 11.05529291  | 10.96345717 | 10.86626238 | 10.96247298 | 11.30928363 | 11.57717931 | 11.04423271 | 11.00219602 | 11.21602620 | 10.97438668 | 11.01351162 |
| CLINT1   | 10.60433733 | 10.6493988  | 11.46443804 | 11.48418724 | 11.2891407  | 11.29534046 | 11.22854549 | 11.04828171  | 11.52409647 | 11.17995584 | 11.08665321 | 11.03066676 | 10.52214461 | 10.78464898 | 11.13269634 | 11.36381666 | 11.08224488 | 10.98829392 |
| EJF31    | 11.12568027 | 11.69460457 | 11.35698275 | 11.35698275 | 11.9312166  | 11.19263022 | 11.10780843 | 11.10780843  | 11.10780843 | 11.06788073 | 11.04775016 | 11.09837347 | 11.25505475 | 11.1173237  | 11.63022338 | 10.90249096 | 11.04203785 | 11.03038384 |
| PIM3     | 10.42668589 | 9.823748234 | 10.2953343  | 9.825776021 | 10.11353495 | 11.87338437 | 10.99748875 | 11.80849014  | 11.44072645 | 10.85017268 | 11.95834405 | 10.03843641 | 11.69246199 | 11.21554715 | 11.8603183  | 11.65880913 | 11.74066134 | 11.59550187 |
| ASB2     | 11.06418635 | 11.12575715 | 11.16885117 | 11.35862958 | 11.13582958 | 11.35820867 | 11.1077186  | 11.35820867  | 11.1077186  | 11.35820867 | 11.35820867 | 11.35820867 | 11.35820867 | 11.35820867 | 11.35820867 | 11.35820867 | 11.35820867 | 11.35820867 |
| FAM107B  | 10.52576642 | 10.74942147 | 10.25576642 | 10.74942147 | 10.8381611  | 11.06620125 | 10.88847584 | 11.80079784  | 11.06282775 | 10.12098162 | 12.19275644 | 10.91396235 | 11.1224005  | 11.14900093 | 11.30910015 | 11.55059094 | 11.35291361 | 11.99485838 |
| TMEM259  | 10.39198789 | 10.76800777 | 10.76800777 | 10.76800777 | 10.76800777 | 10.76800777 | 10.76800777 | 11.32942946  | 11.42028467 | 11.2428938  | 10.9655179  | 10.8517747  | 11.04668868 | 11.55223644 | 11.59921287 | 11.0712551  | 11.47771474 | 11.35899118 |
| TAPB1    | 10.95984592 | 11.75725034 | 10.68904087 | 11.33143424 | 11.38772397 | 11.52838606 | 11.0171974  | 11.03729218  | 10.88027948 | 11.62385179 | 11.7559433  | 11.88711014 | 11.03559823 | 11.09947522 | 11.08679145 | 10.84167852 |             |             |
| HP1B3    | 11.04925607 | 10.14667668 | 11.44033951 | 11.3490759  | 11.33665169 | 11.58610032 | 10.43278576 | 10.98236271  | 10.87349152 | 11.46528723 | 11.16508313 | 11.01390095 | 10.82792883 | 11.03166203 | 11.48201474 | 11.05046623 | 11.36197394 | 11.15114457 |
| TMEM1123 | 10.68928386 | 10.74672081 | 11.70983496 | 11.39613728 | 11.0675653  | 11.6231689  | 11.52855525 | 11.00101627  | 11.19900823 | 11.16443725 | 11.16826379 | 11.20648271 | 10.94147258 | 10.30439662 | 10.84519046 | 11.45351457 | 11.04663645 | 11.13335996 |
| TCEA1    | 10.89593194 | 11.37531421 | 11.29627279 | 11.3608717  | 11.4993305  | 11.28120176 | 10.93126441 | 10.91512756  | 11.33162705 | 11.0044876  | 11.24289444 | 11.35396759 | 10.97728661 | 11.06773933 | 10.98716632 | 11.30804203 | 11.02875363 | 11.04263514 |
| HIA-F    | 11.01841156 | 10.82929793 | 10.78437514 | 11.01841156 | 11.01841156 | 11.01841156 | 11.01841156 | 10.61637196  | 11.51922648 | 10.37831691 | 11.40596545 | 11.30270938 | 11.31062669 | 11.17676267 | 11.51639996 | 11.23175761 | 10.46281994 | 11.42013471 |
| ARL1     | 11.10311109 | 11.20029441 | 10.51638717 | 10.80645672 | 11.09875215 | 11.37888727 | 11.27992411 | 10.84261443  | 10.99650695 | 10.9996101  | 11.0947391  | 11.52062969 | 11.28869892 | 11.19777452 | 10.86190324 | 11.00548696 | 11.09846842 | 10.7983301  |
| ADAR     | 10.86441949 | 10.64027317 | 9.693514852 | 10.69234745 | 11.07976638 | 10.69445625 | 11.11931221 | 11.66091799  | 10.84952457 | 11.59283359 | 10.95947543 | 11.21007147 | 10.21617271 | 11.17418799 | 11.94148967 | 11.13862394 | 11.2811271  | 11.13190396 |
| PAPOLA   | 11.55737346 | 11.62335604 | 10.95611103 | 10.76788072 | 11.00868044 | 11.36867174 | 11.02529502 | 10.98993030  | 11.12258472 | 10.86707115 | 11.15193908 | 11.06381811 | 11.85782389 | 10.8658192  | 11.19928456 | 10.96528128 | 11.23500885 | 11.28490549 |
| TCF1     | 10.47891377 | 11.10138766 | 10.84949303 | 10.79057538 | 11.0110106  | 11.27425625 | 11.08080172 | 11.54938325  | 11.18999779 | 11.35392189 | 11.00165737 | 11.48838092 | 11.58168828 | 10.68474787 | 11.58728168 | 11.15834567 | 10.87446327 | 10.84905449 |
| PID3     | 11.03670351 | 11.21031982 | 11.52175278 | 10.95091128 | 11.45899637 | 11.29927252 | 11.0436301  | 10.84732072  | 11.70730131 | 11.11209512 | 11.54720175 | 11.86148896 | 11.93651283 | 11.1365739  | 10.7204161  | 10.70353218 | 11.08085466 |             |
| SIAH2    | 10.54153485 | 10.66826736 | 10.23319519 | 10.32687023 | 10.60372259 | 11.7930749  | 10.9465221  | 11.71925296  | 11.5291128  | 11.00677201 | 11.19742834 | 10.71108628 | 11.56368749 | 11.1727939  | 11.62732226 | 11.65193684 | 10.75798254 | 11.42088189 |
| LITAF    | 11.27195377 | 11.59854428 | 10.9669079  | 11.16187621 | 11.10259077 | 11.0552668  | 11.12590017 | 11.11392495  | 11.90401222 | 11.06265593 | 11.29922074 | 10.39817834 | 11.80638985 | 11.08661769 | 11.88736321 | 11.63494984 | 11.50210723 | 11.69614851 |
| ANXA7    | 10.98114522 | 11.43726212 | 11.6341588  | 11.37541133 | 11.7719826  | 11.1003447  | 11.02712613 | 11.41552485  | 10.80563271 | 11.14631859 | 10.91109959 | 11.60672332 | 11.40480633 | 10.75391867 | 11.07453883 | 10.72847574 | 10.84471004 |             |
| ANAPC16  | 11.17159829 | 11.07048814 | 11.55928525 | 11.19877162 | 11.30980231 | 11.2215726  | 11.39426548 | 11.4046338   | 11.05964911 | 11.59858877 | 11.9731532  | 11.41207644 | 11.14948651 | 11.0950237  | 10.75208768 | 10.90252244 | 10.35627979 | 10.86272145 |
| CSNK1A1  | 10.87445846 | 11.45571657 | 10.98773706 | 11.2389029  | 10.99031526 | 11.08951151 | 10.9157378  | 10.97349578  | 11.07734766 | 10.99284714 | 11.16882602 | 11.36537356 | 11.1924491  | 11.13895266 | 11.04014949 | 11.3096332  | 10.8747653  | 11.30802249 |
| SNRPB1   | 11.39213121 | 11.41693939 | 11.39213121 | 11.41693939 | 11.39213121 | 11.41693939 | 11.39213121 | 11.39213121  | 11.41693939 | 11.39213121 | 11.39213121 | 11.39213121 | 11.39213121 | 11.39213121 | 11.39213121 | 11.39213121 | 11.39213121 | 11.39213121 |
| GNVC     | 11.15257274 | 11.69785958 | 10.79047027 | 11.29463651 | 11.22863052 | 11.56087804 | 11.03721874 | 11.41340097  | 11.86171559 | 11.14552543 | 11.01753705 | 11.2144937  | 11.21544658 | 11.01406059 | 11.64512485 | 10.54027458 |             |             |
| FUCA2    | 11.19313633 | 11.0515548  | 11.22532123 | 11.24925564 | 11.04519104 | 11.40448037 | 11.43050818 | 11.10925046  | 10.84427713 | 10.83867367 | 10.94386813 | 11.19282611 | 11.45116305 | 11.63526567 | 10.9932201  | 10.72175403 | 10.51849546 | 11.04311773 |
| GARS     | 11.21919923 | 11.19246007 | 10.99228053 | 11.19565395 | 11.05970941 | 11.1255707  | 10.9709594  | 11.05709441  | 11.32881174 | 11.37979204 | 11.05965631 | 11.0976651  | 10.66509205 | 10.99268096 | 10.94315314 | 11.22982837 | 10.7337508  | 11.05575714 |
| TECP1    | 11.39373264 | 11.32716892 | 11.07811976 | 11.46238521 | 11.17163266 | 11.22479161 | 11.17163266 | 11.0499453   | 10.97076736 | 10.8897178  | 11.20842058 | 11.35307598 | 11.07531189 | 10.74274421 | 11.89505409 | 10.77994562 | 10.85533806 | 11.6330315  |
| TIFA     | 11.45041167 | 11.0712523  | 11.33889937 | 11.04938084 | 11.63611326 | 11.40136576 | 11.10080035 | 11.58811476  | 11.41200154 | 10.66617508 | 11.95613637 | 11.27359279 | 11.35806101 | 11.9366324  | 11.51201914 | 11.16643806 | 10.20838971 | 11.1573706  |
| SUN2     | 11.13654364 | 11.20126847 | 10.79060537 | 11.21396379 | 10.91440459 | 10.52848647 | 10.68716331 | 11.27341125  | 11.13532835 | 11.09310222 | 10.96404325 | 10.90285394 | 9.281169172 | 11.10547675 | 11.48887623 | 11.04966612 | 11.12235098 | 10.7412015  |
| SNRPB1   | 11.39213121 | 11.41693939 | 11.39213121 | 11.41693939 | 11.39213121 | 11.41693939 | 11.39213121 | 11.39213121  | 11.41693939 | 11.39213121 | 11.39213121 | 11.39213121 | 11.39213121 | 11.39213121 | 11.39213121 | 11.39213121 | 11.39213121 | 11.39213121 |
| RHB1     | 10.80530124 | 11.69785958 | 10.79047027 | 11.29463651 | 11.22863052 | 11.56087804 | 11.03721874 | 11.41340097  | 11.86171559 | 11.14552543 | 11.01753705 | 11.2144937  | 11.21544658 | 11.01406059 | 11.64512485 | 10.54027458 |             |             |
| PHPT1    | 11.00018806 | 11.23428633 | 11.33048658 | 10.77127759 | 11.3783584  | 11.0516944  | 11.16545723 | 10.89832128  | 10.78523039 | 10.67095281 | 10.881623   | 11.51659343 | 11.2436571  | 11.61077727 | 10.88699872 | 10.85018611 | 10.84030586 | 11.13906682 |
| COP5     | 11.01462339 | 11.07725529 | 11.0559965  | 11.17785478 | 11.15539662 | 11.7604139  | 11.6400419  | 11.10856823  | 10.65923172 | 10.92525737 | 11.40540011 | 11.57430554 | 11.54117208 | 10.93378887 | 10.96395756 | 10.96654143 | 10.95045393 |             |
| RS1D1    | 11.62982977 | 11.12026645 | 11.40680264 | 11.0645388  | 10.90413527 | 11.06315655 | 11.06773127 | 10.36316293  | 11.12799242 | 10.4620408  | 10.84937614 | 11.61482052 | 11.76917162 | 11.35809799 | 10.45787811 | 11.08276125 | 10.26935386 | 11.03176233 |
| RBM33    | 9.79997017  | 10.36961613 | 10.62115    | 9.46097233  | 11.06211524 | 11.06914612 | 10.84635857 | 11.148169813 | 11.1716498  | 11.59632668 | 10.36918101 | 11.37392071 | 10.49565144 | 11.57828882 | 10.97845815 | 11.13460412 | 11.10317619 |             |
| NRB1     | 11.3940223  | 10.93285267 | 11.41226373 | 11.35298674 | 10.7050975  | 10.95507943 | 11.14201901 | 10.94818945  | 11.03733865 | 11.08071315 | 11.59063275 | 11.14367765 | 10.80891784 | 11.74674097 | 10.9553714  | 11.23085881 | 11.12648319 | 11.02206266 |
| CLD      | 10.92149603 | 11.04980321 | 10.64757165 | 11.05954909 | 10.82784861 | 11.23552974 | 11.24888776 | 11.64957139  | 11.05918114 | 10.98584556 | 11.58472537 | 11.32591862 | 10.90985    |             |             |             |             |             |

|          |              |             |             |             |             |             |             |             |             |             |             |             |             |             |             |             |             |             |
|----------|--------------|-------------|-------------|-------------|-------------|-------------|-------------|-------------|-------------|-------------|-------------|-------------|-------------|-------------|-------------|-------------|-------------|-------------|
| PKGI     | 10.70612781  | 11.36829758 | 10.98561398 | 11.17267208 | 11.09218664 | 11.24822226 | 11.12890076 | 11.0709837  | 10.86591302 | 10.96238112 | 10.97672657 | 10.88895162 | 11.6026823  | 10.38284823 | 10.84283854 | 10.94466267 | 10.81630214 | 11.01018483 |
| SIAMF1   | 10.62599434  | 11.10338656 | 11.01290371 | 11.01290371 | 10.43003701 | 11.96002291 | 11.06226277 | 11.32755032 | 11.15705863 | 11.75815377 | 9.79443662  | 11.82616594 | 10.86590753 | 11.78786683 | 10.67264258 | 10.68296790 | 10.92475905 | 10.92475905 |
| SCARB2   | 11.13642884  | 10.89137257 | 10.88521203 | 11.12442891 | 10.58095253 | 10.56318425 | 11.23106683 | 11.1514274  | 11.34416548 | 11.62723584 | 10.63257694 | 11.05360748 | 10.72592821 | 10.72402709 | 10.91675107 | 10.72034567 | 10.72034567 | 10.72034567 |
| GF2F1    | 10.76369442  | 10.07306524 | 11.16047474 | 10.89147314 | 10.40089796 | 10.28665295 | 10.65580457 | 11.05171717 | 11.20519613 | 11.43072608 | 11.22493986 | 10.72459898 | 9.598387447 | 10.56683137 | 11.33276139 | 11.06446783 | 11.05219181 | 11.83072608 |
| TBL1R1   | 10.49323207  | 10.48545044 | 10.95752389 | 10.7885452  | 10.36732344 | 10.95074327 | 11.32666622 | 10.98014668 | 11.03651052 | 10.99146624 | 11.2931381  | 9.94737165  | 10.96523233 | 11.45902471 | 11.03691556 | 11.55843052 | 11.03691556 | 11.03691556 |
| CKorf1   | 10.36464359  | 10.64690974 | 10.64690974 | 10.74952469 | 10.74952469 | 10.74952469 | 10.74952469 | 10.74952469 | 10.74952469 | 10.74952469 | 10.74952469 | 10.74952469 | 10.74952469 | 10.74952469 | 10.74952469 | 10.74952469 | 10.74952469 | 10.74952469 |
| PLEK     | 10.75758611  | 10.9840899  | 11.2570712  | 10.82178704 | 10.96054484 | 11.3789904  | 10.58875391 | 10.4410224  | 11.14433289 | 10.7433397  | 11.45215483 | 10.98021328 | 11.26381419 | 9.45130643  | 10.58065411 | 11.16653992 | 10.58684527 | 11.30248858 |
| EF4A1    | 10.76104556  | 10.63915609 | 10.76334156 | 10.29063097 | 10.96054484 | 10.7801008  | 11.2521119  | 11.67400188 | 11.05958598 | 11.3080966  | 11.13235746 | 10.27554543 | 11.04469482 | 10.82509645 | 11.5737376  | 10.9604815  | 11.53558363 | 10.9718195  |
| OKR1     | 10.73452747  | 10.73171717 | 10.91626031 | 10.3755313  | 11.19095841 | 10.86045115 | 11.16451292 | 10.80905598 | 11.09873142 | 10.51637697 | 11.06746075 | 10.5694679  | 11.06744131 | 11.56206524 | 11.1824558  | 11.23921249 | 11.1016348  | 10.77845267 |
| PTPN6    | 11.3017237   | 11.3831621  | 11.3575952  | 11.36632492 | 11.05295204 | 11.25697637 | 10.68252833 | 10.91985689 | 11.0688626  | 10.51371214 | 10.89541768 | 10.9469996  | 11.02223915 | 11.08713321 | 9.90458655  | 10.51453254 | 10.48549313 | 11.08178909 |
| BTN3A1   | 11.61233786  | 10.40665836 | 10.41484481 | 10.19991638 | 10.73470755 | 10.94113573 | 11.52077448 | 10.665153   | 11.25453098 | 11.19014313 | 10.98518094 | 11.34549614 | 10.83979414 | 10.87745335 | 10.60542493 | 11.36668389 | 10.9017279  | 10.9017279  |
| WFS1     | 10.07756774  | 10.43768362 | 11.09684139 | 11.4511809  | 10.84537628 | 11.62302968 | 10.65546013 | 11.1182371  | 10.99292381 | 11.13193347 | 10.65882564 | 10.24955405 | 11.51170351 | 10.95612717 | 11.28644324 | 10.77289727 | 10.60186504 | 10.60186504 |
| NDUFB11  | 10.95723797  | 11.18580039 | 10.90076394 | 11.2584684  | 11.29575677 | 11.10714911 | 10.58103719 | 10.5062486  | 10.96794736 | 11.20353361 | 10.90722527 | 11.94436607 | 10.1354829  | 10.3771197  | 10.29138077 | 10.61360383 | 10.61360383 | 10.61360383 |
| DPAK21   | 11.15461005  | 10.46125121 | 11.23125827 | 10.87348538 | 11.30578334 | 11.40953838 | 11.41144199 | 10.56367598 | 10.96451204 | 10.83104976 | 10.97911062 | 11.28601329 | 10.81282393 | 11.63775732 | 10.90789376 | 10.96068665 | 10.52854299 | 10.6957495  |
| ANKRA1P1 | 11.103417289 | 11.10294524 | 11.3413761  | 10.98805553 | 11.30674477 | 11.08558669 | 11.13540015 | 10.61004828 | 10.78496599 | 10.89098784 | 10.68798735 | 11.42303103 | 11.56505701 | 11.50104305 | 10.55286937 | 10.52200175 | 10.44294918 | 11.8712502  |
| EID1     | 10.94333645  | 11.21077139 | 10.97935763 | 11.19034129 | 11.23618269 | 10.74900321 | 10.94267072 | 10.48335844 | 11.00527024 | 10.28733686 | 10.71945637 | 11.14596551 | 11.06606844 | 10.97680042 | 10.38765475 | 10.97649035 | 10.51102216 | 10.47379257 |
| ARHGAP45 | 11.20700303  | 10.67435166 | 11.150251   | 11.07455265 | 11.06384971 | 10.59968748 | 10.8846787  | 10.71572887 | 11.28563069 | 10.68416346 | 10.98600381 | 10.9240097  | 11.2567375  | 11.14241029 | 11.00712254 | 11.3005587  | 10.52215033 | 10.52215033 |
| ARPC3    | 11.1623343   | 11.32577215 | 11.00951933 | 11.11341228 | 10.89411693 | 11.02544273 | 10.93278669 | 10.7032964  | 10.80791311 | 10.6453367  | 10.95376686 | 10.87818279 | 11.24049521 | 11.39664809 | 10.4924916  | 11.66995893 | 10.80673936 | 11.05426098 |
| EF2A     | 10.10657248  | 11.16515749 | 10.90758453 | 11.2571137  | 10.98065237 | 11.117834   | 10.45106355 | 10.79593914 | 11.15331078 | 10.79288022 | 10.92834879 | 10.4569625  | 10.73861129 | 11.39062989 | 10.92043092 | 11.06690328 | 10.97880192 | 10.97880192 |
| TPH5     | 10.72313362  | 11.39516817 | 11.39723799 | 11.02675772 | 11.20675772 | 10.9648386  | 10.84273734 | 10.9090571  | 10.72903678 | 10.880952   | 11.05851704 | 11.0671242  | 10.64387449 | 11.07368773 | 10.9468503  | 10.36363845 | 11.39462357 | 11.39462357 |
| ATP5F1   | 10.90663534  | 11.07317541 | 11.15204156 | 11.5364727  | 11.05394699 | 11.08846116 | 10.55370932 | 10.94779721 | 10.67418925 | 11.02888648 | 10.91108359 | 11.07899546 | 11.13487333 | 10.70899546 | 11.13487333 | 10.85289115 | 10.7934491  | 11.06936552 |
| SLC17A9  | 11.05712907  | 10.93137214 | 11.02681176 | 10.93811434 | 10.83595655 | 10.76756073 | 11.36313614 | 10.68734095 | 11.3972604  | 10.57553537 | 11.01893789 | 11.32263134 | 10.96188005 | 11.59114406 | 10.78982779 | 11.40724795 | 11.04724795 | 11.04724795 |
| G8P2     | 10.53639421  | 10.67194261 | 10.47247616 | 10.8679711  | 11.78892953 | 10.68523223 | 10.93928777 | 10.99965737 | 11.11658409 | 11.08062568 | 11.44095481 | 10.65330359 | 11.23582442 | 10.76900509 | 11.02080047 | 11.19906833 | 10.95843874 | 11.15285962 |
| TM6C     | 11.13793685  | 11.54227402 | 11.24516309 | 11.51891813 | 10.62926675 | 10.65797473 | 10.25362935 | 11.46184877 | 11.01350801 | 11.41403999 | 10.89123787 | 11.20847323 | 9.70009058  | 9.42089523  | 10.44592199 | 10.78690183 | 10.64408989 | 10.64408989 |
| SCFD1    | 10.89608729  | 10.79696627 | 11.18585112 | 11.07316116 | 11.20391939 | 11.12746431 | 10.59120991 | 10.98241822 | 10.89937607 | 10.8369571  | 10.79025541 | 10.96151691 | 11.41547566 | 11.5649411  | 10.90134116 | 11.160371   | 10.93120205 | 10.77289474 |
| RAN      | 10.58997276  | 10.94229001 | 10.72570001 | 10.62713493 | 11.67626117 | 11.3218474  | 10.99966716 | 10.9462722  | 10.4500311  | 11.1122778  | 11.12710791 | 11.14340955 | 11.14028671 | 10.85021694 | 10.78414293 | 10.69664207 | 11.15288065 | 11.15288065 |
| KMT2E    | 11.05521511  | 11.16714938 | 11.16230011 | 10.7521759  | 10.45028742 | 10.70353299 | 10.63565844 | 11.22632328 | 11.0153507  | 10.87331736 | 10.82652821 | 10.6906226  | 10.3815349  | 11.00987111 | 11.36662352 | 11.26784708 | 11.05401484 | 11.06439666 |
| TM6B     | 10.98292387  | 11.08532983 | 11.08532983 | 11.08532983 | 11.08532983 | 11.08532983 | 11.08532983 | 11.08532983 | 11.08532983 | 11.08532983 | 11.08532983 | 11.08532983 | 11.08532983 | 11.08532983 | 11.08532983 | 11.08532983 | 11.08532983 | 11.08532983 |
| UCR9B    | 10.89629398  | 11.14125637 | 11.14125637 | 11.14125637 | 11.14125637 | 11.14125637 | 11.14125637 | 11.14125637 | 11.14125637 | 11.14125637 | 11.14125637 | 11.14125637 | 11.14125637 | 11.14125637 | 11.14125637 | 11.14125637 | 11.14125637 | 11.14125637 |
| NEF2L1   | 10.85851416  | 10.86880504 | 10.84928958 | 11.26140683 | 11.16808366 | 11.1177742  | 11.27418061 | 10.80276917 | 11.08181807 | 10.697962   | 11.16683416 | 11.16901557 | 11.34152841 | 11.07705196 | 10.63277651 | 11.00218399 | 10.56475139 | 10.7464261  |
| NBP2L2   | 10.60157413  | 10.60157413 | 10.98108208 | 11.04751426 | 11.10216611 | 10.54293949 | 10.88920605 | 11.03302314 | 11.03302314 | 11.2410677  | 10.58377101 | 10.3297219  | 9.78360466  | 11.2341185  | 11.1356774  | 11.39179877 | 11.00078223 | 11.00078223 |
| KTN1     | 10.23702510  | 10.96035306 | 10.96035306 | 10.68249882 | 11.02335146 | 11.0772017  | 10.67369864 | 10.75719768 | 10.9968933  | 10.64874196 | 11.05328684 | 11.03911689 | 10.28761154 | 11.42946637 | 10.88373841 | 10.9486418  | 10.7682727  | 11.6593029  |
| FDPS     | 10.97378318  | 11.39314208 | 11.33870555 | 11.33870555 | 10.97147073 | 11.10123328 | 10.63207987 | 10.61961725 | 10.83005963 | 10.47460751 | 10.89393968 | 10.84661382 | 11.41633545 | 11.32395386 | 10.59606501 | 10.88343287 | 10.56889148 | 10.976076   |
| GPPT1    | 10.99036783  | 9.85711745  | 10.10447004 | 11.14234272 | 10.57751698 | 11.23148064 | 11.74003996 | 11.04334961 | 11.35879538 | 11.11712526 | 11.57746608 | 10.31323035 | 10.18279559 | 10.47561121 | 11.28102294 | 11.45434688 | 11.08213833 | 11.58562311 |
| ITGA5    | 10.48421362  | 11.06256781 | 10.84100033 | 11.18212179 | 10.9019827  | 11.08867554 | 11.46528108 | 10.52977372 | 11.20382923 | 11.05926423 | 10.9529988  | 11.7108551  | 11.59297005 | 11.35094808 | 10.48413773 | 11.54841147 | 11.08818165 | 11.49126233 |
| RBM4A    | 11.05528284  | 11.19164119 | 11.02180408 | 11.19258008 | 11.22779706 | 10.83986556 | 10.62806755 | 11.23973204 | 10.62806755 | 11.23973204 | 10.68512266 | 11.23973204 | 11.52514489 | 11.1150576  | 11.52729371 | 10.34220077 | 10.70064025 | 10.70064025 |
| CCM2     | 11.22504705  | 11.83044836 | 11.59567792 | 11.41034036 | 11.04453718 | 11.17088731 | 10.79404937 | 10.64306372 | 10.90404432 | 10.75085755 | 10.83299937 | 10.95257698 | 11.2269383  | 11.16506496 | 10.60348244 | 11.33996118 | 10.76199299 | 10.36252557 |
| RAB10    | 10.23293948  | 10.76695489 | 10.98460592 | 11.37350881 | 10.98460592 | 11.28606788 | 10.97597371 | 11.05224621 | 10.95010091 | 11.05224621 | 11.05224621 | 11.05224621 | 11.05224621 | 11.05224621 | 11.05224621 | 11.05224621 | 11.05224621 | 11.05224621 |
| FGI2     | 10.95520086  | 9.421649842 | 10.25684805 | 10.90835368 | 10.25512923 | 11.57833834 | 10.94187713 | 11.90842026 | 10.80064467 | 10.10825943 | 11.45031705 | 10.68221115 | 11.71275203 | 11.10673386 | 11.2230369  | 11.2035728  | 10.57248615 | 11.62749731 |
| TA7F     | 11.01008041  | 10.90251632 | 11.04898117 | 11.09800648 | 10.90056427 | 11.01810376 | 11.02439893 | 11.06403592 | 11.16177477 | 10.85091858 | 10.74623964 | 11.06122073 | 10.7553442  | 10.83357445 | 10.59051557 | 10.81923511 | 10.82956823 | 11.07514238 |
| SLC35F2  | 11.04295636  | 11.41127248 | 11.08788573 | 11.41127248 | 11.08788573 | 11.08788573 | 11.08788573 | 11.08788573 | 11.08788573 | 11.08788573 | 11.08788573 | 11.08788573 | 11.08788573 | 11.08788573 | 11.08788573 | 11.08788573 | 11.08788573 | 11.08788573 |
| ITGA6    | 10.36606619  | 10.96831874 | 11.19446603 | 10.93810749 | 11.0420712  |             |             |             |             |             |             |             |             |             |             |             |             |             |



|          |             |              |             |             |             |             |             |              |              |             |             |             |             |             |             |             |             |              |
|----------|-------------|--------------|-------------|-------------|-------------|-------------|-------------|--------------|--------------|-------------|-------------|-------------|-------------|-------------|-------------|-------------|-------------|--------------|
| SSU72    | 11.2730415  | 11.22897713  | 10.92536368 | 10.9554933  | 10.76839071 | 10.67641242 | 10.75773668 | 10.23630779  | 10.45422876  | 10.3524268  | 10.51698009 | 10.81667185 | 11.08379407 | 10.89786566 | 9.979812738 | 10.19081854 | 10.09229818 | 10.46722413  |
| TMEM39A  | 10.22819327 | 10.69275279  | 10.69380298 | 10.46918333 | 10.94597195 | 11.22604980 | 10.93600061 | 10.47885293  | 10.958027    | 10.7904003  | 11.04693195 | 11.11321329 | 10.83975588 | 10.0121244  | 10.4146166  | 10.73106952 | 10.68261072 | 10.55922167  |
| PP2R1A   | 10.54083709 | 10.86172803  | 11.03716478 | 10.36534889 | 10.89679524 | 10.63802629 | 10.62942832 | 10.3458409   | 10.92057906  | 10.6031816  | 11.02635209 | 11.22526501 | 10.58319578 | 11.03170837 | 10.78616067 | 10.60835369 | 10.33927849 | 11.04880895  |
| SHG182   | 11.18118486 | 10.73664444  | 10.79501674 | 10.92967299 | 10.97228421 | 10.8637572  | 10.58630993 | 10.31625462  | 10.49724513  | 10.41079064 | 10.4885477  | 10.9580992  | 11.30320338 | 10.97192836 | 10.44894389 | 10.37636762 | 10.68487593 | 10.32617807  |
| LAMP1    | 10.86213463 | 11.09474562  | 10.13751666 | 10.38115114 | 10.48664664 | 10.60475476 | 10.76382356 | 10.48684651  | 10.60475476  | 10.76382356 | 10.48684651 | 10.60475476 | 10.76382356 | 10.48684651 | 10.60475476 | 10.76382356 | 10.48684651 | 10.60475476  |
| CDC47    | 10.25956464 | 10.76452236  | 10.70284929 | 10.70794153 | 10.82682392 | 10.60841036 | 10.43286106 | 10.71825996  | 10.45142618  | 10.71825996 | 10.45142618 | 10.71825996 | 10.45142618 | 10.71825996 | 10.45142618 | 10.71825996 | 10.45142618 | 10.71825996  |
| SVAP1    | 9.68616251  | 10.12511134  | 10.39206912 | 10.40679395 | 10.28528326 | 10.85399064 | 10.43806043 | 10.96822443  | 10.55788371  | 10.89501662 | 11.57278371 | 10.26828311 | 10.96848766 | 0.23341959  | 11.1935667  | 11.15647707 | 11.6367055  | 11.0522020   |
| LDR      | 10.66641778 | 11.47386178  | 11.05732918 | 11.43881275 | 10.24582406 | 10.9706156  | 10.1201667  | 10.81219237  | 10.81245151  | 10.30570209 | 10.59325108 | 10.66974125 | 11.58631673 | 10.66974125 | 11.58631673 | 10.66974125 | 11.58631673 | 10.66974125  |
| RAC1     | 10.37984881 | 10.75656236  | 11.06399181 | 10.70270076 | 11.06258285 | 11.18653605 | 10.7953708  | 10.74769934  | 10.79066001  | 10.49832971 | 10.70214774 | 10.2207559  | 10.79806391 | 10.5215341  | 10.53435204 | 10.41975262 | 10.3632383  | 10.73429573  |
| TMEM179B | 10.89433636 | 11.20650345  | 10.74276304 | 10.12650345 | 10.26589103 | 10.90607572 | 10.52874953 | 10.34470976  | 10.51257865  | 11.16315477 | 11.34132403 | 10.26589103 | 10.90679873 | 10.29809943 | 10.34738765 | 10.1831328  | 10.42397074 | 10.87439704  |
| CREB3    | 11.02241571 | 10.24751331  | 10.69029281 | 10.12029281 | 10.68089781 | 11.18913378 | 10.24751331 | 10.7041831   | 10.24751331  | 10.7041831  | 10.24751331 | 10.7041831  | 10.24751331 | 10.7041831  | 10.24751331 | 10.7041831  | 10.24751331 | 10.7041831   |
| BACH1    | 10.42957261 | 9.16930855   | 10.73505561 | 10.2324761  | 10.329491   | 10.8852055  | 10.42807996 | 11.33444692  | 11.42106747  | 10.2501805  | 11.90437941 | 10.3752539  | 11.05745331 | 9.37145194  | 11.3665437  | 11.85537885 | 10.79179111 | 10.78535999  |
| MLL2A    | 10.72892807 | 10.73637087  | 10.93448914 | 10.6790509  | 10.89926237 | 10.65515594 | 10.08302817 | 10.812386346 | 10.22210744  | 11.11067424 | 11.28994265 | 10.7200112  | 10.0359773  | 10.7119598  | 10.04686206 | 10.79151449 |             |              |
| DISP22   | 11.03945884 | 10.9104988   | 10.67459946 | 10.9832887  | 10.94412935 | 10.76746478 | 10.14134246 | 10.38963856  | 10.1382026   | 10.50423803 | 10.65503709 | 10.79192115 | 11.08537966 | 9.86957155  | 10.21947092 | 10.71444188 | 10.56321976 | 10.13864633  |
| AIOX5    | 10.67504782 | 10.86138131  | 10.91655236 | 11.28001185 | 10.9707303  | 10.7944034  | 10.54475814 | 10.10282543  | 10.7180934   | 10.87592462 | 10.67109188 | 9.80044591  | 10.66529479 | 10.39755278 | 10.71231064 | 10.45530603 | 10.34957977 | 9.95087553   |
| BLOC15B  | 10.4126794  | 10.51697692  | 10.58863225 | 10.67116966 | 10.58631272 | 10.39740004 | 10.33486206 | 11.21204447  | 10.83610221  | 11.25990747 | 10.85430414 | 10.82084272 | 10.6666244  | 10.45407378 | 10.78989796 | 11.1746744  | 11.22371186 | 10.71974531  |
| MBNL1    | 10.71459664 | 10.45918233  | 10.48433682 | 10.66531978 | 10.59206877 | 10.68820317 | 10.0465891  | 10.81581469  | 10.90465891  | 10.68779092 | 11.13320254 | 10.2777958  | 9.776353485 | 10.20751153 | 10.69236467 | 11.19063062 | 10.48022416 | 10.07825758  |
| RNP51    | 11.08454338 | 10.50129417  | 11.23916405 | 11.15888588 | 11.0701342  | 10.61047716 | 11.02962915 | 10.56294787  | 10.72899218  | 10.4803696  | 10.19677777 | 11.53722417 | 10.83655845 | 10.58267182 | 10.54789820 | 10.64520286 | 10.51600599 | 10.76089524  |
| CB39     | 10.40183047 | 10.41785799  | 11.18582799 | 10.3866966  | 10.1064144  | 10.5051914  | 10.6772157  | 10.62575606  | 10.91911     | 10.80164087 | 10.69622543 | 10.47786247 | 9.749025491 | 11.18913185 | 10.8814236  | 10.93554361 | 10.65601054 | 10.8236923   |
| SC3B3A   | 10.54714869 | 11.15012554  | 10.73555043 | 10.98403407 | 10.63725208 | 10.10116622 | 10.93585979 | 10.47968208  | 10.2688214   | 10.73941058 | 10.78170661 | 10.74029229 | 10.87976348 | 10.87832048 | 10.51978495 | 10.40665998 | 11.3893958  | 10.50634567  |
| FNBP1    | 10.44212903 | 10.22599422  | 10.58555987 | 10.78019636 | 10.74425204 | 10.49854546 | 11.7555275  | 10.49854546  | 10.41796469  | 10.7412926  | 10.56389251 | 11.2849146  | 11.44925922 | 11.2244142  | 11.14762382 | 10.89350588 | 10.72805309 |              |
| PAIP2B   | 11.42803154 | 11.06641006  | 10.90711175 | 11.19356611 | 11.07524979 | 10.45069021 | 11.29373    | 10.69028013  | 11.03278593  | 10.9358513  | 10.67445285 | 10.31751647 | 10.57286874 | 11.0122962  | 10.52016729 | 10.5187393  | 10.9075342  | 10.91075347  |
| SNRPD2   | 10.70829226 | 11.18948014  | 11.03306789 | 10.65894431 | 10.71948302 | 10.78982455 | 10.75174509 | 10.0867489   | 10.47597406  | 10.0848332  | 10.38255835 | 10.893197   | 10.85715779 | 10.77767426 | 10.80982232 | 10.07776352 | 10.26347601 | 10.43990489  |
| NXF1     | 10.68370401 | 10.6882082   | 10.97045151 | 10.62304407 | 10.97045151 | 10.3549112  | 11.6290277  | 10.67195198  | 11.1051957   | 10.52091526 | 9.90014067  | 10.4099366  | 9.90092537  | 11.3821283  | 10.6773874  | 10.9209135  | 10.7402627  |              |
| PDE4D1   | 10.36990876 | 10.67382588  | 10.85741219 | 11.1798605  | 11.25365405 | 8.193782447 | 10.43095559 | 10.71807842  | 10.5454307   | 10.8645137  | 10.45864644 | 10.4948007  | 11.17393938 | 9.897518302 | 10.69125414 | 10.83456688 | 11.01680378 | 10.62462967  |
| CtIF50   | 10.76175539 | 10.73923019  | 10.72416225 | 10.71214225 | 10.83179941 | 10.68691554 | 10.76490093 | 9.663700909  | 10.5313749   | 9.96893229  | 10.1208031  | 10.67639468 | 10.83200732 | 10.99537675 | 9.598418557 | 10.2139736  | 10.0744862  | 9.94099463   |
| Dep-07   | 10.7715778  | 10.84874996  | 10.79986462 | 10.79467802 | 10.88450268 | 9.677586789 | 11.36161431 | 10.42821318  | 10.58666318  | 10.36538402 | 10.45671957 | 10.48037143 | 10.41339597 | 10.92197773 | 10.25176878 | 10.92744290 | 10.8355532  | 10.74441331  |
| TNKL1    | 10.39520307 | 10.39520307  | 10.39520307 | 10.39520307 | 10.39520307 | 10.39520307 | 10.39520307 | 10.39520307  | 10.39520307  | 10.39520307 | 10.39520307 | 10.39520307 | 10.39520307 | 10.39520307 | 10.39520307 | 10.39520307 | 10.39520307 | 10.39520307  |
| WHSC11L  | 9.60511544  | 9.91488959   | 10.5628481  | 10.4853388  | 10.09738851 | 10.7541623  | 10.50132703 | 10.6348722   | 10.9755712   | 10.8315194  | 11.44869509 | 10.70338414 | 11.02095029 | 10.61702419 | 10.74387439 | 11.04673994 | 10.7211469  | 11.18965621  |
| RABGAP1L | 10.73068957 | 10.57777853  | 11.14765709 | 11.09587998 | 10.37291336 | 9.94067909  | 10.28131055 | 10.57739378  | 10.65418731  | 10.87661968 | 10.6107016  | 11.08193836 | 10.70177417 | 10.74552644 | 10.5117462  | 10.58103122 | 10.92573627 | 10.71145219  |
| SET      | 10.72778864 | 10.68617984  | 10.68617984 | 10.83101972 | 10.67618522 | 10.5489951  | 10.83408791 | 10.58601272  | 10.83408791  | 10.58602606 | 10.67369064 | 11.06189207 | 10.7309242  | 10.67538866 | 10.36231562 | 10.86047162 | 10.6001248  | 10.721236425 |
| CERCAM   | 10.49264063 | 10.48366641  | 10.73419775 | 10.45141621 | 10.9333133  | 10.02415282 | 10.77020906 | 10.57601415  | 10.66472162  | 10.68274048 | 10.47394782 | 10.8111174  | 10.32811771 | 10.65408503 | 10.73206134 | 10.68661609 | 10.7354721  | 10.87216795  |
| NUDFA3   | 10.8451497  | 10.80129396  | 10.49128357 | 10.47245047 | 10.0855311  | 11.01342894 | 10.67173512 | 10.14977874  | 10.6740869   | 10.64038184 | 10.50744147 | 10.78663573 | 11.51472113 | 10.81689348 | 10.2070722  | 10.59878327 | 10.27374295 | 10.30357006  |
| E2F4KA   | 10.52651168 | 10.21621912  | 10.68114567 | 10.91843162 | 9.826264143 | 10.73665991 | 11.14168892 | 11.19109222  | 10.61730092  | 11.05369108 | 11.21621634 | 10.3978668  | 10.23652829 | 10.87101568 | 11.08802198 | 10.53259141 | 10.7953204  | 10.66222498  |
| PPP      | 10.44135224 | 10.79488345  | 10.44135224 | 10.44135224 | 10.44135224 | 10.44135224 | 10.44135224 | 10.44135224  | 10.44135224  | 10.44135224 | 10.44135224 | 10.44135224 | 10.44135224 | 10.44135224 | 10.44135224 | 10.44135224 | 10.44135224 | 10.44135224  |
| ARH2     | 10.58529996 | 10.69237552  | 10.71493276 | 10.68237552 | 10.71493276 | 10.68237552 | 10.71493276 | 10.68237552  | 10.71493276  | 10.68237552 | 10.71493276 | 10.68237552 | 10.71493276 | 10.68237552 | 10.71493276 | 10.68237552 | 10.71493276 | 10.68237552  |
| Cl1o31F  | 10.86046819 | 11.13819901  | 10.69041033 | 10.7066793  | 10.64185012 | 10.86041146 | 10.73349575 | 10.0531042   | 10.57101634  | 10.1832814  | 10.26681948 | 11.00173382 | 10.90517912 | 11.0060639  | 9.980091268 | 10.51054892 | 10.50351728 | 10.3839259   |
| TXND12   | 11.08087449 | 10.8508378   | 10.8508378  | 10.94091102 | 10.74062227 | 11.12623523 | 11.61709657 | 10.94057788  | 10.4830071   | 10.6001848  | 10.69019337 | 11.0993782  | 10.98787512 | 9.94190595  | 10.28518491 | 10.0796509  | 10.38462873 |              |
| SAR1A    | 9.921124892 | 10.39865233  | 10.10288968 | 10.4323179  | 10.39469013 | 10.61814577 | 11.10859033 | 10.93225594  | 10.7314099   | 10.87290056 | 11.00046402 | 10.70227637 | 9.988504776 | 10.59315963 | 10.63456672 | 10.76804419 | 11.0364468  | 10.8223571   |
| CXCC5    | 11.35921889 | 11.76356384  | 11.2430997  | 10.76356384 | 11.2430997  | 10.9678589  | 10.6645218  | 10.67217934  | 10.43981802  | 10.610383   | 10.58610664 | 10.97555407 | 10.54961045 | 10.40713243 | 10.12509693 | 9.988575254 | 10.3454611  |              |
| DDIT3    | 11.68959173 | 11.578911374 | 10.8561721  | 10.57607949 | 11.01316518 | 10.48005675 | 10.3249646  | 10.67676713  | 10.988025463 | 10.43969663 | 10.94396522 | 10.66161719 | 10.67179699 | 10.26796311 | 10.5793206  | 10.3034445  | 10.0654312  |              |
| IRF9     | 10.24528701 | 10.38166446  | 9.988661124 | 10.75004134 | 10.49135802 | 10.53907897 | 10.70572945 | 10.1578454   | 10.9844068   | 10.43950569 | 10.93625217 | 10.58612114 | 11.05053778 | 10.72518    |             |             |             |              |

|          |             |             |             |             |             |             |             |              |             |             |              |             |             |             |             |             |              |             |
|----------|-------------|-------------|-------------|-------------|-------------|-------------|-------------|--------------|-------------|-------------|--------------|-------------|-------------|-------------|-------------|-------------|--------------|-------------|
| PPRF40A  | 10.1264663  | 9.808517688 | 10.68839485 | 10.0476095  | 10.12231877 | 11.22925973 | 10.7150109  | 10.3883985   | 10.85415198 | 10.66721952 | 10.69974934  | 10.62123461 | 10.17345775 | 9.504684991 | 10.58373594 | 10.67482268 | 10.50994157  | 10.6748817  |
| SVTL1    | 10.8730456  | 10.53957651 | 10.86786604 | 10.87848619 | 10.78252248 | 10.44045711 | 10.14761709 | 10.87887198  | 10.56929953 | 10.83163529 | 10.6089825   | 10.4888111  | 10.59492212 | 10.79063569 | 10.59025607 | 10.45811723 | 10.99828848  | 10.47799042 |
| CCDC88C  | 10.08753147 | 10.50421629 | 10.56636371 | 10.59784875 | 10.36202059 | 10.107523   | 10.22032038 | 10.11193971  | 10.24438957 | 10.83657817 | 10.60524795  | 10.20890822 | 10.17407284 | 10.99291065 | 10.12738797 | 10.68961729 | 10.118920314 | 10.10380894 |
| Clor3f   | 10.7928368  | 10.95683599 | 10.59763203 | 10.25225808 | 10.49623487 | 10.66362871 | 10.80475687 | 10.01927333  | 10.3471882  | 10.60204864 | 10.54153807  | 10.70364532 | 10.77425236 | 10.81927024 | 10.14244005 | 10.65816244 | 10.4251535   | 10.43883856 |
| LRK11    | 10.65938361 | 10.72730791 | 10.26109654 | 10.62108653 | 10.56314143 | 10.24117826 | 10.87219235 | 10.24117826  | 10.24117826 | 10.24117826 | 10.7451209   | 11.09261178 | 10.51052325 | 10.17266697 | 10.70072623 | 10.15947233 | 10.45877857  | 10.57142051 |
| CS25A2   | 10.66425501 | 10.61398985 | 10.67313841 | 10.67103889 | 11.02359302 | 11.14221139 | 10.51668447 | 10.12692767  | 10.51668447 | 10.61066264 | 10.61066264  | 10.12692767 | 10.12692767 | 10.12692767 | 10.12692767 | 10.12692767 | 10.12692767  | 10.12692767 |
| DOCK2    | 9.870620187 | 10.44642487 | 10.20372054 | 10.63760235 | 10.17026355 | 11.10320397 | 9.80230783  | 10.67379331  | 10.55936702 | 10.73848062 | 10.18695735  | 10.85291013 | 11.14799866 | 10.01782444 | 11.23487946 | 10.95827946 | 10.93488852  | 10.38006562 |
| MSN      | 10.47727461 | 10.26621552 | 10.24326171 | 10.24326171 | 10.2662312  | 10.42524694 | 10.8066304  | 10.92020614  | 10.57828359 | 11.18473746 | 10.38440746  | 10.1272089  | 10.01848235 | 11.08405063 | 11.20195345 | 10.71649923 | 10.0208947   | 10.69028947 |
| TCB2     | 10.82394043 | 10.96000666 | 10.80427631 | 10.5558768  | 10.75867134 | 11.08010666 | 10.87194034 | 10.42223236  | 10.43389056 | 10.249447   | 10.59951339  | 10.65728986 | 10.47222486 | 10.84787249 | 10.18724367 | 10.30222182 | 10.44909575  | 10.59081127 |
| KRT10    | 10.65178285 | 10.57541071 | 10.85945213 | 10.51201214 | 10.17958145 | 10.59646144 | 10.53120124 | 10.17958145  | 10.59646144 | 10.59322691 | 10.53170477  | 10.78048841 | 10.84728909 | 10.07734156 | 10.48159916 | 10.56279714 | 10.42602784  | 10.42602784 |
| RBMS     | 10.55762563 | 10.60837225 | 10.80725763 | 10.78025424 | 10.75664763 | 9.88514323  | 10.47908922 | 10.5524087   | 10.76024217 | 9.954168304 | 10.01293313  | 10.75374676 | 10.44535085 | 10.84088889 | 10.47125528 | 10.78491956 | 10.6902826   | 10.6902826  |
| PCNP     | 10.49987208 | 10.62850374 | 10.65835114 | 10.23265866 | 10.61126939 | 11.23996756 | 10.14052807 | 10.2482067   | 10.58465209 | 10.27629872 | 10.57638951  | 10.72075878 | 10.67713306 | 11.23971615 | 10.3637405  | 10.67207798 | 10.29939289  | 10.68539523 |
| ADH18A1  | 10.51777032 | 10.26420347 | 10.81948374 | 10.7235148  | 10.56601503 | 10.27282208 | 10.55055062 | 10.55055062  | 10.55055062 | 10.73787448 | 11.11751083  | 10.42066407 | 10.12580762 | 10.75183131 | 10.65080427 | 10.50172367 | 10.97405977  | 10.97405977 |
| PCP11    | 10.7460765  | 11.14087033 | 10.89702592 | 10.38430801 | 10.95786322 | 10.6241006  | 10.44190437 | 10.57718378  | 10.72380795 | 10.11288514 | 10.59256562  | 10.34058349 | 10.86559083 | 10.37447848 | 10.36917938 | 10.70496687 | 10.2172435   | 10.40349011 |
| TMED7    | 10.50255605 | 11.00566681 | 10.31112838 | 10.02923953 | 10.88157157 | 10.50419076 | 10.46645374 | 10.9987214   | 10.2631095  | 10.97543636 | 11.13761636  | 10.66519304 | 10.42418298 | 10.25946234 | 11.13927305 | 10.7328319  | 10.43159498  | 10.43159498 |
| SRI      | 10.61758985 | 10.83628004 | 10.95213212 | 10.54721497 | 10.84762368 | 10.9667809  | 10.54997784 | 9.748887806  | 10.62413618 | 10.79880206 | 10.336314    | 10.86649318 | 10.93190361 | 10.28549931 | 9.66441664  | 9.951101642 | 9.841155661  | 10.6953221  |
| AP351    | 10.7846575  | 10.64231059 | 10.99512669 | 11.1331192  | 10.95860572 | 11.16631381 | 10.52103066 | 10.59344809  | 10.61413345 | 10.51613345 | 10.5738963   | 10.43755168 | 10.30618468 | 11.06340281 | 9.8477598   | 10.18345256 | 10.23305211  | 10.13421271 |
| PTPN2    | 10.41932938 | 11.1047591  | 10.18566709 | 11.19667233 | 10.67996628 | 10.59821999 | 10.66574015 | 10.49196712  | 10.78904653 | 10.56882799 | 10.86390208  | 10.50467285 | 11.25429226 | 10.50119908 | 10.15695619 | 10.55232355 | 10.64522981  | 10.47642265 |
| CDY9B    | 10.90521386 | 10.75569671 | 10.75316933 | 10.88557202 | 11.02264419 | 10.65450888 | 10.08801543 | 10.61134112  | 10.15728335 | 10.08081543 | 10.21571933  | 10.6576663  | 10.75588371 | 10.94620506 | 9.94905899  | 10.15652727 | 10.2063255   | 9.96638005  |
| ACTR2    | 10.19618647 | 10.76524862 | 10.38621384 | 10.35625959 | 10.48274657 | 10.53910146 | 10.83678032 | 10.03462807  | 10.72680869 | 10.77121038 | 10.77704809  | 10.44159048 | 10.59251495 | 10.87045694 | 11.11184916 | 10.57655044 | 11.15167286  | 10.57655044 |
| RAS21    | 9.577842879 | 10.08394444 | 10.92747497 | 10.80974496 | 10.80974496 | 10.9625825  | 10.92747497 | 10.9625825   | 10.9625825  | 10.54831634 | 10.61604057  | 10.96684517 | 10.11588971 | 10.02493574 | 9.802317656 | 10.70157903 | 10.76562042  | 10.96036881 |
| Sep-06   | 10.51249641 | 10.75313854 | 11.26025278 | 10.43658444 | 10.84216476 | 10.97724309 | 10.35369821 | 10.47072805  | 10.53224067 | 10.58466066 | 10.77145797  | 10.49577691 | 11.15959281 | 11.34360409 | 10.12058191 | 10.89461716 | 10.5726588   | 10.19888485 |
| HS1788   | 10.10811909 | 11.74131937 | 10.98396261 | 10.98398302 | 10.64929519 | 10.9713955  | 10.56399732 | 10.36197759  | 10.5947573  | 10.23005864 | 10.52685786  | 10.59817846 | 11.39485243 | 10.40100897 | 10.1647423  | 10.48279676 | 10.2573927   | 10.27143389 |
| DEF6     | 10.67829762 | 11.02512853 | 11.48198111 | 10.76897033 | 10.64956581 | 10.53493693 | 10.17890245 | 10.63518423  | 10.62049205 | 10.67014519 | 10.47070683  | 10.31359942 | 10.29081063 | 10.46343961 | 10.81228245 | 10.43825553 | 10.64961129  | 10.2847723  |
| PRX11    | 10.33664638 | 10.65586798 | 10.04167692 | 10.52831545 | 10.2117978  | 10.1346891  | 11.18211405 | 10.1681091   | 11.18464396 | 11.0328624  | 10.44885119  | 10.50420445 | 10.28343659 | 10.07189063 | 10.86143541 | 11.13502601 | 10.55081944  | 10.55081944 |
| XPT0     | 10.17712123 | 10.43691999 | 11.11012862 | 10.61602943 | 10.22682613 | 9.63354998  | 9.991125874 | 10.10596347  | 10.66072761 | 10.79260241 | 10.09222606  | 10.7196769  | 10.25834729 | 10.53609137 | 10.7196769  | 10.8698386  | 10.2627702   | 10.2627702  |
| GAZ2     | 10.45981362 | 10.71561513 | 10.90955868 | 9.890792938 | 10.56724248 | 10.66028718 | 10.20091112 | 10.8842447   | 10.47359383 | 10.76953476 | 10.61540985  | 10.552523   | 10.06603065 | 10.49820568 | 11.04138255 | 10.58370769 | 11.02623714  | 10.59564301 |
| LRK11    | 10.55252461 | 11.03212076 | 10.81945458 | 10.63205429 | 10.48216415 | 10.82679719 | 9.98239733  | 10.45829621  | 10.73046225 | 10.45829621 | 10.45829621  | 10.45829621 | 10.45829621 | 10.45829621 | 10.45829621 | 10.45829621 | 10.45829621  | 10.45829621 |
| PTG11P   | 10.0241935  | 10.43878648 | 10.17706115 | 10.6074396  | 10.76133649 | 10.8851731  | 10.67047496 | 10.23071033  | 10.46618028 | 10.55102083 | 10.49609572  | 10.88915314 | 10.76615421 | 10.95520194 | 10.32018332 | 10.3121054  | 10.32265459  | 10.48521648 |
| Cl10A    | 10.85462142 | 10.56376441 | 10.74473804 | 10.31749175 | 10.60401125 | 11.13108119 | 10.50125758 | 10.6808726   | 10.22288148 | 10.81936487 | 10.5465364   | 10.66781239 | 10.27312764 | 10.58179403 | 10.54280544 | 10.32471801 | 10.85710882  | 10.41547572 |
| CA8A     | 9.83768855  | 10.78890513 | 8.961183883 | 8.959090959 | 10.11838646 | 10.0504202  | 10.1334284  | 10.150764973 | 10.43926761 | 10.1334284  | 10.75419574  | 11.37803255 | 11.16621003 | 10.95628627 | 10.99732392 | 11.04126014 | 10.20512528  | 10.6795701  |
| CCDC50   | 10.19694102 | 10.55482199 | 10.27028628 | 10.5881292  | 10.6302382  | 10.21488252 | 10.21669409 | 10.02551346  | 10.40950787 | 9.702377887 | 10.75419574  | 11.37803255 | 11.16621003 | 10.95628627 | 10.99732392 | 11.04126014 | 10.20512528  | 10.6795701  |
| PPP3C    | 10.6083307  | 10.73214639 | 10.84041721 | 10.83830284 | 10.6038943  | 10.13414366 | 10.96053088 | 10.35678812  | 10.36251864 | 10.5551169  | 10.29180008  | 11.0536725  | 10.42896404 | 10.99521238 | 11.0855319  | 10.87614428 | 10.5082732   | 10.2325763  |
| SP100    | 10.4784677  | 10.58664468 | 11.4601812  | 10.15265272 | 10.9318965  | 10.75677676 | 10.84717359 | 10.54228368  | 10.4237111  | 10.5551169  | 10.29180008  | 11.0536725  | 10.42896404 | 10.99521238 | 11.0855319  | 10.87614428 | 10.5082732   | 10.2325763  |
| LRK11    | 10.55252461 | 11.03212076 | 10.81945458 | 10.63205429 | 10.48216415 | 10.82679719 | 9.98239733  | 10.45829621  | 10.73046225 | 10.45829621 | 10.45829621  | 10.45829621 | 10.45829621 | 10.45829621 | 10.45829621 | 10.45829621 | 10.45829621  | 10.45829621 |
| FGFR10P2 | 10.29145595 | 10.06992166 | 10.7474627  | 10.3890426  | 10.68811622 | 10.73385599 | 10.68811622 | 10.73385599  | 10.68811622 | 10.37088427 | 10.68811622  | 10.20958339 | 11.46678405 | 10.3806909  | 10.6485128  | 10.82665484 | 10.49238144  | 10.49238144 |
| FHX07    | 10.46904974 | 10.44706533 | 10.67074243 | 10.88533564 | 10.75127394 | 10.18406436 | 10.8243902  | 10.16716422  | 10.58239038 | 10.21337473 | 10.55655838  | 10.68889762 | 10.797695   | 10.77740543 | 10.12471593 | 11.1874265  | 10.14468688  | 10.62262658 |
| NDEL1    | 10.24755685 | 11.0038914  | 10.0743334  | 10.6493628  | 10.93230111 | 11.00166235 | 10.10663096 | 10.57402133  | 10.5638104  | 10.4453871  | 11.1480428   | 11.00105459 | 11.40963548 | 11.01581539 | 11.02304887 | 10.85284844 | 10.12360752  | 11.00847878 |
| TMEM107  | 11.1494913  | 11.15246935 | 10.11028457 | 10.45470079 | 10.99758187 | 10.11501697 | 10.60265021 | 10.06786302  | 10.73483883 | 10.4168131  | 10.659112835 | 10.71213999 | 10.61211616 | 10.50072229 | 10.25123838 | 10.38780804 | 10.06317493  | 10.0297855  |
| ISOC1    | 10.47035956 | 10.55618406 | 10.7147748  | 10.37469422 | 10.7147748  | 10.5661163  | 10.77897914 | 10.16450885  | 10.63929166 | 10.36408537 | 10.5100753   | 11.01719872 | 10.97881213 | 11.0363686  | 10.25774787 | 10.56565542 | 9.99420068   | 10.57018526 |
| CLDN10   | 9.815006204 | 10.15775162 | 10.55832357 | 10.15829252 | 10.39401756 | 10.80026729 | 10.30855594 | 10.52691158  | 10.5926722  | 10.56291158 | 10.69419414  | 10.39237953 | 11.16921273 | 11.39780824 | 10.8236833  | 10.36232265 | 10.61409236  | 10.78338652 |
| PTRP1    | 10.71530516 | 10.73360445 | 11.09399388 | 10.79071975 | 10.99098778 | 10.09896175 | 1           |              |             |             |              |             |             |             |             |             |              |             |

|          |             |              |              |             |             |             |             |              |              |              |             |              |             |             |             |             |             |             |
|----------|-------------|--------------|--------------|-------------|-------------|-------------|-------------|--------------|--------------|--------------|-------------|--------------|-------------|-------------|-------------|-------------|-------------|-------------|
| PYURF    | 10.80782574 | 10.54264215  | 10.59416221  | 10.50185963 | 10.86417487 | 10.8353424  | 10.58166957 | 9.57861858   | 10.50951258  | 9.50152418   | 10.24994241 | 10.93841592  | 10.8954098  | 10.10944158 | 9.3225635   | 10.33189329 | 9.760248409 | 10.2232816  |
| NHLS     | 10.04447015 | 10.76026867  | 10.02977072  | 10.92174355 | 10.70344169 | 10.93121347 | 9.897381842 | 10.8210855   | 10.62988484  | 10.20291541  | 10.63085154 | 9.97123723   | 11.04872247 | 11.00290241 | 10.9260486  | 10.38018759 | 10.31379132 | 10.76131961 |
| DOB1     | 10.88891124 | 10.46991124  | 10.6953254   | 10.98141606 | 10.13784276 | 10.28001828 | 10.45429589 | 10.61961084  | 10.26534627  | 10.73996171  | 10.53957657 | 10.57062072  | 10.10664329 | 11.03609471 | 10.75124401 | 10.55345053 | 10.6391556  | 10.31469104 |
| STAT2    | 9.973023675 | 10.15873778  | 10.83318456  | 10.83112518 | 10.98055468 | 10.04662748 | 10.37137573 | 11.30676498  | 10.21068188  | 11.14000496  | 10.38189308 | 10.35412495  | 8.48384156  | 10.93785774 | 11.43752811 | 10.84338513 | 11.33017807 | 10.62107145 |
| SVH      | 9.847894391 | 10.69149394  | 10.89149394  | 10.69149394 | 10.89149394 | 10.89149394 | 10.89149394 | 10.89149394  | 10.89149394  | 10.89149394  | 10.89149394 | 10.89149394  | 10.89149394 | 10.89149394 | 10.89149394 | 10.89149394 | 10.89149394 | 10.89149394 |
| TV2P2B   | 10.02709952 | 10.66894645  | 10.37699458  | 10.37699458 | 10.99510829 | 10.15346488 | 10.29597999 | 10.87930708  | 10.14923572  | 10.17930708  | 10.47810835 | 10.93354795  | 10.29340281 | 10.72407045 | 10.52372412 | 10.75517344 | 10.11553784 | 10.20830300 |
| ALG2     | 11.05610756 | 10.52389     | 10.67382641  | 10.70139529 | 11.24875958 | 11.12608128 | 10.3071564  | 10.2053427   | 10.62100152  | 10.30161228  | 10.36436307 | 10.13244128  | 10.50568672 | 10.68052198 | 10.0091514  | 10.47640087 | 10.29773171 | 10.10038424 |
| Sep-01   | 10.44989188 | 10.88394102  | 10.83856123  | 10.7144872  | 10.5855647  | 11.04501385 | 10.22730172 | 10.838315897 | 10.37461246  | 10.27824212  | 10.0700046  | 11.60321419  | 11.15657317 | 10.98690588 | 10.17745513 | 10.42127271 | 10.52432793 | 10.47515678 |
| SCL12A4  | 10.46183037 | 10.77267048  | 10.64587509  | 10.41980744 | 10.62761267 | 10.26166118 | 10.32316587 | 9.985088167  | 10.55887239  | 10.61701825  | 10.26516536 | 10.87916911  | 10.70827362 | 10.6128237  | 10.39079947 | 10.53491576 | 10.39625748 | 10.84201449 |
| PSAT1    | 11.35559374 | 10.88159784  | 11.07328486  | 10.92785294 | 11.244871   | 10.8821359  | 10.8000095  | 9.812886689  | 10.52007578  | 10.25007578  | 10.60329557 | 11.33847554  | 9.936317382 | 9.62390809  | 9.631792531 | 10.47609459 | 9.830370569 | 10.4276399  |
| SURF1    | 10.31893368 | 10.9094377   | 10.9094377   | 10.96520351 | 10.09971553 | 11.02484735 | 10.67942133 | 10.91353473  | 10.49135347  | 10.15135347  | 10.72650812 | 10.49886362  | 10.94156098 | 11.05307557 | 9.842789122 | 11.11486595 | 10.0754304  | 10.23974563 |
| PSMD4    | 10.16516065 | 10.85679904  | 10.7595202   | 10.6161486  | 10.7661613  | 10.95487326 | 10.13852269 | 9.89647287   | 10.19343482  | 10.06607697  | 10.16696908 | 11.06526285  | 10.67549544 | 10.7479087  | 9.82094426  | 10.28446792 | 9.858489373 | 10.37183265 |
| CTA1     | 11.019441   | 10.48266686  | 10.6436149   | 10.53850375 | 10.50513328 | 10.3339871  | 10.34765144 | 10.78255872  | 10.74128629  | 10.91836779  | 10.1118667  | 10.59212321  | 10.36981247 | 10.46113082 | 10.35043363 | 10.20727366 |             |             |
| KCN3     | 10.24754726 | 9.83954647   | 11.10428393  | 9.366435248 | 10.4437117  | 11.1478923  | 10.81466594 | 10.77398367  | 10.39566598  | 10.61400402  | 10.84315956 | 10.48932417  | 11.00908889 | 10.27793996 | 10.51061524 | 10.47712078 | 10.59119565 | 10.29298659 |
| ATP5G3   | 10.65183498 | 10.78100211  | 10.47289025  | 10.46187596 | 10.47289025 | 10.67480058 | 10.26549412 | 10.54936578  | 10.19316468  | 10.29131648  | 10.73456268 | 10.95287466  | 10.33196781 | 10.30151443 | 10.26888006 | 10.24664523 | 10.31627965 | 10.57455994 |
| TRAPP3C  | 10.80280866 | 10.87079326  | 11.13577105  | 10.45218756 | 10.7542463  | 10.68076269 | 10.68161228 | 10.09031114  | 10.567769    | 10.26634492  | 10.47999769 | 10.50172602  | 10.6807027  | 10.43674582 | 10.16298663 | 10.38110314 | 10.15208073 | 10.32331614 |
| RPS198P1 | 10.7022385  | 10.5999248   | 10.80875108  | 10.42487706 | 10.62440106 | 10.80812384 | 10.62440106 | 9.891438999  | 10.16241127  | 10.08703293  | 10.05650385 | 10.66128244  | 10.95838646 | 10.55365607 | 9.862176488 | 9.980529044 | 10.0040017  | 10.10575994 |
| PCYOX1   | 9.940703423 | 9.885478339  | 10.81185536  | 10.76458624 | 10.51898751 | 10.36887679 | 10.94866586 | 10.4494394   | 10.39642297  | 10.63084285  | 10.75463611 | 10.15652343  | 9.962398515 | 10.59984068 | 10.50778254 | 10.34142212 | 10.85487474 | 9.88266217  |
| TMEM167A | 10.69535328 | 10.49691342  | 10.45201314  | 10.62348632 | 10.71867049 | 11.08617619 | 10.54530404 | 10.47096718  | 10.5753653   | 10.39994698  | 10.70527531 | 10.39643079  | 10.69707416 | 10.53916021 | 10.18725534 | 10.43551082 | 10.38953321 | 10.43868176 |
| TNXL4A   | 10.52961594 | 10.50539498  | 10.46147011  | 10.54738794 | 10.79979714 | 10.78497488 | 10.46142006 | 10.11921011  | 10.40415867  | 10.31260288  | 10.30864903 | 10.54596408  | 10.61051316 | 10.66191649 | 10.06520962 | 10.16164209 | 10.5099465  | 10.16566551 |
| TM15     | 10.46504915 | 10.21440435  | 10.49854874  | 10.1396421  | 10.2106607  | 10.5505909  | 10.40338286 | 10.77703107  | 10.46354025  | 10.71511559  | 10.5653842  | 10.75180917  | 10.30553801 | 10.12051238 | 10.84049578 | 10.66362669 | 10.7900547  | 10.7509183  |
| SFR51    | 10.20947998 | 10.41185373  | 10.32803489  | 10.25133849 | 10.92492412 | 10.2847167  | 10.69845097 | 10.83421218  | 10.27717122  | 10.55477205  | 10.52996698 | 10.864708342 | 10.91091325 | 10.85731336 | 10.69751088 | 10.75706037 | 10.4580719  | 10.89596913 |
| NAP1L1   | 10.50186284 | 10.88539999  | 10.71539984  | 10.31764982 | 10.70380204 | 10.39023683 | 10.65414431 | 10.39344707  | 10.55695774  | 10.37382209  | 10.77347283 | 10.6034484   | 10.75312058 | 10.39721121 | 10.05641386 | 10.45638498 | 10.32336064 | 10.06946623 |
| DNAJC10  | 10.63213326 | 10.40899338  | 10.5477777   | 10.72556499 | 11.03053585 | 10.26291813 | 10.7350705  | 10.19445331  | 10.0531069   | 10.5031069   | 10.82161497 | 10.81524818  | 10.90355751 | 10.01515693 | 10.34739591 | 10.42159365 | 10.45643912 | 10.7848921  |
| PNRP     | 9.756620351 | 9.532813825  | 10.0651744   | 9.96174575  | 9.460377627 | 11.12061914 | 10.65292292 | 10.71612158  | 10.1901447   | 10.47946071  | 11.66991543 | 10.03532376  | 10.47623891 | 10.93693826 | 11.09820659 | 10.93073305 | 10.29471427 | 10.02881056 |
| DEF8     | 10.80120582 | 9.668847399  | 10.52469416  | 10.50293865 | 10.3218337  | 11.0812545  | 10.68054925 | 10.51736457  | 9.994627318  | 10.36484862  | 10.2219379  | 10.96206936  | 10.88693039 | 11.17927803 | 10.30286639 | 9.971290464 | 10.40173204 | 10.55656225 |
| DNAJB6   | 10.4371174  | 10.69858741  | 10.5569597   | 10.5083884  | 10.68187096 | 10.3826747  | 10.21738934 | 10.75959695  | 10.411758016 | 10.411758016 | 10.41915254 | 10.8823202   | 10.50790994 | 10.46638066 | 10.99909026 | 10.2050999  | 10.39780456 | 10.48511949 |
| TM6A     | 9.82897957  | 9.76913514   | 10.29149267  | 10.67544022 | 10.76913514 | 10.45409372 | 10.34792968 | 10.46519926  | 10.2993089   | 10.2993089   | 10.46519926 | 10.46519926  | 10.46519926 | 10.46519926 | 10.46519926 | 10.46519926 | 10.46519926 | 10.46519926 |
| PCGF5    | 10.24361421 | 10.54456319  | 10.7861586   | 10.54532884 | 10.3544824  | 10.8620034  | 10.73250911 | 10.38978114  | 10.59866653  | 10.28042481  | 10.4195284  | 10.62005194  | 10.54939055 | 10.29425533 | 10.11028525 | 10.05649692 | 10.80255858 |             |
| FCHSD2   | 9.550212428 | 10.47187319  | 9.894834223  | 9.783971035 | 10.46900987 | 10.59327568 | 10.59612428 | 10.41661472  | 10.61938068  | 10.80032768  | 10.9186752  | 10.12900393  | 10.0191891  | 10.32761647 | 10.87639719 | 10.70731717 | 11.03780818 | 10.39919096 |
| ATP1A1   | 10.10520265 | 10.20452959  | 10.78078407  | 10.70594917 | 10.71206687 | 10.59506865 | 10.28421261 | 10.1946471   | 10.3964741   | 10.21252311  | 10.83577408 | 10.44669683  | 10.24059055 | 10.15861835 | 10.48872639 | 10.22710884 | 10.32668607 |             |
| MVP      | 10.18091582 | 10.50425244  | 10.41584845  | 10.79137461 | 10.52830504 | 10.27971578 | 10.93883072 | 10.22342481  | 10.24582783  | 10.66622942  | 10.28611579 | 10.43281247  | 10.91131337 | 10.27405702 | 10.85087209 | 10.22146682 | 10.50254209 | 10.96331004 |
| SCL38A1  | 9.752899785 | 9.550267086  | 10.21487364  | 10.67141339 | 10.53506922 | 8.793605862 | 10.41401056 | 11.03920157  | 10.29806289  | 10.36921624  | 10.59350359 | 10.24866995  | 9.994720886 | 10.62179812 | 11.40091784 | 10.68490267 | 10.2065501  | 10.7398832  |
| USP16    | 9.2472058   | 10.48514406  | 9.97147661   | 10.57128869 | 10.77242788 | 10.246296   | 10.1053894  | 10.67028228  | 10.46425257  | 10.44786802  | 10.50007374 | 10.71396159  | 10.46775333 | 10.00439847 | 10.50430303 | 10.40562064 | 10.5958511  | 10.46442205 |
| MRPL55   | 10.7410958  | 10.67538482  | 10.5318482   | 10.67538482 | 10.7410958  | 10.7410958  | 10.7410958  | 10.7410958   | 10.7410958   | 10.7410958   | 10.7410958  | 10.7410958   | 10.7410958  | 10.7410958  | 10.7410958  | 10.7410958  | 10.7410958  | 10.7410958  |
| ARL8D    | 9.99020344  | 9.6923659    | 9.719109267  | 10.53358486 | 9.700784296 | 11.32056368 | 10.4246632  | 10.64465717  | 11.04438517  | 11.04438517  | 11.2016255  | 7.93934256   | 10.40463265 | 10.54508671 | 10.11373309 | 10.31258889 | 10.49809274 | 10.9691028  |
| SVNE2    | 10.4904261  | 10.39166545  | 10.95457303  | 10.33978717 | 9.66476192  | 9.31481971  | 8.79859172  | 10.94987433  | 10.18368403  | 10.50495993  | 10.47212341 | 10.31971212  | 10.35692634 | 10.40589092 | 10.093406   | 10.82344651 | 10.69497455 | 10.61606291 |
| S100A6   | 10.54818138 | 11.136701721 | 10.84615377  | 10.92092269 | 10.84615377 | 10.84615377 | 10.84615377 | 10.84615377  | 10.84615377  | 10.84615377  | 10.84615377 | 10.84615377  | 10.84615377 | 10.84615377 | 10.84615377 | 10.84615377 | 10.84615377 | 10.84615377 |
| VPS37B   | 9.559607876 | 10.16204993  | 10.61855565  | 10.74788592 | 10.21005076 | 11.08261761 | 10.71989145 | 9.987120203  | 10.38708383  | 10.5586317   | 10.98551211 | 10.13528283  | 10.60793885 | 10.53353422 | 10.03295637 | 10.21851184 | 10.3348188  | 10.8356777  |
| MEPR     | 10.4917802  | 11.36002545  | 10.6009959   | 10.46029516 | 10.84021969 | 10.87878495 | 10.35757743 | 10.38868104  | 10.38868104  | 10.38868104  | 10.42817339 | 10.60884217  | 10.75945655 | 10.60626068 | 10.01315117 | 10.07570054 | 10.10505161 | 10.24517574 |
| LT4AH    | 10.97672319 | 10.68058415  | 10.50531371  | 10.51517235 | 10.69705926 | 10.6390276  | 9.42844564  | 9.96517058   | 10.54880078  | 10.45680947  | 10.46334    | 10.89110276  | 10.39186724 | 8.639243692 | 9.792720307 | 10.17937077 | 10.31851183 | 10.0544427  |
| SKIL     | 9.62329656  | 9.548539282  | 10.548539282 | 10.17571498 | 10.46440995 | 10.56512349 | 10.85344672 | 11.05621139  | 10.69214067  | 10.72547486  | 10.         |              |             |             |             |             |             |             |





|           |             |             |             |              |             |              |             |              |              |             |             |              |              |              |             |             |             |             |
|-----------|-------------|-------------|-------------|--------------|-------------|--------------|-------------|--------------|--------------|-------------|-------------|--------------|--------------|--------------|-------------|-------------|-------------|-------------|
| WDR305    | 10.65609614 | 10.32387927 | 10.61960866 | 10.41780264  | 10.25637407 | 10.84114157  | 10.36787699 | 10.04459271  | 10.38970438  | 9.96359087  | 10.27178965 | 10.40405769  | 10.34833088  | 10.43439358  | 9.95958529  | 9.94455522  | 9.947607567 | 9.973176842 |
| PPIG      | 10.92288394 | 10.42665034 | 10.38440352 | 10.59542322  | 10.72020786 | 8.856425175  | 10.17285665 | 10.725502492 | 10.35383374  | 10.00311155 | 10.00363575 | 10.61194951  | 10.11270418  | 10.45668838  | 9.723182319 | 10.30843104 | 10.08015627 | 10.38714573 |
| TMX1      | 10.48063554 | 10.33592924 | 10.41408112 | 10.33734277  | 10.9013869  | 10.23403875  | 10.96155011 | 10.96155011  | 10.43224776  | 10.03166665 | 10.49223841 | 10.63783019  | 10.10654502  | 10.55859921  | 10.23100787 | 10.17907372 | 10.68509943 | 10.98039563 |
| MPZ11     | 10.02736374 | 10.31983337 | 10.69532777 | 10.79710642  | 9.91567411  | 10.35664168  | 10.53959435 | 10.22493751  | 10.332920592 | 10.49853533 | 10.35793539 | 9.431004548  | 10.85241587  | 10.33172751  | 10.25828118 | 10.49628416 | 10.09698645 | 10.25194159 |
| CMR       | 10.10640475 | 10.77396982 | 10.57939832 | 10.57939832  | 10.44040858 | 10.52111688  | 9.57699002  | 9.84978137   | 10.24408858  | 10.39543389 | 10.57090827 | 10.46594102  | 9.94490531   | 10.60427449  | 9.683513582 | 10.25194159 | 10.34451582 | 10.49295885 |
| ZRANB2    | 10.15379625 | 10.1236655  | 10.1236655  | 10.1236655   | 10.1236655  | 10.1236655   | 10.1236655  | 10.1236655   | 10.1236655   | 10.1236655  | 10.1236655  | 10.1236655   | 10.1236655   | 10.1236655   | 10.1236655  | 10.1236655  | 10.1236655  | 10.1236655  |
| BNI2      | 10.7099946  | 10.32483299 | 10.9061518  | 10.1600333   | 10.4130606  | 9.826874784  | 10.83100144 | 10.30997863  | 10.33038465  | 10.27449018 | 10.76267297 | 10.37733391  | 10.00205166  | 10.28375926  | 10.20221177 | 10.6428558  | 10.03158833 | 10.65437965 |
| FAM136A   | 10.18458751 | 10.50575158 | 9.778602101 | 10.29144492  | 10.22023417 | 10.32125173  | 10.36746831 | 9.947869586  | 10.40685668  | 10.43061362 | 10.36409139 | 10.4877732   | 10.19582867  | 10.4077447   | 10.39945417 | 10.33274705 | 10.16383019 | 10.49628416 |
| SF1       | 10.68446364 | 10.39215405 | 9.985893279 | 10.64696054  | 10.23070181 | 10.54406346  | 10.2612971  | 10.31640001  | 10.19438894  | 9.886989774 | 10.33395971 | 9.806810553  | 10.41732123  | 10.82745504  | 10.42870295 | 10.34006013 | 10.1003932  | 10.3176398  |
| NDUF810   | 10.6113639  | 10.5607134  | 10.48691432 | 10.25196334  | 10.48691432 | 10.50720351  | 10.28848001 | 10.25793147  | 10.28848001  | 10.25793147 | 10.2575588  | 10.64517733  | 10.108983776 | 10.88314414  | 9.962140842 | 10.13612743 | 10.2923243  | 10.18781342 |
| B08A3508  | 10.69617746 | 10.75451529 | 10.3886531  | 10.81255776  | 10.31159405 | 10.31553633  | 9.928530512 | 9.97246691   | 9.928530512  | 9.97246691  | 9.82731533  | 10.65921903  | 11.26396801  | 10.89839756  | 10.16006796 | 10.19152322 | 9.964016088 | 10.18346335 |
| CIQP      | 10.58879956 | 10.12664209 | 10.12664209 | 10.52420706  | 10.7842902  | 10.46927029  | 9.818227427 | 10.3423903   | 9.791114996  | 9.8484794   | 10.30514992 | 10.50423066  | 10.46088029  | 9.710337474  | 10.29945292 | 9.803697099 | 10.20709877 | 10.34451582 |
| SRNP200   | 10.52054544 | 10.53913129 | 10.70998332 | 10.661851565 | 10.12405669 | 10.13124509  | 10.62710986 | 10.45323288  | 10.4085756   | 10.1788922  | 9.70752655  | 9.735814098  | 10.15738562  | 10.26542183  | 10.61548786 | 10.69522947 | 10.69522947 | 10.69522947 |
| YEL3      | 10.46680336 | 10.73132629 | 11.00898712 | 10.40188685  | 10.34554346 | 9.939571942  | 10.71583437 | 10.3312906   | 10.21735265  | 10.21735265 | 10.21761154 | 10.06823039  | 9.951479983  | 10.90068357  | 10.14735656 | 10.13539289 | 10.3774292  | 9.944636576 |
| HIST2H4A4 | 10.22902715 | 10.22902715 | 10.60150169 | 9.54854552   | 10.23617572 | 10.40409396  | 10.04651748 | 10.64600295  | 9.94608075   | 10.21894117 | 10.45163178 | 10.51973078  | 10.84849913  | 10.1508984   | 10.56821943 | 10.15125595 | 10.07133693 | 10.48772672 |
| NP056     | 10.05218341 | 10.05336063 | 9.926461958 | 9.75039074   | 9.942075397 | 10.742734212 | 10.69875046 | 10.633093    | 9.37127388   | 10.39113302 | 10.33501405 | 10.12286688  | 10.30464246  | 10.27850931  | 10.85674151 | 10.29893753 | 10.45086724 | 10.48351923 |
| PRK2D     | 10.75614061 | 10.73290866 | 10.96167605 | 10.73290866  | 10.01514209 | 10.4436169   | 10.04030174 | 10.28916923  | 10.28056969  | 10.29233689 | 10.06048434 | 10.105875883 | 10.63456622  | 10.664567203 | 10.17245461 | 10.11239939 | 10.48032089 | 10.48032089 |
| CRBN      | 10.33569122 | 10.29722925 | 10.93837174 | 11.41709429  | 10.73461681 | 10.7622825   | 9.907292019 | 8.9521944    | 10.2050717   | 10.1778051  | 10.59612357 | 11.50716199  | 11.36327267  | 10.08257113  | 10.0963501  | 10.0496261  | 10.34662323 | 10.34662323 |
| TUBGCP6   | 10.16134616 | 10.54546593 | 10.54546593 | 10.30299021  | 9.678974691 | 9.744056127  | 10.08948392 | 9.751100931  | 10.93774427  | 9.900674592 | 10.18203474 | 10.69974175  | 10.91272043  | 11.18538078  | 10.4790363  | 10.11598084 | 10.32740502 | 10.32740502 |
| BET1      | 10.49862734 | 10.27133202 | 10.39723837 | 10.3565121   | 10.38504592 | 10.70520043  | 10.30595928 | 9.767801988  | 10.3232276   | 9.859440549 | 9.87405952  | 10.50765406  | 10.40519939  | 10.7857034   | 9.802573905 | 10.30465070 | 9.62218469  | 9.62218469  |
| ETK1      | 9.925559962 | 10.27755788 | 10.64168259 | 9.823483991  | 9.67715291  | 10.39871551  | 9.72864235  | 10.74574164  | 10.0735544   | 10.40551052 | 10.43331356 | 9.803028494  | 9.707221252  | 10.6807855   | 10.34146791 | 10.28327097 | 10.40230428 | 10.61773742 |
| IFNGR2    | 10.64655939 | 10.62255559 | 10.62451068 | 10.62255559  | 10.40298417 | 10.32502608  | 10.6021193  | 10.36941432  | 10.51947117  | 10.51947117 | 10.47939005 | 9.568317892  | 10.29875494  | 10.51948137  | 9.974305585 | 9.670442651 | 9.88697436  | 9.97647936  |
| MOXD1     | 11.19771626 | 10.7193667  | 11.34837473 | 10.4443632   | 10.65867782 | 9.542931083  | 10.78113031 | 10.00991242  | 10.63466916  | 10.5935129  | 10.39708703 | 10.0790359   | 10.2122663   | 9.93558477   | 9.478397567 | 10.03890474 | 9.92012888  | 9.318736083 |
| AB11      | 10.30824234 | 10.5092691  | 10.06135948 | 9.26006638   | 9.56435877  | 10.9815525   | 10.33624547 | 9.867461431  | 10.69868182  | 10.30824234 | 10.68709593 | 9.71298977   | 9.645005627  | 10.56100056  | 10.09679672 | 10.33611815 | 10.04184003 | 10.45181255 |
| ANAPC13   | 10.77052824 | 10.73993151 | 10.6995864  | 10.34995209  | 10.5301655  | 10.34995209  | 10.78128977 | 9.832055646  | 9.741467857  | 10.1761355  | 10.28945849 | 10.23931448  | 10.104328162 | 10.49474667  | 10.62773717 | 10.52011701 | 10.57067527 | 10.27622871 |
| TRPC4P    | 10.38696864 | 9.443533832 | 10.26185686 | 8.853749616  | 10.31788884 | 10.1576041   | 10.00541721 | 10.38679974  | 10.24745178  | 10.33381645 | 10.28945849 | 10.23931448  | 10.104328162 | 10.49474667  | 10.62773717 | 10.52011701 | 10.57067527 | 10.27622871 |
| CARS      | 10.57039335 | 10.44481320 | 10.5607546  | 10.05366799  | 10.56933399 | 9.964976678  | 10.62178271 | 10.30399831  | 10.18079315  | 10.30399831 | 10.05930802 | 10.74255602  | 10.84298052  | 10.46441297  | 10.29554718 | 10.18511197 | 10.11809884 | 10.14567211 |
| CDK1B     | 10.28916675 | 10.55178922 | 10.61501892 | 10.55178922  | 10.61501892 | 10.55178922  | 10.61501892 | 10.55178922  | 10.61501892  | 10.55178922 | 10.61501892 | 10.55178922  | 10.61501892  | 10.55178922  | 10.61501892 | 10.55178922 | 10.61501892 | 10.55178922 |
| ARHGAP27  | 10.05821387 | 10.50986975 | 10.1035443  | 10.17358396  | 10.5346446  | 10.17374135  | 10.61704427 | 10.14829844  | 10.44298944  | 10.91046227 | 10.14829844 | 10.44298944  | 10.91046227  | 10.14829844  | 10.44298944 | 10.91046227 | 10.14829844 | 10.44298944 |
| CORO7     | 10.18633967 | 9.836037892 | 10.31472831 | 10.6922761   | 10.43984498 | 10.1899068   | 10.32669264 | 10.29168285  | 10.24892312  | 10.17135551 | 10.28847402 | 9.905303201  | 10.8791899   | 10.71706909  | 10.37866653 | 10.42954354 | 10.36240519 | 10.04351938 |
| NDUF410   | 10.38120637 | 10.3780466  | 10.3780466  | 10.3780466   | 10.3780466  | 10.3780466   | 10.3780466  | 10.3780466   | 10.3780466   | 10.3780466  | 10.3780466  | 10.3780466   | 10.3780466   | 10.3780466   | 10.3780466  | 10.3780466  | 10.3780466  | 10.3780466  |
| UBL3      | 10.6186292  | 10.82222531 | 10.9926199  | 10.6905082   | 10.64826117 | 9.914040527  | 9.962257099 | 10.2682575   | 10.8806744   | 10.07343663 | 10.8059162  | 9.798621401  | 9.835195223  | 10.31253828  | 9.973713459 | 10.59284684 | 9.66995895  | 10.2927163  |
| AKR1B1    | 10.50005578 | 10.27629468 | 10.6320398  | 10.27629468  | 10.9744895  | 10.61025411  | 10.39753943 | 10.09067739  | 10.18387314  | 10.23369058 | 10.2089604  | 10.32850439  | 10.63762786  | 10.88750759  | 10.0613385  | 10.19832898 | 10.23642788 | 10.39043717 |
| APX1      | 10.22094043 | 10.71288914 | 10.7190813  | 10.45039399  | 10.28138266 | 10.65733198  | 10.49889935 | 10.19694304  | 10.32330935  | 10.11626653 | 10.2524996  | 10.49975129  | 10.71934258  | 10.4616005   | 10.25099127 | 9.864791364 | 10.15803399 | 10.26947108 |
| TRAF3     | 10.46509453 | 10.59110321 | 10.94169659 | 9.96254108   | 9.9753941   | 9.96254108   | 9.9753941   | 10.45649081  | 10.11703711  | 10.14877392 | 10.3048671  | 10.571393747 | 10.4545523   | 10.46707801  | 10.26089076 | 10.46372509 | 10.09789458 | 10.46372509 |
| TRIM28    | 10.33312033 | 10.50986975 | 10.1035443  | 10.17358396  | 10.5346446  | 10.17374135  | 10.61704427 | 10.14829844  | 10.44298944  | 10.91046227 | 10.14829844 | 10.44298944  | 10.91046227  | 10.14829844  | 10.44298944 | 10.91046227 | 10.14829844 | 10.44298944 |
| SEC16A    | 9.95577317  | 9.787733649 | 10.3583535  | 10.54278749  | 9.428014575 | 9.105018694  | 10.26200372 | 10.25530465  | 9.87197533   | 10.3529465  | 10.1155564  | 10.84625511  | 9.914440894  | 10.55334912  | 10.50150427 | 10.34026234 | 10.59534607 | 10.46135809 |
| STK4      | 9.756731814 | 10.60747973 | 10.25457832 | 10.10225904  | 10.40593683 | 9.457461172  | 10.07436067 | 9.73888483   | 10.66671271  | 10.48314825 | 9.90038277  | 9.628991596  | 10.34759145  | 10.10706652  | 10.79870677 | 10.61228027 | 10.41581289 | 10.41581289 |
| APFH      | 10.29707129 | 10.71028688 | 10.07078077 | 10.3190511   | 10.04101939 | 10.39836897  | 10.57694762 | 10.30602570  | 10.04355794  | 10.29645879 | 10.30491835 | 10.3735283   | 10.30953241  | 10.32764835  | 10.19824951 | 10.21466403 | 8.85326029  | 10.24578142 |
| NSF       | 9.97195465  | 9.692111207 | 10.09646509 | 10.39542516  | 10.47399905 | 9.978855649  | 10.40978018 | 10.14685757  | 10.33503254  | 10.15878235 | 10.37828515 | 10.3952124   | 9.967682853  | 10.14878794  | 10.41665505 | 10.31781421 | 10.28303908 | 10.28303908 |
| PAPSS1    | 9.89801957  | 10.59294335 | 10.1248175  | 10.5873993   | 10.68436296 | 9.57650377   | 10.2159963  | 10.34985804  | 10.30880103  | 10.24254929 | 10.0318602  | 10.12918975  | 9.669349841  | 10.49136049  | 10.61465216 | 10.5334968  | 10.29038497 | 9.97325533  |
| VDAC3     | 9.861298177 | 10.23057036 | 10.47384493 | 10.23057036  | 10.47384493 | 10.23057036  | 10.47384493 | 10.23057036  |              |             |             |              |              |              |             |             |             |             |



|         |              |             |             |             |             |             |             |             |             |             |             |             |             |             |             |              |             |             |
|---------|--------------|-------------|-------------|-------------|-------------|-------------|-------------|-------------|-------------|-------------|-------------|-------------|-------------|-------------|-------------|--------------|-------------|-------------|
| PTPN1   | 8.477110052  | 8.842676354 | 9.39867496  | 9.143906721 | 9.323633729 | 10.65227082 | 10.04732341 | 11.06145117 | 10.02319625 | 10.18986632 | 11.47747384 | 9.514486961 | 10.30198357 | 10.32435719 | 11.46275816 | 10.87548415  | 10.16824533 | 10.92891309 |
| NDUF55  | 9.823478522  | 10.31455067 | 10.32495858 | 10.31469601 | 10.20834027 | 10.41979007 | 10.35661389 | 9.943548718 | 10.38178509 | 10.08391633 | 10.18787731 | 10.0894043  | 10.15412063 | 9.854530991 | 10.10189527 | 9.922115639  | 10.16891251 | 10.16891251 |
| ACADM   | 10.35999172  | 10.65082628 | 9.73664345  | 10.40294634 | 10.75197368 | 10.10019157 | 10.49155434 | 9.807734734 | 10.37996711 | 10.10502761 | 9.863591775 | 10.46108396 | 10.22137021 | 10.20726504 | 9.828187205 | 10.15391673  | 9.989976117 | 10.47555717 |
| CREBBF  | 9.588126762  | 10.60221999 | 10.70426651 | 10.63796119 | 9.494058503 | 10.31503123 | 10.00261307 | 10.20586866 | 10.50350209 | 9.885704026 | 10.45234067 | 9.746075285 | 10.51014247 | 8.728217981 | 10.28467051 | 10.150595987 | 9.799434694 | 10.05008663 |
| CNRP1   | 10.37651399  | 10.81182086 | 10.18120096 | 10.73851197 | 9.883555569 | 10.51601118 | 10.21445119 | 10.03600701 | 10.17324451 | 9.770071497 | 10.17324451 | 9.849372026 | 9.41891273  | 10.59574014 | 10.18426569 | 9.728629549  | 9.645717196 | 10.16773906 |
| UCCK2   | 9.79852652   | 10.2975544  | 10.18043883 | 10.18043883 | 10.3068286  | 10.34744208 | 10.71746857 | 9.907339522 | 10.00687454 | 9.53765699  | 10.02592829 | 10.26655208 | 8.989007654 | 9.7572624   | 8.88451448  | 10.0087165   | 10.1750834  | 10.6618541  |
| RALG2   | 9.658580348  | 9.88632715  | 9.360181664 | 10.20604376 | 9.64201963  | 10.14934201 | 10.35634443 | 10.95678463 | 9.997985033 | 10.30986586 | 10.34959072 | 9.679421349 | 10.70349517 | 8.86562106  | 11.33237682 | 10.50682039  | 10.2662779  | 10.0368511  |
| SLC5P1  | 10.19170601  | 9.52803424  | 10.16241507 | 10.31862285 | 9.79953163  | 10.25801249 | 10.44857282 | 9.682038531 | 9.898976074 | 9.980385231 | 10.36350185 | 10.48753723 | 10.52778841 | 10.20304388 | 9.827456641 | 10.36139227  | 10.13127028 | 10.03294693 |
| ALG3    | 10.189912    | 10.29943449 | 10.4579339  | 9.544975062 | 10.3735647  | 9.29845199  | 10.63872717 | 9.871252442 | 10.1636413  | 9.992579328 | 9.95587064  | 10.28705934 | 10.37406706 | 10.69623642 | 9.650446931 | 8.909307613  | 10.95103691 | 9.959730867 |
| PPPGC   | 10.343472    | 10.10094982 | 10.10094982 | 10.68014668 | 9.98065551  | 9.80164002  | 10.43193589 | 10.45694889 | 10.80164002 | 10.1519613  | 9.79026652  | 9.543066512 | 9.749991165 | 10.33555163 | 10.38551134 | 10.16917950  | 10.10149636 |             |
| CHAC1   | 10.12510308  | 10.29020753 | 10.1511947  | 10.29020753 | 10.74514554 | 8.84858294  | 10.12619674 | 10.18673121 | 9.493769641 | 9.794894005 | 10.72574093 | 10.37052089 | 9.212802502 | 10.41254676 | 10.2996689  | 9.859529333  | 8.989653951 | 11.0194941  |
| SELPJ   | 9.30700488   | 9.754738611 | 11.03869143 | 9.678567976 | 10.01604836 | 10.75712469 | 10.45624035 | 10.45419649 | 9.52226802  | 9.93522724  | 10.57269551 | 9.680007866 | 10.14230923 | 9.756406676 | 10.70101214 | 10.20517038  | 10.02594719 | 9.75369831  |
| MT2B    | 10.12865138  | 10.32437697 | 10.12865138 | 9.901734519 | 10.16553994 | 10.13169184 | 10.14203939 | 9.975224412 | 10.20511785 | 10.25505625 | 10.25062866 | 10.26055997 | 10.18002308 | 9.7255507   | 9.83077125  | 10.32618984  | 9.95565707  |             |
| AKA     | 10.78092872  | 10.37277196 | 10.32409504 | 10.58001447 | 10.33324129 | 10.40607096 | 10.02205156 | 9.666145258 | 9.851881442 | 9.627962087 | 9.845091719 | 10.48271208 | 10.48047272 | 9.375929427 | 9.594003933 | 9.945846307  | 9.507415669 |             |
| RPT2    | 10.74758576  | 10.70114827 | 10.14859748 | 10.44617898 | 10.68400832 | 10.55070627 | 10.23458192 | 9.80244359  | 9.01956111  | 10.19499211 | 10.19440859 | 9.750831746 | 10.10388768 | 10.02506598 | 9.73663373  | 10.10685667  |             |             |
| UGGT1   | 8.678272461  | 9.431696165 | 9.908074006 | 9.351027643 | 9.516193854 | 9.98509592  | 11.17825565 | 10.48787148 | 10.38145523 | 10.67019146 | 10.74735777 | 10.03513695 | 9.375379293 | 11.0394977  | 10.24993222 | 10.53038959  | 10.24349211 | 10.09835149 |
| NOMO1   | 9.628505861  | 9.763074738 | 10.09486711 | 10.24175006 | 10.49827517 | 9.81584939  | 10.14002169 | 10.25542726 | 9.781960793 | 10.04401269 | 10.42909176 | 10.62118908 | 9.310447937 | 9.682122698 | 10.52203841 | 9.594372272  | 9.07771687  | 10.34231498 |
| UGP2    | 9.85329586   | 10.39817304 | 10.57011643 | 10.73753    | 10.60983168 | 10.2981257  | 9.85089499  | 9.788303263 | 10.20068499 | 10.08121055 | 10.07998666 | 10.39976639 | 10.06322639 | 10.18867782 | 9.822415627 | 10.23137193  | 9.82574247  | 10.14342973 |
| GBRP1   | 10.0950318   | 10.49644171 | 10.15253062 | 10.0068544  | 10.00932165 | 10.54099291 | 9.869330993 | 9.912333675 | 10.41925277 | 10.28761148 | 9.85377611  | 10.32384431 | 10.57262726 | 10.26298079 | 10.07589578 | 10.38621094  | 9.885560495 | 9.859864395 |
| TMEM134 | 8.99234338   | 10.62398441 | 10.2665001  | 10.40277405 | 10.33169028 | 10.32225071 | 10.15295999 | 9.725148647 | 10.17531573 | 9.965402651 | 10.17531573 | 10.32486516 | 10.66551713 | 10.25300835 | 9.765683903 | 10.04799981  | 9.842302068 | 9.861656015 |
| MT2B    | 9.5685306    | 10.46527371 | 9.98803945  | 10.44744123 | 9.90382998  | 9.852953805 | 10.5064855  | 10.08310616 | 10.30961632 | 10.10391815 | 10.12252982 | 10.45735997 | 10.14400188 | 10.18002606 | 10.2533339  | 10.37465313  | 10.0690366  | 10.30774741 |
| IRF3    | 10.16424373  | 10.55606005 | 10.42481362 | 10.05789701 | 10.2911716  | 10.47086311 | 10.41083258 | 9.92346173  | 10.15832399 | 9.965884458 | 10.18607978 | 10.81819485 | 10.17678972 | 9.947859646 | 10.12337076 | 10.06226006  | 10.09616063 |             |
| PTEN    | 10.19293715  | 10.23754009 | 10.13561837 | 10.47311103 | 9.887577299 | 10.27139553 | 9.850618229 | 9.738352975 | 10.18693865 | 9.984247667 | 10.39510685 | 9.54373508  | 10.36674047 | 10.70473274 | 9.724050514 | 10.21890212  | 10.0303682  | 9.93892519  |
| SGK1    | 8.89530117   | 9.834530095 | 10.22340311 | 9.37811475  | 9.60247175  | 10.02858686 | 10.16232618 | 9.54243069  | 9.98243069  | 9.984247667 | 10.43333301 | 10.08483968 | 10.80575183 | 10.29668845 | 12.69159709 | 11.61932083  | 9.37218187  | 11.17177444 |
| ANAPC11 | 10.18296603  | 10.6217126  | 10.5434842  | 10.38180788 | 10.40316747 | 10.32882547 | 10.32700668 | 9.79120276  | 10.01882252 | 9.683426884 | 9.963260841 | 10.52124408 | 10.16330955 | 10.15283791 | 9.461085185 | 9.777225603  | 9.73985564  | 9.904391226 |
| RELB    | 9.59338727   | 9.799358298 | 10.47098906 | 9.577483344 | 10.04615313 | 10.2079186  | 9.961651402 | 10.5710297  | 10.43737041 | 10.02210625 | 10.77720731 | 9.93663109  | 9.622476938 | 10.34871484 | 10.46172799 | 10.21294807  | 10.10821165 | 10.39859716 |
| CLF1    | 8.678763732  | 9.779239931 | 9.188626805 | 9.35776675  | 9.27320221  | 10.8603806  | 10.9636527  | 10.4887181  | 10.90174467 | 10.30307103 | 11.6093089  | 9.399972954 | 10.01173014 | 9.504719566 | 10.43081126 | 10.99171282  | 9.93488377  | 10.70698607 |
| TMEM134 | 10.146485213 | 10.55606005 | 10.42481362 | 10.05789701 | 10.2911716  | 10.47086311 | 10.41083258 | 9.92346173  | 10.15832399 | 9.965884458 | 10.18607978 | 10.81819485 | 10.17678972 | 9.947859646 | 10.12337076 | 10.06226006  | 10.09616063 |             |
| PKNOX1  | 10.19293715  | 10.23754009 | 10.13561837 | 10.47311103 | 9.887577299 | 10.27139553 | 9.850618229 | 9.738352975 | 10.18693865 | 9.984247667 | 10.39510685 | 9.54373508  | 10.36674047 | 10.70473274 | 9.724050514 | 10.21890212  | 10.0303682  | 9.93892519  |
| SGK1    | 8.89530117   | 9.834530095 | 10.22340311 | 9.37811475  | 9.60247175  | 10.02858686 | 10.16232618 | 9.54243069  | 9.98243069  | 9.984247667 | 10.43333301 | 10.08483968 | 10.80575183 | 10.29668845 | 12.69159709 | 11.61932083  | 9.37218187  | 11.17177444 |
| ANAPC11 | 10.18296603  | 10.6217126  | 10.5434842  | 10.38180788 | 10.40316747 | 10.32882547 | 10.32700668 | 9.79120276  | 10.01882252 | 9.683426884 | 9.963260841 | 10.52124408 | 10.16330955 | 10.15283791 | 9.461085185 | 9.777225603  | 9.73985564  | 9.904391226 |
| RELB    | 9.59338727   | 9.799358298 | 10.47098906 | 9.577483344 | 10.04615313 | 10.2079186  | 9.961651402 | 10.5710297  | 10.43737041 | 10.02210625 | 10.77720731 | 9.93663109  | 9.622476938 | 10.34871484 | 10.46172799 | 10.21294807  | 10.10821165 | 10.39859716 |
| CLF1    | 8.678763732  | 9.779239931 | 9.188626805 | 9.35776675  | 9.27320221  | 10.8603806  | 10.9636527  | 10.4887181  | 10.90174467 | 10.30307103 | 11.6093089  | 9.399972954 | 10.01173014 | 9.504719566 | 10.43081126 | 10.99171282  | 9.93488377  | 10.70698607 |
| TMEM134 | 10.146485213 | 10.55606005 | 10.42481362 | 10.05789701 | 10.2911716  | 10.47086311 | 10.41083258 | 9.92346173  | 10.15832399 | 9.965884458 | 10.18607978 | 10.81819485 | 10.17678972 | 9.947859646 | 10.12337076 | 10.06226006  | 10.09616063 |             |
| PKNOX1  | 10.19293715  | 10.23754009 | 10.13561837 | 10.47311103 | 9.887577299 | 10.27139553 | 9.850618229 | 9.738352975 | 10.18693865 | 9.984247667 | 10.39510685 | 9.54373508  | 10.36674047 | 10.70473274 | 9.724050514 | 10.21890212  | 10.0303682  | 9.93892519  |
| SGK1    | 8.89530117   | 9.834530095 | 10.22340311 | 9.37811475  | 9.60247175  | 10.02858686 | 10.16232618 | 9.54243069  | 9.98243069  | 9.984247667 | 10.43333301 | 10.08483968 | 10.80575183 | 10.29668845 | 12.69159709 | 11.61932083  | 9.37218187  | 11.17177444 |
| ANAPC11 | 10.18296603  | 10.6217126  | 10.5434842  | 10.38180788 | 10.40316747 | 10.32882547 | 10.32700668 | 9.79120276  | 10.01882252 | 9.683426884 | 9.963260841 | 10.52124408 | 10.16330955 | 10.15283791 | 9.461085185 | 9.777225603  | 9.73985564  | 9.904391226 |
| RELB    | 9.59338727   | 9.799358298 | 10.47098906 | 9.577483344 | 10.04615313 | 10.2079186  | 9.961651402 | 10.5710297  | 10.43737041 | 10.02210625 | 10.77720731 | 9.93663109  | 9.622476938 | 10.34871484 | 10.46172799 | 10.21294807  | 10.10821165 | 10.39859716 |
| CLF1    | 8.678763732  | 9.779239931 | 9.188626805 | 9.35776675  | 9.27320221  | 10.8603806  | 10.9636527  | 10.4887181  | 10.90174467 | 10.30307103 | 11.6093089  | 9.399972954 | 10.01173014 | 9.504719566 | 10.43081126 | 10.99171282  | 9.93488377  | 10.70698607 |
| TMEM134 | 10.146485213 | 10.55606005 | 10.42481362 | 10.05789701 | 10.2911716  | 10.47086311 | 10.41083258 | 9.92346173  | 10.15832399 | 9.965884458 | 10.18607978 | 10.81819485 | 10.17678972 | 9.947859646 | 10.12337076 | 10.06226006  | 10.09616063 |             |
| PKNOX1  | 10.19293715  | 10.23754009 | 10.13561837 | 10.47311103 | 9.887577299 | 10.27139553 | 9.850618229 | 9.738352975 | 10.18693865 | 9.984247667 | 10.39510685 | 9.54373508  | 10.36674047 | 10.70473274 | 9.724050514 | 10.21890212  | 10.0303682  | 9.93892519  |
| SGK1    | 8.89530117   | 9.834530095 | 10.22340311 | 9.37811475  | 9.60247175  | 10.02858686 | 10.16232618 | 9.54243069  | 9.98243069  | 9.984247667 | 10.43333301 | 10.08483968 | 10.80575183 | 10.29668845 | 12.69159709 | 11.          |             |             |



|          |              |             |             |             |              |              |             |              |             |              |             |              |              |             |             |              |              |             |
|----------|--------------|-------------|-------------|-------------|--------------|--------------|-------------|--------------|-------------|--------------|-------------|--------------|--------------|-------------|-------------|--------------|--------------|-------------|
| VPS29    | 9.646380195  | 10.25180781 | 10.32779413 | 10.55986824 | 10.52935811  | 9.847068622  | 10.32025279 | 9.74929058   | 9.881996011 | 9.773051226  | 9.60772705  | 10.1780941   | 10.68399301  | 10.77416241 | 9.844743471 | 9.594260973  | 9.956757503  | 10.16836866 |
| COQ10B   | 10.04863953  | 9.987056698 | 10.07526315 | 10.49692372 | 9.95726042   | 10.23022843  | 9.868395475 | 9.830425703  | 10.3553129  | 9.88122588   | 10.52721924 | 9.731627946  | 9.852414264  | 10.3488934  | 10.23585886 | 10.33717515  | 9.993712567  | 10.36738837 |
| TUB8     | 10.30650029  | 10.3052642  |             | 10.0692567  | 10.0692567   | 9.841161016  | 9.998584664 | 10.04877494  | 10.18744412 | 9.97596654   | 10.2782521  | 9.701281751  | 10.58268382  | 10.29246601 | 9.89059094  | 9.57523349   | 10.09240029  |             |
| KIAA1551 | 10.27092967  | 9.554008685 | 10.07272705 | 10.28472865 | 9.524293268  | 9.58182369   | 10.40287529 | 10.01919327  | 10.31125052 | 10.00335122  | 10.47173367 | 10.05624438  | 9.92814679   | 9.893137198 | 10.10395891 | 9.895000794  | 9.871188439  | 10.59813177 |
| CIS      | 10.16204866  | 10.16204866 | 10.16204866 | 10.16204866 | 10.16204866  | 10.16204866  | 10.16204866 | 10.16204866  | 10.16204866 | 10.16204866  | 10.16204866 | 10.16204866  | 10.16204866  | 10.16204866 | 10.16204866 | 10.16204866  | 10.16204866  | 10.16204866 |
| CVH1     | 9.94537992   | 10.26402188 | 10.56634    | 10.38670691 | 10.26432168  | 10.04967411  | 10.28589055 | 10.86192087  | 10.1286057  | 9.931655494  | 10.10684876 | 9.97540531   | 10.89339941  | 9.970894951 | 9.99351154  | 10.06514717  | 10.31749535  |             |
| ZBTM20   | 10.1064652   | 10.54254512 | 10.31564259 | 10.33643613 | 10.4344472   | 10.0913527   | 9.74799055  | 9.966597123  | 10.17265465 | 10.23020171  | 10.134522   | 9.713218507  | 9.874273658  | 9.61263873  | 9.80483893  | 10.16742418  | 10.70621195  | 10.0198303  |
| TE13     | 9.707644271  | 10.03307722 | 10.41028578 | 10.41028578 | 10.779903977 | 10.166178265 | 10.60823465 | 10.30059247  | 10.00893072 | 10.48797728  | 9.988514258 | 10.3398325   | 10.077772    | 9.94183039  | 10.43678477 | 9.93261935   | 9.698822984  |             |
| TMEM140  | 10.02854882  | 10.76799415 | 10.24101019 | 9.621521435 | 9.904705338  | 4.889933137  | 9.450331387 | 9.86126358   | 10.19340687 | 10.00931817  | 10.35401329 | 9.632033341  | 9.948244119  | 10.08223594 | 10.36940048 | 10.71440306  | 10.99931162  | 10.3432741  |
| EFCB41A  | 11.0655506   | 10.58164568 |             | 9.326838266 | 9.399234772  | 9.072440044  |             |              | 9.999082374 | 9.5518493    | 10.03577588 | 10.9333199   | 9.804345849  | 9.781236469 | 10.03062862 | 10.65056772  | 10.55245324  |             |
| CCDC90B  | 10.17182072  | 10.57108509 |             | 10.42309942 | 10.18903648  | 9.991361793  | 9.467367532 | 10.04548891  | 9.828686248 | 9.785447429  | 10.52648826 | 10.47998806  | 10.49977806  | 9.47842832  | 10.47998806 | 9.981383171  | 9.988448847  | 9.9298202   |
| CUL3     | 10.964907215 | 10.67501069 |             | 9.792623818 | 10.41024328  | 10.28591162  | 10.18478962 | 10.16126005  | 9.85404751  | 10.09984279  | 9.884472708 | 9.812494345  | 9.780511331  | 9.584376644 | 10.00976098 | 10.29892081  | 10.21014945  | 10.41195399 |
| GSDM     | 10.751212654 | 10.55947877 |             | 9.996374162 | 10.12713431  | 9.836182332  | 10.51451675 | 10.0665802   | 10.0411789  | 10.14274166  | 9.99470782  | 9.826773993  | 9.79378499   | 9.896744493 | 9.544003172 | 10.39210078  | 10.31749535  |             |
| BAZ2B    | 10.068217122 | 10.2271065  |             | 9.594044026 | 10.00607623  | 10.33540646  | 9.838775434 | 10.10782472  | 10.05620525 | 9.822848413  | 9.944595551 | 9.646539921  | 9.87064761   | 10.35651342 | 9.58162022  | 10.253983    | 10.16320619  | 10.2563377  |
| LM14A    | 10.5064      | 10.06255059 |             | 9.78147063  | 9.56969015   | 9.848230889  | 10.07326983 | 10.04293282  | 10.17082058 | 10.03423623  | 10.10876896 | 10.04370722  | 10.17389492  | 10.04047386 | 9.951436966 | 10.23078331  | 9.969664171  | 10.20304844 |
| MST01    | 10.21195667  | 9.759674812 |             | 9.839121735 | 10.03226021  | 9.456161916  | 10.42175022 | 10.58153317  | 10.46557863 | 10.465162496 | 10.38681233 | 9.736438859  | 10.07175453  | 9.665597612 | 9.69197846  | 10.8427034   | 9.98546364   | 10.47482308 |
| LVSMD3   | 10.25691914  | 10.31510947 |             | 10.05174124 | 10.05949601  | 9.760850991  | 9.307932357 | 9.919683673  | 9.745913074 | 10.1692853   | 9.736908271 | 10.24418376  | 9.794172588  | 9.168106981 | 10.1958373  | 10.18983885  | 10.0503249   | 9.93090437  |
| UFL1     | 9.810925106  | 10.38249913 |             | 10.02100416 | 10.26834097  | 9.796105569  | 9.849724204 | 10.03822226  | 10.2634667  | 9.945133226  | 10.30992421 | 10.0676562   | 9.801299015  | 9.952371811 | 10.74042948 | 10.14841647  | 9.810711105  | 10.3275522  |
| CCDC88B  | 9.367048517  | 9.432688848 |             | 9.86287236  | 9.615717348  | 9.427940739  | 10.50439387 | 10.31164804  | 10.4069856  | 10.00668412  | 8.750991609 | 10.35292046  | 10.48957167  | 10.42119955 | 9.439038885 | 10.72047036  | 10.09515163  |             |
| ALB3     | 9.855091123  | 9.854919905 |             | 10.48467947 | 10.53493263  | 10.30789092  | 9.835791774 | 10.01140235  | 9.801889754 | 10.2121642   | 10.53061983 | 10.21360535  | 10.08959171  | 9.72260093  | 9.898789005 | 9.818997923  | 9.911464355  |             |
| CG140A   | 9.927242594  | 10.12086112 |             | 9.869098989 | 9.774816992  | 10.15208623  | 10.3891754  | 9.952113037  | 10.10251285 | 10.9629767   | 9.50418008  | 10.38938039  | 9.21032166   | 9.135535527 | 9.874749342 | 10.2939886   | 10.17369394  |             |
| HINT2    | 10.43829581  | 10.166704   |             | 10.45088361 | 10.10078164  | 10.4602359   | 10.50147322 | 10.454003946 | 9.83199068  | 9.551784615  | 10.74443795 | 10.18911536  | 10.46098378  | 10.4967678  | 9.54037005  | 9.78268348   | 9.548335969  | 9.750021609 |
| MLXIP    | 9.835200772  | 9.420691672 |             | 10.08285397 | 9.968341232  | 10.20232762  | 9.236229385 | 10.49984165  | 10.23070568 | 10.06000946  | 10.77935366 | 9.92534473   | 9.66838423   | 9.723630873 | 10.03864623 | 10.45849009  | 10.08195377  | 10.90235564 |
| CVS61    | 9.710191101  | 10.15145623 |             | 9.708810213 | 10.0665133   | 10.54117131  | 10.42713406 | 10.02962999  | 9.998033392 | 10.06623735  | 10.16905336 | 10.18421343  | 9.467676623  | 10.77985474 | 10.2498684  | 9.860134064  | 9.853446762  | 9.627086786 |
| STP1     | 9.873955726  | 10.27988818 |             | 10.43067085 | 10.15360007  | 10.13809959  | 10.0112354  | 9.52330511   | 9.964256214 | 10.1188973   | 9.935476322 | 10.20466084  | 9.298037132  | 9.927339805 | 10.52423466 | 10.08451886  | 9.859527596  | 10.24264631 |
| PSM3C    | 10.20137541  | 10.55660034 |             | 10.20479622 | 9.97206619   | 10.03947827  | 9.96784312  | 9.950907981  | 9.847260455 | 9.91141604   | 9.987188893 | 10.42160247  | 10.28945594  | 10.37817206 | 9.530864765 | 9.91886837   | 9.988677907  | 10.04124819 |
| WPB11    | 9.632506651  | 10.07500529 |             | 9.666188274 | 9.551573146  | 9.67788529   | 10.0184236  | 10.71995706  | 10.15153803 | 9.632633059  | 10.30879907 | 10.21653895  | 10.30262864  | 9.997706857 | 9.87048886  | 10.115400693 | 9.773125569  | 10.45531202 |
| WBP11    | 10.13283787  | 10.13283787 |             | 10.13283787 | 10.13283787  | 10.13283787  | 10.13283787 | 10.13283787  | 10.13283787 | 10.13283787  | 10.13283787 | 10.13283787  | 10.13283787  | 10.13283787 | 10.13283787 | 10.13283787  | 10.13283787  | 10.13283787 |
| VAMP2    | 10.78808775  | 10.1453827  |             | 10.34132723 | 10.0726226   | 9.896362491  | 10.2114839  | 10.30815368  | 9.725946957 | 10.11736835  | 9.697997662 | 9.57890536   | 10.96070354  | 10.35072112 | 10.47384712 | 10.96830012  | 10.10119193  | 9.792554414 |
| CHK8     | 10.05837989  | 10.16604708 |             | 10.04328413 | 9.567208405  | 9.728584213  | 10.05879446 | 10.40147743  | 9.98259322  | 9.617397447  | 10.02788418 | 9.322254471  | 10.05723261  | 10.29364088 | 10.46334548 | 10.20255338  | 9.793543143  | 10.16969467 |
| HGS      | 9.951969689  | 10.53241846 |             | 9.33215164  | 10.24047175  | 9.984148783  | 10.43382522 | 10.13340963  | 9.716304963 | 10.04436565  | 9.73162732  | 10.106997388 | 10.0392615   | 10.0210677  | 10.48980096 | 9.736952198  | 10.13200131  | 10.42014732 |
| TMX2     | 9.779539436  | 10.02791352 |             | 10.14364907 | 10.38921755  | 10.05546265  | 10.23397149 | 9.657866025  | 10.11612347 | 9.972727833  | 9.954179245 | 10.12472514  | 9.469783011  | 10.17911356 | 9.969872191 | 9.814319792  | 9.906560227  | 10.06823349 |
| PPP4C    | 10.11586375  | 10.06623802 |             | 10.1004686  | 9.94152029   | 10.2914393   | 10.07622552 | 9.607616739  | 9.756139098 | 9.72956288   | 9.820042916 | 10.00662205  | 10.1768093   | 10.6151879  | 9.625801729 | 9.711594574  | 9.602121688  | 10.3690329  |
| TBC19    | 9.293786857  | 9.110881163 |             | 10.05747245 | 9.70078807   | 9.993852057  | 9.663088445 | 10.40303449  | 10.5171794  | 10.26585867  | 10.45640406 | 9.768813618  | 10.02462718  | 9.082145685 | 10.93009619 | 10.13006751  | 10.17852898  | 9.86026394  |
| ADH2     | 10.07583652  | 10.35746532 |             | 9.946062196 | 10.35746532  | 9.946062196  | 9.946062196 | 9.946062196  | 9.946062196 | 9.946062196  | 9.946062196 | 9.946062196  | 9.946062196  | 9.946062196 | 9.946062196 | 9.946062196  | 9.946062196  | 9.946062196 |
| PCD6     | 10.909049848 | 10.59013031 |             | 9.580246514 | 10.43481207  | 10.49446447  | 10.43481207 | 9.658807354  | 9.994705583 | 9.805520771  | 9.757484927 | 10.15851976  | 10.06816026  | 9.90520974  | 9.584346476 | 9.914770746  | 10.08346362  |             |
| SLC25A32 | 9.97045466   | 9.99383658  |             | 10.2466136  | 10.47489927  | 10.67694242  | 10.04319426 | 10.42012588  | 10.03414114 | 10.07718323  | 9.96200716  | 10.71680608  | 9.949631197  | 10.44435639 | 10.57832838 | 10.02323646  | 9.547334535  | 9.806884344 |
| SETD8    | 9.493762543  | 10.03848292 |             | 10.30524121 | 9.732334396  | 9.859864024  | 10.1710317  | 10.04475173  | 10.00450028 | 10.107473582 | 10.13600702 | 10.03179143  | 9.635415938  | 10.16530706 | 10.24371789 | 10.30021047  | 10.632646825 |             |
| LMF1     | 10.49977116  | 10.7752025  |             | 10.22829629 | 10.623379642 | 10.01055308  | 10.2335143  | 10.49533436  | 9.964803379 | 10.15319234  | 10.06516529 | 10.29681848  | 10.168333196 | 10.49647359 | 9.682542143 | 9.75845906   | 9.622700757  | 9.91772939  |
| BTN2A2   | 10.88139707  | 10.46535329 |             | 10.04674631 | 9.99637831   | 9.834654986  | 10.05641627 | 10.25403331  | 10.07463651 | 9.84816485   | 10.23968453 | 9.826051542  | 9.938049707  | 10.08719572 | 10.47900345 | 9.940504534  | 10.04114054  |             |
| NCLN     | 10.11715014  | 10.13156687 |             | 9.5477623   | 9.474029832  | 10.16327561  | 9.790886869 | 10.058099    | 10.01623755 | 9.799958519  | 9.846313697 | 10.22540118  | 9.768279069  | 10.62098389 | 10.39975854 | 10.25722581  | 9.955911089  | 10.1704388  |
| GBA      | 10.02564893  | 10.10451595 |             | 10.27447025 | 10.28620029  | 10.05691237  | 9.80242563  | 9.623718297  | 9.80342875  | 9.974030294  | 9.563627329 | 10.09652399  | 9.890573745  | 10.2978489  | 10.2679953  | 9.77489281   | 10.11254732  | 10.03480762 |
| ADH2     | 10.07583652  | 10.35746532 |             | 9.946062196 | 10.35746532  | 9.946062196  | 9.946062196 | 9.946062196  | 9.946062196 | 9.946062196  | 9.946062196 | 9.946062196  | 9.946062196  | 9.946062196 | 9.946062196 | 9.946062196  | 9.946062196  | 9.946062196 |
| NEF13    | 9.731842975  | 10.03384292 |             | 10.03843234 | 10.42309965  | 10.11266053  |             |              |             |              |             |              |              |             |             |              |              |             |

|          |              |              |              |              |             |             |              |             |              |             |             |              |             |             |              |             |             |             |
|----------|--------------|--------------|--------------|--------------|-------------|-------------|--------------|-------------|--------------|-------------|-------------|--------------|-------------|-------------|--------------|-------------|-------------|-------------|
| TMEM14B  | 9.81085579   | 10.08613446  | 10.26954932  | 10.38132632  | 10.28825632 | 10.44278733 | 10.00954596  | 9.442091638 | 9.81190108   | 9.43248588  | 9.992934584 | 10.18115596  | 10.20896362 | 10.27151689 | 9.355161794  | 9.817518802 | 9.624399139 | 9.855778415 |
| CALM3    | 9.780556713  | 10.59610604  | 10.40538744  | 10.00123375  | 10.23277047 | 10.19229884 | 10.15176473  | 9.808678105 | 9.766479274  | 9.766479274 | 9.563060993 | 10.69624475  | 10.47441163 | 10.30752929 | 9.76393274   | 9.86333637  | 9.82432566  | 9.99891706  |
| DNAC15   | 10.19648616  | 9.929585229  | 9.793478656  | 9.972509799  | 10.0766888  | 10.57049911 | 9.976515626  | 9.77903006  | 9.931684435  | 9.96135193  | 10.16110441 | 10.37469091  | 10.58315951 | 10.30205111 | 9.313469937  | 9.940666785 | 10.02329405 | 10.02720829 |
| ANKRD11  | 10.52776495  | 10.81880526  | 9.657464921  | 9.573176828  | 9.828625055 | 9.890108784 | 9.296364615  | 10.00414669 | 10.00414669  | 10.32095264 | 10.11520523 | 9.23801705   | 9.78027208  | 9.624895419 | 10.43675956  | 10.25011688 | 9.994761219 | 10.1965037  |
| BK1      | 10.02701296  | 10.37013276  | 10.185146299 | 9.60112304   | 10.13666286 | 10.15802651 | 9.526647638  | 9.89065335  | 9.89065335   | 9.80946335  | 9.05487906  | 9.968687435  | 10.62145944 | 10.20423099 | 9.94130663   | 9.817093357 | 9.900148701 | 9.900148701 |
| SNAP47   | 9.707455961  | 10.4055991   | 10.48559663  | 10.11032777  | 10.11032777 | 10.11717747 | 10.651394665 | 10.08646585 | 10.08646585  | 9.800813055 | 9.991529635 | 10.33454506  | 10.20687389 | 10.00358081 | 9.450267991  | 9.691397904 | 9.792658778 | 9.30084469  |
| SCNN1B   | 9.92010076   | 10.46280034  | 9.988743002  | 9.836827429  | 9.81666675  | 9.849704816 | 10.00625249  | 9.922507849 | 10.51130069  | 10.19182793 | 10.43055334 | 10.24580809  | 9.805434999 | 10.31675359 | 9.786556999  | 10.15456566 | 10.02962438 | 9.62196787  |
| MTF3     | 10.2348848   | 10.2794288   | 10.4086974   | 10.1034938   | 10.2792448  | 10.0565413  | 10.065413    | 9.830076452 | 10.04609222  | 10.04609222 | 10.93654026 | 10.47061631  | 9.984378082 | 9.73730422  | 9.793948835  | 9.976696191 | 9.923368798 | 9.61068532  |
| KANK1    | 10.72347729  | 10.10410233  | 9.993243393  | 10.72077185  | 9.790252438 | 9.846139528 | 10.44283115  | 9.91719448  | 10.40497666  | 9.825203009 | 10.37284797 | 9.759577073  | 9.163029716 | 10.96761612 | 10.00104218  | 10.07810938 | 9.64936486  | 9.870948289 |
| CD1D     | 10.83286868  | 10.306213843 | 9.935090087  | 10.5375453   | 10.5703434  | 10.5703434  | 10.5703434   | 9.980466491 | 9.78082104   | 9.804966491 | 9.991412581 | 10.4001553   | 9.742382961 | 10.89450581 | 10.00172463  | 10.03837371 | 9.954872008 | 9.627550746 |
| POLR2E   | 10.13627508  | 10.93835265  | 10.4744007   | 10.9345587   | 10.00418789 | 10.1243754  | 10.00418789  | 10.00418789 | 10.00418789  | 10.00418789 | 9.956651748 | 9.709419458  | 10.17074003 | 10.60530978 | 9.85372215   | 9.731803978 | 9.799002703 | 9.987520244 |
| GP1      | 9.862982344  | 9.965863148  | 10.56731105  | 10.25909551  | 10.43137889 | 10.47359068 | 10.66670416  | 9.755039922 | 10.05087881  | 9.768880547 | 10.2094518  | 9.493879734  | 10.72565599 | 9.414320523 | 9.92025112   | 9.670077238 | 9.770054041 | 10.02464711 |
| HEBP2    | 10.04248884  | 10.43851209  | 9.946815648  | 10.15077211  | 10.13450111 | 10.25737302 | 9.716572812  | 9.503991553 | 9.942560185  | 9.942560185 | 10.32233051 | 10.563642122 | 10.30341728 | 9.36632603  | 9.66040865   | 9.496135027 | 9.828785    | 9.828785    |
| CNOT1    | 10.09706144  | 9.904513708  | 10.04557479  | 10.43605306  | 9.89421028  | 10.43993411 | 10.4143679   | 10.04088981 | 9.47285884   | 9.51221385  | 9.835254299 | 10.24381878  | 10.40432472 | 9.82419191  | 9.97744581   | 9.675950491 | 9.984327649 | 10.35216876 |
| DAPP1    | 9.905417466  | 10.79559629  | 10.04869343  | 9.51032068   | 9.62240098  | 9.637036754 | 9.53652472   | 10.03980218 | 10.03980218  | 9.72605617  | 10.37604403 | 9.98551767   | 9.929750037 | 9.385710297 | 10.95078866  | 10.43132818 | 10.00175869 | 10.4465261  |
| ATFH     | 10.2389708   | 9.965973959  | 10.32125534  | 10.26429235  | 10.5619788  | 9.412087076 | 10.00461806  | 9.892896649 | 10.20985336  | 9.691241778 | 9.89925885  | 10.06325848  | 10.23041904 | 9.877809231 | 9.751905303  | 10.31152545 | 9.98151256  | 9.69085867  |
| ARL6P5   | 9.960041841  | 10.48945063  | 10.9432108   | 10.0916651   | 10.56913807 | 9.724228896 | 10.12908651  | 9.702427187 | 9.952866666  | 9.741725341 | 9.790246629 | 10.5359021   | 10.32345637 | 10.02594833 | 10.06355141  | 6.891435253 | 9.292456325 | 9.723132705 |
| TBCA     | 10.08487456  | 10.06443495  | 10.12534517  | 10.43005109  | 10.04715504 | 10.06779247 | 10.2134875   | 9.269983217 | 9.807011007  | 9.41578783  | 9.83217713  | 10.29468756  | 9.937807105 | 10.28675367 | 9.986793679  | 9.543864228 | 9.537661309 | 9.347062179 |
| GMFG     | 10.5825011   | 10.32843365  | 10.47405075  | 10.3644587   | 10.01641784 | 10.2849363  | 10.05152526  | 9.66137009  | 9.968411692  | 9.718293526 | 9.786455975 | 9.746646396  | 10.31041776 | 9.759093029 | 9.01050842   | 9.90516629  | 10.09498979 | 9.65226252  |
| RNF123   | 10.06574965  | 7.351177349  | 9.903525684  | 9.380992586  | 9.73771884  | 9.74359376  | 10.34527053  | 10.38402700 | 10.866055242 | 10.5401194  | 9.290248462 | 9.01970581   | 9.411474468 | 10.01031913 | 10.50827259  | 10.07935157 | 10.32717703 | 10.61610685 |
| EMO2     | 10.37329009  | 10.38125302  | 9.759569504  | 10.36901514  | 10.27388719 | 10.15199833 | 9.843368791  | 10.22836311 | 9.977107324  | 9.853907252 | 9.979139579 | 9.73627849   | 10.05057048 | 9.493008011 | 10.1039551   | 10.0760786  | 9.96293095  | 9.86239624  |
| NUDT22   | 10.08452729  | 10.07895802  | 10.07895802  | 10.07895802  | 10.15517221 | 10.0579654  | 9.518677911  | 9.50792339  | 9.518677911  | 9.50792339  | 9.518677911 | 9.518677911  | 10.2975311  | 10.05049529 | 10.649572209 | 9.761102184 | 9.71419139  | 9.742087645 |
| HIGH     | 10.4904253   | 10.10476866  | 10.27295074  | 9.914073484  | 10.10249704 | 9.980435185 | 9.905701142  | 10.42124599 | 9.751478823  | 10.16818258 | 10.24993302 | 9.956740011  | 9.839650429 | 9.662028772 | 10.00105906  | 9.726075509 | 9.59535704  | 9.59535704  |
| MAP3K8   | 9.02846087   | 9.584403506  | 9.341851756  | 9.343746792  | 7.919182192 | 10.42080237 | 10.10810939  | 9.967464565 | 9.967464565  | 9.967464565 | 10.45913909 | 9.800656352  | 10.58818302 | 9.89555495  | 10.66738798  | 10.62487127 | 10.26063147 | 9.584575417 |
| SPSB3    | 10.07563244  | 10.06774903  | 9.988991554  | 9.909624315  | 10.06774903 | 10.39974164 | 9.40172882   | 9.950840335 | 9.575275901  | 9.988899312 | 9.661508141 | 10.48633825  | 10.47322203 | 10.82238345 | 9.97146219   | 9.83290986  | 10.11287026 | 10.01715172 |
| KCMF1    | 10.047932819 | 10.78054078  | 10.00646529  | 10.08379055  | 9.97246366  | 10.3097218  | 10.14746788  | 9.91859738  | 9.98893122   | 10.0202036  | 9.688031624 | 10.52546903  | 9.295893964 | 9.474245828 | 9.90127627   | 9.515287923 | 9.817336027 | 9.75648924  |
| NMIE1    | 9.405391409  | 10.25528756  | 9.894122667  | 9.847808408  | 10.06362968 | 9.95977949  | 10.4524164   | 10.02927267 | 9.97318175   | 9.698488882 | 10.5263114  | 10.63761599  | 10.01050869 | 10.52763217 | 9.928076255  | 9.97153677  | 10.01981407 | 9.51466824  |
| SLC30A2  | 9.75689309   | 9.53781959   | 9.75689309   | 9.75689309   | 9.75689309  | 9.75689309  | 9.75689309   | 9.75689309  | 9.75689309   | 9.75689309  | 9.75689309  | 9.75689309   | 9.75689309  | 9.75689309  | 9.75689309   | 9.75689309  | 9.75689309  | 9.75689309  |
| MTCH1    | 9.982732447  | 10.22899815  | 10.26480301  | 10.33867021  | 9.566174918 | 10.2488647  | 9.470481101  | 10.11324317 | 10.10320954  | 9.828772231 | 10.16710856 | 9.705070767  | 9.983396939 | 9.680341644 | 10.30955227  | 9.516818079 | 9.89490281  | 10.07497838 |
| CKN6     | 9.884506641  | 10.26566042  | 9.415582274  | 10.2791703   | 10.47851057 | 9.714601505 | 10.723181209 | 10.38940011 | 9.723181209  | 10.1351485  | 10.38355159 | 9.736484571  | 9.740996211 | 9.638761227 | 10.3435634   | 9.97233175  | 10.24475728 | 10.14498909 |
| RDX      | 9.795240885  | 10.29744266  | 9.717032945  | 9.951111623  | 9.67334937  | 10.668214   | 9.547811657  | 10.17172863 | 10.13459751  | 10.06272715 | 10.0251524  | 9.71805975   | 10.50208297 | 9.89086498  | 9.431275994  | 10.01211742 | 10.0666235  | 9.79663306  |
| MYO1C    | 10.00273903  | 10.12275752  | 9.198134331  | 9.995874356  | 9.709956235 | 9.81890687  | 9.58062853   | 9.3698531   | 10.68741677  | 10.2996268  | 9.01123514  | 9.615340548  | 9.654761821 | 10.35639961 | 10.22233857  | 10.42415106 | 9.996911951 | 9.996911951 |
| QSOX1    | 10.09506115  | 10.2142933   | 9.945499638  | 10.04965961  | 10.12678645 | 10.1033365  | 9.766183504  | 9.934504884 | 9.934240366  | 9.823439849 | 9.872772971 | 9.622208844  | 10.00965345 | 10.38742632 | 10.35973750  | 10.07893694 | 9.80713882  | 9.80017176  |
| PNK2     | 10.12736907  | 10.40214169  | 9.935222557  | 9.995426567  | 9.995426567 | 9.995426567 | 9.995426567  | 9.995426567 | 9.995426567  | 9.995426567 | 9.995426567 | 9.995426567  | 9.995426567 | 9.995426567 | 9.995426567  | 9.995426567 | 9.995426567 | 9.995426567 |
| SYNRG    | 10.4174249   | 9.442414917  | 9.4961727    | 9.860930856  | 10.2278907  | 10.2320921  | 9.80722282   | 9.840566619 | 9.74570664   | 9.74764375  | 9.4764375   | 9.26886732   | 9.816887021 | 9.97786567  | 9.97601291   | 10.42229213 | 10.52029888 | 10.2281745  |
| PMSE3    | 10.10549749  | 10.1132349   | 10.18960426  | 10.542156849 | 10.3241366  | 10.30418502 | 9.908064703  | 9.65965705  | 9.65965705   | 9.65965705  | 9.65965705  | 9.65965705   | 9.65965705  | 9.65965705  | 9.65965705   | 9.65965705  | 9.65965705  | 9.65965705  |
| Clc6f07C | 10.2993181   | 9.668151703  | 9.563441879  | 9.845786119  | 9.617909257 | 9.85753783  | 10.03379186  | 10.53405474 | 10.6301539   | 9.912917488 | 10.75214048 | 9.605965628  | 9.48122176  | 10.1758601  | 10.48508153  | 10.3807291  | 9.90712338  | 10.15720088 |
| EMOX2    | 10.23961705  | 10.19335931  | 9.727417574  | 9.991116263  | 9.727417574 | 10.36402487 | 1.899515011  | 9.254426324 | 9.254426324  | 9.254426324 | 9.254426324 | 9.254426324  | 9.254426324 | 9.254426324 | 9.254426324  | 9.254426324 | 9.254426324 | 9.254426324 |
| PMSE1D3  | 10.01487892  | 10.91453276  | 9.830856285  | 10.17182078  | 10.52825305 | 10.16471948 | 10.5883251   | 9.722731311 | 10.0515801   | 9.848948976 | 10.3735323  | 10.58682523  | 10.60968127 | 9.885594388 | 10.91259685  | 9.66305809  | 9.93494298  | 9.93494298  |
| CREB1    | 10.07205579  | 9.99646704   | 10.6488015   | 10.18398802  | 9.95265303  | 9.423740124 | 10.05837967  | 9.765940182 | 10.2652387   | 9.696202283 | 10.33603373 | 10.48373285  | 9.848959787 | 9.826800393 | 9.56605934   | 10.11263787 | 9.704718716 | 9.75884527  |
| HEBP2    | 9.83129249   | 9.36925928   | 9.53781959   | 9.36925928   | 9.36925928  | 9.36925928  | 9.36925928   | 9.36925928  | 9.36925928   | 9.36925928  | 9.36925928  | 9.36925928   | 9.36925928  | 9.36925928  | 9.36925928   | 9.36925928  | 9.36925928  | 9.36925928  |
| ATG3     | 10.51336356  | 10.62530162  | 9.95829745   | 10.53027208  | 10.3390093  | 10.2677064  | 9.665948343  | 10.11388305 | 9.85344612   | 9.942890871 | 10.52473836 | 9.990526277  | 9.919633562 |             |              |             |             |             |

|          |              |             |             |             |              |              |             |              |              |              |               |             |             |              |              |              |             |              |             |
|----------|--------------|-------------|-------------|-------------|--------------|--------------|-------------|--------------|--------------|--------------|---------------|-------------|-------------|--------------|--------------|--------------|-------------|--------------|-------------|
| CTH4     | 10.01007446  | 10.37717805 | 9.994719243 | 9.672237007 | 9.515915896  | 9.438966141  | 9.261090743 | 9.135066643  | 9.76389728   | 10.01014212  | 9.738180556   | 9.636675449 | 9.917388908 | 10.17968265  | 9.954831832  | 9.969351642  | 10.07876719 | 9.822595314  |             |
| UBL7     | 9.273628455  | 10.08555988 | 9.933258661 | 10.10512677 | 10.6029825   | 10.13925801  | 10.14658144 | 10.14658144  | 9.78604138   | 10.08450117  | 9.93478068    | 9.936931787 | 10.2547906  | 9.764366214  | 10.08632873  | 9.412481073  | 9.899162596 | 9.767786317  | 9.806686979 |
| NC04     | 10.15493526  | 9.255376789 | 9.679117673 | 10.07374956 | 10.33127914  | 10.32693981  | 10.32693981 | 9.667019937  | 10.04858409  | 9.716510609  | 10.23860048   | 10.04331196 | 8.326999323 | 9.275519428  | 9.802162024  | 10.01418475  | 9.854760136 | 10.59726748  | 9.9726748   |
| LMF2     | 9.919938827  | 9.813462271 | 10.08692418 | 9.83122592  | 9.822471879  | 10.27262727  | 9.734461737 | 9.851986592  | 9.980993231  | 10.010919523 | 9.963658594   | 10.00291864 | 10.38260829 | 9.945530541  | 9.988442717  | 9.61952284   | 9.843030439 | 9.72484886   | 9.934030439 |
| RLC3     | 9.934064969  | 9.934064969 | 9.934064969 | 9.74041318  | 9.7324282    | 9.7324282    | 9.7324282   | 9.7324282    | 9.7324282    | 9.7324282    | 9.7324282     | 9.7324282   | 9.7324282   | 9.7324282    | 9.7324282    | 9.7324282    | 9.7324282   | 9.7324282    | 9.7324282   |
| BR3      | 9.903138185  | 9.027611024 | 9.027611024 | 9.43882566  | 9.882131372  | 9.882131372  | 9.882131372 | 9.882131372  | 9.882131372  | 9.882131372  | 9.882131372   | 9.882131372 | 9.882131372 | 9.882131372  | 9.882131372  | 9.882131372  | 9.882131372 | 9.882131372  | 9.882131372 |
| HPCL1    | 9.800218408  | 9.90754607  | 9.611943919 | 10.04279534 | 10.28417118  | 9.962066849  | 10.28067072 | 9.953182101  | 10.21535829  | 9.97003562   | 9.879065477   | 10.23240002 | 9.903192914 | 10.61578807  | 9.785530891  | 9.853008845  | 9.791228744 | 9.58181154   | 9.8181154   |
| ZMFZ2    | 10.39354804  | 9.91175817  | 10.5848544  | 9.98566022  | 9.9742865    | 10.28458076  | 10.01192279 | 10.17554817  | 10.43686022  | 10.05579032  | 10.33588995   | 10.08462523 | 9.798182678 | 9.601597249  | 9.834129728  | 9.458581932  | 9.888657893 | 9.888657893  | 9.888657893 |
| KHLZ24   | 9.88886735   | 9.66819622  | 10.36256832 | 9.752106155 | 9.931468305  | 10.11395446  | 9.2606252   | 9.906508891  | 10.0772691   | 9.932399882  | 10.23232432   | 9.210345583 | 10.394529   | 10.875403213 | 10.16534751  | 9.928092935  | 9.93142117  | 9.94753113   | 9.94753113  |
| YYLAF1   | 9.399415096  | 10.14563114 | 9.972796544 | 10.14563114 | 9.972796544  | 10.14563114  | 9.972796544 | 10.14563114  | 9.972796544  | 10.14563114  | 9.972796544   | 10.14563114 | 9.972796544 | 10.14563114  | 9.972796544  | 10.14563114  | 9.972796544 | 10.14563114  | 10.14563114 |
| CFB8     | 9.5375127    | 10.07603656 | 9.806076586 | 9.92409795  | 10.18245656  | 9.90947508   | 9.708101555 | 9.669648146  | 9.848128716  | 10.0975713   | 10.18502338   | 9.201829478 | 9.533980227 | 10.138331278 | 10.09965432  | 9.963901225  | 9.963901225 | 10.14117866  | 9.963901225 |
| VTI8     | 10.0166229   | 9.696657958 | 9.902048798 | 10.23945245 | 10.01245656  | 9.63052303   | 9.936596478 | 9.545250154  | 9.95655827   | 10.00408886  | 9.957005184   | 10.0613699  | 10.15258954 | 9.987609179  | 9.829204504  | 9.658692355  | 9.918716004 | 9.918716004  | 9.918716004 |
| PTFC     | 9.931078684  | 8.23003273  | 9.606431559 | 9.78798026  | 9.74154396   | 9.76993352   | 10.14074294 | 9.92155155   | 9.82689559   | 9.54456777   | 10.43254515   | 10.93220273 | 10.98359017 | 10.61132365  | 10.28698174  | 10.24535015  | 10.24535015 | 10.24535015  | 10.24535015 |
| RAB11FP1 | 9.352028363  | 8.8056498   | 9.08194242  | 10.38540357 | 9.88062631   | 10.2098024   | 10.16177616 | 10.51223846  | 10.33116066  | 9.860009985  | 10.79374851   | 9.192528507 | 9.959086565 | 9.05046844   | 10.42195271  | 10.4008221   | 9.893250999 | 10.15477634  | 9.893250999 |
| PLEKH3   | 9.984560153  | 9.442314024 | 10.13356248 | 9.88151388  | 10.34812435  | 9.68855868   | 10.12750347 | 10.11774361  | 9.680788129  | 10.080119    | 9.840071868   | 9.763844548 | 9.387790197 | 9.97007035   | 10.22813299  | 9.57173514   | 9.57173514  | 9.57173514   | 9.57173514  |
| TOMM20   | 10.1054557   | 9.58534804  | 10.24297944 | 9.889828702 | 9.779706824  | 10.28212144  | 9.674178429 | 10.04838098  | 9.891290647  | 10.08699305  | 9.45232665    | 9.965798431 | 9.83432381  | 9.957981622  | 9.495624433  | 9.641024262  | 9.881080557 | 10.021865    | 9.881080557 |
| COQ8A    | 10.37863287  | 10.37863287 | 10.37863287 | 10.39943406 | 10.49612829  | 10.39943406  | 10.49612829 | 10.39943406  | 10.49612829  | 10.39943406  | 10.49612829   | 10.39943406 | 10.49612829 | 10.39943406  | 10.49612829  | 10.39943406  | 10.49612829 | 10.39943406  | 10.49612829 |
| EXOC7    | 10.59000860  | 10.59000860 | 9.856077006 | 9.856077006 | 9.856077006  | 9.856077006  | 9.856077006 | 9.856077006  | 9.856077006  | 9.856077006  | 9.856077006   | 9.856077006 | 9.856077006 | 9.856077006  | 9.856077006  | 9.856077006  | 9.856077006 | 9.856077006  | 9.856077006 |
| FNBP4    | 9.019274801  | 9.299358006 | 9.490507893 | 9.920221103 | 8.82291304   | 9.397368773  | 9.24213114  | 10.34031788  | 9.652122178  | 10.44894644  | 9.942726502   | 8.840039336 | 10.10588367 | 10.24683229  | 10.55137041  | 10.20478025  | 10.25679327 | 10.25679327  | 10.25679327 |
| ERCI     | 9.810085314  | 10.13694725 | 9.638562807 | 9.855904072 | 10.0125625   | 9.57362849   | 10.09286518 | 10.361053    | 9.910115242  | 9.910115242  | 10.0610951    | 8.984493999 | 9.98049038  | 9.850907198  | 10.14697507  | 9.647744777  | 9.41392525  | 9.795730762  | 9.795730762 |
| NDFZ4    | 9.711867573  | 10.28517487 | 10.02289877 | 9.960911532 | 10.00360746  | 10.40481439  | 10.08369996 | 9.552041929  | 9.643353221  | 9.609772384  | 9.955531534   | 8.896143185 | 9.541069898 | 9.40727875   | 9.568070561  | 9.870661225  | 10.04829943 | 10.04829943  | 10.04829943 |
| QRDL     | 9.860039875  | 9.950659025 | 10.2648108  | 9.938377448 | 10.58725155  | 10.1200616   | 10.01501187 | 9.958169042  | 9.908566564  | 9.901134335  | 9.884512128   | 10.2689992  | 9.705721912 | 9.638905958  | 9.547297402  | 10.03506363  | 10.03506363 | 10.03506363  | 10.03506363 |
| KIA03F8  | 9.53440089   | 9.434764158 | 9.587321116 | 1.958428066 | 10.592920872 | 9.735424743  | 10.23778813 | 10.10529307  | 9.878080513  | 9.927931855  | 10.11308799   | 9.91124096  | 10.26620108 | 10.04202336  | 9.982004015  | 10.14093980  | 10.16485583 | 9.78450894   | 9.78450894  |
| NDFB8    | 9.907892864  | 9.25285854  | 10.0046597  | 9.99997845  | 9.733678255  | 9.891913593  | 9.58965247  | 9.726838188  | 10.10493205  | 10.22069265  | 9.726838188   | 10.10493205 | 10.22069265 | 9.726838188  | 10.10493205  | 10.22069265  | 9.726838188 | 10.10493205  | 10.10493205 |
| NDFB2    | 10.13897078  | 10.43711806 | 9.952071092 | 9.886570192 | 9.87620223   | 10.34006105  | 10.17803005 | 9.748549183  | 9.47430906   | 9.271530602  | 9.790032027   | 10.24376005 | 9.870941391 | 10.16253346  | 9.383650368  | 9.52417302   | 9.293117432 | 10.00473182  | 10.00473182 |
| PSEN8    | 9.68650237   | 10.60607843 | 9.906720252 | 10.14233416 | 10.41816223  | 10.3061034   | 10.08964505 | 9.928761515  | 9.89622211   | 9.77492454   | 9.974274299   | 10.42206615 | 10.26977964 | 9.898583541  | 9.596895858  | 9.857572963  | 9.73829773  | 9.85714857   | 9.85714857  |
| JMUD12   | 9.710137493  | 8.66777379  | 10.27993993 | 10.07173711 | 10.28891029  | 10.12659769  | 9.163965288 | 10.60712654  | 9.488235246  | 10.08329027  | 9.93071227    | 10.14426849 | 9.850852515 | 9.706940271  | 10.14943769  | 9.728231982  | 9.904646425 | 10.20264444  | 10.20264444 |
| PKV9     | 9.35640964   | 9.35640964  | 9.35640964  | 9.35640964  | 9.35640964   | 9.35640964   | 9.35640964  | 9.35640964   | 9.35640964   | 9.35640964   | 9.35640964    | 9.35640964  | 9.35640964  | 9.35640964   | 9.35640964   | 9.35640964   | 9.35640964  | 9.35640964   | 9.35640964  |
| POMGNT1  | 10.12944189  | 9.77241849  | 9.35840692  | 10.22944189 | 10.1541406   | 10.1882389   | 9.66068319  | 10.10715359  | 9.950581277  | 9.753873439  | 9.83158413    | 10.0154423  | 10.83158413 | 9.907926702  | 9.414930202  | 10.13329448  | 9.952584131 | 9.952584131  | 9.952584131 |
| TALD01   | 10.35655092  | 10.73636378 | 10.96655139 | 10.1659351  | 10.5898931   | 9.840795428  | 10.13430825 | 9.68064339   | 10.01394143  | 9.69824406   | 10.96834096   | 10.1289259  | 9.676376744 | 8.67215886   | 9.4131347    | 9.779590788  | 9.627441031 | 9.859719067  | 9.859719067 |
| FLOT1    | 9.91236813   | 10.25576569 | 9.842287298 | 10.04815105 | 10.23759604  | 10.03887844  | 9.831380534 | 9.942993414  | 9.831380534  | 9.942993414  | 9.831380534   | 9.942993414 | 9.831380534 | 9.942993414  | 9.831380534  | 9.942993414  | 9.831380534 | 9.942993414  | 9.942993414 |
| APOL1    | 9.950191178  | 10.20128816 | 10.54040369 | 9.635061358 | 10.0875424   | 9.784071223  | 9.797021478 | 10.403995714 | 9.985154898  | 9.77597814   | 9.942993414   | 9.985154898 | 10.14193801 | 10.51698876  | 9.16158859   | 9.552451985  | 9.88304706  | 9.610230841  | 9.610230841 |
| RARS2    | 9.546537108  | 9.741323003 | 9.813965098 | 9.98707367  | 10.2041553   | 9.54807409   | 9.6046883   | 9.68604963   | 9.934619555  | 10.10253414  | 9.806207652   | 9.896029702 | 9.882433165 | 10.60259008  | 9.928466084  | 10.14620711  | 10.24275509 | 10.00730141  | 10.00730141 |
| BNP13    | 9.34777705   | 10.50786979 | 10.10239968 | 10.35589938 | 10.06187723  | 9.862359343  | 9.672433166 | 9.903802438  | 9.651309875  | 9.867813312  | 9.918442466   | 9.784141231 | 10.55891532 | 10.6353272   | 10.139913463 | 9.82340045   | 9.47723178  | 9.79325816   | 9.79325816  |
| PIF5     | 9.46510076   | 10.46510076 | 10.46510076 | 10.46510076 | 10.46510076  | 10.46510076  | 10.46510076 | 10.46510076  | 10.46510076  | 10.46510076  | 10.46510076   | 10.46510076 | 10.46510076 | 10.46510076  | 10.46510076  | 10.46510076  | 10.46510076 | 10.46510076  | 10.46510076 |
| PIEZ1    | 10.363997889 | 9.676310258 | 9.488743008 | 9.119474571 | 10.428031756 | 10.576076418 | 10.46579508 | 10.468073974 | 9.54697312   | 9.18994508   | 9.488743008   | 9.676310258 | 9.488743008 | 9.119474571  | 10.428031756 | 10.576076418 | 10.46579508 | 10.468073974 | 9.54697312  |
| USP10    | 10.15801566  | 9.24970749  | 9.50734078  | 9.410268508 | 10.32858692  | 9.325486412  | 10.4705958  | 9.847039228  | 10.0550471   | 9.903023807  | 10.08065378   | 9.981089526 | 9.722212895 | 9.59129226   | 9.913216893  | 10.19531279  | 9.813800904 | 10.07145885  | 10.07145885 |
| ZSMPTZ4  | 9.266135118  | 10.04883423 | 10.09913876 | 10.03655017 | 9.993655321  | 10.0022605   | 9.665645118 | 10.669409198 | 10.735037675 | 9.5521364    | 10.14528249   | 10.45396731 | 9.95426172  | 10.5975825   | 9.909552119  | 9.60124944   | 9.14989294  | 9.59582805   | 9.59582805  |
| FAAH2    | 9.617692162  | 9.370231342 | 10.64262835 | 9.326653256 | 10.26421966  | 10.17181639  | 10.60037239 | 9.909739087  | 10.20645038  | 10.02637787  | 9.90425595    | 9.648649306 | 11.16448629 | 9.976811461  | 9.860492376  | 9.776540115  | 9.682948906 | 9.54448572   | 9.54448572  |
| ARIH1    | 9.153535367  | 9.9012095   | 9.87388439  | 9.81180939  | 10.57250145  | 10.71332216  | 9.905405832 | 10.35610287  | 9.905405832  | 10.35610287  | 9.905405832</ |             |             |              |              |              |             |              |             |





|          |              |              |             |             |             |             |              |             |               |             |             |             |             |             |             |             |             |             |
|----------|--------------|--------------|-------------|-------------|-------------|-------------|--------------|-------------|---------------|-------------|-------------|-------------|-------------|-------------|-------------|-------------|-------------|-------------|
| TOR1AIP1 | 9.672213876  | 9.834239388  | 8.828504257 | 11.1836643  | 10.2629228  | 6.98298745  | 9.829450967  | 10.2629132  | 10.2490809    | 9.65262646  | 10.1274895  | 10.06981    | 9.564978449 | 9.291861335 | 10.47605374 | 10.12940059 | 9.806211908 | 9.778080165 |
| SCAPER   | 9.367520218  | 9.797246668  | 9.412449005 | 10.4300621  | 9.88241304  | 9.514680317 | 9.99032526   | 9.957145992 | 9.769578612   | 10.27157163 | 9.704200133 | 9.954883262 | 10.07212579 | 8.799013543 | 9.403725152 | 10.1412084  | 10.15718807 | 9.980493457 |
| ASNS     | 10.009741227 | 10.06376911  | 9.71584301  | 9.904929527 | 9.537565104 | 10.08855345 | 9.248480975  | 9.90761407  | 9.545038161   | 9.808761541 | 10.24727297 | 9.499756244 | 9.767407399 | 9.369053525 | 9.851620059 | 9.758140807 | 9.990515402 | 9.995154002 |
| RHOH     | 9.600607099  | 9.777213176  | 9.800110636 | 9.465388305 | 9.424642971 | 9.847846132 | 9.910430987  | 9.552070301 | 9.855390435   | 10.0441161  | 9.3456594   | 9.79330097  | 9.811971343 | 9.241515895 | 9.877273032 | 9.27832076  | 10.15007344 | 9.296700086 |
| C14orf1  | 10.0075440   | 10.17242369  | 9.94012651  | 9.94012651  | 9.83372561  | 9.794812651 | 9.854166596  | 9.854166596 | 9.854166596   | 9.854166596 | 9.854166596 | 9.854166596 | 9.854166596 | 9.854166596 | 9.854166596 | 9.854166596 | 9.854166596 | 9.854166596 |
| NFKB1    | 10.03321887  | 9.72828767   | 9.87373883  | 9.859298489 | 10.08607473 | 9.862544248 | 10.659207609 | 10.35730461 | 9.855368541   | 9.9625422   | 9.99552948  | 9.850535019 | 9.348238553 | 9.477447216 | 9.426564266 | 9.78306919  | 10.08983272 | 9.29267076  |
| FAM56A   | 9.782552168  | 9.879525097  | 9.951169726 | 9.836649231 | 9.979210418 | 9.834558817 | 10.22348335  | 9.626111125 | 9.804283602   | 9.414571432 | 9.887808388 | 10.0538555  | 9.606169118 | 9.866591918 | 9.238236661 | 9.65505138  | 9.52014139  | 9.820437572 |
| ASH1L    | 9.524848766  | 10.94744372  | 8.300594533 | 9.524848766 | 10.20530662 | 9.57789356  | 9.57789356   | 9.689157158 | 10.20207701   | 9.378438583 | 9.087171564 | 10.36195635 | 10.42868856 | 9.923719376 | 10.48602881 | 10.05772484 | 9.915888185 | 9.949778832 |
| IRF2BP2  | 10.10234109  | 10.17637615  | 9.7993004   | 9.804819926 | 9.526707834 | 10.32574572 | 9.945634005  | 10.33057277 | 9.835155583   | 9.501967499 | 9.717060444 | 9.274877386 | 10.18491539 | 9.68798125  | 10.48765519 | 9.813410717 | 9.324028823 | 9.395324249 |
| APOL6    | 8.865699882  | 9.472105079  | 9.478440667 | 9.478440667 | 9.408654864 | 9.529819684 | 9.529819684  | 9.529819684 | 9.529819684   | 9.529819684 | 9.529819684 | 9.529819684 | 9.529819684 | 9.529819684 | 9.529819684 | 9.529819684 | 9.529819684 | 9.529819684 |
| C14orf2  | 10.93841266  | 10.14678182  | 10.14678182 | 10.25021887 | 9.680901871 | 10.04639891 | 9.680901871  | 9.680901871 | 9.680901871   | 9.680901871 | 9.680901871 | 9.680901871 | 9.680901871 | 9.680901871 | 9.680901871 | 9.680901871 | 9.680901871 | 9.680901871 |
| RAB18    | 9.586608414  | 10.00640082  | 9.825045477 | 9.744906442 | 9.844995676 | 9.954148756 | 10.15115313  | 9.675630259 | 9.80019713    | 9.730627993 | 9.550570781 | 9.833468608 | 10.3154183  | 10.04873818 | 9.822902887 | 9.766648567 | 9.602831948 | 9.497772832 |
| TMEM98   | 10.07779767  | 10.04473179  | 9.933437556 | 9.964265291 | 9.790125176 | 10.32853204 | 9.333730042  | 9.26327248  | 9.514747924   | 9.69690003  | 10.4289866  | 10.44072777 | 9.652116665 | 9.605219366 | 9.20015467  | 9.933196347 | 9.62396347  | 9.62396347  |
| GBA2     | 9.880399399  | 9.819059457  | 9.959031314 | 9.936295474 | 8.86417197  | 9.702490646 | 9.82750638   | 10.5327505  | 9.594658852   | 10.07124357 | 9.63516504  | 10.19856784 | 9.720484561 | 9.745922575 | 10.83493829 | 9.653482488 | 10.38021011 | 10.65828118 |
| YIP4     | 10.00585888  | 9.273520975  | 10.0725844  | 9.273520975 | 9.932412906 | 9.409360111 | 9.989032319  | 9.887934869 | 10.10145367   | 9.91972101  | 9.88793827  | 9.823432327 | 9.469287153 | 9.375347081 | 9.562145134 | 10.16947676 | 9.821099888 | 9.732787578 |
| HIF1A    | 8.600207129  | 10.52705063  | 9.993843826 | 9.558216243 | 9.534206413 | 9.632813862 | 10.58570749  | 10.20122627 | 9.954767802   | 9.809851202 | 10.09986609 | 9.833973899 | 9.225110402 | 9.338573862 | 10.24374404 | 9.99341019  | 9.51933883  | 9.614769603 |
| UNC13D   | 9.851291955  | 9.29240854   | 9.656599168 | 9.34663199  | 9.830897201 | 9.712632944 | 9.782920862  | 9.874746362 | 10.08205501   | 9.81189583  | 10.27895418 | 8.674694816 | 9.533232523 | 9.945282889 | 9.836248139 | 10.17945143 | 9.554187044 | 9.554187044 |
| DCRC     | 10.12724266  | 10.2692519   | 9.9026084   | 10.36490165 | 9.82660495  | 10.20448727 | 9.82660495   | 9.85829776  | 9.74474269    | 9.75657698  | 9.549283083 | 9.855844549 | 10.4784378  | 9.618384215 | 9.339307621 | 9.763239301 | 9.703642425 | 9.703642425 |
| NDUFA9   | 9.486957876  | 10.2860204   | 10.1735995  | 10.03941959 | 10.2737859  | 10.24756127 | 9.929295886  | 9.508171046 | 9.738750885   | 9.349820147 | 9.747069562 | 9.93128562  | 10.07130829 | 9.317451891 | 9.587976538 | 9.535996412 | 10.0961933  | 10.06749934 |
| UNC93B   | 10.30631406  | 10.68304911  | 10.5166672  | 10.20232622 | 10.58743855 | 9.82459337  | 10.422258    | 9.51946901  | 9.734387133   | 9.562212421 | 9.657897234 | 9.707394974 | 10.24261399 | 10.10224495 | 9.485318503 | 9.653453062 | 9.532567447 | 9.815749427 |
| CDK4     | 10.11584807  | 10.36501074  | 9.92019042  | 9.62019042  | 10.41127676 | 9.950511376 | 9.848607656  | 9.848607656 | 9.848607656   | 9.848607656 | 9.848607656 | 9.848607656 | 9.848607656 | 9.848607656 | 9.848607656 | 9.848607656 | 9.848607656 | 9.848607656 |
| PTGES2   | 10.28324518  | 9.73791086   | 9.91862419  | 10.1003219  | 9.80972796  | 9.5348357   | 9.828426505  | 9.5348357   | 9.5348357     | 9.5348357   | 9.5348357   | 9.5348357   | 9.5348357   | 9.5348357   | 9.5348357   | 9.5348357   | 9.5348357   | 9.5348357   |
| NOZL2    | 9.77685495   | 9.824191892  | 9.935487604 | 10.35489846 | 10.04250244 | 10.26763578 | 9.946828162  | 9.796313242 | 9.778036215   | 9.94803161  | 9.755421878 | 10.26987901 | 8.867942731 | 9.802350017 | 9.891335211 | 9.748832226 | 9.805436385 | 9.810543622 |
| KOM5A    | 9.938453019  | 9.60847589   | 9.97199657  | 10.2679102  | 10.3319243  | 9.532438179 | 9.787957975  | 9.648624101 | 9.845639069   | 9.380557165 | 10.04853228 | 10.85827872 | 9.729478046 | 9.678319929 | 10.13963762 | 9.753371719 | 9.91296376  | 9.753371719 |
| SNRPD1   | 9.823259084  | 10.26741705  | 9.654396148 | 9.997414085 | 10.03374386 | 10.10476789 | 9.892242485  | 9.140466659 | 9.456450944   | 9.10409704  | 9.488193906 | 10.48525004 | 10.02461542 | 9.917683799 | 9.156604891 | 9.410418927 | 9.187104687 | 9.811199282 |
| MAPK13   | 10.20099474  | 10.10285838  | 10.04463544 | 10.11288905 | 9.84733539  | 9.795184579 | 9.836792983  | 9.604522004 | 9.604716899   | 9.465563318 | 9.98673581  | 9.605290078 | 9.676152112 | 10.44239835 | 9.584474354 | 9.608499976 | 9.368781797 | 9.935925967 |
| ARGF2F   | 9.388063265  | 9.767944838  | 9.308254215 | 8.846917238 | 10.03864305 | 9.833713971 | 9.760538674  | 9.861955599 | 10.27484478   | 10.36754952 | 10.2827743  | 9.10769716  | 9.065790152 | 10.25077807 | 9.514068811 | 10.12856372 | 10.16567723 | 9.52572857  |
| TMEM22   | 10.0075440   | 10.17242369  | 9.94012651  | 9.94012651  | 9.83372561  | 9.794812651 | 9.854166596  | 9.854166596 | 9.854166596   | 9.854166596 | 9.854166596 | 9.854166596 | 9.854166596 | 9.854166596 | 9.854166596 | 9.854166596 | 9.854166596 | 9.854166596 |
| ELAVL1   | 10.05134761  | 9.86992905   | 9.95612152  | 10.05134761 | 9.86992905  | 9.95612152  | 10.05134761  | 9.86992905  | 9.95612152    | 10.05134761 | 9.86992905  | 9.95612152  | 10.05134761 | 9.86992905  | 9.95612152  | 10.05134761 | 9.86992905  | 9.95612152  |
| IL2RA1   | 9.095369537  | 9.738822636  | 10.15915612 | 9.460779094 | 9.896551524 | 10.03828488 | 9.089205846  | 9.87353244  | 9.837603792   | 9.527078853 | 10.08236509 | 8.53546956  | 10.55295819 | 10.59571027 | 9.987956757 | 9.785230814 | 9.467571104 | 9.652550219 |
| NDUFA12  | 9.717125734  | 9.980462669  | 9.980462669 | 9.460779094 | 9.896551524 | 10.03828488 | 9.089205846  | 9.87353244  | 9.837603792   | 9.527078853 | 10.08236509 | 8.53546956  | 10.55295819 | 10.59571027 | 9.987956757 | 9.785230814 | 9.467571104 | 9.652550219 |
| ANKRD36  | 9.741619234  | 9.348318174  | 9.848757077 | 9.569458722 | 9.959881053 | 9.579417075 | 9.704562539  | 10.63808468 | 9.810063481   | 10.4806897  | 10.12874512 | 9.004234169 | 9.80714585  | 10.44657656 | 10.8470328  | 10.45925304 | 10.64352611 | 10.26537907 |
| C12orf59 | 10.05423694  | 10.1651267   | 9.517308099 | 10.22436202 | 9.564552523 | 9.37620247  | 9.767174562  | 9.295101011 | 9.47110939    | 9.767378729 | 10.38490263 | 10.74473218 | 9.740330162 | 10.02626924 | 9.848108674 | 9.81063521  | 9.785997289 | 9.785997289 |
| ARHGAP15 | 9.819028873  | 10.037612029 | 9.999929981 | 9.485417381 | 10.18172301 | 9.79618352  | 10.0931084   | 9.53726672  | 9.699215001   | 9.160426194 | 9.364222448 | 9.93179321  | 10.09206738 | 10.68350277 | 9.641093132 | 9.839497607 | 9.589471637 | 9.600665781 |
| TMEM22   | 10.0075440   | 10.17242369  | 9.94012651  | 9.94012651  | 9.83372561  | 9.794812651 | 9.854166596  | 9.854166596 | 9.854166596   | 9.854166596 | 9.854166596 | 9.854166596 | 9.854166596 | 9.854166596 | 9.854166596 | 9.854166596 | 9.854166596 | 9.854166596 |
| COX7B    | 9.734943819  | 10.05466022  | 10.12807816 | 10.12807816 | 10.05466022 | 10.12807816 | 10.05466022  | 10.12807816 | 10.05466022   | 10.12807816 | 10.05466022 | 10.12807816 | 10.05466022 | 10.12807816 | 10.05466022 | 10.12807816 | 10.05466022 | 10.12807816 |
| SACM1L   | 9.756062173  | 9.603718418  | 9.893526886 | 10.3437412  | 9.515540661 | 10.13284903 | 9.934899197  | 9.635893518 | 9.714939066   | 9.760594331 | 9.673605543 | 9.964695476 | 9.335911328 | 10.52703505 | 9.386656469 | 9.887862335 | 9.87471464  | 9.847498427 |
| QARS     | 10.01296368  | 10.01537792  | 9.639061964 | 9.410166278 | 9.885673426 | 9.799922823 | 9.805804268  | 10.0379756  | 9.608313388   | 9.772443173 | 9.939918759 | 9.85561789  | 9.283526297 | 9.399501303 | 9.776647212 | 9.69587268  | 9.847923842 | 9.99543754  |
| JMID8    | 9.821140248  | 10.01505569  | 9.432128247 | 10.05635401 | 10.40283266 | 9.986981607 | 10.22857516  | 9.593957363 | 9.783813628   | 9.504988906 | 9.697172884 | 10.02868184 | 10.10264283 | 9.60948854  | 9.531020947 | 9.849600078 | 9.336272981 | 9.429982228 |
| ACTR10   | 9.856811374  | 10.02903813  | 9.079162017 | 10.02903813 | 9.079162017 | 10.02903813 | 9.079162017  | 10.02903813 | 9.079162017   | 10.02903813 | 9.079162017 | 10.02903813 | 9.079162017 | 10.02903813 | 9.079162017 | 10.02903813 | 9.079162017 | 10.02903813 |
| ANKK2    | 9.95903374   | 10.42599336  | 10.42599336 | 9.77720118  | 9.751595186 | 9.823993266 | 9.823993266  | 9.769930759 | 9.59938826    | 9.626165422 | 10.01323553 | 9.324607369 | 10.30804116 | 10.40851271 | 10.11731845 | 10.14042695 | 9.67236300  | 10.05504314 |
| FLNA     | 9.994503453  | 10.1621359   | 9.405758933 | 9.1211639   | 9.045512482 | 9.624391462 | 9.66645598   | 10.7164522  | 9.782593483</ |             |             |             |             |             |             |             |             |             |

|          |             |              |             |             |             |              |             |             |             |             |             |              |             |             |             |             |             |             |
|----------|-------------|--------------|-------------|-------------|-------------|--------------|-------------|-------------|-------------|-------------|-------------|--------------|-------------|-------------|-------------|-------------|-------------|-------------|
| PUM1     | 8.931619166 | 9.648953387  | 9.176033768 | 9.613707786 | 9.78669986  | 9.61271782   | 9.693126158 | 9.946256836 | 10.20257784 | 10.18118229 | 10.10064167 | 9.675354325  | 9.566245599 | 9.741318637 | 9.903293782 | 10.34840425 | 9.94922622  | 9.956749993 |
| CDK14    | 9.259498436 | 10.79486892  | 9.945388774 | 10.11255168 | 9.315551694 | 9.859070424  | 9.690923842 | 10.0709263  | 9.512256517 | 9.46554794  | 9.774026236 | 9.802083964  | 9.57346867  | 9.80627753  | 9.998297183 | 9.158834388 | 9.752458378 | 9.776734226 |
| LMP      | 9.775780876 | 10.23300772  | 9.531243579 | 9.624571174 | 9.861260491 | 9.862670884  | 9.43759967  | 9.04527199  | 9.52894267  | 9.26501682  | 9.740192074 | 9.750066699  | 9.095131705 | 9.853180188 | 9.950858761 | 9.102890929 | 9.814068384 | 9.528615215 |
| NMBP121  | 10.38093614 | 9.524857143  | 10.72038284 | 9.914329109 | 10.16614913 | 9.475801952  | 9.574302343 | 9.52082894  | 9.737032696 | 9.60453196  | 10.44616868 | 10.00776319  | 9.72097379  | 9.375949614 | 9.788064348 | 10.07722926 | 9.887736444 | 9.887736444 |
| USM      | 9.385770864 | 9.465710711  | 9.078909017 | 9.064320318 | 9.45454508  | 9.30414096   | 9.822628288 | 9.67546696  | 9.70953224  | 9.956159628 | 9.370873508 | 10.453525456 | 9.80146151  | 10.07057471 | 9.896546089 | 9.370873508 | 9.896546089 | 9.370873508 |
| SNK27    | 10.00362128 | 10.0095805   | 9.120673643 | 9.120673643 | 9.91743515  | 9.91743515   | 9.91743515  | 9.867727786 | 9.867727786 | 9.867727786 | 9.867727786 | 9.867727786  | 9.867727786 | 9.867727786 | 9.867727786 | 9.867727786 | 9.867727786 | 9.867727786 |
| UBE2Q2   | 9.073755373 | 9.650363662  | 9.837843077 | 9.948331266 | 10.14433209 | 9.70486135   | 9.05625501  | 10.01947047 | 9.719159057 | 9.848193885 | 9.95120888  | 9.753007708  | 9.35858017  | 9.819522896 | 9.75233742  | 9.698629514 | 9.587781394 | 9.818319817 |
| ATG101   | 10.10109586 | 9.650994962  | 9.099395616 | 9.243890353 | 9.539165129 | 9.956584583  | 10.11341345 | 9.756662826 | 9.861622541 | 9.938400752 | 9.989119379 | 10.58510845  | 9.627500046 | 9.706796035 | 9.766280794 | 9.424886669 | 9.424886669 | 9.424886669 |
| LY96     | 9.808676894 | 9.98384569   | 9.986675774 | 9.500094943 | 10.06512142 | 10.18271201  | 10.25414028 | 9.377714697 | 9.588961838 | 9.033088074 | 9.587033827 | 10.03175134  | 10.04140137 | 9.389951909 | 9.484594075 | 9.59530265  | 9.714133977 | 9.603182167 |
| RAD17    | 10.09427175 | 9.537542409  | 9.537542409 | 9.537542409 | 9.537542409 | 9.537542409  | 9.537542409 | 9.537542409 | 9.537542409 | 9.537542409 | 9.537542409 | 9.537542409  | 9.537542409 | 9.537542409 | 9.537542409 | 9.537542409 | 9.537542409 | 9.537542409 |
| PSMD12   | 9.96992483  | 9.740640907  | 9.578265841 | 10.10223983 | 10.20419826 | 10.00768483  | 9.762132089 | 9.762132089 | 9.762132089 | 9.762132089 | 9.762132089 | 9.762132089  | 9.762132089 | 9.762132089 | 9.762132089 | 9.762132089 | 9.762132089 | 9.762132089 |
| ATPV16F  | 9.507771889 | 9.82202286   | 9.625015875 | 9.825015875 | 9.825015875 | 9.825015875  | 9.825015875 | 9.825015875 | 9.825015875 | 9.825015875 | 9.825015875 | 9.825015875  | 9.825015875 | 9.825015875 | 9.825015875 | 9.825015875 | 9.825015875 | 9.825015875 |
| ET1      | 9.633139644 | 9.743336013  | 10.13079718 | 9.3281235   | 9.50452721  | 9.411787594  | 10.00220487 | 9.59664206  | 9.59664206  | 9.59664206  | 9.59664206  | 9.59664206   | 9.59664206  | 9.59664206  | 9.59664206  | 9.59664206  | 9.59664206  | 9.59664206  |
| DNT1P2   | 8.823706095 | 10.13623731  | 9.3902432   | 9.62165827  | 9.90255975  | 9.905740044  | 10.0340573  | 9.546394491 | 9.760705203 | 9.482586091 | 9.413120703 | 9.75534771   | 10.4201845  | 10.08984763 | 10.0186008  | 9.94583951  | 9.47899222  | 9.756791973 |
| ERIN     | 10.08941134 | 10.07675494  | 9.590690356 | 10.19999135 | 9.396524158 | 9.790722688  | 9.689987709 | 9.689987709 | 9.689987709 | 9.689987709 | 9.689987709 | 9.689987709  | 9.689987709 | 9.689987709 | 9.689987709 | 9.689987709 | 9.689987709 | 9.689987709 |
| LAMTOR5  | 9.739966757 | 10.26128247  | 9.774586883 | 9.892770423 | 9.96780941  | 9.9118513    | 10.00904303 | 9.453235348 | 9.937543018 | 9.431693229 | 9.624874913 | 9.638538228  | 10.42836228 | 10.04482817 | 9.19724284  | 9.373410592 | 9.49594952  | 9.729757273 |
| DCP1A    | 9.393120464 | 10.32445717  | 9.824902769 | 10.11294816 | 10.1208982  | 9.8562669594 | 9.780006667 | 9.73630451  | 9.432209075 | 9.617450151 | 9.83444193  | 9.906068829  | 9.176979454 | 9.422240303 | 9.73361508  | 9.936146859 | 9.438864654 | 9.842175897 |
| BGAL17   | 9.780181119 | 9.720371168  | 9.720371168 | 9.720371168 | 9.720371168 | 9.720371168  | 9.720371168 | 9.720371168 | 9.720371168 | 9.720371168 | 9.720371168 | 9.720371168  | 9.720371168 | 9.720371168 | 9.720371168 | 9.720371168 | 9.720371168 | 9.720371168 |
| SMARCD2  | 10.23818309 | 10.25237965  | 10.26589427 | 9.993648565 | 10.18513929 | 9.91538966   | 9.997380697 | 9.452575261 | 9.583977619 | 9.596307298 | 9.376644203 | 10.00400022  | 10.02628896 | 9.563547616 | 9.458515607 | 9.563429686 | 9.501571122 | 9.459770063 |
| ZNF24    | 10.02502349 | 9.549612867  | 9.707396233 | 10.25515882 | 9.963794898 | 9.775739662  | 9.889488356 | 9.752007397 | 9.734500638 | 9.752590767 | 9.579962036 | 10.1108025   | 9.282044448 | 9.705423504 | 10.289199   | 9.562473429 | 9.758467085 | 9.758467085 |
| ALG1     | 10.21762473 | 10.48232469  | 9.71814823  | 9.588414659 | 10.16841529 | 9.860789068  | 9.760534225 | 9.760534225 | 9.760534225 | 9.760534225 | 9.760534225 | 9.760534225  | 9.760534225 | 9.760534225 | 9.760534225 | 9.760534225 | 9.760534225 | 9.760534225 |
| NFLC1    | 9.64665919  | 10.24571423  | 10.54956909 | 10.55953959 | 9.893024558 | 9.695470007  | 9.98509081  | 9.700240024 | 9.65393217  | 9.65393217  | 9.65393217  | 9.65393217   | 9.65393217  | 9.65393217  | 9.65393217  | 9.65393217  | 9.65393217  | 9.65393217  |
| TSY11    | 9.63059583  | 10.02710459  | 9.255242587 | 10.16452182 | 10.29594243 | 9.66643756   | 9.691569043 | 9.500052452 | 9.98029298  | 9.406313806 | 9.986118696 | 9.816983997  | 10.36190581 | 10.00227835 | 9.385846998 | 10.09892499 | 9.495750768 | 9.67975223  |
| STX5     | 10.09904159 | 10.1847292   | 9.857071632 | 9.915360524 | 10.06482585 | 9.874248734  | 9.597254086 | 9.247848358 | 9.90078479  | 9.569412984 | 10.07468664 | 10.20995565  | 9.397073094 | 10.20995565 | 9.397073094 | 9.563225252 | 9.10569883  | 9.10569883  |
| CLK4     | 9.784278197 | 9.576365559  | 9.497896558 | 9.854077216 | 9.750995841 | 10.08714687  | 9.888724336 | 9.655161357 | 9.964565532 | 9.738964489 | 9.58471486  | 9.402747744  | 9.756240689 | 9.793767141 | 9.876084172 | 9.818697922 | 9.665712992 | 9.58986282  |
| FIS1     | 10.13086022 | 9.804284946  | 10.17929704 | 10.17929704 | 10.17929704 | 10.17929704  | 10.17929704 | 10.17929704 | 10.17929704 | 10.17929704 | 10.17929704 | 10.17929704  | 10.17929704 | 10.17929704 | 10.17929704 | 10.17929704 | 10.17929704 | 10.17929704 |
| NRAS     | 10.41863335 | 9.95638123   | 9.747169971 | 10.14975403 | 9.71203087  | 9.408479421  | 10.20728915 | 9.927496835 | 10.41700341 | 9.687175509 | 10.15830054 | 9.661354444  | 8.286669696 | 9.906717941 | 10.07073191 | 9.74987284  | 9.641165085 | 9.752147047 |
| USP1     | 9.32229264  | 9.465710711  | 9.465710711 | 9.465710711 | 9.465710711 | 9.465710711  | 9.465710711 | 9.465710711 | 9.465710711 | 9.465710711 | 9.465710711 | 9.465710711  | 9.465710711 | 9.465710711 | 9.465710711 | 9.465710711 | 9.465710711 | 9.465710711 |
| RNASEH2B | 9.609991343 | 10.2496833   | 10.7059837  | 10.20077394 | 9.52529462  | 9.52529462   | 9.52529462  | 9.52529462  | 9.52529462  | 9.52529462  | 9.52529462  | 9.52529462   | 9.52529462  | 9.52529462  | 9.52529462  | 9.52529462  | 9.52529462  | 9.52529462  |
| JMJD6    | 10.0972886  | 9.95457355   | 9.849196042 | 9.079186658 | 9.645439949 | 9.830254533  | 9.745451286 | 9.709260178 | 9.763773344 | 9.402848602 | 9.602817665 | 9.794372524  | 9.983988839 | 10.05449314 | 9.768356677 | 9.218721477 | 9.182281188 | 9.747389143 |
| ZC3H13   | 10.2384649  | 10.2505023   | 10.07998526 | 10.20988062 | 9.45636957  | 9.625974034  | 9.520282592 | 9.348607924 | 9.520282592 | 9.348607924 | 9.520282592 | 9.348607924  | 9.520282592 | 9.348607924 | 9.520282592 | 9.348607924 | 9.520282592 | 9.348607924 |
| TRIM69   | 9.742113041 | 10.029372652 | 9.490355481 | 9.574104174 | 10.13456465 | 9.963189608  | 9.811308709 | 9.856211384 | 9.958864378 | 9.95823135  | 9.661564926 | 9.412429498  | 9.623468968 | 10.14734625 | 9.597842103 | 9.744480713 | 9.97356589  | 9.419938505 |
| ZFAND6   | 9.861531101 | 9.50191953   | 9.889907806 | 9.70285956  | 10.28808521 | 9.537404962  | 9.537404962 | 9.537404962 | 9.537404962 | 9.537404962 | 9.537404962 | 9.537404962  | 9.537404962 | 9.537404962 | 9.537404962 | 9.537404962 | 9.537404962 | 9.537404962 |
| CORDC1   | 9.14188666  | 9.718544667  | 9.753703909 | 9.783185226 | 9.330670381 | 10.27327958  | 9.728752152 | 10.25482361 | 9.204830053 | 9.924291768 | 10.13464347 | 9.674547915  | 10.06842572 | 9.703298838 | 10.42644398 | 9.450433404 | 9.574170457 | 9.866991949 |
| NRW1     | 9.91119262  | 9.641704876  | 9.74232345  | 10.02707232 | 9.397334922 | 9.279259863  | 10.0715698  | 9.712557123 | 9.29454582  | 9.92854298  | 9.739464477 | 9.98246008   | 9.93779115  | 8.675612555 | 9.542831979 | 9.74528066  | 9.84865568  | 9.74528066  |
| CDK17    | 9.90595768  | 9.834575828  | 9.987712338 | 9.943274623 | 9.140324621 | 9.170324621  | 9.170324621 | 9.170324621 | 9.170324621 | 9.170324621 | 9.170324621 | 9.170324621  | 9.170324621 | 9.170324621 | 9.170324621 | 9.170324621 | 9.170324621 | 9.170324621 |
| ABC1     | 9.554451097 | 9.447964714  | 10.1186261  | 9.752838109 | 9.726784664 | 9.99707851   | 9.757925421 | 9.803935649 | 9.586459762 | 9.6465789   | 9.808241727 | 10.01045459  | 9.360227886 | 9.328371135 | 10.02115534 | 9.860953893 | 9.622895114 | 9.346833139 |
| SMARCA2  | 9.114091428 | 9.847466537  | 9.552490667 | 9.552490667 | 9.552490667 | 9.552490667  | 9.552490667 | 9.552490667 | 9.552490667 | 9.552490667 | 9.552490667 | 9.552490667  | 9.552490667 | 9.552490667 | 9.552490667 | 9.552490667 | 9.552490667 | 9.552490667 |
| ABC3     | 9.159679156 | 9.599719068  | 10.2289274  | 9.710076318 | 9.710076318 | 9.710076318  | 9.710076318 | 9.710076318 | 9.710076318 | 9.710076318 | 9.710076318 | 9.710076318  | 9.710076318 | 9.710076318 | 9.710076318 | 9.710076318 | 9.710076318 | 9.710076318 |
| MAN1B1   | 9.645336961 | 10.1789932   | 9.71578873  | 9.71578873  | 9.71578873  | 9.71578873   | 9.71578873  | 9.71578873  | 9.71578873  | 9.71578873  | 9.71578873  | 9.71578873   | 9.71578873  | 9.71578873  | 9.71578873  | 9.71578873  | 9.71578873  | 9.71578873  |
| GPX1     | 9.725962188 | 9.875989665  | 9.71578873  | 9.71578873  | 9.71578873  | 9.71578873   | 9.71578873  | 9.71578873  | 9.71578873  | 9.71578873  | 9.71578873  | 9.71578873   | 9.71578873  | 9.71578873  | 9.71578873  | 9.71578873  | 9.71578873  | 9.71578873  |
| NMT      | 9.960652904 | 9.61566456   | 9.791711077 | 10.08479617 | 9.97026516  | 10.054116526 | 9.24571167  | 9.326589038 | 9.737397374 | 9.3174506   |             |              |             |             |             |             |             |             |

|            |             |             |             |              |             |             |             |             |             |             |             |             |             |             |             |             |              |             |
|------------|-------------|-------------|-------------|--------------|-------------|-------------|-------------|-------------|-------------|-------------|-------------|-------------|-------------|-------------|-------------|-------------|--------------|-------------|
| ZFP36L1    | 9.710551812 | 9.645661709 | 10.75883369 | 8.941984513  | 10.0786667  | 10.65640251 | 10.20698673 | 9.071956631 | 9.114463699 | 8.46252125  | 10.06625965 | 10.03041392 | 11.15494752 | 9.713243437 | 9.551624204 | 8.964530211 | 8.573444652  | 10.22262168 |
| PIN1       | 9.944304081 | 9.884701866 | 8.828948013 | 9.94400255   | 9.94004025  | 8.85021455  | 9.58048276  | 9.250778464 | 9.558255396 | 9.457635354 | 9.368710735 | 9.87217891  | 10.36466693 | 10.32072389 | 9.261535633 | 9.321271234 | 9.541409256  | 9.593758614 |
| SCRN2      | 10.13662388 | 10.16671136 | 9.695058979 | 9.655920376  | 9.58565731  | 10.12879593 | 9.488899249 | 9.726438077 | 9.573366664 | 9.476380777 | 9.514478902 | 9.680457502 | 10.03563907 | 10.15177779 | 9.552080374 | 9.531665946 | 8.926903277  | 9.796866864 |
| CTNN1A     | 10.01500661 | 9.703010581 | 9.856268781 | 9.934034671  | 9.863072045 | 9.419194255 | 9.705867249 | 9.525090835 | 9.715359719 | 9.573085538 | 9.961076786 | 10.02866493 | 9.344717491 | 9.991154272 | 9.581482995 | 10.00553161 | 10.20059016  | 9.578069599 |
| ITPS       | 9.57806589  | 9.851497262 | 9.821497046 | 9.93090449   | 9.452083403 | 9.60990449  | 9.452083403 | 9.550816981 | 9.830359857 | 9.830359857 | 9.830359857 | 9.830359857 | 9.830359857 | 9.830359857 | 9.830359857 | 9.830359857 | 9.830359857  | 9.830359857 |
| MAC1       | 9.235154192 | 9.785178421 | 8.830305078 | 8.830305078  | 8.830305078 | 8.830305078 | 8.830305078 | 8.830305078 | 8.830305078 | 8.830305078 | 8.830305078 | 8.830305078 | 8.830305078 | 8.830305078 | 8.830305078 | 8.830305078 | 8.830305078  | 8.830305078 |
| TOLR3GL    | 10.32298101 | 10.36036375 | 10.0456377  | 10.42571339  | 9.54584363  | 9.763639276 | 10.2863904  | 9.041498854 | 9.368274488 | 9.196358957 | 9.740550057 | 10.06601318 | 10.6522187  | 10.56198552 | 9.479674681 | 9.466335105 | 9.332849655  | 9.403304078 |
| TNKR1D     | 9.568834778 | 9.68839103  | 10.1657636  | 10.85737958  | 9.842837594 | 9.324105232 | 10.25061462 | 9.78537958  | 9.452947489 | 9.4011609   | 9.92950835  | 10.08495819 | 9.801186576 | 9.612533642 | 9.86943152  | 9.59864195  | 9.13518211   | 10.1735023  |
| PARP4      | 10.06923627 | 9.268628693 | 8.755113355 | 9.237114384  | 8.724625864 | 9.663858487 | 9.660084375 | 9.850861422 | 9.571842025 | 9.506639743 | 9.905052309 | 10.12440719 | 9.486515477 | 9.752606411 | 9.911351394 | 10.15991209 | 10.10195408  | 9.86785517  |
| USP8       | 10.06794942 | 9.894941188 | 9.887507854 | 9.868507854  | 9.757150217 | 9.395605805 | 9.784710083 | 9.640559825 | 9.587951116 | 9.48017327  | 9.599654293 | 10.20263373 | 9.667600299 | 9.91833606  | 9.91833606  | 9.91833606  | 9.91833606   | 9.91833606  |
| PPP1R12A   | 9.93762925  | 9.708147636 | 9.802239105 | 9.802239105  | 9.708147636 | 9.802239105 | 9.802239105 | 9.802239105 | 9.802239105 | 9.802239105 | 9.802239105 | 9.802239105 | 9.802239105 | 9.802239105 | 9.802239105 | 9.802239105 | 9.802239105  | 9.802239105 |
| WDR58      | 9.542089226 | 9.473004157 | 10.06965237 | 9.72723905   | 9.6884466   | 10.0664895  | 9.434960665 | 9.482856991 | 9.56672777  | 9.87184188  | 9.90792201  | 9.517895054 | 10.15232553 | 9.73029651  | 9.826881325 | 9.596504576 | 9.904540314  | 9.467835517 |
| PNPLA8     | 9.313821698 | 8.908560428 | 9.979885029 | 9.90363699   | 9.64058778  | 9.465176408 | 9.752441467 | 9.436421722 | 9.947768552 | 9.741264697 | 9.60368487  | 10.26186102 | 9.75165774  | 9.479384423 | 9.79325026  | 9.763141982 | 9.763141982  | 9.763141982 |
| HLA15      | 10.26908147 | 10.13906617 | 9.560421007 | 9.560421007  | 9.560421007 | 9.560421007 | 9.560421007 | 9.560421007 | 9.560421007 | 9.560421007 | 9.560421007 | 9.560421007 | 9.560421007 | 9.560421007 | 9.560421007 | 9.560421007 | 9.560421007  | 9.560421007 |
| SDHC       | 9.920298371 | 9.990908482 | 9.588362075 | 10.258112655 | 10.34968231 | 9.852403244 | 9.704232318 | 9.46381669  | 9.79637437  | 9.484277115 | 9.979186987 | 9.943419489 | 9.17574852  | 9.471319462 | 9.540207386 | 9.703665651 | 9.371805064  | 9.497352224 |
| BHLH1E1    | 9.139317048 | 10.3077427  | 9.623132852 | 9.49565706   | 9.968938663 | 9.22078552  | 9.644661253 | 10.62050564 | 9.72491075  | 10.0458276  | 9.582437074 | 9.112641314 | 9.748833142 | 9.62241138  | 10.12258146 | 8.98048332  | 9.815627525  | 9.938972166 |
| CAP2B      | 9.411154326 | 10.40644002 | 9.935783678 | 9.9768973891 | 9.723962975 | 9.609749521 | 9.823588333 | 9.24743194  | 9.406564057 | 9.013390417 | 9.50694185  | 9.82080647  | 9.87796206  | 10.21609636 | 9.419992943 | 9.68268044  | 9.145732031  | 9.885061539 |
| EIF2A      | 9.806153965 | 9.367013865 | 9.639830397 | 9.763402465  | 9.842504569 | 9.731701151 | 9.713640579 | 9.568195261 | 9.692004429 | 9.59021224  | 9.523760378 | 10.59493397 | 9.788327833 | 9.931261174 | 9.769733955 | 9.807244849 | 9.602281628  | 9.602281628 |
| TUBGCP2    | 9.710510582 | 10.09819    | 9.568602967 | 9.772022873  | 9.639404627 | 8.884361052 | 9.929024103 | 9.54175415  | 10.08639747 | 9.94074873  | 9.66389446  | 10.10319255 | 10.55975456 | 9.832302778 | 9.506041001 | 9.69545004  | 9.423446199  | 9.423446199 |
| TNEM107    | 9.501544075 | 9.79822619  | 9.86316543  | 9.728113477  | 9.40254662  | 10.19758951 | 9.982353526 | 9.67682302  | 9.432917652 | 9.27079888  | 9.982326661 | 10.22618116 | 9.97826759  | 9.492339445 | 9.656658811 | 9.942007835 | 9.524486094  | 9.524486094 |
| CHTF6      | 9.858961274 | 9.31731607  | 9.996508922 | 9.961498163  | 9.555747161 | 9.55109525  | 10.02083074 | 9.601583635 | 9.978452609 | 9.824059633 | 9.70562048  | 9.699711287 | 9.580622744 | 9.344790389 | 9.713847188 | 9.653323166 | 9.400449391  | 9.400449391 |
| SLU7       | 9.409050015 | 9.87659706  | 9.381015875 | 9.37879898   | 9.430838806 | 10.17108956 | 10.01001108 | 10.07846007 | 9.601451362 | 9.071798738 | 9.96514797  | 10.25806814 | 9.65645315  | 9.83108743  | 9.673837022 | 9.888037165 | 9.623249874  | 9.623249874 |
| REXO2      | 9.86773941  | 10.27512526 | 9.941808779 | 10.09833801  | 8.879728046 | 9.994665009 | 9.720536411 | 9.270843257 | 9.44991698  | 9.39136611  | 9.298956974 | 10.29713293 | 9.967873559 | 9.684353689 | 9.316541337 | 9.61148952  | 9.527197596  | 9.540114629 |
| FBOX32     | 9.59056439  | 8.276678482 | 9.609078201 | 9.711964627  | 8.760958063 | 9.691659559 | 10.45661071 | 9.873915792 | 9.85133600  | 10.35244122 | 8.838483688 | 9.840272966 | 9.100512664 | 10.38283099 | 10.01539464 | 9.975501842 | 9.528853124  | 9.528853124 |
| C14orf159  | 9.399959104 | 9.37192543  | 9.37192543  | 9.37192543   | 9.37192543  | 9.37192543  | 9.37192543  | 9.37192543  | 9.37192543  | 9.37192543  | 9.37192543  | 9.37192543  | 9.37192543  | 9.37192543  | 9.37192543  | 9.37192543  | 9.37192543   | 9.37192543  |
| CVB51D2    | 10.07757112 | 10.16500509 | 9.68686191  | 10.19670439  | 9.98386435  | 9.70822014  | 9.618926018 | 9.754780824 | 9.238955455 | 9.750608602 | 9.57325275  | 10.20555414 | 9.695651874 | 10.18011583 | 10.02402803 | 9.678035563 | 10.003574809 | 9.610821388 |
| MRPL35     | 9.622405845 | 9.514270139 | 10.19070769 | 9.616559218  | 9.722892625 | 10.21299576 | 9.425178379 | 9.65702477  | 9.433998112 | 9.817423096 | 9.745375757 | 9.91057257  | 10.31545459 | 9.297848004 | 9.639485065 | 9.454028348 | 9.73139058   | 9.73139058  |
| ITPK1      | 9.639810652 | 9.795437046 | 9.824492827 | 9.824492827  | 9.795437046 | 9.824492827 | 9.824492827 | 9.824492827 | 9.824492827 | 9.824492827 | 9.824492827 | 9.824492827 | 9.824492827 | 9.824492827 | 9.824492827 | 9.824492827 | 9.824492827  | 9.824492827 |
| PSM8A      | 9.822240785 | 9.16250695  | 9.706820482 | 9.706820482  | 9.16250695  | 9.706820482 | 9.706820482 | 9.706820482 | 9.706820482 | 9.706820482 | 9.706820482 | 9.706820482 | 9.706820482 | 9.706820482 | 9.706820482 | 9.706820482 | 9.706820482  | 9.706820482 |
| RNF34      | 9.871962755 | 9.39099015  | 9.98954452  | 9.909751641  | 9.670420943 | 10.0170372  | 9.78240786  | 9.692281108 | 9.515921251 | 9.712356907 | 9.470689154 | 10.09301298 | 9.114394997 | 10.2136407  | 9.768952031 | 9.783224021 | 9.700143235  | 9.446195243 |
| LRR14      | 9.912373934 | 10.15667985 | 10.03747538 | 10.03747538  | 10.15667985 | 10.03747538 | 10.03747538 | 10.03747538 | 10.03747538 | 10.03747538 | 10.03747538 | 10.03747538 | 10.03747538 | 10.03747538 | 10.03747538 | 10.03747538 | 10.03747538  | 10.03747538 |
| COA5Y      | 9.6143807   | 9.759729839 | 10.08076632 | 9.948908063  | 9.86060273  | 9.812906652 | 9.723399054 | 9.56731388  | 9.619998248 | 9.88084837  | 9.626876771 | 9.664472751 | 9.965536796 | 9.696083052 | 9.188211206 | 9.233636226 | 9.61949074   | 9.61949074  |
| HMG20B     | 9.42408463  | 9.97580697  | 9.76717138  | 9.9830661    | 9.55658673  | 10.37466152 | 9.89429279  | 9.483457733 | 9.732280794 | 9.742327841 | 9.59853842  | 9.713270338 | 10.65600223 | 9.71760835  | 9.59351326  | 9.59351326  | 9.59351326   | 9.59351326  |
| S5B        | 9.36052327  | 9.768893953 | 10.15715317 | 10.2100189   | 10.0485490  | 9.040254339 | 9.761735881 | 9.590956675 | 9.54618572  | 9.487147358 | 9.509573102 | 10.21990601 | 9.96410539  | 9.87786998  | 9.69560069  | 9.652602869 | 9.57315581   | 9.69346865  |
| STP7       | 9.872352361 | 9.38112125  | 10.38112125 | 10.38112125  | 9.38112125  | 10.38112125 | 10.38112125 | 10.38112125 | 10.38112125 | 10.38112125 | 10.38112125 | 10.38112125 | 10.38112125 | 10.38112125 | 10.38112125 | 10.38112125 | 10.38112125  | 10.38112125 |
| RABA8      | 9.824861723 | 9.819007186 | 9.848800722 | 10.00461314  | 9.2225371   | 10.04361821 | 9.686128627 | 9.59216961  | 9.419716559 | 9.688585619 | 9.610925277 | 9.86105601  | 9.610925277 | 9.610925277 | 9.610925277 | 9.610925277 | 9.610925277  | 9.610925277 |
| ACLY       | 9.894951045 | 10.19205923 | 9.876148474 | 9.615411643  | 9.77262375  | 8.85257907  | 8.831325251 | 9.65327771  | 9.801160958 | 9.61290284  | 9.56584688  | 9.49993102  | 10.3647804  | 9.584980005 | 9.728869107 | 9.763147147 | 9.55391702   | 9.490341117 |
| CREG1      | 9.875443096 | 10.08932555 | 9.62529609  | 10.21140412  | 9.425473847 | 9.48970439  | 9.889275943 | 9.59623729  | 9.68850177  | 9.54276798  | 9.000214432 | 9.637859553 | 9.696723494 | 9.587471147 | 9.72511584  | 9.477173356 | 9.477173356  | 9.477173356 |
| SDH8       | 9.24025779  | 9.67799866  | 9.702510338 | 9.986766672  | 10.02787445 | 9.563840846 | 10.00349877 | 9.660939695 | 9.80483626  | 9.422547652 | 9.66501488  | 10.17864505 | 9.757371602 | 9.733373376 | 9.141491384 | 9.447907855 | 9.462620388  | 9.462620388 |
| MRPL34     | 9.85283177  | 9.843899659 | 9.678520805 | 9.235012629  | 10.08517299 | 10.3308905  | 9.71240185  | 9.251898568 | 9.558734527 | 9.717140185 | 9.650525779 | 9.516950099 | 9.817274007 | 9.965951898 | 9.434102363 | 9.539113988 | 9.70163481   | 9.70163481  |
| CTD-2021K4 | 9.970770337 | 9.341448278 | 9.686941883 | 9.598064351  | 9.205828616 | 9.742514633 | 9.582054296 | 9.62684017  | 9.618728655 | 9.749047429 | 9.781577196 | 9.699957762 | 9.763611481 | 9.29128823  | 9.794955751 | 9.713352524 | 9.56354683   | 9.56354683  |
| SARS2      | 9.655008167 | 9.062779447 | 9.968784714 | 9.968784714  | 9.062779447 | 9.968784714 | 9.968784714 | 9.968784714 | 9.968784714 | 9.9         |             |             |             |             |             |             |              |             |

|          |             |             |             |              |             |             |             |             |             |             |             |             |             |              |             |             |             |              |
|----------|-------------|-------------|-------------|--------------|-------------|-------------|-------------|-------------|-------------|-------------|-------------|-------------|-------------|--------------|-------------|-------------|-------------|--------------|
| SMARCB1  | 9.913371872 | 10.40754542 | 10.13763635 | 9.90288523   | 9.74340893  | 10.07761319 | 9.65213571  | 9.83896781  | 9.671431832 | 9.225611842 | 9.38880981  | 9.77049565  | 9.942071935 | 9.635446905  | 8.918663235 | 9.346539374 | 9.175143283 | 9.18158424   |
| CHMP7    | 9.667456732 | 9.30249056  | 9.926290756 | 9.167740819  | 10.30048768 | 9.84477489  | 9.94436167  | 9.561512774 | 9.514900408 | 9.860951493 | 9.519637917 | 9.741012606 | 10.089944   | 9.565106561  | 9.72526717  | 9.61377374  | 9.594512002 | 9.325918118  |
| ATPV1A   | 9.252058927 | 10.1542906  | 9.890690987 | 9.691590929  | 9.30865966  | 9.788572846 | 9.258549594 | 9.592774958 | 9.619020174 | 9.67938811  | 9.969994056 | 9.726930708 | 9.90589702  | 9.826062091  | 9.766066282 | 9.573004974 | 9.265869248 |              |
| PTDS51   | 9.736702075 | 9.360230785 | 9.408665853 | 10.16468417  | 9.740894699 | 9.868013725 | 9.64407606  | 9.456849179 | 10.10426792 | 9.208285851 | 10.06328713 | 9.672630048 | 10.08048042 | 10.11921436  | 8.674390082 | 9.606989694 | 9.065788831 | 9.028296201  |
| OCAD2    | 9.433523304 | 9.92532304  | 9.89334304  | 9.87828147   | 9.71082324  | 9.71082324  | 9.71082324  | 9.71082324  | 9.71082324  | 9.71082324  | 9.71082324  | 9.71082324  | 9.71082324  | 9.71082324   | 9.71082324  | 9.71082324  | 9.71082324  | 9.71082324   |
| TMEM167B | 9.226570098 | 9.302110492 | 9.907995185 | 1.970155375  | 1.970155375 | 1.970155375 | 1.970155375 | 1.970155375 | 1.970155375 | 1.970155375 | 1.970155375 | 1.970155375 | 1.970155375 | 1.970155375  | 1.970155375 | 1.970155375 | 1.970155375 | 1.970155375  |
| PARL     | 9.775915304 | 9.65006615  | 9.686472445 | 9.488250788  | 9.753609303 | 9.808724359 | 9.87908222  | 9.534310864 | 9.66431804  | 9.17046171  | 9.491805100 | 10.06389657 | 10.2755135  | 10.079707438 | 9.340273915 | 9.582303667 | 9.531149571 | 9.405547756  |
| FXYD5    | 10.53342071 | 10.44780064 | 9.682006272 | 10.16281805  | 9.52058658  | 9.509911674 | 10.33601843 | 9.509911674 | 9.509911674 | 9.509911674 | 9.509911674 | 9.509911674 | 9.509911674 | 9.509911674  | 9.509911674 | 9.509911674 | 9.509911674 | 9.509911674  |
| YIPF1    | 9.706392305 | 9.32066485  | 10.36377699 | 9.7498425    | 9.929201314 | 9.95980865  | 9.257020917 | 9.053281051 | 9.300695376 | 9.396621033 | 9.546334148 | 10.16626642 | 10.13304632 | 10.23829258  | 9.297448467 | 9.577113824 | 9.609595605 | 9.233424657  |
| CDK16    | 9.516923754 | 9.30766028  | 10.08851621 | 9.07238872   | 9.641729418 | 10.21360412 | 9.779740692 | 9.562886211 | 9.941481876 | 9.768345606 | 9.065888402 | 9.565436697 | 9.810219501 | 9.667373501  | 9.67373501  | 9.67373501  | 9.67373501  | 9.67373501   |
| HADHB    | 9.729742117 | 9.96547277  | 9.96547277  | 9.96547277   | 9.96547277  | 9.96547277  | 9.96547277  | 9.96547277  | 9.96547277  | 9.96547277  | 9.96547277  | 9.96547277  | 9.96547277  | 9.96547277   | 9.96547277  | 9.96547277  | 9.96547277  | 9.96547277   |
| ZFX      | 8.341658584 | 9.733482103 | 9.885821209 | 9.788279473  | 9.898222043 | 9.842099475 | 9.031861482 | 9.281962593 | 9.180806623 | 9.71474734  | 9.828947525 | 9.61142068  | 9.921736944 | 9.7579635    | 9.639043538 | 9.56603676  | 9.96588288  | 9.703291681  |
| ATP1B1   | 9.333373852 | 9.221408561 | 9.867448892 | 9.44795943   | 9.950956957 | 9.48665205  | 9.648765029 | 9.78853726  | 10.2751395  | 9.7210693   | 10.14967456 | 10.08878829 | 9.676002429 | 9.760179198  | 9.561209993 | 9.676017919 | 9.676017919 | 9.676017919  |
| PKNO3    | 9.35635913  | 9.9519273   | 9.119376669 | 9.885529596  | 9.06773444  | 9.89403853  | 9.214517102 | 10.42349403 | 9.875945403 | 10.51110622 | 9.940537828 | 9.896941437 | 9.508985371 | 9.147381596  | 9.86898797  | 10.3362598  | 10.06748136 | 10.1277561   |
| SART3    | 9.68256073  | 9.861740696 | 9.661157479 | 9.81263993   | 9.17853937  | 9.81694133  | 9.982749954 | 9.747633218 | 9.665113682 | 9.580236508 | 9.812771578 | 9.06431873  | 9.59554252  | 9.840474439  | 9.41713883  | 9.653252879 | 9.604784511 |              |
| LZTF1L   | 9.87861188  | 10.1207416  | 9.107389738 | 9.967345738  | 9.707473291 | 10.08029279 | 9.245430978 | 8.739011522 | 9.742048205 | 9.53369672  | 9.578628459 | 10.30502925 | 8.96239067  | 8.718995996  | 8.860339919 | 9.408923816 | 9.0293162   | 8.8211778    |
| ACSL3    | 10.1023449  | 9.05896777  | 9.02649358  | 9.27292772   | 10.14850453 | 9.077718445 | 9.077718445 | 9.077718445 | 9.077718445 | 9.077718445 | 9.077718445 | 9.077718445 | 9.077718445 | 9.077718445  | 9.077718445 | 9.077718445 | 9.077718445 | 9.077718445  |
| KHNYN    | 9.523064308 | 9.488531844 | 9.931276005 | 9.891480806  | 9.891480806 | 9.891480806 | 9.891480806 | 9.891480806 | 9.891480806 | 9.891480806 | 9.891480806 | 9.891480806 | 9.891480806 | 9.891480806  | 9.891480806 | 9.891480806 | 9.891480806 | 9.891480806  |
| CHD4     | 9.984151501 | 10.00898382 | 9.416437858 | 9.230689337  | 9.230689337 | 9.230689337 | 9.230689337 | 9.230689337 | 9.230689337 | 9.230689337 | 9.230689337 | 9.230689337 | 9.230689337 | 9.230689337  | 9.230689337 | 9.230689337 | 9.230689337 | 9.230689337  |
| ELAC2    | 9.414733055 | 10.55747725 | 9.949368018 | 10.189877701 | 9.929756378 | 9.736102779 | 10.31845182 | 9.549164399 | 9.287471325 | 9.645268464 | 9.426831623 | 9.54643686  | 9.530447528 | 10.10823971  | 9.698261166 | 9.028218268 | 9.367979906 | 9.686217145  |
| EMC2     | 9.494901368 | 10.07642089 | 9.113909564 | 9.213679917  | 10.01504842 | 10.1177508  | 9.837048756 | 9.12651564  | 9.324261041 | 9.60273938  | 10.11623929 | 9.565577119 | 10.10574218 | 9.260986399  | 9.698937946 | 9.687916076 | 9.29454355  |              |
| UBE2S    | 9.880063605 | 9.652674771 | 9.42024502  | 9.652674771  | 9.374997165 | 10.05715986 | 9.665716844 | 9.345875122 | 9.45297744  | 9.075900248 | 10.11961844 | 9.581812912 | 9.637506948 | 9.530175106  | 9.511235505 | 9.308198266 | 9.409392623 | 9.810280402  |
| TMEM127  | 10.213712   | 9.513716214 | 9.036859111 | 10.0253393   | 9.31468842  | 9.388773915 | 10.21373974 | 9.616251232 | 9.57399234  | 9.615283005 | 9.91556561  | 9.936921191 | 9.673304049 | 9.24400736   | 9.731992283 | 9.862655299 | 9.308198266 | 9.409392623  |
| LTPB3    | 9.928441213 | 10.11598345 | 9.805083119 | 9.43593012   | 9.905931979 | 10.13087718 | 10.24660757 | 9.188201479 | 9.587985769 | 9.700911212 | 9.28609954  | 9.27840814  | 9.960539992 | 10.02736048  | 8.986956979 | 9.221580211 | 9.39138806  | 8.571278816  |
| TMEM2    | 9.512882907 | 9.641651336 | 8.73907488  | 9.641651336  | 8.824637602 | 8.9276111   | 9.646807947 | 9.793041309 | 9.882331686 | 9.560552515 | 9.307530034 | 9.631251802 | 10.2238497  | 10.03129627  | 10.17200938 | 10.16851148 | 9.303129697 |              |
| GM3A     | 8.977119629 | 8.879989494 | 9.603995841 | 9.036396948  | 10.14257201 | 9.176975915 | 10.58328683 | 9.630153902 | 10.03271096 | 9.842052659 | 10.14077837 | 8.894023502 | 10.42335703 | 9.712215179  | 9.676845061 | 9.676845061 | 9.658100691 | 9.747549022  |
| CSNK1G3  | 10.0722653  | 9.102342616 | 9.6233007   | 9.816397502  | 10.31982966 | 9.748480173 | 10.16545448 | 9.225249192 | 9.46502415  | 9.32493915  | 9.861451232 | 9.555451459 | 9.581364341 | 9.785229796  | 9.286494079 | 9.668590313 | 9.358679209 | 9.736570029  |
| PCP2     | 9.83085209  | 9.96818208  | 9.96818208  | 9.96818208   | 9.96818208  | 9.96818208  | 9.96818208  | 9.96818208  | 9.96818208  | 9.96818208  | 9.96818208  | 9.96818208  | 9.96818208  | 9.96818208   | 9.96818208  | 9.96818208  | 9.96818208  | 9.96818208   |
| PAF1     | 9.547402091 | 9.10377067  | 9.97857443  | 9.746330209  | 9.648874491 | 9.675809111 | 9.980867599 | 9.98015074  | 9.842002472 | 9.98136975  | 9.755120368 | 9.578574756 | 9.758474029 | 9.860180584  | 9.838038487 | 9.59107     | 9.746485577 |              |
| SFB3     | 10.0260835  | 10.00602494 | 9.601570056 | 9.68503968   | 9.836768877 | 9.58775675  | 9.923175176 | 9.127867964 | 9.682128878 | 9.26833983  | 9.398629067 | 9.663037669 | 9.792493711 | 9.624629539  | 9.111551213 | 9.625426968 | 9.14748187  | 9.658703256  |
| DNAI21   | 9.37138837  | 10.00640522 | 9.421905997 | 9.455243522  | 10.0869441  | 9.834145511 | 9.24425661  | 9.834145511 | 9.24425661  | 9.834145511 | 9.24425661  | 9.834145511 | 9.24425661  | 9.834145511  | 9.24425661  | 9.834145511 | 9.24425661  | 9.834145511  |
| CPNE3    | 9.860919212 | 9.348568203 | 9.753713016 | 10.16972059  | 9.44068758  | 9.754873758 | 9.683110621 | 9.650623103 | 9.918784439 | 9.492592534 | 9.938913905 | 9.158994624 | 9.72437967  | 8.655770459  | 10.05380162 | 9.735759352 | 9.174665119 | 9.342399842  |
| TSN      | 10.0762455  | 10.2948347  | 10.12010035 | 9.79569615   | 10.00454866 | 10.50407663 | 9.072975443 | 9.69352266  | 9.377507467 | 9.470988016 | 10.60237638 | 9.810634662 | 9.642475514 | 8.740251654  | 9.433233053 | 9.559624234 | 9.439848722 |              |
| DCAF5    | 8.657112211 | 10.14497318 | 9.665257443 | 9.76800486   | 9.616666333 | 9.590130729 | 9.947762601 | 9.478281475 | 9.728417506 | 9.60576565  | 9.6707494   | 8.611729532 | 9.939251337 | 9.209567784  | 9.900993066 | 9.818833988 | 9.644555527 | 9.502110631  |
| PODNL2   | 9.62667121  | 10.24562206 | 9.964512083 | 9.964512083  | 9.964512083 | 9.964512083 | 9.964512083 | 9.964512083 | 9.964512083 | 9.964512083 | 9.964512083 | 9.964512083 | 9.964512083 | 9.964512083  | 9.964512083 | 9.964512083 | 9.964512083 | 9.964512083  |
| EMC2     | 9.923866023 | 9.854878003 | 9.854878003 | 9.854878003  | 9.854878003 | 9.854878003 | 9.854878003 | 9.854878003 | 9.854878003 | 9.854878003 | 9.854878003 | 9.854878003 | 9.854878003 | 9.854878003  | 9.854878003 | 9.854878003 | 9.854878003 | 9.854878003  |
| PMVK     | 9.459910592 | 10.24027447 | 9.924343696 | 9.749970025  | 8.850514384 | 10.22653704 | 9.478222285 | 9.519837845 | 9.723242413 | 9.450040343 | 9.489397451 | 9.802560642 | 9.760559601 | 9.47158079   | 9.57001251  | 9.369774836 | 9.138951883 | 9.769420218  |
| ATF2     | 9.69445392  | 9.790923207 | 9.443434251 | 9.485798191  | 9.43641464  | 9.121696442 | 9.892290202 | 9.562707766 | 9.926512354 | 9.640275525 | 9.918101003 | 10.0966366  | 9.821185621 | 8.545618526  | 9.604588467 | 9.963098172 | 9.722422889 | 9.7140173218 |
| TSTA3    | 9.549392141 | 10.17960802 | 9.63393602  | 9.272730379  | 10.31191314 | 9.61093069  | 9.772848464 | 9.612602513 | 9.645368236 | 9.347107862 | 9.454506219 | 9.989393686 | 9.67458788  | 10.03868258  | 9.685297461 | 9.223942218 | 9.609420507 | 9.783279499  |
| ALDH16A1 | 9.589156124 | 9.61975028  | 9.875898578 | 9.875898578  | 9.875898578 | 9.875898578 | 9.875898578 | 9.875898578 | 9.875898578 | 9.875898578 | 9.875898578 | 9.875898578 | 9.875898578 | 9.875898578  | 9.875898578 | 9.875898578 | 9.875898578 | 9.875898578  |
| ARHGAP25 | 9.577266291 | 9.92391473  | 9.978655289 | 9.816350703  | 9.59845743  | 9.803983686 | 9.272962012 | 9.55711846  | 9.669931371 | 9.65035025  | 9.9419117   | 9.10720579  | 9.628772347 | 8.878518691  | 9.98361275  | 9.570097789 | 9.458684138 | 10.01981231  |
| HDC3     | 9.651824795 | 9.86138482  | 9.94103841  | 9.963251586  | 9.55005907  | 9.79824266  | 9.23716792  | 9.60412489  | 9.72073906  | 9.599360354 | 9.435939377 | 9.87102716  | 9.803878561 | 10.21947477  | 9.73805068  | 9.96992844  | 9.459       |              |

|          |             |             |             |             |             |              |             |             |             |             |             |              |             |             |             |              |             |             |
|----------|-------------|-------------|-------------|-------------|-------------|--------------|-------------|-------------|-------------|-------------|-------------|--------------|-------------|-------------|-------------|--------------|-------------|-------------|
| SIXO     | 9.40409934  | 9.122269541 | 8.815113799 | 8.715310239 | 9.10305037  | 9.783086504  | 9.931298507 | 10.3068134  | 9.586028797 | 9.382396428 | 9.447011352 | 9.71603385   | 10.3074488  | 9.773675745 | 10.42232579 | 9.866702151  | 9.620120885 | 9.262175932 |
| KIAA0040 | 9.410325081 | 10.54151275 | 9.293010583 | 9.79239737  | 9.55163741  | 9.954487166  | 9.448030479 | 9.57903664  | 9.786571179 | 9.266848962 | 9.842571473 | 9.55621765   | 9.188697083 | 9.930608697 | 9.82244748  | 9.979408979  | 9.627003387 | 9.627003387 |
| MED4     | 9.78784816  | 9.25226446  | 9.647813051 | 9.05206224  | 9.705263793 | 9.545359596  | 9.853077229 | 9.548787191 | 9.555204723 | 9.465318178 | 9.929314917 | 9.852104835  | 9.475752526 | 9.364904964 | 9.714243788 | 9.438854511  | 9.686365964 | 9.686365964 |
| ATPS2    | 9.71486373  | 10.07004653 | 9.815998484 | 9.450759593 | 10.0655477  | 9.877632183  | 9.346153645 | 9.592947147 | 9.260049145 | 9.425933178 | 9.638194474 | 9.554379861  | 9.320005992 | 9.070749962 | 9.239670171 | 9.620496231  | 9.887421693 | 9.887421693 |
| TRM4     | 9.3351491   | 9.89436292  | 9.42835838  | 9.92671307  | 10.0959545  | 9.89043667   | 9.20353265  | 9.7938335   | 9.46029308  | 9.6855122   | 9.54012588  | 9.43651012   | 9.43651012  | 9.43651012  | 9.412878307 | 9.12878307   | 9.53274572  | 9.53274572  |
| LRK1     | 9.87771191  | 9.37124359  | 9.77024394  | 9.87761081  | 9.02892486  | 9.635162656  | 9.115578206 | 9.32219877  | 9.106572347 | 9.742939477 | 9.074994544 | 9.645688211  | 9.822899685 | 10.36042719 | 10.1670007  | 10.556561876 | 10.11266954 | 10.11266954 |
| GOE1     | 9.693003402 | 9.86080273  | 9.968368605 | 9.907479175 | 9.705984964 | 10.2304203   | 9.592205507 | 9.27248782  | 9.524371706 | 9.19036871  | 9.76395051  | 9.81630917   | 9.962303493 | 9.558804019 | 9.435243772 | 9.536559595  | 9.26165246  | 9.675272275 |
| FAMS6B   | 9.838178625 | 10.33002445 | 9.734493441 | 9.508835902 | 9.424327849 | 9.94475356   | 9.869659536 | 9.301092248 | 9.590927947 | 9.116910423 | 9.605878274 | 9.646034916  | 10.08383101 | 9.90846809  | 9.318721867 | 9.384902698  | 9.442323939 | 9.442323939 |
| CEB2     | 10.13703591 | 9.635673816 | 9.973891697 | 9.649944251 | 9.407653811 | 9.359240219  | 9.665327377 | 9.087511451 | 9.948117527 | 9.33717151  | 9.587832089 | 9.608547282  | 10.04902029 | 9.427815997 | 9.127417998 | 9.079386413  | 9.445554119 | 9.153116846 |
| UBA2     | 9.49564210  | 9.78629762  | 9.280876999 | 10.09884755 | 9.159190794 | 9.615435099  | 9.37072974  | 9.378868145 | 9.394239504 | 9.655284365 | 9.98934834  | 9.637039846  | 9.114905053 | 9.93514659  | 9.762391531 | 9.905751174  | 9.576409111 | 9.576409111 |
| RSU1     | 9.838316156 | 10.12910688 | 9.264528921 | 10.12910688 | 10.19968207 | 9.267873506  | 9.606480197 | 9.827744737 | 9.916009188 | 9.228449843 | 9.31783259  | 10.34809173  | 9.854603487 | 9.706392186 | 9.244969382 | 9.296616834  | 9.584713606 | 9.584713606 |
| APOL3    | 9.46467155  | 9.53393238  | 9.76644359  | 9.194246044 | 9.828621892 | 10.13890043  | 9.587462256 | 9.6028671   | 9.906044545 | 9.739197067 | 9.877839255 | 9.161126704  | 9.084655251 | 9.791530262 | 9.397721505 | 9.74338949   | 9.681960319 | 9.434367753 |
| AP1M1    | 9.80176397  | 9.33767292  | 10.01656682 | 9.49024427  | 9.793709483 | 10.14576481  | 9.440253424 | 9.233646834 | 9.233646834 | 9.31217498  | 10.07109273 | 10.51301942  | 9.47783785  | 9.422408837 | 9.61848528  | 9.571898835  | 9.51653335  | 9.51653335  |
| IF16     | 9.51796152  | 9.68575101  | 10.2630008  | 9.718806667 | 9.609296277 | 9.5803737    | 9.365708102 | 9.473081011 | 9.3235359   | 9.33545491  | 10.20728116 | 9.765442958  | 9.536930116 | 9.79210115  | 9.616236621 | 9.220419327  | 9.516530324 | 9.516530324 |
| IFM      | 9.038682055 | 9.44856729  | 9.850941246 | 9.792551465 | 9.435678011 | 9.51929749   | 9.594033363 | 9.842420518 | 9.792695889 | 9.702610099 | 9.83223791  | 9.759429956  | 9.504681295 | 9.464084394 | 9.771060044 | 9.826274041  | 9.950478977 | 9.950478977 |
| INFCB    | 9.304700622 | 9.79731134  | 9.664468677 | 10.0374118  | 10.00657196 | 9.6078787474 | 9.825684345 | 9.617814511 | 9.41043562  | 9.52859734  | 10.21664445 | 9.342745195  | 9.189097651 | 9.577938235 | 9.523466442 | 9.888385373  | 9.28500461  | 9.28500461  |
| TAHYA    | 9.609226407 | 10.19132728 | 9.45493802  | 10.0551292  | 10.19132728 | 9.45493802   | 10.03427696 | 9.575314918 | 9.986109485 | 9.132378046 | 9.65870704  | 9.951225991  | 9.280892588 | 9.269318325 | 9.129120892 | 9.35249442   | 9.201493412 | 9.46167891  |
| SPRL2A   | 8.86211529  | 8.794704499 | 9.861328519 | 9.585106649 | 9.434031763 | 9.861328519  | 9.268440282 | 9.597947433 | 9.597947433 | 9.912092761 | 9.720581604 | 10.43671767  | 9.49352712  | 9.881013352 | 9.368191281 | 9.894391281  | 9.86667800  | 9.86667800  |
| ZDHX3    | 10.00501297 | 10.2362627  | 8.657071162 | 9.813203891 | 9.733737189 | 9.694024861  | 10.14155537 | 9.191666971 | 9.532802617 | 9.138824141 | 9.40475838  | 9.101159929  | 10.14381821 | 9.622272143 | 9.434054298 | 9.408415475  | 9.960184136 | 9.960184136 |
| MEAL     | 10.13703699 | 10.00206683 | 10.14177883 | 9.984515186 | 9.787709539 | 9.82505158   | 9.792799773 | 9.281646356 | 9.474728661 | 9.675059111 | 9.507369094 | 10.03410082  | 9.568676359 | 9.371241428 | 9.460225379 | 9.502807219  | 9.846791712 | 9.846791712 |
| TUL1     | 10.42922851 | 10.38610625 | 9.892808059 | 9.422720906 | 10.17401701 | 9.415247259  | 9.031062578 | 9.28570393  | 9.31155048  | 9.459003861 | 10.6582876  | 9.806697083  | 9.879594322 | 9.399425353 | 9.146440009 | 9.92356462   | 9.26742104  | 9.26742104  |
| HMGN4    | 9.298528475 | 9.55478152  | 9.688231202 | 10.030793   | 10.1206445  | 9.8520083102 | 9.257054074 | 10.2439186  | 9.462983588 | 9.400739208 | 10.2777875  | 10.155885874 | 8.857160357 | 9.265868126 | 9.62521132  | 9.471165201  | 9.978948705 | 9.978948705 |
| NEZ11    | 9.709149306 | 9.713609336 | 10.33095768 | 9.54182925  | 9.7739849   | 9.478583394  | 9.113302966 | 9.690865113 | 10.02203105 | 9.548795289 | 10.17841485 | 9.62773932   | 9.181315604 | 8.75402903  | 9.499899511 | 9.902370468  | 9.327047283 | 9.327047283 |
| CR1      | 9.698753918 | 9.888595679 | 10.1149342  | 9.05947468  | 9.553252745 | 9.623084677  | 9.882532463 | 9.335292494 | 9.263987165 | 9.638792894 | 10.04904742 | 9.837030838  | 9.886835854 | 9.382942594 | 9.220661316 | 9.910714788  | 9.910714788 | 9.910714788 |
| TNRSF4   | 9.481347921 | 9.667472525 | 9.127672525 | 9.881347921 | 9.466776248 | 9.828873833  | 9.930787089 | 9.526838286 | 9.942648346 | 9.654779682 | 9.802548685 | 9.032504114  | 9.060845965 | 10.10126543 | 9.882297961 | 9.344282912  | 9.292669898 | 9.844546062 |
| MGLL     | 9.639653951 | 9.852829544 | 9.148400108 | 9.81315458  | 9.52669024  | 9.870902449  | 9.970185902 | 9.741003329 | 9.291001976 | 9.438886274 | 9.573357052 | 10.10029675  | 10.20538536 | 9.10156568  | 9.56242561  | 9.629343482  | 9.720948959 | 9.720948959 |
| SEPH51   | 9.64434545  | 9.602337002 | 9.406265739 | 9.64413903  | 10.11970543 | 9.75871055   | 9.653171474 | 9.423028206 | 9.758424762 | 9.446519942 | 9.65262842  | 9.64365329   | 9.26455339  | 9.69919328  | 9.22979115  | 9.675367219  | 9.93941471  | 9.93941471  |
| PARC     | 9.749025765 | 9.42083765  | 9.774831765 | 9.42083765  | 9.42083765  | 9.42083765   | 9.42083765  | 9.42083765  | 9.42083765  | 9.42083765  | 9.42083765  | 9.42083765   | 9.42083765  | 9.42083765  | 9.42083765  | 9.42083765   | 9.42083765  | 9.42083765  |
| PCN      | 9.616162921 | 9.774831765 | 9.64083765  | 9.550821934 | 9.836969348 | 9.653262101  | 9.443166703 | 9.614991136 | 9.45895735  | 9.465891149 | 9.87889459  | 9.707345735  | 9.375296339 | 9.397030256 | 9.77967668  | 9.934346769  | 9.921703422 | 9.921703422 |
| RCN2     | 9.282109991 | 9.601824892 | 9.918889747 | 9.736369578 | 9.826772892 | 9.97019887   | 9.310732374 | 9.458159832 | 9.601235731 | 9.25102372  | 9.635289928 | 9.635317579  | 10.26425313 | 8.612929808 | 9.269071462 | 9.342391324  | 9.5621549   | 9.563699472 |
| ARID1A   | 9.640180978 | 9.491071467 | 9.814200143 | 9.814200143 | 9.52254617  | 9.420620507  | 9.453908893 | 9.820081422 | 9.6449971   | 9.623404677 | 9.692024622 | 9.109447027  | 9.497627259 | 9.792569741 | 9.541728181 | 9.619096953  | 9.619096953 | 9.619096953 |
| AKIRIN1  | 9.460902832 | 9.137648338 | 9.510750429 | 9.816621688 | 9.551237678 | 10.14083957  | 9.917825277 | 9.612128663 | 9.841981246 | 9.505819282 | 9.95221294  | 9.453525667  | 9.365321753 | 10.44471731 | 9.961603391 | 10.16598521  | 9.066854876 | 10.0352294  |
| SRRT     | 9.59833075  | 9.58831484  | 9.110934255 | 9.30823445  | 9.973569417 | 9.027420899  | 9.643937595 | 9.328322146 | 9.643937595 | 9.328322146 | 9.328322146 | 9.328322146  | 9.328322146 | 9.328322146 | 9.328322146 | 9.328322146  | 9.328322146 | 9.328322146 |
| SFB3     | 9.826303991 | 10.49256176 | 9.193037539 | 10.09317816 | 9.842358699 | 9.488326394  | 8.83378625  | 9.469346698 | 9.461082747 | 10.16152288 | 9.835802661 | 9.390143001  | 6.609597426 | 10.11549214 | 9.447449398 | 9.460042001  | 9.147555478 | 9.69306244  |
| CAOT1    | 9.73281009  | 9.35204376  | 10.18929802 | 9.35204376  | 9.35204376  | 9.35204376   | 9.35204376  | 9.35204376  | 9.35204376  | 9.35204376  | 9.35204376  | 9.35204376   | 9.35204376  | 9.35204376  | 9.35204376  | 9.35204376   | 9.35204376  | 9.35204376  |
| RASD1    | 10.82735119 | 11.1126154  | 9.636109525 | 9.88811809  | 9.88811809  | 9.88811809   | 9.88811809  | 9.88811809  | 9.88811809  | 9.88811809  | 9.88811809  | 9.88811809   | 9.88811809  | 9.88811809  | 9.88811809  | 9.88811809   | 9.88811809  | 9.88811809  |
| JSRP1    | 9.32883478  | 10.0226098  | 10.52486763 | 9.18068463  | 9.295429216 | 10.15095944  | 9.877632561 | 9.623738926 | 10.09511021 | 9.3552082   | 9.614526102 | 8.301256266  | 10.04189011 | 9.718288617 | 9.03194036  | 9.545417611  | 9.834480171 | 9.85176342  |
| DNRP     | 9.886901838 | 9.72078891  | 9.608854151 | 10.2659038  | 9.99018918  | 9.670828523  | 9.173738241 | 9.523913376 | 9.174737166 | 9.550169396 | 9.297060274 | 9.84878068   | 10.46612791 | 9.393551037 | 9.480399887 | 9.84790324   | 9.50260679  | 9.50260679  |
| UBE12    | 9.674027145 | 9.645619277 | 10.15016739 | 9.28824332  | 9.608331473 | 9.709545938  | 9.95700422  | 9.648775543 | 9.476180728 | 9.073786428 | 9.65262932  | 9.019259337  | 9.550481717 | 9.96485293  | 9.153222911 | 9.459794266  | 9.840032122 | 9.183488117 |
| FAMS3C   | 9.340846847 | 9.100229139 | 9.16454446  | 9.59389938  | 9.308276461 | 9.8665536    | 9.12813534  | 10.21218784 | 9.1218784   | 10.11907481 | 9.394330079 | 9.605368736  | 9.552735597 | 10.42716155 | 9.956513165 | 9.102366123  | 9.736221619 | 9.736221619 |
| MTMR6    | 1.848886626 | 9.11696998  | 9.48207565  | 9.67246509  | 9.116441028 | 9.88829944   | 8.915092898 | 9.735119232 | 9.546123238 | 9.442336206 | 9.34776881  | 9.029131034  | 9.873251288 | 9.302262206 | 10.02492028 | 9.927828259  | 9.92932569  | 9.92932569  |
| EOXC4    | 9.373437842 | 9.06139078  | 9.000670728 | 8.850795342 | 9.766471208 | 9.850795342  | 9.366317331 | 10.00520862 | 9.69572587  | 9.8306274   | 9.340726891 | 9.745887846  | 9.362471875 | 10.21958877 | 9.947       |              |             |             |

|             |             |             |             |             |             |             |             |             |             |             |             |             |             |             |             |             |             |             |
|-------------|-------------|-------------|-------------|-------------|-------------|-------------|-------------|-------------|-------------|-------------|-------------|-------------|-------------|-------------|-------------|-------------|-------------|-------------|
| GNLI        | 9.12882484  | 9.33549673  | 9.41962925  | 9.78668837  | 9.78581274  | 9.56746252  | 9.45013921  | 9.94809229  | 9.95962673  | 9.54028613  | 9.70828022  | 8.81226929  | 9.03570801  | 9.88606341  | 9.38091141  | 9.603895218 | 9.926563893 | 9.340281727 |
| GLBI        | 9.06213647  | 9.85948264  | 9.56337889  | 9.26889851  | 9.27914439  | 9.83909575  | 9.27914439  | 9.26889851  | 9.54668238  | 9.45421732  | 9.73566384  | 10.02212718 | 9.26467407  | 9.02005347  | 9.38241291  | 9.422447163 | 9.173510524 | 9.688084144 |
| CRLS1       | 9.89655651  | 9.87470682  | 9.30493686  | 9.39730053  | 9.45960397  | 9.86673048  | 9.00429659  | 9.80185652  | 9.51655612  | 9.43674912  | 9.62846308  | 9.98326481  | 9.60792288  | 9.73771734  | 9.425430745 | 9.497032594 | 9.591237337 | 9.991818669 |
| SNRPB       | 9.4493116   | 9.56733504  | 9.89952174  | 9.34224729  | 9.50839751  | 9.62765539  | 9.42372650  | 9.58971783  | 9.53681610  | 9.32148514  | 9.69874319  | 9.86417293  | 9.80562916  | 9.5745698   | 9.33070588  | 9.334677208 | 9.334512285 | 9.639833474 |
| SCIA        | 9.57672468  | 9.78734608  | 9.80747119  | 9.74719159  | 9.58043337  | 9.74719159  | 9.87791757  | 9.44489822  | 9.44489822  | 9.34482007  | 9.31741593  | 9.28452122  | 9.82078465  | 10.0562162  | 9.52741101  | 9.32078465  | 9.324560832 | 9.269797116 |
| PTPN11      | 8.62322337  | 8.65746265  | 8.75407285  | 8.86041668  | 9.10712265  | 8.78733288  | 8.10003705  | 9.28939365  | 9.5854327   | 9.40040724  | 9.76202274  | 9.80788455  | 9.76094422  | 9.73655898  | 9.62037668  | 9.399919529 | 9.83915124  | 9.818641214 |
| GRPL15      | 8.881273516 | 9.55726136  | 9.786637964 | 9.68729506  | 9.21899907  | 9.80944838  | 8.782241579 | 9.20671684  | 9.55623532  | 10.10682635 | 9.216014156 | 9.402208504 | 10.05276824 | 9.905314569 | 9.145393126 | 9.544094951 | 9.699822268 | 9.422575673 |
| MAPKAP1     | 9.68913426  | 9.825051585 | 9.752601487 | 9.270891412 | 9.814382801 | 9.391445161 | 9.482716508 | 9.474969092 | 9.738153922 | 9.546240249 | 9.316333484 | 9.82293209  | 10.00273262 | 9.619256932 | 9.536140854 | 9.554486859 | 9.46011405  | 9.627145006 |
| NUBP2       | 9.58918104  | 10.18411501 | 9.774021201 | 9.363548983 | 9.56341118  | 10.32739018 | 9.870458751 | 9.284666579 | 9.505996998 | 9.247572683 | 9.530126289 | 9.937253152 | 9.643665418 | 9.903482438 | 9.899727959 | 9.501439354 | 9.476229430 | 9.028517927 |
| VPSS4       | 10.28682601 | 8.845118911 | 9.467339016 | 8.845958261 | 9.20751376  | 9.467339016 | 9.467339016 | 9.485631171 | 9.614003136 | 9.237910711 | 9.820263521 | 9.554618842 | 10.45684951 | 10.64365431 | 9.510904185 | 9.6900196   | 9.680788842 | 9.537233178 |
| ADA         | 9.652385458 | 9.849736467 | 9.849736467 | 9.849736467 | 9.551035053 | 9.60943459  | 9.46623007  | 9.770991778 | 9.441984453 | 9.5792058   | 9.69798632  | 9.647768281 | 9.975143208 | 9.540293756 | 9.517134145 | 9.517970525 | 9.591621123 | 11.50457333 |
| CNS1A       | 9.487681494 | 9.91462298  | 9.72735706  | 9.70983495  | 9.72990319  | 9.64441285  | 9.504071596 | 9.071076701 | 9.725468144 | 9.416662321 | 9.43034538  | 9.67588564  | 9.66477823  | 8.631451044 | 9.17249899  | 9.54285019  | 9.127149568 | 9.72231839  |
| PRD12       | 9.848479086 | 9.189113888 | 9.538311948 | 9.578996106 | 9.378996106 | 9.378996106 | 9.306103477 | 9.719509686 | 9.557956692 | 9.721394414 | 8.51764784  | 9.185272943 | 9.82262821  | 9.868373483 | 10.11345714 | 9.70105893  | 9.514422405 |             |
| RASB        | 9.35987943  | 9.553892111 | 9.654774082 | 9.69698503  | 9.75623721  | 9.45674937  | 9.371013685 | 9.395166916 | 9.54516384  | 9.32801512  | 9.727932969 | 9.545412081 | 9.792784399 | 9.162311772 | 9.49011248  | 9.502798511 | 9.2434316   | 9.931964902 |
| 10.13269441 | 10.13269441 | 10.13269441 | 10.13269441 | 10.13269441 | 10.13269441 | 10.13269441 | 10.13269441 | 10.13269441 | 10.13269441 | 10.13269441 | 10.13269441 | 10.13269441 | 10.13269441 | 10.13269441 | 10.13269441 | 10.13269441 | 10.13269441 | 10.13269441 |
| GALK2       | 9.51498372  | 9.28591652  | 9.683590372 | 8.36778212  | 9.96256198  | 9.682311228 | 10.16387627 | 9.3528891   | 9.28198331  | 9.362462896 | 9.266795034 | 9.41637106  | 9.668819813 | 9.984607279 | 9.2338655   | 9.573014162 | 9.741395935 | 9.579484531 |
| RTF1        | 9.442044231 | 9.258640252 | 8.979661292 | 9.003851519 | 9.258640252 | 9.707097993 | 9.782651167 | 9.236813148 | 9.704292346 | 9.530363122 | 9.598675452 | 9.66790518  | 9.379554836 | 9.759244823 | 9.536160204 | 9.500280489 | 9.599374394 | 9.753088876 |
| CNH1        | 9.542696527 | 9.427401895 | 10.03012595 | 9.569224433 | 9.45062601  | 9.35697701  | 9.840018988 | 9.584441117 | 9.888676811 | 9.232178641 | 9.828795043 | 9.74221781  | 9.618121489 | 9.406022827 | 9.354213082 | 9.543099768 | 9.111782088 | 9.607920638 |
| ARHGAP30    | 9.547904537 | 9.296904989 | 9.503246891 | 9.731306796 | 9.53643014  | 9.287418494 | 9.097252168 | 9.560139859 | 9.64982691  | 9.560737316 | 9.582758739 | 9.694326119 | 9.448333002 | 9.784352827 | 9.653393996 | 9.668792905 | 9.364115993 | 9.274626278 |
| ARPC1A      | 10.17157061 | 10.0694436  | 9.21620096  | 9.623969437 | 9.21620096  | 9.6518395   | 9.78752448  | 9.10857355  | 9.55167172  | 9.117731616 | 9.553154229 | 10.30641113 | 9.532051928 | 9.483097836 | 9.020616754 | 9.3159866   | 8.87740479  | 9.470855891 |
| BTG5        | 9.14754631  | 9.03463131  | 9.18037704  | 9.18037704  | 9.18037704  | 9.18037704  | 9.18037704  | 9.18037704  | 9.18037704  | 9.18037704  | 9.18037704  | 9.18037704  | 9.18037704  | 9.18037704  | 9.18037704  | 9.18037704  | 9.18037704  | 9.18037704  |
| RBP1        | 10.10951201 | 9.67982699  | 9.141348565 | 9.57188604  | 9.54583421  | 9.98958169  | 10.02678576 | 9.465221331 | 9.536902584 | 9.523072068 | 10.36619217 | 15.76041122 | 9.818390324 | 9.528354855 | 9.774091309 | 9.479430702 | 9.35273559  |             |
| UBE2QL1     | 9.33119009  | 9.394178808 | 9.59889796  | 9.25169417  | 10.0340367  | 9.721934823 | 9.702533462 | 1.416658172 | 9.865062838 | 9.980761803 | 10.02685282 | 9.20708842  | 9.898242955 | 9.873355671 | 9.48244616  | 9.665387424 | 9.042060348 | 9.241015897 |
| 9.07520239  | 9.07520239  | 9.07520239  | 9.07520239  | 9.07520239  | 9.07520239  | 9.07520239  | 9.07520239  | 9.07520239  | 9.07520239  | 9.07520239  | 9.07520239  | 9.07520239  | 9.07520239  | 9.07520239  | 9.07520239  | 9.07520239  | 9.07520239  | 9.07520239  |
| CDC167      | 10.43973771 | 10.31309934 | 10.04973771 | 9.771842995 | 9.70145046  | 10.63745445 | 9.875581824 | 9.869054026 | 9.621266601 | 9.140881931 | 9.495277547 | 9.90235536  | 9.464713676 | 9.134831779 | 9.820661927 | 9.250017404 | 9.04635679  | 9.58331302  |
| MLX         | 9.06728477  | 10.47174825 | 9.14039495  | 9.148399315 | 9.552171021 | 10.11297897 | 9.928732112 | 9.625255114 | 9.176387089 | 9.167303174 | 9.34323459  | 9.64491938  | 9.483225409 | 9.22192924  | 9.208516863 | 9.147956639 | 9.285162075 |             |
| ABCA5       | 9.295271876 | 9.314681371 | 9.56888419  | 9.214790307 | 9.654637695 | 9.462192243 | 9.321355092 | 10.02105297 | 9.31590421  | 10.10537814 | 9.273561542 | 9.68895934  | 10.06222872 | 9.509577049 | 10.12195654 | 10.11130898 | 10.43237253 | 9.327315605 |
| ARPC1B      | 9.147174892 | 9.589131482 | 9.589131482 | 9.589131482 | 9.589131482 | 9.589131482 | 9.589131482 | 9.589131482 | 9.589131482 | 9.589131482 | 9.589131482 | 9.589131482 | 9.589131482 | 9.589131482 | 9.589131482 | 9.589131482 | 9.589131482 | 9.589131482 |
| TNRC6B      | 9.794859174 | 9.579459741 | 9.11307718  | 9.11307718  | 9.11307718  | 9.11307718  | 9.11307718  | 9.11307718  | 9.11307718  | 9.11307718  | 9.11307718  | 9.11307718  | 9.11307718  | 9.11307718  | 9.11307718  | 9.11307718  | 9.11307718  | 9.11307718  |
| SDCCAG8     | 9.850205806 | 10.33538296 | 9.13133929  | 9.856157798 | 10.12655405 | 9.44809994  | 9.431374127 | 9.212367995 | 9.636813231 | 9.447810868 | 9.484552325 | 9.591729701 | 9.800014797 | 9.110561917 | 9.029838603 | 9.64327979  | 9.172290213 | 9.84137973  |
| LSM12       | 9.491390296 | 9.603244858 | 9.603244858 | 9.603244858 | 9.603244858 | 9.603244858 | 9.603244858 | 9.603244858 | 9.603244858 | 9.603244858 | 9.603244858 | 9.603244858 | 9.603244858 | 9.603244858 | 9.603244858 | 9.603244858 | 9.603244858 | 9.603244858 |
| ZC3H4       | 9.659268146 | 10.14222107 | 9.759529842 | 9.270538219 | 9.844352259 | 9.190057788 | 9.811742061 | 9.378696526 | 9.18528228  | 9.612491383 | 9.499858519 | 9.989265374 | 9.09094038  | 10.02819418 | 9.56949502  | 9.507500392 | 9.4014878   | 9.800905428 |
| ZNF11       | 9.257498229 | 9.599232109 | 9.740710065 | 9.908409511 | 9.707110768 | 9.965179438 | 9.548975864 | 9.524904934 | 9.296378129 | 9.40357122  | 9.39866511  | 10.05062273 | 10.13332505 | 9.719073565 | 9.024387158 | 9.248293926 | 9.542831447 | 9.624696934 |
| ARMC10      | 9.599378052 | 10.00629817 | 9.692884519 | 9.458680219 | 10.19071548 | 9.010101896 | 10.14428338 | 9.11718507  | 9.494174047 | 9.226151492 | 8.867164278 | 10.42803136 | 9.907645562 | 9.644041389 | 8.806205919 | 9.579256787 | 9.207743649 | 9.400941653 |
| NFPI1       | 9.659675268 | 9.392541626 | 9.838954856 | 9.392541626 | 9.392541626 | 9.392541626 | 9.392541626 | 9.392541626 | 9.392541626 | 9.392541626 | 9.392541626 | 9.392541626 | 9.392541626 | 9.392541626 | 9.392541626 | 9.392541626 | 9.392541626 | 9.392541626 |
| BLT1        | 9.862102723 | 9.687521131 | 9.687521131 | 9.687521131 | 9.687521131 | 9.687521131 | 9.687521131 | 9.687521131 | 9.687521131 | 9.687521131 | 9.687521131 | 9.687521131 | 9.687521131 | 9.687521131 | 9.687521131 | 9.687521131 | 9.687521131 | 9.687521131 |
| NELFD       | 8.469449282 | 9.094491698 | 9.890376078 | 9.854275764 | 10.05275561 | 9.532526675 | 9.754400597 | 9.774963189 | 9.565289876 | 9.475605461 | 9.423896040 | 9.53867055  | 9.248231114 | 9.154609385 | 9.82744983  | 9.392273504 | 9.62096312  | 9.629467717 |
| SP2         | 9.442770235 | 9.061172911 | 9.828952696 | 9.92765636  | 9.72288422  | 9.616207415 | 9.92241549  | 9.166207415 | 9.166207415 | 9.166207415 | 9.499407759 | 10.2779495  | 9.560690215 | 9.36896991  | 9.142032794 | 9.569224421 | 9.214596146 | 9.25127912  |
| USP14       | 9.853127259 | 9.53333654  | 9.853295236 | 8.23899116  | 9.98548766  | 10.14764243 | 9.347939726 | 9.831901612 | 9.711326911 | 9.627278659 | 9.508916737 | 9.551764487 | 9.038451922 | 9.038881665 | 9.93532276  | 9.534188816 | 9.348632881 | 9.714759001 |
| HMOX2       | 10.03732705 | 10.20170957 | 9.90909889  | 9.345890251 | 9.46899825  | 9.693674506 | 9.79811651  | 9.591877639 | 9.614608736 | 9.475447117 | 9.713900431 | 9.263581021 | 9.464906333 | 9.438119895 | 9.458349317 |             |             |             |
| GF2FA2      | 9.833792789 | 9.518525267 | 9.52803322  | 9.487171638 | 9.869694749 | 9.934275602 | 9.78681728  | 9.12462651  | 9.537650988 | 9.502902643 | 9.950280598 | 9.98901121  | 9.874662142 | 9.170598886 | 9.215813327 | 9.467441948 | 9.325168157 |             |
| GNPT1       | 9.728892409 | 9.834050535 | 9.837429417 | 9.531120777 | 9.53176255  | 9.53176255  | 9.53176255  | 9.53176255  | 9.53176255  | 9.53176255  | 9.405711911 | 9.63783078  | 9.30531369  | 9.574617444 | 9.251608874 | 9.577485527 | 9.473407072 | 9.450640337 |
| CD2         | 9.898362389 | 9.396437482 | 9           |             |             |             |             |             |             |             |             |             |             |             |             |             |             |             |

|          |             |             |             |             |              |             |             |             |             |             |              |              |             |             |             |             |             |              |
|----------|-------------|-------------|-------------|-------------|--------------|-------------|-------------|-------------|-------------|-------------|--------------|--------------|-------------|-------------|-------------|-------------|-------------|--------------|
| EVIS     | 8.945492308 | 9.65112574  | 9.581505175 | 9.543270571 | 8.96543166   | 8.913575402 | 9.259876412 | 9.515250698 | 9.574465726 | 9.718180669 | 9.11897078   | 8.390381773  | 7.545114334 | 9.497121385 | 9.6036063   | 9.679943495 | 9.71613776  | 9.380563083  |
| DVYLB1   | 9.056454732 | 9.532184311 | 9.653248551 | 9.634872027 | 9.443405193  | 9.479711377 | 9.91371278  | 9.293925721 | 9.640108965 | 9.407913384 | 9.655779579  | 9.623115401  | 9.662512158 | 9.444879479 | 9.076626223 | 9.335276742 | 9.057133212 | 9.135854643  |
| CDI80    | 9.344387372 | 9.957210032 | 9.252087386 | 9.634534266 | 9.104873667  | 9.150669739 | 9.25385832  | 9.30519545  | 9.9325127   | 9.874323127 | 9.646328199  | 9.033155191  | 9.675855874 | 9.00215157  | 9.275276002 | 9.72583871  | 8.964555686 | 9.283290274  |
| LGALS5BP | 9.517057746 | 10.02471843 | 9.490396854 | 8.047960279 | 9.520552029  | 9.394751234 | 9.494481051 | 9.200354721 | 9.988526569 | 9.873332333 | 9.592980813  | 10.47611147  | 9.06029537  | 10.256015   | 9.835273725 | 9.983236639 | 8.50143621  | 11.502998812 |
| KQW11    | 9.761650251 | 9.455837373 | 9.405329511 | 9.455837373 | 9.580732895  | 9.452175296 | 9.318234573 | 9.759112738 | 9.499417399 | 9.759112738 | 9.46162826   | 9.915085257  | 9.040781875 | 9.749529519 | 9.509466198 | 9.362123824 | 9.711620922 | 9.588891973  |
| UQLN2    | 8.531664906 | 9.452463538 | 9.513002081 | 9.662182398 | 9.375560108  | 9.375560108 | 9.375560108 | 9.375560108 | 9.375560108 | 9.375560108 | 9.375560108  | 9.375560108  | 9.375560108 | 9.375560108 | 9.375560108 | 9.375560108 | 9.375560108 | 9.375560108  |
| DVYLC1H  | 9.483196726 | 10.24985266 | 8.721234463 | 9.978623513 | 9.258826023  | 9.106621385 | 9.563860633 | 9.637714247 | 9.343076964 | 9.543181671 | 9.374448073  | 9.390051046  | 8.964374416 | 9.547527449 | 9.750267299 | 9.52107334  | 9.966824321 | 9.79965132   |
| ZNF146   | 9.259911036 | 8.828525052 | 8.873464085 | 9.98609135  | 10.133432035 | 8.887452198 | 10.41629832 | 9.049547823 | 9.840179876 | 9.554021196 | 9.495878479  | 9.730345698  | 9.103376529 | 7.276170008 | 9.178708265 | 8.75417410  | 9.508206116 | 9.945824256  |
| KDM4C    | 9.997786599 | 9.129159721 | 9.897944187 | 10.1143263  | 9.82560344   | 9.475008149 | 9.620726376 | 9.325717103 | 9.548645733 | 9.603578584 | 9.187726291  | 9.616870009  | 9.60352978  | 8.04214467  | 9.256334686 | 9.525512764 | 9.62363175  | 9.27828778   |
| SIK3     | 9.492258079 | 8.757660285 | 9.175031123 | 9.70586475  | 9.05549774   | 8.971071281 | 9.508546175 | 9.698901137 | 9.665796854 | 9.665796854 | 9.665796854  | 9.665796854  | 9.665796854 | 9.665796854 | 9.665796854 | 9.665796854 | 9.665796854 | 9.665796854  |
| RB14     | 9.611232667 | 8.71673486  | 9.13862150  | 9.293763622 | 9.351106008  | 9.154679207 | 9.206656359 | 9.709494752 | 9.128881824 | 9.128881824 | 9.128881824  | 9.128881824  | 9.128881824 | 9.128881824 | 9.128881824 | 9.128881824 | 9.128881824 | 9.128881824  |
| TWEM115  | 9.503391646 | 10.78242756 | 9.844548881 | 9.492589455 | 10.21895357  | 9.97518399  | 10.0558001  | 9.34614763  | 9.49657703  | 9.458741742 | 9.6416689    | 9.631340542  | 10.03957708 | 10.0114348  | 9.085294471 | 9.344686538 | 9.733780448 | 9.883662582  |
| TRAP2    | 9.569955574 | 9.092577938 | 8.249650318 | 8.251144085 | 9.125144085  | 9.125144085 | 9.125144085 | 9.125144085 | 9.125144085 | 9.125144085 | 9.125144085  | 9.125144085  | 9.125144085 | 9.125144085 | 9.125144085 | 9.125144085 | 9.125144085 | 9.125144085  |
| FAM179B  | 9.573818955 | 9.414832866 | 9.490406756 | 9.300767817 | 8.879938027  | 9.50877827  | 9.544506699 | 9.533127342 | 9.218674969 | 9.431492074 | 9.175056391  | 9.642752774  | 10.068465   | 9.544425806 | 9.446757949 | 9.861006281 | 9.736212858 | 9.641482215  |
| UBRS     | 9.818487957 | 9.572491112 | 9.505362181 | 9.903192046 | 8.633277703  | 9.736746427 | 8.625438064 | 9.510452777 | 8.66514736  | 9.684910426 | 9.211411074  | 8.631590174  | 9.06719517  | 9.032097577 | 9.748479383 | 9.304489233 | 9.642786232 | 9.680858843  |
| DDX27    | 9.451775012 | 9.759696724 | 9.590992187 | 10.1044884  | 8.621764352  | 9.572571607 | 9.290960556 | 9.337176588 | 9.644507372 | 9.340551134 | 9.588849825  | 9.089813993  | 9.751674966 | 8.86046536  | 9.54605434  | 9.651933775 | 9.336846285 | 9.343615013  |
| CHMP3    | 10.08568432 | 9.473537781 | 9.314027168 | 9.10540788  | 10.23629816  | 9.688075694 | 9.539749008 | 9.163893899 | 9.866230289 | 9.522978956 | 9.522978956  | 9.522978956  | 9.522978956 | 9.522978956 | 9.522978956 | 9.522978956 | 9.522978956 | 9.522978956  |
| DPH1     | 9.484450336 | 9.00186627  | 10.2358970  | 10.2358970  | 10.07651504  | 9.522336939 | 9.17849755  | 9.336263515 | 9.277202848 | 9.431598559 | 9.059688057  | 9.749197718  | 9.885927544 | 9.367976636 | 9.507528459 | 9.263230266 | 9.448890031 | 9.327828949  |
| PSEN1    | 9.279782316 | 9.870239141 | 9.70584669  | 9.03473149  | 9.42042503   | 9.342424869 | 9.488876127 | 9.564536667 | 9.639232751 | 9.425201601 | 9.51467861   | 9.135991343  | 9.503004987 | 10.0440794  | 9.27490963  | 9.611358811 | 9.615173207 | 9.128265077  |
| CS       | 9.25318667  | 9.570373708 | 9.273541745 | 9.639499792 | 9.216551975  | 9.380924694 | 9.498643152 | 9.744172674 | 9.408940344 | 9.545979309 | 9.662019586  | 9.360087073  | 9.131476193 | 8.753748873 | 9.897125733 | 9.492889420 | 9.552157139 | 9.82884652   |
| TRAP2    | 9.46501717  | 10.38084852 | 8.807135458 | 9.32621096  | 8.472725135  | 9.76997181  | 9.40530663  | 9.596318759 | 9.954370341 | 9.571695965 | 9.812934221  | 9.574591655  | 8.404396612 | 9.625459647 | 9.461793969 | 9.453839757 | 9.453839757 | 9.453839757  |
| SNK241   | 9.490638964 | 10.29198213 | 9.682231669 | 9.49827391  | 9.49827391   | 9.49827391  | 9.49827391  | 9.49827391  | 9.49827391  | 9.49827391  | 9.49827391   | 9.49827391   | 9.49827391  | 9.49827391  | 9.49827391  | 9.49827391  | 9.49827391  | 9.49827391   |
| SMARCE1  | 9.490638964 | 10.29198213 | 9.682231669 | 9.49827391  | 9.49827391   | 9.49827391  | 9.49827391  | 9.49827391  | 9.49827391  | 9.49827391  | 9.49827391   | 9.49827391   | 9.49827391  | 9.49827391  | 9.49827391  | 9.49827391  | 9.49827391  | 9.49827391   |
| MALTI    | 8.642557    | 8.45630400  | 9.406115881 | 9.79975313  | 9.49643806   | 8.985154573 | 8.414898213 | 9.711203034 | 9.490293974 | 9.396096863 | 9.924676388  | 9.524434507  | 10.27610685 | 8.625873773 | 9.868259739 | 10.0503977  | 9.788593188 | 9.780582938  |
| STK40    | 9.146584339 | 9.901292949 | 9.344332094 | 9.569408099 | 9.069902978  | 9.699612418 | 9.277563055 | 9.711497446 | 9.241308178 | 9.549280418 | 9.808682998  | 9.870642247  | 9.525867916 | 9.462213357 | 9.865192569 | 9.811655935 | 9.811655935 | 9.811655935  |
| CD19     | 8.83338975  | 9.306244348 | 9.098382159 | 9.655216338 | 9.60097508   | 9.100517264 | 9.341340103 | 9.085420057 | 9.830453247 | 9.830453247 | 9.830453247  | 9.830453247  | 9.830453247 | 9.830453247 | 9.830453247 | 9.830453247 | 9.830453247 | 9.830453247  |
| SFBI     | 9.532805184 | 9.572508352 | 9.924960444 | 9.917504734 | 9.508642932  | 9.660893376 | 9.632079391 | 9.186142061 | 9.579004954 | 9.105206364 | 9.476526673  | 9.906739188  | 9.473938822 | 9.5458961   | 8.800189882 | 9.558525165 | 9.924232525 | 9.924232525  |
| EGLN1    | 9.986402414 | 9.74626604  | 9.902637058 | 9.555581175 | 9.745727964  | 9.426374832 | 9.568577745 | 9.328923015 | 9.709108971 | 9.064784444 | 9.33641162   | 9.152694774  | 9.279031747 | 9.98675448  | 9.629390093 | 9.704525524 | 9.150221157 | 9.258045049  |
| TWEM115  | 9.545952511 | 9.05639268  | 9.431854194 | 9.545952511 | 9.431854194  | 9.431854194 | 9.431854194 | 9.431854194 | 9.431854194 | 9.431854194 | 9.431854194  | 9.431854194  | 9.431854194 | 9.431854194 | 9.431854194 | 9.431854194 | 9.431854194 | 9.431854194  |
| IFST     | 9.940740216 | 10.15047429 | 9.270995233 | 9.471092929 | 9.379009029  | 9.386494235 | 9.074498959 | 9.406430421 | 9.90404723  | 9.90404723  | 9.90404723   | 9.90404723   | 9.90404723  | 9.90404723  | 9.90404723  | 9.90404723  | 9.90404723  | 9.90404723   |
| MAGEH1   | 9.222696233 | 9.75974615  | 9.155024076 | 9.287880177 | 9.886160133  | 9.517385415 | 10.01879063 | 9.569776894 | 9.523641021 | 9.121120886 | 9.643352139  | 10.01484894  | 9.196699588 | 9.822736311 | 9.355350727 | 9.619939869 | 9.239761978 | 9.728912151  |
| SDF2     | 10.08135479 | 9.675599492 | 9.888324067 | 9.877482116 | 9.591054956  | 9.301459214 | 9.127234628 | 9.408305129 | 9.408305129 | 9.408305129 | 9.408305129  | 9.408305129  | 9.408305129 | 9.408305129 | 9.408305129 | 9.408305129 | 9.408305129 | 9.408305129  |
| GNR12    | 9.470960643 | 9.31218558  | 9.850905328 | 9.916380439 | 9.549556514  | 9.332075742 | 9.669950086 | 9.648304094 | 9.424532212 | 9.349724877 | 9.405723905  | 9.761894399  | 9.300251219 | 9.238050214 | 9.556770966 | 9.428792884 | 9.502338991 | 9.366991121  |
| MLP20    | 9.919688415 | 9.854577481 | 9.641053714 | 9.841668689 | 9.802455258  | 9.560838875 | 9.303542535 | 9.819730272 | 9.157172957 | 9.842558351 | 9.567723967  | 9.60441959   | 9.931974218 | 9.321532529 | 9.55935992  | 9.434389926 | 9.434389926 | 9.434389926  |
| NME4     | 9.086591587 | 9.874013103 | 10.06520709 | 9.402428959 | 9.488183493  | 9.635603138 | 9.750311376 | 9.191648521 | 9.891057058 | 9.573008917 | 9.479517011  | 8.74697002   | 9.1675891   | 9.72839596  | 9.053379968 | 9.528791093 | 9.2087358   | 9.899566778  |
| TWEM115  | 9.545952511 | 9.05639268  | 9.431854194 | 9.545952511 | 9.431854194  | 9.431854194 | 9.431854194 | 9.431854194 | 9.431854194 | 9.431854194 | 9.431854194  | 9.431854194  | 9.431854194 | 9.431854194 | 9.431854194 | 9.431854194 | 9.431854194 | 9.431854194  |
| SCZ15A   | 9.293450645 | 9.287077115 | 9.2840704   | 9.2840704   | 9.2840704    | 9.2840704   | 9.2840704   | 9.2840704   | 9.2840704   | 9.2840704   | 9.2840704    | 9.2840704    | 9.2840704   | 9.2840704   | 9.2840704   | 9.2840704   | 9.2840704   | 9.2840704    |
| PSMD1    | 9.780690613 | 9.23652128  | 9.337057812 | 9.393374525 | 9.792796209  | 9.50593998  | 9.430993863 | 10.00211739 | 9.563205362 | 9.890385581 | 9.336809589  | 10.049724379 | 9.429445285 | 9.928379739 | 9.538009041 | 9.690740108 | 9.457863990 | 9.434291267  |
| UBA3     | 9.68702123  | 9.54254253  | 9.097202322 | 9.343229662 | 9.901062226  | 9.039608063 | 9.77761491  | 9.611865211 | 9.577206099 | 9.879068683 | 10.049278106 | 9.283186045  | 8.892272746 | 9.239989572 | 9.289961129 | 9.728961129 | 9.728961129 | 9.728961129  |
| FEC4     | 9.308295352 | 9.960400493 | 9.960400493 | 10.07570389 | 10.14431345  | 9.874783366 | 8.489698646 | 9.400929778 | 9.66515407  | 9.27063356  | 9.20271397   | 10.00162004  | 9.979271428 | 9.534928585 | 9.056945772 | 9.876406582 | 9.407801357 | 9.427108395  |
| CTR9     | 9.883946615 | 8.812038332 | 10.1948878  | 9.925694769 | 9.622757146  | 9.894403503 | 8.721918725 | 9.499261896 | 9.488597696 | 9.555016422 | 9.83739923   | 9.453626005  | 9.090210605 | 10.07307025 | 9.344568839 | 9.704064032 | 9.472758193 | 9.492208434  |
| NLRP1    | 9.399647059 | 9.129095619 | 10.38219016 | 9.234954983 | 9.103412697  | 8.579676074 | 9.865791426 | 10.10147600 | 9.263088693 | 10          |              |              |             |             |             |             |             |              |

|          |              |             |             |             |             |              |             |             |             |             |             |             |             |             |             |             |             |             |
|----------|--------------|-------------|-------------|-------------|-------------|--------------|-------------|-------------|-------------|-------------|-------------|-------------|-------------|-------------|-------------|-------------|-------------|-------------|
| ORC3     | 9.388146645  | 10.22332285 | 9.994770799 | 9.56763331  | 9.90729775  | 9.297662045  | 9.580795018 | 9.191193468 | 9.646729407 | 9.221186027 | 9.402280861 | 10.23570573 | 8.994278466 | 9.064150895 | 9.119679052 | 9.234156831 | 9.513786411 | 9.647142597 |
| PR2RY10  | 8.533602489  | 9.748053378 | 8.794090853 | 9.783190723 | 8.754760588 | 9.68211962   | 9.933245073 | 9.14961627  | 9.92626878  | 9.236429408 | 9.120851346 | 9.371093304 | 10.06140095 | 9.204453078 | 9.667836083 |             |             |             |
| ITC      | 9.437173684  | 9.597637007 | 8.740094448 | 9.303177741 | 9.70122555  | 7.464319855  | 8.882531848 | 9.624964452 | 9.348304816 | 9.79465273  | 10.99991825 | 7.534288315 | 9.86389875  | 8.95421043  | 9.476891578 | 9.53307182  | 9.57763411  | 9.68010519  |
| IGF1     | 8.849830172  | 9.773056752 | 9.189235945 | 8.378499342 | 9.741550481 | 9.854382994  | 9.621843168 | 9.762385379 | 9.52047733  | 9.318906739 | 9.37546362  | 9.35995885  | 8.481391942 | 9.263980315 | 9.630139706 | 9.232880325 | 9.427429901 | 9.12090355  |
| ADZ1     | 9.130326143  | 9.470635633 | 9.470635633 | 9.078230249 | 9.470635633 | 9.470635633  | 9.234705138 | 9.270411639 | 9.36651249  | 9.26522249  | 9.67670766  | 9.599576693 | 9.525457001 | 9.734422957 | 9.752094691 | 9.24627346  | 9.457562186 | 9.371953347 |
| RPAP2    | 9.566223866  | 9.72026168  | 9.661791996 | 9.86678799  | 9.621050477 | 9.621050477  | 9.621050477 | 9.621050477 | 9.72919679  | 9.368242012 | 9.368242012 | 9.368242012 | 9.368242012 | 9.368242012 | 9.368242012 | 9.368242012 | 9.368242012 | 9.368242012 |
| DMT1F    | 9.762020679  | 9.037906345 | 9.168156207 | 9.257028448 | 9.688478791 | 9.855352909  | 9.144053568 | 9.500644431 | 9.393141611 | 9.594698794 | 9.40349102  | 9.251170995 | 9.081001572 | 9.077625023 | 9.98010231  | 9.576360477 | 9.99067976  | 9.421418966 |
| NIPBL    | 9.505208123  | 9.952408412 | 9.390081384 | 9.381483261 | 9.035408412 | 9.035408412  | 9.035408412 | 9.035408412 | 9.035408412 | 9.035408412 | 9.035408412 | 9.035408412 | 9.035408412 | 9.035408412 | 9.035408412 | 9.035408412 | 9.035408412 | 9.035408412 |
| MRFA11L  | 9.935835818  | 10.33486832 | 10.12332524 | 9.513997121 | 10.1860074  | 9.480783557  | 9.742497564 | 9.877994458 | 9.2752155   | 10.12960724 | 9.83688211  | 10.10178484 | 9.864412338 | 9.268089057 | 9.008019374 | 9.422287789 | 9.169173538 | 9.176244213 |
| TMEM106B | 9.953087805  | 9.24652038  | 9.765087805 | 9.765087805 | 9.24652038  | 9.24652038   | 9.24652038  | 9.24652038  | 9.24652038  | 9.24652038  | 9.24652038  | 9.24652038  | 9.24652038  | 9.24652038  | 9.24652038  | 9.24652038  | 9.24652038  | 9.24652038  |
| ADH6A1   | 8.927890583  | 9.92845135  | 9.712101519 | 8.60421019  | 9.10208466  | 9.386077475  | 9.67006886  | 9.090496781 | 9.729750886 | 9.38257849  | 9.095714952 | 10.20753888 | 8.218268898 | 9.87958074  | 9.296418307 | 8.779114922 | 9.177475953 | 9.156536838 |
| HWF1F    | 9.148177544  | 9.148177544 | 9.148177544 | 9.148177544 | 9.148177544 | 9.148177544  | 9.148177544 | 9.148177544 | 9.148177544 | 9.148177544 | 9.148177544 | 9.148177544 | 9.148177544 | 9.148177544 | 9.148177544 | 9.148177544 | 9.148177544 | 9.148177544 |
| ADZ1     | 9.42372583   | 9.42372583  | 9.42372583  | 9.42372583  | 9.42372583  | 9.42372583   | 9.42372583  | 9.42372583  | 9.42372583  | 9.42372583  | 9.42372583  | 9.42372583  | 9.42372583  | 9.42372583  | 9.42372583  | 9.42372583  | 9.42372583  | 9.42372583  |
| VPS13C   | 9.567108863  | 9.141403276 | 10.09891783 | 8.988776019 | 9.797468859 | 9.258201716  | 9.20773841  | 9.506278669 | 9.983946997 | 9.858180478 | 9.078337606 | 9.3006205   | 9.276537253 | 10.19393517 | 9.396151541 | 9.700484996 | 9.503845147 | 9.857308289 |
| TOR1A1P2 | 9.672623723  | 9.132849317 | 9.456916315 | 9.132849317 | 9.456916315 | 9.132849317  | 9.132849317 | 9.132849317 | 9.132849317 | 9.132849317 | 9.132849317 | 9.132849317 | 9.132849317 | 9.132849317 | 9.132849317 | 9.132849317 | 9.132849317 | 9.132849317 |
| PCOD5    | 9.780741113  | 9.95032501  | 9.367489923 | 9.52931342  | 9.61938081  | 9.186196646  | 9.346613013 | 9.023510313 | 9.528028733 | 9.162112533 | 9.155798706 | 9.64635825  | 10.0445322  | 9.154730952 | 8.870452912 | 9.210522043 | 9.125952073 | 9.849671719 |
| FAAP100  | 9.53120754   | 9.23480332  | 9.861758484 | 9.366202434 | 8.961758484 | 9.696912932  | 9.620752216 | 9.2910163   | 9.702443793 | 9.896841608 | 9.805598751 | 9.987657408 | 9.159048163 | 9.570312099 | 9.065406615 | 9.75897474  | 9.127886948 | 9.261486878 |
| PIOD1    | 8.974644325  | 9.179830411 | 9.052099148 | 9.962807748 | 9.008178324 | 9.208626001  | 10.00210777 | 9.303364366 | 9.587308302 | 9.177278602 | 9.74056264  | 9.478766942 | 9.672613653 | 8.603283988 | 9.514029369 | 9.415387123 | 9.11068621  | 9.594902111 |
| ALG12    | 8.991552265  | 9.561459386 | 9.12319917  | 9.392301748 | 9.19159765  | 9.767591137  | 9.43187247  | 9.435257968 | 9.458620071 | 9.11717056  | 9.11717056  | 9.798371786 | 10.02575384 | 9.858125387 | 9.835613161 | 9.343566641 | 9.401832348 | 9.743420982 |
| ZH2Z     | 9.516380487  | 9.839603335 | 9.397197089 | 9.286621145 | 9.531774571 | 9.42726309   | 9.17341308  | 9.852659692 | 9.422749531 | 9.724656334 | 9.466260684 | 9.371417654 | 9.112421722 | 9.42474881  | 9.544753671 | 9.529528086 | 9.462847985 | 9.021468801 |
| TSEN4    | 10.134934448 | 9.538188872 | 9.722690799 | 9.425489269 | 9.915610358 | 9.915610358  | 9.7454742   | 9.12108312  | 9.534154862 | 9.230721827 | 9.230721827 | 9.230721827 | 9.230721827 | 9.230721827 | 9.230721827 | 9.230721827 | 9.230721827 | 9.230721827 |
| ZPTD1    | 9.447082479  | 9.237250795 | 9.68572423  | 9.444267423 | 9.127842113 | 10.0108387   | 9.714694807 | 9.832858519 | 9.41834945  | 9.958568683 | 8.503147088 | 8.62937984  | 8.11076638  | 9.548343873 | 9.928185032 | 9.47016665  | 9.802578296 | 9.328578296 |
| KHL5     | 9.54051985   | 9.947984714 | 9.13232207  | 10.00362565 | 9.340177383 | 10.457359312 | 10.33523    | 9.513275624 | 9.76766854  | 9.51628844  | 10.00771008 | 9.42405073  | 9.538287492 | 9.533286964 | 9.221743109 | 9.377222676 | 9.367619001 | 9.309238842 |
| THAP7    | 9.986276465  | 10.09082526 | 9.164730861 | 9.074372412 | 9.701930464 | 9.074372412  | 9.074372412 | 9.074372412 | 9.074372412 | 9.074372412 | 9.074372412 | 9.074372412 | 9.074372412 | 9.074372412 | 9.074372412 | 9.074372412 | 9.074372412 | 9.074372412 |
| HIA-DA1  | 9.715189986  | 9.064748914 | 9.256742994 | 8.370875667 | 9.533606511 | 9.105703121  | 9.395742852 | 9.421956165 | 9.274295348 | 9.497233471 | 9.583875695 | 9.77578991  | 8.607641384 | 9.457564679 | 9.674126881 | 9.626076004 | 9.779276381 | 9.299026029 |
| UBE2M    | 9.767713436  | 9.785778764 | 9.425080856 | 9.468583939 | 9.748446639 | 9.602293596  | 9.703289007 | 9.348752483 | 9.460619337 | 9.125618371 | 9.40291828  | 9.256653839 | 9.426829444 | 9.743339038 | 9.271304138 | 9.31757441  | 9.284450151 | 9.565653476 |
| NR2F     | 9.635384969  | 9.485134584 | 9.064748552 | 9.064748552 | 9.064748552 | 9.064748552  | 9.064748552 | 9.064748552 | 9.064748552 | 9.064748552 | 9.064748552 | 9.064748552 | 9.064748552 | 9.064748552 | 9.064748552 | 9.064748552 | 9.064748552 | 9.064748552 |
| MUT      | 9.877899598  | 9.446350922 | 9.320583013 | 9.969815129 | 9.981938153 | 9.243662793  | 9.43567052  | 9.178474724 | 9.124456751 | 9.523780616 | 9.195740133 | 9.815000222 | 9.624521185 | 9.912901922 | 9.429545661 | 9.449780773 | 9.331443084 | 9.615403754 |
| VAT1     | 9.94675933   | 9.363656098 | 9.43347773  | 9.866311852 | 9.526340246 | 9.452039399  | 9.601939281 | 9.504195617 | 9.601939281 | 9.349450831 | 9.45561364  | 9.349501552 | 9.610161325 | 9.153297256 | 9.6048293   | 9.507829471 | 9.236427748 | 9.748040168 |
| FOXP1    | 9.238098319  | 8.870644129 | 9.857409348 | 9.531480618 | 10.04522373 | 8.94718161   | 9.61407576  | 9.424897009 | 9.349450831 | 9.4914318   | 9.45561364  | 9.349501552 | 9.610161325 | 9.153297256 | 9.6048293   | 9.507829471 | 9.236427748 | 9.748040168 |
| TUT1     | 9.1698561    | 9.25641029  | 9.399910557 | 9.1698561   | 9.25641029  | 9.399910557  | 9.1698561   | 9.25641029  | 9.399910557 | 9.1698561   | 9.25641029  | 9.399910557 | 9.1698561   | 9.25641029  | 9.399910557 | 9.1698561   | 9.25641029  | 9.399910557 |
| ARPC5L   | 9.36110423   | 9.680464742 | 9.374757508 | 9.433591767 | 9.691099133 | 9.724796     | 9.17363254  | 9.184629488 | 9.789175592 | 9.099872343 | 9.44854464  | 9.55240939  | 10.16008887 | 9.464038743 | 9.336519063 | 9.347806205 | 9.13712391  | 9.274799407 |
| WH1      | 10.2659717   | 9.361973988 | 9.108275214 | 9.361973988 | 9.108275214 | 9.361973988  | 9.108275214 | 9.361973988 | 9.108275214 | 9.361973988 | 9.108275214 | 9.361973988 | 9.108275214 | 9.361973988 | 9.108275214 | 9.361973988 | 9.108275214 | 9.361973988 |
| STK11    | 9.189432816  | 9.10140525  | 9.684856665 | 9.10140525  | 9.684856665 | 9.10140525   | 9.684856665 | 9.10140525  | 9.684856665 | 9.10140525  | 9.684856665 | 9.10140525  | 9.684856665 | 9.10140525  | 9.684856665 | 9.10140525  | 9.684856665 | 9.10140525  |
| INTS8    | 9.100874485  | 9.379428992 | 9.796142576 | 9.48970453  | 10.2108527  | 8.616295703  | 9.95877695  | 9.093348446 | 9.426543957 | 9.544523314 | 9.58944584  | 10.10195466 | 9.546571144 | 9.742715164 | 9.479357679 | 9.440033554 | 9.376211169 | 9.294177023 |
| NUGC     | 9.50461789   | 9.505296337 | 9.062436958 | 9.504315879 | 9.63592493  | 8.902488192  | 9.81031216  | 9.27662135  | 9.278702745 | 9.27029982  | 9.496429984 | 9.705617284 | 9.094034887 | 9.597490679 | 9.518573429 | 9.525188279 | 9.405508727 | 9.307396727 |
| ZDHX4C   | 9.624546524  | 9.96369164  | 9.85995333  | 10.07878136 | 9.596843832 | 9.21198689   | 9.163796549 | 9.07760188  | 9.258429397 | 9.35569138  | 9.513899192 | 9.783889548 | 10.29284792 | 9.145581163 | 9.237761821 | 9.640441588 | 9.05258881  | 9.539346043 |
| DCN3     | 10.04256024  | 9.93107522  | 9.834641969 | 9.376089577 | 9.426668296 | 10.15253676  | 9.774932534 | 9.174864471 | 9.414387603 | 9.376089577 | 9.376089577 | 9.376089577 | 9.376089577 | 9.376089577 | 9.376089577 | 9.376089577 | 9.376089577 | 9.376089577 |
| PKRAC    | 9.54601948   | 10.01233746 | 9.54601948  | 9.54601948  | 10.01233746 | 9.54601948   | 10.01233746 | 9.54601948  | 10.01233746 | 9.54601948  | 10.01233746 | 9.54601948  | 10.01233746 | 9.54601948  | 10.01233746 | 9.54601948  | 10.01233746 | 9.54601948  |
| SUCLG2   | 9.44352891   | 9.13849381  | 9.901251136 | 9.838519259 | 9.660215762 | 9.33009877   | 9.69728115  | 8.838031792 | 9.269162823 | 9.269162823 | 9.38155119  | 9.72037096  | 9.269081627 | 8.541413127 | 9.062813228 | 9.546664248 | 9.128489721 | 9.712008554 |
| NUK1     | 9.423936587  | 9.49512376  | 9.423936587 | 9.49512376  | 9.423936587 | 9.49512376   | 9.423936587 | 9.49512376  | 9.423936587 | 9.49512376  | 9.423936587 | 9.49512376  | 9.423936587 | 9.49512376  | 9.423936587 | 9.49512376  | 9.423936587 | 9.49512376  |
| ANP32    | 9.70568037   | 9.213548951 | 9.478405354 | 9.498886808 | 9.494178886 | 9.775144377  | 9.276967763 | 9.139499233 | 9.763954572 | 9.164770949 | 9.59307527  | 9.427810161 | 9.546809528 | 9.1880054   |             |             |             |             |



|           |              |             |             |             |             |             |             |              |             |             |             |             |             |             |             |              |             |             |
|-----------|--------------|-------------|-------------|-------------|-------------|-------------|-------------|--------------|-------------|-------------|-------------|-------------|-------------|-------------|-------------|--------------|-------------|-------------|
| LARP4     | 8.917274256  | 8.411233266 | 8.919369708 | 8.866762655 | 9.091780828 | 9.52002569  | 9.039895822 | 9.460242507  | 9.47230584  | 9.253283862 | 9.480220285 | 9.622430009 | 9.498539975 | 9.357579223 | 9.540260979 | 9.495364429  | 9.324660565 | 9.726959201 |
| FAM174A   | 9.711646109  | 9.343266084 | 9.397380094 | 8.753737666 | 9.819854864 | 9.739435708 | 10.00066714 | 9.263707237  | 9.22786202  | 9.491141695 | 9.521143196 | 9.961251695 | 9.547979104 | 9.145480089 | 9.445420212 | 9.315878995  | 9.489442529 | 9.186452132 |
| RMH47     | 9.4165270882 | 9.494457197 | 9.517527666 | 9.266589823 | 9.494457197 | 9.517527666 | 9.266589823 | 9.494457197  | 9.517527666 | 9.266589823 | 9.494457197 | 9.517527666 | 9.266589823 | 9.494457197 | 9.517527666 | 9.266589823  | 9.494457197 | 9.517527666 |
| NSUN2     | 9.377914031  | 9.234140403 | 9.407939887 | 9.922529097 | 9.243113523 | 9.520595902 | 8.628981422 | 9.347182795  | 9.602283299 | 9.660543741 | 9.437646579 | 9.312832814 | 9.173493957 | 8.61245454  | 9.603570278 | 9.699395531  | 9.528388852 | 9.450909705 |
| DKS       | 9.471126403  | 8.541327004 | 8.446951724 | 9.426737904 | 9.138274869 | 9.138274869 | 8.483241187 | 9.550966991  | 9.397895016 | 9.397895016 | 9.397895016 | 9.397895016 | 9.397895016 | 9.397895016 | 9.397895016 | 9.397895016  | 9.397895016 | 9.397895016 |
| RF1       | 9.626414549  | 9.824933655 | 9.718429046 | 9.194552167 | 9.194552167 | 9.194552167 | 9.194552167 | 9.194552167  | 9.194552167 | 9.194552167 | 9.194552167 | 9.194552167 | 9.194552167 | 9.194552167 | 9.194552167 | 9.194552167  | 9.194552167 | 9.194552167 |
| GOLBAR    | 8.437259198  | 9.948757063 | 8.896609511 | 9.578547406 | 10.11023509 | 9.837339634 | 9.561780625 | 8.820888001  | 9.412422441 | 9.793472137 | 9.404477727 | 8.86629254  | 9.384448939 | 8.20387855  | 9.816425007 | 9.508532194  | 9.431034832 | 9.548108554 |
| GABARAFL1 | 9.185949259  | 9.143034366 | 9.248066543 | 9.945920839 | 9.238439595 | 9.361408396 | 9.210981843 | 9.941811054  | 10.15990133 | 9.941811054 | 10.15990133 | 9.941811054 | 10.15990133 | 9.941811054 | 10.15990133 | 9.941811054  | 10.15990133 | 9.941811054 |
| CAPN7     | 9.107853684  | 9.807381121 | 9.706527055 | 10.2520376  | 9.843765205 | 9.695952704 | 8.800232106 | 9.261901242  | 9.399920992 | 9.778528201 | 9.412081541 | 9.817783696 | 8.90152791  | 8.953730265 | 9.472146683 | 9.93073355   | 9.944398676 | 9.281177902 |
| TNP01     | 9.975259016  | 8.514788884 | 9.026248054 | 9.320283079 | 9.320283079 | 9.320283079 | 9.320283079 | 9.320283079  | 9.320283079 | 9.320283079 | 9.320283079 | 9.320283079 | 9.320283079 | 9.320283079 | 9.320283079 | 9.320283079  | 9.320283079 | 9.320283079 |
| CABL51    | 8.790831068  | 9.138706828 | 8.603399628 | 9.809747188 | 9.281693107 | 8.665039421 | 8.603399628 | 9.809747188  | 9.281693107 | 8.665039421 | 9.809747188 | 9.281693107 | 8.665039421 | 9.809747188 | 9.281693107 | 8.665039421  | 9.809747188 | 9.281693107 |
| RASA3     | 9.898880296  | 9.591551157 | 9.543067176 | 9.294466066 | 9.197370496 | 9.108759501 | 9.695979992 | 9.375016047  | 9.729458518 | 9.455689583 | 9.804977484 | 9.959869898 | 9.230175471 | 8.899943888 | 9.932788211 | 9.191966463  | 9.213960498 | 9.254434791 |
| CSF6      | 9.255649588  | 9.305094312 | 8.627878708 | 10.2980711  | 9.057748013 | 9.410291206 | 9.396239663 | 9.412211376  | 9.351009493 | 9.732432663 | 10.07648744 | 10.08598751 | 9.138978667 | 9.717270532 | 9.29594979  | 9.25324657   |             |             |
| BRD7      | 9.596479589  | 9.380030067 | 9.197884854 | 9.309698004 | 10.30583899 | 9.875020502 | 10.01619145 | 9.413324353  | 9.582592816 | 9.296007576 | 9.390181143 | 9.358222292 | 9.032657705 | 9.503000044 | 9.503408091 | 9.406560888  | 9.400179265 | 8.97414514  |
| COP55     | 9.774205084  | 9.290294558 | 9.862576245 | 9.373213738 | 9.940330303 | 9.825020489 | 9.291713429 | 9.119484726  | 9.684737759 | 9.425959649 | 8.843451382 | 9.544631944 | 9.065877593 | 9.290252378 | 9.490270587 | 8.854490505  |             |             |
| CYTH2     | 9.378213356  | 8.402544812 | 9.892937119 | 10.04208299 | 9.394280531 | 9.966483034 | 9.707408688 | 9.297306068  | 9.410439267 | 9.80395194  | 9.370335841 | 10.24960095 | 9.669519744 | 9.200141898 | 9.354199251 | 9.578538863  | 1.69822557  | 9.40838717  |
| SGK3      | 9.860187229  | 8.450669432 | 8.450669432 | 8.450669432 | 8.450669432 | 8.450669432 | 8.450669432 | 8.450669432  | 8.450669432 | 8.450669432 | 8.450669432 | 8.450669432 | 8.450669432 | 8.450669432 | 8.450669432 | 8.450669432  | 8.450669432 | 8.450669432 |
| GOLG8B    | 8.824060366  | 9.038951297 | 8.389209621 | 10.10820989 | 9.738956343 | 9.256113659 | 8.779695601 | 10.447261583 | 8.456713397 | 9.40825035  | 8.703199723 | 9.005025592 | 9.060898298 | 9.54082163  | 9.904872175 | 9.623895814  | 10.24947345 | 10.02958038 |
| AZ2       | 9.30056518   | 9.008693915 | 9.319113906 | 9.616382973 | 9.685198427 | 9.510918244 | 9.511916768 | 9.142250183  | 9.456054111 | 9.240013929 | 9.345030217 | 9.987401276 | 9.693149694 | 9.619040987 | 9.24445189  | 9.543758677  | 9.14577138  | 9.725101679 |
| KDML1     | 9.42841878   | 9.748543044 | 9.559834661 | 9.13979749  | 9.513011477 | 9.71052047  | 9.174805718 | 9.902579885  | 9.285937205 | 9.38594192  | 9.127715316 | 9.604127174 | 9.679907979 | 9.60672458  | 9.188405798 | 9.53656806   | 9.163271688 | 9.750326076 |
| TURG1     | 9.298201505  | 9.22323323  | 9.870315534 | 9.965791542 | 9.965791542 | 9.965791542 | 9.965791542 | 9.965791542  | 9.965791542 | 9.965791542 | 9.965791542 | 9.965791542 | 9.965791542 | 9.965791542 | 9.965791542 | 9.965791542  | 9.965791542 | 9.965791542 |
| SLC7A     | 9.207845423  | 10.03748523 | 8.849447374 | 9.764874112 | 8.731595725 | 8.996711891 | 8.67792221  | 9.3280284514 | 9.102402197 | 9.168677174 | 9.289848187 | 9.94025759  | 9.683275166 | 9.144697378 | 9.12372442  | 9.349786267  | 1.886575282 | 9.38371123  |
| RUVB1L2   | 9.695271553  | 10.17490041 | 10.15787483 | 9.02419007  | 9.134483792 | 9.414465023 | 9.706435791 | 9.192529722  | 9.410910247 | 9.168677174 | 9.289848187 | 9.94025759  | 9.683275166 | 9.144697378 | 9.12372442  | 9.349786267  | 1.886575282 | 9.38371123  |
| ALG9      | 9.155279078  | 9.229670873 | 9.862915017 | 9.945397046 | 9.461322672 | 9.945397046 | 9.461322672 | 9.945397046  | 9.461322672 | 9.945397046 | 9.461322672 | 9.945397046 | 9.461322672 | 9.945397046 | 9.461322672 | 9.945397046  | 9.461322672 | 9.945397046 |
| DL1       | 9.518581694  | 9.38611948  | 9.405623667 | 9.93026875  | 9.88993302  | 9.482993302 | 9.88993302  | 9.482993302  | 9.88993302  | 9.482993302 | 9.88993302  | 9.482993302 | 9.88993302  | 9.482993302 | 9.88993302  | 9.482993302  | 9.88993302  | 9.482993302 |
| LWRD1     | 9.37949043   | 9.825055624 | 9.451302945 | 9.52035504  | 8.787759998 | 9.825055624 | 9.120193784 | 9.810967003  | 9.704128177 | 9.41325949  | 9.10452615  | 9.75178985  | 9.97126279  | 9.530336535 | 9.133273494 | 9.41447551   | 9.18423413  | 9.95535066  |
| KIAA1033  | 9.498193988  | 9.347030722 | 9.671904001 | 9.326773934 | 9.187365629 | 9.546013951 | 9.11359601  | 9.860313818  | 9.607510665 | 9.459994745 | 9.6751022   | 9.06025223  | 10.04876622 | 9.747723221 | 9.638041286 | 9.516157682  | 9.26677172  | 9.59206116  |
| TMUB2     | 9.495412978  | 9.594800015 | 9.9344355   | 9.94468205  | 9.533876822 | 9.625137578 | 9.201807973 | 9.451036615  | 9.829381351 | 9.264237852 | 9.64283502  | 9.134112384 | 9.156262661 | 9.35712801  | 9.11664605  | 9.956967608  | 9.10294798  |             |
| CR2       | 8.807181893  | 9.960409279 | 9.386136844 | 9.965516076 | 9.815290293 | 8.921553863 | 8.789639151 | 9.257681501  | 9.239883787 | 9.772615254 | 8.89957118  | 8.99531278  | 9.401880663 | 9.835288672 | 9.765158968 | 9.821266354  | 9.432963844 | 9.553146117 |
| AR1F2     | 9.376594999  | 9.318598643 | 9.318598643 | 9.318598643 | 9.318598643 | 9.318598643 | 9.318598643 | 9.318598643  | 9.318598643 | 9.318598643 | 9.318598643 | 9.318598643 | 9.318598643 | 9.318598643 | 9.318598643 | 9.318598643  | 9.318598643 | 9.318598643 |
| WRD61     | 9.2463316    | 9.96820925  | 9.868633845 | 10.04891018 | 9.664972168 | 9.667761181 | 9.409183136 | 9.02686255   | 9.535686057 | 9.83406264  | 9.37658384  | 9.74122796  | 9.913236853 | 9.293481297 | 9.049429568 | 9.220327446  | 9.141878454 | 9.16301444  |
| CYB81     | 9.499983103  | 9.395416667 | 9.86241699  | 9.059928564 | 9.590819487 | 9.5021151   | 9.394889399 | 9.172498647  | 9.61364612  | 10.08703366 | 9.498149124 | 9.592003591 | 9.246147894 | 9.101363005 | 9.13634931  |              |             |             |
| STK38     | 9.403411116  | 9.717896242 | 7.99643064  | 8.25830301  | 8.300712394 | 10.00923423 | 9.215764573 | 9.697006715  | 9.211066857 | 9.097201347 | 9.380633351 | 9.688199662 | 8.450225566 | 10.06338875 | 10.23031518 | 9.220133603  | 9.521769747 | 10.07985688 |
| YKPF1     | 9.00985092   | 9.409736631 | 9.12769085  | 9.12769085  | 9.12769085  | 9.12769085  | 9.12769085  | 9.12769085   | 9.12769085  | 9.12769085  | 9.12769085  | 9.12769085  | 9.12769085  | 9.12769085  | 9.12769085  | 9.12769085   | 9.12769085  | 9.12769085  |
| SNK25     | 9.380066639  | 9.605348271 | 9.605348271 | 9.605348271 | 9.605348271 | 9.605348271 | 9.605348271 | 9.605348271  | 9.605348271 | 9.605348271 | 9.605348271 | 9.605348271 | 9.605348271 | 9.605348271 | 9.605348271 | 9.605348271  | 9.605348271 | 9.605348271 |
| TPR41     | 9.925188707  | 8.12510877  | 9.428498889 | 9.533049054 | 10.10886910 | 9.145932378 | 9.985262834 | 9.16328614   | 9.372735275 | 9.33920402  | 9.409351917 | 9.50256865  | 9.98989559  | 9.56145096  | 9.865789218 | 9.25662933   | 9.163320697 | 9.345506539 |
| PHK62     | 9.49796465   | 9.618925146 | 9.282254466 | 9.599465769 | 9.18515103  | 9.812875276 | 9.721959955 | 9.388983722  | 9.17363177  | 9.924725311 | 9.322371626 | 9.50545076  | 9.818830687 | 9.617855884 | 9.391469544 | 9.36138778   | 9.591942768 | 9.5357396   |
| MPFG      | 9.52916519   | 10.15668911 | 9.75450625  | 9.384824636 | 9.957468975 | 9.850870108 | 9.93580188  | 9.255280407  | 9.612234343 | 9.181547398 | 9.322006853 | 9.714079106 | 9.99443975  | 9.516548204 | 9.23534441  | 10.019690829 | 12.16635938 | 9.18829675  |
| LEPOT     | 10.82053459  | 9.76057886  | 8.823137029 | 9.442076514 | 9.727778213 | 9.442076514 | 9.727778213 | 9.442076514  | 9.727778213 | 9.442076514 | 9.727778213 | 9.442076514 | 9.727778213 | 9.442076514 | 9.727778213 | 9.442076514  | 9.727778213 | 9.442076514 |
| HUA-DB    | 9.08938696   | 9.589255643 | 9.825820444 | 9.628280001 | 8.300712394 | 10.00923423 | 9.215764573 | 9.697006715  | 9.211066857 | 9.097201347 | 9.380633351 | 9.688199662 | 8.450225566 | 10.06338875 | 10.23031518 | 9.220133603  | 9.521769747 | 10.07985688 |
| YKPF1     | 9.00985092   | 9.409736631 | 9.12769085  | 9.12769085  | 9.12769085  | 9.12769085  | 9.12769085  | 9.12769085   | 9.12769085  | 9.12769085  | 9.12769085  | 9.12769085  | 9.12769085  | 9.12769085  | 9.12769085  | 9.12769085   | 9.12769085  | 9.12769085  |
| EP2M1A1   | 9.257272591  | 9.051450498 | 8.899070064 | 9.850971205 | 9.153409061 | 9.146728648 | 8.846490363 | 9.716977038  | 9.397504314 | 9.172109209 | 9.391774081 | 9.719196471 | 10.470335   | 10.1        |             |              |             |             |

|           |             |              |             |             |             |             |              |             |             |             |             |             |              |             |             |             |             |             |
|-----------|-------------|--------------|-------------|-------------|-------------|-------------|--------------|-------------|-------------|-------------|-------------|-------------|--------------|-------------|-------------|-------------|-------------|-------------|
| NCPB2     | 9.38453177  | 9.25028914   | 9.586603828 | 9.754844207 | 9.45676672  | 9.566257955 | 9.312453361  | 9.145373051 | 9.349684619 | 9.19273571  | 9.533764592 | 9.758532637 | 10.06662421  | 8.407238121 | 9.070893873 | 9.506849298 | 9.319236512 | 9.312198152 |
| PRRFB     | 9.383889259 | 9.423869064  | 9.125060832 | 9.381524154 | 9.001369945 | 9.723991834 | 8.891043957  | 9.446920893 | 9.446920893 | 9.271913265 | 9.057427867 | 9.540210635 | 9.746514847  | 9.886235228 | 9.649418467 | 9.183879288 | 9.598466713 | 9.351507618 |
| MAPK9     | 9.50943182  | 8.638427462  | 9.443529637 | 9.793239232 | 9.438295342 | 9.438295342 | 9.307246647  | 8.862125548 | 9.421864163 | 9.358742755 | 9.729317547 | 9.797842475 | 9.535405843  | 9.373413183 | 9.308176786 | 9.663421225 | 9.589073681 | 8.930695825 |
| FFGS      | 9.624294936 | 9.591421252  | 9.595388493 | 9.479111657 | 9.188791257 | 9.785811095 | 9.375194004  | 9.139513826 | 9.140170346 | 9.090242786 | 9.205748795 | 9.356860417 | 9.69825293   | 10.03008664 | 9.111906227 | 8.785202325 | 9.047126634 | 9.466010818 |
| CFP7      | 9.692133687 | 9.43124268   | 9.855211741 | 9.783786251 | 9.66126685  | 9.585617781 | 9.071898087  | 9.048959957 | 9.167166057 | 9.216371803 | 9.651304625 | 9.529242608 | 9.135105933  | 9.652624008 | 9.293268264 | 9.511448965 | 9.313746109 | 9.596373736 |
| COA1      | 9.178211921 | 9.071956899  | 9.579358741 | 9.377911659 | 9.901486589 | 10.18737713 | 9.318678833  | 9.150940415 | 9.351060687 | 9.59034215  | 9.351060687 | 9.68403514  | 9.230222065  | 9.178274472 | 9.323880788 | 9.533985715 | 9.222501886 | 9.222501886 |
| ADGR5     | 9.764280307 | 9.765001763  | 9.745342053 | 9.748252238 | 8.99411621  | 8.876191625 | 9.805238853  | 9.2812129   | 9.065909557 | 9.444727943 | 9.259436131 | 9.764059645 | 9.916432974  | 9.511928872 | 9.181431165 | 9.066731669 | 9.536131402 | 9.915756248 |
| Clorf122  | 9.603735598 | 10.14125725  | 9.465276015 | 9.570539856 | 9.522677131 | 9.348998881 | 9.379640061  | 9.152263925 | 9.02936265  | 9.90104147  | 9.152263925 | 9.699807102 | 9.88391954   | 9.927210915 | 9.169101477 | 9.839597874 | 9.184211473 | 8.964030319 |
| CARS2     | 9.923840006 | 9.395292953  | 9.426214877 | 9.670477574 | 9.628152268 | 9.142483066 | 9.556888842  | 9.242300464 | 8.814349895 | 9.41583789  | 8.82965032  | 9.396896975 | 9.499747529  | 9.100481122 | 9.395737503 | 8.874145082 | 9.32746538  | 9.004112236 |
| DTW01     | 9.364854311 | 9.472064753  | 9.165994301 | 9.4383436   | 9.472064753 | 9.723499455 | 9.356882169  | 9.687497453 | 9.029105802 | 8.700130793 | 8.843363066 | 10.2069197  | 9.723261525  | 9.693185559 | 8.484085771 | 9.542512547 | 0.056694008 | 9.242412243 |
| LPCNS1    | 9.367405594 | 9.377076577  | 9.4383436   | 9.472064753 | 9.472064753 | 9.29286104  | 9.988922716  | 9.512343484 | 9.125243484 | 9.445165008 | 9.66868923  | 9.130964293 | 9.153746811  | 9.354260852 | 9.147328109 | 9.579752547 | 9.302231647 | 9.907926236 |
| FNK3P     | 9.700704886 | 9.620438403  | 9.973788879 | 9.939670157 | 9.564291102 | 8.782378153 | 8.867517933  | 9.248257266 | 9.105145129 | 9.404468801 | 9.603212159 | 9.893455737 | 9.62975165   | 9.473023473 | 9.489593936 | 9.22138509  | 9.228352352 | 9.516554458 |
| UNOS      | 9.080615512 | 9.610546419  | 9.553990162 | 9.5790255   | 10.08138933 | 9.796881766 | 9.104605552  | 9.104605552 | 9.114774042 | 9.084688877 | 9.5400729   | 9.373009481 | 9.4735878181 | 9.374908506 | 8.915523403 | 9.039546197 | 9.347913358 | 9.255999999 |
| MYO18A    | 9.944479649 | 9.21932519   | 8.75063342  | 9.164265335 | 9.777187514 | 8.727818258 | 9.22958278   | 9.596873154 | 9.951467702 | 8.860000582 | 9.084939528 | 8.278259023 | 10.0138907   | 9.389853664 | 9.767200033 | 9.461485787 | 9.74176517  | 9.330560679 |
| AP5M1     | 9.915874277 | 9.337106193  | 9.5143678   | 9.5143678   | 8.74702662  | 8.874072818 | 8.870003206  | 9.438867235 | 9.981871785 | 9.399976352 | 9.051100499 | 8.664182693 | 9.575078965  | 9.029816935 | 9.36411535  | 9.005313172 | 9.305513288 | 9.305513288 |
| CLASP1    | 7.505702568 | 9.761564902  | 7.921122978 | 9.256419858 | 7.908171883 | 9.186316719 | 9.6045236    | 9.375664772 | 9.767938586 | 10.10327384 | 9.845308151 | 9.342229611 | 7.681592006  | 9.759888342 | 9.914854674 | 9.602322298 | 10.05846315 | 9.619433626 |
| CD26      | 9.66718472  | 9.095641286  | 9.29567392  | 9.574195831 | 9.507602392 | 9.653153486 | 9.206280243  | 9.900241029 | 9.276516806 | 9.022135493 | 9.412284122 | 10.0320813  | 9.762627683  | 9.5881536   | 9.755205003 | 9.173648885 | 8.910937387 | 9.092141781 |
| CHD7      | 8.667183339 | 9.806119921  | 9.806119921 | 9.806119921 | 9.806119921 | 9.806119921 | 9.806119921  | 9.806119921 | 9.806119921 | 9.806119921 | 9.806119921 | 9.806119921 | 9.806119921  | 9.806119921 | 9.806119921 | 9.806119921 | 9.806119921 | 9.806119921 |
| PSCK7     | 10.08831676 | 9.367892922  | 9.361148706 | 9.260611992 | 9.018801984 | 9.799973364 | 8.8351048    | 9.702687936 | 9.12741431  | 9.87509613  | 9.354800517 | 9.321007636 | 9.090365633  | 9.272029539 | 9.706102411 | 9.502953946 | 9.688452465 | 9.779459593 |
| REST      | 9.722429207 | 9.918999933  | 9.173490906 | 9.029627274 | 9.175343439 | 9.734586533 | 9.319710008  | 9.325153575 | 9.119501956 | 9.118775816 | 9.314230281 | 9.445545748 | 10.4255124   | 9.624849996 | 9.388688962 | 9.262277263 | 9.417062127 | 9.417062127 |
| HRHG4     | 9.416608935 | 9.195190425  | 9.195190425 | 9.195190425 | 9.195190425 | 9.195190425 | 9.195190425  | 9.195190425 | 9.195190425 | 9.195190425 | 9.195190425 | 9.195190425 | 9.195190425  | 9.195190425 | 9.195190425 | 9.195190425 | 9.195190425 | 9.195190425 |
| TMEM104   | 9.707326105 | 9.955602045  | 9.243140755 | 9.3866474   | 9.281564679 | 9.563640099 | 9.38298777   | 8.711212911 | 9.427604482 | 9.734646935 | 9.38298777  | 9.468392177 | 9.931513658  | 9.5364251   | 9.94796195  | 9.82821236  | 9.476042027 | 9.476042027 |
| SART1     | 9.438766042 | 10.08561501  | 9.132958192 | 9.557560977 | 8.857464489 | 10.01564813 | 9.322791618  | 9.284661864 | 9.309281624 | 9.341205806 | 9.293110467 | 9.387406616 | 9.463703574  | 9.978702255 | 9.058035664 | 0.033241116 | 9.371044203 | 9.107426065 |
| ASMTL     | 9.141437599 | 9.142894874  | 9.198506345 | 8.896076331 | 8.839458411 | 9.52008789  | 9.388065163  | 9.373223998 | 9.761068792 | 9.912898228 | 9.337445766 | 9.785025575 | 9.854629454  | 9.328408654 | 9.233576785 | 9.676474378 | 9.716985832 | 9.110355592 |
| POCD10    | 9.487601104 | 8.201954277  | 9.887479053 | 9.887479053 | 9.887479053 | 9.887479053 | 9.887479053  | 9.887479053 | 9.887479053 | 9.887479053 | 9.887479053 | 9.887479053 | 9.887479053  | 9.887479053 | 9.887479053 | 9.887479053 | 9.887479053 | 9.887479053 |
| GT2       | 9.759640768 | 9.259459201  | 9.649201249 | 9.841705378 | 9.810052082 | 8.606557194 | 9.457393123  | 8.800227787 | 9.280725448 | 9.669936993 | 9.303393471 | 9.280812175 | 9.267136584  | 9.403030691 | 9.214160823 | 9.609258165 | 9.641081514 | 9.374803311 |
| SFSP1     | 9.659876207 | 8.800853397  | 9.185095582 | 9.354356036 | 9.382374438 | 9.285510338 | 9.447179489  | 9.711924066 | 9.308558883 | 9.576484198 | 9.304540078 | 9.258129175 | 9.998520175  | 9.111780008 | 9.902270443 | 8.700276121 | 9.399986894 | 9.518465886 |
| CFP7      | 9.692133687 | 9.43124268   | 9.855211741 | 9.783786251 | 9.66126685  | 9.585617781 | 9.071898087  | 9.048959957 | 9.167166057 | 9.216371803 | 9.651304625 | 9.529242608 | 9.135105933  | 9.652624008 | 9.293268264 | 9.511448965 | 9.313746109 | 9.596373736 |
| SNR       | 9.493145686 | 9.748252238  | 9.635248676 | 9.635248676 | 9.635248676 | 9.635248676 | 9.635248676  | 9.635248676 | 9.635248676 | 9.635248676 | 9.635248676 | 9.635248676 | 9.635248676  | 9.635248676 | 9.635248676 | 9.635248676 | 9.635248676 | 9.635248676 |
| MTERF4    | 9.547949686 | 9.846574908  | 9.053486015 | 9.072619027 | 9.725269862 | 9.51032729  | 9.477338249  | 9.327349596 | 9.373224339 | 9.060684248 | 9.402487376 | 9.297949131 | 9.797398352  | 8.863767978 | 9.329357727 | 9.293064211 | 9.878055152 | 9.299369772 |
| MRP35     | 9.878159064 | 9.661864574  | 9.661864574 | 9.661864574 | 9.661864574 | 9.661864574 | 9.661864574  | 9.661864574 | 9.661864574 | 9.661864574 | 9.661864574 | 9.661864574 | 9.661864574  | 9.661864574 | 9.661864574 | 9.661864574 | 9.661864574 | 9.661864574 |
| CLPTM1    | 9.348188619 | 9.533996332  | 9.592818498 | 9.592818498 | 9.592818498 | 9.592818498 | 9.592818498  | 9.592818498 | 9.592818498 | 9.592818498 | 9.592818498 | 9.592818498 | 9.592818498  | 9.592818498 | 9.592818498 | 9.592818498 | 9.592818498 | 9.592818498 |
| ARRC1     | 9.462726788 | 9.493983471  | 9.493983471 | 9.493983471 | 9.493983471 | 9.493983471 | 9.493983471  | 9.493983471 | 9.493983471 | 9.493983471 | 9.493983471 | 9.493983471 | 9.493983471  | 9.493983471 | 9.493983471 | 9.493983471 | 9.493983471 | 9.493983471 |
| GOLP18    | 9.800493516 | 8.999311025  | 9.293157678 | 9.061467247 | 9.58830738  | 9.903212856 | 9.403734397  | 9.164061676 | 9.631420278 | 9.608464518 | 9.067796749 | 9.82896013  | 8.65368835   | 9.68785896  | 9.062278693 | 9.026447593 | 9.462559233 | 9.879615751 |
| HIKSH     | 9.37441452  | 9.194795711  | 9.696610592 | 9.194795711 | 9.194795711 | 9.194795711 | 9.194795711  | 9.194795711 | 9.194795711 | 9.194795711 | 9.194795711 | 9.194795711 | 9.194795711  | 9.194795711 | 9.194795711 | 9.194795711 | 9.194795711 | 9.194795711 |
| UNOS      | 9.080615512 | 9.610546419  | 9.553990162 | 9.5790255   | 10.08138933 | 9.796881766 | 9.104605552  | 9.104605552 | 9.114774042 | 9.084688877 | 9.5400729   | 9.373009481 | 9.4735878181 | 9.374908506 | 8.915523403 | 9.039546197 | 9.347913358 | 9.255999999 |
| LINC00489 | 9.858001004 | 9.480275046  | 9.840134443 | 9.840134443 | 9.840134443 | 9.840134443 | 9.840134443  | 9.840134443 | 9.840134443 | 9.840134443 | 9.840134443 | 9.840134443 | 9.840134443  | 9.840134443 | 9.840134443 | 9.840134443 | 9.840134443 | 9.840134443 |
| ZBT10     | 9.147192685 | 8.740550706  | 9.583148474 | 9.602215516 | 9.019265022 | 9.840170358 | 9.132927343  | 9.374357348 | 9.348306725 | 9.513427495 | 9.199245336 | 8.665459816 | 10.26082349  | 9.353681265 | 9.344305894 | 9.10478579  | 9.128276774 | 9.128276774 |
| BRD4      | 9.198236615 | 9.050418344  | 9.11594878  | 9.55569073  | 9.048283004 | 9.435310536 | 9.1480909318 | 9.336595417 | 9.480909318 | 9.460558815 | 9.579918145 | 8.840676791 | 9.422227911  | 8.894607104 | 9.72466286  | 9.502371918 | 9.244047649 | 9.57565035  |
| SPG20     | 9.329178739 | 9.255427506  | 9.716782949 | 9.586146692 | 9.582106454 | 8.877723867 | 9.510726472  | 8.626907962 | 9.379821287 | 9.984317061 | 9.480266978 | 9.310058987 | 9.316042986  | 8.813571475 | 9.72117089  | 9.391297074 | 9.362904598 | 9.607656929 |
| AMFR      | 9.45705807  | 9.955446611  | 9.955446611 | 9.955446611 | 9.955446611 | 9.955446611 | 9.955446611  | 9.955446611 | 9.955446611 | 9.955446611 | 9.955446611 | 9.955446611 | 9.955446611  | 9.955446611 | 9.955446611 | 9.955446611 | 9.955446611 | 9.955446611 |
| PFND1     | 9.755110237 | 10.155326378 | 9.920137283 | 9.920137283 |             |             |              |             |             |             |             |             |              |             |             |             |             |             |

|           |             |             |             |             |             |             |             |             |             |             |             |             |             |             |             |             |             |             |
|-----------|-------------|-------------|-------------|-------------|-------------|-------------|-------------|-------------|-------------|-------------|-------------|-------------|-------------|-------------|-------------|-------------|-------------|-------------|
| RBCK1     | 9.398420357 | 9.948611215 | 9.515430372 | 8.965980612 | 9.496511375 | 9.68627654  | 9.183692502 | 9.024995361 | 9.54283566  | 9.23268883  | 9.01819786  | 9.222292948 | 7.645853185 | 9.97108381  | 8.52775479  | 8.897046483 | 9.077296445 | 9.525300846 |
| GBAS      | 9.684063979 | 9.681550591 | 9.112296939 | 9.653811281 | 9.302535848 | 9.452370652 | 9.409725652 | 9.985971029 | 9.27207551  | 9.218780012 | 9.064545078 | 9.036915321 | 9.327776834 | 9.919802417 | 9.994868953 | 9.601652771 | 9.193573516 | 9.493576502 |
| TMEM418   | 9.435989989 | 9.644428359 | 9.969719717 | 9.51911133  | 9.31766016  | 9.132376158 | 9.368079291 | 9.130389968 | 9.234946152 | 9.309980211 | 9.368579185 | 9.604311678 | 9.074543438 | 9.810490279 | 9.445808564 | 9.807168487 | 9.074315513 | 9.547274142 |
| HACD3     | 9.527945212 | 9.258670244 | 8.853943991 | 9.724526096 | 9.632563334 | 9.270985002 | 9.20096675  | 9.122125634 | 9.612313639 | 9.425776773 | 9.355866212 | 9.719609445 | 8.582846741 | 9.742575479 | 9.183967869 | 9.170461194 | 9.214961203 | 9.586891078 |
| VPSG4     | 9.930847045 | 9.16486448  | 9.062322384 | 9.807693589 | 9.807693589 | 9.807693589 | 9.807693589 | 9.807693589 | 9.807693589 | 9.807693589 | 9.807693589 | 9.807693589 | 9.807693589 | 9.807693589 | 9.807693589 | 9.807693589 | 9.807693589 | 9.807693589 |
| TTIL      | 9.552566383 | 9.7727276   | 9.378034049 | 9.930643024 | 9.512374952 | 9.37352023  | 9.852047649 | 8.852047649 | 9.135363138 | 9.852047649 | 9.852047649 | 9.852047649 | 9.852047649 | 9.852047649 | 9.852047649 | 9.852047649 | 9.852047649 | 9.852047649 |
| HTRA2     | 9.888504607 | 9.86424654  | 9.498359629 | 9.217305362 | 9.89636605  | 9.618906322 | 9.587234426 | 8.891430471 | 9.529500341 | 9.12901173  | 9.505056094 | 9.351672473 | 9.100507514 | 9.057969991 | 8.834832892 | 9.27526274  | 9.065784478 | 9.195027071 |
| MAFF      | 9.907128137 | 9.189397336 | 7.863930329 | 9.396563598 | 9.67807652  | 9.33966697  | 9.33966697  | 9.33966697  | 9.33966697  | 9.33966697  | 9.33966697  | 9.33966697  | 9.33966697  | 9.33966697  | 9.33966697  | 9.33966697  | 9.33966697  | 9.33966697  |
| SMCIA     | 8.834493946 | 9.057055182 | 7.58406541  | 8.246523894 | 9.122625909 | 9.632361248 | 9.953025422 | 9.746114948 | 9.549970772 | 9.264035057 | 9.749972698 | 9.6013562   | 8.114095658 | 9.13876598  | 9.13067017  | 9.17202143  | 9.294904884 | 9.288333333 |
| ODF38     | 9.123223633 | 9.165632526 | 8.571150453 | 8.976324086 | 9.225000389 | 9.303410426 | 9.225000389 | 9.403434855 | 9.127999411 | 9.109747615 | 9.547759553 | 9.41377675  | 9.543219467 | 9.879688087 | 9.70166111  | 9.895948626 | 9.399294717 | 9.399294717 |
| HUA-DMA   | 8.850673863 | 8.522763266 | 9.090043351 | 8.669306683 | 9.306386966 | 9.319278405 | 9.027784405 | 9.769031548 | 9.32231853  | 9.139482447 | 9.453813463 | 9.351875001 | 9.50430781  | 9.740818399 | 9.029445678 | 9.507813989 | 9.91770959  | 9.91770959  |
| ATOK1     | 9.446366634 | 9.568617487 | 9.995571484 | 9.118356484 | 9.995571484 | 9.995571484 | 9.995571484 | 9.995571484 | 9.995571484 | 9.995571484 | 9.995571484 | 9.995571484 | 9.995571484 | 9.995571484 | 9.995571484 | 9.995571484 | 9.995571484 | 9.995571484 |
| SUD3      | 9.133140635 | 9.13740635  | 9.938076471 | 9.631804635 | 9.782170148 | 9.373582023 | 9.104867037 | 9.361803667 | 9.361803667 | 9.361803667 | 9.361803667 | 9.361803667 | 9.361803667 | 9.361803667 | 9.361803667 | 9.361803667 | 9.361803667 | 9.361803667 |
| MRPL3     | 9.474070281 | 9.590898889 | 9.61166535  | 9.374097589 | 9.538902235 | 9.756988665 | 9.416934552 | 8.684174321 | 9.915354153 | 8.85552231  | 9.879238927 | 9.523155272 | 9.55661089  | 9.143255328 | 8.830629363 | 8.851399885 | 9.20108906  | 9.242770193 |
| GOSR1     | 9.655880002 | 9.208730812 | 9.287720041 | 9.125678734 | 9.383051766 | 9.60645887  | 9.874041331 | 9.027150985 | 9.46216935  | 9.30403664  | 8.989544485 | 9.095119641 | 9.101846787 | 9.209127271 | 9.656497185 | 9.311402509 | 9.744101848 | 9.744101848 |
| WHRN      | 9.019190424 | 9.593857162 | 9.195431271 | 9.366728668 | 8.658609393 | 9.406828914 | 9.415235789 | 9.13601952  | 9.79674854  | 9.398043263 | 8.886211047 | 8.531384622 | 9.800844144 | 9.638689829 | 9.677638527 | 9.245728968 | 9.11064263  | 9.109445444 |
| SIPA1     | 9.404636334 | 8.557017959 | 9.00928356  | 9.18810818  | 9.473446789 | 9.989836962 | 9.399562304 | 9.134064675 | 9.39562304  | 9.134064675 | 9.296360201 | 9.266433613 | 9.103318589 | 9.50120351  | 9.343281224 | 9.90061471  | 9.096857127 | 9.811527667 |
| PHTF1     | 9.191288455 | 9.387360646 | 9.970871386 | 9.387360646 | 9.57613993  | 9.976205933 | 9.976205933 | 9.976205933 | 9.976205933 | 9.976205933 | 9.976205933 | 9.976205933 | 9.976205933 | 9.976205933 | 9.976205933 | 9.976205933 | 9.976205933 | 9.976205933 |
| GOLG7     | 9.137810827 | 9.225043645 | 9.491412865 | 9.349434528 | 9.085949624 | 9.362331088 | 9.329428465 | 8.571470035 | 9.160713209 | 9.256780252 | 8.88402152  | 9.806002253 | 9.786647197 | 9.10017029  | 9.257617939 | 9.53033942  | 9.391556716 | 9.509449476 |
| ATB1      | 9.887517065 | 9.981235198 | 9.827038688 | 8.976779201 | 9.11221136  | 9.72821607  | 9.981628008 | 9.86267974  | 9.019973859 | 9.418017095 | 9.08370509  | 9.24815467  | 9.236139059 | 9.111781443 | 9.23910753  | 9.276417717 | 9.565264768 | 9.72989439  |
| DEWDA4    | 8.245172862 | 8.710737958 | 8.707073567 | 8.465940427 | 9.404774753 | 9.101205651 | 9.101205651 | 9.101205651 | 9.101205651 | 9.101205651 | 9.101205651 | 9.101205651 | 9.101205651 | 9.101205651 | 9.101205651 | 9.101205651 | 9.101205651 | 9.101205651 |
| ATAD1     | 9.123778418 | 9.48851971  | 9.48851971  | 9.57404102  | 8.803748156 | 9.474880034 | 9.476899441 | 9.328481122 | 9.274880034 | 9.328481122 | 9.57344618  | 9.583886838 | 8.826026514 | 9.480385761 | 9.157586421 | 9.351231818 | 9.08432833  | 9.96807006  |
| FAF1      | 9.951889397 | 9.58825536  | 9.705104956 | 9.933106953 | 9.536685408 | 9.886138543 | 9.510522625 | 9.996080645 | 9.343340265 | 9.96352571  | 9.17581298  | 9.590567058 | 8.887959103 | 9.46049032  | 9.26222423  | 9.131716257 | 9.278732618 | 9.32784804  |
| CRYG3     | 9.771941829 | 8.446267755 | 8.954863483 | 8.446267755 | 9.76145953  | 9.68113137  | 9.40000142  | 9.638739351 | 9.514298706 | 9.672467531 | 9.054808567 | 9.59923441  | 9.69928074  | 8.73188576  | 9.306805133 | 9.29287461  | 8.863596834 | 9.60852276  |
| ZMYM2     | 8.445565344 | 9.264392098 | 8.647582296 | 9.42796411  | 9.282740621 | 9.635848264 | 9.60662964  | 9.357455224 | 9.515688156 | 9.515688156 | 9.317702791 | 9.220372875 | 9.543934506 | 9.54939233  | 9.906695957 | 9.403426863 | 9.554326836 | 9.93712221  |
| TRAPPCC5A | 9.621555492 | 9.768317272 | 9.88050226  | 9.508259703 | 9.547625785 | 9.654994698 | 9.946185025 | 8.608217856 | 9.257268036 | 9.958402288 | 9.984512869 | 9.737413472 | 9.5144709   | 9.338894468 | 8.612967774 | 9.192498747 | 9.192498747 | 9.192498747 |
| GMPP2     | 9.724056498 | 8.470594399 | 9.060014993 | 8.975423342 | 9.386666963 | 9.97598814  | 9.902683906 | 9.386183427 | 9.425697385 | 9.200795385 | 9.916145482 | 9.49547215  | 9.41119955  | 8.731950132 | 9.542150871 | 9.208860754 | 9.167400462 | 8.97861327  |
| SLC22A2   | 9.327562862 | 9.593489389 | 9.724495219 | 9.256965312 | 9.256965312 | 9.256965312 | 9.256965312 | 9.256965312 | 9.256965312 | 9.256965312 | 9.256965312 | 9.256965312 | 9.256965312 | 9.256965312 | 9.256965312 | 9.256965312 | 9.256965312 | 9.256965312 |
| PRX5      | 10.2178558  | 9.87853625  | 10.0408085  | 9.90967816  | 9.475397623 | 10.0458716  | 9.78548739  | 9.90383722  | 9.928693093 | 9.90383722  | 9.909891350 | 9.97918783  | 8.408659832 | 9.167859381 | 9.129345701 | 9.193696634 | 9.049062725 | 8.69561523  |
| MRP5      | 9.523523602 | 9.645829586 | 10.09372422 | 9.107131338 | 9.673968786 | 8.860011483 | 8.653600041 | 9.285152173 | 9.305141652 | 8.86523042  | 9.285027128 | 9.598466196 | 9.76238117  | 9.817412164 | 8.796237059 | 9.252011048 | 9.139698932 | 9.26443534  |
| GTBP6     | 9.737784239 | 9.644924339 | 9.644924339 | 9.891361339 | 9.921524912 | 9.57328387  | 9.139215219 | 9.139215219 | 9.139215219 | 9.139215219 | 9.139215219 | 9.139215219 | 9.139215219 | 9.139215219 | 9.139215219 | 9.139215219 | 9.139215219 | 9.139215219 |
| MEAF6     | 9.073633902 | 9.10732018  | 9.466645599 | 9.775188462 | 9.08223351  | 9.633122804 | 8.426488374 | 9.049115538 | 9.67833082  | 9.11138855  | 9.27899807  | 9.310982928 | 9.591475701 | 9.155612508 | 8.775156714 | 9.43399271  | 8.817271918 | 9.170818778 |
| PRPF38A   | 9.72834962  | 9.42444914  | 9.235848636 | 9.076617254 | 9.42444914  | 9.235848636 | 9.599264736 | 8.82786137  | 9.216535186 | 8.847636334 | 9.42769194  | 9.650094616 | 9.404207629 | 8.55462305  | 9.187171402 | 9.352110375 | 9.397170976 | 9.417253196 |
| CLTA      | 9.6052016   | 10.13819603 | 9.890424779 | 9.415493427 | 9.785521551 | 9.167400075 | 9.084564635 | 9.206892572 | 9.387007942 | 9.387007942 | 9.380754619 | 9.692462667 | 9.93373372  | 9.272157301 | 9.02477497  | 9.17627496  | 9.404808153 | 9.135312602 |
| SLC44A    | 9.341152327 | 9.467690909 | 9.782040179 | 9.789587371 | 9.277864704 | 9.10248677  | 9.308649268 | 9.03624658  | 9.150536128 | 9.321328987 | 9.52151052  | 8.87234224  | 9.235150804 | 9.322105972 | 9.165480210 | 9.165480210 | 9.165480210 | 9.165480210 |
| SLC3C1    | 9.48976484  | 9.40613758  | 9.846012688 | 9.75542865  | 9.846012688 | 9.846012688 | 9.846012688 | 9.846012688 | 9.846012688 | 9.846012688 | 9.846012688 | 9.846012688 | 9.846012688 | 9.846012688 | 9.846012688 | 9.846012688 | 9.846012688 | 9.846012688 |
| COX14     | 9.53208408  | 9.957091302 | 9.731495278 | 9.416804579 | 9.19325906  | 9.409457527 | 9.558389875 | 9.79352559  | 9.930641459 | 9.905840213 | 9.155648667 | 9.464428642 | 8.701820587 | 9.91501285  | 8.654939002 | 9.076376347 | 8.850576132 | 9.174666328 |
| MRPL18    | 9.280217219 | 9.567192809 | 9.216117425 | 9.376566035 | 9.623918027 | 9.623972192 | 9.205869599 | 9.367980874 | 9.284029605 | 9.415352739 | 9.299377729 | 9.426541765 | 9.963426321 | 9.046642921 | 9.259446308 | 9.069820114 | 9.059898875 | 9.146566911 |
| RVPB      | 9.515268264 | 7.94513041  | 9.317027679 | 9.401220213 | 8.834718053 | 9.106663947 | 9.265215703 | 9.387068557 | 9.410375981 | 8.857151779 | 9.680013607 | 9.176144479 | 9.657110438 | 9.222794916 | 9.333083034 | 9.48908066  | 9.061334064 | 8.918651504 |
| ACP2      | 9.754526264 | 9.316558582 | 9.797583316 | 8.873661754 | 9.357224765 | 10.32591889 | 9.04144766  | 9.867350207 | 9.218305088 | 9.218305088 | 9.878618542 | 8.022526292 | 9.895665018 | 9.395047367 | 9.045288661 | 9.38284378  | 9.38284378  | 9.38284378  |
| NCAHP2    | 9.226518658 | 9.478786073 | 9.551252929 | 9.275220244 | 9.880677788 | 9.795861451 | 9.336753883 | 9.613959522 | 9.889681645 | 9.156493485 | 9.235732115 | 9.033554393 | 9.603249657 | 9.854067504 | 9.518884024 | 9.222680961 | 9.308275764 | 8.931780804 |
| MTFP1     | 9.476179255 | 8.99526386  | 8.70763126  | 9.265600426 | 9.869770389 | 9.934521254 | 9.596306365 | 8.887167163 | 9.60999260  |             |             |             |             |             |             |             |             |             |

|         |             |              |             |             |             |             |             |             |             |             |             |             |             |             |             |             |              |             |
|---------|-------------|--------------|-------------|-------------|-------------|-------------|-------------|-------------|-------------|-------------|-------------|-------------|-------------|-------------|-------------|-------------|--------------|-------------|
| ZWF6    | 9.003015472 | 9.373644212  | 9.118604432 | 8.70798387  | 9.334241514 | 9.319904988 | 9.259474843 | 9.506640018 | 9.087791057 | 9.703096611 | 9.254228985 | 9.275758709 | 9.897010254 | 9.350421721 | 9.809541116 | 9.071618427 | 9.482482791  | 9.103399044 |
| ADD3    | 8.791781281 | 8.230664907  | 9.741273264 | 9.667635286 | 9.175535816 | 8.777555166 | 9.108983444 | 8.994476255 | 9.167686411 | 9.488850715 | 9.359016048 | 9.108385904 | 9.413128882 | 9.50196622  | 9.906003852 | 8.95987311  | 9.497351315  | 9.431833698 |
| BRD8    | 9.122107726 | 9.625197973  | 8.578254994 | 9.126566957 | 9.249618688 | 8.179179706 | 8.82779964  | 9.284577453 | 8.810663772 | 9.309112813 | 9.893475493 | 9.20180920  | 9.17611376  | 9.112136686 | 9.63183147  | 9.431826315 | 9.80261376   | 9.318823618 |
| ABHD17A | 9.274484378 | 9.300435023  | 8.895113386 | 8.598748947 | 9.39474211  | 9.378404205 | 9.270926146 | 9.024580294 | 9.445773907 | 9.031224755 | 9.488539223 | 9.347057228 | 9.261738253 | 9.634350785 | 8.429834916 | 9.085144406 | 9.014628029  | 8.999029523 |
| TEEN1   | 9.345084728 | 9.345084728  | 9.345084728 | 9.345084728 | 9.345084728 | 9.345084728 | 9.345084728 | 9.345084728 | 9.345084728 | 9.345084728 | 9.345084728 | 9.345084728 | 9.345084728 | 9.345084728 | 9.345084728 | 9.345084728 | 9.345084728  | 9.345084728 |
| RMND3   | 9.878967091 | 9.878967091  | 9.878967091 | 9.878967091 | 9.878967091 | 9.878967091 | 9.878967091 | 9.878967091 | 9.878967091 | 9.878967091 | 9.878967091 | 9.878967091 | 9.878967091 | 9.878967091 | 9.878967091 | 9.878967091 | 9.878967091  | 9.878967091 |
| ELP2    | 8.851242606 | 9.1088661573 | 8.659367294 | 9.270323248 | 9.270323248 | 9.792506095 | 8.598208874 | 9.308391985 | 9.117208309 | 9.373035298 | 9.046163981 | 9.259974147 | 8.413839264 | 9.761020425 | 9.281883963 | 9.300467819 | 9.535862893  | 9.32488335  |
| GEMIN7  | 9.47311926  | 9.187607628  | 8.860112044 | 9.187607628 | 9.277391081 | 9.277391081 | 9.557162514 | 8.780703058 | 8.808830086 | 9.986210747 | 9.831554411 | 9.578624903 | 9.774094658 | 9.253955338 | 8.521242106 | 9.766984984 | 8.295983694  | 8.886541783 |
| DNAJ3   | 9.936832996 | 9.897792127  | 9.127388137 | 9.228727412 | 9.558177263 | 8.332477615 | 9.897014449 | 9.30049216  | 9.134652167 | 9.485164638 | 9.050682011 | 9.512943865 | 9.207142682 | 9.790644057 | 9.221295284 | 9.186274049 | 9.478007575  | 9.29691478  |
| RNF7    | 9.259205729 | 9.844071903  | 9.844071903 | 9.844071903 | 9.844071903 | 9.844071903 | 9.844071903 | 9.844071903 | 9.844071903 | 9.844071903 | 9.844071903 | 9.844071903 | 9.844071903 | 9.844071903 | 9.844071903 | 9.844071903 | 9.844071903  | 9.844071903 |
| POZL2   | 9.245224294 | 9.317652487  | 9.912557574 | 9.890545281 | 9.514895999 | 9.192083866 | 9.494833701 | 9.514895999 | 9.514895999 | 9.330203984 | 9.470170486 | 8.970015725 | 9.533883866 | 8.932597849 | 9.343094629 | 9.819778173 | 9.521039236  | 9.216372549 |
| DKC1    | 9.183512059 | 9.659595419  | 9.299276483 | 9.428792823 | 9.314643491 | 9.514643491 | 9.580651706 | 9.5058751   | 9.29656762  | 9.511538031 | 9.215448898 | 9.016380167 | 9.943694981 | 9.102812628 | 9.20609588  | 9.226757071 | 9.154353385  | 9.300086669 |
| HDP     | 9.24662176  | 9.603246201  | 8.619149562 | 9.97660549  | 9.913452806 | 9.901320968 | 9.16859599  | 9.027337868 | 9.463129999 | 9.84674553  | 9.851719837 | 9.851719837 | 9.851719837 | 9.502790006 | 9.365889378 | 9.862438748 | 9.278760056  |             |
| LWP1    | 9.802958861 | 9.48695407   | 8.83858431  | 9.655123951 | 9.831530409 | 9.259423428 | 8.31097903  | 9.264492326 | 9.311293555 | 9.283950272 | 9.100939356 | 9.28235098  | 9.514267742 | 9.04865799  | 9.07081547  | 9.164942629 | 9.831985519  | 9.58719185  |
| CON2    | 9.929702801 | 9.28654997   | 8.888940637 | 9.666271238 | 8.205723902 | 8.008534427 | 8.744658215 | 9.297171836 | 8.907546416 | 9.464235044 | 9.169516657 | 9.449889204 | 8.697117976 | 8.802581689 | 9.763214199 | 9.175709141 | 9.571926037  | 9.733031034 |
| ACC2    | 9.299686794 | 9.975792341  | 8.074932468 | 9.156805233 | 8.88872285  | 9.220639494 | 9.20740562  | 9.636337549 | 9.172975607 | 9.66215308  | 9.169516657 | 9.449889204 | 8.697117976 | 8.802581689 | 9.763214199 | 9.175709141 | 9.571926037  | 9.733031034 |
| RABGEF1 | 8.378230375 | 9.554575042  | 8.948055302 | 9.017314002 | 9.433992285 | 9.49761614  | 8.804274614 | 9.47028172  | 9.862984966 | 9.621401092 | 9.488831727 | 9.29469102  | 9.043863456 | 9.049711625 | 9.347257162 | 9.566783022 | 9.139112469  | 9.652184232 |
| ABT1    | 9.377017585 | 8.956035036  | 9.260833341 | 9.103596613 | 9.576677378 | 9.468887184 | 9.453801339 | 8.765703041 | 8.846795577 | 9.87048595  | 9.374485899 | 9.103695714 | 9.395807683 | 9.256925478 | 9.119428314 | 9.140820455 | 9.031665733  | 9.408066674 |
| CNSK2A2 | 9.602781292 | 9.11350364   | 9.204616446 | 9.206738319 | 9.777357533 | 9.803729614 | 9.89569141  | 9.209697598 | 9.936750983 | 8.855371017 | 9.581870871 | 9.30020363  | 9.261662622 | 9.255701588 | 9.819453236 | 9.268989088 |              |             |
| MTG1    | 9.139898684 | 8.935740814  | 9.058576764 | 9.565217434 | 8.883071488 | 9.248173942 | 9.79727888  | 9.812544531 | 9.23239908  | 8.851371759 | 8.826262304 | 9.85497375  | 9.680801022 | 9.914109652 | 9.190642142 | 8.476341019 | 9.286026545  |             |
| FR1     | 9.263585864 | 9.015126109  | 9.353491354 | 9.590444933 | 9.449487456 | 9.410481598 | 9.189074185 | 9.148949005 | 9.189974511 | 9.118572313 | 9.578655495 | 9.252449218 | 9.545640029 | 9.847054458 | 9.435416549 | 9.3414423   | 9.102751911  |             |
| PAIC3   | 8.43949459  | 9.12010955   | 9.627408014 | 8.820883125 | 9.89423737  | 9.465932504 | 8.714108959 | 9.82021014  | 9.463555353 | 9.862362527 | 9.215374069 | 9.33362401  | 9.257093977 | 9.258014939 | 9.06031771  | 9.307398698 | 9.077933784  | 9.933688314 |
| CYSTM1  | 9.1283952   | 9.375670626  | 8.837191851 | 9.329252556 | 9.095982930 | 9.432573792 | 9.470420078 | 9.185470932 | 9.45158308  | 9.911910563 | 8.829318869 | 9.954820079 | 9.877390765 | 9.546231713 | 9.37680771  | 9.134425040 | 8.964826538  | 9.107997797 |
| INTS1   | 9.62348114  | 9.17823301   | 9.273541844 | 9.51569897  | 9.19016596  | 9.424526342 | 9.142070686 | 9.464794286 | 9.15849441  | 9.238414572 | 9.395401159 | 9.99009119  | 9.5394264   | 9.225872147 | 8.671847301 | 9.276058216 | 9.8763872915 |             |
| GF3C3   | 9.27585296  | 8.96712308   | 9.562318191 | 9.237789961 | 8.318803804 | 9.62533827  | 9.11535039  | 9.968939126 | 9.15362423  | 9.027377364 | 9.545169476 | 9.444105853 | 9.465915323 | 9.215862197 | 9.98274901  | 9.30266301  | 9.243529792  |             |
| SLAIN2  | 9.529516515 | 8.437747824  | 8.523663759 | 9.483818977 | 9.327112796 | 9.507663319 | 9.463027604 | 9.381789419 | 9.463027604 | 9.381789419 | 9.389437466 | 8.873146704 | 9.291464578 | 9.946196713 | 9.290932683 | 9.550273877 | 9.22265378   | 9.158990974 |
| PPCD    | 9.806662088 | 9.029810393  | 9.312203181 | 9.69641448  | 9.677813034 | 9.421678752 | 9.20118503  | 9.079281959 | 9.016549409 | 8.83261351  | 8.922214964 | 9.574914315 | 9.684641373 | 9.72938209  | 9.189995735 | 9.336488555 | 8.850012503  | 9.07473889  |
| UR1A    | 9.421501807 | 9.042367096  | 9.042367096 | 9.042367096 | 9.042367096 | 9.042367096 | 9.042367096 | 9.042367096 | 9.042367096 | 9.042367096 | 9.042367096 | 9.042367096 | 9.042367096 | 9.042367096 | 9.042367096 | 9.042367096 | 9.042367096  | 9.042367096 |
| UR1B    | 9.421501807 | 9.042367096  | 9.042367096 | 9.042367096 | 9.042367096 | 9.042367096 | 9.042367096 | 9.042367096 | 9.042367096 | 9.042367096 | 9.042367096 | 9.042367096 | 9.042367096 | 9.042367096 | 9.042367096 | 9.042367096 | 9.042367096  | 9.042367096 |
| ZBT4    | 9.12252696  | 9.415938178  | 8.925200359 | 9.387698155 | 8.5326785   | 8.78246465  | 9.800721015 | 9.849657809 | 9.606221783 | 9.932963664 | 9.108701439 | 9.951237886 | 9.536887475 | 8.87717398  | 9.743212017 | 9.614007881 | 9.0266046    | 9.663848393 |
| ARL4    | 9.583491248 | 9.612663224  | 8.820484974 | 9.01107701  | 9.01258293  | 9.486206674 | 8.800329571 | 9.03394969  | 8.448364668 | 9.483346021 | 9.266307873 | 9.417506184 | 9.745483061 | 8.500252868 | 9.604999611 | 8.598539897 | 9.745342048  |             |
| POG2    | 9.017636901 | 8.675689087  | 8.608665935 | 9.884354119 | 9.260583661 | 9.938744511 | 8.171311584 | 9.551821816 | 9.057579603 | 9.837400624 | 9.440551517 | 9.248966333 | 9.12499369  | 9.052532805 | 9.83905051  | 8.877644968 | 9.732904087  | 9.86082694  |
| ANKR03B | 8.986773079 | 8.627204914  | 8.990862614 | 8.627204914 | 8.990862614 | 8.627204914 | 8.990862614 | 8.627204914 | 8.990862614 | 8.627204914 | 8.990862614 | 8.627204914 | 8.990862614 | 8.627204914 | 8.990862614 | 8.627204914 | 8.990862614  | 8.627204914 |
| CAT     | 9.508218066 | 8.90578959   | 9.924598076 | 9.900588704 | 9.983792573 | 7.938138156 | 9.409554549 | 9.162274812 | 9.278380802 | 8.871914409 | 8.76405038  | 8.615891302 | 9.803484693 | 9.81161135  | 9.163270053 | 9.230424236 | 8.79614839   | 9.102075765 |
| PDG     | 9.357890373 | 8.810826448  | 9.126027396 | 9.38959553  | 9.899578349 | 9.379078349 | 9.548959516 | 9.257364336 | 9.24017374  | 9.29632349  | 9.101256037 | 9.159466551 | 9.399350063 | 9.83772361  | 9.206528988 | 9.83772361  | 9.206528988  | 9.83772361  |
| TR1     | 9.162358418 | 9.137590156  | 9.137590156 | 9.137590156 | 9.137590156 | 9.137590156 | 9.137590156 | 9.137590156 | 9.137590156 | 9.137590156 | 9.137590156 | 9.137590156 | 9.137590156 | 9.137590156 | 9.137590156 | 9.137590156 | 9.137590156  | 9.137590156 |
| MEM87B  | 9.304394507 | 8.74179802   | 9.500209959 | 9.10789251  | 9.156295854 | 9.365474103 | 9.408551666 | 9.039260928 | 9.264015233 | 9.19563073  | 9.276625513 | 9.837847035 | 9.213929134 | 9.842605346 | 9.324670314 | 9.070844875 | 9.23944613   | 9.035164445 |
| ING3    | 9.594300007 | 9.399853272  | 9.311490428 | 9.3116101   | 9.187018482 | 9.187018482 | 9.408527186 | 9.315691    | 9.265670129 | 9.820746703 | 9.949736219 | 9.107174431 | 9.548086419 | 9.761154325 | 9.230589963 | 9.238117466 | 9.18305261   | 9.10212896  |
| EMC1    | 8.276422056 | 9.936900571  | 9.479701767 | 9.579689837 | 9.236047766 | 9.897021302 | 9.945506807 | 9.492212954 | 9.893537209 | 9.375722321 | 9.267654112 | 9.619438217 | 9.534648254 | 8.666608184 | 9.732893094 | 9.190151336 | 9.119172398  | 9.143236836 |
| DUT     | 9.389551993 | 9.516267766  | 9.49640943  | 9.516267766 | 9.49640943  | 9.516267766 | 9.49640943  | 9.516267766 | 9.49640943  | 9.516267766 | 9.49640943  | 9.516267766 | 9.49640943  | 9.516267766 | 9.49640943  | 9.516267766 | 9.49640943   | 9.516267766 |
| RRGAP1  | 9.017395513 | 9.04543244   | 8.723315463 | 9.398925083 | 8.678351467 | 9.848375355 | 9.66780363  | 9.6374097   | 9.301866726 | 9.388902051 | 9.729944248 | 9.938526517 | 7.962018724 | 9.380232545 | 9.932120857 | 9.22341861  | 9.914794927  | 9.141235277 |
| FN1     | 8.83429906  | 9.05617037   | 8.673200466 | 9.193388371 | 9.059911074 | 9.184753752 | 9.220212151 | 9.063605761 | 9.34353706  | 9.41052009  | 9.116154938 | 9.244058254 | 9.34426976  | 8.57139714  |             |             |              |             |



|          |             |              |             |              |             |             |             |             |             |             |             |              |             |             |             |             |             |             |
|----------|-------------|--------------|-------------|--------------|-------------|-------------|-------------|-------------|-------------|-------------|-------------|--------------|-------------|-------------|-------------|-------------|-------------|-------------|
| HHRNPL   | 8.86961753  | 8.765930769  | 9.051201535 | 9.269954102  | 8.473369106 | 8.971347133 | 8.772279308 | 9.703515627 | 9.123581499 | 9.494595886 | 9.251047017 | 8.508091927  | 9.322425627 | 9.425410931 | 9.714301552 | 9.470712881 | 9.644473242 | 8.927883744 |
| MCTS1    | 8.901918757 | 9.173612926  | 8.88918608  | 9.672605531  | 9.372104052 | 9.199914904 | 9.948269898 | 8.899714886 | 9.174069541 | 9.214327078 | 9.344354    | 9.952284112  | 9.66503529  | 9.363586688 | 8.8354853   | 9.34264435  | 9.23782387  | 9.043628002 |
| HLA-QD41 | 8.351833958 | 11.06760452  | 8.102485861 | 11.845137859 | 8.130717864 | 7.678216223 | 7.5966357   | 9.259680816 | 9.73441386  | 10.29674968 | 9.71820218  | 9.14552587   | 8.096832755 | 8.845272936 | 9.11395376  | 10.24504920 | 10.88468825 |             |
| LAMAS    | 8.756956654 | 8.89610957   | 9.143229917 | 8.741385377  | 9.204559802 | 8.582846721 | 9.544473304 | 9.227771838 | 9.168759004 | 9.229291778 | 9.14175726  | 9.225062645  | 9.36117314  | 8.618918429 | 9.233900387 | 9.245838382 | 9.73957765  | 8.923556642 |
| DIO      | 9.434730878 | 9.099658082  | 9.210228343 | 9.099658082  | 9.210228343 | 9.099658082 | 9.210228343 | 9.099658082 | 9.210228343 | 9.099658082 | 9.155639791 | 9.498761651  | 9.2341127   | 8.944436967 | 9.315730972 | 9.209466022 | 9.08170912  | 9.358406606 |
| PMERPA1  | 9.647574193 | 8.206542664  | 9.23931998  | 8.764542664  | 9.240658608 | 9.954290047 | 9.514580674 | 9.318580074 | 9.318580074 | 9.073230636 | 9.182128359 | 8.48321442   | 9.310516057 | 9.075743716 | 9.051495182 | 9.074615863 | 8.263376635 | 8.779146646 |
| ZNF64    | 8.9500565   | 8.85528778   | 8.839841479 | 9.504374083  | 9.471598675 | 9.442199698 | 8.434109693 | 9.203110027 | 9.860912047 | 9.237557004 | 9.209178818 | 9.11118028   | 8.303243104 | 9.024884743 | 9.078328765 | 9.536488256 | 9.1673957   | 8.747290767 |
| PKRPR1   | 9.217367449 | 9.397675558  | 9.033584248 | 9.573239085  | 8.865972965 | 9.324157953 | 9.172500094 | 9.241502243 | 9.160872809 | 9.196043299 | 9.014681591 | 9.200840672  | 8.277440027 | 9.171132668 | 8.975386969 | 9.330407291 | 9.579107526 | 8.891931503 |
| ERH      | 9.421445389 | 9.286554769  | 8.818232571 | 8.975177627  | 9.123081253 | 9.420458164 | 9.376625575 | 8.779698029 | 9.389933333 | 9.187515608 | 9.041026619 | 9.193078973  | 9.003639761 | 9.226669295 | 9.786440095 | 9.209307811 | 9.178783298 | 8.959279925 |
| SETD2    | 8.775284848 | 8.27379571   | 8.333741453 | 8.805648033  | 8.369078361 | 9.960287583 | 9.966031997 | 9.298583518 | 9.699727907 | 9.133422542 | 9.012559311 | 9.012768893  | 9.97311777  | 9.196530786 | 9.32200191  | 9.94429009  | 9.16233887  | 9.26580863  |
| FZD3     | 8.619164653 | 9.047317231  | 6.503684487 | 9.047317231  | 6.503684487 | 9.74877925  | 10.02827372 | 9.052746078 | 9.301277952 | 8.897080275 | 9.499967667 | 8.259187265  | 8.861500718 | 9.448440300 | 9.294159505 | 9.325005318 | 9.182365373 |             |
| NK1D2    | 8.97866665  | 9.295412607  | 8.51088953  | 9.216649101  | 8.154864814 | 8.061909936 | 8.01628311  | 9.642716574 | 9.37046459  | 9.261559038 | 9.147305999 | 8.021368122  | 9.401559323 | 9.388280101 | 9.616804004 | 9.800250821 | 9.09969103  | 8.949918671 |
| ECHD3    | 8.46815363  | 9.523494141  | 9.248833908 | 9.245435615  | 9.36643558  | 9.488038185 | 8.880346008 | 9.23322497  | 9.035565085 | 9.38317398  | 9.249907999 | 9.676033797  | 8.815527242 | 9.173636    | 9.15376048  | 8.668293867 |             |             |
| VFK3     | 9.44859109  | 9.113327232  | 9.414904197 | 9.33176923   | 9.20655644  | 9.418070671 | 9.981745605 | 9.980497154 | 9.396543635 | 9.049345448 | 9.99984818  | 9.433061467  | 9.21700218  | 9.516235831 | 9.097766116 | 8.82854865  | 9.145073002 | 9.408745865 |
| FAM9A9   | 9.148400099 | 9.479346516  | 9.297487083 | 9.297487083  | 9.297487083 | 9.297487083 | 9.297487083 | 9.297487083 | 9.297487083 | 9.297487083 | 9.434368928 | 9.550869346  | 9.192397916 | 8.474469707 | 9.264649106 | 9.41007276  | 9.16820572  | 9.408738366 |
| DXD41    | 9.407786919 | 10.07483386  | 8.953344284 | 9.656276725  | 9.93970387  | 9.615004009 | 9.114847847 | 9.393437319 | 9.818243618 | 9.228845026 | 9.135194926 | 9.502068699  | 9.102762895 | 9.726733089 | 9.382667478 | 9.092758272 | 9.098438528 | 8.995636846 |
| MS18BP1  | 9.130458816 | 9.435192412  | 9.132844863 | 9.34278201   | 9.198442356 | 9.205767612 | 9.597008383 | 9.20170531  | 9.32109435  | 9.568200719 | 9.178823033 | 6.884882169  | 9.157800702 | 9.175378695 | 9.25840777  | 9.372368888 | 8.757547653 |             |
| RABP1    | 9.510262153 | 8.150242153  | 9.193321906 | 8.069776009  | 9.120957933 | 8.839133472 | 9.153145569 | 9.226341941 | 9.16405377  | 9.486358345 | 8.373725498 | 10.11350203  | 9.62402692  | 9.159969649 | 9.508128799 | 9.088704009 | 9.302123416 |             |
| CMC2     | 9.025636157 | 9.141082153  | 9.141082153 | 9.141082153  | 9.141082153 | 8.675272265 | 9.422016459 | 9.017199821 | 9.422016459 | 9.405865258 | 9.174383903 | 9.230386996  | 9.618808154 | 9.449549699 | 8.686534506 | 8.878465571 | 9.183160639 | 8.974474913 |
| KF21A    | 9.518030794 | 9.216039546  | 8.280730123 | 9.177369866  | 9.060903283 | 9.48317614  | 8.011248333 | 9.105890071 | 9.368314614 | 9.195924641 | 9.187346021 | 9.251765231  | 9.102901659 | 9.170081002 | 9.328241109 | 8.87369015  | 8.96065505  | 8.656501791 |
| NPE4     | 8.937727967 | 8.756956648  | 9.103938002 | 9.657638242  | 9.657638242 | 9.657638242 | 9.657638242 | 9.657638242 | 9.657638242 | 9.657638242 | 9.15475735  | 9.58853467   | 9.221518257 | 9.565506567 | 9.024029528 | 8.75324254  | 9.13550227  | 8.34526565  |
| MIEN1    | 8.970729067 | 9.66410391   | 9.389183322 | 8.90207489   | 9.138717341 | 9.026038954 | 9.861745501 | 9.206038954 | 8.995073989 | 9.18257811  | 9.39031474  | 9.276502809  | 8.688240183 | 8.829089636 | 8.819338505 | 9.08795579  | 9.90757597  |             |
| CST3     | 8.722261309 | 9.920359906  | 9.659703157 | 9.258350351  | 9.26755156  | 7.85486146  | 9.295434345 | 8.892819147 | 9.400881857 | 9.25323584  | 9.173478046 | 8.653053502  | 9.577075786 | 9.108151647 | 9.034889283 | 8.637493964 | 9.10257427  | 9.183139935 |
| SS5A     | 9.034671619 | 9.594953758  | 9.277176626 | 9.744801623  | 9.694543163 | 9.316720069 | 9.963161697 | 8.961316797 | 8.654087215 | 9.74538577  | 9.570196195 | 9.10691266   | 9.521390367 | 9.681206232 | 8.692872322 | 8.776537862 | 8.907900029 | 9.539628952 |
| NRPB3    | 9.488777729 | 9.684101664  | 9.158061092 | 9.961073253  | 9.859400369 | 8.406438326 | 8.850239    | 9.961073253 | 8.917469066 | 10.5326702  | 8.869390527 | 8.641154538  | 9.197655115 | 9.419114482 | 10.0259397  | 9.615660811 | 10.84275646 | 9.942779307 |
| MLP33    | 9.189971991 | 10.019380101 | 9.483762458 | 9.22737362   | 8.716571159 | 8.880953129 | 9.28234157  | 7.838572983 | 9.28234157  | 7.838572983 | 9.173943471 | 9.934511247  | 9.368102686 | 9.893955849 | 8.78560595  | 8.974923912 | 7.848459146 | 9.587729707 |
| UBAP1    | 8.027993538 | 8.224449027  | 9.39391251  | 8.491652258  | 9.229877011 | 9.059601774 | 9.716888133 | 8.791512424 | 9.31656918  | 8.910281267 | 9.25256558  | 8.92996024   | 9.250033664 | 9.311232961 | 8.758246273 | 9.319412829 | 9.738514449 | 9.339289952 |
| TRP23    | 9.29166395  | 9.798481365  | 9.112857435 | 9.126074851  | 9.454030397 | 9.126074851 | 9.454030397 | 9.126074851 | 9.454030397 | 9.126074851 | 9.126074851 | 9.126074851  | 9.126074851 | 9.126074851 | 9.126074851 | 9.126074851 | 9.126074851 | 9.126074851 |
| HERPUD2  | 8.93411578  | 8.925149007  | 9.369401857 | 9.605479525  | 9.369401857 | 9.369401857 | 9.369401857 | 9.369401857 | 9.369401857 | 9.369401857 | 9.369401857 | 9.369401857  | 9.369401857 | 9.369401857 | 9.369401857 | 9.369401857 | 9.369401857 | 9.369401857 |
| MEF2A    | 9.385411745 | 9.899326041  | 8.691841331 | 9.056920905  | 8.425027967 | 9.053206835 | 8.93553198  | 9.540690762 | 9.131649297 | 9.448276016 | 9.36714582  | 9.218433378  | 9.690820623 | 8.797479278 | 8.994075835 | 8.8549507   | 9.460956070 | 9.098614589 |
| TMM2M42  | 8.986914266 | 9.462923603  | 9.047584035 | 9.610231882  | 9.801679096 | 9.097855138 | 9.328378791 | 8.435309078 | 9.097855138 | 9.468683632 | 9.102845162 | 10.289776218 | 9.660037558 | 10.59550541 | 8.85091849  | 9.183029098 | 8.831061218 | 9.290317068 |
| LAS1L    | 9.571623764 | 10.15813917  | 9.307921507 | 9.760076525  | 9.0094365   | 9.303567193 | 8.327271717 | 9.90889792  | 9.352193703 | 6.899318514 | 9.021773425 | 9.506518167  | 7.830824727 | 9.926817667 | 7.844090866 | 9.214669042 | 8.94336695  | 9.130717495 |
| DVYCN12L | 9.067137889 | 9.907300609  | 8.662116212 | 9.554791671  | 7.5792812   | 9.011387152 | 9.239362765 | 9.681007438 | 9.033375978 | 9.33692506  | 9.228410168 | 9.130336275  | 9.797855517 | 9.855327507 | 9.899117021 | 9.2581757   | 9.402848356 |             |
| ANGEL1   | 9.094414146 | 8.467395364  | 9.159136315 | 8.506959683  | 9.184761076 | 8.652179489 | 8.736087141 | 9.149872991 | 9.217353784 | 9.707494774 | 9.662041156 | 9.680078729  | 9.907438047 | 9.381158684 | 9.646270091 | 9.415866683 | 9.316473369 | 8.799218254 |
| PP2B2    | 9.131394752 | 9.200903159  | 9.210771206 | 9.06152173   | 9.06152173  | 9.06152173  | 9.06152173  | 9.06152173  | 9.06152173  | 9.06152173  | 9.128578085 | 9.128578085  | 9.128578085 | 9.128578085 | 9.128578085 | 9.128578085 | 9.128578085 | 9.128578085 |
| SLC21A9  | 9.511688906 | 9.737788236  | 9.037760305 | 9.216486062  | 9.143193202 | 9.238563661 | 9.143193202 | 9.238563661 | 9.143193202 | 9.238563661 | 9.466287829 | 8.82453722   | 9.846805169 | 8.7727391   | 8.48015003  | 9.710912033 | 9.189895913 | 9.491181868 |
| PITHD1   | 8.817927756 | 9.812929476  | 9.058007881 | 9.710808545  | 9.100771971 | 8.997335151 | 9.180495013 | 9.820877647 | 9.228504123 | 9.101762264 | 9.938724273 | 9.343811074  | 9.129386951 | 9.291529565 | 9.194679091 | 9.063463247 | 9.200646025 | 9.158886761 |
| SMU1     | 9.028898657 | 9.0685557    | 9.789073055 | 9.085890668  | 9.671821172 | 9.222760249 | 8.931538544 | 9.157088064 | 9.478816768 | 9.528247696 | 8.846602548 | 9.05486832   | 9.10095621  | 9.05486832  | 9.10095621  | 9.05486832  | 9.10095621  | 9.05486832  |
| DUSP11   | 8.58301518  | 9.399887787  | 10.14930145 | 9.395644674  | 9.33504086  | 9.78592592  | 9.047192172 | 9.951913459 | 9.173230981 | 9.002164401 | 9.160315718 | 9.759561766  | 9.407798597 | 9.928516451 | 9.906995491 | 9.105454809 | 9.026946431 | 9.253467473 |
| IPO9     | 8.837013222 | 8.525177262  | 9.069178622 | 9.694718592  | 9.527518476 | 9.025222222 | 9.504174794 | 9.563912366 | 8.504174794 | 9.031873064 | 9.248804663 | 9.084576274  | 6.454206038 | 9.259107159 | 9.70362485  | 9.453731279 | 9.956638688 | 9.73258753  |
| UZAF1    | 9.47898488  | 9.04554829   | 9.370448816 | 9.12525162   | 9.506952974 | 9.568151364 | 9.153234007 | 8.807872369 | 9.219149254 | 9.546643897 | 8.80297378  | 9.099351617  | 9.349618437 | 9.180057017 | 8.611379499 | 9.342072557 | 8.274298326 | 9.312476682 |
| ESCO1    | 9.48043721  | 9.075793927  | 9.258898499 | 9.244739489  | 8.746052579 | 9.718780576 | 9.032656204 | 8.605800115 | 9.235560441 | 8.824820969 | 8.734818495 | 9.12926278   | 9.814579455 | 9.784439    |             |             |             |             |

|              |             |              |             |              |              |             |              |             |              |             |             |             |             |              |             |             |             |             |
|--------------|-------------|--------------|-------------|--------------|--------------|-------------|--------------|-------------|--------------|-------------|-------------|-------------|-------------|--------------|-------------|-------------|-------------|-------------|
| ACD12314.1   | 9.452699348 | 9.566993026  | 9.671176618 | 9.228168304  | 9.239980385  | 9.133747803 | 9.109695953  | 8.540382905 | 9.221945152  | 8.144575007 | 9.23314172  | 9.157872377 | 9.265784653 | 8.915883742  | 8.209130905 | 8.813929297 | 9.08863335  | 8.685145601 |
| STEGALNACI   | 9.184935184 | 9.148150208  | 9.104752022 | 9.082938274  | 9.074773205  | 9.536785456 | 9.098971339  | 9.068287749 | 8.918887788  | 9.113302362 | 9.087579695 | 9.490838296 | 9.47730163  | 9.159217050  | 9.319424385 | 9.121297575 | 9.140124664 | 9.059131334 |
| CEBPA2       | 9.461451589 | 9.140993178  | 9.100220128 | 9.045979998  | 9.046607000  | 9.668835029 | 9.444499318  | 8.684003656 | 8.684003656  | 8.684003656 | 8.673684643 | 9.171454544 | 9.622468423 | 9.492084626  | 9.723782896 | 9.289410116 | 9.611291420 | 9.121218586 |
| IGZF7        | 8.750578939 | 7.553520582  | 9.09789474  | 9.894427709  | 8.631966368  | 7.988273058 | 8.642895644  | 10.1452014  | 8.876201153  | 9.508324077 | 9.315176772 | 9.616732186 | 9.197849668 | 9.715104493  | 9.933849189 | 9.028978156 | 9.285801474 | 8.965349185 |
| KCTD9        | 9.170871131 | 8.460628234  | 8.860628234 | 9.280422622  | 9.280422622  | 8.476541734 | 8.011330969  | 9.77872332  | 9.24092497   | 9.24092497  | 8.026162316 | 9.056437976 | 8.674128979 | 9.475701665  | 9.63476556  | 9.270571924 | 9.390680417 | 9.634587118 |
| ACD12314.1.1 | 9.562695895 | 9.562695895  | 9.671042444 | 9.23985645   | 9.23985645   | 9.126385277 | 9.109575294  | 9.40280167  | 9.124711133  | 9.144466442 | 9.232018033 | 9.157750425 | 9.26559097  | 9.125213091  | 8.209039906 | 8.81388061  | 9.285845488 | 8.685033803 |
| ACD12314.1.2 | 9.452569986 | 9.566861107  | 9.671042613 | 9.28044979   | 9.23985644   | 9.109575285 | 9.540280158  | 9.214711213 | 9.144466433  | 9.233018024 | 9.157750425 | 9.265590988 | 9.8125313   | 8.209039906  | 8.81388061  | 9.088458389 | 8.685033803 | 8.685033803 |
| ACD12314.1.5 | 9.452569974 | 9.566861078  | 9.671042584 | 9.28044771   | 9.239856413  | 9.126385277 | 9.109575257  | 9.540280132 | 9.214711212  | 9.144466409 | 9.233017976 | 9.157750429 | 9.265590987 | 9.812531273  | 8.209039882 | 8.888458389 | 8.685033803 | 8.685033803 |
| RFN185       | 9.527639102 | 9.748520039  | 8.10922231  | 9.157136839  | 9.486051524  | 8.888381177 | 8.992478128  | 8.757272535 | 9.153348293  | 9.174000455 | 9.12648458  | 9.674097604 | 9.772374788 | 9.903248158  | 8.899201411 | 9.205314003 | 9.81300558  | 9.114674446 |
| DRG1         | 9.003796654 | 9.004235392  | 9.004235392 | 9.004235392  | 9.004235392  | 9.37873438  | 9.158957991  | 8.62984595  | 9.234542378  | 9.315949091 | 8.999373231 | 9.440559647 | 9.319699178 | 9.488846779  | 8.60632523  | 9.138212871 | 9.140718025 | 9.811001373 |
| MAPKAP2      | 8.762904515 | 9.827044174  | 9.87726947  | 9.8196093713 | 9.8196093713 | 9.419230733 | 9.611606197  | 9.04691382  | 9.829059595  | 9.141934583 | 9.13933527  | 9.209065859 | 9.615426389 | 9.511030715  | 9.371044337 | 9.000495412 | 9.480114015 | 8.686058308 |
| RFN13A       | 9.002667152 | 10.140214007 | 9.633216277 | 9.765919533  | 9.765919533  | 9.514573434 | 9.4482739127 | 8.978751413 | 9.123084479  | 9.075697575 | 9.30295907  | 9.619147861 | 9.605570211 | 9.899587895  | 8.809740497 | 9.094411656 | 8.991480176 | 8.7336221   |
| PHI11        | 9.19113525  | 9.487317915  | 9.233106441 | 9.410926322  | 9.49300472   | 9.965264095 | 9.942957916  | 9.0890597   | 9.0890597    | 9.0890597   | 8.94915396  | 9.299906503 | 9.306942665 | 8.69310283   | 9.131321811 | 9.175699554 | 9.861530097 | 9.650150084 |
| SPK5K81      | 9.948290382 | 8.085111928  | 9.066523444 | 9.09504503   | 9.037629489  | 9.407739392 | 8.529285891  | 9.382117603 | 9.214024453  | 9.29001334  | 9.01610157  | 9.305629381 | 9.948513475 | 8.464525542  | 9.376835176 | 9.485738892 | 9.139401463 | 9.356431303 |
| RTK25        | 8.331414841 | 9.004626688  | 9.331414841 | 9.331414841  | 9.331414841  | 9.551732349 | 9.056710562  | 9.386882523 | 9.103187617  | 9.147959055 | 9.150433339 | 9.121661385 | 9.13088444  | 9.885496868  | 9.954111201 | 8.8535131   | 9.208138421 | 8.797254381 |
| ND02         | 9.104864423 | 9.248774192  | 8.679516545 | 9.434296017  | 9.799750809  | 1.013768244 | 8.873159384  | 9.886016738 | 9.436418147  | 9.566578059 | 9.674126722 | 9.084161071 | 9.122038017 | 8.820958873  | 8.622770071 | 9.6398902   | 9.155720163 | 8.79346392  |
| RFN216       | 9.138454418 | 8.568325073  | 9.137881972 | 9.36448995   | 8.806222691  | 8.804205687 | 9.395226666  | 9.187142038 | 9.786125292  | 9.12633134  | 9.343225707 | 9.851406076 | 9.903560141 | 9.238993836  | 9.82613396  | 9.305266653 | 9.148571523 | 9.148571523 |
| PREPL        | 9.478698159 | 9.843816578  | 9.298330542 | 9.91988638   | 8.85118345   | 9.750671733 | 9.141175655  | 9.138069665 | 9.17425651   | 9.700877375 | 9.08900761  | 8.55058839  | 9.09491007  | 9.228634787  | 9.277057974 | 9.502391698 | 9.60447143  | 9.138039944 |
| RYU11        | 9.048398598 | 9.82129458   | 9.472096805 | 9.465203438  | 9.357873618  | 9.454024898 | 8.770630368  | 9.447710192 | 9.210373024  | 8.919034392 | 9.683240062 | 8.373298742 | 8.56638466  | 9.905349045  | 9.13625192  | 9.27462258  | 9.894007737 | 9.894007737 |
| MAN02B       | 9.261416198 | 9.092734196  | 9.086238989 | 9.105787897  | 9.180236254  | 9.504028677 | 9.057047256  | 9.086616588 | 9.512620641  | 9.52507574  | 9.187190903 | 9.171250252 | 6.84105791  | 9.50438647   | 9.104232037 | 9.69066768  | 9.025876942 | 9.085192807 |
| NAT5         | 9.180397594 | 9.238875885  | 9.932312781 | 9.100570827  | 9.15784978   | 9.849089755 | 9.376029256  | 9.290313524 | 9.715531887  | 9.816430246 | 8.87612054  | 8.59973635  | 9.39444326  | 9.26585846   | 9.225080139 | 9.148363511 | 9.132745282 | 9.359817779 |
| CH507-9B2.1  | 9.985585749 | 9.23254393   | 9.906666663 | 9.23005124   | 9.09130814   | 9.566002719 | 8.801300269  | 9.04544728  | 9.04544728   | 9.04544728  | 9.87612054  | 8.59973635  | 9.39444326  | 9.26585846   | 9.225080139 | 9.148363511 | 9.132745282 | 9.359817779 |
| PHK8         | 9.86347817  | 9.75783342   | 9.153524501 | 9.43447117   | 7.53495729   | 8.939087708 | 8.210387391  | 9.167791922 | 9.098911217  | 9.340712647 | 9.178719363 | 9.925461312 | 9.31909955  | 9.855928138  | 9.383222937 | 9.12058924  | 9.778693845 | 9.28977817  |
| IVD          | 9.452065992 | 8.26999931   | 8.874162433 | 9.51369746   | 8.64168522   | 8.165849005 | 8.463897453  | 9.385088445 | 8.737793362  | 9.311443038 | 8.818662682 | 9.158751808 | 9.74647157  | 9.858978188  | 9.100804215 | 9.115129853 | 9.291452127 | 9.291452127 |
| HUWE1        | 8.739737259 | 9.172312331  | 9.178237758 | 8.739737259  | 8.739737259  | 8.739737259 | 8.739737259  | 8.739737259 | 8.739737259  | 8.739737259 | 8.739737259 | 8.739737259 | 8.739737259 | 8.739737259  | 8.739737259 | 8.739737259 | 8.739737259 | 8.739737259 |
| CNOT9        | 9.17086597  | 8.108149728  | 9.101084051 | 9.101084051  | 9.101084051  | 9.101084051 | 9.101084051  | 9.101084051 | 9.101084051  | 9.101084051 | 9.101084051 | 9.101084051 | 9.101084051 | 9.101084051  | 9.101084051 | 9.101084051 | 9.101084051 | 9.101084051 |
| ACR          | 9.565958717 | 9.108609236  | 8.425913154 | 9.289045264  | 9.084373267  | 9.209886618 | 8.793130753  | 9.06969351  | 9.270381612  | 9.297060465 | 9.163115327 | 9.978852848 | 9.209769699 | 9.7367312928 | 8.724324217 | 9.70246722  | 9.367478198 | 9.068451569 |
| UBE2         | 9.491852863 | 9.421740271  | 9.491852863 | 9.491852863  | 9.491852863  | 9.491852863 | 9.491852863  | 9.491852863 | 9.491852863  | 9.491852863 | 9.491852863 | 9.491852863 | 9.491852863 | 9.491852863  | 9.491852863 | 9.491852863 | 9.491852863 | 9.491852863 |
| SHF1         | 8.693850887 | 9.524942946  | 8.455637302 | 9.428492556  | 9.115749629  | 9.178687702 | 8.825717475  | 9.60915445  | 9.21873607   | 9.008625556 | 9.211106827 | 9.494297399 | 9.753834718 | 9.895436666  | 9.780234395 | 9.204110177 | 9.154744383 | 9.77171357  |
| ADAM19       | 8.23030991  | 7.467087888  | 8.108467261 | 9.207126025  | 8.87599114   | 9.022543935 | 9.063272392  | 9.886067904 | 8.728645372  | 9.771857265 | 9.269480988 | 9.123191328 | 9.988822776 | 9.272191223  | 9.840207621 | 9.224920262 | 9.92739569  | 9.21797361  |
| CEBPB        | 9.441613626 | 9.487239347  | 9.786725561 | 9.39398054   | 9.786725561  | 9.089893567 | 9.305770975  | 9.003314354 | 9.003314354  | 9.003314354 | 9.440127594 | 9.423903363 | 8.812261357 | 9.195704523  | 9.06182364  | 9.061985775 | 8.845244839 | 8.969544056 |
| DUSP4        | 6.524818305 | 9.162815963  | 6.427642728 | 9.612874503  | 9.61863544   | 9.550611903 | 9.014614579  | 9.238281519 | 9.062655552  | 9.214059295 | 10.86731335 | 9.792431204 | 9.054779781 | 9.6355022    | 10.31611564 | 9.454062935 | 9.956344103 | 10.19264473 |
| COMT         | 9.51328182  | 9.22414839   | 8.849260429 | 9.520573314  | 9.849260429  | 9.859376994 | 9.156501106  | 9.707135517 | 10.683264741 | 9.226525219 | 9.307695447 | 9.102594765 | 10.04630929 | 9.368822337  | 9.78286971  | 8.82033     | 9.781372168 | 9.116148206 |
| ABP1         | 9.959604703 | 9.547030498  | 9.197665973 | 9.887400446  | 9.250937985  | 9.096751119 | 8.759696007  | 9.049598282 | 9.144196681  | 9.177655441 | 9.763185942 | 9.123364609 | 9.712382795 | 9.419398663  | 8.618517918 | 8.602676499 | 8.923308194 | 9.734174189 |
| MTN2         | 9.121460023 | 9.121460023  | 9.121460023 | 9.121460023  | 9.121460023  | 9.121460023 | 9.121460023  | 9.121460023 | 9.121460023  | 9.121460023 | 9.121460023 | 9.121460023 | 9.121460023 | 9.121460023  | 9.121460023 | 9.121460023 | 9.121460023 | 9.121460023 |
| TRAPPC4      | 9.495142478 | 9.054434784  | 9.054434784 | 9.054434784  | 9.054434784  | 9.054434784 | 9.054434784  | 9.054434784 | 9.054434784  | 9.054434784 | 9.054434784 | 9.054434784 | 9.054434784 | 9.054434784  | 9.054434784 | 9.054434784 | 9.054434784 | 9.054434784 |
| TMEM120A     | 9.104008687 | 9.61029807   | 9.127288053 | 9.944878227  | 9.589244476  | 9.406573551 | 9.137203919  | 8.715356009 | 9.01781979   | 9.181908674 | 9.124095829 | 9.135551072 | 9.433612186 | 9.224992528  | 8.783408931 | 9.020443428 | 8.809300669 | 9.388651676 |
| YES1         | 9.06003414  | 8.120064653  | 8.758082369 | 8.758082369  | 8.758082369  | 8.758082369 | 8.758082369  | 8.758082369 | 8.758082369  | 8.758082369 | 8.758082369 | 8.758082369 | 8.758082369 | 8.758082369  | 8.758082369 | 8.758082369 | 8.758082369 | 8.758082369 |
| DENN2C       | 9.390394209 | 9.321463351  | 9.874777826 | 8.537376064  | 9.24305416   | 8.54140641  | 8.789466875  | 9.348493731 | 9.040452752  | 9.299361427 | 9.025276115 | 9.486563027 | 9.498503536 | 9.870639549  | 9.686019159 | 9.18020403  | 9.081720291 | 9.138155673 |
| PKP2         | 9.888955226 | 8.374873029  | 8.920846045 | 9.888955226  | 9.888955226  | 9.888955226 | 9.888955226  | 9.888955226 | 9.888955226  | 9.888955226 | 9.888955226 | 9.888955226 | 9.888955226 | 9.888955226  | 9.888955226 | 9.888955226 | 9.888955226 | 9.888955226 |
| C22o7F3      | 9.431710479 | 9.263314634  | 9.133277819 | 9.294874129  | 9.506640646  | 9.120735572 | 8.671784037  | 9.013898749 | 9.263588768  | 8.848787562 | 9.059709988 | 9.497323692 | 9.56099712  | 9.53673065   | 9.941538318 | 9.128111464 | 8.783122155 | 9.808053898 |
| VPS52        | 9.05185237  | 9.205196994  | 9.343907032 | 9.1934070    |              |             |              |             |              |             |             |             |             |              |             |             |             |             |

|          |             |             |             |             |             |             |             |             |             |             |             |             |             |             |             |             |             |             |
|----------|-------------|-------------|-------------|-------------|-------------|-------------|-------------|-------------|-------------|-------------|-------------|-------------|-------------|-------------|-------------|-------------|-------------|-------------|
| PIOD3    | 8.910347511 | 9.55763688  | 9.75026878  | 9.038638903 | 8.96688381  | 9.08229556  | 9.01249077  | 9.15423952  | 9.108637223 | 9.07600158  | 9.10522921  | 8.91706788  | 9.164770352 | 9.32378207  | 9.238099965 | 8.964415886 | 9.118077247 | 9.362171644 |
| AFIM1    | 9.100812695 | 9.234364172 | 8.72221534  | 9.093616557 | 9.297772758 | 9.250709114 | 9.402992006 | 9.751086673 | 9.153169864 | 8.70720088  | 8.490587959 | 9.522161965 | 8.496599831 | 9.370366555 | 8.784651957 | 9.072376118 | 8.701737954 | 9.199939895 |
| NUDF8    | 9.008438992 | 9.506520522 | 9.496871298 | 9.826001770 | 9.469876359 | 9.492951146 | 9.890222507 | 9.882242407 | 9.158827526 | 8.83952626  | 9.51918597  | 9.62722327  | 9.388594212 | 9.183036228 | 8.823926823 | 9.038467065 | 8.99413525  | 9.406494941 |
| DNAF2    | 9.193164687 | 10.11973135 | 9.788622872 | 9.193554471 | 9.518135666 | 8.866114214 | 9.157672211 | 8.937860752 | 9.075599757 | 8.88584924  | 8.832157205 | 9.476157288 | 9.075623205 | 9.07529923  | 9.449754432 | 9.162550639 | 9.104154761 | 9.19315615  |
| MTHD1    | 8.613308644 | 8.63327776  | 8.511980197 | 8.613308644 | 8.63327776  | 8.511980197 | 8.613308644 | 8.63327776  | 8.511980197 | 8.613308644 | 8.63327776  | 8.511980197 | 8.613308644 | 8.63327776  | 8.511980197 | 8.613308644 | 8.63327776  | 8.511980197 |
| NOT6     | 9.165321667 | 10.04768301 | 9.071772299 | 9.058200555 | 8.784313669 | 8.77474415  | 9.11782222  | 9.655864092 | 9.019817809 | 9.057946909 | 8.97521139  | 8.82472584  | 9.11176234  | 9.387532847 | 8.889802465 | 8.84396767  | 9.396921745 | 9.11977959  |
| COL2A1   | 9.128519377 | 9.41293295  | 9.904609657 | 9.287294288 | 8.23937918  | 8.28236072  | 8.71110357  | 9.07490816  | 9.237550661 | 9.04126889  | 8.68129651  | 8.99159342  | 8.42431367  | 9.989729478 | 9.430020871 | 9.451381192 | 9.45828112  | 8.998398789 |
| ARIID2   | 6.90495795  | 8.557332159 | 10.01727388 | 8.573265159 | 10.01727388 | 8.573265159 | 10.01727388 | 8.573265159 | 10.01727388 | 8.573265159 | 10.01727388 | 8.573265159 | 10.01727388 | 8.573265159 | 10.01727388 | 8.573265159 | 10.01727388 | 8.573265159 |
| SLC11A2  | 9.100273665 | 8.33141729  | 9.105751156 | 8.14614174  | 9.402369687 | 9.217690983 | 8.574852299 | 9.532536428 | 9.340480366 | 9.250747879 | 9.065258834 | 9.040422463 | 9.344032318 | 8.804147374 | 9.633264648 | 9.362805945 | 9.189463333 | 9.454804883 |
| ZBT21    | 8.609596864 | 8.100114972 | 8.814601198 | 9.243285689 | 8.946293668 | 8.264936368 | 8.598106551 | 9.394325689 | 9.035337532 | 9.328823334 | 9.331877779 | 8.524167035 | 9.305109529 | 8.69626568  | 9.37350497  | 9.372891284 | 9.144011134 | 9.146040822 |
| UNC5A5   | 9.19331407  | 9.213371175 | 9.222260863 | 9.059096168 | 9.2522496   | 8.77182478  | 9.029591422 | 9.2522496   | 8.697289517 | 9.002642058 | 9.22665507  | 9.31251846  | 9.178272375 | 9.723362599 | 8.888429858 | 9.028933116 | 9.143095518 | 8.807893765 |
| CR1      | 9.187108703 | 8.858934311 | 9.391961932 | 9.166766658 | 9.034799412 | 9.137499412 | 9.21896625  | 8.366684843 | 9.404730609 | 8.810988348 | 9.248543404 | 9.729640965 | 9.604979086 | 9.234019022 | 8.894656415 | 8.932053479 | 9.870566771 | 12.48327643 |
| MPS2     | 9.100857256 | 9.930273691 | 8.629763261 | 11.61728222 | 9.655864092 | 9.019817809 | 9.057946909 | 8.97521139  | 8.82472584  | 9.11176234  | 9.387532847 | 8.889802465 | 8.84396767  | 9.396921745 | 9.11977959  | 9.11977959  | 9.11977959  | 9.11977959  |
| CK7      | 9.584203077 | 8.64241485  | 9.465127077 | 8.912231527 | 8.576228688 | 8.940465888 | 8.705440068 | 9.196917424 | 9.29429475  | 9.3000887   | 9.471331939 | 8.543120166 | 10.3490761  | 9.81293299  | 9.201993826 | 8.978084382 | 9.02421154  | 8.646288402 |
| NASP     | 9.123489187 | 9.059643295 | 9.187584272 | 9.187584272 | 9.187584272 | 9.187584272 | 9.187584272 | 9.187584272 | 9.187584272 | 9.187584272 | 9.187584272 | 9.187584272 | 9.187584272 | 9.187584272 | 9.187584272 | 9.187584272 | 9.187584272 | 9.187584272 |
| BAG6     | 9.58829411  | 9.501190964 | 9.714215414 | 9.06358303  | 9.015900264 | 9.37582344  | 9.538087719 | 9.282608021 | 8.799012558 | 9.460631372 | 9.176301672 | 9.547341761 | 8.686318521 | 9.34170627  | 9.92338499  | 8.774642139 | 8.958712113 | 8.832913135 |
| XRR1A    | 8.346705731 | 8.830264042 | 7.579891611 | 9.161624538 | 8.500194819 | 8.732526319 | 9.568257407 | 9.58692016  | 9.082179137 | 9.505242355 | 9.163996951 | 9.109671338 | 9.023214042 | 8.529256915 | 9.417434523 | 9.19737887  | 9.625343718 | 9.253533152 |
| SLC39A1  | 9.669392922 | 8.697077918 | 9.414082477 | 9.211750451 | 9.186180011 | 8.970979779 | 9.338889896 | 9.031609192 | 9.094551442 | 8.891242143 | 9.15559641  | 9.096604481 | 9.012100455 | 9.329120624 | 8.829370682 | 8.699082032 | 8.717911824 | 9.381952238 |
| WDFY1    | 8.93306758  | 9.36950358  | 7.901028454 | 9.001239457 | 9.500115967 | 6.089799799 | 9.177105874 | 8.930981513 | 9.177105874 | 9.241482141 | 9.148650313 | 9.928193521 | 9.038615177 | 8.281374158 | 9.356914166 | 9.342694913 | 9.224081199 | 8.775441753 |
| PNKG     | 8.19483734  | 8.951177327 | 9.30804821  | 9.846017623 | 9.137726054 | 7.568655179 | 8.938635497 | 9.362138614 | 9.416596113 | 8.767807014 | 9.069911341 | 9.437572667 | 9.808179649 | 9.471761249 | 8.789486536 | 9.217429882 | 9.117871621 | 8.905746658 |
| ATG4     | 8.28735839  | 9.335819117 | 8.843535897 | 9.461836425 | 9.770009239 | 9.216479269 | 9.049852567 | 9.297007231 | 9.36312325  | 9.059123519 | 8.897412774 | 9.1321188   | 9.57055713  | 9.476555545 | 8.734514815 | 9.224388854 | 9.118200289 | 8.953209913 |
| TMEM170A | 8.008437607 | 9.107305011 | 8.770305011 | 9.594381218 | 9.39017307  | 8.230080598 | 8.981126185 | 9.003414333 | 9.097450686 | 9.689935963 | 9.97855942  | 9.02188333  | 9.641727235 | 8.890711484 | 9.094400225 | 9.278045233 | 8.579442425 | 9.846462829 |
| PCD2     | 9.171091374 | 9.502167325 | 9.658224901 | 9.594215764 | 9.526457343 | 9.606775534 | 9.097213214 | 8.688121897 | 8.995947982 | 9.094201173 | 9.196218708 | 9.04051131  | 9.090729914 | 8.573731507 | 8.558476398 | 9.051379654 | 8.881851567 | 8.811922116 |
| VPS26B   | 9.606215703 | 9.900739756 | 9.651710051 | 9.282005439 | 9.281173053 | 9.652015695 | 9.088092416 | 9.081801126 | 9.088992416 | 9.057102381 | 9.092343949 | 9.438574813 | 8.56831578  | 9.412229887 | 9.270303571 | 9.863376988 | 9.05061241  | 8.732672161 |
| MAP3K5   | 9.179032759 | 8.668834602 | 8.653548462 | 9.960321301 | 8.882986885 | 8.709302056 | 8.669696071 | 8.772371104 | 9.377341142 | 9.802215993 | 9.479564572 | 9.178976328 | 8.608177212 | 9.611683018 | 9.128270913 | 9.171251487 | 8.993228656 | 9.054304334 |
| NCOA2    | 7.892349416 | 8.988915708 | 8.71092281  | 7.800212087 | 9.468344    | 9.087905665 | 9.084431332 | 9.204652239 | 9.377885994 | 9.920249786 | 9.843474267 | 8.239204525 | 9.43831071  | 8.21466189  | 9.4911616   | 8.989894996 | 9.327301734 | 8.98898197  |
| NAGA     | 8.732165542 | 9.66382327  | 7.925973912 | 9.185480612 | 9.379828329 | 9.656512235 | 9.037758207 | 9.108691477 | 9.04264882  | 8.893079135 | 9.28429445  | 9.37294386  | 8.199769889 | 8.493165548 | 9.23278799  | 9.074257732 | 8.961143469 | 9.103136744 |
| GMP17    | 8.26583694  | 8.26583694  | 8.26583694  | 8.26583694  | 8.26583694  | 8.26583694  | 8.26583694  | 8.26583694  | 8.26583694  | 8.26583694  | 8.26583694  | 8.26583694  | 8.26583694  | 8.26583694  | 8.26583694  | 8.26583694  | 8.26583694  | 8.26583694  |
| KHL21    | 8.755472898 | 9.074607699 | 8.706640344 | 9.799910848 | 9.785615445 | 8.84658709  | 8.251312821 | 9.407475991 | 9.332476378 | 9.087803819 | 9.130248245 | 9.216019435 | 9.22643447  | 9.397768374 | 9.103929879 | 8.436874337 | 8.946562459 | 9.105114256 |
| ZMYM5    | 9.209603055 | 9.324886489 | 8.28303328  | 9.371385776 | 9.213249685 | 8.846246802 | 9.024522425 | 9.24109834  | 9.017504877 | 8.391326386 | 9.088398052 | 9.284418171 | 9.636492321 | 9.499664132 | 9.093115586 | 9.010262496 | 8.588095101 | 9.051806669 |
| ATP9B    | 8.435826809 | 7.820707976 | 9.122226747 | 9.302166902 | 8.748301672 | 9.947350165 | 9.2043374   | 8.85620596  | 9.27761034  | 8.85620596  | 8.97760152  | 9.284939398 | 8.038912367 | 9.57957613  | 9.570927702 | 9.54441395  | 9.369265617 | 9.458192447 |
| PRPSA1   | 9.26576938  | 9.451122868 | 9.636571824 | 8.576417189 | 9.174812298 | 9.410667774 | 9.368937676 | 9.351806259 | 8.786136929 | 9.012481884 | 8.889584982 | 9.685773471 | 9.151225033 | 8.432414991 | 9.748904196 | 8.452962499 | 9.062529926 | 9.115045463 |
| MAU2     | 8.194832316 | 9.244357077 | 8.149232387 | 9.636580301 | 9.784280767 | 8.496508484 | 8.784280767 | 9.349594915 | 9.155952192 | 9.470471749 | 8.816227789 | 9.965112377 | 9.780990851 | 9.086480643 | 9.630579237 | 9.089190969 | 9.56319307  | 9.91907669  |
| PK3      | 8.602439103 | 9.153178458 | 9.07635792  | 9.132165946 | 8.295827773 | 9.099117276 | 7.794864706 | 8.920751811 | 9.159178919 | 9.214484975 | 9.303413975 | 8.865498468 | 7.402515383 | 8.970725086 | 9.098446234 | 8.979033997 | 9.624334042 | 9.363320261 |
| GNAT     | 9.55054374  | 9.258979497 | 8.44163689  | 9.854049109 | 8.862150568 | 9.801717319 | 9.945973423 | 9.251989712 | 9.176500472 | 8.973670219 | 8.09374676  | 9.483297575 | 8.082516089 | 9.480584033 | 9.237660476 | 9.184044663 | 9.59848726  | 9.103136744 |
| LIPA     | 9.419370716 | 9.11671135  | 9.074607911 | 9.047485903 | 9.044659803 | 9.044659803 | 9.044659803 | 9.044659803 | 9.044659803 | 9.044659803 | 9.044659803 | 9.044659803 | 9.044659803 | 9.044659803 | 9.044659803 | 9.044659803 | 9.044659803 | 9.044659803 |
| SF3A1    | 9.264715426 | 8.448440275 | 9.016946602 | 9.823471526 | 8.78933782  | 9.262184997 | 9.280048559 | 8.404759878 | 9.028838777 | 9.029726608 | 9.552812578 | 7.820076511 | 9.09552933  | 8.72056641  | 9.05770875  | 9.307972268 | 9.147476152 | 8.9061321   |
| GNM1     | 9.172517776 | 9.029689533 | 8.624813768 | 9.187310303 | 9.498583967 | 8.739233536 | 9.088396336 | 9.095183377 | 9.101417610 | 9.521474854 | 9.140773697 | 9.06608987  | 9.50927276  | 8.491292894 | 9.075945    | 8.477384841 | 8.22906593  | 9.103136744 |
| LETM1D   | 9.382654814 | 8.905572637 | 9.146817659 | 9.048873061 | 9.12116136  | 9.898338315 | 8.563676411 | 8.962663388 | 9.446626575 | 8.98414986  | 9.41883815  | 8.771932921 | 8.717048201 | 9.23718534  | 8.895977153 | 9.290380967 | 9.258961023 | 9.287820714 |
| TTN      | 9.138263916 | 8.967742617 | 8.967742617 | 8.628005979 | 9.078096623 | 9.548813529 | 9.100094269 | 9.610044348 | 8.611783113 | 9.894366705 | 9.948534743 | 9.540848812 | 9.09187734  | 9.479944156 | 9.388029935 | 9.951968853 | 9.322290253 | 9.103136744 |
| STK17A   | 8.27247507  | 9.609479638 | 9.487057926 | 9.12320844  | 9.487057926 | 9.12320844  | 9.487057926 | 9.12320844  | 9.487057926 | 9.12320844  | 9.487057926 | 9.12320844  | 9.487057926 | 9.12320844  | 9.487057926 | 9.12320844  | 9.487057926 | 9.12320844  |
| DNAI3    | 9.207757199 | 9.60992564  | 9.494904156 | 9.634146588 | 9.50017725  | 9.110267004 | 9.594557043 | 9.035894992 | 9.057910358 | 8.562420814 | 8.          |             |             |             |             |             |             |             |





|           |              |             |             |             |             |             |             |             |             |             |             |             |             |             |             |             |             |             |
|-----------|--------------|-------------|-------------|-------------|-------------|-------------|-------------|-------------|-------------|-------------|-------------|-------------|-------------|-------------|-------------|-------------|-------------|-------------|
| HERC2     | 9.374520914  | 8.644978592 | 8.838132328 | 8.481684817 | 9.285278621 | 9.700861836 | 9.218023984 | 8.963714811 | 8.423185373 | 8.95592418  | 8.73316968  | 9.182237519 | 9.641490487 | 9.232411664 | 8.898722557 | 9.066557034 | 9.021072154 | 9.026115488 |
| CERS5     | 9.158430534  | 8.635107949 | 8.936320061 | 9.445264552 | 9.025154488 | 8.647287429 | 9.22671155  | 9.032686683 | 9.79542603  | 8.653914505 | 9.189136752 | 9.209674616 | 9.312178283 | 9.00880166  | 9.063993452 | 8.942039461 |             |             |
| TEC83     | 9.23474769   | 9.547024983 | 9.435089942 | 9.290708179 | 9.045271498 | 8.063295138 | 9.516380974 | 9.038660188 | 9.002631267 | 9.17533571  | 9.168041807 | 8.474489119 | 9.17960278  | 8.732045111 | 9.26756787  | 8.848075277 | 9.849310047 | 9.720873665 |
| THY11     | 9.29229047   | 8.66363032  | 9.044025262 | 8.929503367 | 9.55531331  | 9.57476537  | 9.27562882  | 8.462705548 | 9.06273743  | 8.654291055 | 8.626121947 | 9.096641772 | 9.692328085 | 9.568384169 | 8.703332369 | 8.653604066 | 8.679029491 | 8.700679437 |
| HSC3A     | 9.12352446   | 8.700857932 | 9.048541132 | 8.908500043 | 9.60345112  | 8.898665783 | 9.40419345  | 8.822979084 | 8.642307225 | 8.791933862 | 8.791933862 | 8.235440267 | 8.791933862 | 8.235440267 | 8.983551851 | 9.134276348 | 9.237560426 | 9.237560426 |
| MLKL      | 8.884790907  | 8.722646549 | 8.608237264 | 8.720696272 | 8.252590472 | 8.674948153 | 10.00601274 | 8.795898277 | 8.945224669 | 9.464007048 | 8.91270772  | 9.066111371 | 9.28057090  | 9.26016579  | 9.26016579  | 9.204097014 | 9.126186183 | 9.126186183 |
| RNF126    | 9.156780312  | 9.016280010 | 8.949849803 | 9.077844335 | 9.059765829 | 8.498207158 | 9.332302995 | 8.834757581 | 9.200260261 | 8.794992721 | 8.830391137 | 9.152422309 | 8.76710738  | 9.438568648 | 9.020292558 | 8.750531613 | 8.439270209 | 8.527026134 |
| SAHHD1    | 8.429464562  | 9.1900918   | 8.942593143 | 9.06369505  | 9.095795678 | 9.192387429 | 9.581126736 | 9.192387429 | 9.581126736 | 9.192387429 | 9.581126736 | 9.192387429 | 9.581126736 | 9.192387429 | 9.581126736 | 9.192387429 | 9.581126736 | 9.192387429 |
| DMAP1     | 9.008148563  | 9.113888339 | 8.269645658 | 9.286971985 | 9.325756013 | 9.101874172 | 9.265517441 | 8.762030682 | 8.827367172 | 8.985943608 | 8.815294533 | 9.626666305 | 9.317732952 | 9.213044479 | 8.848094497 | 9.51562466  | 8.612206520 | 9.074266252 |
| SNX13     | 9.032708653  | 9.068307981 | 9.497279597 | 9.139832944 | 9.235945294 | 9.063708831 | 8.807933236 | 9.194097247 | 9.303368778 | 9.18271472  | 9.426877728 | 9.001499355 | 9.126161435 | 9.127126633 | 9.001615589 |             |             |             |
| TRA2A     | 9.984590924  | 9.204335382 | 8.822613187 | 9.204335382 | 8.822613187 | 9.204335382 | 8.822613187 | 9.204335382 | 8.822613187 | 9.204335382 | 8.822613187 | 9.204335382 | 8.822613187 | 9.204335382 | 8.822613187 | 9.204335382 | 8.822613187 | 9.204335382 |
| UBE2V     | 9.968857015  | 8.448018282 | 8.686904011 | 9.174938906 | 9.105171769 | 8.845831901 | 8.998264474 | 8.459704046 | 9.033064653 | 9.39605552  | 9.214202399 | 9.799690779 | 9.639242692 | 9.419905959 | 8.873814836 | 9.047608605 | 9.01051242  | 9.175603212 |
| FAM126B   | 9.512634431  | 9.219599499 | 8.948571163 | 8.948571163 | 8.948571163 | 8.948571163 | 8.948571163 | 8.948571163 | 8.948571163 | 8.948571163 | 8.948571163 | 8.948571163 | 8.948571163 | 8.948571163 | 8.948571163 | 8.948571163 | 8.948571163 | 8.948571163 |
| YTHDC1    | 9.021773688  | 8.937136502 | 8.688943243 | 7.747070261 | 8.664287293 | 8.466420778 | 9.008631886 | 9.547848459 | 9.272172514 | 8.99368751  | 9.356579181 | 9.87555321  | 9.85820343  | 9.266930592 | 9.379619119 | 9.45065899  | 9.12819512  | 9.298586496 |
| LINC01420 | 9.1592313748 | 9.002842566 | 9.004761068 | 9.002842566 | 9.004761068 | 9.002842566 | 9.004761068 | 9.002842566 | 9.004761068 | 9.002842566 | 9.004761068 | 9.002842566 | 9.004761068 | 9.002842566 | 9.004761068 | 9.002842566 | 9.004761068 | 9.002842566 |
| CNNM3     | 9.53996677   | 8.81813696  | 9.157464751 | 9.310330344 | 9.456177696 | 9.33948621  | 9.385490112 | 7.320219461 | 9.051791758 | 8.733887685 | 8.875522914 | 8.24422122  | 8.977986736 | 8.649990699 | 9.156992476 | 9.275411112 | 8.932574355 | 8.950149309 |
| ZFYVE21   | 9.085796569  | 9.329022782 | 9.164625562 | 9.329022782 | 9.164625562 | 9.329022782 | 9.164625562 | 9.329022782 | 9.164625562 | 9.329022782 | 9.164625562 | 9.329022782 | 9.164625562 | 9.329022782 | 9.164625562 | 9.329022782 | 9.164625562 | 9.329022782 |
| HERC3     | 10.0294991   | 8.86850925  | 9.037048718 | 9.062318003 | 8.74540002  | 9.287674401 | 8.780659512 | 9.181183611 | 8.654370722 | 9.469050303 | 8.451607352 | 8.991720606 | 8.894550804 | 9.168888693 | 9.373872573 | 9.301020353 | 9.081704066 | 8.68096759  |
| VAMP5     | 9.855298995  | 9.084144056 | 9.568728974 | 9.648472888 | 9.03905459  | 9.187529225 | 9.167416631 | 7.661075003 | 8.99108457  | 9.275592752 | 8.947698835 | 9.45770881  | 9.19070856  | 9.244798046 | 7.656105521 | 8.571538284 | 8.867039424 | 8.968379774 |
| HSP1      | 9.99746098   | 8.965236236 | 9.181541718 | 9.158772557 | 8.686014775 | 8.183095747 | 9.389790836 | 9.025958883 | 8.92221243  | 9.195186809 | 9.00173653  | 8.812610798 | 9.038029904 | 8.84101026  | 8.765725565 | 8.920940266 | 9.635428495 | 9.635428495 |
| FRG1      | 9.523518727  | 8.848490916 | 9.223256533 | 9.320289379 | 9.330277471 | 9.455436127 | 9.484591235 | 8.780460864 | 9.001362174 | 8.558517315 | 8.765277096 | 9.797066602 | 9.916780136 | 9.247050921 | 8.729534667 | 8.897807372 | 8.966564848 | 9.020771816 |
| PLAA      | 9.023842739  | 9.396066319 | 9.227328429 | 8.527464828 | 9.532946822 | 8.543760753 | 9.490237387 | 8.597668883 | 9.209772555 | 8.66248882  | 9.047755629 | 8.541037307 | 9.599243718 | 8.643890084 | 8.812865630 | 9.141517939 | 9.002234663 |             |
| VAMP4     | 9.152052154  | 9.198589842 | 9.392158123 | 9.157645649 | 9.105307303 | 9.724011896 | 8.919611602 | 8.5258261   | 8.865463722 | 8.660502225 | 8.707350831 | 9.502297826 | 10.0006645  | 9.146876372 | 9.177945846 | 8.660284441 | 8.338889033 | 8.723958208 |
| RINT1     | 9.041310487  | 7.863154867 | 9.206808247 | 9.010361024 | 9.059911468 | 9.039624549 | 8.467399112 | 9.010361024 | 9.059911468 | 8.687387114 | 9.614396867 | 9.707061648 | 9.433948967 | 9.341133703 | 9.07501938  | 8.757335355 |             |             |
| CTDNEP1   | 9.017423795  | 9.56456584  | 9.112949115 | 9.130113827 | 9.008812085 | 9.231126571 | 8.80086415  | 8.780162295 | 8.812166635 | 9.3791001   | 9.059111181 | 9.595911458 | 9.521817758 | 8.72000426  | 8.767784644 | 8.867219349 | 8.639824547 |             |
| SNRPB     | 9.694318598  | 9.57891913  | 8.59428912  | 8.885572979 | 9.503865534 | 9.237692049 | 9.241140682 | 8.647738905 | 9.391798599 | 8.782368888 | 9.069160274 | 9.972575803 | 9.049569668 | 8.513903264 | 8.540266507 | 8.52586467  | 8.667580304 | 9.178018276 |
| TUBGCP3   | 9.444604677  | 9.106795283 | 7.119512013 | 8.72154156  | 8.655442167 | 8.515620372 | 8.605358495 | 9.10558877  | 9.345988775 | 9.173374838 | 9.210833538 | 8.87535269  | 8.594776779 | 9.73917867  | 9.0666770   | 9.155607464 | 9.55050526  |             |
| CTDNEP2   | 9.332513446  | 9.12352446  | 9.12352446  | 9.12352446  | 9.12352446  | 9.12352446  | 9.12352446  | 9.12352446  | 9.12352446  | 9.12352446  | 9.12352446  | 9.12352446  | 9.12352446  | 9.12352446  | 9.12352446  | 9.12352446  | 9.12352446  | 9.12352446  |
| CDL23     | 9.349894813  | 9.349894813 | 9.349894813 | 9.349894813 | 9.349894813 | 9.349894813 | 9.349894813 | 9.349894813 | 9.349894813 | 9.349894813 | 9.349894813 | 9.349894813 | 9.349894813 | 9.349894813 | 9.349894813 | 9.349894813 | 9.349894813 | 9.349894813 |
| COG5      | 8.672053262  | 9.470806278 | 9.740606728 | 9.52191466  | 9.319112345 | 9.559692697 | 8.067027981 | 8.666672585 | 8.69442543  | 9.021653417 | 9.359956421 | 8.887378814 | 8.434528697 | 9.50543319  | 9.98989761  | 9.407512855 | 9.11952522  | 8.135515033 |
| C1orf27   | 8.463813013  | 9.279966421 | 9.759966421 | 8.463813013 | 9.279966421 | 9.759966421 | 8.463813013 | 9.279966421 | 9.759966421 | 8.463813013 | 9.279966421 | 9.759966421 | 8.463813013 | 9.279966421 | 9.759966421 | 8.463813013 | 9.279966421 | 9.759966421 |
| SUPT4H1   | 9.094803637  | 9.669898158 | 9.477835633 | 9.983216689 | 9.165743808 | 9.153112107 | 9.47484177  | 8.668905172 | 8.808475096 | 9.037021046 | 9.607847336 | 9.95984762  | 9.25093351  | 8.800541429 | 8.596427041 | 9.47483631  | 8.686877766 | 8.670370721 |
| BLVR4     | 8.565339127  | 9.174632243 | 8.897801246 | 9.514920166 | 9.34791132  | 8.773460356 | 9.122276717 | 8.569886121 | 9.64490371  | 8.850023027 | 8.78439265  | 10.00315129 | 8.82654305  | 9.135205921 | 8.832243822 | 9.776200521 |             |             |
| SMYD2     | 9.357069171  | 8.808580239 | 9.557181567 | 9.399162997 | 8.933908698 | 9.311774452 | 9.628504417 | 9.032157699 | 9.404402765 | 8.949211517 | 9.22042607  | 8.65617925  | 9.539941192 | 8.188122715 | 8.79848372  | 8.630088479 | 9.89779301  | 9.875816343 |
| FKBP1     | 9.426403978  | 9.206707889 | 8.82567945  | 9.419909779 | 8.818990779 | 8.784129029 | 9.534156123 | 8.686657733 | 9.394997973 | 8.947949793 | 8.847922966 | 9.020448716 | 9.321864404 | 9.094805995 | 9.184117657 | 8.381428812 | 9.93811467  | 9.103531515 |
| VTG1      | 8.996642151  | 9.066707094 | 9.01080023  | 9.226610411 | 9.12906578  | 9.12906578  | 9.226610411 | 9.12906578  | 9.226610411 | 9.12906578  | 9.226610411 | 9.12906578  | 9.226610411 | 9.12906578  | 9.226610411 | 9.12906578  | 9.226610411 | 9.12906578  |
| ROCK2     | 8.806762877  | 8.780840385 | 8.744711803 | 8.560009001 | 9.738479998 | 8.80981489  | 8.618495497 | 9.068249813 | 9.004257335 | 9.537611668 | 8.95028111  | 8.712717121 | 9.464602905 | 9.007892977 | 9.306704249 | 9.94726613  | 9.374891322 | 9.564466657 |
| PH3       | 9.390902689  | 8.390902689 | 8.390902689 | 8.390902689 | 8.390902689 | 8.390902689 | 8.390902689 | 8.390902689 | 8.390902689 | 8.390902689 | 8.390902689 | 8.390902689 | 8.390902689 | 8.390902689 | 8.390902689 | 8.390902689 | 8.390902689 | 8.390902689 |
| UBA6      | 8.370706462  | 9.174537398 | 8.893646486 | 9.511821869 | 8.800808145 | 9.686253435 | 9.511302844 | 9.121601409 | 9.709403707 | 9.320482645 | 9.176336615 | 9.020905959 | 9.142383861 | 8.889768903 | 8.477499917 | 9.197359235 | 9.169648706 | 9.188375231 |
| NPAT      | 9.087150031  | 8.979526154 | 8.819096216 | 9.450976215 | 9.71830537  | 9.466079675 | 9.235186643 | 8.935211133 | 8.554328583 | 8.955597725 | 7.316210033 | 10.1059464  | 9.901761203 | 9.107838829 | 8.823671956 | 9.788917513 |             |             |
| STAR2D    | 9.15461111   | 9.450407689 | 8.945935952 | 9.059702472 | 9.644645536 | 9.027250089 | 9.116089249 | 9.216705525 | 8.54869523  | 9.172651769 | 8.949211517 | 9.22042607  | 8.65617925  | 9.539941192 | 8.188122715 | 8.79848372  | 8.630088479 | 9.89779301  |
| ATP9B1B2  | 9.17703585   | 9.14348486  | 8.831943498 | 9.05791925  | 9.257105023 | 8.082117469 | 8.854754065 | 8.82548346  | 8.754985185 | 8.872256679 | 9.312489275 | 9.301298718 | 9.634429672 | 9.16566225  | 9.100755685 | 8.835776475 | 9.727171731 |             |



|          |             |             |             |             |             |             |             |             |             |             |             |             |             |             |             |             |             |             |
|----------|-------------|-------------|-------------|-------------|-------------|-------------|-------------|-------------|-------------|-------------|-------------|-------------|-------------|-------------|-------------|-------------|-------------|-------------|
| ZDHC12   | 9.429069542 | 9.487583452 | 9.238512218 | 8.653895851 | 9.264787822 | 8.479728379 | 8.811737568 | 8.209798795 | 9.06534785  | 8.711625486 | 8.924766574 | 9.192746442 | 8.977661656 | 8.266029873 | 8.750245234 | 8.419347651 | 8.313788007 | 9.14424582  |
| ZNF106   | 9.013420222 | 9.724683724 | 9.259948514 | 9.245260327 | 9.368144633 | 9.126729351 | 7.446481576 | 9.052721625 | 7.740835367 | 8.740385367 | 8.740953679 | 9.269833738 | 9.251125661 | 9.088329827 | 8.887963252 | 9.101260352 | 8.74432422  | 8.693702044 |
| SIMAP    | 8.502494822 | 9.773041519 | 8.927476369 | 9.019855779 | 9.042555066 | 8.658626666 | 8.086580598 | 8.971670945 | 8.534005211 | 8.907886157 | 9.048576205 | 8.900395028 | 8.85089798  | 8.046661132 | 9.261156374 | 8.855390332 | 9.25425185  | 9.202402808 |
| CREBB    | 8.26203048  | 8.217302482 | 8.141891607 | 8.280092098 | 8.105203914 | 8.740251167 | 9.787166108 | 9.630834766 | 8.889489487 | 9.020027924 | 9.29551815  | 8.896193666 | 8.138706877 | 8.05005735  | 9.23271405  | 9.020438459 | 9.278680711 | 8.779580011 |
| SUZ12    | 8.427040815 | 9.16040952  | 9.173413967 | 9.235713867 | 9.28440637  | 9.30180564  | 8.894642043 | 8.775252814 | 9.119625866 | 8.93649991  | 8.235713867 | 8.52389811  | 8.852951311 | 9.154844804 | 9.160720216 | 9.160720216 | 9.24446138  | 9.24446138  |
| LTS1     | 8.565179418 | 8.456817885 | 8.45493939  | 8.562193141 | 9.044434368 | 9.09676311  | 9.390202751 | 8.599483699 | 8.29873888  | 8.700690069 | 8.865142116 | 8.005262969 | 8.74221211  | 9.40139663  | 9.025666633 | 8.124435587 | 8.627592758 | 8.780901574 |
| PAN2     | 8.962034388 | 8.935044694 | 8.843054114 | 8.91226824  | 8.63465459  | 8.547331259 | 8.876495578 | 9.735237428 | 8.891269098 | 8.820401974 | 8.8395147   | 9.743773295 | 9.628031559 | 8.345056289 | 9.102606618 | 9.192020884 | 9.10494512  | 9.416261818 |
| EFAE2    | 8.981262558 | 8.945407766 | 8.570398987 | 8.570398987 | 8.966512215 | 9.147246838 | 9.151166777 | 8.966512215 | 9.184722215 | 8.824809773 | 8.930349351 | 8.398828655 | 8.406828657 | 8.835270722 | 8.661489742 | 8.9103183   | 8.197909705 | 9.025005043 |
| SETD5    | 8.394454438 | 8.873586473 | 9.027628295 | 8.542403374 | 8.240470313 | 8.689640003 | 8.453870881 | 9.551086309 | 8.603042022 | 9.620132752 | 9.278466038 | 8.35826299  | 9.386461217 | 8.65812953  | 9.1687571   | 9.25424674  | 9.0742486   | 9.02229943  |
| ZNRF2    | 8.303318119 | 8.83061297  | 8.722776216 | 8.722776216 | 9.479398937 | 8.956548511 | 8.963272055 | 8.987198476 | 8.892247405 | 8.956352105 | 9.260942311 | 9.466290932 | 8.388454969 | 8.568250295 | 8.93938464  | 8.574074666 | 8.78646209  | 8.78646209  |
| DRAP1    | 8.750670018 | 9.16499217  | 8.901463811 | 8.956313796 | 9.152381725 | 9.189323405 | 8.803586237 | 8.668281176 | 8.903586237 | 8.668281176 | 9.04744607  | 8.898573746 | 9.5741257   | 9.263488091 | 8.571821019 | 8.798727312 | 8.721180325 | 9.086081648 |
| SS18L2   | 9.272254767 | 9.396110392 | 9.209682416 | 9.44677691  | 9.0490512   | 8.883758186 | 8.760555814 | 8.536963922 | 8.927989562 | 8.927989562 | 8.700376871 | 9.169180746 | 9.611649052 | 9.015052892 | 8.531484266 | 8.908286283 | 8.546157798 | 8.956579398 |
| LTS1     | 8.842570846 | 9.681148785 | 9.300285842 | 9.25075367  | 9.578429201 | 9.434250427 | 8.467201857 | 8.635376966 | 8.65473282  | 9.081381572 | 9.71448884  | 9.022783686 | 8.77058471  | 8.637504272 | 8.67855448  | 7.985339581 |             |             |
| PCGF3    | 8.968842191 | 8.590644771 | 9.4605548   | 8.778815322 | 8.97349802  | 8.563652387 | 9.05391471  | 8.911343648 | 8.447402616 | 9.124190643 | 8.979574374 | 8.550908388 | 8.394741955 | 9.26311755  | 9.93455115  | 8.777644262 | 8.958626723 | 9.088285503 |
| MANZC1   | 8.924063844 | 8.590306335 | 8.855479792 | 9.06043844  | 8.53089208  | 8.835183057 | 8.901646502 | 8.980629239 | 8.691646502 | 9.406853231 | 8.420262886 | 8.948011896 | 8.8408988   | 9.06010704  | 9.755693316 | 8.945103118 | 9.451423937 | 9.033697602 |
| NAPG     | 8.18812077  | 8.218758081 | 8.602129354 | 8.80561788  | 8.461965168 | 9.186662537 | 8.71537038  | 8.488226438 | 9.734808137 | 9.08675297  | 9.260388852 | 8.599666621 | 9.105156595 | 8.571937855 | 9.452129181 | 9.043698557 | 9.421404435 | 9.313482423 |
| RHSDM4   | 9.142715987 | 9.029817469 | 9.105893895 | 8.800570698 | 9.372690187 | 8.075826526 | 8.884903228 | 9.230106666 | 8.768742433 | 8.981826329 | 8.887106966 | 9.271966616 | 8.327711714 | 8.326052632 | 9.099373452 | 8.571104803 | 8.910180137 | 8.910180137 |
| RBMA2    | 9.03502475  | 8.824394728 | 9.824386214 | 9.14117501  | 9.842073218 | 9.931566664 | 9.178432366 | 8.613273203 | 8.825827111 | 8.830204951 | 9.989059692 | 8.674255559 | 9.851792284 | 9.312255474 | 8.487728098 | 8.06683456  | 9.949601394 | 9.086170346 |
| PRR7     | 8.932795819 | 8.263131209 | 7.966267908 | 8.12625588  | 8.916972011 | 8.964899776 | 9.151818894 | 8.777347631 | 9.00694541  | 9.00694541  | 9.144972409 | 8.593837948 | 9.472846216 | 9.206387892 | 8.822748777 | 8.051466839 | 8.9542166   | 9.053308101 |
| MKS      | 9.581702655 | 9.336489416 | 8.79692676  | 9.38513562  | 9.338534752 | 9.338534752 | 8.867809923 | 8.501367862 | 8.92892504  | 8.650964592 | 8.884893685 | 9.796373871 | 8.127323665 | 9.428794631 | 8.51712212  | 9.358786295 | 8.402061725 | 8.952192505 |
| FTS1     | 9.02720394  | 9.05064095  | 7.812322355 | 7.775784115 | 8.454087075 | 9.139056666 | 9.078205719 | 9.409699963 | 8.823899442 | 8.823899442 | 9.320276216 | 8.844179951 | 8.592955181 | 9.156286997 | 9.188535312 | 8.96881876  | 8.731975511 | 8.71814     |
| PAAF1    | 9.029239062 | 8.376830454 | 9.210758678 | 7.352283264 | 8.935106611 | 9.523424411 | 9.390215797 | 8.326848699 | 9.100731845 | 8.74407765  | 8.748914264 | 9.798289454 | 9.236765906 | 9.365669079 | 9.02114067  | 8.721165171 | 8.958252004 | 8.958252004 |
| SP12     | 7.952447972 | 8.980772263 | 7.952732384 | 9.239008649 | 8.269854228 | 8.372845276 | 8.900052122 | 8.986099565 | 8.345445095 | 9.370411856 | 8.426583411 | 7.959560081 | 9.689897608 | 8.945134251 | 9.298875261 | 9.943387927 | 8.95941535  | 9.03079147  |
| AFG1     | 8.250133178 | 9.02966517  | 8.603565596 | 9.29866517  | 9.07918087  | 8.947581278 | 9.32357166  | 8.494043804 | 8.91017833  | 9.085816786 | 9.545821373 | 9.840716267 | 9.863995949 | 8.877920983 | 9.517959622 | 8.761289286 | 8.115545077 | 8.115545077 |
| GALK1    | 8.862256916 | 9.409099979 | 8.868664145 | 8.87866775  | 9.339777026 | 9.583561551 | 8.761146884 | 8.755625263 | 9.007800062 | 8.84848112  | 8.78739447  | 9.501438251 | 9.476448708 | 9.994369335 | 8.505184756 | 9.280277322 | 9.04588988  | 8.451762774 |
| CR2      | 8.984375846 | 9.568870144 | 9.131002858 | 8.542212012 | 9.168217528 | 9.82906902  | 9.064202252 | 8.835903102 | 8.932630041 | 8.964791839 | 8.876557131 | 9.83472681  | 9.711171904 | 8.120517192 | 8.993718283 | 9.953795381 | 9.02199584  | 9.02199584  |
| NLE1     | 9.113804976 | 8.928142238 | 9.527757369 | 8.74787453  | 9.47533642  | 8.78331112  | 9.054985407 | 8.617804056 | 9.035144521 | 8.822980444 | 8.76717283  | 9.752442684 | 8.64406995  | 8.977781371 | 9.57964661  | 8.73684842  | 9.038407197 | 8.74786269  |
| CDK7     | 9.054043447 | 8.598854256 | 8.217373131 | 8.598854256 | 9.280488477 | 8.907274272 | 7.877074282 | 8.287326327 | 8.756546106 | 8.64118075  | 8.776128349 | 9.270649989 | 9.350640495 | 8.957685471 | 9.421873869 | 9.79066062  | 9.04580111  | 9.114049037 |
| AF4      | 8.740612786 | 8.620536438 | 8.311899234 | 8.90737389  | 8.63292683  | 8.332529065 | 9.463488632 | 9.23139457  | 8.858108753 | 9.419808868 | 8.988243192 | 7.659655424 | 9.873571559 | 9.546499599 | 9.2992904   | 9.210402638 | 9.303760286 | 8.64171341  |
| RAB3D    | 9.301814097 | 8.794852633 | 8.794852633 | 8.945858963 | 9.61891781  | 8.769439357 | 8.955217259 | 8.97929642  | 9.00897609  | 8.85252446  | 9.24322931  | 9.331606636 | 8.781612954 | 9.988259886 | 8.53204886  | 8.51538766  | 8.70616369  | 8.70616369  |
| CNT2     | 9.264169059 | 8.25965761  | 8.212537653 | 8.84879518  | 8.681620937 | 8.207803524 | 9.056261759 | 8.747114897 | 8.923598435 | 9.13712828  | 8.288010082 | 8.377505597 | 9.178718811 | 9.046579784 | 9.980450294 | 9.143895479 | 9.037160141 | 9.314565447 |
| ARHGAP12 | 9.424224135 | 7.787806115 | 9.997000481 | 9.242816319 | 8.606287311 | 8.606287311 | 8.606298254 | 8.544648583 | 9.129187191 | 8.857893304 | 8.68093468  | 9.220075176 | 9.161948161 | 9.134671786 | 8.729704445 | 9.165043827 | 8.82506334  | 9.954544447 |
| FBXO11   | 9.428892528 | 9.092383174 | 6.660059901 | 8.752738839 | 8.814794781 | 8.412710333 | 9.224810076 | 9.16235091  | 8.481193872 | 8.795920958 | 8.66412438  | 9.044385343 | 8.803892406 | 9.058613669 | 9.977014948 | 8.99231994  | 9.065973472 | 9.065973472 |
| ARH10    | 9.98024625  | 9.85604244  | 8.951987883 | 9.037289253 | 9.748734028 | 8.951821566 | 9.731156179 | 8.79837468  | 8.798695869 | 8.850209625 | 9.796370287 | 9.50242302  | 9.24780575  | 8.756242179 | 8.763188886 | 9.376338419 | 8.763338419 | 8.763338419 |
| GPCR1    | 9.018779545 | 9.108723931 | 9.018779545 | 9.018779545 | 9.09560462  | 8.916703274 | 8.916703274 | 8.916703274 | 8.916703274 | 8.916703274 | 8.916703274 | 8.916703274 | 8.916703274 | 8.916703274 | 8.916703274 | 8.916703274 | 8.916703274 | 8.916703274 |
| SRD10    | 8.373810900 | 7.86055215  | 9.23728938  | 8.827044223 | 8.77217095  | 9.119587702 | 9.52995813  | 8.467617947 | 8.94064228  | 8.906834958 | 9.189827668 | 9.050023136 | 9.184710073 | 8.870180287 | 9.933074703 | 9.021714484 | 9.136946555 | 8.505427149 |
| UR1      | 9.267773909 | 9.149013847 | 9.092173613 | 9.149013847 | 9.157182238 | 8.449733802 | 9.137190715 | 8.449733802 | 9.137190715 | 8.449733802 | 9.137190715 | 8.449733802 | 9.137190715 | 8.449733802 | 9.137190715 | 8.449733802 | 9.137190715 | 8.449733802 |
| MADD     | 8.649916088 | 7.482671671 | 9.806762688 | 8.449223218 | 8.345926412 | 8.444027988 | 8.018593036 | 9.354240047 | 9.323843569 | 9.54527998  | 8.99180438  | 8.989602377 | 8.83340202  | 7.670743917 | 9.944131354 | 9.002153732 | 9.55315762  | 8.743180043 |
| AARS1D   | 9.120153994 | 9.082576294 | 8.994622984 | 8.581052362 | 8.446787171 | 9.165580649 | 8.89919527  | 8.89240354  | 8.788573632 | 9.180101396 | 8.89240354  | 8.788573632 | 9.269334658 | 9.180101396 | 8.636174587 | 8.488310573 | 9.136235488 | 9.136235488 |
| MRP56    | 9.119454907 | 8.356096134 | 9.375229584 | 8.728901024 | 9.027018121 | 8.20751054  | 8.29569449  | 9.952820662 | 8.86186723  | 9.314684128 | 9.314684128 | 9.505117456 | 8.843347514 | 9.010102458 | 9.56151359  | 9.038675876 | 8.854483848 | 8.448380064 |
| NN       | 8.782082527 | 9.843048883 | 9.347966051 | 8.711174943 | 8.922028616 | 7.93370216  | 8.948911866 | 9.322448068 | 9.56779617  | 8.844474934 | 9.192592265 | 8.983370216 | 9.038738373 | 8.756504923 | 9.377025402 | 9.435786818 | 9.02329333  | 8.439797806 |
| CDKN2E3  | 8.695758427 | 8.37287188  | 8.188196623 | 8.188196623 | 7.41079968  | 7.40524131  | 8.927147812 | 8.640384864 | 9.087594818 | 9.087594818 | 9.087594818 | 9.08759481  |             |             |             |             |             |             |

|          |             |             |             |             |             |             |             |             |             |             |             |             |             |             |             |             |             |             |
|----------|-------------|-------------|-------------|-------------|-------------|-------------|-------------|-------------|-------------|-------------|-------------|-------------|-------------|-------------|-------------|-------------|-------------|-------------|
| PPRC1    | 8.643457032 | 8.534468356 | 8.38311011  | 9.312160856 | 7.79647366  | 9.037300695 | 7.966931626 | 9.423233985 | 9.017385749 | 8.26265035  | 9.296027322 | 9.422703009 | 8.907115664 | 8.757010886 | 9.390712484 | 9.324796852 | 8.745344204 | 9.617318212 |
| EXOC3    | 8.594727401 | 8.547902719 | 8.81642681  | 9.282297855 | 9.795814447 | 9.795814447 | 9.179841447 | 8.673463451 | 8.72977438  | 9.956832618 | 9.11726615  | 8.765784051 | 8.515062908 | 9.561181    | 8.923376364 | 9.01139699  | 9.258478952 | 8.814138578 |
| HELZ     | 8.124632725 | 8.507601155 | 7.056109259 | 5.972784943 | 9.03707847  | 7.255057299 | 9.551405088 | 9.495631822 | 8.802029953 | 9.002043938 | 9.102553603 | 9.488846437 | 8.435620917 | 9.702379463 | 9.414641145 | 9.704616659 | 9.873533637 |             |
| TAB2     | 8.950574177 | 8.12404015  | 8.889221175 | 9.261000036 | 9.245014905 | 8.87361144  | 9.020622032 | 8.799325663 | 8.41076073  | 9.017919726 | 8.637241294 | 9.009874582 | 7.622936601 | 9.330388844 | 9.159739343 | 8.849096102 | 8.932347962 | 8.381794257 |
| FAM1441  | 8.755280289 | 8.856050883 | 8.98311373  | 8.85265083  | 8.98323675  | 8.626614938 | 8.98323675  | 9.08814454  | 8.580929078 | 8.580929078 | 8.68647039  | 8.786471928 | 8.39730735  | 8.703051682 | 8.39730735  | 8.703051682 | 9.035130169 | 8.703051682 |
| FAM5DA   | 8.937068938 | 9.327715455 | 8.907806932 | 9.060941519 | 7.74637866  | 8.410218271 | 9.018552271 | 9.018552271 | 8.645848123 | 9.755046142 | 8.654812311 | 8.403137463 | 8.61625762  | 9.286975217 | 8.539236802 | 8.912326802 | 9.498639241 |             |
| BABZ     | 9.442224004 | 8.71580031  | 8.428006601 | 8.399204335 | 9.06714299  | 8.880855276 | 9.550767531 | 9.253082114 | 9.311935598 | 8.928542192 | 9.314595902 | 8.810175124 | 8.609201177 | 7.960024072 | 8.418374965 | 9.158520599 | 9.23717248  | 8.66687505  |
| NU8R     | 9.336066314 | 9.384910119 | 8.990769799 | 8.58145529  | 9.156389297 | 9.181711037 | 8.597034532 | 9.62148481  | 9.96668375  | 8.732440275 | 8.732440275 | 8.732440275 | 8.732440275 | 8.732440275 | 8.732440275 | 8.732440275 | 8.732440275 | 8.732440275 |
| ALAD     | 8.923679275 | 9.386029278 | 9.146314475 | 8.842660592 | 8.691743169 | 7.431766148 | 8.200216696 | 9.948057864 | 8.89017308  | 9.270174382 | 8.675069572 | 8.839919663 | 7.202167405 | 9.647866093 | 9.077457209 | 8.93788726  | 8.85217031  | 8.32576903  |
| LEM02    | 8.903703928 | 9.587527269 | 9.118704958 | 8.65560465  | 9.09681621  | 9.09681621  | 9.09681621  | 8.82570465  | 8.949012913 | 9.143829194 | 9.017309091 | 7.527586887 | 9.020314666 | 9.931022327 | 8.657326477 | 8.54318242  | 8.9046591   |             |
| UMH2     | 9.417821139 | 9.018620113 | 9.185194255 | 8.656560465 | 8.800975677 | 8.857856319 | 9.085828819 | 8.864020406 | 9.800729213 | 9.021229127 | 8.76241199  | 9.11420171  | 9.234528819 | 9.74653111  | 8.863171831 | 9.75262319  | 8.83711835  | 8.76471835  |
| HBR3     | 8.977766225 | 8.211702102 | 8.906160937 | 8.839775539 | 8.566606888 | 8.469396998 | 8.759256206 | 9.969946657 | 8.721462824 | 9.25615899  | 8.668240123 | 8.842357191 | 9.372451862 | 9.165467977 | 9.561820022 | 9.106858696 | 9.025440639 | 9.78732489  |
| MTM8A    | 9.137065989 | 9.45489421  | 8.522718034 | 8.522718034 | 7.397499093 | 8.513380869 | 8.54790854  | 9.308275157 | 9.195185116 | 9.158071202 | 8.69527265  | 9.168828822 | 8.259896786 | 9.021320691 | 8.995959988 | 8.798934831 | 9.338895438 |             |
| FOXO1    | 8.883398379 | 9.32445125  | 7.58657077  | 8.902193765 | 8.677559474 | 9.345113009 | 8.799710102 | 9.518657843 | 9.372000488 | 8.881890801 | 9.855133192 | 7.649478002 | 8.30456077  | 9.021469634 | 8.90990467  | 9.305839482 | 9.277652005 | 9.104027728 |
| ABRACL   | 9.544509308 | 9.17899507  | 9.107959574 | 9.567462754 | 9.107457422 | 9.107457422 | 9.107457422 | 9.456833432 | 8.850477911 | 9.451566175 | 8.951178235 | 8.95596893  | 8.79659507  | 8.038345674 | 8.05845052  | 8.74756488  | 8.424303241 | 9.08278943  |
| MFS0D    | 8.775706926 | 9.067818669 | 8.804076848 | 8.889776007 | 8.532306634 | 8.967450253 | 9.268035004 | 8.91990122  | 8.12198557  | 8.62267102  | 8.020925887 | 9.316483599 | 7.457068001 | 9.162747383 | 8.970384226 | 8.92047637  | 9.010072265 | 8.999321394 |
| GPZT     | 9.147314094 | 9.586866711 | 9.369084069 | 8.856271123 | 7.49836062  | 9.334447809 | 8.732640051 | 8.856385633 | 9.237561556 | 8.787297327 | 9.418528373 | 8.176002355 | 8.814671996 | 9.108124827 | 8.563223676 | 8.532315506 | 8.535848278 |             |
| SIC43A2  | 9.789292758 | 9.363741572 | 9.390589841 | 8.432927747 | 8.80614666  | 9.248989816 | 8.639078319 | 8.749727153 | 8.565917551 | 8.655659911 | 9.065143574 | 9.936912148 | 9.009959533 | 9.83782883  | 8.495608525 | 8.835271005 | 8.329808485 |             |
| LAMTOR2  | 9.041504293 | 9.378563442 | 9.363367803 | 8.81946638  | 9.021461952 | 9.03438063  | 9.03145917  | 8.690476114 | 8.830619553 | 8.590904259 | 9.920375149 | 8.989084756 | 9.379709581 | 8.646685129 | 8.554655417 | 8.476740957 | 8.868912642 |             |
| FJA1     | 9.417911365 | 9.379386695 | 8.801039183 | 8.97182344  | 9.303752255 | 9.579483264 | 8.648870461 | 8.602293318 | 9.289897716 | 8.63374452  | 9.040487796 | 9.610948843 | 9.346537076 | 6.259841644 | 8.613606959 | 8.248667348 | 8.628891873 |             |
| UDR8     | 8.664212575 | 9.224256446 | 8.888532378 | 8.797936798 | 9.164025344 | 9.517514045 | 9.110657723 | 8.626344849 | 8.76057086  | 9.083494004 | 8.76057086  | 9.083494004 | 8.76057086  | 9.083494004 | 8.76057086  | 9.083494004 | 8.76057086  | 9.083494004 |
| CDCD130  | 8.95816271  | 9.328782075 | 9.638952805 | 9.114316933 | 9.295630615 | 9.77616025  | 8.864847484 | 8.777831241 | 8.677314832 | 9.374677304 | 8.108350606 | 9.499398893 | 9.080039292 | 8.578617615 | 8.846552763 | 9.145396275 | 9.045196275 |             |
| IO07     | 7.901042611 | 8.204255937 | 8.475600018 | 8.937670056 | 9.065724329 | 8.142977911 | 8.679344822 | 9.279554666 | 9.296686996 | 9.281574984 | 9.202638551 | 8.434813909 | 8.268707608 | 8.865644472 | 8.830826845 | 9.090415709 | 9.012962499 | 9.8611265   |
| FOXJ3    | 9.810638799 | 8.470722821 | 9.725537976 | 9.100880133 | 9.011880133 | 8.771002634 | 8.880549755 | 9.260639292 | 9.003888335 | 9.006496649 | 9.336920888 | 7.795892352 | 8.370829695 | 7.839663523 | 9.922255834 | 9.074467325 | 9.545713588 | 8.979234828 |
| EPB414A  | 8.882581283 | 9.709686379 | 8.859626027 | 7.056149811 | 9.204607923 | 9.84357116  | 9.248566715 | 9.104368125 | 9.247312039 | 9.09945502  | 7.85419734  | 8.172622366 | 9.93424879  | 8.955795278 | 9.171262586 | 8.784031278 | 8.644314282 |             |
| FAM168B  | 9.396416025 | 9.82784015  | 8.532483086 | 9.024109145 | 9.167224895 | 8.81968815  | 9.194260523 | 9.139604311 | 9.998815492 | 9.966013905 | 8.138050034 | 8.337642492 | 8.836211974 | 9.938549566 | 9.208325011 | 8.862955033 | 8.785625588 |             |
| CDX15    | 9.216985784 | 9.026266355 | 9.033778026 | 8.874352761 | 9.142016587 | 8.491056277 | 8.396985971 | 7.705678861 | 8.848409586 | 8.677001092 | 9.055642528 | 9.104826467 | 9.250864253 | 8.585892761 | 9.90346068  | 8.89733351  | 8.870988127 | 9.05171697  |
| FAM11FP5 | 8.973282829 | 8.973282829 | 8.973282829 | 8.973282829 | 8.973282829 | 8.973282829 | 8.973282829 | 8.973282829 | 8.973282829 | 8.973282829 | 8.973282829 | 8.973282829 | 8.973282829 | 8.973282829 | 8.973282829 | 8.973282829 | 8.973282829 | 8.973282829 |
| T0B1     | 8.882185159 | 9.021236002 | 8.923362727 | 8.787808906 | 8.807421167 | 8.874014032 | 9.129242966 | 8.893232807 | 8.893232807 | 9.015401991 | 9.025719462 | 8.936205616 | 9.102441617 | 9.003208969 | 9.314073568 | 8.647956211 | 8.876029313 | 9.045750811 |
| VALL     | 8.992574761 | 9.513066821 | 9.085240047 | 9.262671886 | 9.14975463  | 9.050485547 | 8.656128246 | 8.770005538 | 8.940623886 | 8.85778769  | 8.718138669 | 8.817060418 | 9.079309622 | 8.635226463 | 8.79437345  | 8.774545895 | 8.665070568 | 9.74126855  |
| MAPAK3   | 8.248327362 | 9.353454003 | 7.625742259 | 9.085405803 | 7.962580083 | 8.698344049 | 8.850637486 | 9.426165152 | 8.915250721 | 8.961720683 | 8.894168814 | 8.900281114 | 8.072039787 | 9.613030465 | 9.258754688 | 9.36484158  | 9.976633757 |             |
| CENPC    | 9.013407399 | 9.101442319 | 9.101353174 | 8.508751065 | 8.080241116 | 8.677344086 | 8.205999449 | 9.14238005  | 8.507409728 | 9.021600231 | 8.368557277 | 9.008932138 | 8.887519703 | 8.297726738 | 9.366518002 | 9.875604733 | 8.906799047 | 8.86740249  |
| EXOC10   | 9.19822923  | 8.692238674 | 8.692238674 | 9.117597264 | 9.368805275 | 9.098448117 | 8.561660437 | 9.985682789 | 8.561660437 | 9.18724446  | 8.74372216  | 7.980993818 | 8.877008989 | 9.90561243  | 9.916975783 | 8.984061498 | 8.98181482  |             |
| ARMCC6   | 8.482800971 | 8.302717534 | 8.846173901 | 9.069997037 | 8.808370995 | 8.033470043 | 9.474436496 | 8.933106823 | 8.843765724 | 8.086272635 | 9.375336622 | 9.321394052 | 9.003681687 | 8.553232894 | 8.461076508 | 8.749095591 | 8.900305594 | 8.89047928  |
| TP3B1    | 9.531285736 | 9.034917346 | 8.795817346 | 9.123778023 | 8.577779721 | 7.927697888 | 8.344287717 | 8.936312564 | 8.821461878 | 8.309741332 | 8.984140738 | 8.821461878 | 8.984140738 | 8.821461878 | 8.984140738 | 8.821461878 | 8.984140738 | 8.821461878 |
| SIC39A13 | 8.875985889 | 8.875985889 | 8.875985889 | 8.875985889 | 8.875985889 | 8.875985889 | 8.875985889 | 8.875985889 | 8.875985889 | 8.875985889 | 8.875985889 | 8.875985889 | 8.875985889 | 8.875985889 | 8.875985889 | 8.875985889 | 8.875985889 | 8.875985889 |
| NFKB1    | 6.998946548 | 7.919082239 | 7.919082239 | 7.919082239 | 7.919082239 | 7.919082239 | 7.919082239 | 7.919082239 | 7.919082239 | 7.919082239 | 7.919082239 | 7.919082239 | 7.919082239 | 7.919082239 | 7.919082239 | 7.919082239 | 7.919082239 | 7.919082239 |
| FURP3    | 8.941095017 | 9.623950527 | 8.82967561  | 9.001103148 | 8.82967561  | 8.452767797 | 8.807884507 | 8.856522266 | 8.886165577 | 9.21138997  | 8.882977263 | 8.737884878 | 9.30249185  | 8.961266063 | 8.937711477 | 9.21555919  | 8.895025329 | 8.980493469 |
| PRADCI   | 8.576703693 | 9.163005497 | 8.746101055 | 9.141540588 | 9.139942443 | 9.163957966 | 9.59402222  | 8.711935844 | 8.859920104 | 8.32926893  | 9.146946535 | 9.017412341 | 9.745898568 | 8.780096664 | 8.443302539 | 8.334638407 | 8.675915642 | 9.282565009 |
| EPCI     | 9.492199159 | 9.635311104 | 9.635311104 | 9.635311104 | 9.635311104 | 9.635311104 | 9.635311104 | 9.635311104 | 9.635311104 | 9.635311104 | 9.635311104 | 9.635311104 | 9.635311104 | 9.635311104 | 9.635311104 | 9.635311104 | 9.635311104 | 9.635311104 |
| VAR52    | 9.18785113  | 8.854809325 | 8.854809325 | 8.854809325 | 8.854809325 | 8.854809325 | 8.854809325 | 8.854809325 | 8.854809325 | 8.854809325 | 8.854809325 | 8.854809325 | 8.854809325 | 8.854809325 | 8.854809325 | 8.854809325 | 8.854809325 | 8.854809325 |
| CPM02D   | 9.49580189  | 9.63551779  | 9.136928896 | 8.628970134 | 9.13093351  | 9.14063059  | 8.702266055 | 8.880147806 | 9.993580354 | 8.60347332  | 8.81170581  | 8.721751933 | 8.497576037 | 9.20023855  | 8.895620849 | 9.026731301 | 8.8         |             |

|           |              |             |             |              |             |             |             |             |             |             |             |             |             |             |             |             |             |             |
|-----------|--------------|-------------|-------------|--------------|-------------|-------------|-------------|-------------|-------------|-------------|-------------|-------------|-------------|-------------|-------------|-------------|-------------|-------------|
| CHORDC1   | 9.23383167   | 6.97010918  | 8.45970346  | 9.36573044   | 7.62666541  | 9.36408862  | 8.09659079  | 9.37412667  | 8.81610942  | 8.72921048  | 8.92729535  | 8.19277222  | 9.16397227  | 8.640782309 | 9.51722573  | 8.665983471 | 9.132536336 | 9.105698215 |
| Cbor33    | 9.13952329   | 9.063224463 | 8.555278913 | 8.923647384  | 8.54356629  | 9.288530722 | 8.81908713  | 8.56827789  | 8.96151832  | 8.417864288 | 8.48547846  | 9.25078496  | 9.161496721 | 9.145633662 | 8.65189086  | 9.95837274  | 8.45865662  | 8.93051893  |
| POLDP3    | 8.694047018  | 8.75258365  | 8.93885248  | 8.907051645  | 8.98705429  | 8.981841019 | 9.030246193 | 8.86585454  | 8.95117848  | 8.63707624  | 8.87478461  | 8.459173576 | 8.456782519 | 8.992490363 | 8.877128013 | 8.718651007 | 8.60426777  | 9.37145964  |
| Cl1orH8   | 8.853045575  | 9.159551267 | 8.950058968 | 9.147206982  | 8.889991593 | 9.362687187 | 8.969050087 | 8.199198525 | 8.373393994 | 8.312245948 | 8.351596783 | 8.986176483 | 9.246889388 | 9.423495556 | 8.239001546 | 8.370565186 | 8.396026841 | 8.869425267 |
| THADA     | 8.934510815  | 8.943034763 | 8.943034763 | 8.943034763  | 8.943034763 | 8.943034763 | 8.943034763 | 8.943034763 | 8.943034763 | 8.943034763 | 8.943034763 | 8.943034763 | 8.943034763 | 8.943034763 | 8.943034763 | 8.943034763 | 8.943034763 | 8.943034763 |
| NETL5     | 8.1948923491 | 8.920948193 | 8.824862668 | 8.910697526  | 8.809916735 | 8.942965854 | 8.976026622 | 8.905202369 | 8.84669709  | 8.869818139 | 8.860193562 | 8.880193562 | 8.744252601 | 8.88210946  | 8.880004391 | 8.823260011 | 8.78524679  | 8.825326011 |
| PP1R14B   | 9.005107873  | 9.60555312  | 8.503543905 | 9.490005455  | 9.274746031 | 8.867532295 | 9.227368680 | 8.742005829 | 8.69218175  | 8.62580775  | 8.827289703 | 8.935424101 | 9.190749828 | 9.029875483 | 8.827306443 | 8.250131216 | 8.440795491 | 8.836095762 |
| MKRNZ     | 9.006263686  | 8.880805744 | 9.515497964 | 9.28449365   | 9.29439465  | 8.436829377 | 8.691160963 | 8.456668727 | 8.52813784  | 8.51176012  | 8.192411703 | 9.109568605 | 9.405584935 | 8.876738536 | 9.06783644  | 8.676867167 | 8.40174638  | 8.869425267 |
| R11-812E1 | 8.329642413  | 10.02186743 | 7.901405455 | 6.930705403  | 8.897220004 | 4.989882411 | 9.360733468 | 9.030659582 | 8.841537847 | 9.362534444 | 9.576043904 | 4.65886719  | 9.02665366  | 7.177091008 | 12.6653546  | 4.279730746 | 8.572028253 | 4.978322124 |
| EGLNZ     | 8.703452345  | 8.382321745 | 8.716189647 | 9.1084718894 | 9.17873514  | 8.873495992 | 9.413151119 | 8.816636933 | 8.904292973 | 9.128392807 | 8.181668936 | 9.116768825 | 8.477600793 | 9.116734444 | 9.059858246 | 8.917559733 | 8.86375262  | 8.869425267 |
| KIF13B    | 8.897057185  | 9.347974577 | 8.313149432 | 8.577740889  | 8.923145603 | 9.030913941 | 9.391292949 | 9.748802244 | 8.81431764  | 8.59953113  | 8.848666512 | 8.899400449 | 9.633070471 | 8.821454382 | 8.779030628 | 8.705294706 | 9.133299027 | 9.166652008 |
| OSPB      | 8.62371848   | 8.118651388 | 8.470811927 | 7.9871159    | 7.803666317 | 8.701241529 | 9.31601881  | 9.104336603 | 8.98199069  | 8.45580082  | 9.4253307   | 8.65670793  | 8.86249091  | 9.28437166  | 8.873784325 | 9.01459519  |             |             |
| GALT      | 8.88056682   | 8.962453474 | 8.496973616 | 8.855384728  | 8.779104231 | 9.006759658 | 9.429829579 | 8.589092475 | 8.227092625 | 8.650265929 | 8.628305798 | 9.698369319 | 9.332565798 | 8.774434564 | 8.97814617  | 9.095282264 | 9.035230569 | 9.904534735 |
| PIGP      | 8.890260583  | 8.890260583 | 8.907614894 | 8.902835659  | 9.20593572  | 8.510983039 | 8.959636493 | 8.546164078 | 9.010979101 | 8.261299239 | 8.708615461 | 9.479848752 | 9.022504952 | 8.70869365  | 8.690488231 | 9.032736497 | 8.585656647 | 8.692165355 |
| LSM       | 8.588466513  | 9.198394195 | 8.615032319 | 9.036635085  | 9.331448322 | 9.018336091 | 9.900706213 | 8.834125096 | 9.96445821  | 8.776814816 | 8.788196434 | 8.747325207 | 9.29461119  | 7.965705373 | 8.435626735 | 9.110056128 | 9.059473719 | 8.105979396 |
| CRV2      | 9.267103384  | 8.861835456 | 7.842838458 | 8.774673465  | 8.62931205  | 8.727739791 | 8.951133111 | 9.076991256 | 9.709652082 | 7.620208203 | 8.162440081 | 8.162440081 | 9.02531022  | 9.42359472  | 8.804874758 | 9.568883376 |             |             |
| COMMD7    | 9.759374029  | 9.320299951 | 8.938215109 | 9.320299951  | 9.320299951 | 9.320299951 | 9.320299951 | 9.320299951 | 9.320299951 | 9.320299951 | 9.320299951 | 9.320299951 | 9.320299951 | 9.320299951 | 9.320299951 | 9.320299951 | 9.320299951 | 9.320299951 |
| LIMS1     | 7.842619234  | 8.201454342 | 8.65979734  | 8.65979734   | 8.65979734  | 8.65979734  | 8.65979734  | 8.65979734  | 8.65979734  | 8.65979734  | 8.65979734  | 8.65979734  | 8.65979734  | 8.65979734  | 8.65979734  | 8.65979734  | 8.65979734  | 8.65979734  |
| MHCH      | 9.017878058  | 8.857508089 | 7.624877518 | 8.455480237  | 8.455480237 | 8.455480237 | 8.455480237 | 8.455480237 | 8.455480237 | 8.455480237 | 8.455480237 | 8.455480237 | 8.455480237 | 8.455480237 | 8.455480237 | 8.455480237 | 8.455480237 | 8.455480237 |
| NIDC3     | 9.315967515  | 9.102770034 | 9.307740753 | 8.85118574   | 8.588072133 | 8.85212653  | 8.36613228  | 8.77720393  | 8.51734543  | 8.77720393  | 8.51734543  | 8.77720393  | 8.51734543  | 8.77720393  | 8.51734543  | 8.77720393  | 8.51734543  | 8.77720393  |
| XPO1      | 9.007058958  | 8.786102078 | 9.016808769 | 9.487274918  | 8.71132961  | 8.268934444 | 8.769802747 | 8.769802747 | 8.769802747 | 8.769802747 | 8.769802747 | 8.769802747 | 8.769802747 | 8.769802747 | 8.769802747 | 8.769802747 | 8.769802747 | 8.769802747 |
| RABGGTA   | 8.473522992  | 8.95191183  | 9.105280873 | 9.17176922   | 8.522252952 | 9.347084412 | 8.590094114 | 8.828759963 | 8.5898959   | 8.724859352 | 8.880966317 | 9.307547309 | 9.122704259 | 8.826553515 | 8.780282538 | 8.396928532 | 9.03045041  | 8.59619785  |
| TMCO4     | 9.090208752  | 8.645871253 | 9.01976057  | 8.939616191  | 9.01976057  | 8.939616191 | 9.01976057  | 8.939616191 | 9.01976057  | 8.939616191 | 9.01976057  | 8.939616191 | 9.01976057  | 8.939616191 | 9.01976057  | 8.939616191 | 9.01976057  | 8.939616191 |
| TYW1      | 8.899405419  | 8.350435418 | 9.350435418 | 9.350435418  | 9.350435418 | 9.350435418 | 9.350435418 | 9.350435418 | 9.350435418 | 9.350435418 | 9.350435418 | 9.350435418 | 9.350435418 | 9.350435418 | 9.350435418 | 9.350435418 | 9.350435418 | 9.350435418 |
| ALYRF     | 9.20223466   | 8.179293697 | 8.78100977  | 8.78100977   | 8.78100977  | 8.78100977  | 8.78100977  | 8.78100977  | 8.78100977  | 8.78100977  | 8.78100977  | 8.78100977  | 8.78100977  | 8.78100977  | 8.78100977  | 8.78100977  | 8.78100977  | 8.78100977  |
| ZNF63     | 9.059603738  | 9.167767393 | 8.838719429 | 8.834708779  | 9.171762772 | 8.98804286  | 8.71958806  | 8.518412138 | 8.89475568  | 8.279207985 | 8.71343272  | 9.618917372 | 9.129183377 | 8.68305376  | 9.192997983 | 8.846057983 | 9.192997983 | 8.846057983 |
| MS154     | 9.043004368  | 8.95019237  | 9.732444719 | 9.31169914   | 8.732444719 | 9.31169914  | 8.732444719 | 9.31169914  | 8.732444719 | 9.31169914  | 8.732444719 | 9.31169914  | 8.732444719 | 9.31169914  | 8.732444719 | 9.31169914  | 8.732444719 | 9.31169914  |
| BLZ11     | 8.20786404   | 9.12783185  | 7.741211428 | 9.036769489  | 8.936114226 | 8.985404286 | 8.972870846 | 8.96109867  | 8.645482373 | 8.640890398 | 8.662138767 | 9.564230362 | 9.298479769 | 8.785371569 | 8.954786628 | 8.75492243  | 8.613614417 | 8.724532867 |
| PSCP1     | 9.380458607  | 9.220710353 | 9.046959229 | 9.220710353  | 9.046959229 | 9.220710353 | 9.046959229 | 9.220710353 | 9.046959229 | 9.220710353 | 9.046959229 | 9.220710353 | 9.046959229 | 9.220710353 | 9.046959229 | 9.220710353 | 9.046959229 | 9.220710353 |
| HACL1     | 8.672825135  | 8.85461547  | 8.890284513 | 8.781013694  | 9.101172259 | 8.198482031 | 8.423165195 | 9.008413153 | 9.00556607  | 8.799880218 | 8.673994671 | 9.141524788 | 8.561662124 | 8.705294127 | 9.197542719 | 8.977919567 | 8.865758842 | 9.101094987 |
| COROB1    | 9.202351697  | 8.45826604  | 8.969160865 | 8.45826604   | 8.969160865 | 8.45826604  | 8.969160865 | 8.45826604  | 8.969160865 | 8.45826604  | 8.969160865 | 8.45826604  | 8.969160865 | 8.45826604  | 8.969160865 | 8.45826604  | 8.969160865 | 8.45826604  |
| TGBR2     | 8.765825169  | 9.311302814 | 9.171105777 | 9.537143188  | 8.731923186 | 8.271600845 | 8.719724543 | 8.648047118 | 9.849781376 | 8.880190179 | 9.510010109 | 8.759919533 | 9.391812401 | 8.168068357 | 8.839635576 | 9.225466001 | 8.072289033 | 8.495399093 |
| PALC4PB   | 9.049616311  | 8.854619221 | 8.854619221 | 8.854619221  | 8.854619221 | 8.854619221 | 8.854619221 | 8.854619221 | 8.854619221 | 8.854619221 | 8.854619221 | 8.854619221 | 8.854619221 | 8.854619221 | 8.854619221 | 8.854619221 | 8.854619221 | 8.854619221 |
| FBXL1     | 8.82725416   | 9.079865106 | 8.724796874 | 8.724796874  | 8.724796874 | 8.724796874 | 8.724796874 | 8.724796874 | 8.724796874 | 8.724796874 | 8.724796874 | 8.724796874 | 8.724796874 | 8.724796874 | 8.724796874 | 8.724796874 | 8.724796874 | 8.724796874 |
| MZT2A     | 8.352442045  | 8.939435606 | 9.113884809 | 9.08139311   | 9.011538131 | 8.741055235 | 9.111657324 | 8.532592884 | 9.062711096 | 8.549465512 | 8.810127081 | 9.027878778 | 9.885282367 | 8.164953704 | 8.24434852  | 8.837680824 | 8.62360126  | 9.0090635   |
| FAM5A     | 9.055252811  | 8.38110053  | 8.985480382 | 9.10670518   | 8.740162139 | 9.90866557  | 8.805147839 | 8.865882672 | 9.028766222 | 8.155028278 | 9.139581442 | 6.423189017 | 8.797858511 | 9.05707885  | 8.976201204 | 9.074386287 |             |             |
| EXOSC6    | 9.027307088  | 8.234149523 | 9.27836219  | 9.220739657  | 9.013801629 | 8.356088763 | 8.389056581 | 8.53923262  | 9.050430453 | 8.843694927 | 8.646217451 | 9.218542093 | 9.096881947 | 9.163313523 | 8.915040741 | 8.873518364 | 8.553864957 | 8.71397367  |
| DXD10     | 9.019728003  | 8.884041533 | 8.369316258 | 9.00826757   | 9.00826757  | 9.00826757  | 9.00826757  | 9.00826757  | 9.00826757  | 9.00826757  | 9.00826757  | 9.00826757  | 9.00826757  | 9.00826757  | 9.00826757  | 9.00826757  | 9.00826757  | 9.00826757  |
| LEPROT1   | 8.940114078  | 8.888287818 | 8.766241508 | 8.246646466  | 9.865211127 | 8.76017952  | 9.020870014 | 8.718431724 | 8.865675288 | 8.678872102 | 8.801284372 | 9.137388892 | 9.083866557 | 8.83966345  | 8.529494018 | 8.458544149 | 8.687448934 | 9.081843419 |
| EXOC2     | 9.150252529  | 8.567248396 | 9.002756994 | 8.286862004  | 9.1867374   | 8.73470761  | 9.085084948 | 8.251085574 | 8.757999761 | 8.565073463 | 8.958297929 | 8.05178531  | 8.402070775 | 8.860142784 | 8.996593233 | 8.960138231 | 8.734618212 | 8.869425267 |
| FAM13B    | 8.814502062  | 8.814502062 | 8.814502062 | 8.814502062  | 8.814502062 | 8.814502062 | 8.814502062 | 8.814502062 | 8.814502062 | 8.814502062 | 8.814502062 | 8.814502062 | 8.814502062 | 8.814502062 | 8.814502062 | 8.814502062 | 8.814502062 | 8.814502062 |
| TRAPCC2   | 8.78708353   | 9.18180984  | 9.105619016 | 9.05578387   | 9.19289386  | 9.422999945 | 9.3264802   | 8.61934255  | 9.98933669  | 8.600852871 | 8.952478116 | 8.832127550 | 9.403251259 | 9.207447448 | 8.55182838  | 8.820975098 | 8.51763     |             |

|           |             |             |             |             |             |             |             |             |             |             |              |             |             |             |             |             |             |             |
|-----------|-------------|-------------|-------------|-------------|-------------|-------------|-------------|-------------|-------------|-------------|--------------|-------------|-------------|-------------|-------------|-------------|-------------|-------------|
| FBX021    | 8.263167092 | 8.899677273 | 8.731777298 | 8.530298534 | 8.721163259 | 8.924051739 | 8.946316317 | 8.775690452 | 9.393948038 | 8.831260655 | 8.830666061  | 8.851135286 | 6.77087258  | 8.936748959 | 8.602003092 | 9.106702607 | 9.128958343 | 8.68063004  |
| ATXN17L3B | 9.686768078 | 9.17399916  | 8.021368215 | 8.26320326  | 9.217351929 | 8.717066543 | 8.980457475 | 8.955979061 | 8.863646019 | 8.731658791 | 8.705642946  | 8.322139693 | 8.912570604 | 6.306751217 | 9.980725638 | 9.062618826 | 8.201347821 | 8.798272093 |
| STXP3     | 8.835489016 | 8.494172063 | 7.787669827 | 8.893832026 | 8.517277171 | 8.811393783 | 9.123054578 | 8.286529464 | 8.832897275 | 8.654129945 | 8.70867069   | 9.02882275  | 8.80043334  | 8.947096653 | 8.39377663  | 8.631393779 | 8.835114449 |             |
| ZKSCAN1   | 8.816293403 | 8.409535601 | 9.18908735  | 9.57934206  | 8.772080517 | 7.01431902  | 8.667881375 | 9.356061301 | 8.844795037 | 8.973190509 | 9.34457142   | 8.976313575 | 7.200362665 | 8.643946767 | 9.095847633 | 8.874614546 | 8.720394942 | 8.950980818 |
| PFMPC2    | 9.21450799  | 9.07050183  | 8.15558416  | 9.00043243  | 8.719692604 | 8.61766209  | 8.795690769 | 8.848075338 | 8.795666299 | 8.786284239 | 9.00665642   | 7.931091528 | 8.113180436 | 9.045534666 | 8.754199007 | 8.38014554  | 8.406664659 |             |
| C19H48    | 9.177199554 | 9.04662539  | 8.17708663  | 9.117342625 | 8.32885995  | 8.909394808 | 8.887481401 | 8.61383239  | 8.871683239 | 8.495411957 | 8.978697541  | 9.019842323 | 7.880321361 | 8.765204531 | 8.842689977 | 8.605125593 | 8.777802344 | 8.901510507 |
| ANAP1CS   | 8.814903528 | 9.430324866 | 9.361240303 | 8.706429014 | 8.89252366  | 9.349898349 | 8.844189124 | 8.789110025 | 8.793872436 | 8.764694402 | 8.871330201  | 8.424859093 | 9.05388327  | 9.760345699 | 8.542840143 | 8.384578084 | 8.805122978 | 8.866520845 |
| BLZF1     | 9.43819659  | 8.45513936  | 9.944530293 | 9.291410212 | 8.180217167 | 8.884972439 | 8.574954041 | 8.574954041 | 8.85992119  | 8.485173153 | 8.580823126  | 8.946954446 | 6.70468098  | 8.71108463  | 9.176208021 | 8.931072256 | 8.731652284 | 8.92727845  |
| THAP5     | 9.38264519  | 9.480911793 | 8.328718184 | 9.093475691 | 9.178899191 | 8.452892698 | 7.911830358 | 8.474421605 | 9.440421166 | 8.932579061 | 8.734201496  | 9.985549029 | 9.133816318 | 8.170690991 | 8.294568111 | 9.200805308 | 8.665655401 | 8.386277266 |
| WRB       | 9.113032535 | 8.813704022 | 8.804058592 | 9.098989058 | 9.579898958 | 8.186624642 | 8.223835519 | 9.94049419  | 8.922806626 | 8.923110139 | 8.795263935  | 9.158326298 | 8.615789356 | 8.059853328 | 8.742985524 | 9.232652725 | 8.581482333 | 8.562929526 |
| HMGCR     | 8.759447003 | 8.693746003 | 9.500462008 | 8.90462008  | 8.220616003 | 8.63530927  | 8.332159296 | 8.604562008 | 9.024746533 | 9.263687003 | 9.182926484  | 8.229708822 | 7.296108608 | 9.131168301 | 8.897252087 | 9.376526252 | 8.028954875 | 8.790829298 |
| BLCL13    | 8.896971367 | 9.534341117 | 9.504740423 | 8.990094972 | 9.005704623 | 8.727491576 | 8.222910141 | 8.758446184 | 9.284049523 | 8.710015906 | 9.01552282   | 8.336304362 | 8.706650653 | 9.733611163 | 8.469435019 | 8.575890306 | 8.577391637 | 8.978561331 |
| ITFZ2     | 9.229085081 | 9.348824332 | 9.084122569 | 9.737214457 | 8.648537603 | 9.965382081 | 8.987405533 | 9.124082952 | 9.124082952 | 9.124082952 | 8.838478189  | 9.573603304 | 8.451464798 | 7.776995747 | 8.77637808  | 9.93040184  | 8.877822383 | 8.700143834 |
| HLTF      | 8.261130235 | 9.108168957 | 8.135087034 | 8.2873339   | 9.492274238 | 8.30885632  | 9.490103979 | 9.054038008 | 9.357078486 | 8.76380534  | 9.0218797    | 9.235841085 | 9.026474471 | 8.68445318  | 8.80919458  | 8.82963077  | 8.824835172 | 8.480106346 |
| GRP98B    | 8.862584248 | 9.21317922  | 9.805194877 | 9.086045653 | 7.678925919 | 8.300133017 | 8.442434154 | 8.56741916  | 8.65522046  | 9.008494757 | 8.729875906  | 9.078824957 | 8.780084975 | 8.790286329 | 9.029459123 | 9.105520371 | 9.077714234 | 8.932838922 |
| STK10     | 8.167606526 | 9.176068211 | 8.594130711 | 8.889652852 | 9.23445327  | 8.683473943 | 8.652195456 | 9.440246196 | 9.98220102  | 9.007325862 | 8.99402038   | 9.153795227 | 8.713308812 | 8.706644051 | 8.949794528 | 8.636414131 | 8.825766036 | 8.823446744 |
| ATP1A1    | 9.042269016 | 8.108051356 | 8.469208721 | 8.034788106 | 8.397615588 | 8.980695141 | 8.613611795 | 9.602932797 | 8.702797973 | 9.008181877 | 8.851680713  | 9.232808977 | 9.13769889  | 8.63363505  | 9.586149837 | 8.660291694 | 8.795607520 | 8.824999968 |
| TMEM218   | 9.677919279 | 9.338769174 | 8.674431869 | 9.98721075  | 9.823779328 | 9.70166526  | 8.84039313  | 8.714751714 | 8.803602019 | 8.60893705  | 8.78462394   | 9.38832793  | 9.941437383 | 9.164770406 | 8.429226075 | 9.127798326 | 8.80124504  | 8.77882407  |
| RPAIN     | 8.797374003 | 9.365874165 | 9.271054456 | 9.365874165 | 8.897754466 | 9.197096071 | 8.463220545 | 8.451914846 | 8.54502484  | 8.57705547  | 8.498621468  | 8.856977059 | 9.25229584  | 9.623083964 | 8.63785626  | 8.992761055 | 8.689654722 | 8.848395724 |
| ACAD8     | 8.446325257 | 9.101102647 | 9.350569999 | 8.302055863 | 8.528321598 | 6.04817977  | 9.156129977 | 9.917939884 | 8.378624676 | 8.78624676  | 8.463966418  | 8.584895234 | 9.054160357 | 7.70173038  | 9.311435532 | 8.727789813 | 9.140274429 | 9.102644748 |
| PCYT2     | 8.67231406  | 9.472325883 | 8.324437583 | 8.856023757 | 9.479437933 | 8.30298759  | 9.472241641 | 8.286916669 | 8.604034662 | 8.162853422 | 8.8207053    | 8.52329193  | 9.27487064  | 9.404142892 | 8.308364664 | 8.41083503  | 8.81248127  | 9.127393805 |
| SMAD5     | 7.894822148 | 9.852053797 | 7.801787642 | 8.559933335 | 8.90943576  | 8.60349771  | 9.154190339 | 8.884146813 | 8.38041739  | 9.009996184 | 9.127285662  | 8.150791229 | 9.210309378 | 7.301926143 | 9.048140337 | 8.543532215 | 9.017107064 | 9.583485274 |
| NUB1      | 8.224725008 | 8.806173491 | 8.832925564 | 9.552115793 | 9.004323253 | 8.449137533 | 8.712770698 | 8.8102767   | 9.063013504 | 8.86475399  | 8.359598152  | 8.981136289 | 8.901385899 | 8.048144355 | 8.648817296 | 9.101532152 | 8.459594027 | 9.039828375 |
| GPB5      | 9.337095384 | 8.814649799 | 9.139783384 | 9.195545529 | 9.05624287  | 8.579428133 | 8.828213582 | 8.101747525 | 8.375948213 | 8.376581835 | 8.74701487   | 9.407673693 | 7.911551692 | 9.02865634  | 9.015908239 | 9.186676956 | 9.134631009 | 9.051602426 |
| PNRC2     | 9.004192574 | 8.985366514 | 8.386938514 | 7.969437901 | 8.304471358 | 8.735931201 | 8.510866562 | 8.532269544 | 8.590043128 | 8.885151426 | 9.161642496  | 9.265899776 | 8.78453877  | 8.882584204 | 8.98594412  | 8.035731511 | 9.140756869 |             |
| NBPFF19   | 8.581059529 | 9.300029897 | 7.889414944 | 8.759989714 | 7.175771648 | 8.238856018 | 8.006183923 | 9.619869714 | 9.226565698 | 8.848652716 | 9.484900153  | 7.452530085 | 8.490955431 | 8.351512221 | 9.737619353 | 9.706100915 | 9.075499322 | 9.30438340  |
| SNAPC3    | 9.19246478  | 9.066396127 | 8.110016848 | 8.684930983 | 9.053383661 | 8.476599378 | 8.705473995 | 8.854453854 | 9.127006937 | 9.316318538 | 8.684385707  | 8.716216899 | 8.688782353 | 8.899218548 | 8.522051341 | 8.788100692 | 8.781533883 | 8.823721041 |
| PCPD2     | 8.910179812 | 8.72131406  | 8.737398256 | 8.410860541 | 8.72131406  | 8.410860541 | 8.72131406  | 8.410860541 | 8.72131406  | 8.410860541 | 8.920122115  | 8.712617535 | 8.552849535 | 7.557157333 | 8.674545155 | 8.865713375 | 8.865713375 | 8.865713375 |
| DSN1      | 8.906055554 | 9.071754007 | 8.866750059 | 9.60745461  | 8.103375957 | 8.775371927 | 8.936578126 | 9.78710923  | 8.984749023 | 8.696474023 | 8.984749023  | 8.666268971 | 8.814803589 | 9.145870492 | 8.825474598 | 8.692759015 | 8.865617621 | 8.734780174 |
| NOTCH2NL  | 7.392826572 | 7.55762794  | 8.447968476 | 9.695297007 | 9.69692133  | 9.034732094 | 8.691371745 | 9.630048619 | 8.861345207 | 8.9277211   | 8.82969479   | 9.039351146 | 8.30508168  | 7.094049726 | 8.924339928 | 8.745601678 | 9.228254425 | 8.810421575 |
| HIPK1     | 8.144369592 | 8.030654235 | 8.64444539  | 9.625946114 | 8.811848607 | 9.544585818 | 8.482117548 | 8.656570075 | 8.907463018 | 8.482117548 | 8.8159173    | 8.499387701 | 8.92973761  | 8.909198134 | 8.828253811 | 9.102428228 | 8.757087961 | 8.908293917 |
| IPK1      | 8.583338355 | 9.168754957 | 8.878370289 | 8.72811634  | 7.890083406 | 9.47551993  | 9.142844745 | 9.059492311 | 8.795838181 | 9.168804886 | 8.780025553  | 8.388586668 | 9.551896339 | 9.21166004  | 8.37273096  | 8.5270481   | 8.843746945 |             |
| SNRPB     | 8.583094737 | 8.976388373 | 9.151644614 | 9.184564087 | 9.447583586 | 9.67871873  | 9.08300721  | 8.258492286 | 8.710077846 | 8.674448827 | 8.661277026  | 8.797818507 | 9.012818184 | 8.280316921 | 8.367855464 | 8.246769211 | 8.437696211 | 8.437696211 |
| ZC3H6     | 8.85227527  | 8.786624257 | 8.92502527  | 8.273456841 | 9.910527692 | 8.979759983 | 8.136000488 | 8.750766403 | 9.295234222 | 8.45790052  | 8.945576669  | 9.499732337 | 8.174143499 | 7.335381581 | 8.602049438 | 8.906455967 | 8.73193267  | 8.416188247 |
| LCAL3     | 8.340598862 | 9.107192763 | 8.737398256 | 7.859509762 | 9.856691802 | 8.847632601 | 10.82839205 | 8.780796258 | 8.790704324 | 8.280796258 | 9.28016338   | 8.481148776 | 9.280696598 | 9.840161764 | 10.8672866  | 9.324416958 | 8.665176717 | 9.102414107 |
| POGK      | 8.172815732 | 8.320615732 | 8.737398256 | 8.737398256 | 8.737398256 | 8.737398256 | 8.737398256 | 8.737398256 | 8.737398256 | 8.737398256 | 8.9255307542 | 8.230765342 | 8.716285448 | 9.380084437 | 8.165244154 | 8.746289489 | 8.650091789 | 9.340613022 |
| LRCH4     | 9.06769302  | 9.33024158  | 8.451221891 | 8.089746512 | 8.92345657  | 9.10971383  | 8.837359706 | 8.79975898  | 8.663857302 | 8.524011705 | 8.747898679  | 9.133639224 | 8.587512593 | 8.726300918 | 8.894009071 | 8.838011853 | 8.87721389  | 8.765751339 |
| TRAPP1C2  | 8.17118028  | 9.354667821 | 8.727860254 | 9.354667821 | 8.860382672 | 8.430778408 | 9.109890837 | 8.98816744  | 8.764436937 | 8.773273337 | 8.81614494   | 9.088859973 | 8.99335671  | 8.670771177 | 8.746746894 | 8.912176375 | 9.097901765 | 8.936532189 |
| IFIH1     | 8.9416526   | 8.237216652 | 7.668801599 | 8.735274004 | 9.392577009 | 8.652866638 | 8.618396739 | 9.058295583 | 9.304284168 | 8.833519371 | 8.8470742    | 8.991031712 | 8.802402427 | 8.548481057 | 9.212800312 | 9.104198802 | 8.782321705 | 8.619425244 |
| CRTC2     | 9.164124588 | 9.59250562  | 8.268789259 | 8.268789259 | 8.52120991  | 8.991055033 | 8.66032265  | 8.489149313 | 8.91023213  | 8.940237493 | 8.300883111  | 8.626870943 | 9.46726756  | 9.15873148  | 8.79948386  | 8.83055881  | 9.139758466 |             |
| NECAP2    | 8.06512029  | 9.373019023 | 9.373019023 | 8.607680321 | 8.567819566 | 8.176139888 | 8.68719566  | 9.052373094 | 8.910294104 | 8.724816036 | 9.022739394  | 9.072952431 | 9.301804275 | 9.219949109 | 8.795494193 | 8.703246764 | 8.464247721 | 9.011221275 |
| CS3CB2    | 9.022651329 | 8.388640307 | 9.122943183 | 9.37438449  | 9.549740752 | 8.49963248  | 8.35425466  | 8.864400205 | 8.86476546  | 8.713508084 | 9.052210136  |             |             |             |             |             |             |             |

|          |             |             |             |             |             |             |              |              |             |             |             |             |             |             |             |             |             |             |
|----------|-------------|-------------|-------------|-------------|-------------|-------------|--------------|--------------|-------------|-------------|-------------|-------------|-------------|-------------|-------------|-------------|-------------|-------------|
| FIBP     | 9.095949663 | 9.824553767 | 8.43498658  | 8.912538458 | 9.06501765  | 8.513228141 | 8.69827635   | 8.48324432   | 8.851042765 | 8.390654315 | 8.732853981 | 9.146425779 | 9.433099002 | 9.334678086 | 8.487412493 | 8.705520698 | 8.539696191 | 8.928583617 |
| STR1P    | 8.101729408 | 9.04187591  | 8.921943742 | 8.082266482 | 9.46758434  | 8.237463334 | 9.123200737  | 8.908870227  | 8.349053632 | 8.792211047 | 8.54133579  | 8.686039668 | 7.635538852 | 7.348122693 | 9.200174908 | 8.791614446 | 8.884040408 | 9.180384776 |
| SNRN#40  | 8.681870206 | 8.377659356 | 9.122114638 | 8.122114638 | 8.377659356 | 8.81404517  | 8.81404517   | 8.695440724  | 8.567507434 | 8.567507434 | 8.332444318 | 9.050605511 | 8.582331344 | 9.26057699  | 8.576004117 | 8.769364238 | 8.724773483 |             |
| MCMT     | 7.952949412 | 8.635988667 | 9.080237763 | 9.127313703 | 8.153513217 | 8.513093714 | 9.289939222  | 9.140463498  | 8.378745641 | 8.458959148 | 8.78064794  | 8.257715079 | 9.14904165  | 9.073624876 | 8.37753446  | 8.802567874 | 8.778498588 | 9.148982981 |
| MPHOS#9  | 8.6082318   | 8.221366364 | 8.852698059 | 8.724391432 | 8.852698059 | 8.50210771  | 8.634808901  | 8.802873246  | 8.875806553 | 8.791308621 | 8.781106307 | 7.769435171 | 8.922095506 | 7.236867279 | 8.322095506 | 8.22095506  | 8.22095506  | 8.322095506 |
| ENB18P#2 | 9.08180363  | 9.14852019  | 9.069297262 | 8.896784625 | 8.896784625 | 8.41290374  | 8.750714502  | 8.750714502  | 8.750714502 | 8.750714502 | 8.750714502 | 8.750714502 | 8.750714502 | 8.750714502 | 8.750714502 | 8.750714502 | 8.750714502 | 8.750714502 |
| EMD      | 9.166894798 | 9.032883952 | 8.990508839 | 9.011872007 | 8.67540795  | 9.210541198 | 9.900898301  | 8.850871179  | 9.798304042 | 8.614984601 | 8.603272689 | 8.780895663 | 9.39031554  | 8.551853191 | 8.63087425  | 8.600770144 | 8.549998417 | 8.837259579 |
| IFITM1   | 9.54085132  | 8.48177345  | 8.881701767 | 9.051477345 | 8.788063996 | 8.692410259 | 7.88613009   | 8.95655325   | 8.809117907 | 8.665918874 | 9.076937336 | 8.361709133 | 8.919246947 | 8.48182759  | 8.770043124 | 8.231478104 | 9.084074613 |             |
| TGDS     | 9.3647708   | 9.129608599 | 9.074597138 | 8.964347696 | 8.806603165 | 9.673602702 | 9.491709877  | 8.369159944  | 8.750280333 | 8.704275963 | 8.522771785 | 9.127329875 | 8.689737806 | 9.698270028 | 8.773710706 | 8.606712491 | 8.613965979 | 9.202014620 |
| SMCS     | 8.754282771 | 8.200848832 | 8.744191011 | 8.988525143 | 8.594875137 | 9.432276871 | 7.727131136  | 8.961656012  | 8.820292996 | 8.382051543 | 7.170950196 | 8.831323878 | 9.531831208 | 9.165192581 | 8.764870861 | 8.348794088 | 9.386968972 |             |
| WRD8     | 7.767191261 | 7.888756794 | 8.007910088 | 8.007910088 | 8.589705129 | 8.986982474 | 9.020523811  | 9.144560275  | 8.693451297 | 8.703760189 | 9.110790604 | 8.902558033 | 9.056231811 | 9.309010103 | 8.519175563 | 9.175578645 | 8.801883068 | 8.821307503 |
| AFM2     | 8.745242865 | 8.193393296 | 9.079917897 | 8.876891257 | 8.832058533 | 8.944415565 | 8.534132808  | 9.578828023  | 9.055809946 | 8.903456736 | 8.952638252 | 8.612563424 | 8.871974888 | 8.986951939 | 8.418179578 | 8.596540329 | 8.829642372 | 8.345822299 |
| PM11     | 8.903482355 | 8.733554474 | 9.296504099 | 9.17549543  | 8.473459728 | 8.57207253  | 8.65128548   | 9.131478849  | 9.11520299  | 8.763259297 | 8.688210042 | 8.145333692 | 8.647508687 | 8.954853566 | 9.22207915  | 8.70406831  |             |             |
| PPF39    | 8.671071869 | 8.69368368  | 8.554091129 | 8.978511964 | 9.137996224 | 8.500323084 | 8.650191799  | 9.140502056  | 8.383492099 | 9.185271229 | 8.59605366  | 9.23271915  | 9.277916603 | 8.046365095 | 9.436252831 | 8.880378358 | 9.106850055 | 8.515461085 |
| ARGHAP   | 8.817942504 | 8.298246534 | 8.744871862 | 8.744871862 | 8.350882035 | 8.261425286 | 8.804780897  | 8.638121612  | 9.079294035 | 8.638121612 | 8.574653116 | 9.106964251 | 9.29055222  | 8.587624337 | 8.788525557 | 8.785052422 | 8.780429604 |             |
| GLE1     | 9.173067306 | 9.041782021 | 8.613117102 | 8.352869127 | 8.993893931 | 8.515933543 | 8.891144166  | 8.668869333  | 9.124774579 | 8.729457322 | 8.842339739 | 9.427440408 | 8.957858207 | 9.304180217 | 8.606462687 | 7.940611887 | 8.567210427 | 8.128730119 |
| AIMP1    | 8.960079332 | 9.017930049 | 9.653265084 | 9.111826624 | 8.402978034 | 9.0989237   | 8.103071432  | 8.335239609  | 8.78926197  | 8.577072    | 8.792005883 | 9.248652654 | 9.335644653 | 8.430215129 | 8.590043892 | 8.562302301 | 8.942272521 | 8.432624669 |
| MAPK#3   | 8.77146972  | 9.02508906  | 8.2625188   | 9.032698152 | 9.0282225   | 8.764574269 | 8.954521497  | 8.6676013107 | 8.75664659  | 8.593949227 | 8.200624297 | 8.644889585 | 8.481898837 | 9.571079864 | 8.808288554 | 9.155546543 | 8.804602572 | 8.45455576  |
| NEPRO    | 8.844700775 | 9.139483302 | 8.310861338 | 8.563328188 | 8.764574269 | 8.954521497 | 8.6676013107 | 8.75664659   | 8.593949227 | 8.200624297 | 8.200624297 | 8.644889585 | 8.481898837 | 9.571079864 | 8.808288554 | 9.155546543 | 8.804602572 | 8.45455576  |
| CD3L2    | 9.153821611 | 9.158077502 | 9.118807049 | 9.158077502 | 9.118807049 | 8.735244932 | 8.732091443  | 8.396721089  | 8.390919911 | 8.323249622 | 8.58564605  | 8.09546169  | 8.970860723 | 9.112377814 | 8.603754252 | 8.495013452 | 8.17081222  | 8.37943439  |
| TMEM45   | 8.823997268 | 7.5884065   | 8.189670864 | 8.907108364 | 8.33312188  | 8.446578141 | 8.446578141  | 8.286303471  | 9.44481574  | 8.51230922  | 9.15576419  | 9.91839301  | 8.248745634 | 8.20233113  | 9.050940025 | 9.091400971 | 8.743140299 | 8.570974683 |
| THOP1    | 8.780671116 | 8.47880765  | 8.112327438 | 8.47880765  | 8.112327438 | 9.244953127 | 9.464423387  | 8.446578141  | 8.794803288 | 8.728689171 | 8.913361214 | 8.587308346 | 8.082632178 | 6.703405194 | 8.785168597 | 8.983667174 | 8.605602654 | 8.906685987 |
| TFW2     | 9.109867605 | 9.070238986 | 9.607653253 | 9.29244145  | 8.808636303 | 8.842681901 | 8.807836922  | 8.246028754  | 8.532700342 | 8.491768456 | 8.757948213 | 9.027208189 | 9.53363113  | 8.302489975 | 8.317114854 | 8.472552978 | 8.562595365 | 8.635267067 |
| MPLIK    | 8.847919575 | 8.75266849  | 9.162326731 | 8.874228889 | 8.75266849  | 9.122129952 | 8.361459592  | 8.501399308  | 8.255878781 | 8.812421091 | 8.514767619 | 9.049365625 | 9.069205989 | 9.100403456 | 8.420439593 | 8.594191054 | 8.701449095 | 8.919466963 |
| TMEM184C | 8.53364057  | 8.985007611 | 9.032307337 | 8.53364057  | 8.985007611 | 8.105234537 | 9.598380033  | 8.684653886  | 9.061660594 | 8.330046762 | 8.854279108 | 9.378018728 | 8.536074572 | 3.356835731 | 8.667849609 | 9.988523407 | 9.26870685  | 9.038426217 |
| OGFOD2   | 9.145214715 | 8.469439044 | 8.681903435 | 8.128277874 | 8.799490013 | 8.888725431 | 8.496779082  | 8.38793146   | 8.631290848 | 9.38793146  | 9.173829048 | 9.552350095 | 9.48330524  | 9.280964441 | 8.897035151 | 8.763637745 | 8.819247459 | 8.71962232  |
| SLC44A1P | 8.544474203 | 8.243816463 | 8.88748034  | 8.959241024 | 7.950523931 | 8.548391321 | 8.369782487  | 8.833905919  | 8.638045043 | 9.356388665 | 8.193651244 | 9.957846182 | 8.189408299 | 9.41946871  | 8.768898959 | 9.040253824 | 8.29635930  | 8.683696993 |
| GALNT1   | 9.172219239 | 8.772148127 | 8.952392389 | 8.772148127 | 8.952392389 | 9.172219239 | 8.772148127  | 8.952392389  | 9.172219239 | 8.772148127 | 8.952392389 | 9.172219239 | 8.772148127 | 8.952392389 | 9.172219239 | 8.772148127 | 8.952392389 | 9.172219239 |
| PIGK     | 8.100419317 | 8.556237389 | 8.724433345 | 8.95237389  | 8.724433345 | 8.95237389  | 8.724433345  | 8.95237389   | 8.724433345 | 8.95237389  | 8.724433345 | 8.95237389  | 8.724433345 | 8.95237389  | 8.724433345 | 8.95237389  | 8.724433345 | 8.95237389  |
| DYNC1L   | 9.352696187 | 8.597966533 | 8.994258857 | 9.074260026 | 9.006037504 | 8.861729663 | 8.536884024  | 8.390961719  | 8.755662991 | 8.520500606 | 8.698654779 | 9.014679919 | 9.422807223 | 8.564315208 | 8.808464809 | 8.872260446 | 8.530458575 | 8.636214947 |
| PLIN2    | 8.685857374 | 8.937047026 | 8.592539735 | 8.678002312 | 8.295123975 | 8.861480895 | 8.350600307  | 9.043540548  | 8.610600307 | 8.458540604 | 8.499462625 | 8.222124979 | 8.669696520 | 9.479680536 | 9.202046098 | 8.460401277 | 8.798548708 | 9.567851111 |
| CKLF     | 9.105382635 | 8.92328188  | 9.17174533  | 9.196168822 | 8.62854634  | 9.589896181 | 8.761261369  | 8.240045753  | 8.787826569 | 8.395260491 | 8.741037881 | 9.290194054 | 8.770632505 | 8.917204773 | 7.76738917  | 8.713405337 | 8.822380051 | 8.742429256 |
| GALNT3   | 7.779649834 | 7.890390314 | 8.455581033 | 8.193800394 | 8.193800394 | 8.266071969 | 8.733098545  | 9.344386694  | 8.733098545 | 9.344386694 | 8.733098545 | 9.344386694 | 8.733098545 | 9.344386694 | 8.733098545 | 9.344386694 | 8.733098545 | 9.344386694 |
| RBM48    | 8.673004344 | 8.232091424 | 9.25476779  | 8.665139561 | 8.397635324 | 8.712582344 | 9.388761036  | 8.769992323  | 8.238317032 | 9.024838355 | 8.25546929  | 8.793121257 | 9.481949268 | 9.471835104 | 8.567367375 | 7.888365813 | 8.988755163 | 8.320472606 |
| GNAS1    | 9.374339932 | 9.078141227 | 9.050696625 | 8.980809925 | 8.850809925 | 8.980809925 | 8.850809925  | 8.980809925  | 8.850809925 | 8.980809925 | 8.850809925 | 8.980809925 | 8.850809925 | 8.980809925 | 8.850809925 | 8.980809925 | 8.850809925 | 8.980809925 |
| MAP1A    | 8.319467924 | 8.590856005 | 8.780252552 | 8.41152766  | 7.774771153 | 8.774771153 | 8.774771153  | 8.41152766   | 8.774771153 | 8.41152766  | 8.774771153 | 8.41152766  | 8.774771153 | 8.41152766  | 8.774771153 | 8.41152766  | 8.774771153 | 8.41152766  |
| KLFA     | 9.171635974 | 9.037236012 | 8.180257319 | 8.872063631 | 8.867813573 | 8.820025997 | 8.880069858  | 9.72706914   | 8.66534067  | 8.74624534  | 8.778188157 | 8.879419179 | 9.045970817 | 8.709339568 | 8.744823263 | 7.678390648 | 7.587375394 | 8.930289955 |
| GNAS1    | 8.838787355 | 9.037618708 | 9.666932017 | 9.09938392  | 8.880941184 | 8.781719175 | 9.160154329  | 8.456194128  | 8.56194128  | 8.456194128 | 8.56194128  | 8.456194128 | 8.56194128  | 8.456194128 | 8.56194128  | 8.456194128 | 8.56194128  | 8.456194128 |
| GT2F2    | 9.812604959 | 8.949653645 | 8.576239328 | 8.94596033  | 8.622806679 | 9.19487395  | 9.294211027  | 8.770395374  | 8.650158235 | 8.655121496 | 8.518045719 | 9.028795556 | 9.031990201 | 8.600929254 | 8.573675561 | 8.828400941 | 8.783980463 | 8.420839218 |
| LIMD1    | 7.572832955 | 9.032017066 | 8.587026825 | 7.827797116 | 7.909286849 | 8.727797116 | 7.909286849  | 8.587026825  | 7.827797116 | 7.909286849 | 8.587026825 | 7.827797116 | 7.909286849 | 8.587026825 | 7.827797116 | 7.909286849 | 8.587026825 | 7.827797116 |
| LRIF1    | 9.621982955 | 9.09064329  | 8.781509805 | 9.528019879 | 9.396374299 | 8.690693376 | 9.369755704  | 8.770378038  | 8.856845152 | 8.649178347 | 8.456742895 | 9.168225668 | 8.613442116 | 7.37052446  | 8.403803121 | 8.874687716 | 8.343525284 | 8.849978803 |
| CNIH1    | 9.0719353   | 9.498549503 | 8.802929826 | 8.83138762  | 9.391573939 | 8.46629357  | 8.510986135  | 8.13415413   | 8.78296415  | 8.170835246 | 8.782522012 |             |             |             |             |             |             |             |





|          |             |             |             |             |             |             |             |             |             |             |             |             |             |             |             |             |             |             |
|----------|-------------|-------------|-------------|-------------|-------------|-------------|-------------|-------------|-------------|-------------|-------------|-------------|-------------|-------------|-------------|-------------|-------------|-------------|
| POLK     | 8.059692631 | 8.510189241 | 8.683084017 | 8.282444412 | 9.452524669 | 9.029480919 | 8.403176316 | 8.621822645 | 8.833972985 | 9.093105895 | 8.729854307 | 8.702721055 | 7.721958968 | 8.542649787 | 9.001875315 | 8.874769666 | 8.781860271 | 8.805018876 |
| LIG3     | 7.712426422 | 8.372623724 | 8.677847321 | 8.273197531 | 7.927268052 | 7.732384655 | 8.236023151 | 8.578363574 | 9.290686293 | 8.717484546 | 8.951866525 | 8.479310035 | 8.449327655 | 9.655458284 | 8.350048356 | 8.765744224 | 8.786633338 | 8.715027367 |
| ZRSR2    | 8.839024461 | 8.098980257 | 8.745849442 | 8.499495982 | 9.255323934 | 8.706548438 | 8.726011504 | 8.514271729 | 8.895649654 | 8.582165888 | 8.455707982 | 8.542996149 | 9.237864521 | 9.169446124 | 8.133247414 | 8.539191629 | 8.725727222 | 8.530089399 |
| AH1      | 7.939761779 | 7.714823994 | 8.268437679 | 8.148859375 | 8.994596886 | 8.868871413 | 8.409140531 | 9.078925794 | 8.402795161 | 9.527841105 | 8.570012748 | 8.453524479 | 9.593784406 | 8.544768445 | 9.272930222 | 9.178300409 | 9.725939311 | 8.703581192 |
| EPH1     | 9.179433644 | 7.942397262 | 8.761956833 | 8.540442722 | 8.769128284 | 8.142136291 | 8.418218212 | 8.766944044 | 8.834548667 | 8.541626293 | 8.766944044 | 8.541626293 | 8.766944044 | 8.541626293 | 8.220790411 | 8.895127265 | 8.397169616 | 8.704251266 |
| PPF3     | 8.532876664 | 8.532876664 | 8.242670908 | 8.982558777 | 8.772349981 | 8.975958383 | 8.450342058 | 8.670686678 | 8.605504772 | 8.670212172 | 8.583262629 | 8.538262629 | 8.731359056 | 8.641278226 | 8.836178517 | 8.403340019 | 9.032996077 | 8.580013191 |
| PHR1     | 8.917477403 | 7.937480465 | 8.542536066 | 7.829343886 | 8.762847379 | 8.660150808 | 9.077679038 | 8.921131864 | 8.770638057 | 8.581514292 | 8.602191053 | 8.322718635 | 7.447780027 | 9.034545762 | 8.623082966 | 9.062807894 | 9.097206251 | 8.855211212 |
| ATF6B    | 8.265677002 | 8.928224346 | 8.935272005 | 8.869906506 | 8.812127179 | 8.577474354 | 8.998196795 | 8.77649494  | 8.281098422 | 8.649295616 | 8.136988773 | 8.339629947 | 8.869640488 | 8.274039224 | 8.587947834 | 8.340611259 | 8.773644211 | 8.652661814 |
| POLR3D   | 9.116220208 | 9.696073849 | 9.484428255 | 9.248294021 | 8.991976797 | 8.398516986 | 8.675889214 | 8.384164688 | 8.866040074 | 8.690376842 | 8.739371762 | 8.133105462 | 8.493772612 | 8.831301968 | 8.251035159 | 8.784808206 | 8.448739543 | 8.346581688 |
| RINL     | 8.788854941 | 8.918681316 | 8.918681316 | 8.918681316 | 8.918681316 | 8.918681316 | 8.918681316 | 8.918681316 | 8.918681316 | 8.918681316 | 8.918681316 | 8.918681316 | 8.918681316 | 8.918681316 | 8.918681316 | 8.918681316 | 8.918681316 | 8.918681316 |
| CPQ      | 8.979463863 | 8.744481817 | 8.864204058 | 8.744481817 | 8.864204058 | 8.744481817 | 8.864204058 | 8.744481817 | 8.864204058 | 8.744481817 | 8.864204058 | 8.744481817 | 8.864204058 | 8.744481817 | 8.864204058 | 8.744481817 | 8.864204058 | 8.744481817 |
| THEM160  | 8.879628012 | 9.061877998 | 8.729077362 | 8.351748435 | 8.305408234 | 9.298718104 | 8.81495061  | 8.704492578 | 8.633070551 | 8.961095652 | 8.701527727 | 8.722281288 | 8.786087557 | 8.792012448 | 8.252993539 | 8.039002345 | 8.790702437 | 8.701518844 |
| SMO2     | 9.067558588 | 9.034254449 | 9.022126569 | 9.022126569 | 9.022126569 | 9.022126569 | 9.022126569 | 9.022126569 | 9.022126569 | 9.022126569 | 9.022126569 | 9.022126569 | 9.022126569 | 9.022126569 | 9.022126569 | 9.022126569 | 9.022126569 | 9.022126569 |
| ARL16    | 8.934704888 | 8.699480666 | 8.90278763  | 9.034345009 | 9.072995979 | 8.741266085 | 8.683585725 | 8.243077732 | 8.377352254 | 8.602329584 | 8.380362893 | 8.769891955 | 9.232326206 | 8.521107073 | 8.678088321 | 8.089519799 | 8.551426214 | 8.812274884 |
| GOT1     | 8.906376441 | 8.923880161 | 8.22532052  | 8.22532052  | 8.22532052  | 8.22532052  | 8.22532052  | 8.22532052  | 8.22532052  | 8.22532052  | 8.22532052  | 8.22532052  | 8.22532052  | 8.22532052  | 8.22532052  | 8.22532052  | 8.22532052  | 8.22532052  |
| IL15     | 8.471902429 | 9.284829665 | 7.326679912 | 8.838830567 | 9.095976608 | 8.93750552  | 8.69456273  | 8.482689374 | 8.016940602 | 8.37783124  | 8.048448292 | 9.443744576 | 8.89911164  | 9.004688322 | 8.573121921 | 8.363621695 | 8.956379521 | 8.727112449 |
| CCL5     | 8.372798054 | 9.055778864 | 8.832061211 | 8.73272662  | 8.696030049 | 9.418582653 | 7.890217789 | 8.574551764 | 8.59183452  | 8.437102894 | 8.903681218 | 9.114974121 | 9.903003918 | 8.695372449 | 8.985384055 | 8.7254297   | 8.406890167 | 9.659737711 |
| CD23     | 9.104011412 | 8.960121861 | 8.997107416 | 8.801725738 | 7.37169546  | 8.78039002  | 9.055269319 | 8.093166678 | 8.724601277 | 9.038888142 | 7.922409938 | 9.274400651 | 8.299510797 | 9.288784625 | 8.354684312 | 8.815411602 | 8.652731265 | 8.159709409 |
| TKNS     | 8.854816486 | 9.251087377 | 8.492002013 | 7.887893095 | 8.780262578 | 8.448239196 | 8.687894382 | 8.24439506  | 8.678984382 | 8.24439506  | 8.678984382 | 8.24439506  | 8.678984382 | 8.24439506  | 8.678984382 | 8.24439506  | 8.678984382 | 8.24439506  |
| ISAC2    | 9.32964714  | 8.785238912 | 8.911086999 | 8.936689703 | 9.114154878 | 8.765479389 | 8.771812028 | 9.968048666 | 8.472371354 | 8.054569076 | 8.585421116 | 8.54484456  | 9.292991295 | 8.976195489 | 8.093282331 | 8.576506002 | 8.218012891 | 8.625017178 |
| LAGE3    | 8.724086556 | 9.072770437 | 8.729404559 | 8.824948831 | 8.955038861 | 9.024610987 | 8.699022709 | 9.345179989 | 8.265184198 | 8.135948886 | 8.498848274 | 9.092238735 | 9.068421243 | 8.900709097 | 8.101531785 | 8.273282565 | 8.123798735 | 8.542329064 |
| RABB8    | 7.142939459 | 7.735007334 | 8.978044168 | 8.032583959 | 8.67116375  | 8.708370336 | 9.40643139  | 9.232044538 | 8.61037135  | 8.740644139 | 9.232044538 | 8.61037135  | 8.740644139 | 9.232044538 | 8.61037135  | 8.740644139 | 9.232044538 | 8.61037135  |
| MCMS     | 8.725139593 | 8.227017743 | 8.69252272  | 9.988929524 | 8.949649351 | 8.722545133 | 8.88099969  | 8.621964609 | 8.848881972 | 8.034908589 | 8.686308948 | 8.265162446 | 8.477814448 | 9.276174391 | 8.618616439 | 8.77630995  | 8.485767644 | 8.917982326 |
| FOXRED1  | 8.804933137 | 7.972744097 | 8.792744097 | 8.804933137 | 8.792744097 | 8.804933137 | 8.792744097 | 8.804933137 | 8.792744097 | 8.804933137 | 8.792744097 | 8.804933137 | 8.792744097 | 8.804933137 | 8.792744097 | 8.804933137 | 8.792744097 | 8.804933137 |
| RAB3GAP1 | 8.409670123 | 8.409670123 | 8.409670123 | 8.409670123 | 8.409670123 | 8.409670123 | 8.409670123 | 8.409670123 | 8.409670123 | 8.409670123 | 8.409670123 | 8.409670123 | 8.409670123 | 8.409670123 | 8.409670123 | 8.409670123 | 8.409670123 | 8.409670123 |
| MRP25    | 9.007182039 | 9.061376393 | 9.305312091 | 8.885367047 | 9.062448241 | 8.754923854 | 8.59399171  | 8.231144886 | 8.804967502 | 8.571705661 | 8.52534739  | 8.421878276 | 8.832082125 | 8.987251057 | 8.590815711 | 8.607036225 | 8.343024318 | 8.662014097 |
| DDX50    | 8.448961804 | 9.002346463 | 9.27765349  | 9.244983055 | 9.199255036 | 8.601175813 | 8.66753312  | 8.137879191 | 8.902886649 | 8.353939058 | 8.808274772 | 8.749089943 | 9.204120357 | 6.649782626 | 7.651880472 | 8.788335052 | 8.532805359 | 8.371193128 |
| ISG2     | 9.32964714  | 8.583238912 | 8.911086999 | 8.936689703 | 9.114154878 | 8.765479389 | 8.771812028 | 9.968048666 | 8.472371354 | 8.054569076 | 8.585421116 | 8.54484456  | 9.292991295 | 8.976195489 | 8.093282331 | 8.576506002 | 8.218012891 | 8.625017178 |
| LAGE3    | 8.724086556 | 9.072770437 | 8.729404559 | 8.824948831 | 8.955038861 | 9.024610987 | 8.699022709 | 9.345179989 | 8.265184198 | 8.135948886 | 8.498848274 | 9.092238735 | 9.068421243 | 8.900709097 | 8.101531785 | 8.273282565 | 8.123798735 | 8.542329064 |
| RABB8    | 7.142939459 | 7.735007334 | 8.978044168 | 8.032583959 | 8.67116375  | 8.708370336 | 9.40643139  | 9.232044538 | 8.61037135  | 8.740644139 | 9.232044538 | 8.61037135  | 8.740644139 | 9.232044538 | 8.61037135  | 8.740644139 | 9.232044538 | 8.61037135  |
| MCMS     | 8.725139593 | 8.227017743 | 8.69252272  | 9.988929524 | 8.949649351 | 8.722545133 | 8.88099969  | 8.621964609 | 8.848881972 | 8.034908589 | 8.686308948 | 8.265162446 | 8.477814448 | 9.276174391 | 8.618616439 | 8.77630995  | 8.485767644 | 8.917982326 |
| FOXRED1  | 8.804933137 | 7.972744097 | 8.792744097 | 8.804933137 | 8.792744097 | 8.804933137 | 8.792744097 | 8.804933137 | 8.792744097 | 8.804933137 | 8.792744097 | 8.804933137 | 8.792744097 | 8.804933137 | 8.792744097 | 8.804933137 | 8.792744097 | 8.804933137 |
| RAB3GAP1 | 8.409670123 | 8.409670123 | 8.409670123 | 8.409670123 | 8.409670123 | 8.409670123 | 8.409670123 | 8.409670123 | 8.409670123 | 8.409670123 | 8.409670123 | 8.409670123 | 8.409670123 | 8.409670123 | 8.409670123 | 8.409670123 | 8.409670123 | 8.409670123 |
| MRP25    | 9.007182039 | 9.061376393 | 9.305312091 | 8.885367047 | 9.062448241 | 8.754923854 | 8.59399171  | 8.231144886 | 8.804967502 | 8.571705661 | 8.52534739  | 8.421878276 | 8.832082125 | 8.987251057 | 8.590815711 | 8.607036225 | 8.343024318 | 8.662014097 |
| DDX50    | 8.448961804 | 9.002346463 | 9.27765349  | 9.244983055 | 9.199255036 | 8.601175813 | 8.66753312  | 8.137879191 | 8.902886649 | 8.353939058 | 8.808274772 | 8.749089943 | 9.204120357 | 6.649782626 | 7.651880472 | 8.788335052 | 8.532805359 | 8.371193128 |
| ISG2     | 9.32964714  | 8.583238912 | 8.911086999 | 8.936689703 | 9.114154878 | 8.765479389 | 8.771812028 | 9.968048666 | 8.472371354 | 8.054569076 | 8.585421116 | 8.54484456  | 9.292991295 | 8.976195489 | 8.093282331 | 8.576506002 | 8.218012891 | 8.625017178 |
| LAGE3    | 8.724086556 | 9.072770437 | 8.729404559 | 8.824948831 | 8.955038861 | 9.024610987 | 8.699022709 | 9.345179989 | 8.265184198 | 8.135948886 | 8.498848274 | 9.092238735 | 9.068421243 | 8.900709097 | 8.101531785 | 8.273282565 | 8.123798735 | 8.542329064 |
| RABB8    | 7.142939459 | 7.735007334 | 8.978044168 | 8.032583959 | 8.67116375  | 8.708370336 | 9.40643139  | 9.232044538 | 8.61037135  | 8.740644139 | 9.232044538 | 8.61037135  | 8.740644139 | 9.232044538 | 8.61037135  | 8.740644139 | 9.232044538 | 8.61037135  |
| MCMS     | 8.725139593 | 8.227017743 | 8.69252272  | 9.988929524 | 8.949649351 | 8.722545133 | 8.88099969  | 8.621964609 | 8.848881972 | 8.034908589 | 8.686308948 | 8.265162446 | 8.477814448 | 9.276174391 | 8.618616439 | 8.77630995  | 8.485767644 | 8.917982326 |
| FOXRED1  | 8.804933137 | 7.972744097 | 8.792744097 | 8.804933137 | 8.792744097 | 8.804933137 | 8.792744097 | 8.804933137 | 8.792744097 | 8.804933137 | 8.792744097 | 8.804933137 | 8.792744097 | 8.804933137 | 8.792744097 | 8.804933137 | 8.792744097 | 8.804933137 |
| RAB3GAP1 | 8.409670123 | 8.409670123 | 8.409670123 | 8.409670123 | 8.409670123 | 8.409670123 | 8.409670123 | 8.409670123 | 8.409670123 | 8.409670123 | 8.409670123 | 8.409670123 | 8.409670123 | 8.409670123 | 8.409670123 | 8.409670123 | 8.409670123 | 8.409670123 |
| MRP25    | 9.007182039 | 9.061376393 | 9.305312091 | 8.885367047 | 9.062       |             |             |             |             |             |             |             |             |             |             |             |             |             |



|          |             |             |             |             |             |             |             |             |             |             |             |             |             |             |             |             |             |             |
|----------|-------------|-------------|-------------|-------------|-------------|-------------|-------------|-------------|-------------|-------------|-------------|-------------|-------------|-------------|-------------|-------------|-------------|-------------|
| ANTXR2   | 8.614708827 | 8.142435695 | 8.418170523 | 9.191584819 | 7.258287316 | 9.067905182 | 9.268213019 | 8.795156824 | 8.477309516 | 8.659909087 | 8.666581191 | 7.572775599 | 8.633257417 | 8.339529472 | 9.539993739 | 8.793372645 | 8.421034397 | 8.948323626 |
| RNR3     | 9.100278939 | 9.002708258 | 9.168664165 | 8.29257306  | 8.63267783  | 8.634141269 | 8.152897965 | 8.925419025 | 8.63267783  | 8.634141269 | 8.152897965 | 8.925419025 | 8.63267783  | 8.634141269 | 8.152897965 | 8.925419025 | 8.63267783  | 8.634141269 |
| ENOX2    | 8.886679438 | 9.065636788 | 9.065636788 | 9.766792872 | 8.866532754 | 9.727914854 | 9.798741543 | 7.313420923 | 7.58555437  | 8.917838181 | 8.737927288 | 7.932396877 | 8.473207044 | 9.479974331 | 7.819666531 | 8.576248771 | 8.325807721 | 8.878976218 |
| PPPS3    | 7.729722111 | 8.263413004 | 8.690997552 | 8.887488039 | 9.157692609 | 8.745249042 | 8.520302758 | 7.448005115 | 8.598781725 | 8.399940045 | 8.119357073 | 8.848573922 | 8.954266108 | 8.488881945 | 8.495019058 | 8.553943643 | 8.694734728 | 8.320473728 |
| COX5B    | 9.129641931 | 9.026814883 | 8.644215708 | 9.144875586 | 9.08525108  | 9.08525108  | 9.29007765  | 8.659153683 | 8.659153683 | 9.29007765  | 8.659153683 | 9.29007765  | 8.659153683 | 9.29007765  | 8.659153683 | 9.29007765  | 8.659153683 | 9.29007765  |
| ATADA3   | 8.551868939 | 8.551868939 | 8.551868939 | 8.551868939 | 8.551868939 | 8.551868939 | 8.551868939 | 8.551868939 | 8.551868939 | 8.551868939 | 8.551868939 | 8.551868939 | 8.551868939 | 8.551868939 | 8.551868939 | 8.551868939 | 8.551868939 | 8.551868939 |
| KIAA0430 | 8.54065477  | 7.56754054  | 9.059690377 | 8.69358577  | 8.979182466 | 8.464008774 | 9.110444722 | 8.623340865 | 8.499177019 | 8.824054598 | 8.663206548 | 8.354935463 | 9.22376964  | 9.114558273 | 8.817680611 | 8.620317371 | 9.253657005 | 8.575585375 |
| PANKA4   | 9.226436254 | 9.075720768 | 8.489358177 | 8.969891862 | 8.495166103 | 8.160094593 | 8.249515205 | 8.673595899 | 8.249515205 | 8.673595899 | 8.249515205 | 8.673595899 | 8.249515205 | 8.673595899 | 8.249515205 | 8.673595899 | 8.249515205 | 8.673595899 |
| SIN3A    | 8.430502614 | 9.311698347 | 8.497133735 | 8.34199253  | 8.505651708 | 8.810716122 | 8.700831135 | 8.685559986 | 8.800827719 | 7.380045422 | 8.690142021 | 8.448219577 | 8.866875822 | 7.741478382 | 8.504286623 | 8.937714939 | 8.67733004  | 8.366622073 |
| ACAD9    | 8.455943545 | 7.861618384 | 9.125586527 | 8.40653628  | 8.40653628  | 8.40653628  | 8.40653628  | 8.40653628  | 8.40653628  | 8.40653628  | 8.40653628  | 8.40653628  | 8.40653628  | 8.40653628  | 8.40653628  | 8.40653628  | 8.40653628  | 8.40653628  |
| NFKL1    | 8.689160658 | 9.465490002 | 8.63779497  | 9.445672647 | 8.116456303 | 8.780092441 | 8.510539127 | 8.510539127 | 8.510539127 | 8.510539127 | 8.510539127 | 8.510539127 | 8.510539127 | 8.510539127 | 8.510539127 | 8.510539127 | 8.510539127 | 8.510539127 |
| NDUFA1   | 8.889792519 | 9.168883838 | 8.697051491 | 8.638017579 | 8.773610502 | 8.55248373  | 7.901858106 | 8.645453992 | 8.572105601 | 8.205650992 | 8.581558186 | 8.646517906 | 8.55259835  | 7.68400476  | 8.780463036 | 8.917593044 | 8.394852983 | 8.681403959 |
| FAM126A  | 8.62174857  | 8.061769077 | 9.047035107 | 8.848331759 | 9.042615199 | 8.632496982 | 8.490029768 | 8.223155567 | 8.581558186 | 8.646517906 | 8.55259835  | 7.68400476  | 8.780463036 | 8.917593044 | 8.394852983 | 8.681403959 |             |             |
| WIF5     | 7.977526537 | 9.173481072 | 9.046999745 | 8.419495462 | 9.03964975  | 8.588184812 | 9.12954407  | 8.677536343 | 8.905512364 | 8.60290215  | 8.654208564 | 8.196530391 | 9.147872443 | 8.622816418 | 8.619859187 | 8.354121258 | 8.43247912  | 9.474827354 |
| HPF2     | 8.598098199 | 9.117605954 | 8.833127464 | 8.51442522  | 8.561756973 | 8.584538688 | 8.745893634 | 8.003945822 | 8.003945822 | 8.003945822 | 8.003945822 | 8.003945822 | 8.003945822 | 8.003945822 | 8.003945822 | 8.003945822 | 8.003945822 | 8.003945822 |
| TMEM94   | 8.861912936 | 8.579340717 | 9.267766035 | 8.542400397 | 8.738170891 | 8.364434466 | 8.019687874 | 8.70753193  | 8.671893172 | 8.245042132 | 8.86982461  | 8.517681247 | 8.831834167 | 8.577023139 | 8.824874131 | 8.656136587 | 8.251802715 | 8.861912936 |
| TEP1     | 7.030472952 | 9.08612422  | 9.043032073 | 8.0612422   | 8.424065112 | 8.36260361  | 8.372480430 | 8.758259854 | 8.694333379 | 8.89715247  | 9.002909116 | 9.427067399 | 8.7002265   | 8.579280899 | 8.414083599 | 8.707860168 | 8.237923653 |             |
| KIAA1429 | 8.639559135 | 9.253490368 | 8.785428586 | 8.235325202 | 8.97549742  | 8.506178689 | 8.573622766 | 8.788302857 | 8.68766255  | 8.428222804 | 8.725179161 | 8.63307244  | 9.727018943 | 8.799241503 | 8.22844593  | 8.949534405 | 8.650097435 | 8.790295669 |
| B3GAT3   | 8.829071059 | 8.61232428  | 8.907501957 | 8.58821     | 8.231514424 | 8.457170747 | 8.676262993 | 8.65459398  | 8.726142801 | 8.787510718 | 8.080406121 | 8.58562198  | 9.308750315 | 8.805762715 | 8.265008725 | 8.859126175 | 8.849091303 |             |
| PCNK1    | 8.334725907 | 8.656368004 | 8.359660162 | 8.359660162 | 8.722752384 | 7.658838768 | 8.137940622 | 9.307470398 | 8.616675151 | 8.753731243 | 8.714257473 | 7.465859334 | 7.97116225  | 8.94528454  | 8.991694788 | 8.998318279 | 8.88162208  | 8.12732771  |
| TMOC7    | 9.292762315 | 8.865012354 | 8.700939582 | 8.993927718 | 8.59984976  | 8.59984976  | 8.59984976  | 8.59984976  | 8.59984976  | 8.59984976  | 8.59984976  | 8.59984976  | 8.59984976  | 8.59984976  | 8.59984976  | 8.59984976  | 8.59984976  | 8.59984976  |
| SBNO1    | 8.826508524 | 7.847045089 | 9.02633253  | 8.06060422  | 8.077275648 | 8.588681854 | 8.961324894 | 9.013813549 | 8.759056228 | 8.96125563  | 9.416639603 | 8.156414603 | 8.12782165  | 8.680244577 | 9.07493285  | 8.529691233 | 8.552418807 |             |
| KCNQ1    | 8.987413491 | 9.291103398 | 7.988178886 | 8.649938093 | 9.166716449 | 9.178100044 | 7.748709105 | 8.353158475 | 9.118601025 | 8.629036601 | 8.758480979 | 7.997636523 | 8.109144669 | 8.85624081  | 8.47354742  | 8.639854352 | 8.440252007 | 8.938875085 |
| KIAA1109 | 8.814538818 | 9.747029692 | 8.291257304 | 8.647006112 | 8.701763496 | 8.626488008 | 8.929662979 | 7.885518924 | 8.929662979 | 7.885518924 | 8.929662979 | 7.885518924 | 8.929662979 | 7.885518924 | 8.929662979 | 7.885518924 | 8.929662979 | 7.885518924 |
| LNS14    | 8.149758686 | 8.032166073 | 8.623697252 | 8.691922265 | 8.648784825 | 8.648784825 | 8.335199128 | 8.289190228 | 9.335199128 | 8.289190228 | 9.335199128 | 8.289190228 | 9.335199128 | 8.289190228 | 9.335199128 | 8.289190228 | 9.335199128 | 8.289190228 |
| NRP1     | 8.616313142 | 8.934306588 | 8.184405062 | 7.59237762  | 8.360037358 | 7.565761964 | 7.836076175 | 8.6905515   | 8.762314947 | 8.617912234 | 8.725049988 | 8.75555619  | 8.604988189 | 8.526943786 | 9.03828086  | 9.152462135 | 8.649532822 | 8.798961665 |
| ABCF2    | 8.915921078 | 8.457096211 | 8.081851231 | 9.367568792 | 9.384064075 | 9.639164199 | 8.073268771 | 7.794248605 | 8.512473739 | 8.174055452 | 8.91257502  | 8.142763319 | 8.251390355 | 8.647760134 | 8.67160134  | 8.516263888 | 8.704366658 |             |
| PCSK1    | 8.232570528 | 8.232570528 | 8.232570528 | 8.232570528 | 8.232570528 | 8.232570528 | 8.232570528 | 8.232570528 | 8.232570528 | 8.232570528 | 8.232570528 | 8.232570528 | 8.232570528 | 8.232570528 | 8.232570528 | 8.232570528 | 8.232570528 | 8.232570528 |
| CNKSR1   | 8.681613992 | 8.681613992 | 8.681613992 | 8.681613992 | 8.681613992 | 8.681613992 | 8.681613992 | 8.681613992 | 8.681613992 | 8.681613992 | 8.681613992 | 8.681613992 | 8.681613992 | 8.681613992 | 8.681613992 | 8.681613992 | 8.681613992 | 8.681613992 |
| FAM188A  | 7.79474423  | 8.314338802 | 6.228917554 | 8.752790632 | 9.165997369 | 9.08403397  | 8.538837723 | 8.852432358 | 8.69918877  | 8.46426991  | 8.613092563 | 9.09228183  | 8.646270519 | 8.135173507 | 8.849038249 | 9.24766478  | 8.586528819 | 8.51700876  |
| HACD2    | 8.431630255 | 7.754874765 | 7.754874765 | 7.754874765 | 7.754874765 | 7.754874765 | 7.754874765 | 7.754874765 | 7.754874765 | 7.754874765 | 7.754874765 | 7.754874765 | 7.754874765 | 7.754874765 | 7.754874765 | 7.754874765 | 7.754874765 | 7.754874765 |
| LYRM2    | 8.740840772 | 8.747400673 | 8.801526757 | 8.995487386 | 8.82525471  | 8.82525471  | 8.82525471  | 8.82525471  | 8.82525471  | 8.82525471  | 8.82525471  | 8.82525471  | 8.82525471  | 8.82525471  | 8.82525471  | 8.82525471  | 8.82525471  | 8.82525471  |
| DNTP11   | 9.262064745 | 8.74101497  | 8.4649252   | 8.810823867 | 8.676785452 | 8.660910705 | 8.629426653 | 8.01862249  | 8.18450251  | 8.84270113  | 8.974271209 | 7.777656515 | 9.19540361  | 8.059485685 | 8.542539191 | 8.463239603 | 8.807136333 |             |
| URGP     | 8.894793561 | 8.634028092 | 7.939275151 | 9.008878983 | 8.888914172 | 7.597910037 | 8.286206995 | 8.284260822 | 8.661406488 | 8.773099073 | 7.972846425 | 8.591910128 | 8.747048521 | 8.624133558 | 8.402744375 | 8.645556593 | 8.697892056 | 8.417370651 |
| CSHL     | 7.944060777 | 8.105804529 | 8.369302452 | 8.615414127 | 8.615414127 | 8.615414127 | 8.615414127 | 8.615414127 | 8.615414127 | 8.615414127 | 8.615414127 | 8.615414127 | 8.615414127 | 8.615414127 | 8.615414127 | 8.615414127 | 8.615414127 | 8.615414127 |
| OSGP     | 8.278840662 | 8.954210207 | 9.481175628 | 8.954210207 | 7.601212978 | 8.86008981  | 8.954210207 | 8.954210207 | 8.954210207 | 8.954210207 | 8.954210207 | 8.954210207 | 8.954210207 | 8.954210207 | 8.954210207 | 8.954210207 | 8.954210207 | 8.954210207 |
| TMEM38B  | 8.945827339 | 8.84550061  | 7.746386378 | 8.60709628  | 7.738453155 | 8.64740173  | 9.53805441  | 8.602757451 | 8.868289868 | 8.661147217 | 8.707627611 | 8.816028158 | 9.25982655  | 8.542035902 | 8.32740047  | 8.450963852 | 8.58475025  | 8.293160317 |
| RORA     | 8.453833051 | 8.605107439 | 9.217619481 | 8.858533051 | 6.257132869 | 7.495947466 | 6.75232307  | 9.181074469 | 9.34100617  | 9.22121785  | 9.017146372 | 8.657858995 | 8.68644213  | 7.111120295 | 9.132928265 | 9.04119307  | 8.643695866 | 8.401238846 |
| UGDH     | 8.312275319 | 9.603700868 | 8.546607366 | 8.623089664 | 8.622620575 | 8.372536692 | 8.267928012 | 8.629476556 | 9.258530207 | 8.984170432 | 8.717446837 | 8.222056248 | 8.994848041 | 8.39729505  | 8.474394121 | 8.879503398 | 8.809399393 | 8.710346055 |
| MVNN     | 8.452526687 | 8.101888597 | 8.683982528 | 8.101888597 | 8.399027759 | 9.684884186 | 8.811692022 | 8.800189992 | 8.844212561 | 9.227160368 | 8.226783493 | 8.646406902 | 8.441747146 | 8.820051399 | 8.207651538 | 8.606014616 |             |             |
| BDT      | 8.997395863 | 8.61462849  | 8.584396424 | 8.38062545  | 8.20743896  | 9.037517347 | 8.338160565 | 9.033368659 | 8.73540572  | 8.691314224 | 8.64148453  | 7.956016202 | 9.214931003 | 9.504098541 | 8.63793814  | 8.421796446 | 8.800980809 | 8.839824211 |
| TRIO     | 8.650957874 | 7.935642097 | 7.736799865 | 8.65787128  | 7.491129246 | 8.525462244 | 8.296523237 | 8.681741016 | 8.265830078 | 8.174695995 | 8.989566299 | 6.623921553 | 8.73925271  | 8.163173355 | 8.635646838 |             |             |             |



|          |             |             |             |             |             |             |              |             |             |             |             |             |             |             |             |             |             |             |
|----------|-------------|-------------|-------------|-------------|-------------|-------------|--------------|-------------|-------------|-------------|-------------|-------------|-------------|-------------|-------------|-------------|-------------|-------------|
| Czorf88  | 8.20401421  | 8.220951069 | 8.562254395 | 7.642411984 | 8.962990924 | 8.26905268  | 9.376008554  | 8.93542146  | 8.9164686   | 8.87704566  | 8.802330497 | 8.434552417 | 8.356439728 | 8.563452943 | 8.656218486 | 8.025205867 | 8.366373776 | 8.686243602 |
| ATG12    | 8.540730043 | 7.22402069  | 7.529497518 | 8.966426481 | 8.842175858 | 8.257330333 | 8.857932752  | 8.63150612  | 8.505686882 | 8.422795487 | 8.666360522 | 7.736142837 | 8.15512513  | 8.980904746 | 8.260425463 | 8.285289767 | 8.611955645 | 8.58151508  |
| HIRP3    | 8.95991446  | 9.686710878 | 8.894790927 | 9.678610878 | 9.2078967   | 9.427328623 | 9.347787851  | 8.060113801 | 8.60755893  | 8.879358774 | 8.86001613  | 8.262977301 | 8.483240177 | 7.956467889 | 8.679023703 | 8.418185203 | 8.517399904 | 8.120131251 |
| NELF8    | 9.167046022 | 9.04841536  | 9.383709737 | 8.160944685 | 9.053231039 | 8.797890968 | 8.588632292  | 8.130738457 | 8.507668425 | 8.974399863 | 8.357612467 | 9.158871739 | 8.97906619  | 8.810049639 | 8.027885652 | 8.536247119 | 8.435244862 | 8.349574139 |
| PURA     | 8.56802566  | 8.711731354 | 8.911279843 | 7.786361948 | 8.580935058 | 8.558427952 | 8.786543935  | 8.796543807 | 8.98511807  | 8.78514807  | 8.751739432 | 8.064763181 | 8.063751714 | 8.244073917 | 8.750435237 | 8.750435237 | 8.123822489 | 8.320016468 |
| PP1R16B  | 8.064786171 | 8.80776368  | 8.650876155 | 8.648319708 | 8.580261153 | 7.844499725 | 8.153749255  | 8.183078457 | 8.12445525  | 9.124854451 | 8.288277973 | 8.839333644 | 8.849655524 | 9.608849452 | 8.688451438 | 7.982300718 | 9.007213370 | 8.734705541 |
| POD7     | 8.875421351 | 9.195520668 | 9.221571842 | 8.535224149 | 9.007878484 | 8.588416346 | 8.993155387  | 8.434357857 | 8.609176407 | 8.280241096 | 8.130693443 | 8.405623022 | 9.01565307  | 8.750803193 | 7.900390717 | 8.182145099 | 8.292819173 | 8.33828575  |
| HS25T1   | 6.995754669 | 7.75576042  | 8.93673001  | 8.41905344  | 8.505934025 | 8.617637196 | 8.705210743  | 8.687779366 | 8.705210743 | 8.104587865 | 8.653907401 | 8.031520921 | 8.685301013 | 8.761843414 | 8.306052029 | 8.331930286 | 7.844492136 | 8.665273571 |
| KAT6A    | 8.577398985 | 8.286994432 | 8.058973637 | 8.580447025 | 8.716153432 | 8.939113723 | 8.150961911  | 8.749453226 | 7.886211571 | 8.608839341 | 8.566764078 | 7.67001192  | 7.347038465 | 8.258283242 | 9.0210306   | 8.790057179 | 8.565290787 | 8.655337908 |
| VMA21    | 8.837436756 | 8.08746423  | 8.08746423  | 9.248959082 | 8.08746423  | 8.479982323 | 8.578369211  | 8.942066409 | 8.578369211 | 8.942066409 | 8.566764078 | 7.67001192  | 7.347038465 | 8.258283242 | 9.0210306   | 8.790057179 | 8.565290787 | 8.655337908 |
| ANAS21   | 8.476974834 | 8.57580989  | 8.57580989  | 8.878247548 | 8.542543804 | 8.109657847 | 8.636405883  | 8.612451132 | 8.591286248 | 8.852471132 | 8.281832345 | 7.684002614 | 8.194893918 | 7.649238962 | 8.143817722 | 8.560299509 | 8.413817722 | 8.564760074 |
| USPL1    | 8.899714017 | 8.155599134 | 7.138751066 | 8.706120778 | 8.719952117 | 8.299531454 | 8.750191987  | 8.250986277 | 8.630294697 | 8.819071717 | 8.808936814 | 7.88749682  | 8.677610108 | 8.505558303 | 8.470052411 | 8.62844208  | 8.615721964 | 7.697460094 |
| KRCC1    | 8.683687811 | 9.150270085 | 8.58738315  | 9.035397055 | 8.232812778 | 8.781511    | 8.7878679464 | 8.284048979 | 8.523440562 | 8.891957095 | 9.430171815 | 7.68521209  | 7.375341302 | 8.51173248  | 8.108728314 | 8.77314017  |             |             |
| TNRF513C | 8.576550625 | 9.141865025 | 9.011357864 | 8.77238991  | 8.376717627 | 8.91456707  | 8.051440119  | 8.30355193  | 8.631474784 | 8.448277728 | 8.543618573 | 8.261678321 | 8.846207774 | 8.578728264 | 8.343683828 | 8.619423902 | 8.272959715 | 7.758231705 |
| WAFS32   | 9.153852300 | 9.281943428 | 8.973211135 | 8.973211135 | 8.53987728  | 9.212145996 | 8.802800897  | 8.712229797 | 8.412159226 | 8.64985146  | 8.64985146  | 8.692850435 | 7.9364601   | 8.727454231 | 8.09229903  | 8.370027727 | 7.707827727 | 8.684819374 |
| ASAP1    | 8.687953398 | 8.752694379 | 6.957364431 | 7.78237505  | 8.906555656 | 8.403974134 | 8.739119895  | 8.528307552 | 8.227578846 | 8.803390798 | 8.95123262  | 8.513129698 | 7.953675805 | 7.780480875 | 8.746922625 | 8.742276664 | 8.699425371 | 7.494183495 |
| SLC22A31 | 8.540251864 | 8.520484116 | 8.75528427  | 8.468364136 | 8.973971474 | 9.133688625 | 8.807162017  | 8.845172007 | 8.97959339  | 7.900927084 | 7.777820555 | 9.571423859 | 9.520349595 | 7.673788527 | 8.726624811 | 8.579230345 | 7.552401419 |             |
| SH2D3C   | 9.28539733  | 9.012108233 | 9.684827747 | 8.938537008 | 8.556396126 | 8.845812112 | 8.277458506  | 8.15234399  | 9.269325298 | 8.555149227 | 7.971181128 | 8.62230014  | 8.618393968 | 8.988594124 | 7.624586647 | 8.671134252 | 8.161809176 | 8.25469036  |
| COL9A    | 9.04369761  | 9.016511149 | 9.683295088 | 9.160137608 | 7.998793314 | 8.798736626 | 8.104461986  | 8.077644879 | 9.013295087 | 8.49939456  | 9.026996554 | 9.241193703 | 5.811223543 | 8.182668001 | 8.370432066 | 8.386120506 | 8.36323434  |             |
| ARRP1    | 8.772804969 | 8.204285932 | 8.78269989  | 8.645239676 | 7.739792055 | 8.678953202 | 8.415430975  | 8.487204005 | 8.61351126  | 8.28787898  | 8.248644068 | 9.050067658 | 9.241517073 | 8.486778922 | 8.385082309 | 8.301485638 | 8.78172178  |             |
| ICM7     | 9.384006978 | 7.829307707 | 8.929307707 | 8.132117779 | 8.95260979  | 7.910451111 | 8.019137674  | 8.448657722 | 8.666012153 | 8.557130087 | 8.036340763 | 9.129634876 | 9.113443601 | 8.634572972 | 8.560416695 | 8.899513737 | 7.91308203  | 8.54588902  |
| MPS18C   | 8.528750914 | 8.28456123  | 8.61640931  | 8.64932044  | 8.588273942 | 9.146907008 | 8.666261322  | 8.109162516 | 8.301220605 | 8.876126106 | 8.37717664  | 8.710337802 | 9.93800535  | 8.300522547 | 8.646202759 | 8.449603426 | 8.391595985 | 8.62888977  |
| MRLP27   | 8.570482838 | 8.131658288 | 8.420964095 | 8.843796417 | 8.89549773  | 8.706126104 | 8.632735208  | 8.382665739 | 8.608594922 | 8.169547494 | 8.36316084  | 8.897490549 | 8.853799884 | 8.534744738 | 8.132386696 | 8.39721204  | 8.295403916 | 8.546187991 |
| GLRX3    | 8.89866941  | 8.736475216 | 8.260599236 | 9.04004572  | 8.956459152 | 9.000502855 | 9.148898962  | 8.570602716 | 8.697091747 | 8.34843804  | 8.393539104 | 8.399537467 | 7.569406234 | 8.048014076 | 8.282192853 | 8.480013956 | 8.541588005 | 9.031489056 |
| PP2R2A   | 8.761231458 | 8.353016167 | 8.67935202  | 8.536065813 | 8.981967289 | 8.607692919 | 8.729313525  | 8.578374206 | 8.536065813 | 7.973937423 | 8.37717664  | 8.710337802 | 9.93800535  | 8.300522547 | 8.646202759 | 8.449603426 | 8.391595985 | 8.62888977  |
| DCFA7    | 8.005753006 | 7.706140926 | 8.80785816  | 7.774071886 | 9.149511921 | 8.879623218 | 9.210580904  | 8.237054126 | 8.609614641 | 8.443358788 | 8.894520626 | 8.589226524 | 7.976439249 | 8.70239156  | 8.283592862 | 8.439718042 | 8.52373865  | 8.712554998 |
| APOL2    | 8.136627675 | 8.753540057 | 8.675789997 | 8.33942074  | 8.545087568 | 8.91196228  | 8.964654634  | 8.624664374 | 8.77144497  | 9.04954056  | 8.368451365 | 8.315086997 | 7.623644616 | 8.049858712 | 8.706614487 | 8.405709318 | 9.064948486 | 8.309887838 |
| ICM7     | 8.284006978 | 7.829307707 | 8.929307707 | 8.132117779 | 8.95260979  | 7.910451111 | 8.019137674  | 8.448657722 | 8.666012153 | 8.557130087 | 8.036340763 | 9.129634876 | 9.113443601 | 8.634572972 | 8.560416695 | 8.899513737 | 7.91308203  | 8.54588902  |
| ITGE     | 8.605858696 | 9.09315056  | 8.6232616   | 8.30068381  | 8.97700863  | 8.730510086 | 8.173980584  | 8.41463731  | 8.37052602  | 8.21962801  | 8.441463731 | 8.37052602  | 8.8067621   | 8.6675427   | 7.99873845  | 8.23720606  | 8.200496620 | 8.59596529  |
| GA3      | 8.647476869 | 8.136727106 | 9.071712568 | 9.10392622  | 8.428167123 | 8.592019613 | 7.228340345  | 6.618366811 | 8.231251827 | 8.47968924  | 8.89651465  | 8.582647411 | 8.159913453 | 7.073748547 | 8.735120136 | 8.528826048 | 8.38237048  | 8.586335559 |
| FAM101B  | 8.822139787 | 8.8752011   | 8.922342073 | 8.564084749 | 8.19789454  | 8.939081791 | 8.316306065  | 8.67116204  | 8.57903113  | 8.016785808 | 8.677041104 | 8.272416365 | 8.350412812 | 8.039970667 | 8.54128811  | 8.039970667 | 7.979792623 |             |
| ELF2     | 8.98666215  | 8.297466116 | 8.000482733 | 9.055926892 | 8.600547259 | 7.577864242 | 8.768503301  | 8.811030283 | 8.550102837 | 8.357325832 | 8.305611891 | 8.037054049 | 8.86052166  | 8.367249707 | 8.016560628 | 8.822675403 | 8.342208885 | 8.307233583 |
| RCHY1    | 8.20657145  | 8.994387868 | 8.477631725 | 8.592625685 | 8.234572666 | 9.362102263 | 8.635043177  | 8.440485787 | 8.570923162 | 8.963236694 | 7.951458148 | 8.529616476 | 8.539201324 | 8.611430583 | 8.406149785 | 8.53207885  | 8.122195192 |             |
| VEGF8    | 8.550193029 | 8.631578067 | 8.646659077 | 8.289842715 | 8.77040454  | 8.897481106 | 8.741882737  | 8.559246531 | 8.689813461 | 8.326108011 | 8.61247248  | 8.661992607 | 8.333752595 | 8.480082931 | 7.967592181 | 8.456208988 | 8.519102677 | 8.95466582  |
| ICM7     | 8.284006978 | 7.829307707 | 8.929307707 | 8.132117779 | 8.95260979  | 7.910451111 | 8.019137674  | 8.448657722 | 8.666012153 | 8.557130087 | 8.036340763 | 9.129634876 | 9.113443601 | 8.634572972 | 8.560416695 | 8.899513737 | 7.91308203  | 8.54588902  |
| EPB12L   | 9.059748231 | 8.968306259 | 8.535907308 | 8.725836618 | 8.896957043 | 7.919708337 | 8.985413423  | 8.539193283 | 8.323085098 | 8.479860355 | 8.504137613 | 9.341738839 | 9.20042369  | 8.193740247 | 8.348341448 | 8.481253238 | 8.552366839 | 8.592395848 |
| CND3     | 9.50817307  | 9.380928394 | 9.063874764 | 8.760562198 | 8.179045127 | 8.819052248 | 8.824501566  | 8.523558573 | 8.523558573 | 8.591167093 | 8.720079394 | 8.08792263  | 9.193665304 | 8.869198174 | 8.421188964 | 8.09825154  | 8.713768094 |             |
| UBR7     | 8.552510101 | 8.659746302 | 9.027310561 | 8.911845543 | 8.570668727 | 7.396691499 | 8.750876645  | 8.736622062 | 8.590331845 | 8.367092344 | 8.696030226 | 8.376852418 | 8.553777049 | 8.513731399 | 8.148792931 | 8.375976776 | 8.274896119 | 8.089364125 |
| DHRX5    | 9.344023502 | 8.93642872  | 8.940691751 | 8.721395278 | 8.540621657 | 8.556394679 | 8.798325182  | 8.549320517 | 8.549320517 | 8.549320517 | 8.549320517 | 8.549320517 | 8.549320517 | 8.549320517 | 8.549320517 | 8.549320517 | 8.549320517 | 8.549320517 |
| GRPE11   | 9.033993461 | 8.173945664 | 9.318997413 | 8.683904071 | 8.563503124 | 9.520939218 | 8.809403312  | 8.448042727 | 8.948546971 | 8.317010798 | 8.492457265 | 9.0541711   | 8.30585482  | 7.8299672   | 8.664119181 | 8.002807888 | 8.066778638 | 8.541100425 |
| GAPB     | 8.645140612 | 8.039396668 | 8.56571106  | 8.388098397 | 9.203803694 | 7.706796313 | 8.487481614  | 8.356088012 | 8.65688012  | 9.020515203 | 8.547982127 | 7.646774225 | 7.396424665 | 8.02319048  | 9.141387768 | 8.28126884  | 8.171329966 |             |
| ICM7     | 8.284006978 | 7.829307707 | 8.929307707 | 8.132117779 | 8.95260979  | 7.910451111 | 8.019137674  | 8.448657722 | 8.666012153 | 8.557130087 | 8.036340763 | 9.129634876 | 9.113443601 | 8.634572972 | 8.56        |             |             |             |

|         |             |             |             |             |             |             |             |             |             |             |             |             |             |             |             |             |             |             |
|---------|-------------|-------------|-------------|-------------|-------------|-------------|-------------|-------------|-------------|-------------|-------------|-------------|-------------|-------------|-------------|-------------|-------------|-------------|
| DHRS1   | 8.801990202 | 9.046715175 | 8.479389752 | 8.675460355 | 8.550674088 | 8.762074713 | 7.979276358 | 8.647817655 | 8.495717855 | 8.531181204 | 8.382437216 | 8.518718556 | 8.205775681 | 8.301367629 | 8.487421236 | 8.647440654 | 8.409034427 | 8.767019762 |
| OSBP10  | 8.892001609 | 8.799983968 | 8.589116079 | 8.460438066 | 8.946594520 | 7.934806246 | 7.780570305 | 8.460439888 | 8.636041978 | 8.861026265 | 8.655463785 | 7.585756181 | 8.903298344 | 8.680846485 | 8.238509806 | 8.679458545 | 8.296884567 | 8.248082107 |
| TV2P3C  | 8.167551145 | 8.18422877  | 8.839493497 | 8.215378654 | 8.565299822 | 8.766014166 | 8.667350787 | 8.484199875 | 8.050568006 | 8.659169993 | 8.762157521 | 8.382342578 | 8.247897562 | 8.931003689 | 8.532894051 | 8.328945055 | 8.668709699 | 8.378454583 |
| SEDT3   | 9.353225651 | 8.014180412 | 9.140599101 | 8.905851421 | 8.703337092 | 8.472254955 | 8.512023841 | 8.211327927 | 8.695397488 | 8.487671024 | 8.805610529 | 8.275182084 | 8.538718461 | 8.22176218  | 7.988537781 | 8.631117179 | 8.980938449 | 8.809038489 |
| EHK1    | 7.631897694 | 8.215786593 | 8.08636174  | 8.053048099 | 8.144970763 | 7.948943317 | 8.539282585 | 8.057282565 | 8.001668655 | 8.089504041 | 7.80910839  | 8.683235415 | 7.929422625 | 8.019558051 | 8.50891206  | 8.361748912 | 8.641791463 | 8.375556367 |
| PCD1    | 8.65289888  | 8.356812029 | 8.382367474 | 8.581067292 | 8.425062007 | 8.46473093  | 8.46473093  | 8.367365727 | 8.956806223 | 8.437660223 | 8.94429286  | 8.25762387  | 8.542463853 | 8.100870766 | 8.452557039 | 8.64123398  | 8.50510425  | 8.50510425  |
| MRP52   | 8.757527773 | 8.787588799 | 7.44667474  | 8.53879251  | 8.508262249 | 8.69114742  | 8.772729044 | 7.989170702 | 8.307357298 | 8.100412834 | 8.400417729 | 8.600005703 | 8.844141983 | 8.143074702 | 8.08634613  | 8.124537732 | 8.190306161 | 8.732097099 |
| WRD5    | 8.686289469 | 7.929911155 | 8.78694987  | 8.786286497 | 8.905212743 | 8.980521743 | 8.440534796 | 8.440534796 | 8.797321564 | 8.429414307 | 8.233716945 | 8.568827592 | 8.142512758 | 8.764136502 | 8.476601573 | 8.322209247 | 8.136553152 | 8.185880009 |
| ANAP4C  | 8.250346078 | 9.030657918 | 9.152408866 | 7.062363172 | 9.56308993  | 8.820259798 | 8.490410755 | 8.147779925 | 8.481406472 | 8.514034643 | 8.484031302 | 8.431620803 | 8.788159104 | 9.35591398  | 8.700268853 | 8.624756509 | 8.425143933 | 8.503486743 |
| CWC22   | 9.388459549 | 9.015752782 | 7.264712344 | 8.612316679 | 9.230118773 | 8.459224899 | 9.663199353 | 8.44346734  | 8.578390978 | 8.243140686 | 8.565958724 | 8.397313859 | 9.071244822 | 8.959058802 | 8.127977584 | 8.478674393 | 8.821280853 | 8.282280853 |
| ANGEL2  | 8.485365646 | 7.800194275 | 8.25656746  | 8.853015683 | 7.399830213 | 8.547382743 | 8.718165343 | 8.484299336 | 8.25546442  | 8.78445719  | 8.05618856  | 7.77767678  | 8.126793083 | 8.973218279 | 8.494430943 | 8.580297245 | 8.700527245 | 8.700527245 |
| CMAS    | 8.60246648  | 8.202238862 | 7.441451644 | 8.099151103 | 8.895737607 | 8.573133102 | 8.420934094 | 8.526918528 | 8.074260522 | 8.363949589 | 8.537144241 | 8.627194066 | 8.077746778 | 8.153919588 | 7.900448801 | 8.504292574 | 8.966318131 | 8.966318131 |
| SPTAN1  | 8.721932575 | 8.300738394 | 8.233019742 | 8.233019742 | 8.233019742 | 8.329417747 | 8.501150841 | 9.343676928 | 7.936560136 | 8.086028513 | 8.219535557 | 8.409107063 | 8.112643526 | 8.370988902 | 9.003210926 | 8.977664629 | 8.30119828  | 8.30119828  |
| FANGC   | 8.551340483 | 7.229420037 | 8.743373929 | 8.340273239 | 7.689349706 | 8.710431628 | 8.056293815 | 8.712969041 | 7.72807886  | 8.756115534 | 8.228512509 | 8.486361434 | 8.22057078  | 8.325031883 | 8.25407641  | 8.671226021 | 8.409420314 | 8.756038579 |
| DR1     | 9.15602443  | 8.105097741 | 8.505772471 | 8.80173988  | 8.854656029 | 8.627043435 | 8.451023404 | 8.627043435 | 8.145103232 | 8.456151118 | 8.374739522 | 8.607285409 | 7.846655662 | 8.25364399  | 8.577164681 | 8.853279391 | 8.808585532 | 8.808585532 |
| CLN3    | 9.1719409   | 8.104306287 | 8.304627393 | 8.297612191 | 8.142933572 | 8.301297331 | 9.361079823 | 8.918491488 | 8.2472919   | 8.291232322 | 8.456151118 | 8.374739522 | 8.607285409 | 7.846655662 | 8.25364399  | 8.577164681 | 8.853279391 | 8.808585532 |
| DRG2    | 8.732603268 | 8.096435472 | 7.898145252 | 8.689649833 | 9.020260088 | 8.430364008 | 8.430364008 | 8.415849553 | 8.608740606 | 8.366527177 | 8.52109502  | 9.040360562 | 8.623937068 | 8.627431141 | 8.281019162 | 8.535429184 | 8.579650224 | 8.503202284 |
| GRAMD1A | 8.563924499 | 9.020762214 | 8.359870575 | 8.628152968 | 8.237023268 | 8.870977854 | 8.430715069 | 8.616636686 | 8.668174805 | 8.522051393 | 8.56815437  | 8.350939231 | 8.852759367 | 8.824201507 | 8.351353576 | 8.50914393  | 8.48711461  | 8.363898989 |
| RRB5    | 8.30810183  | 7.835764773 | 9.051118065 | 8.556678816 | 7.765847106 | 8.816930394 | 8.105109872 | 8.585310509 | 8.278156574 | 8.720740239 | 8.473483947 | 8.633103442 | 9.634618842 | 8.338103663 | 8.795690039 | 8.356071966 | 8.360623001 | 8.360623001 |
| CD2C2A  | 9.531465653 | 8.896468974 | 8.687196146 | 8.629689992 | 8.737294012 | 8.685596755 | 8.105109872 | 8.352914862 | 8.37125762  | 8.487260289 | 8.196585159 | 8.688727711 | 7.799422028 | 8.493764076 | 8.038810059 | 8.547368364 | 8.118375355 | 8.404140216 |
| DRAN1   | 7.937513088 | 8.359634004 | 8.400698701 | 8.522575052 | 9.107025207 | 8.669033889 | 8.669033889 | 8.285934466 | 8.087643455 | 8.898194283 | 8.197788189 | 8.205168116 | 8.130554002 | 8.974394008 | 8.755743543 | 9.010716847 | 8.077868636 | 8.077868636 |
| MAP3K11 | 8.375516137 | 8.440265663 | 7.755376014 | 8.442455781 | 8.17050135  | 8.925523403 | 8.888556515 | 8.504483606 | 8.44832573  | 8.552548498 | 8.719655023 | 8.519962893 | 8.678234884 | 8.600175838 | 8.50779174  | 8.345251255 | 8.639230799 | 8.639230799 |
| VP57A   | 8.198194415 | 9.543191945 | 8.369412607 | 8.188994317 | 8.645510661 | 8.340170604 | 8.488768675 | 8.106689490 | 8.706823267 | 8.549007681 | 8.470673548 | 8.593665046 | 9.6351548   | 8.26151135  | 8.807867032 | 8.538470039 | 8.112421402 | 8.103384004 |
| DPM3    | 8.045976471 | 8.638882442 | 8.253953419 | 8.413647652 | 9.131016893 | 8.659932813 | 8.148482482 | 8.71093281  | 8.148482482 | 8.564947234 | 8.338200997 | 8.922173737 | 8.531529568 | 8.356754427 | 8.365664496 | 8.572709159 | 8.488041333 | 8.488041333 |
| ICE1    | 8.389140282 | 8.308246625 | 8.400302382 | 8.389849600 | 9.030672101 | 9.01914342  | 8.099993672 | 8.970292176 | 7.98929106  | 8.815953251 | 7.484877848 | 8.635408263 | 8.244969084 | 7.070894372 | 8.194809049 | 8.669516049 | 8.634955437 | 8.184541606 |
| TSWG1   | 8.466941053 | 8.322663636 | 9.488925471 | 8.730718559 | 8.750452355 | 8.552926618 | 8.463133487 | 8.312177053 | 8.815746897 | 8.850952308 | 9.274719166 | 8.57034507  | 7.75964826  | 8.470890333 | 7.965823975 | 8.866919079 | 8.436754407 | 8.40676698  |
| ELMSAN1 | 8.619012003 | 8.724382034 | 9.084496614 | 8.720218724 | 8.595577222 | 8.25840907  | 7.912298619 | 8.808287295 | 8.698254252 | 8.538630848 | 8.961158687 | 8.256273391 | 8.039986151 | 8.038111555 | 8.229710509 | 8.443236036 | 8.401934698 | 8.016570931 |
| WRAP3   | 8.193498012 | 8.464660974 | 8.764396157 | 8.368309594 | 8.246333216 | 8.35256565  | 8.945378222 | 8.281737553 | 8.281737553 | 8.664692157 | 8.664692157 | 8.069502079 | 8.832785411 | 8.772449914 | 8.504537395 | 8.530123285 | 8.345966614 | 8.68775132  |
| MPPE1   | 8.748094712 | 8.379997299 | 7.286950733 | 8.655913898 | 8.08986012  | 8.56846773  | 8.358981375 | 8.521903177 | 8.544690929 | 8.502401269 | 8.366515639 | 8.463117652 | 8.556448957 | 8.515240602 | 8.730951468 | 8.382180439 | 8.495213927 | 8.526482805 |
| CUL2    | 7.770474664 | 8.874484824 | 8.73660555  | 8.399332425 | 8.775078107 | 8.963994435 | 8.605650966 | 8.211570414 | 8.63236849  | 8.450846927 | 8.583394665 | 8.451783075 | 8.756250744 | 8.565158427 | 8.305518202 | 8.234139367 | 8.381789197 | 8.381789197 |
| AEBP2   | 8.92273466  | 7.842833363 | 8.108823039 | 9.042127835 | 8.263142612 | 8.678462815 | 9.005716549 | 8.081161182 | 8.61019111  | 8.406467903 | 8.256586232 | 8.262993112 | 8.879378136 | 8.793147681 | 8.07304736  | 6.99233416  | 8.619219015 | 8.38873744  |
| PHACTRA | 8.992923988 | 8.598760913 | 7.349717809 | 8.280357847 | 8.455000414 | 8.269167896 | 8.157480311 | 8.629330864 | 8.574939615 | 8.546981232 | 8.656573715 | 8.419370885 | 7.264652456 | 8.497822475 | 8.673725542 | 8.430535248 | 8.172049816 | 8.172049816 |
| BRP3    | 8.157094161 | 9.049052862 | 8.513479701 | 8.649308337 | 7.862518979 | 8.538847563 | 8.767006767 | 8.594164882 | 8.501595558 | 8.387479257 | 8.816852798 | 8.356043804 | 7.206991004 | 7.840719637 | 8.638433469 | 8.719306374 | 8.867373763 | 8.183379764 |
| LDH     | 9.13172484  | 8.620193551 | 8.620193551 | 8.620193551 | 8.620193551 | 8.620193551 | 8.620193551 | 8.620193551 | 8.620193551 | 8.620193551 | 8.620193551 | 8.620193551 | 8.620193551 | 8.620193551 | 8.620193551 | 8.620193551 | 8.620193551 | 8.620193551 |
| BAZ1A   | 7.648590267 | 7.648590267 | 7.648590267 | 7.648590267 | 7.648590267 | 7.648590267 | 7.648590267 | 7.648590267 | 7.648590267 | 7.648590267 | 7.648590267 | 7.648590267 | 7.648590267 | 7.648590267 | 7.648590267 | 7.648590267 | 7.648590267 | 7.648590267 |
| ACS     | 8.504729552 | 9.050737684 | 8.496807009 | 8.119879707 | 8.091203627 | 8.438240671 | 9.112872568 | 8.767839012 | 8.179148303 | 8.94046522  | 8.256813934 | 8.08238184  | 8.389032428 | 8.301753888 | 8.666850146 | 8.507357678 | 8.211700156 | 8.981614899 |
| PACS2   | 9.106371955 | 8.870413693 | 8.870413693 | 8.870413693 | 8.870413693 | 8.870413693 | 8.870413693 | 8.870413693 | 8.870413693 | 8.870413693 | 8.870413693 | 8.870413693 | 8.870413693 | 8.870413693 | 8.870413693 | 8.870413693 | 8.870413693 | 8.870413693 |
| SKVZ1   | 8.479731429 | 8.100400388 | 8.355746593 | 8.580842564 | 8.469159606 | 8.296563744 | 8.816286432 | 8.119737812 | 8.529961122 | 8.224481383 | 8.742364195 | 8.717250396 | 8.929728291 | 8.811971211 | 8.436404105 | 8.664188241 | 8.030813153 | 8.030813153 |
| DCAF6   | 7.947674728 | 9.356254245 | 8.926187614 | 8.280357847 | 8.455000414 | 8.269167896 | 8.157480311 | 8.629330864 | 8.574939615 | 8.546981232 | 8.656573715 | 8.419370885 | 7.264652456 | 8.497822475 | 8.673725542 | 8.430535248 | 8.172049816 | 8.172049816 |
| CNOT4   | 8.411601114 | 9.261972526 | 7.156166376 | 8.244800144 | 8.594460658 | 7.784362354 | 9.11531412  | 8.660388989 | 8.509605701 | 8.831778985 | 8.260352954 | 9.07329054  | 7.360272973 | 8.730723793 | 8.649163192 | 8.794049698 | 8.413976589 | 8.649163192 |
| VAMP7   | 8.439030182 | 9.221908864 | 9.221908864 | 9.221908864 | 9.221908864 | 9.221908864 | 9.221908864 | 9.221908864 | 9.221908864 | 9.221908864 | 9.221908864 | 9.221908864 | 9.221908864 | 9.221908864 | 9.221908864 | 9.221908864 | 9.221908864 | 9.221908864 |
| NR3C1   | 8.246332085 | 8.067412966 | 8.067412966 | 8.067412966 |             |             |             |             |             |             |             |             |             |             |             |             |             |             |

|            |             |             |             |             |             |             |             |             |              |             |              |             |             |             |             |             |             |             |
|------------|-------------|-------------|-------------|-------------|-------------|-------------|-------------|-------------|--------------|-------------|--------------|-------------|-------------|-------------|-------------|-------------|-------------|-------------|
| CDK7       | 9.16701289  | 8.13412621  | 8.750576007 | 8.591278434 | 8.692843039 | 8.717847221 | 8.795604553 | 7.706335014 | 8.480484705  | 7.79126215  | 8.7820587012 | 8.480392747 | 9.539036878 | 7.223716399 | 8.283435033 | 7.809954046 | 7.939815682 | 8.4067009   |
| NP18A      | 8.598360244 | 7.502252431 | 8.601315768 | 8.362123217 | 7.977349176 | 7.594006628 | 8.262362741 | 8.660971297 | 8.181666302  | 9.444573718 | 8.148953418  | 8.047000666 | 8.05093206  | 8.634667397 | 9.037688257 | 8.957425209 | 9.6019962   | 8.61792085  |
| ZBT87A     | 9.193429467 | 9.043625926 | 9.043625926 | 8.344611298 | 8.814829271 | 8.39555823  | 8.782786099 | 8.2999825   | 8.687434297  | 8.549318518 | 8.70864442   | 7.536903266 | 9.79659723  | 9.007188065 | 8.294751102 | 8.501011786 | 7.974936345 | 8.10275741  |
| OVCA2      | 8.765835445 | 8.796025209 | 8.530411396 | 8.384140263 | 8.76161979  | 8.783759323 | 8.310869371 | 8.464079136 | 8.494647294  | 8.494647294 | 8.47952527   | 8.85248661  | 8.03807421  | 8.43313483  | 8.388936131 | 8.568500304 | 8.181446664 | 8.27795815  |
| EMC3       | 8.506809654 | 8.548637864 | 8.658801861 | 8.658801861 | 8.704862939 | 8.340296629 | 8.340296629 | 8.340296629 | 8.340296629  | 8.340296629 | 8.456801861  | 8.523366629 | 8.539828744 | 8.539828744 | 8.509730739 | 8.353997583 | 8.50677036  | 8.50677036  |
| LCMT1      | 8.823836119 | 8.71127078  | 8.902877048 | 8.45859982  | 8.72378414  | 8.72378414  | 8.72378414  | 8.72378414  | 8.72378414   | 8.72378414  | 8.680647073  | 8.75181977  | 8.84092179  | 7.72049323  | 8.151309491 | 8.35957694  | 8.73332567  | 8.45345669  |
| MED22      | 8.724093934 | 8.37108285  | 8.543321253 | 8.02763403  | 7.91893177  | 8.08202435  | 8.645529744 | 8.108817986 | 8.719233674  | 8.55757805  | 8.45959223   | 8.223434052 | 8.52884307  | 8.802376946 | 8.502749684 | 8.2172747   | 8.232850616 | 8.105156206 |
| ASL        | 8.782327683 | 9.325434    | 8.46327683  | 8.925434    | 8.025938192 | 8.250938192 | 8.025938192 | 8.025938192 | 8.025938192  | 8.025938192 | 8.46189285   | 8.219514484 | 8.497399706 | 8.153832087 | 8.513686157 | 8.123252704 | 8.303581383 | 8.025938192 |
| SESN2      | 8.12360117  | 9.288681929 | 8.881733847 | 8.957967242 | 8.665021174 | 8.861093092 | 8.01815559  | 7.56993356  | 8.442981285  | 7.798452673 | 9.032309867  | 8.190681884 | 8.48918585  | 8.745391124 | 7.98320844  | 8.46744014  | 7.9344575   | 8.743130058 |
| PP1R35     | 9.071761525 | 8.148833218 | 8.148833218 | 8.77015488  | 8.04787228  | 8.565925355 | 8.65925355  | 8.04787228  | 8.04787228   | 8.04787228  | 8.03211816   | 8.514700554 | 9.141671835 | 9.220050433 | 8.382592286 | 8.433113957 | 8.38681844  | 8.300830018 |
| PKRA62     | 8.328018447 | 8.519274048 | 8.519274048 | 8.956306691 | 8.605933093 | 8.01032493  | 8.854267684 | 8.641788985 | 8.35635696   | 8.179248661 | 7.707421502  | 8.301036424 | 8.596620704 | 8.448902704 | 8.19543929  | 8.441739305 | 8.60012877  | 8.743011482 |
| RECLD      | 8.285668687 | 7.975510733 | 7.984482691 | 8.956806205 | 8.956806205 | 8.028749662 | 7.917238451 | 8.172688081 | 8.727011106  | 8.593551655 | 8.510875303  | 8.911291867 | 8.81951432  | 9.437534654 | 8.364480806 | 8.705064789 | 8.44174925  | 8.96416488  |
| RP11.343C2 | 8.703094165 | 9.134037884 | 9.000653028 | 8.73725369  | 8.47515883  | 8.932843551 | 8.29354678  | 8.334091547 | 8.29354678   | 8.29354678  | 8.276550288  | 8.660348627 | 8.566078277 | 9.04084747  | 8.22994667  | 8.12571223  | 8.03652535  | 8.24971627  |
| ATP10D     | 7.551356724 | 8.76917439  | 8.11043111  | 8.962652234 | 8.806614658 | 8.440485871 | 8.238863968 | 8.84549062  | 8.510912136  | 8.308430668 | 8.04217764   | 7.959578842 | 7.443340056 | 8.780412049 | 9.077944418 | 8.65681519  | 8.218685759 | 8.218685759 |
| P1TFM1     | 8.31426324  | 6.309128279 | 8.61418209  | 8.08744528  | 8.400878478 | 8.57420516  | 8.62312161  | 8.459444583 | 8.86289464   | 8.899507741 | 8.134540004  | 8.40432901  | 8.123792839 | 8.834863005 | 8.318923509 | 8.800328916 | 8.489255683 | 8.489255683 |
| GMPS       | 8.450832325 | 6.007521409 | 8.84466955  | 8.948667251 | 7.50952114  | 9.004171843 | 8.994870684 | 8.496747261 | 9.333609304  | 8.320461234 | 8.55354587   | 8.662386841 | 8.064217559 | 7.86372628  | 8.337551193 | 8.808282853 | 7.858910884 | 8.68489323  |
| E1FAD      | 8.425749543 | 8.16510857  | 8.864517429 | 8.861868605 | 8.331190282 | 8.435058735 | 8.580242155 | 8.57045521  | 8.269898256  | 8.526538525 | 8.142950493  | 9.252257126 | 8.41255121  | 8.623056567 | 8.491604275 | 8.21609684  | 8.456566622 | 8.456566622 |
| ATP8A      | 6.653253792 | 7.16194227  | 7.078106516 | 8.52719808  | 7.995788396 | 9.017764447 | 7.981848005 | 8.210641373 | 8.636615664  | 8.420659553 | 8.715919109  | 8.317308653 | 8.985608082 | 8.273180934 | 8.848313862 | 8.798525133 | 8.605038021 | 8.605038021 |
| GNB3       | 8.905834971 | 9.05218436  | 7.718132608 | 8.96732353  | 8.446515165 | 8.591343169 | 8.85666943  | 8.497028946 | 8.803508512  | 8.381246739 | 8.396827157  | 8.70542772  | 8.047699304 | 8.856019827 | 8.369884902 | 8.10125347  | 8.1284173   | 8.1284173   |
| CDG        | 9.087942914 | 8.52581353  | 7.756232261 | 8.514568316 | 8.468289458 | 8.026212616 | 8.60798833  | 8.216172817 | 8.74337816   | 8.351618724 | 7.98546008   | 8.627932235 | 8.866889848 | 8.98217484  | 8.988382026 | 8.65716214  | 8.391585305 | 8.1269453   |
| SLCS3A     | 8.354649994 | 9.129319475 | 8.076545088 | 8.75615217  | 8.809894165 | 7.985387315 | 8.444352681 | 8.444352681 | 8.444352681  | 8.444352681 | 8.077166471  | 8.031210488 | 7.107777329 | 8.951055469 | 8.432594372 | 8.641105027 | 8.016503123 | 8.016503123 |
| GPATH2L    | 8.053979864 | 6.364880509 | 7.93389505  | 9.38584742  | 8.287731469 | 8.49122976  | 8.06222844  | 8.127089198 | 8.043736559  | 8.59389705  | 8.74980533   | 8.803975393 | 8.112327727 | 8.52086048  | 8.420810023 | 8.86895215  | 8.86895215  | 8.86895215  |
| DIAPH1     | 8.564318826 | 8.872166239 | 8.21006091  | 8.075891034 | 8.307488832 | 8.45794617  | 8.701501952 | 8.751463492 | 8.284135923  | 8.400998903 | 8.291472912  | 8.770553027 | 8.372440949 | 8.095096145 | 8.598324276 | 8.483079431 | 8.42029224  | 8.542769318 |
| ADH15A     | 8.241534921 | 8.353498761 | 8.134569137 | 8.134569137 | 8.32886898  | 8.920118423 | 8.32886898  | 8.920118423 | 8.920118423  | 8.920118423 | 8.697584734  | 8.398718642 | 8.10212141  | 8.546450646 | 8.519285978 | 8.10788361  | 8.400153613 | 8.093506280 |
| LRBA       | 8.128405853 | 8.298705486 | 8.092885853 | 7.102749135 | 8.739945173 | 8.358576795 | 8.375473697 | 8.580046663 | 8.431156034  | 8.531607454 | 8.620506984  | 7.710579413 | 8.402897351 | 8.811216039 | 8.15943137  | 8.379093268 | 8.595468856 | 8.572647178 |
| RRM18      | 8.413019306 | 8.849813038 | 8.348242177 | 8.20429333  | 8.780278122 | 8.659593925 | 8.758914769 | 8.148698667 | 8.12803393   | 8.26130315  | 8.226450912  | 8.999314912 | 8.466438665 | 8.830648406 | 8.47113094  | 8.25734806  | 8.685453923 | 8.570887078 |
| NPA1       | 8.822657442 | 8.50154045  | 8.225950638 | 8.342038903 | 8.23303675  | 8.324149296 | 8.500466312 | 8.235211118 | 8.436552327  | 8.533874975 | 9.127605057  | 7.741612935 | 10.09847239 | 6.71523236  | 8.50066393  | 8.75451228  | 8.12733817  | 9.240993284 |
| EMC2       | 8.205901655 | 8.364098852 | 8.59013216  | 8.75901171  | 8.904619568 | 8.444619568 | 8.444619568 | 8.444619568 | 8.444619568  | 8.444619568 | 8.57901171   | 8.904619568 | 8.50247375  | 9.141003316 | 8.59145446  | 8.141003316 | 8.59145446  | 8.59145446  |
| PIA3       | 8.934505966 | 8.293917162 | 8.5068938   | 8.34076698  | 8.505296859 | 7.94938652  | 8.551927706 | 8.248051333 | 8.554611177  | 8.327874975 | 8.938701587  | 8.240410193 | 8.899244602 | 8.910732039 | 8.800563736 | 8.80954379  | 8.72766262  | 8.989898629 |
| GSTM4      | 8.451105292 | 8.824911087 | 9.247373083 | 8.342903263 | 8.360544481 | 8.51843841  | 8.738270122 | 8.662881726 | 8.326826819  | 8.298114218 | 8.272333784  | 8.156166938 | 7.724129482 | 8.724642937 | 8.749045833 | 8.482285102 | 8.530042068 | 8.133039446 |
| MTHF5      | 8.722815586 | 8.527335946 | 8.648367662 | 8.527335946 | 8.449716282 | 8.13295842  | 8.483432421 | 8.616285112 | 8.51178531   | 8.1494744   | 8.235269477  | 9.306774196 | 8.658436932 | 7.60330212  | 7.758394542 | 8.014410694 | 8.107595465 | 8.107595465 |
| DDX55      | 8.954136197 | 8.8685546   | 8.584975207 | 7.927933522 | 8.971946654 | 8.865143065 | 7.680406965 | 8.366933714 | 8.234721656  | 8.026390881 | 8.450309218  | 8.646856742 | 9.325555882 | 8.428459922 | 8.482420921 | 8.315862807 | 8.180051163 | 8.081266371 |
| KANS12     | 8.594594755 | 8.601516907 | 8.65147848  | 8.279812027 | 8.493574851 | 8.870173482 | 8.108747644 | 8.344258654 | 8.408774644  | 8.41889173  | 8.34454114   | 8.671256118 | 8.583411002 | 8.331163019 | 8.547549946 | 8.25887155  | 8.371210813 | 8.49701113  |
| STX10      | 8.611637042 | 9.259159704 | 7.795891851 | 8.493585244 | 8.189497273 | 8.694795927 | 8.618599061 | 8.484979144 | 8.445970275  | 8.415688274 | 8.313649097  | 8.807910813 | 9.361029665 | 8.887299964 | 8.275711607 | 8.360650357 | 8.217590248 | 8.15247463  |
| TE2        | 8.76011976  | 8.02840262  | 7.792737848 | 9.106509295 | 7.291297348 | 8.953079593 | 8.097765335 | 8.438990507 | 8.300136023  | 8.355996602 | 8.70308279   | 8.28494077  | 8.46345741  | 7.54903949  | 8.372080548 | 8.45716354  | 8.228555439 | 8.320670236 |
| GLOD4      | 8.427478212 | 8.389348782 | 8.80241264  | 8.80241264  | 8.80241264  | 8.80241264  | 8.80241264  | 8.80241264  | 8.80241264   | 8.80241264  | 8.175094987  | 8.15548628  | 8.970828014 | 8.403302541 | 8.403302541 | 8.46266399  | 8.84266399  | 8.84266399  |
| GATC       | 8.402107109 | 7.228210981 | 8.306297018 | 8.78338989  | 7.583107024 | 8.91657398  | 8.140770788 | 8.172501111 | 8.654016584  | 8.97631034  | 8.5996047    | 8.185404072 | 8.495678895 | 8.238575762 | 8.434031875 | 8.929092827 | 8.621503542 | 8.602390146 |
| STOM       | 8.462213235 | 9.70498615  | 9.602966862 | 8.80255231  | 8.401159224 | 8.411292532 | 8.05774223  | 8.411292532 | 8.05774223   | 8.05774223  | 8.472071769  | 8.517531696 | 7.943594016 | 8.291626475 | 8.420054335 | 8.628290678 | 8.236891328 | 8.19336808  |
| TMEM57     | 8.69096606  | 8.774042085 | 8.426685752 | 8.893133585 | 8.496771658 | 8.906287403 | 8.586987881 | 8.378188891 | 8.204149508  | 8.301906457 | 8.432612864  | 8.49783332  | 8.874089567 | 8.920484949 | 8.267559351 | 8.569056244 | 8.235600195 | 8.034009807 |
| GSAP       | 8.442841852 | 8.652483578 | 7.777302129 | 8.652483578 | 8.187325785 | 8.371734117 | 8.136846997 | 8.48546664  | 8.861243727  | 7.94010157  | 8.404827585  | 8.536564285 | 8.486773515 | 8.331238126 | 8.623098812 | 8.831300702 | 8.648526694 | 8.648526694 |
| GART       | 8.779768302 | 9.06486587  | 8.486980989 | 8.15411535  | 9.41517977  | 7.925588257 | 8.10866493  | 8.32754235  | 8.484997891  | 8.442511126 | 8.65473462   | 7.78112236  | 7.611091953 | 8.139154274 | 8.478507015 | 8.497978651 | 8.706894206 | 8.503758494 |
| LDNR1F     | 8.456606082 | 8.758971356 | 8.613469394 | 8.613469394 | 7.255301727 | 8.30793188  | 8.470168217 | 8.30575136  | 8.4818790162 | 7.93001196  | 8.277784812  | 8.886155689 | 8.645087442 |             |             |             |             |             |



|             |             |             |              |             |             |             |             |             |             |             |             |             |             |              |             |             |             |             |
|-------------|-------------|-------------|--------------|-------------|-------------|-------------|-------------|-------------|-------------|-------------|-------------|-------------|-------------|--------------|-------------|-------------|-------------|-------------|
| SLCA42      | 8.87754626  | 7.27000813  | 8.917668252  | 7.47546854  | 7.82612726  | 8.74981528  | 8.460660564 | 9.07380257  | 8.42824895  | 8.50998969  | 8.57635083  | 8.046122494 | 8.128380299 | 7.739207525  | 8.60154796  | 8.180778859 | 8.66471735  | 8.32674748  |
| XRCC4       | 8.854027813 | 8.9852182   | 8.827210462  | 8.80452003  | 8.938235969 | 8.645585771 | 7.96642192  | 8.11049733  | 8.646129366 | 8.098682562 | 8.598584413 | 8.773962159 | 8.541530339 | 7.604935707  | 7.984164971 | 8.163644164 | 8.072556305 | 8.342642357 |
| FAM193B     | 8.313956033 | 8.651248674 |              | 8.449516537 | 8.677912752 | 7.260108488 | 9.014279336 | 6.658920324 | 8.216138624 | 8.436822668 | 8.482219934 | 8.42657675  | 8.286790387 | 8.796249801  | 8.785273129 | 8.310934264 | 8.880589413 | 8.829272139 |
| TMEM126B    | 8.66036537  | 8.577006145 | 8.43290977   | 8.636261824 | 9.180482575 | 8.475183224 | 8.279863866 | 8.099898464 | 8.768552432 | 8.293427637 | 8.310356873 | 8.656818055 | 8.746176486 | 8.367035208  | 8.101796148 | 8.452599531 | 8.612634917 | 8.384065968 |
| TOP2A       | 8.47065237  | 8.46449876  | 8.321451493  | 8.421451493 | 8.421451493 | 8.421451493 | 8.421451493 | 8.421451493 | 8.421451493 | 8.421451493 | 8.421451493 | 8.421451493 | 8.421451493 | 8.421451493  | 8.421451493 | 8.421451493 | 8.421451493 | 8.421451493 |
| SERTAD1     | 8.325124406 | 8.2948857   | 8.309817607  | 8.309817607 | 8.309817607 | 8.309817607 | 8.309817607 | 8.309817607 | 8.309817607 | 8.309817607 | 8.309817607 | 8.309817607 | 8.309817607 | 8.309817607  | 8.309817607 | 8.309817607 | 8.309817607 | 8.309817607 |
| ANKK1       | 8.71435047  | 7.748372006 | 8.618060029  | 8.311557788 | 8.572316518 | 8.466194854 | 8.366782479 | 5.78618494  | 8.433308363 | 6.698437933 | 8.20268755  | 8.175198913 | 7.721807581 | 7.942059435  | 6.718033221 | 8.183704106 | 8.643290616 | 8.051066467 |
| FAM155A     | 8.800927858 | 8.965214164 | 8.790698632  | 8.965214164 | 8.790698632 | 8.965214164 | 8.790698632 | 8.965214164 | 8.790698632 | 8.965214164 | 8.790698632 | 8.965214164 | 8.790698632 | 8.965214164  | 8.790698632 | 8.965214164 | 8.790698632 | 8.965214164 |
| SIPALL1     | 8.547156824 | 8.128361972 | 6.984056705  | 8.517807659 | 7.75778764  | 8.070389556 | 9.05876903  | 8.158879273 | 8.32505402  | 8.825538822 | 8.47077884  | 8.444652218 | 8.890732375 | 7.487407372  | 8.480050986 | 8.438991852 | 8.519072428 | 8.591740672 |
| TKFC        | 8.372075295 | 8.386035857 | 8.098898203  | 8.372075295 | 8.386035857 | 8.098898203 | 8.372075295 | 8.386035857 | 8.098898203 | 8.372075295 | 8.386035857 | 8.098898203 | 8.372075295 | 8.386035857  | 8.098898203 | 8.372075295 | 8.386035857 | 8.098898203 |
| TTM131      | 8.732064575 | 8.47064876  | 8.32072392   | 8.47064876  | 8.32072392  | 8.47064876  | 8.32072392  | 8.47064876  | 8.32072392  | 8.47064876  | 8.32072392  | 8.47064876  | 8.32072392  | 8.47064876   | 8.32072392  | 8.47064876  | 8.32072392  | 8.47064876  |
| PF15KA      | 8.87625527  | 7.953106559 | 8.227901408  | 8.454070684 | 8.621223932 | 8.236261247 | 8.177484804 | 8.621081302 | 8.300823435 | 8.544003027 | 8.38049378  | 8.58592694  | 9.194701844 | 7.329589098  | 8.87683725  | 8.707280797 | 8.478520064 | 8.87149882  |
| WRN121      | 8.87223097  | 8.27378903  | 8.735631133  | 8.76356844  | 9.295972301 | 8.46381315  | 8.10309892  | 8.137921038 | 8.41727444  | 8.73147723  | 8.714441923 | 8.57465221  | 8.31959132  | 8.739468949  | 8.12002994  | 8.215681087 |             |             |
| CF1         | 8.02926414  | 7.901755911 | 8.46079464   | 8.29992432  | 8.583558515 | 8.239258406 | 8.51940867  | 8.564485518 | 7.89178756  | 8.450970618 | 8.242295887 | 8.677108769 | 8.073558905 | 8.324715407  | 8.541329325 | 8.382021758 | 8.499890342 | 8.602385142 |
| MFT2        | 8.996319963 | 8.800804872 | 8.600804872  | 8.79512274  | 8.797528948 | 8.284277202 | 8.87715563  | 8.39288015  | 8.48747479  | 8.687794252 | 6.636775924 | 8.153181487 | 8.01539189  | 8.045472215  | 8.211160816 | 8.422811264 |             |             |
| MUS81       | 8.642142463 | 8.034340716 | 8.905508738  | 8.341468288 | 8.35132173  | 7.901665612 | 8.514359717 | 8.536976615 | 8.364737713 | 8.638662361 | 8.194590873 | 8.339175382 | 8.648558975 | 8.80906021   | 8.737025589 | 8.289733717 | 8.600469317 | 8.347149748 |
| LTV1        | 8.52697497  | 8.779673544 | 8.908417885  | 8.035825953 | 8.429326665 | 9.723499937 | 8.604828019 | 8.409614492 | 8.08964492  | 8.08964492  | 8.150173481 | 8.300220362 | 9.430497691 | 8.2722721535 | 8.446266859 | 8.251002992 | 8.103363678 | 8.581692452 |
| ZNF32       | 8.891412929 | 8.519209756 | 8.295697038  | 8.467181231 | 8.407830385 | 8.960793716 | 7.976273112 | 8.615182215 | 8.039823281 | 8.494050661 | 8.545871679 | 9.06070389  | 8.11083636  | 7.887949428  | 8.179029491 | 8.152869112 | 7.736122262 |             |
| CAMK2C      | 8.59691592  | 7.622132334 | 7.74725858   | 7.887947782 | 8.032099687 | 8.3748969   | 8.416232816 | 8.671906887 | 8.213466483 | 8.256575759 | 8.543410538 | 8.976016457 | 8.717937349 | 7.407910831  | 8.611982287 | 8.451814639 | 8.494428242 | 8.308111111 |
| ZBTB17      | 8.571165549 | 8.62600801  | 8.62600801   | 8.571165549 | 8.62600801  | 8.571165549 | 8.62600801  | 8.571165549 | 8.62600801  | 8.571165549 | 8.62600801  | 8.571165549 | 8.62600801  | 8.571165549  | 8.62600801  | 8.571165549 | 8.62600801  | 8.571165549 |
| VCPK1       | 7.532923272 | 8.426923272 |              | 8.627851126 | 8.48017957  | 8.635686516 | 8.487143711 | 8.208913755 | 8.188888452 | 8.445937449 | 8.483589004 | 8.782959809 | 7.146514546 | 8.279642379  | 8.184611598 | 9.144285535 | 8.351536668 | 8.356516183 |
| COYL        | 8.774811954 | 7.766838616 | 8.29594474   | 8.774811954 | 7.766838616 | 8.29594474  | 8.774811954 | 7.766838616 | 8.29594474  | 8.774811954 | 7.766838616 | 8.29594474  | 8.774811954 | 7.766838616  | 8.29594474  | 8.774811954 | 7.766838616 | 8.29594474  |
| BAG4        | 8.111068014 | 8.67568403  | 8.282782957  | 7.488986617 | 8.185886966 | 8.013874606 | 8.141183669 | 8.99709132  | 8.622299026 | 8.223150165 | 8.417928339 | 8.853727684 | 7.536343708 | 8.170611118  | 8.660697186 | 9.045754461 | 8.544644016 | 9.4168671   |
| PLEKH7A     | 8.077310564 | 8.669491256 | 8.077336138  | 8.669491256 | 8.077336138 | 8.669491256 | 8.077336138 | 8.669491256 | 8.077336138 | 8.669491256 | 8.077336138 | 8.669491256 | 8.077336138 | 8.669491256  | 8.077336138 | 8.669491256 | 8.077336138 | 8.669491256 |
| MED13       | 7.759706554 | 7.150646791 | 6.644832114  | 7.610549734 | 8.047407934 | 8.265597133 | 8.256819322 | 8.739101404 | 8.721582629 | 8.58803524  | 8.682890378 | 8.680938363 | 7.777894917 | 8.573043105  | 8.094663719 | 8.316576186 | 8.83811065  | 8.589382037 |
| PPP1R2      | 8.626400947 | 8.496476785 | 8.392877586  | 8.311519491 | 9.268366597 | 8.139628158 | 8.598827121 | 8.76786118  | 8.588079746 | 8.159755538 | 8.544844415 | 8.033743144 | 7.65276464  | 8.054520397  | 8.202855894 | 8.390713035 | 7.983792512 |             |
| RASSF7      | 8.294065445 | 8.193498349 | 8.46644232   | 8.61484221  | 8.403041063 | 8.516779469 | 9.465338991 | 8.126667975 | 8.196216491 | 8.18577465  | 8.67297266  | 8.763188143 | 8.31584286  | 9.122114499  | 8.917057306 | 8.038652554 | 8.218431375 | 8.33288883  |
| NDK1        | 8.942075007 | 7.295192793 | 8.125189061  | 8.295192793 | 8.125189061 | 8.295192793 | 8.125189061 | 8.295192793 | 8.125189061 | 8.295192793 | 8.125189061 | 8.295192793 | 8.125189061 | 8.295192793  | 8.125189061 | 8.295192793 | 8.125189061 | 8.295192793 |
| ClSorF3B-AP | 8.942075007 | 8.942075007 | 8.942075007  | 8.942075007 | 8.942075007 | 8.942075007 | 8.942075007 | 8.942075007 | 8.942075007 | 8.942075007 | 8.942075007 | 8.942075007 | 8.942075007 | 8.942075007  | 8.942075007 | 8.942075007 | 8.942075007 | 8.942075007 |
| IFIT2       | 8.095705011 | 8.409629044 | 8.495258331  | 9.006303101 | 8.16716395  | 8.6808633   | 8.345085266 | 6.647668976 | 8.341605449 | 8.241399849 | 8.727743697 | 8.907933094 | 7.125275249 | 8.789888844  | 8.55605182  | 8.085933528 | 8.459188297 | 8.470890562 |
| NFZ         | 7.906284522 | 6.783977068 | 8.270984876  | 8.270984876 | 8.03616699  | 8.193524859 | 8.999823721 | 8.530062641 | 8.966893895 | 7.947830983 | 8.966830077 | 8.51908977  | 8.799000043 | 8.553149333  | 9.054839112 | 8.336966432 | 8.791681816 |             |
| NTF2        | 8.781668735 | 8.81203274  | 8.597504403  | 8.28282847  | 8.024605669 | 8.508887691 | 8.329815299 | 8.442372816 | 8.72794591  | 8.603655287 | 8.314242374 | 8.215160965 | 8.707858463 | 8.262793377  | 7.826178887 | 8.851633369 | 8.394279168 | 8.420168152 |
| PDGK1       | 8.598512158 | 8.749618401 | 8.749618401  | 8.598512158 | 8.749618401 | 8.749618401 | 8.598512158 | 8.749618401 | 8.598512158 | 8.749618401 | 8.598512158 | 8.749618401 | 8.598512158 | 8.749618401  | 8.598512158 | 8.749618401 | 8.598512158 | 8.749618401 |
| ZBTB2       | 7.598989824 | 7.337689828 | 9.184650148  | 8.317888724 | 9.275204719 | 9.191906007 | 8.344462787 | 8.28223094  | 9.141991069 | 8.540754645 | 8.648952875 | 8.377668872 | 6.215657144 | 8.940680797  | 8.374127444 | 8.858550336 | 7.337089194 | 8.485343352 |
| NDK2        | 8.409487951 | 8.35633494  | 8.230609052  | 8.230609052 | 8.230609052 | 8.230609052 | 8.230609052 | 8.230609052 | 8.230609052 | 8.230609052 | 8.230609052 | 8.230609052 | 8.230609052 | 8.230609052  | 8.230609052 | 8.230609052 | 8.230609052 | 8.230609052 |
| ZDHX3C      | 8.529757079 | 8.529757079 | 8.529757079  | 8.529757079 | 8.529757079 | 8.529757079 | 8.529757079 | 8.529757079 | 8.529757079 | 8.529757079 | 8.529757079 | 8.529757079 | 8.529757079 | 8.529757079  | 8.529757079 | 8.529757079 | 8.529757079 | 8.529757079 |
| MITO1       | 7.718570213 | 8.300671887 | 8.56716148   | 8.19141863  | 8.867119966 | 8.349041643 | 8.418412627 | 8.425215151 | 8.063779497 | 8.278216599 | 7.886323529 | 9.033365054 | 8.596857766 | 7.85907735   | 8.105295944 | 8.261061115 | 8.51465091  | 8.378705770 |
| DKAP3       | 8.194640318 | 8.233769739 | 8.618550976  | 8.356399482 | 8.894530786 | 8.612866614 | 8.458097023 | 8.282555322 | 8.401419056 | 8.282555322 | 8.401419056 | 8.282555322 | 8.401419056 | 8.282555322  | 8.401419056 | 8.282555322 | 8.401419056 | 8.282555322 |
| MEF1        | 7.330076532 | 7.112818758 | 8.916498788  | 8.18286592  | 8.481428167 | 7.258479379 | 8.557663911 | 8.600898501 | 8.325374026 | 8.44540734  | 8.439414635 | 8.420191872 | 8.091170964 | 8.237733991  | 8.631547653 | 8.799288935 | 8.236159953 | 7.97390501  |
| ACTO13      | 8.417816548 | 8.125811027 | 7.854743129  | 7.980434882 | 8.869393705 | 8.224827816 | 8.414648089 | 8.869839705 | 8.224827816 | 8.414648089 | 8.869839705 | 8.224827816 | 8.414648089 | 8.869839705  | 8.224827816 | 8.414648089 | 8.869839705 | 8.224827816 |
| RUVBL1      | 8.798844013 | 8.794100755 | 8.9751122054 | 9.655764119 | 7.429007586 | 8.334404015 | 8.332178038 | 8.364998625 | 8.473937773 | 8.388281752 | 7.625975561 | 8.812644061 | 9.415594485 | 8.384530332  | 8.295400066 | 8.194519858 | 8.382076608 |             |
| TMEM161A    | 8.819534187 | 8.54968197  | 8.383304073  | 8.028842703 | 8.473901079 | 8.799743269 | 8.303399607 | 8.785185825 | 8.067309968 | 8.230664993 | 8.039510543 | 8.691362962 | 8.530029845 | 8.718540776  |             |             |             |             |

|          |             |             |             |             |              |             |             |             |             |             |             |             |             |             |             |             |             |             |
|----------|-------------|-------------|-------------|-------------|--------------|-------------|-------------|-------------|-------------|-------------|-------------|-------------|-------------|-------------|-------------|-------------|-------------|-------------|
| THAP6    | 8.417773567 | 8.325730835 | 9.059417812 | 8.566617779 | 8.402878429  | 8.845397711 | 8.137413533 | 8.610607926 | 8.082644375 | 8.53029032  | 7.980527703 | 7.915947741 | 8.943266307 | 8.914272314 | 8.223151105 | 8.406852629 | 8.269959166 | 8.303767301 |
| XPO6     | 8.540451261 | 8.138243396 | 8.366941877 | 8.561752075 | 8.246768768  | 8.034591296 | 8.231105567 | 8.559820315 | 8.017381312 | 8.579796045 | 8.140445855 | 8.442663388 | 8.869305105 | 8.057173341 | 8.802300713 | 8.304401425 | 8.875577723 | 8.262037511 |
| SGPP1    | 8.752540329 | 8.025340729 | 8.591646568 | 8.924042605 | 8.257773400  | 8.723846571 | 8.849264785 | 8.865351372 | 8.589395477 | 8.092866818 | 8.332534589 | 8.287059691 | 8.097206923 | 8.821661851 | 8.905121932 | 8.091852695 | 8.735279942 |             |
| ORR2     | 8.163355584 | 8.740996889 | 8.466658889 | 8.761533628 | 8.925468337  | 9.574000809 | 9.028072177 | 8.135695471 | 8.643063599 | 8.340564383 | 8.938536888 | 8.644268878 | 9.033445553 | 8.305313992 | 8.310339257 | 8.893134226 | 8.115649901 | 7.848060179 |
| RFI23    | 8.980665935 | 8.375949859 | 8.385789829 | 8.130440858 | 8.585796829  | 8.175033202 | 8.553787411 | 8.440265989 | 8.440265989 | 8.430042399 | 8.726372235 | 8.442043112 | 8.077804834 | 7.608255998 | 8.071964951 | 8.612403691 | 8.612403691 | 8.374425238 |
| FAM193A  | 8.752634014 | 8.283767487 | 8.613878005 | 8.841376491 | 8.851054331  | 8.50667032  | 8.508444448 | 8.00508642  | 8.330270047 | 8.438005651 | 8.295915175 | 8.573565594 | 8.812504551 | 8.626787001 | 8.160282140 | 8.544747827 | 8.929296655 | 7.971794471 |
| QDF2     | 8.730890903 | 8.871739008 | 8.622588834 | 7.628119372 | 7.831739251  | 7.760517967 | 6.777907064 | 8.564135926 | 8.737663565 | 8.605411975 | 8.443177109 | 9.576744118 | 8.11044289  | 8.041293134 | 8.016806017 | 8.194155738 | 8.229442132 | 8.402900417 |
| CFVP1    | 8.076623458 | 8.181139112 | 8.643321553 | 6.196463903 | 6.732332451  | 6.24275065  | 6.65599259  | 8.005413114 | 8.005413114 | 8.005413114 | 8.248403063 | 8.577253385 | 8.85343067  | 7.834212444 | 8.726293987 | 8.24265014  | 8.744282106 | 8.552520029 |
| PKD1     | 8.951854985 | 8.328093533 | 8.306098277 | 8.691446029 | 7.444545669  | 7.376117829 | 8.84480185  | 8.275017235 | 7.95196386  | 8.61890792  | 8.134584957 | 9.936415203 | 6.79541531  | 8.872295549 | 8.404157387 | 8.399338294 | 8.789147444 | 8.429518734 |
| CS19A3   | 8.831121057 | 8.179363358 | 8.179363358 | 8.000124005 | 8.814285128  | 8.053139531 | 8.29315799  | 8.54496369  | 8.387261546 | 9.092432155 | 8.359978761 | 7.053250006 | 8.006108293 | 8.134130748 | 8.134130748 | 8.134130748 | 8.134130748 | 8.251188806 |
| RNASE4   | 8.807554474 | 8.46688714  | 8.60688714  | 8.436880874 | 8.512416287  | 8.39030653  | 8.421278712 | 8.760348846 | 8.707823387 | 7.873926529 | 8.55186278  | 7.83920025  | 5.974158884 | 8.92290603  | 8.151561907 | 8.01426206  | 7.919413736 | 8.125677633 |
| ZNF51    | 9.286365174 | 8.106899471 | 8.721418542 | 9.165574422 | 8.60839629   | 8.91828679  | 8.417438723 | 7.952748656 | 8.784527509 | 9.05106672  | 8.649565945 | 7.999073176 | 7.88268335  | 8.831550913 | 8.675692551 | 8.442859214 | 7.732797131 | 8.586153347 |
| CD14B    | 8.41106418  | 8.430497376 | 8.788233712 | 8.418549926 | 8.17640046   | 8.649455436 | 8.282021996 | 8.341288575 | 8.744409049 | 7.83631609  | 8.83506697  | 7.389392365 | 8.267308582 | 8.727930474 | 8.139476393 | 8.139476393 | 8.139476393 | 8.139476393 |
| SLN2     | 8.128008229 | 8.03695301  | 8.102317874 | 7.684159889 | 8.547350751  | 6.854399336 | 8.342676748 | 8.971891739 | 8.09044289  | 9.053414064 | 8.352116139 | 8.44391697  | 7.12981927  | 8.596110023 | 8.082739868 | 8.806732977 | 8.91357133  | 9.168185565 |
| CIGT     | 8.196203768 | 8.086856221 | 9.088688587 | 8.59365384  | 8.342039857  | 8.595988483 | 8.130171918 | 8.600569624 | 8.130171918 | 8.600569624 | 8.52878062  | 8.102304077 | 7.519129526 | 7.914209068 | 7.76126966  | 8.251534522 | 8.31861095  | 8.84415568  |
| TT13     | 8.698995751 | 8.635816552 | 8.843957184 | 8.475502555 | 8.937225886  | 7.997201106 | 8.636791037 | 7.944649077 | 7.87540227  | 8.042462177 | 8.193968561 | 8.08049031  | 8.824326532 | 8.17526653  | 8.152686134 | 8.522726371 | 8.160692053 | 8.06399666  |
| GRP180   | 8.604136708 | 8.576800449 | 7.390923811 | 8.604705111 | 7.461630056  | 6.687698939 | 8.390140185 | 8.242184455 | 8.324745575 | 8.324745575 | 8.35116182  | 8.61296337  | 8.58219205  | 9.52854219  | 8.68735737  | 8.387524423 | 8.385029888 | 8.578082933 |
| FAM213A  | 8.024427003 | 8.61786167  | 8.356532088 | 8.45369829  | 8.083717442  | 8.3768835   | 7.860426714 | 8.670470753 | 8.00887117  | 8.58323804  | 8.25908392  | 8.567924265 | 8.217169194 | 8.006704896 | 8.41759813  | 8.90179682  | 8.332916334 |             |
| IREB2    | 7.26068418  | 8.446991816 | 8.565838219 | 8.284946492 | 8.975529987  | 7.612126742 | 8.351827086 | 8.96856997  | 8.048560728 | 8.089318825 | 8.67935875  | 7.72356022  | 8.503751718 | 8.10930653  | 8.050075491 | 8.23995409  | 8.865931984 | 8.561085278 |
| INT12    | 8.340267353 | 9.351477711 | 8.930025986 | 8.529550225 | 8.739517662  | 8.739517662 | 8.739517662 | 8.739517662 | 8.211713671 | 8.2092384   | 8.0956113   | 9.540853044 | 8.409592007 | 8.67666531  | 7.925365199 | 8.860697361 | 8.362652449 | 8.931211277 |
| FAM102A  | 8.416247683 | 7.905095669 | 7.962303522 | 8.529110127 | 8.17384942   | 8.030727484 | 8.97259422  | 8.822843466 | 8.198879903 | 8.239274549 | 7.75526854  | 7.46304164  | 8.137349044 | 8.137349044 | 8.137349044 | 8.137349044 | 8.137349044 | 8.137349044 |
| TRIM38   | 8.146604389 | 8.80013975  | 6.565027694 | 8.284213872 | 7.91635204   | 8.518091402 | 8.251027831 | 8.251027831 | 8.400519477 | 8.400519477 | 8.239077324 | 8.348857401 | 8.282909005 | 8.83067081  | 8.226032889 | 8.527245276 | 8.648368041 | 8.063239555 |
| THP2     | 8.987009477 | 8.80022321  | 8.18355196  | 8.399292054 | 8.391255294  | 8.465990494 | 8.808028008 | 8.194748386 | 8.160385186 | 8.123760129 | 8.526560659 | 8.419538413 | 8.816539825 | 8.08018151  | 7.995951379 | 7.916312971 | 7.84835546  | 8.55324587  |
| ZDHC2    | 8.398751837 | 8.197253774 | 8.34792476  | 8.501917329 | 8.75873007   | 7.907391667 | 8.290641265 | 8.424237632 | 9.025827243 | 8.126705763 | 8.73802598  | 8.501787862 | 8.77648006  | 8.097191865 | 8.367130806 | 8.453390138 | 8.527428446 |             |
| SCFD2    | 8.40766585  | 8.9723509   | 8.51681445  | 8.45552483  | 8.8081930719 | 8.094436916 | 8.298744178 | 8.620882369 | 8.177142154 | 8.177142154 | 8.321581154 | 8.387130455 | 8.344956911 | 8.803062658 | 8.089543531 | 8.44910849  | 8.403158341 | 7.868465615 |
| RGH2     | 8.219239185 | 8.705191181 | 8.780693633 | 8.728864447 | 7.967465028  | 9.140413882 | 7.967465028 | 9.257887912 | 8.267575812 | 8.162033954 | 8.37891806  | 8.415307837 | 8.903801812 | 6.906144972 | 7.919343138 | 8.602975758 | 8.59879697  | 8.469840024 |
| CLIC2    | 8.960861399 | 8.44983826  | 9.37348626  | 8.522209626 | 7.445732483  | 8.721801462 | 7.727598958 | 8.15109842  | 8.567805952 | 7.435257457 | 8.105249428 | 8.060374228 | 8.41444419  | 8.637400462 | 8.36945012  | 8.374587091 | 7.864343367 | 8.037975185 |
| WVORC11  | 7.90313024  | 8.545632555 | 8.545632555 | 8.545632555 | 8.545632555  | 8.545632555 | 8.545632555 | 8.545632555 | 8.545632555 | 8.545632555 | 8.545632555 | 8.545632555 | 8.545632555 | 8.545632555 | 8.545632555 | 8.545632555 | 8.545632555 | 8.545632555 |
| OTUD4    | 7.378540925 | 8.143291219 | 8.477184719 | 8.65475883  | 8.214583696  | 6.856832612 | 8.195210982 | 9.135275743 | 8.308643427 | 8.945707061 | 8.72415654  | 7.76126275  | 8.976219877 | 6.845435643 | 8.965712913 | 8.700353487 | 9.070728984 | 8.082902188 |
| MGAT3    | 9.48844292  | 8.587078736 | 8.587078736 | 8.587078736 | 8.587078736  | 8.587078736 | 8.587078736 | 8.587078736 | 8.587078736 | 8.587078736 | 8.587078736 | 8.587078736 | 8.587078736 | 8.587078736 | 8.587078736 | 8.587078736 | 8.587078736 | 8.587078736 |
| UVSSA    | 8.519008492 | 8.362453044 | 7.410772795 | 8.326434351 | 8.439921832  | 8.16977245  | 8.5378701   | 8.607479397 | 8.088013078 | 8.281952004 | 8.57519675  | 7.728920821 | 6.119764024 | 8.054901409 | 8.867956662 | 8.55952472  | 8.42017061  | 8.341373155 |
| FBXL20   | 7.62803799  | 9.25635785  | 9.945912965 | 8.747820964 | 8.388557162  | 8.408395416 | 8.117286974 | 8.487897014 | 8.00730067  | 8.606305511 | 9.137755629 | 8.326228966 | 8.849079466 | 8.308512456 | 8.38943395  | 8.787196216 |             |             |
| ID3      | 8.944593269 | 8.243858727 | 9.002115733 | 9.24668372  | 8.063034959  | 8.288496837 | 8.899532244 | 8.574229947 | 8.135419555 | 8.194295108 | 8.543479852 | 7.51387912  | 8.490482967 | 8.445230347 | 8.336843569 | 7.239368367 | 7.861701599 | 9.27737332  |
| RAS16    | 8.400273854 | 9.72557422  | 8.98606552  | 8.675274296 | 8.789809314  | 9.122828247 | 9.45122678  | 8.59916612  | 8.160680717 | 8.160680717 | 7.71948825  | 7.923490304 | 6.325897296 | 8.810720219 | 9.137334449 | 8.32202515  | 8.76151055  | 8.374828248 |
| RABO6    | 8.52088442  | 8.505211216 | 8.401674934 | 8.025745932 | 8.52535566   | 7.887680587 | 7.887680587 | 7.887680587 | 7.887680587 | 7.887680587 | 8.129807616 | 8.51144483  | 8.67924369  | 8.17074521  | 8.476208206 | 8.468492033 | 8.133744274 | 8.814744714 |
| CDKSRAP2 | 8.67727331  | 7.832323525 | 8.102221484 | 7.26529042  | 8.702235446  | 8.281890018 | 9.056833731 | 8.70057402  | 8.234037421 | 8.490796232 | 8.139631648 | 8.647800064 | 8.275406312 | 9.0089685   | 8.7515342   | 8.102744835 | 7.93460041  | 7.695856634 |
| TERF2    | 8.496487831 | 8.92076374  | 7.66668833  | 8.09408966  | 10.14960496  | 7.751207383 | 7.615316232 | 6.474934052 | 8.692053841 | 8.600027259 | 8.34835101  | 8.348351007 | 8.03836884  | 8.440927953 | 6.519054688 | 8.849115702 | 8.431245349 | 8.468982251 |
| CFo2f4   | 8.369750328 | 9.238832657 | 9.077035746 | 8.959822552 | 8.507295085  | 8.321439755 | 7.799596408 | 8.21300004  | 8.608923983 | 8.790361129 | 7.31297263  | 8.338748794 | 8.292783382 | 8.40061675  | 7.787196216 |             |             |             |
| TMEM64   | 8.15699542  | 8.779374689 | 8.615607133 | 8.47559086  | 8.292760048  | 8.57814655  | 8.734866014 | 8.640284347 | 8.860897012 | 8.513183694 | 8.38745666  | 7.060347903 | 8.388198224 | 7.947074025 | 8.284540401 | 8.344238998 | 8.05932227  | 8.008903684 |
| CEP128   | 7.854194511 | 5.743400371 | 8.525119584 | 7.842928733 | 8.947287059  | 7.701694455 | 8.890147    | 8.101589364 | 8.384668781 | 8.101589364 | 8.384668781 | 8.409650705 | 8.25374718  | 9.519064129 | 8.777434394 | 8.781726997 | 8.059205007 | 8.041038663 |
| RAV1     | 8.46647138  | 8.46647138  | 8.46647138  | 8.46647138  | 8.46647138   | 8.46647138  | 8.46647138  | 8.46647138  | 8.46647138  | 8.46647138  | 8.46647138  | 8.46647138  | 8.46647138  | 8.46647138  | 8.46647138  | 8.46647138  | 8.46647138  | 8.46647138  |
| MCC11    | 8.505473937 | 8.767164319 | 8.004646902 | 8.146972668 | 8.8489941    | 8.775689027 | 8.87825687  | 7.91545448  | 8.397261624 | 8.402970174 | 8.402970174 | 7.904326558 | 6.02593647  | 8.024218432 | 8.403749167 | 8.1         |             |             |

|         |              |             |             |             |             |              |             |              |             |              |             |              |             |              |             |              |             |              |
|---------|--------------|-------------|-------------|-------------|-------------|--------------|-------------|--------------|-------------|--------------|-------------|--------------|-------------|--------------|-------------|--------------|-------------|--------------|
| SPKX2   | 7.971702413  | 8.71811202  | 8.584169874 | 8.912131803 | 8.673360094 | 8.360214194  | 7.857170925 | 8.443400131  | 7.697131122 | 8.658957056  | 8.376397488 | 8.617399052  | 7.764130513 | 8.157587519  | 8.267425309 | 7.585721208  | 8.123322083 | 8.37637788   |
| ACTR8   | 8.1571004172 | 8.110301826 | 7.130748212 | 7.146622311 | 7.121740242 | 8.417235462  | 8.861040005 | 8.386456677  | 8.698668986 | 8.184205247  | 8.877594036 | 8.184337534  | 8.849185886 | 8.04510439   | 8.756228442 | 8.872946715  | 8.32521232  | 8.383995722  |
| PKR32   | 8.193657359  | 7.209191525 | 8.632500214 | 7.888797288 | 8.462137024 | 8.964588698  | 8.506884539 | 8.045746706  | 8.248540744 | 8.294218328  | 8.405463789 | 8.344208663  | 8.492221254 | 8.122402872  | 8.391911744 | 7.955060826  | 8.061276022 | 8.249199948  |
| MKNX1   | 8.14959316   | 8.334360006 | 8.808253988 | 8.709389379 | 8.160059687 | 7.9573446    | 8.566115839 | 8.512417031  | 8.320776098 | 8.403137323  | 8.153626265 | 7.885443473  | 6.648117194 | 8.600776343  | 8.409272965 | 8.406560161  | 8.328546878 | 8.175164272  |
| MFN2    | 8.15449839   | 8.175285131 | 7.995615532 | 8.437022406 | 8.481809463 | 8.481809463  | 8.481809463 | 8.084756026  | 8.302235118 | 8.478540276  | 8.478540276 | 8.478540276  | 8.478540276 | 8.478540276  | 8.478540276 | 8.478540276  | 8.478540276 | 8.478540276  |
| METL1   | 8.712880089  | 8.28059529  | 8.68802482  | 8.20929529  | 8.153055129 | 8.367131189  | 8.48064882  | 8.389478581  | 8.950304882 | 8.253785378  | 8.266642823 | 8.786848052  | 8.234475822 | 8.620326242  | 8.364731112 | 8.687926257  | 8.37149422  | 8.678926257  |
| MRA7    | 8.389588623  | 9.5089985   | 8.341082665 | 8.210295406 | 8.11309288  | 8.960284105  | 8.957002865 | 8.298634325  | 8.910264462 | 7.790372859  | 8.545395795 | 7.981070191  | 8.60323262  | 8.705111231  | 7.487191899 | 8.097498512  | 7.900429796 | 7.835346769  |
| RAB43   | 8.448939648  | 8.230857034 | 8.541138101 | 8.02634795  | 8.6726922   | 8.091516352  | 8.291810225 | 8.335954778  | 8.251047842 | 8.578068442  | 8.399936619 | 8.607279968  | 8.21332445  | 8.354256377  | 8.241777012 | 8.004151028  | 8.063073948 | 8.055809351  |
| ATP6V1H | 8.486604420  | 7.606148407 | 8.02493772  | 8.580642887 | 8.540548187 | 8.492597771  | 8.870600871 | 8.04674715   | 8.53761705  | 8.058189768  | 8.199525987 | 8.219055871  | 8.970813341 | 8.836291275  | 8.239664229 | 8.230112317  | 8.037076653 | 8.174313923  |
| RWD2A   | 8.95594477   | 8.266511493 | 8.210922192 | 8.938893201 | 8.075811192 | 8.336964882  | 8.692718744 | 8.388371437  | 8.699721874 | 8.08697287   | 8.110987431 | 8.210103425  | 8.035105813 | 8.226716931  | 8.630513285 | 8.496047688  | 8.105549311 | 8.175431923  |
| TK2     | 8.280420834  | 8.839955501 | 8.673533482 | 8.421779952 | 8.335543695 | 8.581177736  | 8.421279952 | 8.015963588  | 8.396426388 | 8.000878252  | 8.566730824 | 8.228468927  | 8.048686127 | 8.038804506  | 8.858026673 | 8.038804506  | 8.858026673 | 7.774250854  |
| ChorF2  | 8.116249369  | 8.082706361 | 7.849197225 | 7.96822242  | 7.576959444 | 7.681513644  | 8.400609575 | 8.787632449  | 8.231626995 | 8.4643650369 | 8.464727699 | 8.004972178  | 8.471442429 | 8.813978354  | 8.882333242 | 8.556325551  | 8.759857118 | 8.622913913  |
| FAM35A  | 8.52493962   | 8.07174101  | 7.769167877 | 8.00472075  | 7.900320041 | 8.22157646   | 8.990458307 | 8.063795754  | 8.273742533 | 7.788355447  | 8.07207948  | 7.107939172  | 8.7814796   | 9.118916045  | 8.448657372 | 9.06724431   | 8.27624431  | 8.27624431   |
| CFD1    | 8.191921179  | 8.343818459 | 8.616257521 | 8.870406984 | 8.370746255 | 7.691871228  | 8.102950126 | 8.202571043  | 8.347614886 | 8.440630333  | 8.350830481 | 8.307451206  | 8.402079672 | 8.903212105  | 8.197426048 | 8.438624421  | 8.072625252 | 8.172687844  |
| CNO73   | 8.717425956  | 8.757548179 | 8.303436586 | 8.296867442 | 8.597222127 | 8.18834158   | 8.15789015  | 8.184495518  | 8.15789015  | 8.224692152  | 8.306179317 | 8.644468023  | 8.79759288  | 8.973861319  | 8.38777922  | 8.364189961  | 8.620352132 | 8.356381713  |
| ASUN    | 8.167079213  | 7.398738352 | 8.11863284  | 8.909084684 | 8.745755588 | 8.164937157  | 8.030474644 | 8.323295906  | 8.52581162  | 8.224692152  | 8.084150931 | 8.222532468  | 8.648176728 | 8.441349351  | 8.248908859 | 8.222532468  | 9.277129424 | 8.354319208  |
| NVL     | 8.20517947   | 8.789657544 | 8.226226249 | 8.10073118  | 8.10073118  | 8.23961462   | 8.648176728 | 8.441349351  | 8.248908859 | 8.222532468  | 8.648176728 | 8.441349351  | 8.248908859 | 8.222532468  | 8.648176728 | 8.441349351  | 8.248908859 | 8.222532468  |
| SULF2   | 9.24518536   | 8.712765046 | 8.486144473 | 8.300251801 | 8.417088444 | 7.984994641  | 8.679054848 | 8.611224036  | 8.961187709 | 8.789299514  | 9.340212749 | 6.505625494  | 8.20167499  | 6.439106525  | 7.778773946 | 8.199938858  | 7.600340169 | 7.889970751  |
| CLDN3   | 8.418959162  | 7.918295665 | 8.073198037 | 10.0884057  | 8.433203919 | 9.298891005  | 9.000963582 | 8.523923249  | 8.642970339 | 8.348888375  | 8.33487863  | 7.101515294  | 7.342759663 | 7.235646915  | 7.752024187 | 7.029144627  | 6.828891456 | 10.08759011  |
| HGSMA   | 7.730558959  | 7.061060381 | 8.463384356 | 8.042694261 | 8.077063216 | 8.93772184   | 8.443272899 | 8.403565022  | 8.403565022 | 8.403565022  | 8.403565022 | 8.403565022  | 8.403565022 | 8.403565022  | 8.403565022 | 8.403565022  | 8.403565022 | 8.403565022  |
| FAM35A  | 8.52493962   | 8.07174101  | 7.769167877 | 8.00472075  | 7.900320041 | 8.22157646   | 8.990458307 | 8.063795754  | 8.273742533 | 7.788355447  | 8.07207948  | 7.107939172  | 8.7814796   | 9.118916045  | 8.448657372 | 9.06724431   | 8.27624431  | 8.27624431   |
| SRF     | 8.68429091   | 7.88442027  | 8.310629953 | 8.704232217 | 7.884301118 | 7.957783085  | 8.290510512 | 8.825019512  | 8.364224011 | 8.174371138  | 8.680184555 | 7.856198962  | 8.570388283 | 8.046484878  | 8.382938047 | 7.962283637  | 8.17211341  | 8.17211341   |
| HK1     | 8.356291877  | 7.759146113 | 8.588314418 | 9.25824442  | 8.007486322 | 7.189009198  | 7.8020927   | 8.39754136   | 8.385983605 | 8.234143639  | 8.649838887 | 7.942262874  | 7.78119564  | 8.484020508  | 8.637667971 | 8.354686821  | 8.33917974  | 8.060137617  |
| CHERP   | 8.138841678  | 8.168494288 | 8.217061961 | 8.064166831 | 8.17061961  | 8.327023714  | 8.202980945 | 8.327023714  | 8.202980945 | 8.327023714  | 8.202980945 | 8.327023714  | 8.202980945 | 8.327023714  | 8.202980945 | 8.327023714  | 8.202980945 | 8.327023714  |
| PSM5A   | 8.086247574  | 7.283279503 | 7.963704974 | 7.963704974 | 7.963704974 | 7.963704974  | 7.963704974 | 7.963704974  | 7.963704974 | 7.963704974  | 7.963704974 | 7.963704974  | 7.963704974 | 7.963704974  | 7.963704974 | 7.963704974  | 7.963704974 | 7.963704974  |
| JDP2    | 8.657545132  | 8.076391181 | 9.003500466 | 7.92762529  | 7.92762529  | 7.92762529   | 7.92762529  | 7.92762529   | 7.92762529  | 7.92762529   | 7.92762529  | 7.92762529   | 7.92762529  | 7.92762529   | 7.92762529  | 7.92762529   | 7.92762529  | 7.92762529   |
| SC5A23  | 8.22966868   | 9.76276529  | 9.464484314 | 7.92577805  | 7.92577805  | 7.92577805   | 7.92577805  | 7.92577805   | 7.92577805  | 7.92577805   | 7.92577805  | 7.92577805   | 7.92577805  | 7.92577805   | 7.92577805  | 7.92577805   | 7.92577805  | 7.92577805   |
| IFW1    | 8.16591441   | 8.25068947  | 8.15839192  | 8.009175224 | 8.10389496  | 7.7137901    | 8.283860674 | 8.40210336   | 8.781038374 | 8.296381826  | 8.902282441 | 8.594614534  | 7.80464002  | 9.288715389  | 8.946468802 | 8.270171389  | 8.291371886 | 8.321035958  |
| SC35E   | 7.532032853  | 8.992805254 | 8.674773082 | 8.073227713 | 8.830578534 | 8.633000745  | 7.395482258 | 8.263092535  | 7.643926492 | 8.41938186   | 7.921528978 | 8.370845386  | 7.519102919 | 8.510463228  | 8.761047638 | 8.07837046   | 8.33422965  | 8.770885227  |
| CDP1    | 8.829727937  | 8.254780587 | 7.738467796 | 8.159906178 | 8.254780587 | 8.254780587  | 8.254780587 | 8.254780587  | 8.254780587 | 8.254780587  | 8.254780587 | 8.254780587  | 8.254780587 | 8.254780587  | 8.254780587 | 8.254780587  | 8.254780587 | 8.254780587  |
| RAB2B   | 7.844826135  | 8.59061493  | 8.046627396 | 7.914616018 | 8.59234786  | 8.023894723  | 8.778442475 | 8.875085217  | 7.86521737  | 8.000778079  | 8.512483422 | 8.191967727  | 8.174478555 | 8.788127418  | 8.910332046 | 7.728890045  | 8.636671611 | 8.21091927   |
| RPUSD1  | 7.844826135  | 8.59061493  | 8.046627396 | 7.914616018 | 8.59234786  | 8.023894723  | 8.778442475 | 8.875085217  | 7.86521737  | 8.000778079  | 8.512483422 | 8.191967727  | 8.174478555 | 8.788127418  | 8.910332046 | 7.728890045  | 8.636671611 | 8.21091927   |
| HP5     | 8.415752003  | 8.846898257 | 7.997221959 | 8.079780131 | 7.973068045 | 8.242978176  | 8.825258318 | 8.268283336  | 7.95146574  | 8.288381918  | 8.660617417 | 7.863166073  | 7.515224889 | 8.782247467  | 8.56597339  | 8.448667635  | 8.484361044 | 8.849519410  |
| IFZL1   | 8.174769859  | 8.120218184 | 8.356769812 | 8.356769812 | 8.356769812 | 8.356769812  | 8.356769812 | 8.356769812  | 8.356769812 | 8.356769812  | 8.356769812 | 8.356769812  | 8.356769812 | 8.356769812  | 8.356769812 | 8.356769812  | 8.356769812 | 8.356769812  |
| INT5    | 9.496646815  | 8.738639533 | 8.226583299 | 8.877131843 | 8.197717655 | 8.321479919  | 8.65930274  | 8.15268989   | 8.770874276 | 8.156160797  | 8.854621643 | 8.687115252  | 7.918599728 | 7.204804665  | 7.730521214 | 8.895299566  | 8.378928621 | 7.988575464  |
| GLRX5   | 8.932493217  | 8.347602322 | 8.549653217 | 8.549653217 | 8.549653217 | 8.549653217  | 8.549653217 | 8.549653217  | 8.549653217 | 8.549653217  | 8.549653217 | 8.549653217  | 8.549653217 | 8.549653217  | 8.549653217 | 8.549653217  | 8.549653217 | 8.549653217  |
| ICE2    | 7.980760642  | 8.972253622 | 8.910244519 | 7.986136537 | 8.034901227 | 7.651432621  | 8.655307166 | 8.316016112  | 8.396346959 | 8.456258428  | 8.38193476  | 8.384785513  | 7.098961068 | 7.794942662  | 8.528678647 | 8.06123595   | 8.17753139  | 8.405104310  |
| PYCARD  | 8.374951862  | 8.17438211  | 8.819279982 | 8.524473179 | 8.515656202 | 8.1263139076 | 8.500831661 | 8.1263139076 | 8.500831661 | 8.1263139076 | 8.500831661 | 8.1263139076 | 8.500831661 | 8.1263139076 | 8.500831661 | 8.1263139076 | 8.500831661 | 8.1263139076 |
| ZDHC14  | 9.249792798  | 9.249792798 | 9.249792798 | 9.249792798 | 9.249792798 | 9.249792798  | 9.249792798 | 9.249792798  | 9.249792798 | 9.249792798  | 9.249792798 | 9.249792798  | 9.249792798 | 9.249792798  | 9.249792798 | 9.249792798  | 9.249792798 | 9.249792798  |
| H4U5A   | 8.139601787  | 8.007867579 | 8.895082519 | 8.260256403 | 8.760391707 | 8.069550845  | 8.599363456 | 8.50142208   | 8.514783844 | 8.905616257  | 8.511075428 | 8.448985374  | 7.981657195 | 7.75906818   | 8.377697697 | 8.412128074  | 8.3581083   | 8.36413528   |
| IFZL1   | 8.174769859  | 8.120218184 | 8.356769812 | 8.356769812 | 8.356769812 | 8.356769812  | 8.356769812 | 8.356769812  | 8.356769812 | 8.356769812  | 8.356769812 | 8.356769812  | 8.356769812 | 8.356769812  | 8.356769812 | 8.356769812  | 8.356769812 | 8.356769812  |
| RAB6    | 8.520718663  | 7.78514701  | 8.669107925 | 8.07176019  | 8.32786041  | 8.67646029   | 8.361213103 | 8.399635688  |             |              |             |              |             |              |             |              |             |              |

|          |             |             |              |              |              |             |             |             |             |             |             |             |             |             |             |             |             |             |
|----------|-------------|-------------|--------------|--------------|--------------|-------------|-------------|-------------|-------------|-------------|-------------|-------------|-------------|-------------|-------------|-------------|-------------|-------------|
| POLIM5   | 7.816380015 | 8.937564358 | 8.525217947  | 8.801928107  | 8.224558238  | 8.822782572 | 8.255041903 | 8.388897713 | 8.230160873 | 8.273086725 | 8.250723298 | 8.677146737 | 7.748655627 | 7.616322188 | 8.475029104 | 7.980984234 | 8.509492692 | 8.881267491 |
| RRP1     | 8.842088352 | 8.904741586 | 8.732128631  | 8.331687028  | 8.427278000  | 8.395243661 | 8.600840592 | 8.282948735 | 8.279525463 | 8.489634753 | 8.406735552 | 8.094266701 | 8.0431626   | 9.331241236 | 8.150359960 | 8.271547446 | 8.12151655  | 8.306918129 |
| SRRD     | 8.246395418 | 8.299865922 | 8.707935194  | 8.598663021  | 8.839612744  | 8.793290191 | 9.005069652 | 8.322629593 | 8.194050065 | 8.32811755  | 8.051536009 | 9.097685009 | 7.721182943 | 8.79749787  | 8.350188156 | 8.480954414 | 8.335892213 | 8.123530403 |
| ESD      | 9.03914795  | 9.054384212 | 8.285370713  | 7.839142864  | 9.124414086  | 8.555607656 | 8.359236502 | 7.943869715 | 8.706407439 | 8.300202953 | 7.869838599 | 8.587114446 | 8.158079896 | 8.061766172 | 7.788312893 | 8.596649562 | 7.947350864 | 8.656105923 |
| WFA      | 8.514505157 | 8.234084529 | 8.230897233  | 8.230897233  | 8.775579648  | 8.571440779 | 8.194735191 | 8.194735191 | 8.214068674 | 8.214068674 | 8.531267449 | 8.198948916 | 8.41627865  | 9.056962917 | 7.72544989  | 8.577510381 | 8.145529374 | 8.212584242 |
| NCL9     | 8.196807335 | 8.693533337 | 7.698452206  | 8.940320206  | 8.630234028  | 8.033240208 | 8.033240208 | 8.168960482 | 8.168960482 | 8.540602025 | 8.1599204   | 8.0579045   | 8.0579045   | 8.0579045   | 8.394072753 | 8.309845104 | 8.547771343 | 7.754520678 |
| TIAM2    | 8.308782376 | 8.15870432  | 8.145663646  | 7.446412438  | 8.344199673  | 8.18484645  | 7.773968637 | 8.803422312 | 8.518313611 | 8.233026622 | 8.203639182 | 8.08820561  | 9.362628734 | 8.759106196 | 9.355288626 | 9.151620644 | 8.711401571 | 8.736886361 |
| RHDM1    | 8.813428525 | 7.107209427 | 8.373909008  | 8.20042501   | 8.425400412  | 8.268884038 | 8.268884038 | 8.616207045 | 8.780843668 | 8.651723255 | 8.298083317 | 8.076370085 | 8.376699579 | 7.293655666 | 8.435054671 | 8.086457643 | 8.652278186 | 8.581127444 |
| SHK      | 8.365608036 | 7.373837526 | 7.932529949  | 7.980969476  | 8.999948727  | 7.974334438 | 8.474376336 | 8.35574824  | 8.50066861  | 8.092777122 | 8.456780035 | 8.378533409 | 7.134380251 | 6.04389966  | 8.267714973 | 8.450957672 | 7.988726447 | 8.439074544 |
| MRPL15   | 8.703263352 | 9.249540682 | 8.730935284  | 7.921290846  | 8.460539861  | 7.982100052 | 7.92829769  | 7.98180052  | 7.998355524 | 8.062827774 | 7.281986199 | 8.179033116 | 8.698848552 | 7.879540011 | 8.086165467 | 8.086165467 | 8.593866304 | 8.593866304 |
| HTA2     | 8.28144728  | 9.305419284 | 8.317811989  | 7.988831426  | 8.543080892  | 8.543080892 | 8.543080892 | 8.220048265 | 8.474128695 | 8.092978535 | 8.424229131 | 7.883198834 | 8.26568108  | 8.93730545  | 7.504179619 | 8.14247357  | 7.913300858 | 9.3026913   |
| COOP5    | 7.999341371 | 8.643022784 | 9.027473416  | 9.396929584  | 8.483661535  | 8.200862262 | 8.062496551 | 8.328797014 | 8.301280511 | 8.106138433 | 8.255306186 | 8.227555813 | 8.313370963 | 8.630390773 | 8.475287863 | 7.987349809 | 8.325640461 | 8.893958994 |
| ADAM17   | 8.125934292 | 8.607516695 | 7.119323565  | 8.212906846  | 8.460539861  | 7.63084587  | 8.427356708 | 8.460539861 | 8.460539861 | 8.597838858 | 8.506846125 | 8.367512401 | 8.041010376 | 8.287076643 | 8.270242861 | 8.663306638 | 8.417010874 | 7.946474151 |
| PKM      | 6.151911231 | 8.543640044 | 8.460380689  | 9.069773018  | 8.748955737  | 8.489292531 | 7.312407065 | 8.181963889 | 8.122684885 | 8.145877284 | 8.253719948 | 9.006794518 | 8.984257826 | 8.400837628 | 8.51336485  | 8.161338651 | 8.068489596 | 7.488033418 |
| JAK2     | 7.395336584 | 8.276661389 | 6.256872008  | 8.557461183  | 8.055227445  | 8.055227445 | 8.055227445 | 8.307662442 | 8.342562442 | 8.752783887 | 8.452039549 | 8.832051757 | 8.87751376  | 8.360498304 | 8.061091317 | 8.246192875 | 8.604358187 | 8.80727028  |
| NDST2    | 8.843754887 | 6.954260786 | 8.770045787  | 7.754595942  | 8.366023573  | 7.383243164 | 8.132297542 | 8.273924111 | 8.384869604 | 8.512849387 | 8.324542927 | 7.55861902  | 8.325432283 | 8.67221911  | 7.87862619  | 8.327312469 | 8.628952263 | 8.628952263 |
| VP33A    | 8.393761589 | 8.594255617 | 7.603629966  | 8.671321072  | 7.75029187   | 8.492272381 | 7.763744751 | 8.382947623 | 8.120576295 | 8.266484529 | 9.312638144 | 8.732632273 | 7.560873146 | 7.693406411 | 8.244842858 | 8.405671723 | 8.986041503 | 8.986041503 |
| DDX51    | 8.107087294 | 7.73872087  | 8.360234628  | 9.061339225  | 8.631573426  | 8.805389554 | 8.226385414 | 8.224989844 | 8.450147806 | 7.784278289 | 8.45823382  | 8.332585233 | 7.929819457 | 8.708614576 | 8.178965235 | 8.29082621  | 8.354079977 | 8.354079977 |
| ASF1A    | 8.345241327 | 8.181460683 | 8.181460683  | 9.054892111  | 8.93655004   | 8.93655004  | 8.93655004  | 8.261481219 | 8.109343444 | 8.211913101 | 8.422991751 | 8.781599856 | 8.825608139 | 8.487117989 | 8.144863991 | 8.289655997 | 8.178680805 | 7.7644115   |
| SMUR2    | 8.375554074 | 8.765303364 | 7.71952229   | 7.81443112   | 8.524698079  | 7.827764339 | 7.910112305 | 8.401846984 | 7.951531698 | 8.373994328 | 8.25825757  | 7.248599584 | 8.517012163 | 8.341037636 | 8.487890754 | 8.30584179  | 8.107041566 | 8.477700165 |
| SPNS1    | 8.676320725 | 8.576320725 | 7.516131317  | 8.007020125  | 7.985531186  | 8.605703849 | 8.304312625 | 8.34457691  | 8.58595756  | 8.296293232 | 8.615826943 | 8.03352036  | 8.855471288 | 8.954807112 | 8.081170237 | 7.932132228 | 8.309786729 | 8.309786729 |
| DNAJC14  | 8.291262714 | 7.862575203 | 8.27668709   | 9.17685857   | 7.277462754  | 8.958900987 | 8.382158325 | 8.958900987 | 8.20323796  | 8.352725879 | 8.399650127 | 8.506233948 | 8.022015323 | 8.24223005  | 8.413267030 | 8.649622888 | 8.468001616 | 8.468001616 |
| MRM2     | 8.491595642 | 8.87714729  | 8.379253754  | 9.63110754   | 7.910585174  | 8.82464365  | 8.61021321  | 7.68888717  | 8.265109214 | 8.134299558 | 7.80345382  | 9.030877627 | 8.741351119 | 9.033717253 | 8.034931919 | 7.953836757 | 7.539771821 | 7.919340581 |
| SUMF1    | 8.04139158  | 8.460260795 | 9.003581569  | 8.484273063  | 8.314031908  | 8.153457758 | 8.54507758  | 8.874061861 | 8.289122586 | 8.392475288 | 8.842680224 | 8.42453758  | 8.978950218 | 8.685028738 | 8.022837861 | 7.962114324 | 7.735724817 | 8.320520704 |
| PM13     | 7.280095245 | 8.175192882 | 8.846665312  | 8.175192882  | 8.763565832  | 8.846665312 | 8.846665312 | 8.609579834 | 8.701529328 | 8.401163218 | 8.209983579 | 8.14710186  | 8.242323423 | 8.42165551  | 8.715162262 | 8.464547265 | 7.875989576 | 7.627445145 |
| TRIM13   | 8.951906612 | 8.622064266 | 7.162045855  | 6.854794121  | 8.915070305  | 8.280671116 | 7.524997701 | 8.261781413 | 8.355943634 | 8.438396059 | 8.79978305  | 9.121412431 | 8.77324894  | 9.133499374 | 8.014366043 | 8.282409953 | 8.432229039 | 8.055251853 |
| SCAF3    | 8.534366617 | 7.685265231 | 8.052084882  | 8.20720221   | 8.70282579   | 8.476995744 | 8.018470811 | 8.240302248 | 7.950528512 | 8.481739192 | 8.40777843  | 8.308552529 | 8.972091638 | 8.809999981 | 8.203766012 | 8.623016881 | 8.31610646  | 8.196621673 |
| ADAM38P  | 8.775034347 | 7.583434347 | 8.20322132   | 8.20322132   | 8.775034347  | 8.20322132  | 8.20322132  | 8.19432132  | 8.19432132  | 8.19432132  | 8.19432132  | 8.19432132  | 8.19432132  | 8.19432132  | 8.19432132  | 8.19432132  | 8.19432132  | 8.19432132  |
| PADK     | 8.67619824  | 8.87961295  | 8.45740246   | 7.89270001   | 8.33554435   | 8.739570441 | 8.113805648 | 8.331885546 | 8.90470151  | 8.107259642 | 8.331885546 | 8.90470151  | 8.107259642 | 8.48622364  | 8.731040882 | 8.22762427  | 8.10073944  | 8.10073944  |
| HCTD4    | 7.97695359  | 7.73125909  | 7.934364774  | 8.746602021  | 7.760220846  | 8.543237182 | 6.979741483 | 8.487270952 | 8.06916285  | 8.345572172 | 8.292398578 | 7.778293942 | 8.38791659  | 8.17515936  | 8.408324723 | 6.64796321  | 9.171874042 | 8.579636839 |
| PPAT     | 8.009483309 | 6.609332727 | 8.273028462  | 8.671824236  | 8.661491548  | 7.104443184 | 8.107550108 | 8.764028264 | 8.674028264 | 8.107550108 | 8.364263145 | 9.132591984 | 8.113197846 | 9.101822012 | 7.857800512 | 8.626681646 | 8.37635074  | 8.767020308 |
| RRP30    | 7.70461127  | 8.601915983 | 8.861530965  | 8.90099763   | 8.46526933   | 8.868137772 | 8.854198881 | 7.959467177 | 8.282099171 | 8.35828192  | 8.317051257 | 7.545312554 | 8.716156451 | 8.372721629 | 7.791354444 | 8.276931029 | 8.318504445 | 8.869877495 |
| TCB1D10A | 8.459107126 | 7.845249713 | 8.596938028  | 8.464563922  | 7.911129422  | 8.640852884 | 8.382327581 | 8.379186451 | 8.196773519 | 8.137816451 | 8.158751491 | 8.788334979 | 8.196773519 | 7.934397217 | 8.253595356 | 8.134805283 | 8.18155777  | 8.69629727  |
| PAT1     | 8.288919154 | 7.849309648 | 7.388068774  | 7.68120422   | 8.316894808  | 8.16418026  | 8.644896061 | 8.789590538 | 8.604451153 | 8.473231331 | 8.923343052 | 7.016110788 | 7.85961234  | 8.708829309 | 8.58889702  | 8.318627994 | 8.900757013 | 8.269046613 |
| Gor47    | 9.04272654  | 8.703487353 | 7.712554534  | 7.712554534  | 8.405572533  | 8.405572533 | 8.423084368 | 7.965588231 | 8.494171093 | 7.81232527  | 7.858686976 | 8.39459097  | 8.349364337 | 8.94185763  | 8.291261064 | 8.73838672  | 7.996468804 | 7.996468804 |
| FE1      | 8.107655024 | 8.107655024 | 7.7265010324 | 7.7265010324 | 8.2605010324 | 7.89454046  | 7.113645593 | 8.836824805 | 8.400987477 | 8.400987477 | 8.170958368 | 8.170958368 | 8.170958368 | 8.170958368 | 8.170958368 | 8.170958368 | 8.170958368 | 8.170958368 |
| SORT1    | 8.978613134 | 8.014199836 | 8.283600557  | 8.389952529  | 8.782995568  | 8.002279685 | 8.133598118 | 8.443263901 | 8.170105438 | 8.347690223 | 8.439395141 | 7.77423194  | 7.394470814 | 8.407152748 | 8.500748702 | 7.811635701 | 8.167880242 | 8.370558339 |
| DEPT     | 8.94867179  | 8.93192169  | 8.654349533  | 8.72453748   | 9.104975147  | 7.965148101 | 8.301236624 | 7.965148101 | 8.944698966 | 8.286442111 | 9.138651946 | 8.027021298 | 7.12671459  | 7.645903148 | 8.074276533 | 8.096039654 | 8.777486152 | 8.147522724 |
| RR1-544M | 7.662657355 | 8.344303673 | 7.46232425   | 8.03602409   | 7.868496694  | 8.365195387 | 7.271915955 | 8.445213904 | 8.058264574 | 7.828171691 | 8.6768063   | 8.0495731   | 9.231250219 | 8.480197249 | 8.285035059 | 8.76298908  | 8.185600441 | 9.65835137  |
| UCB4     | 8.27314399  | 8.959592    | 8.647532739  | 8.385292018  | 8.248134771  | 8.248134771 | 8.613029319 | 8.355686001 | 8.474227927 | 8.086984716 | 8.061553195 | 8.82557228  | 8.752422883 | 8.854154485 | 8.153035018 | 8.23255049  | 8.102610252 | 8.430531997 |
| RUM      | 8.203288944 | 7.625414715 | 8.356887139  | 7.87137107   | 9.025715107  | 8.340076853 | 8.340076853 | 8.287367862 | 8.245211921 | 8.223058268 | 8.624309814 | 7.913158402 | 8.962279418 | 7.651078992 | 8.622384098 | 8.931390539 | 8.2550497   | 8.2550497   |
| ZDDHC4   | 7.252665959 | 8.932214891 | 8.507794174  | 8.681466971  | 7.57174222   | 6.49655495  | 8.340591415 | 8.17186916  | 8.304591415 |             |             |             |             |             |             |             |             |             |

|             |             |             |             |             |             |             |             |             |             |             |             |             |             |             |             |             |             |             |
|-------------|-------------|-------------|-------------|-------------|-------------|-------------|-------------|-------------|-------------|-------------|-------------|-------------|-------------|-------------|-------------|-------------|-------------|-------------|
| TMEM168     | 7.585206773 | 6.26827226  | 8.225230187 | 8.407856981 | 8.122472998 | 7.76914617  | 7.52706561  | 8.351980946 | 8.428322756 | 8.536753587 | 7.63060528  | 9.210154008 | 6.475694234 | 8.387185617 | 8.516473166 | 8.683144411 | 8.111453335 | 8.377299075 |
| STAMPB      | 8.00122784  | 8.001170004 | 8.533082832 | 8.367170579 | 8.204766555 | 7.781518715 | 7.716684084 | 7.918971315 | 8.088121888 | 8.448484416 | 8.365649619 | 8.93549735  | 8.80335562  | 8.518993508 | 8.036801076 | 8.211216109 | 8.511490007 | 8.192248351 |
| GNPNAT1     | 8.40779278  | 8.284856117 | 8.179975283 | 7.996010667 | 8.774660525 | 8.599479547 | 8.155214597 | 8.168071315 | 8.515990841 | 8.291808743 | 8.34223666  | 8.940373032 | 6.505494242 | 8.08554719  | 7.98877603  | 7.928069537 | 8.51820425  | 8.75422361  |
| CH06        | 9.122229925 | 7.99435624  | 6.77742486  | 7.92904474  | 8.168971473 | 7.650745049 | 8.503353331 | 8.60287465  | 8.38668277  | 8.660229258 | 8.685646767 | 8.010160361 | 6.55282066  | 7.856876452 | 8.308002519 | 8.809176344 | 8.720315324 | 8.268257483 |
| CE11        | 8.42979094  | 8.51764625  | 8.28146525  | 8.510073293 | 8.28146525  | 8.396232287 | 8.391161998 | 8.333140322 | 8.23257463  | 8.05196067  | 8.09068517  | 8.05793943  | 8.29477981  | 8.05653010  | 8.26543942  | 8.05653010  | 8.26543942  | 8.05653010  |
| RFK2        | 9.772852787 | 7.206414852 | 7.114923954 | 8.118129394 | 8.118129394 | 8.066878003 | 8.246111203 | 8.134495268 | 8.134495268 | 8.134495268 | 8.134495268 | 8.134495268 | 8.134495268 | 8.134495268 | 8.134495268 | 8.134495268 | 8.134495268 | 8.134495268 |
| GRAMD4      | 8.05653671  | 8.318460533 | 7.832262589 | 8.352714142 | 7.94605795  | 7.940438889 | 8.099590687 | 8.257723286 | 8.499366510 | 8.3389598   | 8.076028421 | 8.35658147  | 7.895599087 | 9.15457124  | 8.637339619 | 7.976705078 | 8.37978587  | 8.65528239  |
| 8.300702472 | 8.065800554 | 6.705974098 | 8.329585847 | 8.280108513 | 7.940431507 | 8.056397126 | 8.329585847 | 8.280108513 | 8.487616112 | 8.41456871  | 8.042926119 | 8.819043721 | 8.610214863 | 8.610214863 | 8.424056791 | 8.412340565 | 8.713240565 | 8.713240565 |
| RHD14       | 8.317604832 | 8.19885735  | 8.107483892 | 8.711261683 | 8.415509877 | 8.163512218 | 8.417969258 | 7.95241485  | 8.283127997 | 8.403912194 | 8.289212946 | 8.952723276 | 8.122257615 | 8.724904485 | 7.709388532 | 8.175773118 | 8.345057304 | 8.013096788 |
| USF2        | 7.525416485 | 8.26425302  | 8.18001457  | 8.264277966 | 8.264277966 | 8.562533009 | 8.562533009 | 8.40526457  | 8.40526457  | 8.40526457  | 8.40526457  | 8.40526457  | 8.40526457  | 8.40526457  | 8.40526457  | 8.40526457  | 8.40526457  | 8.40526457  |
| ADSL0       | 7.8001457   | 8.172297784 | 8.401121786 | 8.31866621  | 8.551258816 | 8.401124256 | 7.999861363 | 8.390193891 | 8.128548308 | 8.128548308 | 8.189974401 | 8.098862621 | 8.424540527 | 9.790342581 | 8.249330687 | 8.449954032 | 8.796876996 | 8.449954032 |
| TRAPP68B    | 8.06800561  | 8.29047397  | 8.688903503 | 7.712637251 | 8.574150553 | 8.29666738  | 8.29666738  | 8.262136826 | 8.562663619 | 8.26579418  | 8.46073328  | 7.435235397 | 8.603962469 | 8.603962469 | 7.755629344 | 8.243114515 | 8.411030241 | 7.755629344 |
| PTS         | 8.106877657 | 8.370455806 | 8.509823987 | 8.24732225  | 8.283365493 | 8.286958382 | 8.496758063 | 8.132197271 | 8.011938025 | 8.240337641 | 8.48806748  | 8.739063695 | 8.29652153  | 8.560164194 | 8.005709566 | 8.149873440 | 8.637720159 | 8.637720159 |
| CDR2        | 8.523827946 | 8.136296467 | 8.284054178 | 7.504104408 | 8.143514017 | 9.120133821 | 8.506536511 | 7.8213590   | 8.68939199  | 7.462447927 | 8.184723637 | 8.295186322 | 9.2514033   | 7.815146691 | 8.284720835 | 8.7388015   | 7.911188005 | 8.24750875  |
| SIRT3       | 8.376434314 | 8.376434314 | 8.376434314 | 8.376434314 | 8.376434314 | 8.376434314 | 8.376434314 | 8.376434314 | 8.376434314 | 8.376434314 | 8.376434314 | 8.376434314 | 8.376434314 | 8.376434314 | 8.376434314 | 8.376434314 | 8.376434314 | 8.376434314 |
| COL6A1      | 8.813786869 | 8.330921263 | 8.107346487 | 8.00444144  | 7.923043442 | 8.370601378 | 8.291070117 | 8.451365046 | 8.291294368 | 8.591438628 | 7.873790428 | 8.06623455  | 8.276144117 | 8.789817741 | 8.753796048 | 7.893455968 | 8.392507355 | 7.845277787 |
| PM20D2      | 8.102105871 | 8.336145618 | 8.336145618 | 8.336145618 | 8.336145618 | 8.336145618 | 8.336145618 | 8.336145618 | 8.336145618 | 8.336145618 | 8.336145618 | 8.336145618 | 8.336145618 | 8.336145618 | 8.336145618 | 8.336145618 | 8.336145618 | 8.336145618 |
| RWD4A       | 8.23672662  | 8.65412714  | 8.599524162 | 8.382893326 | 8.745886535 | 8.745886535 | 7.922565611 | 8.45088362  | 8.133092075 | 8.336228989 | 8.423004923 | 7.922565611 | 8.554762468 | 7.990594313 | 6.715758243 | 7.85077812  | 8.318128578 | 8.318128578 |
| AC3A1       | 9.448145773 | 8.494816566 | 9.448145773 | 8.180364522 | 8.66504848  | 8.347647808 | 7.892470075 | 8.568368005 | 7.996702579 | 8.21782039  | 8.979720096 | 8.125862038 | 9.077125382 | 8.145757399 | 8.075999321 | 8.39706182  | 8.182819674 | 8.182819674 |
| CAD5B       | 7.592594688 | 8.39833684  | 9.861169335 | 8.123236233 | 8.761581632 | 7.615342843 | 8.883834139 | 7.712425447 | 8.469382916 | 8.221824223 | 7.79901202  | 8.028707973 | 5.971064546 | 7.575640326 | 8.637736777 | 8.165331295 | 8.036911646 | 10.07169067 |
| IG1         | 8.151571728 | 8.580519688 | 8.003579343 | 8.184366783 | 8.572715754 | 8.185056486 | 8.752224405 | 8.265800988 | 8.496048002 | 8.193044887 | 8.271896096 | 9.535205757 | 6.648590451 | 8.423090989 | 8.276794179 | 8.465100304 | 8.28652504  | 8.28652504  |
| ABHD11      | 8.075907177 | 8.049690890 | 8.172234275 | 8.58107843  | 7.981198323 | 8.05212877  | 8.05212877  | 8.05212877  | 8.05212877  | 8.05212877  | 8.05212877  | 8.05212877  | 8.05212877  | 8.05212877  | 8.05212877  | 8.05212877  | 8.05212877  | 8.05212877  |
| PEX10       | 8.68001379  | 9.021674454 | 8.440286233 | 8.049185121 | 8.76654391  | 8.002985137 | 8.769204564 | 7.689594401 | 8.327954807 | 7.941824569 | 8.147308872 | 8.056077336 | 8.736696777 | 7.78238772  | 8.57852788  | 8.23459735  | 8.223728834 | 8.082475975 |
| BRAF        | 8.088307314 | 8.658251814 | 8.727978342 | 8.58251814  | 8.727978342 | 8.242192463 | 8.956244191 | 8.086767784 | 8.580050792 | 8.580050792 | 8.580050792 | 8.580050792 | 8.580050792 | 8.580050792 | 8.580050792 | 8.580050792 | 8.580050792 | 8.580050792 |
| PK3K3       | 8.894338839 | 8.317527304 | 7.682049732 | 8.010863126 | 7.897689535 | 8.360470371 | 8.2303571   | 8.132434687 | 8.056682821 | 8.328156667 | 8.193227209 | 9.248638633 | 8.820895704 | 9.325089781 | 7.930626413 | 8.702749225 | 8.16270356  | 8.16270356  |
| ERNARD      | 9.271977088 | 8.547169384 | 7.148719109 | 8.0300588   | 8.57989779  | 7.95133843  | 8.864179313 | 8.31899563  | 8.241846348 | 7.96750552  | 8.384529002 | 9.019038042 | 9.096871663 | 8.033545758 | 8.084521347 | 8.354206272 | 8.718972048 | 8.718972048 |
| R4B5C       | 8.201258074 | 9.022360492 | 8.699941173 | 8.787283065 | 8.801554128 | 8.833890232 | 8.938280495 | 8.300340482 | 8.548433708 | 8.33777881  | 8.115721994 | 8.08090092  | 7.811860511 | 7.841815395 | 8.027954184 | 8.06253745  | 7.987599448 | 8.001393225 |
| UC2         | 7.890347674 | 8.896482779 | 7.29141568  | 8.13280725  | 8.82406273  | 8.02508197  | 8.02508197  | 8.02508197  | 8.02508197  | 8.02508197  | 8.02508197  | 8.02508197  | 8.02508197  | 8.02508197  | 8.02508197  | 8.02508197  | 8.02508197  | 8.02508197  |
| MERTK       | 7.987907627 | 8.03462594  | 8.730897916 | 9.016244005 | 7.405628574 | 8.10473633  | 8.22933637  | 8.67959722  | 8.757615456 | 8.51519083  | 8.23652876  | 8.504739077 | 8.320155669 | 9.190880507 | 8.23903206  | 8.485359414 | 8.363512846 | 8.035288415 |
| AP0F1       | 8.340839865 | 8.56968903  | 8.784299768 | 8.284261002 | 8.402419237 | 8.739523219 | 8.328904663 | 7.998409158 | 8.695939431 | 8.266850433 | 9.070764295 | 8.563482363 | 7.791678522 | 8.090293701 | 7.817925717 | 8.589593294 | 8.176327784 | 8.176327784 |
| NSMCE2      | 8.184377771 | 7.901479631 | 8.039798173 | 8.004393799 | 8.819689022 | 8.09937889  | 8.247866006 | 8.505146309 | 8.159448252 | 8.22267425  | 8.492770094 | 8.380331691 | 6.706630544 | 6.935253144 | 8.400464843 | 8.477232474 | 8.308533215 | 7.963736857 |
| USP1        | 7.889194716 | 8.66908843  | 7.77385491  | 8.444538089 | 8.486597323 | 7.89831632  | 7.98840421  | 8.016811824 | 8.746650624 | 8.459773872 | 9.012118124 | 8.55191351  | 8.81264518  | 7.974567627 | 8.739048449 | 8.077683837 | 8.06906903  | 8.06906903  |
| KHLH7       | 7.704874158 | 8.686086349 | 8.484727757 | 8.690631427 | 8.433407707 | 8.681848584 | 7.54614804  | 8.098723586 | 8.098723586 | 8.04788922  | 8.18415558  | 8.288517046 | 8.263975442 | 8.01174815  | 7.73360361  | 8.334298893 | 8.029450589 | 8.029450589 |
| CorF8       | 8.18512413  | 8.298635633 | 8.110751654 | 8.705624777 | 7.94781906  | 8.165128734 | 8.400854958 | 8.25380117  | 8.121096968 | 8.094024801 | 7.950127099 | 8.131073028 | 8.580561118 | 7.749796717 | 8.04403782  | 8.40363666  | 8.123752326 | 8.123752326 |
| INP         | 8.166489961 | 7.797483548 | 8.753739094 | 8.75081894  | 8.36226099  | 7.95600422  | 8.668467118 | 8.300148586 | 7.937916155 | 8.083282096 | 8.139485668 | 8.772319059 | 8.450033909 | 8.571904057 | 8.250199864 | 8.065418276 | 7.924630567 | 8.669915262 |
| Z23         | 8.76500119  | 8.80931268  | 8.310119867 | 8.09517104  | 8.34361551  | 7.920903034 | 8.257306642 | 8.866743333 | 8.479878844 | 8.419878844 | 8.040340658 | 8.224208588 | 7.562704258 | 8.033442191 | 8.363345371 | 8.325933916 | 8.425094726 | 8.152149871 |
| SLC10A7     | 8.677913232 | 8.56473601  | 7.100229731 | 8.403558152 | 7.010183329 | 8.48244163  | 6.969160688 | 8.265932271 | 8.128784299 | 8.156411069 | 8.283280829 | 8.155388975 | 8.076374281 | 8.841990095 | 8.413636409 | 8.826675416 | 7.959099780 | 8.826675416 |
| TEN1        | 8.426654535 | 8.29032338  | 7.97414248  | 8.496554548 | 8.238096687 | 7.83545277  | 8.150383604 | 8.016811824 | 8.746650624 | 8.459773872 | 9.012118124 | 8.55191351  | 8.81264518  | 7.974567627 | 8.739048449 | 8.077683837 | 8.06906903  | 8.06906903  |
| C10a07      | 8.289782224 | 8.870772168 | 7.138402927 | 7.402816329 | 7.696676411 | 8.89825921  | 8.898472461 | 8.864873877 | 8.741550934 | 8.327004203 | 5.947296418 | 6.768181292 | 8.43023625  | 8.447285449 | 7.80014565  | 6.581861026 | 7.66285194  | 7.66285194  |
| ZHHT3       | 8.421354252 | 8.61354252  | 8.28578773  | 8.57857869  | 8.382482117 | 8.618798887 | 8.748122301 | 8.307591587 | 8.28119434  | 8.035638589 | 8.620417671 | 8.619405378 | 7.647678782 | 7.955278304 | 8.422399882 | 8.139967838 | 8.398416626 | 8.398416626 |
| FAM23A      | 8.357916557 | 8.339581222 | 8.059483568 | 8.293697972 | 8.246877283 | 8.041517327 | 9.134875359 | 7.821351347 | 8.404797743 | 8.231256235 | 8.663937574 | 7.975260403 | 7.913048389 | 8.527245336 | 8.427121819 | 8.199233738 | 8.959149863 | 8.959149863 |
| ACHY1       | 7.239234077 | 7.697251599 | 8.575885671 | 8.33004656  | 8.106928864 | 8.504752521 | 8.106928864 | 8.271069901 | 8.26213574  | 8.392323574 | 7.910359    |             |             |             |             |             |             |             |

|          |              |             |             |             |             |             |             |             |             |             |             |             |             |             |             |             |             |             |
|----------|--------------|-------------|-------------|-------------|-------------|-------------|-------------|-------------|-------------|-------------|-------------|-------------|-------------|-------------|-------------|-------------|-------------|-------------|
| COQ10A   | 8.367140839  | 7.53142764  | 7.917482339 | 8.012150608 | 8.25761182  | 8.202864027 | 7.907496854 | 8.468019082 | 8.248625487 | 8.569218423 | 8.431176641 | 8.462472111 | 7.972546372 | 8.250013813 | 8.965872908 | 8.198934239 | 8.479259594 | 8.007721657 |
| CDC9C    | 8.190731692  | 8.147193114 | 7.894110738 | 7.907367429 | 8.377659488 | 7.700230731 | 8.439704215 | 8.288192319 | 8.101264443 | 8.380158225 | 8.262817419 | 8.608451112 | 8.233460096 | 8.379149937 | 8.185958336 | 8.710672913 |             |             |
| PK3R4    | 8.528093480  | 8.584505688 | 6.593849585 | 8.168770565 | 8.375691181 | 5.798585971 | 8.693791883 | 8.054432677 | 8.365643061 | 7.973419517 | 8.49169017  | 8.380158225 | 8.262817419 | 8.608451112 | 8.233460096 | 8.379149937 | 8.185958336 | 8.710672913 |
| MGMT     | 7.954952155  | 9.083296691 | 8.345137357 | 8.343360956 | 9.023629345 | 8.775259854 | 8.613235986 | 7.45282964  | 8.652960014 | 8.229173428 | 8.247272822 | 8.018477891 | 9.135000325 | 7.567492572 | 6.648520115 | 8.245871545 | 7.661193889 | 7.956748914 |
| YVDS     | 6.542720469  | 7.997856672 | 8.339886972 | 8.344462945 | 8.20139197  | 8.236781794 | 7.489730327 | 8.200508432 | 8.202224342 | 8.201079747 | 8.264811051 | 6.540789328 | 7.954545594 | 8.2461394   | 8.2461394   | 8.775465391 | 8.24476928  | 8.171895891 |
| ATPV1C1  | 8.947972352  | 8.784727757 | 8.561378457 | 8.561378457 | 8.661350588 | 7.97242046  | 7.454561124 | 8.430490988 | 8.480099338 | 8.455999737 | 8.167007002 | 6.828536501 | 8.252977168 | 8.259007616 | 8.581647508 | 8.581647508 | 8.162380246 |             |
| MAP3K3   | 8.225377803  | 8.892233379 | 8.12374853  | 9.1006474   | 8.927722203 | 8.257651022 | 8.108832733 | 8.496417234 | 8.26451968  | 8.30552484  | 8.48836596  | 7.957431979 | 6.454410358 | 7.484754796 | 8.554195978 | 7.863964548 | 8.155304898 | 8.94016529  |
| SCM1H    | 8.128611813  | 8.067182656 | 8.17638786  | 8.29624578  | 8.17638786  | 7.842980584 | 8.688788404 | 8.468454014 | 8.205236977 | 8.645980556 | 8.370545712 | 8.198945513 | 8.759419993 | 9.057972301 | 7.916575054 | 8.500295643 | 8.625116387 | 8.133830511 |
| GNP2     | 8.790267151  | 8.977908482 | 8.411192831 | 8.154303588 | 8.839222866 | 7.95687661  | 8.369686285 | 8.144613347 | 8.21497414  | 8.217465361 | 8.504796669 | 7.933236132 | 7.903344709 | 7.7816851   | 8.039435875 | 8.490495153 | 8.330252    | 8.372974355 |
| C1R      | 7.814888931  | 8.71922426  | 8.179634787 | 8.179634787 | 8.30832266  | 8.071822923 | 8.477652631 | 8.785190199 | 8.346866722 | 8.549339432 | 8.393674223 | 8.473282901 | 6.774855382 | 7.230452154 | 8.649906623 | 8.020117612 | 8.370995142 | 8.167530296 |
| YD1C     | 8.62504674   | 8.630568004 | 8.630568004 | 8.577431093 | 8.26620409  | 8.573986937 | 7.914374918 | 8.185101463 | 8.185101463 | 8.185101463 | 8.185101463 | 8.185101463 | 8.185101463 | 8.185101463 | 8.185101463 | 8.185101463 | 8.185101463 | 8.185101463 |
| OC1S     | 8.96397582   | 8.102372944 | 8.654612459 | 9.110907892 | 7.367557364 | 8.328984886 | 9.157139308 | 7.573403138 | 8.819168464 | 8.819168464 | 8.819168464 | 8.819168464 | 8.819168464 | 8.819168464 | 8.819168464 | 8.819168464 | 8.819168464 | 8.819168464 |
| ED1      | 7.756002851  | 8.363020859 | 8.039201772 | 8.28589069  | 7.554315494 | 9.08415777  | 8.0051323   | 8.092554428 | 8.259306291 | 8.094059475 | 7.950514387 | 8.190098572 | 8.373570452 | 8.41081288  | 8.211190567 | 8.687120675 |             |             |
| FTS1J    | 9.114593036  | 8.413541375 | 8.326406872 | 8.019848327 | 8.95874361  | 8.078265272 | 8.075440633 | 8.499415608 | 8.672251873 | 8.40399669  | 8.326551338 | 8.190527566 | 6.635471425 | 7.204422714 | 8.2819039   | 8.408686762 | 8.203149784 | 7.680931801 |
| TRGFRAP1 | 8.258683555  | 7.421608936 | 7.775411031 | 7.775411031 | 8.15642769  | 8.307701592 | 8.204468689 | 8.832472061 | 8.007277116 | 8.185182765 | 8.264601943 | 8.32461621  | 8.483891443 | 7.95187669  | 6.24563006  | 7.892163823 | 8.23685411  | 8.248043639 |
| ARHGF5   | 8.140487214  | 9.281043745 | 8.442882821 | 8.977798716 | 8.845115372 | 7.974940163 | 8.147484001 | 8.242809907 | 8.133540733 | 7.712612073 | 8.241695426 | 8.130459838 | 8.388166258 | 9.106950001 | 8.377571276 | 8.153915202 | 8.182582548 | 8.646871126 |
| TRAP1C1  | 8.376283332  | 8.221793085 | 8.681088513 | 8.459826837 | 8.383938623 | 8.26233774  | 8.568367255 | 8.154967343 | 7.810014631 | 7.9802485   | 8.34584825  | 8.32013376  | 8.564224247 | 7.919198427 | 7.949928347 | 7.629840974 | 7.924320237 |             |
| ZN7F61   | 8.509560656  | 7.397655872 | 8.885513847 | 8.271186949 | 7.433790604 | 8.679155603 | 8.211369439 | 8.305626043 | 7.964866003 | 8.027415488 | 8.793034887 | 9.050250903 | 8.716261397 | 8.198768806 | 8.272002873 | 8.162847968 | 8.171299009 |             |
| C1OCK    | 7.683864616  | 7.186401913 | 8.500098565 | 8.202799716 | 7.926064379 | 8.102515909 | 7.5447744   | 8.591406044 | 8.169051332 | 8.112190988 | 8.595354419 | 9.576670296 | 7.419016805 | 8.037743373 | 8.280232704 | 8.882480668 | 8.293010155 |             |
| FAM1208A | 8.117282314  | 8.756231414 | 8.611310077 | 8.227402141 | 7.544865547 | 8.113611542 | 8.735307272 | 8.150741163 | 8.455289982 | 8.314179935 | 7.893706748 | 7.471279544 | 7.372938267 | 7.930407347 | 8.652196674 | 8.168286391 | 8.626077159 | 8.25573127  |
| FAM156A2 | 8.8959116919 | 9.185432559 | 8.786438738 | 8.386526246 | 8.445566176 | 7.719073584 | 8.550891131 | 8.100729098 | 7.74825455  | 8.252331208 | 7.676976268 | 8.53323698  | 8.17332933  | 8.005974004 | 7.698731661 | 8.030451252 | 8.28984855  | 8.935840773 |
| NAXD     | 8.12502323   | 8.045847189 | 7.990237963 | 8.301156272 | 7.823857989 | 8.155548677 | 8.92455729  | 8.257915246 | 8.009290618 | 8.25914566  | 8.009290618 | 8.268421257 | 9.299889652 | 9.264612951 | 8.407251196 | 7.9191062   | 8.226218684 |             |
| CDC2C2   | 7.845908763  | 8.711458319 | 8.362289466 | 8.840105302 | 9.025537251 | 7.448268777 | 8.549028598 | 8.248008928 | 8.412941346 | 8.070944166 | 8.33378183  | 7.371731281 | 7.718727408 | 8.234187379 | 8.143272715 | 8.166131219 | 7.89095424  | 8.191978957 |
| K19F18   | 8.073287841  | 7.874911406 | 8.329400911 | 8.266126725 | 7.733040453 | 8.182742606 | 7.977768343 | 8.235111032 | 7.977768343 | 8.345110941 | 8.431521293 | 7.033922425 | 9.950897744 | 7.225315264 | 8.345506877 | 8.547036316 | 8.243893802 | 8.28178522  |
| NOA1     | 8.253063595  | 8.108446473 | 8.62424687  | 9.261162296 | 8.354847299 | 8.197964459 | 8.397147519 | 8.119533769 | 9.021476168 | 8.223122731 | 8.491041218 | 8.631725727 | 7.841196217 | 8.219998538 | 8.791497426 | 8.410780559 | 8.099892687 | 8.41115534  |
| POLL     | 8.619909969  | 6.983464195 | 8.158521691 | 7.917062602 | 8.79001465  | 7.872471022 | 8.739101114 | 8.245502167 | 8.113966311 | 8.200201924 | 8.29928822  | 8.439156568 | 7.738546371 | 8.230565571 | 8.041082056 | 8.396690329 | 8.41594497  | 7.776478189 |
| MAP8K8   | 7.831457543  | 8.435050455 | 9.270947825 | 8.31782931  | 8.158122654 | 7.978652864 | 6.807096435 | 8.465163887 | 8.401476848 | 8.09766904  | 8.169516057 | 9.934575034 | 5.282061247 | 8.512044608 | 8.407704252 | 8.588640977 | 7.98641964  | 7.776478189 |
| FAM156A2 | 8.8959116919 | 9.185432559 | 8.786438738 | 8.386526246 | 8.445566176 | 7.719073584 | 8.550891131 | 8.100729098 | 7.74825455  | 8.252331208 | 7.676976268 | 8.53323698  | 8.17332933  | 8.005974004 | 7.698731661 | 8.030451252 | 8.28984855  | 8.935840773 |
| NAXD     | 8.12502323   | 8.045847189 | 7.990237963 | 8.301156272 | 7.823857989 | 8.155548677 | 8.92455729  | 8.257915246 | 8.009290618 | 8.25914566  | 8.009290618 | 8.268421257 | 9.299889652 | 9.264612951 | 8.407251196 | 7.9191062   | 8.226218684 |             |
| CDC2C2   | 7.845908763  | 8.711458319 | 8.362289466 | 8.840105302 | 9.025537251 | 7.448268777 | 8.549028598 | 8.248008928 | 8.412941346 | 8.070944166 | 8.33378183  | 7.371731281 | 7.718727408 | 8.234187379 | 8.143272715 | 8.166131219 | 7.89095424  | 8.191978957 |
| K19F18   | 8.073287841  | 7.874911406 | 8.329400911 | 8.266126725 | 7.733040453 | 8.182742606 | 7.977768343 | 8.235111032 | 7.977768343 | 8.345110941 | 8.431521293 | 7.033922425 | 9.950897744 | 7.225315264 | 8.345506877 | 8.547036316 | 8.243893802 | 8.28178522  |
| NOA1     | 8.253063595  | 8.108446473 | 8.62424687  | 9.261162296 | 8.354847299 | 8.197964459 | 8.397147519 | 8.119533769 | 9.021476168 | 8.223122731 | 8.491041218 | 8.631725727 | 7.841196217 | 8.219998538 | 8.791497426 | 8.410780559 | 8.099892687 | 8.41115534  |
| POLL     | 8.619909969  | 6.983464195 | 8.158521691 | 7.917062602 | 8.79001465  | 7.872471022 | 8.739101114 | 8.245502167 | 8.113966311 | 8.200201924 | 8.29928822  | 8.439156568 | 7.738546371 | 8.230565571 | 8.041082056 | 8.396690329 | 8.41594497  | 7.776478189 |
| MAP8K8   | 7.831457543  | 8.435050455 | 9.270947825 | 8.31782931  | 8.158122654 | 7.978652864 | 6.807096435 | 8.465163887 | 8.401476848 | 8.09766904  | 8.169516057 | 9.934575034 | 5.282061247 | 8.512044608 | 8.407704252 | 8.588640977 | 7.98641964  | 7.776478189 |
| FAM156A2 | 8.8959116919 | 9.185432559 | 8.786438738 | 8.386526246 | 8.445566176 | 7.719073584 | 8.550891131 | 8.100729098 | 7.74825455  | 8.252331208 | 7.676976268 | 8.53323698  | 8.17332933  | 8.005974004 | 7.698731661 | 8.030451252 | 8.28984855  | 8.935840773 |
| NAXD     | 8.12502323   | 8.045847189 | 7.990237963 | 8.301156272 | 7.823857989 | 8.155548677 | 8.92455729  | 8.257915246 | 8.009290618 | 8.25914566  | 8.009290618 | 8.268421257 | 9.299889652 | 9.264612951 | 8.407251196 | 7.9191062   | 8.226218684 |             |
| CDC2C2   | 7.845908763  | 8.711458319 | 8.362289466 | 8.840105302 | 9.025537251 | 7.448268777 | 8.549028598 | 8.248008928 | 8.412941346 | 8.070944166 | 8.33378183  | 7.371731281 | 7.718727408 | 8.234187379 | 8.143272715 | 8.166131219 | 7.89095424  | 8.191978957 |
| K19F18   | 8.073287841  | 7.874911406 | 8.329400911 | 8.266126725 | 7.733040453 | 8.182742606 | 7.977768343 | 8.235111032 | 7.977768343 | 8.345110941 | 8.431521293 | 7.033922425 | 9.950897744 | 7.225315264 | 8.345506877 | 8.547036316 | 8.243893802 | 8.28178522  |
| NOA1     | 8.253063595  | 8.108446473 | 8.62424687  | 9.261162296 | 8.354847299 | 8.197964459 | 8.397147519 | 8.119533769 | 9.021476168 | 8.223122731 | 8.491041218 | 8.631725727 | 7.841196217 | 8.219998538 | 8.791497426 | 8.410780559 | 8.099892687 | 8.41115534  |
| POLL     | 8.619909969  | 6.983464195 | 8.158521691 | 7.917062602 | 8.79001465  | 7.872471022 | 8.739101114 | 8.245502167 | 8.113966311 | 8.200201924 | 8.29928822  | 8.439156568 | 7.738546371 | 8.230565571 | 8.041082056 | 8.396690329 | 8.41594497  | 7.776478189 |
| MAP8K8   | 7.831457543  | 8.435050455 | 9.270947825 | 8.31782931  | 8.158122654 | 7.978652864 | 6.807096435 | 8.465163887 | 8.401476848 | 8.09766904  | 8.169516057 | 9.934575034 | 5.282061247 | 8.512044608 | 8.407704252 | 8.588640977 | 7.98641964  | 7.776478189 |
| FAM156A2 | 8.8959116919 | 9.185432559 | 8.786438738 | 8.386526246 | 8.445566176 | 7.719073584 | 8.550891131 | 8.100729098 | 7.74825455  | 8.252331208 | 7.676976268 | 8.53323698  | 8.17332933  |             |             |             |             |             |

|          |             |              |             |              |             |             |             |             |             |             |             |             |             |             |             |             |             |             |
|----------|-------------|--------------|-------------|--------------|-------------|-------------|-------------|-------------|-------------|-------------|-------------|-------------|-------------|-------------|-------------|-------------|-------------|-------------|
| PHK2A    | 9.12194708  | 8.94296315   | 8.43893296  | 8.65672874   | 7.27158913  | 7.57416297  | 8.01639246  | 8.267402017 | 8.163240318 | 8.125206239 | 7.97336996  | 8.542354513 | 7.645469479 | 8.258869973 | 8.635459066 | 8.323597074 | 7.862097551 | 7.964034562 |
| THOC3    | 9.155729298 | 7.315729298  | 7.847116924 | 8.563556275  | 8.30905336  | 7.936641456 | 8.323453861 | 8.178151503 | 8.16635886  | 8.100272512 | 8.22573735  | 8.327489814 | 8.470720047 | 8.506651166 | 7.77623779  | 8.139279251 | 8.195978749 | 8.332412585 |
| FOCAD    | 7.804032495 | 7.685152011  | 8.588495939 | 8.589456521  | 7.57072286  | 7.01999807  | 8.26274504  | 8.680738663 | 7.574772023 | 8.686873554 | 8.005700558 | 7.814475531 | 6.70323878  | 7.80593335  | 8.508822809 | 8.994826679 | 8.495770698 | 8.387570698 |
| NUPS8    | 8.176485646 | 7.87495826   | 6.909358873 | 8.4171744261 | 8.631354056 | 8.115785033 | 7.881166235 | 8.205515182 | 8.392681713 | 8.497285638 | 8.3946126   | 8.640037989 | 8.824307321 | 8.484190728 | 8.426613513 | 8.287378756 | 8.214931085 | 7.939364634 |
| HSTJHZBK | 8.319757381 | 8.106649047  | 8.106649047 | 8.106649047  | 8.43179324  | 8.39603516  | 8.43179324  | 8.18449456  | 8.27132326  | 7.915571788 | 8.33361204  | 8.20765027  | 7.95739797  | 8.21976837  | 8.21976837  | 8.1119635   | 8.137611981 | 8.137611981 |
| PUM3     | 8.262515089 | 8.676401889  | 8.764014876 | 7.694314063  | 8.191848054 | 8.019716635 | 7.92004734  | 8.096313871 | 7.808000075 | 8.096313871 | 8.249313871 | 8.795301358 | 8.464153629 | 8.002130666 | 8.12439366  | 8.172907767 | 8.230917635 | 8.230917635 |
| CMC1     | 7.75139821  | 9.234370442  | 7.436776666 | 8.964161174  | 8.68890596  | 8.52882309  | 8.181915445 | 6.736419141 | 8.235070324 | 7.937440661 | 8.014913697 | 8.853254114 | 8.152196062 | 8.784194411 | 7.95483061  | 7.937993918 | 8.083484104 | 8.562091217 |
| MRRF     | 7.230979624 | 8.294729382  | 7.688528285 | 8.132828124  | 8.13120838  | 7.959306618 | 8.553957188 | 8.188390962 | 8.375850685 | 8.30424669  | 7.948783235 | 7.274552991 | 8.27783865  | 8.990116381 | 8.503361634 | 8.163407564 | 8.643898126 | 8.251051695 |
| CCDC10   | 8.686471397 | 8.147371237  | 8.381207588 | 7.133457237  | 8.26839899  | 7.740318843 | 7.880851266 | 7.773564532 | 8.601807214 | 8.457520834 | 8.125598507 | 8.958949731 | 8.627786678 | 8.502651609 | 7.593497446 | 8.34706514  | 8.566545251 | 7.003073879 |
| NUPS4    | 8.358702186 | 8.350742106  | 8.060838196 | 8.37421584   | 8.29510813  | 8.364258283 | 8.364258283 | 8.638243529 | 8.117833793 | 8.382350952 | 8.152557572 | 8.522377123 | 8.036470747 | 7.234914513 | 7.69895224  | 8.331274155 | 8.364069761 | 8.117022141 |
| FAM13A   | 8.599746356 | 7.4104084591 | 8.060838196 | 8.37421584   | 8.29510813  | 8.364258283 | 8.364258283 | 8.638243529 | 8.117833793 | 8.382350952 | 8.152557572 | 8.522377123 | 8.036470747 | 7.234914513 | 7.69895224  | 8.331274155 | 8.364069761 | 8.117022141 |
| BR71     | 8.383542222 | 7.974368083  | 8.262190991 | 8.262190991  | 8.262190991 | 8.262190991 | 8.262190991 | 8.262190991 | 8.262190991 | 8.262190991 | 8.262190991 | 8.262190991 | 8.262190991 | 8.262190991 | 8.262190991 | 8.262190991 | 8.262190991 | 8.262190991 |
| RAB7     | 8.474143967 | 7.740501658  | 8.31143473  | 7.926863858  | 7.695638816 | 8.469553497 | 7.896908966 | 8.157660985 | 7.973467884 | 8.603632574 | 8.521809336 | 8.480011019 | 8.058341651 | 8.251578896 | 8.354770087 | 7.180703932 |             |             |
| METL10   | 7.037885646 | 8.788158833  | 8.23190827  | 8.406042604  | 8.02975744  | 8.295121392 | 7.99442266  | 7.695449204 | 8.211511314 | 7.99064276  | 8.237591152 | 8.416617244 | 7.45062181  | 7.565700253 | 8.37273147  | 8.187148793 | 8.152302882 | 7.689698954 |
| GLTSR12  | 7.638211257 | 8.452321165  | 8.905590541 | 8.24912073   | 7.91520934  | 8.07317521  | 7.689580196 | 7.525296174 | 8.45008567  | 8.7708265   | 8.12048612  | 8.23470155  | 8.14433011  | 8.736354704 | 8.129857029 | 8.19632804  | 8.270844896 | 7.993708698 |
| ANKR1D   | 8.834189971 | 8.127157488  | 8.133540449 | 8.306874324  | 8.271364447 | 8.04562839  | 8.949096257 | 8.546216568 | 8.335976611 | 8.317667592 | 8.055636783 | 8.299656026 | 7.946747715 | 7.63729922  | 8.135113244 | 7.992373761 | 7.96382699  | 7.835741899 |
| MED21    | 8.08250664  | 8.0946521    | 8.68923908  | 8.072231284  | 8.249465027 | 8.9569195   | 7.793560217 | 8.013696451 | 8.498362407 | 7.902582622 | 8.157660985 | 8.869117866 | 8.726932617 | 7.958881489 | 8.217524663 | 8.189242366 | 8.02085941  | 7.846445467 |
| TAPT1    | 8.094968416 | 8.383514874  | 8.56849148  | 7.372320561  | 7.372320561 | 7.372320561 | 7.372320561 | 8.474015994 | 8.210166378 | 8.39292376  | 7.941236948 | 8.038250729 | 8.605852306 | 8.196138405 | 8.536187004 | 8.5571869   | 8.251708369 | 7.988476023 |
| RANBP9   | 8.305675983 | 7.97469898   | 8.115651113 | 9.128405561  | 7.63261465  | 8.627567279 | 8.637791717 | 8.220895728 | 8.054175291 | 8.125875822 | 8.456292919 | 8.018452835 | 8.899714063 | 8.520455033 | 8.189109387 | 8.030061223 | 8.06437218  | 7.904260778 |
| TMEN11   | 8.28334219  | 8.780389848  | 7.913306948 | 7.952632145  | 8.437421123 | 8.256140109 | 8.094136629 | 8.205687401 | 8.131287011 | 8.131650412 | 8.146885486 | 8.198450716 | 7.36967042  | 8.848097765 | 8.097234183 | 8.27158336  | 8.122616604 | 8.72154016  |
| STAR3DL  | 7.634513084 | 7.733290942  | 8.393391444 | 8.20398244   | 8.393391444 | 8.20398244  | 8.393391444 | 8.393391444 | 8.393391444 | 8.393391444 | 8.393391444 | 8.393391444 | 8.393391444 | 8.393391444 | 8.393391444 | 8.393391444 | 8.393391444 | 8.393391444 |
| CAD      | 8.28291756  | 8.120144983  | 7.69862717  | 8.86571424   | 8.517575996 | 8.090997429 | 8.437979756 | 8.211856136 | 8.1605285   | 8.1605285   | 8.738376396 | 8.189530881 | 6.34408593  | 8.11171188  | 8.526520166 | 8.327940193 | 8.685056402 | 8.788598631 |
| SETD4    | 8.620641416 | 9.233887305  | 8.595821465 | 7.848928834  | 8.426218468 | 7.976598406 | 7.559605367 | 7.714958156 | 8.530114216 | 7.863620396 | 7.739038839 | 8.631145697 | 9.33715944  | 6.896497025 | 7.73089167  | 8.202137957 | 8.198942914 | 8.503071311 |
| MRPL12   | 8.113068296 | 7.832438645  | 8.548699423 | 8.311909077  | 7.952269722 | 8.308111597 | 8.170680896 | 7.996015211 | 8.467884023 | 8.441838272 | 7.796015211 | 8.467884023 | 8.441838272 | 8.032017463 | 8.09425893  | 8.023519091 | 8.354003097 |             |
| PTER     | 8.276210303 | 7.866490609  | 8.800331344 | 8.378119439  | 8.204087768 | 8.303113397 | 8.482703536 | 8.482703536 | 8.235197536 | 8.191470342 | 8.312168441 | 8.470184329 | 7.486020215 | 8.311821666 | 7.97982959  | 7.950462099 | 8.193024565 | 8.078807947 |
| WRD20    | 7.719164039 | 7.596360418  | 7.766743949 | 8.310997459  | 7.866785899 | 7.989517225 | 8.339916676 | 8.124572742 | 8.824759095 | 8.259545066 | 8.131473208 | 8.366922225 | 8.209511019 | 7.940819801 | 8.151026764 | 8.331372617 | 8.322025866 | 7.845755432 |
| TRACP11  | 7.770037993 | 8.081676661  | 7.105899312 | 8.289977271  | 7.875718477 | 8.038482702 | 8.736885074 | 8.10568068  | 8.490135008 | 8.39464884  | 8.564731666 | 8.063621664 | 6.413155977 | 8.317109852 | 8.30572279  | 8.654367923 | 8.54452332  | 8.54452332  |
| SHAC3    | 8.28334219  | 8.780389848  | 7.913306948 | 7.952632145  | 8.437421123 | 8.256140109 | 8.094136629 | 8.205687401 | 8.131287011 | 8.131650412 | 8.146885486 | 8.198450716 | 7.36967042  | 8.848097765 | 8.097234183 | 8.27158336  | 8.122616604 | 8.72154016  |
| KPNAS    | 9.52395549  | 7.29892059   | 8.309060163 | 8.60252375   | 7.39757596  | 8.34043642  | 7.547351989 | 8.60412089  | 9.235601505 | 8.30489295  | 8.193695149 | 8.788136142 | 8.929044298 | 6.518739648 | 8.200179756 | 8.374019752 | 8.374019752 | 8.192350009 |
| IL7RA    | 8.498969078 | 7.944270004  | 7.61499415  | 6.976917327  | 8.38821181  | 7.410160212 | 8.682584147 | 8.119000481 | 8.299948191 | 7.532615159 | 8.282718035 | 8.265654279 | 8.52793616  | 8.302573491 | 8.403753828 | 8.06730801  | 7.36442075  | 8.126629642 |
| ELP6     | 8.728729166 | 8.212466906  | 8.122616606 | 7.97829166   | 8.165324454 | 8.504803803 | 8.165324454 | 8.735440472 | 8.303551622 | 8.05320847  | 8.178927786 | 7.731738277 | 8.507611013 | 8.324771073 | 7.743058388 | 8.265385622 | 8.123716046 | 8.32407019  |
| ANKRD27  | 8.094919757 | 9.26130877   | 6.62346602  | 8.059310359  | 7.900073451 | 8.174408593 | 8.412284764 | 8.342993317 | 7.917624466 | 8.070772913 | 8.155862416 | 8.162773086 | 8.04211611  | 8.887387555 | 8.689697321 | 8.602727024 | 8.316062427 | 8.15973287  |
| BLOC152  | 8.310394653 | 8.07530918   | 8.854161346 | 7.860871031  | 8.553931559 | 7.61537846  | 8.118813465 | 8.233563735 | 7.974070483 | 8.242414088 | 8.073710683 | 9.26795202  | 8.155316642 | 8.088355495 | 8.25531561  | 7.772002308 | 8.346103628 |             |
| MTR      | 8.772173798 | 8.885132833  | 8.703646334 | 7.783799951  | 8.742031422 | 7.997771718 | 7.990541738 | 8.344426978 | 8.126128678 | 8.595897105 | 7.986649134 | 7.964698816 | 8.193768441 | 6.880168807 | 8.293713198 | 8.740051621 | 8.919502685 | 8.241189985 |
| SHAC1D1  | 7.22277487  | 7.435290942  | 8.393391444 | 8.20398244   | 8.393391444 | 8.20398244  | 8.393391444 | 8.393391444 | 8.393391444 | 8.393391444 | 8.393391444 | 8.393391444 | 8.393391444 | 8.393391444 | 8.393391444 | 8.393391444 | 8.393391444 | 8.393391444 |
| UXB7     | 8.472215239 | 5.641688546  | 6.919655142 | 5.470212329  | 7.415768248 | 7.415768248 | 7.415768248 | 8.245619747 | 8.163174009 | 8.430764474 | 8.245619747 | 7.11175388  | 6.430764474 | 8.104965142 | 8.917757329 | 8.058665121 | 8.362458484 |             |
| SLC27A   | 8.098049001 | 8.552737399  | 8.304672124 | 8.546401353  | 8.170044618 | 8.572464552 | 8.544889244 | 7.82168105  | 8.782417182 | 8.12597554  | 8.64069237  | 7.603919467 | 8.215948352 | 7.901912142 | 6.80175862  | 8.03040033  | 8.273521    | 8.180205843 |
| CZF326   | 8.567375075 | 8.367554155  | 8.265801541 | 7.65545155   | 6.333869218 | 5.839437361 | 6.26425595  | 8.296775831 | 8.027728184 | 8.380593739 | 8.119974612 | 8.118802134 | 7.607538412 | 8.581096373 | 8.613459657 | 8.50367004  | 8.28163317  | 8.549119835 |
| ATRN     | 7.514680415 | 7.081642718  | 8.220218745 | 8.894158319  | 8.167460748 | 8.592781022 | 8.506891394 | 9.068472203 | 7.75233748  | 7.751064419 | 8.604081983 | 8.141668558 | 8.277648217 | 9.038113012 | 9.138082702 | 7.65329313  | 8.217751953 | 8.959636298 |
| TAJF     | 8.164564331 | 7.73474929   | 8.098758431 | 8.098758431  | 8.508285073 | 8.150871182 | 8.590395959 | 8.806576685 | 8.503788665 | 8.503788665 | 8.44479949  | 8.612825608 | 8.672197156 | 7.903473109 | 8.161799335 | 8.325996695 | 8.160210247 | 7.838700747 |
| CCZD1A   | 7.904847208 | 6.232584949  | 6.635500788 | 7.29807317   | 8.110205108 | 8.187079178 | 8.589115173 | 8.139742363 | 8.134690834 | 8.225806845 | 8.23014263  | 8.017195389 | 8.510025788 | 8.085671472 | 8.297170091 | 8.197218754 | 8.37428035  | 8.849427737 |
| LAMP5    | 8.081770738 | 8.635500788  | 8.180268985 | 6.629675256  | 5.440057005 | 8.224769653 | 8.191398492 | 8.247796653 | 8.014135167 | 8.454579871 | 8.187527926 | 8.159825828 | 8.15982     |             |             |             |             |             |

|            |             |             |             |             |             |             |             |             |             |             |             |             |             |             |             |             |             |             |
|------------|-------------|-------------|-------------|-------------|-------------|-------------|-------------|-------------|-------------|-------------|-------------|-------------|-------------|-------------|-------------|-------------|-------------|-------------|
| FAMS2B     | 8.087796351 | 8.218874262 | 8.415749129 | 8.307562671 | 8.610327606 | 7.963696016 | 8.365999358 | 8.259213634 | 8.797085888 | 7.620321833 | 8.115154043 | 8.586789063 | 7.797055257 | 7.420815733 | 7.845161997 | 8.383877507 | 7.98801033  | 8.053904625 |
| MY09B      | 7.901552322 | 7.204382586 | 8.409375511 | 7.605729899 | 8.167209966 | 8.033761991 | 8.166054085 | 8.774657888 | 7.7469284   | 8.373465907 | 8.25610447  | 8.064133457 | 8.024980694 | 8.75738898  | 8.951928063 | 8.189074721 | 8.702645893 | 8.547267632 |
| ACT9A      | 8.154052076 | 8.803793365 | 8.803793365 | 8.803793365 | 8.803793365 | 8.803793365 | 8.803793365 | 8.803793365 | 8.803793365 | 8.803793365 | 8.803793365 | 8.803793365 | 8.803793365 | 8.803793365 | 8.803793365 | 8.803793365 | 8.803793365 | 8.803793365 |
| SPIN2C     | 9.286159738 | 8.576302625 | 9.298163176 | 9.410588289 | 7.573401737 | 8.068796025 | 8.447363972 | 6.659274065 | 8.685566652 | 6.097691234 | 6.932342735 | 7.897856677 | 8.262212646 | 9.214126018 | 6.683360693 | 8.865942883 | 7.185291299 | 9.201246699 |
| MTM10B     | 7.673966436 | 7.641016252 | 8.633436056 | 8.154077006 | 7.092317363 | 8.154077006 | 8.154077006 | 8.154077006 | 8.154077006 | 8.154077006 | 8.154077006 | 8.154077006 | 8.154077006 | 8.154077006 | 8.154077006 | 8.154077006 | 8.154077006 | 8.154077006 |
| SC39A11    | 7.552637864 | 8.342445368 | 8.342445368 | 8.342445368 | 8.342445368 | 8.342445368 | 8.342445368 | 8.342445368 | 8.342445368 | 8.342445368 | 8.342445368 | 8.342445368 | 8.342445368 | 8.342445368 | 8.342445368 | 8.342445368 | 8.342445368 | 8.342445368 |
| ARHF2E     | 8.167378113 | 8.37990142  | 8.082986035 | 8.265699964 | 9.250737562 | 7.834072204 | 8.274635594 | 8.303324762 | 8.717563363 | 8.156292265 | 8.240219187 | 9.738411229 | 8.484698319 | 8.242087529 | 9.933408375 | 8.077019871 | 8.105205451 | 8.741753736 |
| SIGIR      | 8.269573881 | 8.493338381 | 8.249116901 | 8.182119669 | 8.795711352 | 8.175025262 | 8.374863321 | 8.789058879 | 8.098546099 | 7.993303342 | 8.156400559 | 8.102660627 | 8.175514663 | 7.967721528 | 7.682884962 | 7.892219042 | 8.014940286 | 8.183104013 |
| RWDD2B     | 8.866084659 | 7.93530944  | 8.163816696 | 8.33417431  | 8.455183603 | 8.937095533 | 8.620314788 | 7.680775575 | 8.295100472 | 7.866113682 | 7.762319179 | 8.656602629 | 8.149735727 | 7.757082278 | 8.734536683 | 8.360708314 | 7.897561020 | 8.162797772 |
| UTP14C     | 6.529709456 | 8.187280254 | 6.529709456 | 6.529709456 | 6.529709456 | 6.529709456 | 6.529709456 | 6.529709456 | 6.529709456 | 6.529709456 | 6.529709456 | 6.529709456 | 6.529709456 | 6.529709456 | 6.529709456 | 6.529709456 | 6.529709456 | 6.529709456 |
| GAMC       | 7.964002076 | 8.439392617 | 8.22989168  | 8.22989168  | 8.22989168  | 8.22989168  | 8.22989168  | 8.22989168  | 8.22989168  | 8.22989168  | 8.22989168  | 8.22989168  | 8.22989168  | 8.22989168  | 8.22989168  | 8.22989168  | 8.22989168  | 8.22989168  |
| RC2T       | 8.211080817 | 8.67702064  | 8.092805603 | 8.809482306 | 8.148265285 | 7.580528497 | 8.379534732 | 7.8003738   | 8.111035818 | 8.106343181 | 8.076493181 | 8.578781072 | 8.529304202 | 8.797772012 | 8.153662218 | 7.750596682 | 8.901904873 | 8.17117752  |
| BE5        | 6.658022666 | 6.50052572  | 8.697706366 | 7.20180345  | 9.339618884 | 8.691943089 | 8.31281401  | 9.825247286 | 8.62599807  | 6.92161104  | 8.032972204 | 9.709815234 | 8.005805825 | 5.902740088 | 5.939520805 | 8.301748445 |             |             |
| BLOC1S1    | 8.318588223 | 8.189526595 | 8.471711586 | 8.196798614 | 8.116451408 | 8.511845056 | 8.142645594 | 8.173829725 | 8.164526061 | 8.15967479  | 8.084929889 | 8.27680435  | 8.145749999 | 7.853046252 | 9.737237308 | 7.841286632 | 8.035536852 | 8.296056376 |
| RAD1       | 8.195866933 | 7.9856673   | 8.173275341 | 8.508437414 | 7.93644451  | 7.954828123 | 8.239091227 | 8.056846276 | 8.456124002 | 7.990597763 | 8.077089797 | 7.914538264 | 8.21397419  | 7.94668301  | 8.36642746  | 8.784472696 | 8.150090672 | 8.14500337  |
| CK2PA1     | 8.140229744 | 8.022753746 | 7.805056481 | 8.182275348 | 8.431261733 | 8.324698923 | 7.7742398   | 8.070615924 | 7.75319361  | 7.443697841 | 8.335062187 | 8.038618018 | 8.462076775 | 8.058625289 | 8.246829686 | 7.328228846 | 7.535267899 | 8.391223378 |
| RSRC1      | 8.787409857 | 7.365537002 | 7.93039888  | 7.664477649 | 8.600746739 | 8.512463667 | 7.820809551 | 8.172492434 | 8.150192769 | 8.143197937 | 8.460671524 | 8.149753544 | 8.479735208 | 8.26493722  | 8.285784062 | 8.547919694 | 8.121301945 |             |
| MRP9       | 8.258862894 | 8.307263556 | 8.22894679  | 8.308534535 | 8.36465792  | 8.72551902  | 8.325405644 | 7.68506446  | 8.390837703 | 7.948788225 | 8.012680306 | 8.360632236 | 8.099091887 | 8.66818449  | 7.711342656 | 8.078322529 | 7.872188133 | 7.909892919 |
| ZMF5A      | 8.154419881 | 8.03031741  | 8.280473715 | 7.534274224 | 7.345647903 | 8.712621058 | 8.235698837 | 8.366672817 | 8.370627897 | 7.606631668 | 7.735979037 | 7.175961863 | 8.585671746 | 7.966028824 | 8.336837573 | 8.089181087 | 8.166296333 | 8.192290879 |
| FAM12ZA    | 8.186807888 | 8.739985511 | 7.883152568 | 9.052214349 | 8.753577253 | 8.393977233 | 8.096640074 | 8.417073443 | 7.991694661 | 8.162826776 | 8.240025674 | 7.08344258  | 8.134070095 | 7.965116097 | 8.086714847 | 8.075058889 | 7.187768146 | 8.037744377 |
| AB09       | 7.682390585 | 7.947810587 | 8.881294889 | 8.260973838 | 8.680267975 | 8.459609387 | 8.02510725  | 8.201861384 | 7.884862396 | 8.057592167 | 8.08575594  | 8.01785963  | 8.022140062 | 8.386583957 | 8.327355901 | 8.26272717  | 9.005533374 | 8.511425442 |
| TRWCA      | 8.421946648 | 8.299116328 | 8.336779294 | 8.11981292  | 8.782578714 | 8.503735503 | 7.892602084 | 8.087081327 | 8.057575394 | 8.01785963  | 8.022140062 | 8.386583957 | 8.327355901 | 8.26272717  | 9.005533374 | 8.511425442 |             |             |
| ERL1N2     | 8.215372683 | 8.532239899 | 8.210873914 | 7.871728143 | 8.062662972 | 9.030667731 | 8.203141937 | 8.16703057  | 8.152144031 | 7.969292536 | 8.392457699 | 7.728333824 | 8.884714966 | 6.879446529 | 7.451526275 | 8.482684776 | 7.695443536 | 7.899667774 |
| VASP       | 8.406403282 | 8.238541378 | 8.277097315 | 8.446403948 | 8.073076085 | 8.541491607 | 8.727458939 | 8.105243494 | 8.13615342  | 8.05243494  | 8.180144581 | 8.097188019 | 8.214247211 | 7.941846735 | 8.055255568 | 8.097233006 | 8.251121282 |             |
| EZH1       | 8.03727181  | 8.264750303 | 7.189189494 | 8.284369415 | 8.099578669 | 8.126254736 | 7.98620622  | 7.138224554 | 7.9687313   | 8.446839513 | 7.932458049 | 8.933311467 | 7.006926321 | 6.684601125 | 8.287703421 | 8.177193506 | 8.507441797 | 8.599478456 |
| LRIG2      | 8.193764264 | 6.967198632 | 7.91478632  | 6.967198632 | 6.967198632 | 6.967198632 | 6.967198632 | 6.967198632 | 6.967198632 | 6.967198632 | 6.967198632 | 6.967198632 | 6.967198632 | 6.967198632 | 6.967198632 | 6.967198632 | 6.967198632 | 6.967198632 |
| RNF2       | 7.921822643 | 7.660845883 | 7.711597769 | 8.162377727 | 6.85410622  | 8.186295754 | 8.254124138 | 7.79061408  | 8.154653113 | 7.800759435 | 8.166353061 | 9.19139624  | 8.15952142  | 8.91429196  | 8.300938448 | 8.171024642 | 7.603126637 | 8.193830178 |
| MTM10B     | 7.673966436 | 7.641016252 | 8.633436056 | 8.154077006 | 7.092317363 | 8.154077006 | 8.154077006 | 8.154077006 | 8.154077006 | 8.154077006 | 8.154077006 | 8.154077006 | 8.154077006 | 8.154077006 | 8.154077006 | 8.154077006 | 8.154077006 | 8.154077006 |
| ZNF548     | 8.395562545 | 8.799562545 | 8.799562545 | 8.799562545 | 8.799562545 | 8.799562545 | 8.799562545 | 8.799562545 | 8.799562545 | 8.799562545 | 8.799562545 | 8.799562545 | 8.799562545 | 8.799562545 | 8.799562545 | 8.799562545 | 8.799562545 | 8.799562545 |
| C19orf12   | 7.953029505 | 7.877031555 | 7.591491959 | 7.862942363 | 7.707147743 | 8.444235826 | 7.72411484  | 8.388955471 | 8.329951772 | 8.424206154 | 8.103138776 | 8.084343468 | 7.599165807 | 8.902511385 | 8.34827719  | 8.243837324 | 8.429890908 | 8.102146186 |
| FXB04      | 8.806401058 | 8.273620887 | 8.659598181 | 8.226357933 | 7.778121987 | 7.792673178 | 7.778121987 | 8.522192976 | 8.262025584 | 7.88322937  | 8.47697084  | 8.132650434 | 8.689881283 | 7.877832642 | 8.180923924 | 8.426235948 | 7.842633508 | 7.72174196  |
| CSorf22    | 8.324984066 | 8.000997367 | 9.154507987 | 8.202271647 | 8.110563885 | 8.412712270 | 7.820998033 | 7.75408525  | 8.28239112  | 7.748007625 | 8.486298429 | 9.253718272 | 8.445736177 | 7.792399211 | 8.064511932 | 7.792314522 | 8.380102692 | 7.84846176  |
| CN3        | 7.896723264 | 8.39812452  | 8.39812452  | 8.39812452  | 8.39812452  | 8.39812452  | 8.39812452  | 8.39812452  | 8.39812452  | 8.39812452  | 8.39812452  | 8.39812452  | 8.39812452  | 8.39812452  | 8.39812452  | 8.39812452  | 8.39812452  | 8.39812452  |
| SLC16A     | 7.725100567 | 8.613544566 | 6.498962229 | 6.498962229 | 6.498962229 | 6.498962229 | 6.498962229 | 6.498962229 | 6.498962229 | 6.498962229 | 6.498962229 | 6.498962229 | 6.498962229 | 6.498962229 | 6.498962229 | 6.498962229 | 6.498962229 | 6.498962229 |
| CDX10      | 8.480326899 | 8.480326899 | 8.480326899 | 8.480326899 | 8.480326899 | 8.480326899 | 8.480326899 | 8.480326899 | 8.480326899 | 8.480326899 | 8.480326899 | 8.480326899 | 8.480326899 | 8.480326899 | 8.480326899 | 8.480326899 | 8.480326899 | 8.480326899 |
| NSU6A      | 7.997477488 | 8.947740056 | 8.687102923 | 8.687102923 | 8.687102923 | 8.687102923 | 8.687102923 | 8.687102923 | 8.687102923 | 8.687102923 | 8.687102923 | 8.687102923 | 8.687102923 | 8.687102923 | 8.687102923 | 8.687102923 | 8.687102923 | 8.687102923 |
| ANKK1D-E1F | 8.469840315 | 9.17987381  | 9.017380133 | 8.302800664 | 7.064215819 | 8.319640085 | 7.28535687  | 8.132541482 | 8.028611053 | 8.174184859 | 8.203210831 | 8.339944062 | 8.963383725 | 7.683466053 | 7.960455437 | 8.264114568 | 7.911727256 | 7.681946821 |
| RHN01      | 8.456302035 | 8.570549786 | 8.472695002 | 8.838567559 | 7.12365377  | 6.587866449 | 8.322835348 | 7.965223214 | 8.016319908 | 8.038503382 | 7.834734612 | 7.819597708 | 8.27948337  | 8.154566977 | 7.64282141  | 8.214328364 | 8.152119056 | 8.105394232 |
| ASS1       | 9.25628972  | 8.06499736  | 9.1531628   | 8.694584718 | 9.000559303 | 8.082976025 | 7.88300088  | 8.417505497 | 8.497120865 | 7.410299098 | 8.486459803 | 7.599182012 | 7.249349083 | 8.22118331  | 7.297607016 | 7.795764342 | 7.131231401 | 8.524461848 |
| DVLL       | 8.153513193 | 8.369914999 | 8.369914999 | 8.369914999 | 8.369914999 | 8.369914999 | 8.369914999 | 8.369914999 | 8.369914999 | 8.369914999 | 8.369914999 | 8.369914999 | 8.369914999 | 8.369914999 | 8.369914999 | 8.369914999 | 8.369914999 | 8.369914999 |
| RC0R3      | 8.065703771 | 8.31794102  | 8.509195969 | 7.622855794 | 7.035268447 | 6.918685623 | 8.370026020 | 7.166604273 | 7.681037066 | 8.34076208  | 7.98718983  | 8.103835419 | 7.010390324 | 8.218301126 | 8.242866552 | 8.328699178 | 8.178117051 | 8.416702727 |
| CDCA47     | 8.043638477 | 8.200399614 | 6.473995655 | 6.888644849 | 8.174302841 | 8.174827077 | 8.70570999  | 8.625925014 | 8.19534612  | 8.157174461 |             |             |             |             |             |             |             |             |



|         |             |             |             |             |             |             |              |              |              |              |              |              |              |              |              |              |              |              |
|---------|-------------|-------------|-------------|-------------|-------------|-------------|--------------|--------------|--------------|--------------|--------------|--------------|--------------|--------------|--------------|--------------|--------------|--------------|
| MUM1    | 7.96113799  | 8.779898391 | 8.508881942 | 8.73076577  | 7.795439343 | 7.528492665 | 7.597092924  | 8.300545967  | 7.818371059  | 8.35444617   | 7.956033787  | 8.043156921  | 8.222684555  | 9.387986763  | 8.315698911  | 8.014315017  | 8.350986949  | 7.837796263  |
| WDR9    | 8.790298987 | 8.927638452 | 8.129632107 | 8.575459858 | 7.428357034 | 6.189642132 | 7.982966631  | 8.324544416  | 7.490464407  | 8.219073207  | 7.309745373  | 7.090444516  | 7.979677974  | 6.25832626   | 6.258724855  | 8.468111687  | 8.971960701  | 8.135438483  |
| MTR     | 7.619376217 | 6.691802894 | 7.35892807  | 8.042048179 | 6.93087842  | 8.607962097 | 7.490153056  | 8.164725651  | 7.520542081  | 8.852817208  | 8.157815765  | 8.100245438  | 6.192999992  | 8.329074651  | 8.192765972  | 8.393953723  | 8.19694515   | 8.179257873  |
| NLL1    | 8.13120765  | 8.201576571 | 8.373551996 | 8.168087236 | 8.790688779 | 8.580696828 | 7.860723547  | 8.29997112   | 8.132173178  | 7.758521594  | 8.182592013  | 8.341085059  | 7.96418314   | 8.422482683  | 7.726090554  | 8.132250771  | 7.93431583   | 7.649307561  |
| NCA1    | 7.440956744 | 8.433952276 | 8.385022346 | 8.439892375 | 7.63392527  | 8.469152799 | 8.20931242   | 8.344538441  | 8.344538441  | 7.941330938  | 8.78111632   | 7.973024598  | 6.80277237   | 8.154715519  | 8.146279794  | 8.07240767   | 7.916086992  | 7.39987876   |
| B3GAL16 | 8.225409175 | 8.302070795 | 8.509720055 | 8.790924474 | 7.890697554 | 7.681187256 | 8.099112893  | 8.087232052  | 8.08277788   | 8.182592013  | 8.182592013  | 8.182592013  | 8.182592013  | 8.182592013  | 8.182592013  | 8.182592013  | 8.182592013  | 8.182592013  |
| ZNF7    | 8.02188134  | 8.358446771 | 8.618843406 | 8.587549711 | 8.412726560 | 8.737287384 | 8.51031869   | 8.099886040  | 8.060900531  | 8.194753678  | 7.880693264  | 7.815148716  | 7.64915468   | 8.412063408  | 8.079261096  | 8.159097443  | 8.434420440  | 8.256038607  |
| PCN3    | 8.44753244  | 8.786412673 | 8.187157519 | 8.107395019 | 8.152306996 | 8.86191795  | 8.334429685  | 8.312095904  | 8.312095904  | 8.32574641   | 7.588239222  | 7.682602698  | 7.569661534  | 8.417860037  | 8.097528488  | 8.534388732  | 8.177996373  |              |
| CKR3    | 7.640693203 | 8.089455288 | 7.725973375 | 7.648050333 | 8.205739946 | 8.176417756 | 8.082842433  | 7.780494106  | 7.72453724   | 8.931685379  | 7.946754553  | 8.809410371  | 8.804270801  | 8.329359504  | 8.597691471  | 8.171266199  | 8.843529321  | 8.638852875  |
| SLC46A1 | 8.436052492 | 8.884641708 | 8.799546032 | 8.544875118 | 8.476234238 | 8.131037921 | 8.104506661  | 8.352206349  | 8.046666114  | 8.312696652  | 8.551413701  | 7.569906267  | 8.059975723  | 7.925477719  | 8.660302869  | 8.718405155  | 8.196963137  | 8.250685497  |
| WDR3    | 8.488982946 | 8.049406392 | 8.584875118 | 8.039623006 | 8.404513648 | 8.71477711  | 8.598602259  | 7.064944441  | 8.368482444  | 8.806741194  | 7.7262626    | 8.199898988  | 7.965525266  | 7.933444444  | 5.933050311  | 8.300715736  | 8.314891098  | 8.23902352   |
| USF1    | 8.05746133  | 8.134668965 | 8.456689665 | 8.456689665 | 8.456689665 | 8.456689665 | 8.456689665  | 8.456689665  | 8.456689665  | 8.456689665  | 8.456689665  | 8.456689665  | 8.456689665  | 8.456689665  | 8.456689665  | 8.456689665  | 8.456689665  | 8.456689665  |
| ATP     | 8.042086771 | 7.466689665 | 8.359043226 | 7.047789449 | 7.047789449 | 7.047789449 | 7.047789449  | 7.047789449  | 7.047789449  | 7.047789449  | 7.047789449  | 7.047789449  | 7.047789449  | 7.047789449  | 7.047789449  | 7.047789449  | 7.047789449  | 7.047789449  |
| ASXL2   | 7.732648433 | 7.548841501 | 8.025021802 | 8.734175782 | 8.695953077 | 8.067531852 | 8.508367747  | 8.401438083  | 8.188740277  | 8.425291624  | 8.492624564  | 7.970007553  | 7.504603087  | 7.56543947   | 8.245246195  | 8.20935679   | 8.672754901  | 7.710295848  |
| CAAP1   | 7.924887344 | 7.122913049 | 8.189343756 | 8.400829654 | 8.674235007 | 8.123450547 | 8.950845368  | 8.412906858  | 8.412906858  | 8.46247894   | 8.167670671  | 8.018380021  | 8.324242883  | 7.819729285  | 7.9041535    | 7.921355313  | 7.915194539  | 8.480494267  |
| KLF11   | 8.54431255  | 8.869689933 | 7.908421896 | 8.510066373 | 7.696712387 | 7.519094695 | 6.299155695  | 8.589974132  | 8.484105375  | 7.951902876  | 8.638478251  | 7.732935658  | 7.043303327  | 8.280508771  | 8.560567889  | 8.27236849   | 7.981619575  | 7.824154867  |
| MTRM3   | 7.939167985 | 8.53199004  | 7.797928141 | 7.939167985 | 7.797928141 | 7.939167985 | 7.797928141  | 7.939167985  | 7.797928141  | 7.939167985  | 7.797928141  | 7.939167985  | 7.797928141  | 7.939167985  | 7.797928141  | 7.939167985  | 7.797928141  | 7.939167985  |
| CAB_2   | 8.281584204 | 8.615628661 | 7.161338969 | 7.829086625 | 7.947637899 | 8.366595934 | 7.832060394  | 7.970348666  | 9.039119738  | 7.611041382  | 8.777989883  | 8.356541125  | 7.944003023  | 8.286552729  | 7.834485406  | 9.243160277  | 7.535919269  | 8.75792869   |
| RB28    | 7.514947222 | 7.56713894  | 8.517723168 | 8.770694638 | 7.881728464 | 8.356595499 | 7.784093096  | 7.847912389  | 7.784093096  | 8.785292168  | 8.78669481   | 8.686451474  | 8.165908396  | 8.466713851  | 7.889034879  | 8.403170304  | 8.7899424    |              |
| HMT3    | 8.081261210 | 8.093076724 | 8.266605072 | 8.019192410 | 8.781037739 | 8.165970007 | 8.53370792   | 8.329274004  | 8.136876162  | 7.74263564   | 7.680570747  | 8.489190796  | 6.143128807  | 8.093176131  | 8.113295809  | 8.272499663  | 8.20786213   | 8.682474629  |
| NPTM    | 8.766076841 | 7.731545222 | 8.646007488 | 8.400458922 | 7.890353385 | 8.060168778 | 8.055083247  | 8.733969327  | 8.733969327  | 8.181411742  | 8.266213005  | 7.847532323  | 8.920113906  | 8.047162132  | 8.06579699   | 8.017789815  | 9.03517901   |              |
| DALR3   | 7.906870719 | 8.059579964 | 8.315661274 | 8.385942067 | 4.846557739 | 7.961459363 | 8.004582198  | 8.671517597  | 8.038178729  | 9.292395486  | 8.326678841  | 7.919363843  | 8.075773425  | 6.290526756  | 8.26146142   | 7.852724097  | 8.752524097  |              |
| R3HC11  | 8.139113639 | 8.55747449  | 7.983073643 | 7.395900852 | 7.67576731  | 7.717009407 | 8.449490919  | 7.829011546  | 8.395346046  | 7.888172806  | 8.191517907  | 8.22031242   | 8.43583971   | 7.465091347  | 8.260018886  | 8.044325117  | 8.183917988  | 8.107021002  |
| RP38    | 8.535801609 | 8.950126189 | 8.468180744 | 8.014839754 | 8.332674375 | 8.188002205 | 8.1095484236 | 8.1095484236 | 8.1095484236 | 8.1095484236 | 8.1095484236 | 8.1095484236 | 8.1095484236 | 8.1095484236 | 8.1095484236 | 8.1095484236 | 8.1095484236 | 8.1095484236 |
| HMGCL   | 8.598241237 | 8.408487094 | 8.498663505 | 8.498663505 | 8.498663505 | 8.498663505 | 8.498663505  | 8.498663505  | 8.498663505  | 8.498663505  | 8.498663505  | 8.498663505  | 8.498663505  | 8.498663505  | 8.498663505  | 8.498663505  | 8.498663505  | 8.498663505  |
| ZMAT2   | 7.78650222  | 8.058818227 | 8.209680828 | 7.96013708  | 8.341523586 | 8.107678371 | 8.336600808  | 8.002340198  | 8.328754791  | 8.07665594   | 8.161823658  | 8.546597063  | 8.469783764  | 8.819447002  | 7.815770918  | 8.125308522  | 8.786795472  | 8.189466511  |
| FAAH    | 8.024517284 | 6.831691284 | 8.564166581 | 8.566293432 | 7.19144468  | 7.950738499 | 8.789728255  | 8.7946111    | 7.981285439  | 8.25444655   | 8.174791911  | 7.485839514  | 8.396846026  | 7.754923181  | 9.074402895  | 7.554112026  | 8.126651644  | 8.120674772  |
| NCA1    | 8.300715501 | 8.400715501 | 8.300715501 | 8.300715501 | 8.300715501 | 8.300715501 | 8.300715501  | 8.300715501  | 8.300715501  | 8.300715501  | 8.300715501  | 8.300715501  | 8.300715501  | 8.300715501  | 8.300715501  | 8.300715501  | 8.300715501  | 8.300715501  |
| SEC2C   | 8.045715101 | 7.789653866 | 8.318901678 | 8.318901678 | 8.318901678 | 8.318901678 | 8.318901678  | 8.318901678  | 8.318901678  | 8.318901678  | 8.318901678  | 8.318901678  | 8.318901678  | 8.318901678  | 8.318901678  | 8.318901678  | 8.318901678  | 8.318901678  |
| MMAB    | 8.458014589 | 7.193049589 | 8.484312304 | 8.204105069 | 8.551429053 | 8.229264664 | 7.560303667  | 7.778653732  | 8.249391964  | 7.64871308   | 8.150514422  | 8.311250879  | 7.72150879   | 6.579212432  | 7.706076222  | 5.77737512   | 8.28634319   | 8.091740994  |
| RNMT    | 8.160492772 | 8.253259177 | 8.68943275  | 7.88670231  | 6.313532245 | 8.042240906 | 8.09002298   | 7.726711109  | 8.095731683  | 8.134425869  | 8.095731683  | 8.134425869  | 8.095731683  | 8.134425869  | 8.095731683  | 8.134425869  | 8.095731683  | 8.134425869  |
| TIMP2   | 8.214657022 | 8.835747193 | 8.296860588 | 8.68421696  | 8.02376597  | 7.65007302  | 8.3881149    | 8.438266314  | 8.464554935  | 8.563670133  | 8.073513302  | 9.64343285   | 8.001380878  | 7.763450545  | 8.166305869  | 7.980274666  | 7.75125913   |              |
| VHL     | 7.48756222  | 8.486544882 | 8.165651046 | 7.726091122 | 8.138905616 | 8.138905616 | 8.138905616  | 8.138905616  | 8.138905616  | 8.138905616  | 8.138905616  | 8.138905616  | 8.138905616  | 8.138905616  | 8.138905616  | 8.138905616  | 8.138905616  | 8.138905616  |
| SEMA8B  | 7.962502787 | 7.967883741 | 8.849097154 | 7.095959391 | 8.036322547 | 7.728493353 | 8.388849587  | 8.120771322  | 8.583175451  | 8.275866694  | 8.023568669  | 8.292610078  | 8.0563732    | 8.839924449  | 8.113971128  | 8.740259329  | 8.055793258  | 9.2516988    |
| FAN1    | 6.432954098 | 8.503294989 | 8.194009797 | 6.533788997 | 6.533788997 | 6.533788997 | 6.533788997  | 6.533788997  | 6.533788997  | 6.533788997  | 6.533788997  | 6.533788997  | 6.533788997  | 6.533788997  | 6.533788997  | 6.533788997  | 6.533788997  | 6.533788997  |
| EPN1    | 8.392656508 | 8.423973722 | 8.789654487 | 8.789654487 | 8.789654487 | 8.789654487 | 8.789654487  | 8.789654487  | 8.789654487  | 8.789654487  | 8.789654487  | 8.789654487  | 8.789654487  | 8.789654487  | 8.789654487  | 8.789654487  | 8.789654487  | 8.789654487  |
| PARP9   | 8.422607443 | 7.666185237 | 5.899356068 | 8.013325841 | 8.188200109 | 8.19440674  | 8.148523307  | 8.4074312    | 8.015014218  | 8.379673601  | 8.329794236  | 8.083591765  | 7.428127461  | 7.87171504   | 8.617108146  | 7.899066963  | 8.537469469  | 8.4003087    |
| PIG3    | 8.137418811 | 7.827281798 | 7.834742791 | 8.172881078 | 8.094106048 | 8.398366066 | 8.490301334  | 8.384913053  | 8.625110862  | 8.069661133  | 8.314321779  | 7.697596038  | 6.95871934   | 7.078582529  | 7.985325117  | 8.236538443  | 8.354813743  | 8.16651192   |
| WDR3    | 7.567899284 | 8.888519838 | 7.913788664 | 7.714041829 | 8.996713228 | 8.966275918 | 8.473026667  | 7.731179991  | 8.292864614  | 8.152512271  | 8.078446344  | 8.583435552  | 5.670564321  | 6.794916524  | 7.174465544  | 8.194301699  | 7.982147411  | 8.124990337  |
| ZBT4A   | 6.638027235 | 7.958438428 | 8.224183273 | 7.590808001 | 9.036308888 | 8.401740536 | 8.191879777  | 8.131493653  | 8.191879777  | 8.131493653  | 8.191879777  | 8.131493653  | 8.191879777  | 8.131493653  | 8.191879777  | 8.131493653  | 8.191879777  | 8.131493653  |
| PEK6    | 5.717342288 | 8.864927019 | 8.018991861 | 8.079280997 | 8.275036277 | 7.635417048 | 7.005167647  | 7.666041095  | 8.371975264  | 8.301979639  | 7.962360914  | 7.582488171  | 6.012498017  | 8.626292924  | 7.846294067  | 8.339790684  | 8.402004241  | 7.747560721  |
| RHBDD3  | 8.481396754 | 8.503155883 | 7.112418387 | 7.946167019 | 8.428028621 | 8.049653079 | 8.086525127  | 8.340664194  | 7.92844115   |              |              |              |              |              |              |              |              |              |



|            |             |             |             |              |              |             |              |             |             |             |             |             |             |             |             |             |             |             |
|------------|-------------|-------------|-------------|--------------|--------------|-------------|--------------|-------------|-------------|-------------|-------------|-------------|-------------|-------------|-------------|-------------|-------------|-------------|
| DVL2       | 8.075057084 | 8.260129554 | 8.675227225 | 8.011796849  | 8.056671955  | 7.484219919 | 8.00411127   | 8.037329071 | 8.26805116  | 7.893993786 | 7.935289175 | 8.605790197 | 8.185746715 | 8.350697863 | 7.959419544 | 8.193633233 | 8.054000902 | 7.714601517 |
| TADT01     | 8.259137644 | 8.515624311 | 8.068951629 | 8.89498619   | 8.24136717   | 8.270481105 | 7.723487344  | 7.387521133 | 8.232981246 | 7.95273401  | 8.04124528  | 8.168913031 | 7.596880115 | 8.143361466 | 7.429677407 | 8.234637891 | 8.023425294 | 7.959583161 |
| DFFA       | 8.539045749 | 8.510345749 | 8.024664429 | 8.963175117  | 8.7047461821 | 7.551910891 | 8.932329034  | 7.953118005 | 8.167174684 | 8.062279762 | 8.364194329 | 8.641191073 | 8.12575136  | 8.082720146 | 7.6334003   | 8.148389077 | 8.37172459  | 7.906649207 |
| RF1        | 8.37677864  | 7.761700497 | 7.084387    | 7.09663881   | 7.414128787  | 8.17774348  | 8.649456164  | 8.323953264 | 8.243458008 | 8.236504076 | 8.019022321 | 7.659564266 | 8.087819446 | 7.704643188 | 8.163448819 | 8.102422161 | 7.866405299 | 8.461137955 |
| ZNF24      | 8.297928374 | 8.252676    | 8.252676    | 8.297928374  | 8.11364105   | 7.84140005  | 7.80476629   | 8.305736179 | 8.19031915  | 8.09019115  | 7.719175149 | 7.69240657  | 6.7271227   | 8.2329949   | 8.760709471 | 8.760709471 | 7.995295414 | 8.693044088 |
| TS5E4      | 7.717454312 | 8.150004772 | 8.150004772 | 8.150004772  | 8.622118415  | 8.452402848 | 7.950126292  | 8.047829279 | 8.026277178 | 7.824285911 | 8.196056877 | 7.885136963 | 8.157655522 | 7.962770461 | 8.058234191 | 8.036433894 | 8.263131984 | 8.279345454 |
| ZNF26      | 8.566672088 | 7.952691633 | 8.566499224 | 8.269713916  | 8.1640485    | 8.205436104 | 8.311525345  | 8.066795317 | 7.750126643 | 7.832271883 | 7.582720659 | 7.951624854 | 8.038114219 | 8.138629464 | 8.133149667 | 7.962967434 | 7.629189283 | 7.408555557 |
| NIFK       | 8.140674449 | 8.365410355 | 8.436186643 | 8.465113015  | 7.779473559  | 7.691253118 | 8.118906499  | 7.44531799  | 7.82446326  | 7.766850449 | 7.50771001  | 8.180139825 | 8.338825182 | 8.671968211 | 7.37676789  | 7.755302083 | 7.78142182  | 7.93651594  |
| HCCS       | 7.882384643 | 7.455195666 | 8.17337374  | 7.788336619  | 7.10925321   | 6.947679752 | 8.201710244  | 8.288883099 | 7.968615014 | 8.061282841 | 8.20197902  | 8.676923784 | 7.992635499 | 8.68761044  | 7.463296494 | 8.097625476 | 8.041951377 | 8.857132398 |
| UOCC1      | 6.624748823 | 7.658648209 | 7.914180971 | 8.115157528  | 7.914931332  | 7.580298537 | 8.571821374  | 7.998402568 | 7.880216682 | 8.226202254 | 7.75775126  | 8.136133583 | 8.050786316 | 8.612482505 | 8.051150395 | 8.13483015  | 8.041295948 | 8.352139731 |
| PVM1       | 8.981510413 | 8.158257747 | 8.48331551  | 8.033505786  | 8.48331551   | 8.033505786 | 8.30593791   | 7.426572252 | 8.068160357 | 7.649597636 | 6.759952852 | 7.7075358   | 7.515386292 | 8.267950039 | 7.484281303 | 8.080788296 | 7.559250175 | 7.882575787 |
| NAT10      | 7.70439898  | 8.45714641  | 8.79066761  | 8.10423212   | 8.879287663  | 7.43314032  | 8.064529132  | 8.246951374 | 8.178719507 | 8.068827218 | 8.599242594 | 7.102091042 | 8.334230523 | 7.328283258 | 7.994567862 | 7.799104697 | 8.036842116 | 8.002320214 |
| CI10F6     | 8.06499986  | 8.359476267 | 8.402192928 | 8.300397478  | 8.584014974  | 8.35901794  | 7.823510502  | 7.863093359 | 7.946182768 | 8.557741878 | 8.613925714 | 8.105515755 | 7.553940274 | 7.718824369 | 7.765316178 | 7.655615    |             |             |
| IPK1       | 8.682139398 | 8.030255667 | 8.906192184 | 8.363206871  | 8.162266671  | 7.236979112 | 8.246646105  | 7.79312998  | 8.089019885 | 7.882361127 | 8.067447478 | 8.238690767 | 7.674578718 | 8.584951515 | 7.582064852 | 7.997552044 | 7.869500366 | 8.262031559 |
| ATPI       | 7.781859349 | 8.109590021 | 8.146224802 | 8.29580562   | 8.314730205  | 8.6471162   | 8.298933411  | 7.652020193 | 8.068412077 | 8.183166626 | 8.095387523 | 7.827864199 | 8.170659314 | 7.30312029  | 8.028597033 | 7.67596303  | 7.654264122 | 8.614738621 |
| ZCCH8      | 7.463142497 | 8.001267571 | 7.762254016 | 8.007813087  | 8.51087768   | 8.074106225 | 6.385365174  | 8.050588849 | 7.659848916 | 8.10302994  | 7.589407738 | 8.203236351 | 8.930768836 | 7.327114874 | 8.21178945  | 8.043888492 | 8.356707357 | 8.600531563 |
| BRD9       | 7.632540263 | 7.113963346 | 8.435615042 | 8.046249912  | 8.046249912  | 8.046249912 | 8.046249912  | 8.4629154   | 8.244048396 | 8.013217396 | 8.084169332 | 8.367109733 | 8.097086505 | 8.384569023 | 7.635087292 | 7.895320344 | 8.028434334 | 8.048719174 |
| CNNM2      | 7.956702177 | 8.017709985 | 8.068676043 | 7.530073713  | 8.272277928  | 8.29912026  | 8.289257658  | 7.744939366 | 7.932479331 | 7.825124023 | 8.308305237 | 8.025722656 | 8.115160286 | 7.86285424  | 8.294127502 | 7.81789355  | 8.289101731 | 7.910828414 |
| AMPZ3A     | 8.190338869 | 8.468537748 | 8.183607313 | 8.1496510225 | 8.495309287  | 8.141996536 | 7.989776847  | 7.828348793 | 8.06410778  | 7.863809256 | 7.828348793 | 8.06410778  | 7.863809256 | 8.030267038 | 8.177579319 | 7.670356935 | 7.760736041 | 7.71753983  |
| CEPRL      | 7.90762379  | 8.321748276 | 8.517756105 | 7.466601216  | 8.173277705  | 8.20012835  | 8.170616785  | 8.456426466 | 7.852932079 | 8.042256707 | 8.042256707 | 7.89942332  | 6.69234443  | 8.857278053 | 7.653453934 | 8.357789245 | 8.050994041 | 8.18929666  |
| SCAMP5     | 8.330271989 | 8.239021905 | 8.239021905 | 7.51343496   | 8.12709857   | 7.96500406  | 8.503016136  | 8.638565075 | 7.912532702 | 7.904438811 | 7.86361809  | 8.151178086 | 6.782546232 | 8.160472034 | 8.352629498 | 7.558019267 | 7.579002074 | 7.48522838  |
| LAMZL1     | 9.06681976  | 7.937843421 | 8.197532885 | 9.067465258  | 8.91857247   | 8.280874268 | 8.382883821  | 8.047514738 | 8.004267052 | 7.979444472 | 7.979444472 | 8.96341397  | 7.218528962 | 7.816296841 | 7.421623663 | 7.78286700  | 7.947099058 | 7.487733485 |
| HERC4      | 8.794278976 | 7.796807572 | 7.687138954 | 8.040442329  | 8.489810073  | 7.900515026 | 7.574594028  | 8.202956228 | 7.801318468 | 8.451671341 | 8.04700848  | 7.625153474 | 7.739159469 | 7.646444109 | 8.211998465 | 8.575992182 | 8.583993044 | 8.687199388 |
| PPDF       | 7.765830064 | 8.045361466 | 8.07723558  | 8.303772626  | 8.033086802  | 8.356216529 | 8.233441951  | 8.033086802 | 8.713875184 | 8.829334645 | 8.139895141 | 8.05001047  | 8.439608719 | 7.849567315 | 8.05587196  | 7.582661675 | 7.224049828 |             |
| SLC39A     | 8.901216925 | 7.896383644 | 8.085295233 | 8.330180145  | 8.121476432  | 8.314723305 | 7.946258519  | 7.848638212 | 8.04667422  | 7.775810239 | 8.042401342 | 8.115909558 | 8.03105207  | 8.044984899 | 7.89751958  | 7.647309739 | 7.541397281 | 8.20517033  |
| MGA2       | 8.657835978 | 8.25439376  | 7.859449335 | 7.019782137  | 8.545184551  | 7.83811068  | 8.0465609376 | 8.003822627 | 7.753689243 | 7.918888176 | 8.07956156  | 8.91075877  | 8.211752395 | 7.615338825 | 8.465398846 | 7.5984435   | 8.652257353 | 8.013242673 |
| EFPIE1     | 8.955220043 | 8.36575606  | 7.98540045  | 8.447248081  | 8.16062008   | 8.461972192 | 7.289259908  | 7.999595907 | 8.35209581  | 7.882086778 | 8.008482738 | 8.140251428 | 8.44262358  | 7.866296599 | 7.870891215 | 7.814937724 | 8.139795193 | 8.079042705 |
| CEPRL      | 7.90762379  | 8.321748276 | 8.517756105 | 7.466601216  | 8.173277705  | 8.20012835  | 8.170616785  | 8.456426466 | 7.852932079 | 8.042256707 | 8.042256707 | 7.89942332  | 6.69234443  | 8.857278053 | 7.653453934 | 8.357789245 | 8.050994041 | 8.18929666  |
| NOCL       | 8.493318937 | 8.74234932  | 7.807232346 | 7.835770821  | 7.835770821  | 7.835770821 | 7.835770821  | 7.921326567 | 7.921326567 | 7.921326567 | 7.921326567 | 7.921326567 | 7.921326567 | 7.921326567 | 7.921326567 | 7.921326567 | 7.921326567 | 7.921326567 |
| IF52       | 8.316569265 | 7.421849069 | 8.229858629 | 7.862138633  | 8.055772964  | 8.687443916 | 8.183715984  | 7.654214019 | 8.445985527 | 7.710332752 | 8.182346288 | 8.794921541 | 8.530447294 | 6.98814332  | 8.055260575 | 8.04781773  | 8.032247307 | 7.888870185 |
| ITG2B      | 7.486920586 | 8.299951577 | 8.351610958 | 7.901983704  | 7.65192096   | 7.509722098 | 8.104257435  | 8.143288411 | 8.145218863 | 8.009479242 | 8.297442683 | 7.973786928 | 7.751546923 | 8.145226726 | 7.985757721 | 7.985757721 | 7.985757721 | 7.985757721 |
| AD0007.1.6 | 8.508157745 | 7.847357566 | 8.41875805  | 8.179088228  | 8.281214285  | 8.606130719 | 7.897630982  | 8.215415538 | 7.457234495 | 7.910251882 | 7.78556524  | 7.94914681  | 8.289486167 | 8.313637493 | 8.091251934 | 7.487014318 | 7.80641231  | 7.980779923 |
| LETM1      | 6.618324678 | 7.502576566 | 8.718666906 | 8.171866906  | 8.212372516  | 7.71832256  | 8.31061984   | 8.317873908 | 7.71832256  | 8.127183215 | 7.819092066 | 8.09703493  | 8.751132841 | 7.70936074  | 8.857209261 | 7.95849701  | 8.081994302 | 7.959721225 |
| ACAD10     | 8.055934334 | 7.233857705 | 8.350175766 | 8.925949708  | 8.214881133  | 7.411821303 | 7.210248826  | 8.177029562 | 8.177029562 | 8.063087183 | 8.019024662 | 7.924399276 | 7.97422328  | 7.73513098  | 8.566287308 | 8.015188262 | 8.408044104 | 8.256224892 |
| SUPV3L1    | 8.689496715 | 7.210923197 | 7.694696195 | 8.123167394  | 8.272282969  | 8.272282969 | 8.272282969  | 8.272282969 | 8.272282969 | 8.272282969 | 8.272282969 | 8.272282969 | 8.272282969 | 8.272282969 | 8.272282969 | 8.272282969 | 8.272282969 | 8.272282969 |
| HLB7       | 8.15923317  | 8.133058567 | 8.133058567 | 8.133058567  | 8.133058567  | 8.133058567 | 8.133058567  | 8.133058567 | 8.133058567 | 8.133058567 | 8.133058567 | 8.133058567 | 8.133058567 | 8.133058567 | 8.133058567 | 8.133058567 | 8.133058567 | 8.133058567 |
| ACEV       | 7.512583202 | 7.052870193 | 6.638256072 | 8.068843971  | 7.987182711  | 8.256463047 | 6.386355336  | 8.515593182 | 8.54177745  | 8.41092974  | 7.57467822  | 8.116023178 | 7.661268607 | 7.132369959 | 8.019212902 | 8.07785025  | 7.57938187  | 7.928418258 |
| CRIP1      | 8.188669956 | 8.188669956 | 8.188669956 | 8.188669956  | 8.188669956  | 8.188669956 | 8.188669956  | 8.188669956 | 8.188669956 | 8.188669956 | 8.188669956 | 8.188669956 | 8.188669956 | 8.188669956 | 8.188669956 | 8.188669956 | 8.188669956 | 8.188669956 |
| DROSHA     | 8.430196579 | 8.176234917 | 7.495693493 | 8.176733491  | 7.481402928  | 8.789398392 | 7.668271924  | 7.922169737 | 8.064148808 | 8.72297935  | 8.208162668 | 8.715894741 | 8.612955804 | 7.599871081 | 8.868418245 | 8.008906685 | 7.94420886  | 7.757483422 |
| ELMOD2     | 8.082096777 | 7.844396894 | 8.014139127 | 7.502989167  | 7.308994525  | 8.416910184 | 8.018990374  | 8.0855999   | 7.75801949  | 8.052991613 | 7.467200852 | 8.528200064 | 7.608345613 | 8.213171396 | 8.071701716 | 7.942634153 | 7.826679194 | 8.27669194  |
| TRK1       | 7.957574444 | 6.314499274 | 6.882768056 | 6.625004104  | 7.534138212  | 7.829871663 | 8.147770057  | 8.281965595 | 8.301169227 | 7.662948599 | 7.820495204 | 7.027031591 | 8.895591669 | 7.376512036 | 8.325236562 | 8.110774248 | 8.235807348 | 8.70654311  |
| PRR3       | 8.03195666  | 8.212329847 | 7.805559159 | 8.705559159  | 8.40983743   | 8.427788071 | 8.387310541  | 8.488152555 | 7.859373516 | 8.184953255 | 7.68        |             |             |             |             |             |             |             |

|          |             |             |             |             |             |             |             |             |             |             |             |             |             |             |             |             |             |             |
|----------|-------------|-------------|-------------|-------------|-------------|-------------|-------------|-------------|-------------|-------------|-------------|-------------|-------------|-------------|-------------|-------------|-------------|-------------|
| CHCHD1   | 8.48885622  | 8.05710801  | 8.18103703  | 7.941747261 | 8.239947533 | 8.350242566 | 7.83103635  | 7.831819681 | 7.998337118 | 8.027903836 | 7.940322015 | 8.12461975  | 8.022360655 | 8.349858266 | 7.571963533 | 7.979856048 | 8.00086852  | 7.657306101 |
| SGMS1    | 8.12185267  | 8.579004407 | 7.90696816  | 8.912704293 | 7.833123178 | 7.629155652 | 7.90046649  | 7.822572081 | 8.21724392  | 7.929656929 | 7.865006011 | 8.223558264 | 8.648627045 | 8.034888774 | 8.161758081 | 8.060351377 | 7.961619524 | 8.255997644 |
| Clio109  | 8.572592802 | 8.186905759 | 8.369983754 | 8.092170623 | 7.749919968 | 7.501875504 | 7.921938786 | 7.905620876 | 8.086649688 | 7.705620823 | 7.536848823 | 8.331843086 | 8.518312183 | 7.415003896 | 7.692952814 | 7.883515647 | 8.043148117 | 7.510844596 |
| HSCB     | 8.548780406 | 7.873197274 | 7.96510784  | 8.449883827 | 8.491175659 | 7.815714297 | 7.800273791 | 7.923362723 | 7.747901165 | 8.201884084 | 8.183575029 | 8.960532349 | 7.441948064 | 8.990544759 | 7.864688318 | 8.055088761 | 8.439966931 | 7.903916498 |
| NPA      | 7.20664056  | 7.777630871 | 7.658483916 | 7.653117999 | 8.51432806  | 8.51432806  | 8.037138089 | 8.634711554 | 8.15204416  | 8.15204416  | 7.776917991 | 7.776917991 | 8.441111808 | 8.541111808 | 7.982321483 | 8.544666611 | 7.982321483 | 8.544666611 |
| ZNF68    | 8.65835561  | 8.46143663  | 8.450474991 | 8.165878565 | 8.029594492 | 8.029594492 | 8.51532034  | 7.505894273 | 7.992320091 | 8.423020091 | 7.887818208 | 8.300879378 | 8.900456504 | 8.576507537 | 7.97259601  | 8.876712042 | 7.87624063  | 8.151435447 |
| JKS1B    | 8.198397476 | 7.042136589 | 8.629218052 | 8.273868694 | 7.831831429 | 8.735835902 | 8.361933964 | 7.94780006  | 8.06666601  | 7.56972865  | 7.940471729 | 8.015013905 | 8.337168222 | 7.541268828 | 7.611695022 | 7.789464900 | 7.467024302 | 8.003117463 |
| ARI2D    | 7.344637392 | 7.674628797 | 8.890166723 | 8.089166723 | 7.078438339 | 7.078438339 | 8.085979348 | 8.085979348 | 8.085979348 | 8.085979348 | 8.311766566 | 7.615839796 | 7.770513133 | 7.830519599 | 8.306551069 | 8.233784922 | 8.276612784 | 8.051121755 |
| ARHGAP17 | 8.353392465 | 8.694233066 | 8.930879051 | 7.702709494 | 7.418522074 | 8.500354799 | 7.77769595  | 7.703638482 | 7.840097441 | 7.90359991  | 8.039364316 | 8.591491622 | 8.50972601  | 8.827602901 | 7.42833192  | 8.292925254 | 7.983468134 | 8.031759531 |
| UBR1     | 8.001357657 | 8.49117343  | 8.251774892 | 7.118662881 | 7.994142781 | 7.855406478 | 8.04964078  | 8.18405883  | 8.080033242 | 7.211914289 | 8.178126252 | 7.98450394  | 8.514260777 | 8.360322866 | 8.514260777 | 8.387950381 | 7.819705931 | 8.07570531  |
| CDC163   | 7.823496856 | 8.49121358  | 8.49121358  | 7.823496856 | 8.49121358  | 8.004933609 | 7.61969424  | 8.008910377 | 8.14604871  | 7.794600897 | 7.65541635  | 8.649025962 | 8.465392319 | 7.935529349 | 7.933968633 | 8.047413856 | 7.909374736 | 7.909374736 |
| MPRL35   | 8.426453711 | 7.9805795   | 8.262971919 | 7.963469937 | 8.300719815 | 8.300719815 | 8.050108989 | 7.53678194  | 7.920001996 | 7.69165372  | 7.69165372  | 8.71607239  | 8.971637831 | 8.25292816  | 7.440068661 | 7.862376608 | 8.066179201 | 7.478466498 |
| ARHGFE40 | 8.366463035 | 8.774204471 | 9.04614272  | 7.491759186 | 8.51192058  | 8.043901368 | 7.76125136  | 8.138497175 | 8.261574419 | 7.842660104 | 8.160565101 | 8.906141274 | 7.878359515 | 7.8964574   | 7.928307976 | 7.68158097  | 8.51432806  | 8.51432806  |
| BORCS7   | 8.157311036 | 7.790045625 | 8.552391773 | 8.239653836 | 8.230524808 | 8.132756463 | 7.969417333 | 7.642178991 | 8.043196401 | 8.029116032 | 8.159782488 | 8.201793489 | 7.507292111 | 7.231348637 | 7.81451575  | 7.854537139 | 7.947285075 | 7.71004663  |
| UPP1     | 7.118018271 | 7.789562018 | 7.995670128 | 7.995670128 | 8.069822604 | 7.998378    | 8.055617711 | 8.307998384 | 8.075193473 | 7.673579157 | 8.460171406 | 8.352622608 | 8.775100382 | 8.402283692 | 8.379052876 | 7.862163207 | 8.06836336  | 7.906790799 |
| PK3CB    | 7.008368002 | 7.065237925 | 7.95675017  | 8.277100191 | 8.379148859 | 7.207637538 | 7.611746466 | 8.422987784 | 8.602826093 | 8.712862473 | 8.05170658  | 6.881765502 | 7.85367246  | 6.182446605 | 7.85367246  | 8.420543614 | 8.056806247 | 8.232299031 |
| XPO4     | 7.686474347 | 7.637477126 | 7.637477126 | 8.141649339 | 8.15183176  | 7.042318694 | 6.540546902 | 7.473134142 | 8.182766054 | 7.75422288  | 7.144134869 | 8.489663711 | 6.056272158 | 7.866306817 | 8.40319392  | 8.588481745 | 9.051769919 | 8.588481745 |
| CHMP6    | 7.759207796 | 7.912520899 | 7.912520899 | 8.004823128 | 8.223218394 | 8.180460252 | 8.053448494 | 7.330240586 | 7.330240586 | 8.00254337  | 8.051457557 | 8.241562361 | 8.319540105 | 7.186803273 | 7.776860721 | 7.905580253 | 7.624035881 | 8.305308971 |
| TMEM189  | 8.803988202 | 7.61926067  | 8.28318013  | 8.283172455 | 8.451182524 | 8.935075704 | 6.799925356 | 6.799925356 | 8.26497125  | 8.22782644  | 7.99483299  | 8.097348689 | 7.339985882 | 7.93552939  | 8.006677055 | 7.382594663 | 7.630998019 | 8.104846806 |
| PELO     | 8.74595486  | 8.251958786 | 8.644846837 | 7.779041912 | 7.989462988 | 7.758780087 | 7.132534507 | 8.09814543  | 8.01768388  | 7.75265059  | 8.325294665 | 8.093901254 | 8.492863555 | 6.973138007 | 8.534518477 | 7.714314329 | 8.014472657 | 8.75623982  |
| IKBG     | 8.301848236 | 8.413496338 | 8.073462082 | 8.024584005 | 8.443746414 | 7.754506451 | 7.754506451 | 7.795189338 | 8.074338169 | 7.65400856  | 8.074338169 | 8.485765009 | 8.760336964 | 7.855523439 | 7.697938514 | 8.00149113  | 8.179782248 | 8.179782248 |
| RAE1     | 8.474168809 | 7.988073815 | 8.307780368 | 8.764407612 | 8.80025566  | 8.717319667 | 8.016434311 | 8.84997856  | 8.39259266  | 7.93592783  | 8.90578731  | 7.782735597 | 8.306067376 | 8.90578731  | 7.278002167 | 8.886452038 | 8.062656219 | 7.760495504 |
| AGO2     | 8.780264207 | 8.029491911 | 7.02555491  | 5.948937829 | 7.923329481 | 7.705056167 | 7.971470185 | 8.995192159 | 8.31868617  | 8.452392965 | 8.86308192  | 8.608623077 | 6.531082978 | 5.989332417 | 9.100979224 | 6.648056406 | 8.571998403 | 8.784150257 |
| DBP      | 8.401961382 | 8.497843261 | 8.363608059 | 8.280470932 | 7.249145631 | 8.649186591 | 7.798697227 | 8.852303459 | 7.964700021 | 7.850079315 | 8.035776123 | 7.249507446 | 8.389427111 | 7.621552288 | 8.039498985 | 7.399132665 | 7.964700021 | 7.964700021 |
| TBC8     | 8.751402984 | 8.608986442 | 8.506493554 | 8.286317894 | 7.600687297 | 8.556708250 | 7.812789131 | 8.11013007  | 8.019536498 | 7.622628089 | 7.980365404 | 8.199154264 | 9.141088773 | 7.675529399 | 7.739043501 | 7.644500898 | 7.475873006 | 7.927250983 |
| RBM19    | 7.491798819 | 8.330001483 | 7.565110094 | 7.917582498 | 7.796274998 | 8.356501932 | 8.516318334 | 7.837507212 | 8.131472707 | 8.490493593 | 7.76298083  | 7.62764166  | 8.502534478 | 8.509039421 | 8.027032331 | 8.401159643 | 7.849884615 | 8.104846806 |
| CLASP8   | 8.308466856 | 8.301582343 | 8.555999896 | 7.908540469 | 8.026044819 | 8.211367273 | 7.881382666 | 8.021982451 | 7.818019505 | 8.012790391 | 7.92506891  | 7.882953667 | 8.584348975 | 7.965375361 | 7.985301125 | 8.786811903 | 8.132625091 | 8.782520931 |
| ARHGDC1  | 8.37495824  | 8.983788346 | 8.198789154 | 8.396240189 | 8.29249497  | 8.989039428 | 8.002754155 | 8.302437331 | 8.302437331 | 8.302437331 | 8.188576958 | 8.320829884 | 8.211638086 | 8.79179471  | 7.996344447 | 8.305350323 | 8.211638086 | 8.305350323 |
| METAP1   | 8.687469656 | 8.687469656 | 8.687469656 | 8.487362717 | 6.568357122 | 8.487362717 | 6.568357122 | 8.268244071 | 8.244498949 | 7.981018559 | 7.932068011 | 8.553158227 | 8.615740718 | 8.858910388 | 8.768840373 | 8.132625091 | 8.132625091 | 8.828531447 |
| TLL12    | 8.710884383 | 7.461911767 | 7.825210552 | 7.131676069 | 7.948093906 | 8.4123016   | 8.714064379 | 7.861777261 | 8.289254885 | 8.10739656  | 7.803731433 | 8.250970855 | 7.832162458 | 8.193565519 | 7.989329296 | 8.09800484  | 9.70455519  | 8.342380376 |
| ANKRD16  | 8.60234332  | 8.638265566 | 8.489138905 | 8.446682767 | 8.017190579 | 7.97420397  | 8.151181029 | 8.151181029 | 8.151181029 | 8.151181029 | 8.575434042 | 7.955341278 | 9.000663107 | 7.864032021 | 7.85710812  | 8.27725157  | 7.979446677 | 7.979446677 |
| PUPP1    | 7.715939836 | 7.947846724 | 8.422669711 | 9.05862919  | 7.75580463  | 9.105223352 | 8.347148256 | 8.172798113 | 8.323205525 | 8.044888751 | 8.76112088  | 7.468220838 | 8.197487812 | 7.63014507  | 7.859822986 | 7.702320317 | 7.548022737 | 8.414343903 |
| SIC2A12  | 7.239391953 | 8.164622848 | 8.274893566 | 8.38747381  | 7.97097588  | 5.642970121 | 8.62143076  | 8.10897924  | 8.263711778 | 7.108743776 | 7.686526353 | 7.594420089 | 8.58485203  | 7.981059889 | 8.010662062 | 7.606937583 | 8.01153032  | 8.01153032  |
| RHOBTB7  | 8.06237191  | 8.37679455  | 8.50414845  | 7.835865411 | 9.064009135 | 8.768802809 | 8.467117533 | 8.258597443 | 8.169141986 | 7.586380179 | 7.772625873 | 7.942455456 | 6.225133498 | 7.305386711 | 8.048481669 | 8.102719035 | 7.750083455 | 7.885760031 |
| Clio198  | 7.550643345 | 7.85658114  | 7.767121457 | 8.396240189 | 8.29249497  | 8.989039428 | 8.002754155 | 8.302437331 | 8.302437331 | 8.302437331 | 8.188576958 | 8.320829884 | 8.211638086 | 8.79179471  | 7.996344447 | 8.305350323 | 8.211638086 | 8.305350323 |
| IKBKG    | 8.100222942 | 8.100222942 | 8.100222942 | 8.100222942 | 8.100222942 | 8.100222942 | 8.100222942 | 8.100222942 | 8.100222942 | 8.100222942 | 8.100222942 | 8.100222942 | 8.100222942 | 8.100222942 | 8.100222942 | 8.100222942 | 8.100222942 | 8.100222942 |
| SNAP25   | 8.397796078 | 8.425182194 | 7.409296394 | 8.416239253 | 7.889419089 | 8.126457272 | 8.051760005 | 7.661454293 | 8.264004763 | 8.01281928  | 8.085541156 | 7.726411185 | 7.221688405 | 8.673266447 | 7.404427784 | 9.796793016 | 9.306533432 | 7.248130006 |
| NRN      | 8.40397518  | 8.40397518  | 8.40397518  | 8.40397518  | 8.40397518  | 8.40397518  | 8.40397518  | 8.40397518  | 8.40397518  | 8.40397518  | 8.40397518  | 8.40397518  | 8.40397518  | 8.40397518  | 8.40397518  | 8.40397518  | 8.40397518  | 8.40397518  |
| ALMS1    | 7.973246849 | 7.78178363  | 8.001463284 | 6.127017812 | 9.546581698 | 7.684120118 | 5.754591251 | 7.894541087 | 8.141242547 | 7.764083743 | 8.58970227  | 8.612701997 | 9.248664816 | 7.68664865  | 8.052097945 | 8.225363245 | 8.69115866  | 8.048381633 |
| TMEM199  | 8.390744884 | 8.76238785  | 8.76238785  | 8.76238785  | 8.76238785  | 8.76238785  | 8.76238785  | 8.76238785  | 8.76238785  | 8.76238785  | 8.76238785  | 8.76238785  | 8.76238785  | 8.76238785  | 8.76238785  | 8.76238785  | 8.76238785  | 8.76238785  |
| MR1      | 7.34317032  | 8.02771622  | 7.066774227 | 8.055606933 | 8.2279785   | 7.88981996  | 8.172145445 | 8.00818731  | 7.968514952 | 8.091756616 | 7.96841868  | 7.76228055  | 8.282952969 | 8.217366352 | 7.746730544 | 7.984430292 | 8.23967822  | 7.71395919  |
| RCL1     | 8.506080792 | 9.187216154 | 7.066687174 | 8.767137385 | 7.591797777 | 7.499030616 | 8.180312081 | 7.628187394 | 8.196319071 | 8.50430776  | 7.850416077 | 8.50430776  | 8.196319071 |             |             |             |             |             |

|          |             |             |             |             |             |             |             |             |              |             |             |             |             |             |             |             |             |             |
|----------|-------------|-------------|-------------|-------------|-------------|-------------|-------------|-------------|--------------|-------------|-------------|-------------|-------------|-------------|-------------|-------------|-------------|-------------|
| AKAP11   | 8.501914886 | 7.504811327 | 8.384727785 | 7.462415838 | 8.274063704 | 7.966818658 | 8.319242424 | 7.947022388 | 8.342532117  | 7.447138018 | 8.175872134 | 6.646622244 | 7.658880804 | 6.234197488 | 8.018110612 | 8.106031619 | 7.967891001 | 7.349181895 |
| ELP3     | 7.229391254 | 7.998719058 | 7.68853218  | 8.212042027 | 8.170659176 | 8.599040272 | 7.836550102 | 7.258518273 | 7.74801402   | 7.949908932 | 7.648832369 | 8.248300655 | 8.64345625  | 8.073334412 | 7.926944345 | 8.266928635 | 7.919624584 | 7.981652787 |
| SLP2R    | 8.501763459 | 8.501763459 | 8.501763459 | 7.978376461 | 8.781698126 | 7.777956988 | 7.816949824 | 7.816949824 | 7.617007746  | 7.617007746 | 7.977202689 | 8.784701637 | 8.485380568 | 8.811728222 | 7.68231437  | 7.6485332   | 7.304445081 | 7.346454023 |
| NEB      | 7.26794297  | 6.125409066 | 8.804029966 | 7.603608704 | 7.496907185 | 9.142732343 | 8.600179952 | 8.065619323 | 8.280039797  | 7.573207166 | 7.863404275 | 7.842430016 | 7.735759963 | 9.352426441 | 8.830225077 | 9.352426441 | 8.700779294 | 8.557731305 |
| TMU1     | 8.753509858 | 6.758034733 | 8.620890777 | 7.658034733 | 7.99849847  | 7.494148485 | 7.95699582  | 8.101862344 | 8.240184447  | 8.650782832 | 7.844827828 | 7.487840533 | 8.547071343 | 7.855035444 | 7.855035444 | 7.855035444 | 7.890119768 | 8.21112342  |
| MYS1M    | 7.568076277 | 7.568076277 | 7.568076277 | 7.636676675 | 7.763666704 | 7.763666704 | 7.198604646 | 7.198604646 | 7.473694923  | 7.759674777 | 7.476482865 | 7.832590868 | 7.940944412 | 8.861702043 | 8.861702043 | 8.861702043 | 8.213035782 | 8.546526425 |
| RPSMG1   | 8.537863552 | 6.488611976 | 7.838383617 | 7.746088248 | 8.554092754 | 7.892866537 | 7.362116803 | 7.992861044 | 7.925336065  | 8.539839844 | 7.480739588 | 8.510365151 | 7.062417523 | 7.828828021 | 8.306747586 | 8.37965298  | 8.649117901 | 8.911202949 |
| PSMG1    | 8.916324814 | 7.674808462 | 8.170075796 | 7.746088248 | 8.554092754 | 7.892866537 | 7.362116803 | 7.992861044 | 7.925336065  | 8.539839844 | 7.480739588 | 8.510365151 | 7.062417523 | 7.828828021 | 8.306747586 | 8.37965298  | 8.649117901 | 8.911202949 |
| ITPA     | 8.093451269 | 8.532503582 | 8.960297286 | 7.837595904 | 8.441311645 | 8.53112794  | 8.046036094 | 7.9977171   | 7.685699303  | 7.840479093 | 8.789272286 | 8.097386029 | 7.707547962 | 8.16114904  | 7.920424567 | 7.966265524 | 7.953986112 | 7.74609997  |
| ANKDD1A  | 7.430032609 | 8.542575013 | 7.960846685 | 8.580991217 | 7.067447353 | 7.816945512 | 7.968284982 | 8.007654652 | 7.502237034  | 8.299211208 | 8.085406275 | 6.51792266  | 8.251286987 | 7.621126073 | 8.083836996 | 7.570339515 | 7.935054094 |             |
| PUS1L    | 7.995831769 | 8.112451843 | 7.870691569 | 8.159818844 | 7.993873749 | 8.118721026 | 8.288603162 | 7.95412801  | 7.729601077  | 7.729601077 | 7.995831769 | 8.112451843 | 8.378081447 | 8.200692199 | 7.814551188 | 7.97262925  | 7.506883057 | 8.086091918 |
| MYS1Z    | 8.278110151 | 8.215739055 | 8.0354986   | 7.535454551 | 8.105105298 | 7.708916689 | 7.42258911  | 7.932594402 | 8.09617574   | 8.057220099 | 8.001384398 | 8.134441037 | 7.987434008 | 7.915800581 | 7.756282514 | 7.756282514 | 7.756282514 | 8.311260105 |
| SNRP     | 8.388883556 | 8.388883556 | 8.388883556 | 7.713735746 | 7.755014409 | 8.334018806 | 8.86770467  | 7.991800746 | 8.205238667  | 7.672143754 | 7.900176239 | 8.66573079  | 7.92816086  | 7.656769287 | 7.78400898  | 8.101315912 | 7.854144559 | 8.190920607 |
| INFP1    | 7.98442046  | 8.244102715 | 8.44210232  | 7.964300494 | 7.9536364   | 8.20966144  | 8.040267509 | 7.896717964 | 7.905514073  | 7.747420481 | 7.6542982   | 8.579305578 | 8.27651771  | 6.987693897 | 7.645719975 | 7.708196709 | 7.482519645 | 8.782007778 |
| Coro7f2  | 7.388392004 | 7.984799879 | 7.984799879 | 8.101762297 | 7.700366859 | 8.252660813 | 8.002666101 | 7.79274436  | 7.831677738  | 7.980347523 | 8.295224806 | 7.080369829 | 7.936540206 | 8.093282823 | 7.644785781 | 7.644882841 | 7.532396246 | 8.049024063 |
| NEDD1    | 7.980528074 | 5.67623147  | 8.258370427 | 6.946581364 | 8.015414315 | 8.597535828 | 5.987976511 | 7.486504777 | 8.326947996  | 8.110623483 | 7.9358485   | 8.458641038 | 8.980643093 | 8.403485161 | 7.689758964 | 8.42799332  | 7.846379119 | 8.09038052  |
| DHCR7    | 7.842144877 | 8.602977028 | 8.208937017 | 7.328339051 | 7.73540059  | 7.520365357 | 7.73540059  | 7.561443068 | 7.923312751  | 7.923312751 | 7.971232751 | 8.497292392 | 6.881800801 | 7.580657571 | 7.941703911 | 8.320450106 | 7.924184119 | 8.488104263 |
| TMCC1    | 8.002129314 | 8.664841871 | 8.273886649 | 8.664841871 | 7.655402172 | 7.907940197 | 7.655402172 | 7.469901977 | 7.844236123  | 7.844236123 | 7.58997083  | 8.227077975 | 7.910118641 | 8.276494865 | 7.539954733 | 8.097952648 | 7.928634307 | 7.71424363  |
| HOMER2   | 7.949378288 | 6.664050478 | 8.97327722  | 8.024710134 | 7.829582448 | 7.90295563  | 7.432033559 | 7.774308556 | 7.833730464  | 8.075189612 | 8.141389612 | 8.372916638 | 8.323528438 | 9.039971606 | 7.399457745 | 8.426981597 | 7.961601845 | 7.961601845 |
| BAX      | 7.362950826 | 8.179828279 | 7.685660676 | 8.179828279 | 8.414774267 | 8.102216274 | 7.916008    | 7.724862843 | 7.687166988  | 7.812949125 | 7.809405169 | 8.139166463 | 8.380363744 | 7.144746151 | 8.005885863 | 8.165599457 | 7.108676435 | 7.985611149 |
| CDK12    | 8.629782967 | 8.280023418 | 8.730290399 | 8.280023418 | 7.713735746 | 7.755014409 | 7.515255153 | 7.274737981 | 8.257546311  | 8.287187718 | 7.402040887 | 7.916564116 | 7.047851889 | 6.768826908 | 7.296027901 | 8.28686728  | 7.879510897 | 8.054375026 |
| IRAK4    | 7.870025871 | 7.759645571 | 8.589930225 | 6.854276728 | 8.125302299 | 8.241580624 | 8.488454483 | 8.024127844 | 8.294306463  | 8.040509599 | 7.768047121 | 7.951104296 | 6.03283481  | 6.448753337 | 7.688615706 | 8.143105806 | 7.956032717 | 7.328439674 |
| HLQ1     | 7.800537973 | 7.846066801 | 9.027046419 | 8.949425279 | 6.274474821 | 8.026829692 | 7.554528474 | 7.730247018 | 8.664264299  | 7.170279055 | 8.327061184 | 8.066658162 | 7.923861735 | 8.165833981 | 8.081564616 | 7.936416817 | 7.970188341 | 7.831106689 |
| MDP1     | 7.987597233 | 7.212754581 | 8.599955678 | 7.917631452 | 8.487602556 | 8.275717604 | 7.719598233 | 8.11562192  | 7.794096987  | 8.027853998 | 8.071323584 | 8.508306616 | 8.094736814 | 7.620652258 | 7.829308697 | 7.973966652 | 7.368504266 |             |
| TIAM1    | 8.02934422  | 7.497468083 | 8.121436601 | 6.851421528 | 7.063158501 | 8.379669494 | 7.68883698  | 8.256036647 | 8.025900778  | 8.625139381 | 7.687909066 | 7.335891463 | 8.025213194 | 7.218841994 | 8.052194359 | 7.879143483 | 7.869508599 |             |
| TAOK1    | 7.558716883 | 6.613879742 | 8.384543367 | 7.390424410 | 7.995674698 | 7.528173929 | 8.021609365 | 7.92675249  | 8.177360771  | 7.601742991 | 6.847535653 | 7.265432939 | 6.156001608 | 7.975126486 | 8.410300576 | 8.126176319 | 7.60657198  |             |
| CMCA     | 8.252751223 | 8.13341718  | 8.123229503 | 8.106263242 | 8.200721392 | 8.175693803 | 7.309720833 | 7.539170757 | 7.794541862  | 7.319384121 | 7.776719991 | 8.644689711 | 8.571040099 | 8.049999994 | 7.219457293 | 7.270996426 | 7.445949056 | 7.426448668 |
| TMU2     | 8.732033362 | 8.732033362 | 8.732033362 | 7.592246736 | 7.592246736 | 7.592246736 | 8.156929251 | 8.093279884 | 8.093279884  | 8.272774459 | 7.652544464 | 6.525444464 | 6.525444464 | 6.525444464 | 6.525444464 | 6.525444464 | 6.525444464 | 8.214461237 |
| MED2A    | 7.935646807 | 7.875548307 | 8.01966681  | 7.935646807 | 7.997784272 | 7.489319766 | 7.957233346 | 8.278251563 | 8.16377171   | 7.93959912  | 8.410256219 | 8.814210389 | 7.583024462 | 8.010794336 | 8.366024804 | 7.865256389 | 7.865256389 |             |
| CS26AG   | 8.216548339 | 7.959393568 | 6.489274463 | 8.248163928 | 8.38777661  | 7.521953892 | 7.384112069 | 8.182554695 | 7.746124672  | 7.942877009 | 8.082349668 | 7.78097545  | 6.946350559 | 7.590972785 | 8.415607242 | 8.025030155 | 8.127283198 | 7.899449422 |
| KCNBR2   | 8.114402428 | 8.340131078 | 8.371313858 | 7.920751027 | 8.371313858 | 7.920751027 | 8.371313858 | 7.920751027 | 8.371313858  | 8.08323     | 7.600410608 | 8.018078968 | 8.118873417 | 7.767546388 | 7.975176313 | 7.712148712 | 7.759429621 |             |
| TMEM216  | 9.032578062 | 8.915053201 | 8.575768153 | 8.26320438  | 8.161983394 | 8.106456881 | 7.984302099 | 7.749344474 | 7.910095122  | 7.817524171 | 8.085021615 | 8.302901748 | 8.203430074 | 7.749149421 | 7.609322247 | 7.882475123 | 7.50496199  | 7.818790318 |
| FR3A     | 6.63467496  | 7.134640926 | 6.655052748 | 7.963287811 | 8.164939387 | 7.596395792 | 8.286126449 | 8.064547684 | 8.280126449  | 8.126135884 | 8.251491595 | 8.133744699 | 8.685918204 | 6.295439939 | 7.986581508 | 7.770405729 | 7.96673639  | 8.14448266  |
| ATG16L2  | 7.923483717 | 6.661293178 | 8.283038482 | 8.114444063 | 7.11292344  | 7.689429415 | 8.249941244 | 7.968174742 | 8.3161369507 | 8.076442778 | 7.239108813 | 8.599917882 | 6.428277432 | 8.354046349 | 7.480664614 | 8.17097165  | 8.147458249 |             |
| ATG16L1  | 8.296343226 | 8.296343226 | 8.296343226 | 7.407097673 | 8.489421009 | 7.65013325  | 7.581979709 | 8.226513042 | 7.819275008  | 8.182623067 | 7.954623067 | 8.051872592 | 6.768940259 | 8.04621703  | 7.917613954 | 8.175065669 | 8.175065669 |             |
| NET116   | 8.194004405 | 8.194004405 | 8.194004405 | 8.325903088 | 7.827342506 | 7.964242612 | 8.16019631  | 7.949819086 | 8.066057177  | 7.957973277 | 8.099198214 | 7.957973277 | 8.099198214 | 7.957973277 | 8.099198214 | 7.957973277 | 8.099198214 | 8.1021082   |
| CDKN1C   | 7.950919391 | 7.440915507 | 8.393904685 | 7.736850828 | 7.887405054 | 8.101618379 | 8.261282384 | 8.056593103 | 8.187726608  | 8.16583919  | 8.24993874  | 7.539446512 | 8.13333788  | 8.496993834 | 7.819349715 | 7.774884161 | 7.931001911 | 7.47558086  |
| PANK2    | 7.439278296 | 7.617541274 | 8.85092381  | 8.62082313  | 7.892312518 | 9.106939421 | 8.376336808 | 8.109178378 | 8.369433527  | 8.141737898 | 8.105966001 | 6.638549514 | 9.02910199  | 8.58988148  | 7.981668107 | 7.900621616 | 7.886610899 | 8.188000823 |
| TBC1D10B | 7.660957655 | 8.69640949  | 8.273263057 | 8.254938985 | 7.83948422  | 7.185487438 | 8.014575687 | 7.933447162 | 8.28481251   | 8.061708761 | 7.954664604 | 7.452304489 | 7.608738166 | 8.650316272 | 7.904760701 | 7.700458004 | 7.907534192 | 8.734160808 |
| GNP3     | 8.105871242 | 8.056531643 | 8.056531643 | 8.663187371 | 8.187471772 | 8.397484986 | 7.925243793 | 8.126112747 | 8.126112747  | 8.108410841 | 7.591951925 | 7.958508019 | 7.879772563 | 7.564480241 | 7.931636304 | 7.959215923 | 7.959215923 | 8.105871242 |
| INT5A    | 8.730892047 | 8.717404988 | 8.717404988 | 8.015040863 | 7.608723935 | 7.061168542 | 7.814627886 | 8.208889222 | 7.945019596  | 8.68713029  | 8.116023602 | 7.676967077 | 8.314106458 | 7.909977731 | 8.084900625 | 8.073242371 | 7.93974066  |             |
| ORAI1    | 7.512120957 | 7.713906470 | 8.713906470 | 8.713906470 | 7.819736977 | 7.819736977 | 8.249587728 | 7.639117318 | 8.249587728  | 7.50711667  | 8.182612805 | 8.22570267  | 7.794507259 | 8.099970293 | 7.3410      |             |             |             |



|             |             |             |             |              |              |             |             |             |             |             |             |             |             |             |              |             |              |              |
|-------------|-------------|-------------|-------------|--------------|--------------|-------------|-------------|-------------|-------------|-------------|-------------|-------------|-------------|-------------|--------------|-------------|--------------|--------------|
| RP2L6L1     | 8.29624158  | 8.341670003 | 8.324144421 | 8.151304372  | 7.959095875  | 8.225345198 | 7.636505044 | 7.604726277 | 7.785191934 | 7.50684947  | 7.645215978 | 8.03495578  | 8.258946339 | 8.085690195 | 7.066920134  | 7.571782664 | 7.263983443  | 7.805653774  |
| NU8P5       | 7.861459447 | 7.910848023 | 7.701265992 | 7.771105577  | 7.309900811  | 7.809800887 | 8.653280095 | 8.069226229 | 7.302823481 | 8.451012722 | 7.709810528 | 7.550549485 | 7.937810627 | 8.254212995 | 7.958053758  | 7.814592456 | 8.539923318  | 7.903410924  |
| G8E1        | 7.751290177 | 7.570041675 | 7.884141907 | 8.667111477  | 8.44825367   | 7.880282329 | 8.651755037 | 7.880282329 | 7.831959567 | 8.087901921 | 7.673752165 | 8.526855085 | 8.086933528 | 8.295734714 | 7.3543559423 | 7.918890321 | 7.866728735  | 7.808007231  |
| TRB3        | 8.941218665 | 8.79430678  | 8.405365633 | 7.290200012  | 8.437321461  | 8.473973503 | 8.737395878 | 7.596808006 | 8.513998512 | 7.779841431 | 7.614347116 | 7.547374835 | 7.586468299 | 8.413135531 | 7.781025884  | 7.981073348 | 7.757246054  | 7.168421674  |
| CL4L3       | 8.45764021  | 8.142300774 | 8.216808556 | 8.404403929  | 8.704054784  | 7.923129009 | 8.218908466 | 8.218908466 | 8.134179626 | 8.134179626 | 7.983790211 | 7.706599317 | 8.577057637 | 8.661367079 | 7.782660563  | 7.833167026 | 8.235511079  | 7.286516050  |
| TR10P       | 7.149370234 | 7.593705344 | 8.28617322  | 8.28617322   | 8.17674864   | 8.15533993  | 8.623149135 | 7.901259349 | 8.164654161 | 7.71557479  | 7.155926442 | 7.964892461 | 7.964892461 | 7.554404515 | 7.032329292  | 7.87078289  | 7.688009567  | 8.088009567  |
| KWFL9L1     | 7.97608114  | 7.922508343 | 8.606211165 | 8.135658675  | 7.763400045  | 8.053428746 | 7.463023955 | 7.616763247 | 7.578752865 | 7.986937579 | 7.673491004 | 7.525689052 | 7.602910288 | 7.877933948 | 7.547041136  | 8.134055671 | 7.896668227  | 7.861481799  |
| CUH19L1     | 7.142011589 | 8.249573263 | 8.493217045 | 8.249573263  | 7.875146599  | 8.543650143 | 7.75148681  | 7.641266557 | 7.761322182 | 7.761322182 | 7.439140047 | 8.749593173 | 6.81273221  | 6.926879416 | 8.041987754  | 7.440106153 | 7.900629438  | 7.913688805  |
| ADCK2       | 7.884692837 | 7.859248107 | 7.934717405 | 8.463260375  | 8.287865722  | 6.93301387  | 8.310243684 | 7.613466247 | 7.827243558 | 7.579865785 | 7.912371815 | 8.042765448 | 7.800814539 | 7.861797489 | 7.982247834  | 7.941693262 | 7.551872587  | 7.349537593  |
| CZD5        | 7.918092021 | 7.021993556 | 7.940274261 | 8.052093546  | 8.030977887  | 8.526266539 | 6.538772027 | 7.808775121 | 7.901783763 | 7.94814475  | 6.874016512 | 6.391645087 | 7.451593819 | 8.189800002 | 8.33091564   | 7.854756086 | 7.369529611  | 8.33091564   |
| MMGT1       | 8.004738909 | 7.932930209 | 7.82310973  | 8.489798629  | 7.459798826  | 7.252484589 | 8.066760588 | 8.112246589 | 7.912246589 | 7.912246589 | 7.903474736 | 7.590819116 | 8.164784423 | 7.45155599  | 7.690533277  | 8.160747211 | 7.806271767  | 7.820521767  |
| BN0T7       | 7.559940233 | 7.825176917 | 8.684656682 | 7.500384499  | 8.518118528  | 8.529914324 | 7.762587161 | 7.459221257 | 7.864797777 | 7.731788637 | 7.730570212 | 8.004686137 | 8.052490191 | 7.88894078  | 7.549288506  | 7.70342436  | 7.625034802  | 8.20714435   |
| KDM6B       | 7.465143248 | 7.639165988 | 6.541199658 | 6.541199658  | 6.858252015  | 7.91749582  | 7.834579871 | 8.74190798  | 8.434132603 | 8.969351199 | 7.49174692  | 7.67564302  | 7.54150685  | 8.47934927  | 9.028193836  | 8.169479448 | 8.62551281   | 8.62551281   |
| LPC4T3      | 7.034912214 | 7.323653436 | 5.878618267 | 8.25206195   | 7.923216378  | 8.169031491 | 7.21533943  | 8.21680519  | 8.112711641 | 8.112711641 | 7.827365541 | 8.052164177 | 8.457983189 | 7.72176176  | 8.258012207  | 7.31278045  | 7.602157681  | 9.063042155  |
| LSM6        | 8.00673181  | 8.267700837 | 8.429102717 | 8.267700837  | 7.948066627  | 8.265284757 | 7.294273773 | 7.546582807 | 8.007633494 | 8.16411922  | 7.958666742 | 7.76016394  | 8.398259126 | 7.926634436 | 7.517643903  | 7.73541927  | 7.72649257   | 7.988187424  |
| DPY19L1     | 8.002595683 | 7.757639685 | 8.077046463 | 7.719212494  | 7.772004674  | 7.880755283 | 7.691477162 | 7.850382545 | 7.938863761 | 8.065211024 | 7.704054613 | 8.320212235 | 7.935055305 | 7.495230255 | 7.36529223   | 7.553123528 | 7.930942021  | 7.869640805  |
| AC01        | 7.849209231 | 6.039836374 | 6.463173025 | 8.039826775  | 8.621275239  | 8.493826922 | 7.900014432 | 7.79381006  | 8.280075263 | 8.102257195 | 7.903926682 | 5.763761753 | 6.158028664 | 7.743635789 | 7.409170438  | 7.792617325 | 7.9015213423 | 7.9015213423 |
| TSK2        | 7.620244049 | 8.669581895 | 8.604877339 | 8.331139901  | 7.995323238  | 7.089706223 | 7.615438641 | 7.488389609 | 8.33126378  | 7.772590331 | 7.984926749 | 7.320768022 | 8.544602224 | 7.975295686 | 7.765534996  | 8.79587892  | 8.202208454  | 7.170596308  |
| SWMPD       | 7.84676449  | 8.085457535 | 7.784273998 | 8.225838885  | 7.840283325  | 7.984875556 | 8.077003408 | 7.978443356 | 7.712700964 | 7.898644826 | 7.987432083 | 8.006252991 | 8.227077451 | 7.57194312  | 7.519543473  | 7.519543473 | 7.525839815  | 7.525839815  |
| PHF23       | 8.360893442 | 8.537396996 | 8.142300774 | 7.715484463  | 7.874699372  | 8.432013983 | 7.440719537 | 7.44217375  | 7.604298362 | 7.609111981 | 7.585149922 | 8.257509335 | 7.537261285 | 8.300136203 | 7.869150032  | 8.054234426 | 7.487441379  | 7.122786614  |
| TRD3        | 8.179820052 | 8.239452389 | 7.210474271 | 7.688995269  | 8.14902107   | 7.859853183 | 8.20745026  | 7.751907082 | 7.651971711 | 7.882365095 | 8.299113469 | 7.31124407  | 8.409811284 | 7.643181095 | 9.926601959  | 7.89512791  | 7.521918863  | 7.521918863  |
| SLC2A8      | 8.075112812 | 8.982492192 | 8.340313438 | 8.105464836  | 8.052198777  | 7.996861838 | 7.978371747 | 7.646344344 | 8.301549588 | 7.768941497 | 7.978322277 | 7.888619745 | 7.426185388 | 7.548176854 | 8.28745026   | 7.622044195 | 7.85303375   | 7.990154999  |
| A8HD18      | 7.536802212 | 7.885040445 | 7.963448561 | 7.965049492  | 7.062445458  | 6.699811615 | 8.335144972 | 7.856293119 | 7.94791696  | 7.915916828 | 7.778467539 | 8.028438699 | 7.40783369  | 7.114448969 | 7.969121208  | 7.537353101 | 7.421092226  | 7.885289131  |
| BT4         | 7.773449378 | 7.08347323  | 8.885939599 | 7.76467097   | 8.9085347    | 8.06992911  | 8.521467282 | 8.096992159 | 8.521467282 | 8.195053052 | 8.28697772  | 7.31299683  | 8.799631899 | 8.71580352  | 7.108418629  | 7.817638175 | 7.875080232  | 7.774135937  |
| CF5F7       | 8.04039761  | 7.874217294 | 7.850358582 | 7.879416004  | 7.96959671   | 8.20013868  | 7.907632995 | 7.626454065 | 8.775359796 | 7.730359796 | 7.774371549 | 7.41395365  | 8.092166088 | 8.052126276 | 7.86581396   | 7.878011928 | 8.023075911  | 7.826740043  |
| FX08        | 7.85148796  | 8.529390152 | 7.514891686 | 7.435400002  | 7.828352673  | 7.96232177  | 7.528398413 | 7.871554817 | 8.002911875 | 7.754099268 | 7.86525968  | 7.964186365 | 8.23336698  | 8.29574116  | 7.772415935  | 7.86831952  | 8.02516513   | 7.762466431  |
| SLC5244     | 7.606086531 | 6.984384842 | 7.154715008 | 7.606248281  | 7.047791062  | 7.432691836 | 8.547369269 | 7.578698513 | 7.927187467 | 7.888438353 | 7.805309291 | 8.480217083 | 6.267641549 | 8.174192244 | 7.893244436  | 8.071069635 | 7.46435905   | 8.053919851  |
| CTB-SOLL1.1 | 7.520786074 | 7.120786074 | 7.520786074 | 7.520786074  | 7.520786074  | 7.520786074 | 7.520786074 | 7.520786074 | 7.520786074 | 7.520786074 | 7.520786074 | 7.520786074 | 7.520786074 | 7.520786074 | 7.520786074  | 7.520786074 | 7.520786074  | 7.520786074  |
| NO1P6       | 8.593738394 | 8.291675108 | 7.523623488 | 7.58886231   | 8.06551638   | 8.479509078 | 7.878799639 | 7.578486107 | 7.892321245 | 7.832675347 | 7.93816466  | 8.089651026 | 8.05967434  | 7.154301387 | 8.211179152  | 7.61718197  | 7.527615706  | 8.372490545  |
| CNG2        | 8.25496191  | 8.248619398 | 8.449896910 | 7.649935361  | 8.428359168  | 7.649981374 | 7.752635478 | 7.901117373 | 7.778102156 | 7.750548209 | 8.001590112 | 9.119588604 | 7.835654323 | 7.763069898 | 7.725173399  | 7.515963077 | 7.985093992  | 7.985093992  |
| DTX2        | 7.535535288 | 7.602634546 | 7.225575379 | 7.699312648  | 7.40429709   | 7.728762639 | 8.502920753 | 7.448642991 | 8.105574289 | 7.765931989 | 7.929906806 | 8.330347778 | 8.001624699 | 8.632823545 | 7.667724487  | 8.005750315 | 8.007552986  | 7.546627464  |
| KR11        | 8.789720065 | 8.35476185  | 8.53282984  | 8.23443467   | 7.808457866  | 7.50080761  | 7.8735424   | 7.712300919 | 7.712300919 | 7.712300919 | 7.669760846 | 7.482764393 | 7.992396762 | 7.665788414 | 7.920650788  | 7.85693198  | 7.96711848   | 7.555482257  |
| GALN16      | 7.837048667 | 8.966111085 | 7.718071394 | 8.370075456  | 6.85818612   | 8.114450198 | 6.864339957 | 8.211002116 | 8.26481897  | 7.753882967 | 7.53882967  | 8.317311329 | 9.101501407 | 7.70467974  | 7.846264897  | 9.927277152 | 7.887029044  | 7.455109925  |
| RF15        | 7.60709098  | 8.769083133 | 7.650808997 | 7.589774315  | 7.650808997  | 8.220296611 | 8.827005978 | 7.440719537 | 7.440719537 | 7.898339343 | 7.747769397 | 8.04748804  | 6.126326092 | 7.901591291 | 9.015323706  | 7.910555094 | 7.910555094  | 7.910555094  |
| FAM22B      | 8.317925946 | 7.852042952 | 7.355402952 | 7.73514013   | 7.67946034   | 7.36946034  | 7.36946034  | 8.118905054 | 8.070565481 | 8.252752028 | 7.5885701   | 8.45945508  | 8.061194902 | 8.219193128 | 8.96238366   | 8.581125251 | 8.96238366   | 8.581125251  |
| VPS50       | 8.291143282 | 8.124485421 | 8.236878982 | 7.608939087  | 8.13350491   | 7.647325306 | 7.736915354 | 6.615146693 | 8.21133808  | 7.909417991 | 8.07519499  | 8.017256622 | 6.550019519 | 8.006243603 | 7.585488588  | 8.139413883 | 7.970255155  | 7.63027902   |
| ANKR054     | 8.58013494  | 8.089237522 | 8.142485421 | 8.089237522  | 8.191937984  | 8.092206807 | 7.7583236   | 7.643794818 | 7.712391491 | 8.18545484  | 7.65377996  | 7.20856684  | 8.11291871  | 8.007105609 | 8.256219558  | 7.59866895  | 8.011801339  | 7.570256547  |
| RWD03       | 8.144968748 | 8.307434604 | 8.692565705 | 8.649818584  | 6.982274832  | 7.300903355 | 7.856952015 | 7.169392033 | 8.0278733   | 7.806759306 | 7.431825976 | 7.873058983 | 8.840916501 | 8.539023259 | 6.997797159  | 8.141555979 | 7.467016787  | 7.038306794  |
| CTor26      | 8.20528878  | 7.544024357 | 8.53282984  | 8.23443467   | 7.808457866  | 7.50080761  | 7.8735424   | 7.712300919 | 7.712300919 | 7.712300919 | 7.669760846 | 7.482764393 | 7.992396762 | 7.665788414 | 7.920650788  | 7.85693198  | 7.96711848   | 7.555482257  |
| RGPD5       | 7.638238685 | 7.389180676 | 7.879017852 | 7.4849017852 | 7.4849017852 | 6.89302438  | 7.17079916  | 9.428417434 | 8.084020204 | 9.627120391 | 9.24110384  | 7.029671662 | 7.68001477  | 7.167156544 | 9.072847983  | 9.171400207 | 9.00133896   | 9.171400207  |
| MOV10       | 8.076207358 | 7.289780606 | 7.587996813 | 7.48658286   | 7.655013104  | 7.518496958 | 7.873018353 | 8.194541426 | 7.855353564 | 8.14668133  | 7.425206492 | 6.286451882 | 8.565546223 | 8.112569945 | 7.982495049  | 7.945251695 | 8.121908885  | 8.121908885  |
| ARH0F1      | 8.578957851 | 7.945309457 | 7.845309457 | 7.845309457  | 7.845309457  | 7.8453094   |             |             |             |             |             |             |             |             |              |             |              |              |

|             |             |             |             |             |             |             |             |             |             |             |             |             |             |             |             |             |             |             |
|-------------|-------------|-------------|-------------|-------------|-------------|-------------|-------------|-------------|-------------|-------------|-------------|-------------|-------------|-------------|-------------|-------------|-------------|-------------|
| MBTFS2      | 7.542267256 | 7.857911079 | 7.328687072 | 7.791016227 | 8.443064669 | 7.732350051 | 8.074713497 | 7.617620039 | 8.046280998 | 7.951186158 | 7.923912434 | 7.529335711 | 8.529020727 | 7.822646618 | 8.029107551 | 8.077039371 | 7.589724663 | 8.262472559 |
| SAP30L      | 7.337374948 | 7.475758227 | 7.707999921 | 7.837901162 | 8.00494727  | 7.96623905  | 7.83801297  | 7.838091835 | 8.253902944 | 7.77413206  | 8.049640539 | 7.521107172 | 7.846285121 | 7.514059352 | 7.89136232  | 7.90296236  | 7.381551713 | 7.7768766   |
| PARP12      | 8.485299599 | 9.26043545  | 8.388247731 | 7.65598374  | 7.99784488  | 7.255284245 | 7.79556186  | 7.824800665 | 7.755630314 | 8.774800665 | 7.811808989 | 7.579383189 | 6.797688254 | 6.91002411  | 7.966256257 | 7.81248766  | 7.922879609 | 8.575780601 |
| APH18       | 7.566087523 | 7.583614914 | 7.717158243 | 7.989631045 | 8.100052959 | 8.259810516 | 8.088808271 | 7.95145662  | 7.46262278  | 7.878953536 | 7.995134197 | 7.983862633 | 7.801358063 | 7.529710322 | 7.491240374 | 8.012393382 | 7.360293884 | 7.490767578 |
| BKS1        | 7.542384195 | 7.849365719 | 7.939368259 | 7.849368259 | 7.939368259 | 7.849368259 | 7.939368259 | 7.849368259 | 7.939368259 | 7.849368259 | 7.939368259 | 7.849368259 | 7.939368259 | 7.849368259 | 7.939368259 | 7.849368259 | 7.939368259 | 7.849368259 |
| GPW0V       | 8.50323663  | 8.29083664  | 7.321889997 | 7.962112724 | 7.850235644 | 7.713288997 | 7.465432797 | 7.699556662 | 7.557295457 | 7.872656477 | 7.516323858 | 8.29186002  | 6.348765526 | 7.80244734  | 8.109688984 | 7.153851485 | 8.127702216 | 7.629381834 |
| VK11        | 7.785558583 | 8.229880319 | 8.065553329 | 8.220791107 | 7.916576056 | 8.081897905 | 8.397684904 | 7.79185192  | 7.931763491 | 6.733007579 | 7.743776842 | 7.728781632 | 7.239610109 | 8.681398192 | 6.762183864 | 7.886557336 | 7.736867984 | 7.655452975 |
| RPF2        | 7.913065424 | 7.856877196 | 7.746064314 | 7.856772196 | 7.746064314 | 7.856772196 | 7.746064314 | 7.856772196 | 7.746064314 | 7.856772196 | 7.746064314 | 7.856772196 | 7.746064314 | 7.856772196 | 7.746064314 | 7.856772196 | 7.746064314 | 7.856772196 |
| SFTZD2      | 6.382231954 | 7.572609387 | 8.973135791 | 7.080720217 | 7.581676205 | 8.53929768  | 8.935927319 | 8.15996069  | 7.923401309 | 7.813240305 | 8.094196163 | 6.482146414 | 9.340584118 | 8.126197097 | 7.703602844 | 8.108117477 | 8.376015277 | 7.702210234 |
| CHM1P1A     | 8.088659088 | 8.579141984 | 8.494843165 | 8.154268505 | 7.855211321 | 7.90908997  | 8.170837657 | 7.687057385 | 7.611828314 | 7.88982021  | 7.8781236   | 7.778407758 | 7.395992864 | 7.836546162 | 7.52261323  | 7.41457199  | 7.806808362 | 8.162502589 |
| CZD1B3      | 7.348006376 | 7.629023224 | 8.006363736 | 7.825473019 | 7.340961821 | 7.718392917 | 8.136099177 | 7.90965947  | 8.189222533 | 7.718785649 | 7.364169389 | 8.570480613 | 9.241819951 | 7.836813504 | 7.868045068 | 7.700398574 | 7.838120313 | 7.88120313  |
| ZVF55       | 7.435531391 | 8.295586112 | 6.427889777 | 7.209196028 | 7.970710166 | 7.209196028 | 6.016298114 | 7.93209274  | 7.843718254 | 7.810073987 | 7.740825798 | 8.200409108 | 9.964892149 | 6.514655701 | 7.523844942 | 7.934473388 | 8.466918204 | 7.115794032 |
| PP21R5B     | 7.851801965 | 6.980686681 | 7.790693971 | 8.355813754 | 8.126953203 | 7.081761395 | 8.085718074 | 7.822566477 | 7.516323858 | 8.29186002  | 6.348765526 | 7.80244734  | 8.109688984 | 7.153851485 | 8.127702216 | 7.629381834 | 7.490767578 | 7.849368259 |
| JMSD        | 7.737055979 | 7.142636203 | 6.333882295 | 7.5736236   | 7.430907057 | 7.78913375  | 7.42060822  | 7.504379497 | 8.26324903  | 7.884513186 | 7.854650158 | 8.181052947 | 7.239921693 | 8.308291771 | 8.072503121 | 8.127073111 | 7.800707341 | 7.870707341 |
| SCD7        | 7.859641424 | 8.23135674  | 6.832226643 | 7.523061104 | 6.73406286  | 6.84543906  | 8.244426717 | 7.731984744 | 7.646346335 | 7.81883868  | 8.34324234  | 8.046674652 | 7.859835717 | 6.286748658 | 7.093144527 | 8.88984454  | 7.80779244  | 7.800707341 |
| NUD2T       | 8.382809938 | 7.910152997 | 7.761713683 | 8.088182959 | 7.493829763 | 8.317057261 | 7.914604514 | 7.606104255 | 7.996950507 | 7.32030506  | 7.75638933  | 7.985219574 | 8.135725162 | 8.23917998  | 7.306449678 | 7.536819022 | 7.383348928 | 7.73488377  |
| MMZ22B      | 8.850788406 | 8.374131981 | 8.196395161 | 8.037224579 | 8.196395161 | 8.037224579 | 8.196395161 | 8.037224579 | 8.196395161 | 8.037224579 | 8.196395161 | 8.037224579 | 8.196395161 | 8.037224579 | 8.196395161 | 8.037224579 | 8.196395161 | 8.037224579 |
| ZNF133      | 8.295451128 | 8.389357179 | 8.112686934 | 7.292307805 | 8.49365573  | 8.074562842 | 8.791155276 | 7.528999846 | 7.710221886 | 7.818450318 | 7.752040984 | 6.688337148 | 8.217418012 | 8.605050225 | 7.626481532 | 7.852449931 | 8.356362678 | 7.06080798  |
| KIA1A32B    | 8.189432596 | 7.61339877  | 7.61339877  | 7.729395309 | 8.361741127 | 7.591108993 | 7.74118945  | 8.165462514 | 7.656520158 | 7.929721947 | 7.54675638  | 6.995193956 | 7.991588626 | 7.49636117  | 8.133750312 | 7.929666093 | 8.29774886  | 8.237199867 |
| TRTPA       | 7.589544669 | 7.298446669 | 7.298446669 | 7.589544669 | 7.298446669 | 7.589544669 | 7.298446669 | 7.589544669 | 7.298446669 | 7.589544669 | 7.298446669 | 7.589544669 | 7.298446669 | 7.589544669 | 7.298446669 | 7.589544669 | 7.298446669 | 7.589544669 |
| HEJAN       | 8.939232066 | 7.316249412 | 7.879422679 | 7.419328604 | 8.10883703  | 7.83385653  | 7.98420115  | 7.789460908 | 7.580350025 | 7.200442964 | 8.782782518 | 8.660254881 | 8.536676192 | 8.27844759  | 7.622425878 | 7.267771155 | 7.52610117  | 7.37849444  |
| DENDD4C     | 7.524732013 | 7.492153189 | 8.464076619 | 7.86123809  | 7.33239371  | 6.30100316  | 8.536916165 | 8.98082879  | 8.583616165 | 8.05961151  | 7.81471844  | 7.14290845  | 7.731861807 | 8.025613122 | 7.721344622 | 8.547182154 | 7.806958285 | 8.676138919 |
| CDCD3C      | 7.376141006 | 5.569821346 | 6.563993079 | 6.781065532 | 6.412468523 | 7.912643313 | 8.733697622 | 8.508783553 | 7.742014615 | 8.17377401  | 7.820700783 | 7.428634444 | 8.017866701 | 7.53633368  | 8.010952512 | 8.036640037 | 7.847459326 | 7.968982854 |
| ECHD3C      | 7.526189386 | 5.914313981 | 7.526189386 | 8.85579771  | 7.836199783 | 7.695214777 | 7.088385858 | 5.777668855 | 8.076694198 | 7.83105932  | 8.074851633 | 6.494441472 | 7.90262576  | 7.661840129 | 7.267763502 | 8.183298774 | 8.67188234  | 7.67188234  |
| FCMR        | 8.858756653 | 8.364582981 | 8.465765951 | 7.289348365 | 6.967396705 | 8.587711359 | 8.620734985 | 7.465447098 | 8.783629454 | 7.260734432 | 8.21571824  | 8.18608574  | 7.114941023 | 8.105628525 | 7.44463248  | 7.42999792  | 7.42999792  | 7.42999792  |
| CH507-9B2.1 | 6.971458852 | 7.50036762  | 7.545880916 | 7.534180057 | 6.311138665 | 7.984503058 | 8.036062475 | 8.277227949 | 7.903503373 | 8.731803877 | 7.444718905 | 8.867565084 | 7.760519308 | 8.625267077 | 7.923018694 | 7.340978821 | 8.376260411 | 8.376260411 |
| GFZT1E      | 8.395752043 | 7.295491096 | 7.845558647 | 7.573208476 | 8.185675324 | 8.185024859 | 8.042462159 | 7.669259606 | 7.816551354 | 7.359666818 | 7.65729638  | 7.91378344  | 5.94385268  | 7.342046612 | 7.86943176  | 7.631217463 | 7.941609579 | 8.30634931  |
| TRP2E       | 7.89318524  | 7.89318524  | 7.89318524  | 7.89318524  | 7.89318524  | 7.89318524  | 7.89318524  | 7.89318524  | 7.89318524  | 7.89318524  | 7.89318524  | 7.89318524  | 7.89318524  | 7.89318524  | 7.89318524  | 7.89318524  | 7.89318524  | 7.89318524  |
| SAMD9       | 7.75374147  | 7.786756102 | 7.53147502  | 6.649808116 | 7.746051024 | 7.03775473  | 8.016900168 | 7.919296021 | 8.146076923 | 7.76182447  | 8.325399601 | 7.296473985 | 8.394090925 | 8.218069101 | 8.583315317 | 7.70802247  | 7.83051856  | 7.83051856  |
| CH52C5Y     | 7.797376503 | 8.306511565 | 8.363151648 | 8.282628321 | 8.163401061 | 8.195305499 | 7.86348461  | 7.378030396 | 7.685371155 | 7.542920666 | 7.384914929 | 7.61413399  | 7.967556736 | 7.943696358 | 6.876168324 | 7.9323497   | 7.725197143 | 7.307469827 |
| THEM6       | 7.632684268 | 7.737750547 | 8.415802038 | 8.195425242 | 7.470655705 | 7.922489702 | 8.051624028 | 7.98956316  | 7.542952522 | 7.95773189  | 8.260486712 | 8.192447304 | 8.54137716  | 7.62753808  | 6.72755237  | 7.65423197  | 7.62753808  | 7.62753808  |
| ULKI        | 7.421141655 | 6.988438738 | 7.640094194 | 7.296678847 | 7.854645074 | 7.296678847 | 7.854645074 | 7.296678847 | 7.854645074 | 7.296678847 | 7.854645074 | 7.296678847 | 7.854645074 | 7.296678847 | 7.854645074 | 7.296678847 | 7.854645074 | 7.296678847 |
| VEZF1       | 7.036362834 | 8.21347498  | 7.734214361 | 7.533212208 | 7.49486318  | 8.390040853 | 8.28344432  | 8.19916699  | 8.018264159 | 8.175842009 | 8.082612726 | 7.357844227 | 7.666746094 | 7.30236331  | 8.156488992 | 7.918043655 | 7.982302531 | 7.801490523 |
| BN3         | 7.571356233 | 7.576806618 | 8.457872561 | 8.642026174 | 8.128262127 | 7.418734671 | 8.235294624 | 7.847972624 | 7.781260211 | 7.889581714 | 7.638098464 | 7.315775226 | 8.78535909  | 7.83947887  | 7.819725507 | 7.703239767 | 7.549631931 | 7.888454676 |
| TRP2E       | 7.89318524  | 7.89318524  | 7.89318524  | 7.89318524  | 7.89318524  | 7.89318524  | 7.89318524  | 7.89318524  | 7.89318524  | 7.89318524  | 7.89318524  | 7.89318524  | 7.89318524  | 7.89318524  | 7.89318524  | 7.89318524  | 7.89318524  | 7.89318524  |
| DAG1        | 7.407587987 | 6.462512743 | 7.07309626  | 8.92371028  | 7.98771028  | 7.98771028  | 7.98771028  | 7.98771028  | 7.98771028  | 7.98771028  | 7.98771028  | 7.98771028  | 7.98771028  | 7.98771028  | 7.98771028  | 7.98771028  | 7.98771028  | 7.98771028  |
| NFS1        | 8.553443384 | 9.098012976 | 7.864230956 | 8.54715256  | 8.05899381  | 7.943072924 | 7.24122614  | 7.710793412 | 6.70082559  | 8.05384181  | 7.399947337 | 8.22154862  | 9.276420995 | 7.693896633 | 7.643131785 | 7.66427375  | 7.90651982  | 7.790654626 |
| PKN0K1      | 8.118177034 | 7.444704863 | 8.495111387 | 7.444704863 | 8.495111387 | 7.444704863 | 8.495111387 | 7.444704863 | 8.495111387 | 7.444704863 | 8.495111387 | 7.444704863 | 8.495111387 | 7.444704863 | 8.495111387 | 7.444704863 | 8.495111387 | 7.444704863 |
| ZNF721      | 7.162578247 | 7.416880934 | 8.44912442  | 8.082455404 | 8.297975488 | 7.37486941  | 8.061597022 | 7.727899323 | 8.148093919 | 7.953205991 | 8.28813295  | 7.825159942 | 8.194892465 | 6.790083873 | 7.547976309 | 8.155364112 | 7.694906188 | 7.948125734 |
| ZBED4       | 7.846372582 | 8.645803083 | 7.910274914 | 8.042812905 | 8.295377251 | 7.806899923 | 8.295377251 | 7.806899923 | 8.295377251 | 7.806899923 | 8.295377251 | 7.806899923 | 8.295377251 | 7.806899923 | 8.295377251 | 7.806899923 | 8.295377251 | 7.806899923 |
| SIC25A2S    | 7.40323667  | 5.528057275 | 6.410324121 | 6.951238194 | 7.925295559 | 8.041609419 | 7.78663653  | 8.438781366 | 8.22473153  | 7.864859893 | 7.996875678 | 6.90067448  | 6.811533151 | 5.562952842 | 8.123081596 | 7.98899479  | 6.983341731 | 7.669931974 |
| MANEAL      | 7.724375647 | 7.805375755 | 8.417790874 | 7.613790874 | 7.970939194 | 7.902974358 | 7.542979704 | 7.654065821 | 7.923240273 |             |             |             |             |             |             |             |             |             |



|           |             |             |             |              |             |             |             |             |             |             |             |             |             |             |             |             |             |             |
|-----------|-------------|-------------|-------------|--------------|-------------|-------------|-------------|-------------|-------------|-------------|-------------|-------------|-------------|-------------|-------------|-------------|-------------|-------------|
| NEK8      | 7.258348701 | 8.019639608 | 7.284460663 | 7.763674358  | 7.619535014 | 7.470462019 | 7.785442412 | 7.975280792 | 8.152529081 | 7.93502936  | 8.01128979  | 7.346921821 | 7.819145381 | 7.827190716 | 7.792175596 | 8.021381064 | 8.231767212 | 7.54778239  |
| RAB3B     | 7.529953716 | 7.64459546  | 7.697150633 | 7.813948026  | 7.408905031 | 7.796993475 | 8.100575716 | 7.669625475 | 8.28607408  | 7.8965253   | 8.07734373  | 7.754267735 | 7.962015827 | 8.295611407 | 8.216032166 | 7.620998938 | 8.224353968 | 7.770656367 |
| PTP88     | 7.770728306 | 8.197581234 | 7.8288005   | 7.839252918  | 8.14785921  | 7.791294872 | 8.265776665 | 7.647834898 | 7.901545314 | 7.665294504 | 7.905848726 | 8.60671353  | 7.962015827 | 8.295611407 | 8.216032166 | 7.620998938 | 8.224353968 | 7.770656367 |
| MTG2      | 7.743763821 | 7.507614336 | 7.513747433 | 7.78867635   | 8.444159114 | 7.66255109  | 8.027183127 | 7.562605865 | 7.97579857  | 7.75301458  | 7.994874326 | 7.89485681  | 8.71727572  | 8.164224597 | 7.207130512 | 7.921113663 | 7.71796952  | 7.821457513 |
| RAP85     | 7.07265432  | 7.82038863  | 8.101021808 | 7.87813879   | 8.293629654 | 8.293629654 | 8.293629654 | 8.293629654 | 7.792057963 | 7.892057963 | 8.016646487 | 7.850177089 | 8.135400224 | 7.78613598  | 7.693161697 | 7.74335877  | 7.47385379  | 7.626243239 |
| DCS2      | 7.276934825 | 7.786972865 | 8.487298675 | 7.566717265  | 8.15528841  | 8.007719799 | 7.84079823  | 7.564762169 | 7.81320059  | 7.73085352  | 7.993817527 | 8.45555945  | 8.089624237 | 8.051492373 | 7.110316691 | 7.54561421  | 6.982724499 | 7.676222589 |
| SE13      | 7.771006993 | 8.558283365 | 8.591573324 | 7.306499444  | 7.886412645 | 7.467844636 | 7.518380085 | 8.738776211 | 8.703407767 | 7.65609897  | 7.908295266 | 7.611459872 | 8.05233671  | 8.578159002 | 8.109834087 | 7.847253111 | 7.999834132 | 7.515399387 |
| RNF111    | 7.810203799 | 7.386768229 | 7.386768229 | 7.302109644  | 7.506427085 | 7.7999817   | 7.595266647 | 7.595266647 | 7.595266647 | 7.926065568 | 7.704911999 | 8.135855076 | 7.6618575   | 8.586171606 | 7.703224302 | 7.866199769 | 7.753340324 | 7.808744758 |
| NAA25     | 7.304259347 | 7.443465706 | 7.664628842 | 8.175091933  | 7.74507779  | 8.295028839 | 5.936182739 | 7.810008807 | 7.835330859 | 7.797439603 | 7.630219139 | 8.578202025 | 7.839525746 | 7.462204903 | 8.097590419 | 8.316594466 | 7.998337642 | 7.96875514  |
| AARS2     | 8.181113623 | 8.079297652 | 8.079297652 | 8.181113623  | 8.181113623 | 8.181113623 | 8.181113623 | 8.181113623 | 8.181113623 | 8.181113623 | 8.181113623 | 8.181113623 | 8.181113623 | 8.181113623 | 8.181113623 | 8.181113623 | 8.181113623 | 8.181113623 |
| SIC25A43  | 7.748610077 | 7.802260855 | 7.802260855 | 7.748610077  | 7.802260855 | 7.802260855 | 7.802260855 | 7.802260855 | 7.802260855 | 7.802260855 | 7.802260855 | 7.802260855 | 7.802260855 | 7.802260855 | 7.802260855 | 7.802260855 | 7.802260855 | 7.802260855 |
| MYO9A     | 8.173256589 | 7.339421036 | 8.466624656 | 6.079011993  | 7.240471765 | 7.77440849  | 6.134728316 | 7.398429684 | 8.155256278 | 8.23846829  | 7.504290604 | 6.42638258  | 8.83570248  | 7.432418516 | 8.656184188 | 8.389210612 | 8.15992698  | 7.622174916 |
| SK16      | 8.121665249 | 7.24562729  | 7.631053395 | 8.562315883  | 8.418334134 | 8.439490719 | 7.233315218 | 7.553876122 | 7.65353203  | 7.786590504 | 8.473820276 | 8.01534827  | 7.627360836 | 8.19470081  | 7.909747199 | 7.221085353 |             |             |
| CIJUA1    | 8.124665483 | 8.260354298 | 8.245451845 | 7.090524465  | 7.870635861 | 8.610941215 | 7.8422607   | 6.919717132 | 7.585823342 | 7.454098522 | 7.667392837 | 8.655711693 | 8.116450715 | 8.578792822 | 6.904227641 | 7.600270032 | 7.48035571  | 7.746942814 |
| FXI06     | 8.268820821 | 7.104705653 | 7.390837607 | 7.507851624  | 7.847186801 | 7.662407799 | 8.201313493 | 7.623849895 | 8.039303351 | 8.77219477  | 7.670803821 | 8.021738651 | 7.761345671 | 7.856148005 | 7.704235695 | 7.706991519 | 7.942724512 | 7.811203859 |
| WWP1      | 7.074881435 | 6.806309994 | 6.627134916 | 8.486452173  | 7.474226339 | 7.845993752 | 7.795688989 | 8.214753488 | 7.60839196  | 8.233435166 | 7.849614563 | 7.806902376 | 6.926472289 | 7.689177499 | 8.354678779 | 7.334927895 | 8.318085234 | 7.824355451 |
| TASP1     | 7.891157364 | 7.529289845 | 7.71866852  | 6.695078869  | 7.179479212 | 8.073489648 | 6.489626148 | 7.594519649 | 8.060388855 | 7.689645474 | 7.762801447 | 8.332576881 | 8.100638711 | 6.081703773 | 7.827994102 | 7.880237676 | 8.083131349 | 7.773187868 |
| ZNF184    | 7.398901112 | 8.218491434 | 8.006841349 | 7.862781075  | 7.85941529  | 8.132284796 | 7.74068983  | 7.406899808 | 8.193966568 | 7.725147832 | 7.116724526 | 5.714437634 | 8.390210336 | 7.538312041 | 7.993114947 | 6.525283832 | 7.132757607 | 7.992781025 |
| TFE3      | 8.113208008 | 6.30895917  | 7.40122581  | 8.055632023  | 7.727595406 | 8.137377004 | 7.871657135 | 8.101440573 | 8.027970927 | 7.72079927  | 7.170815536 | 7.259806919 | 7.426564847 | 8.081358292 | 7.619907082 | 7.602596959 | 7.687779713 |             |
| ABH13     | 8.197485217 | 7.735286663 | 8.717028881 | 8.483799732  | 7.847263196 | 8.019633026 | 7.514343253 | 7.756222118 | 7.901749158 | 7.901749158 | 7.403980032 | 8.377582457 | 8.269694593 | 7.870059429 | 7.645736607 | 7.466378645 | 7.742489946 | 7.806534261 |
| ZNF250    | 7.776504548 | 8.494651388 | 7.257115649 | 7.4707731978 | 8.035936883 | 7.868014394 | 8.149388373 | 7.904505644 | 7.779387689 | 7.953808527 | 8.395980547 | 7.75196226  | 7.495320201 | 6.147998415 | 7.819459554 | 8.022397355 | 7.7556312   | 7.405053539 |
| PRRC24    | 8.163644002 | 7.938805567 | 7.507773911 | 7.638046177  | 7.70256485  | 7.943097906 | 7.71051961  | 7.762034433 | 7.762034433 | 7.762034433 | 7.762034433 | 7.762034433 | 7.762034433 | 7.762034433 | 7.762034433 | 7.762034433 | 7.762034433 | 7.762034433 |
| PUS3      | 8.442435561 | 8.330414355 | 7.404820057 | 7.805974848  | 7.973541703 | 8.426718767 | 7.936467998 | 7.724156743 | 7.768556817 | 7.741301399 | 7.789729126 | 8.770611565 | 7.443279018 | 7.726986807 | 7.042998416 | 8.385434537 | 7.924641109 | 7.50112639  |
| SCIN      | 7.85515759  | 9.17053576  | 9.3902738   | 7.773717196  | 8.3272475   | 7.296848908 | 8.071141449 | 8.19240195  | 7.773717196 | 7.553541174 | 6.602412078 | 9.133021427 | 7.21610941  | 7.411942839 | 7.539028133 | 7.951428339 | 7.951201396 | 7.951201396 |
| PTP92     | 7.958738145 | 7.269921373 | 7.794752551 | 7.855520002  | 7.486321966 | 8.087300404 | 7.16875373  | 7.56056508  | 6.6932446   | 7.6932446   | 7.93014936  | 7.009152949 | 6.74502152  | 7.794582572 | 7.134186366 | 7.896620716 | 8.059646989 | 7.747788622 |
| CTNS      | 7.995365258 | 7.056605459 | 6.444520503 | 7.10763902   | 7.439486607 | 8.984976954 | 7.79348691  | 8.853888921 | 7.795616224 | 7.771164392 | 7.62175628  | 8.505750184 | 8.140283653 | 7.805463883 | 7.685231507 | 7.802239748 | 7.472792744 | 7.544543684 |
| KYAT3     | 7.986231658 | 7.684258868 | 7.554096049 | 8.007138972  | 7.627131272 | 7.364679453 | 8.010313519 | 7.798117436 | 8.236678299 | 7.785601249 | 8.063472853 | 8.559496174 | 6.231473143 | 6.532252912 | 7.996241659 | 7.789286386 | 7.495100502 | 8.316502094 |
| ITPK      | 6.584954337 | 8.543510211 | 7.978706117 | 7.543510211  | 7.978706117 | 7.543510211 | 7.978706117 | 7.543510211 | 7.978706117 | 7.543510211 | 7.978706117 | 7.543510211 | 7.978706117 | 7.543510211 | 7.978706117 | 7.543510211 | 7.978706117 | 7.543510211 |
| PAWR      | 7.806304335 | 7.286617071 | 8.403363176 | 8.537413926  | 9.02219025  | 8.264851115 | 8.456706785 | 7.924179538 | 8.144675461 | 7.77953167  | 7.719233904 | 6.47828283  | 7.258721399 | 7.190437533 | 7.844984794 | 7.98849852  | 7.539693123 | 7.612552716 |
| LBH       | 7.021563079 | 7.408675387 | 7.180008455 | 8.282666243  | 7.814396419 | 8.770521995 | 7.855214794 | 7.770521995 | 8.14338093  | 7.632893546 | 8.120857881 | 8.01549169  | 7.30299051  | 7.524519095 | 7.923792207 | 7.603995521 | 8.04802676  | 7.803232391 |
| COG7      | 8.090179396 | 7.051658709 | 7.807211574 | 7.81631342   | 7.678732322 | 7.707700828 | 6.821898875 | 7.659462116 | 7.707700828 | 6.821898875 | 7.659462116 | 7.707700828 | 6.821898875 | 7.659462116 | 7.707700828 | 6.821898875 | 7.659462116 | 7.707700828 |
| STP61     | 7.63431704  | 8.717401198 | 8.373011296 | 8.717401198  | 8.373011296 | 8.717401198 | 8.373011296 | 8.717401198 | 8.373011296 | 8.717401198 | 8.373011296 | 8.717401198 | 8.373011296 | 8.717401198 | 8.373011296 | 8.717401198 | 8.373011296 | 8.717401198 |
| ZNF44     | 8.09466023  | 8.671222053 | 7.702059099 | 8.079982133  | 7.239915161 | 7.537887207 | 6.771459887 | 7.919059441 | 7.973167271 | 7.552880376 | 7.919059441 | 7.973167271 | 7.552880376 | 7.919059441 | 7.973167271 | 7.552880376 | 7.919059441 | 7.973167271 |
| SKX2P     | 7.954856485 | 8.218212711 | 7.572392997 | 7.796200171  | 6.279389044 | 7.2312373   | 5.800212622 | 8.020783413 | 7.572392997 | 6.279389044 | 7.2312373   | 5.800212622 | 8.020783413 | 7.572392997 | 6.279389044 | 7.2312373   | 5.800212622 | 8.020783413 |
| CP10      | 7.975804574 | 7.978097247 | 7.732711324 | 7.978097247  | 7.732711324 | 7.978097247 | 7.732711324 | 7.978097247 | 7.732711324 | 7.978097247 | 7.732711324 | 7.978097247 | 7.732711324 | 7.978097247 | 7.732711324 | 7.978097247 | 7.732711324 | 7.978097247 |
| AT7       | 7.322691889 | 8.244975794 | 8.086732222 | 7.904904535  | 7.224688209 | 7.815239721 | 7.263215243 | 7.765906521 | 7.993832754 | 7.329070124 | 7.607881924 | 9.20041908  | 7.426004341 | 8.39178394  | 7.889065185 | 7.484607337 | 7.723315307 | 8.401421058 |
| SRXN1     | 7.999075907 | 8.563444158 | 6.938716195 | 7.999075907  | 8.563444158 | 6.938716195 | 7.999075907 | 8.563444158 | 6.938716195 | 7.999075907 | 8.563444158 | 6.938716195 | 7.999075907 | 8.563444158 | 6.938716195 | 7.999075907 | 8.563444158 | 6.938716195 |
| SMNDC1    | 8.359525156 | 7.544646828 | 7.349716322 | 8.182612662  | 7.778191889 | 7.418503117 | 7.617374882 | 7.840085133 | 7.97167515  | 7.57109423  | 7.96357472  | 8.321163046 | 8.102138544 | 8.44602893  | 7.802461839 | 7.477855121 | 7.691418623 | 7.677679294 |
| PPM1F     | 7.300788604 | 7.200786068 | 7.993409585 | 7.200788604  | 7.993409585 | 7.200788604 | 7.993409585 | 7.200788604 | 7.993409585 | 7.200788604 | 7.993409585 | 7.200788604 | 7.993409585 | 7.200788604 | 7.993409585 | 7.200788604 | 7.993409585 | 7.200788604 |
| CDKN2A2P1 | 7.826779317 | 7.825439323 | 7.733464293 | 7.733464293  | 7.733464293 | 7.733464293 | 7.733464293 | 7.733464293 | 7.733464293 | 7.733464293 | 7.733464293 | 7.733464293 | 7.733464293 | 7.733464293 | 7.733464293 | 7.733464293 | 7.733464293 | 7.733464293 |
| ABCL10    | 7.975879827 | 7.925779827 | 7.451971246 | 7.740671059  | 7.81432621  | 7.63042506  | 7.599061969 | 7.973736243 | 7.740671059 | 7.81432621  | 7.63042506  | 7.599061969 | 7.973736243 | 7.740671059 | 7.81432621  | 7.63042506  | 7.599061969 | 7.973736243 |
| TRIM6     | 7.815492273 | 7.885780245 | 8.078191831 | 7.38393334   | 7.996060654 | 8.367240861 | 6.946252633 | 7.72058452  |             |             |             |             |             |             |             |             |             |             |

|            |             |             |             |              |             |             |             |             |             |             |             |             |             |             |             |             |             |             |
|------------|-------------|-------------|-------------|--------------|-------------|-------------|-------------|-------------|-------------|-------------|-------------|-------------|-------------|-------------|-------------|-------------|-------------|-------------|
| MPZ13      | 5.84359876  | 7.61128297  | 5.834636324 | 7.784922982  | 6.826067878 | 8.119052045 | 7.396758657 | 7.704918494 | 8.74785491  | 8.042657014 | 8.393113165 | 7.73804038  | 8.579958032 | 7.464395226 | 7.805852667 | 8.453438865 | 7.756824199 | 8.31463077  |
| SPATZAL    | 7.500142608 | 7.99440471  | 7.180873061 | 7.333942868  | 7.851953135 | 8.017808926 | 7.74273147  | 7.536491419 | 7.159287141 | 7.79856647  | 7.063410114 | 7.423217347 | 8.058642803 | 7.93813139  | 7.865129139 | 7.56002459  | 8.025452464 | 7.856502322 |
| DCTP11     | 8.256572691 | 8.466328419 | 7.697145722 | 8.284622596  | 8.255252383 | 7.82761668  | 7.101398852 | 7.184425492 | 7.605488262 | 7.317144996 | 7.336643069 | 8.352207821 | 8.058541689 | 8.026666913 | 7.105435832 | 7.572509693 | 7.421415267 | 7.736502322 |
| THS19      | 7.131369949 | 7.619610235 | 5.597714347 | 5.983031114  | 6.566803068 | 7.184420545 | 7.606138887 | 8.030295941 | 7.695361325 | 7.674034035 | 7.71100609  | 7.726858181 | 9.023432171 | 8.022221599 | 8.589138434 | 9.359996337 | 8.44852268  | 8.59416154  |
| EMC1       | 7.402799679 | 7.402799679 | 7.402799679 | 7.402799679  | 7.402799679 | 7.402799679 | 7.402799679 | 7.402799679 | 7.402799679 | 7.402799679 | 7.402799679 | 7.402799679 | 7.402799679 | 7.402799679 | 7.402799679 | 7.402799679 | 7.402799679 | 7.402799679 |
| Cher76     | 7.816742693 | 7.461437274 | 7.5025303   | 7.800205114  | 7.085467791 | 7.583467791 | 8.067388947 | 7.546730847 | 7.692740852 | 8.020473178 | 7.482592545 | 7.785858715 | 7.90011747  | 7.685523388 | 8.023316847 | 7.58929287  | 8.139702134 | 7.47849409  |
| NHE11      | 8.165448096 | 8.371241984 | 7.705678039 | 7.851162178  | 7.906588764 | 8.506919958 | 7.889047669 | 7.456778893 | 7.81475641  | 7.28646149  | 7.480686814 | 7.901260187 | 9.568381351 | 8.109305278 | 7.061191943 | 7.416382183 | 8.000085408 | 7.554705504 |
| MEM110     | 7.518581407 | 8.022781121 | 7.022781121 | 7.518581407  | 8.406808753 | 8.181658382 | 8.814838636 | 7.527862328 | 8.16988542  | 7.68043435  | 7.43991336  | 7.449048006 | 8.048994534 | 8.195129093 | 8.030565426 | 7.434973967 | 7.8631767   | 7.22282801  |
| SLC2A      | 7.458393080 | 7.53813172  | 8.180633588 | 8.03023612   | 7.39536635  | 8.521700796 | 8.19516421  | 7.8167614   | 7.937833485 | 7.717086414 | 7.743991336 | 7.449048006 | 8.048994534 | 8.195129093 | 8.030565426 | 7.434973967 | 7.8631767   | 7.22282801  |
| TFCP2      | 8.303040692 | 7.518581407 | 7.277372737 | 7.866801581  | 8.02032703  | 7.208228623 | 7.2094125   | 7.837633174 | 7.5700677   | 7.7006777   | 7.65118626  | 7.448831788 | 8.142959927 | 7.26698085  | 7.327962061 | 7.915585211 | 7.842413892 | 7.907161631 |
| NU37       | 7.471695716 | 7.626472482 | 7.811908277 | 7.629701748  | 7.869691622 | 8.122447428 | 7.489059213 | 7.534903923 | 8.257019191 | 7.58087389  | 7.90518826  | 8.227984184 | 8.036145799 | 6.314836141 | 8.444745162 | 7.964891946 | 7.740108879 | 7.428631961 |
| RP11-330H6 | 7.111848007 | 7.111848007 | 7.111848007 | 7.111848007  | 7.111848007 | 7.111848007 | 7.111848007 | 7.111848007 | 7.111848007 | 7.111848007 | 7.111848007 | 7.111848007 | 7.111848007 | 7.111848007 | 7.111848007 | 7.111848007 | 7.111848007 | 7.111848007 |
| COMM2D     | 8.46054256  | 8.473415892 | 7.562613714 | 8.574416746  | 8.28604545  | 9.192489831 | 7.456385956 | 7.572159709 | 7.849808371 | 7.435808146 | 7.71669578  | 7.992827951 | 8.082347062 | 6.908152149 | 7.007720243 | 7.586258983 | 7.599448538 | 7.89095920  |
| UMPS       | 7.036280769 | 7.916092425 | 8.611933901 | 7.916092425  | 8.137936945 | 7.59373719  | 7.986771735 | 7.583235353 | 7.560770927 | 7.537040392 | 7.818271726 | 8.679033719 | 7.640167425 | 7.88271526  | 7.253630313 | 7.105989303 | 7.5630313   | 7.5630313   |
| MAP4K4     | 7.773436006 | 7.678203058 | 7.635786071 | 6.175143151  | 7.015936673 | 8.126656671 | 7.858266878 | 8.06135195  | 7.848235039 | 7.461560785 | 7.545075266 | 7.751265353 | 6.479971554 | 6.905469852 | 8.479341684 | 8.548998176 | 7.79308823  | 7.788542147 |
| RANBP10    | 7.905487917 | 7.646286436 | 8.221629612 | 8.6221629612 | 7.531904578 | 7.481711768 | 8.202778016 | 7.937013635 | 7.490346993 | 7.811391635 | 8.003004707 | 7.735139522 | 6.495174387 | 6.117818557 | 7.788482136 | 7.693142378 | 8.108553876 | 7.675434376 |
| MTERF3     | 7.610430729 | 7.965981035 | 8.29496964  | 7.610430729  | 7.610430729 | 8.332366387 | 8.087618738 | 7.452914718 | 7.558949446 | 7.804329411 | 7.403100356 | 8.332366387 | 8.9746534   | 9.040172525 | 7.235533566 | 7.856724584 | 7.18472789  | 7.666750591 |
| ACSM3      | 8.048544038 | 8.23222542  | 7.725991518 | 8.006454795  | 8.029460659 | 8.029461684 | 7.484123812 | 7.43300237  | 7.64228286  | 7.64228286  | 7.472148078 | 7.940246488 | 7.821695389 | 7.526304317 | 7.114494885 | 7.722132119 | 7.788785966 | 7.788785966 |
| JMUD7-PLA2 | 7.555558601 | 7.129923557 | 7.727967399 | 7.555558601  | 7.129923557 | 7.316803953 | 7.804631193 | 8.263035254 | 8.44848421  | 7.61349577  | 8.042376551 | 7.16336282  | 7.13442973  | 8.6790419   | 8.142660421 | 7.865099404 | 7.865099404 | 7.865099404 |
| BCAT2      | 7.728916238 | 7.282331273 | 7.66693611  | 7.728916238  | 7.66693611  | 7.483374983 | 8.19057223  | 7.741597308 | 7.716441833 | 7.809672445 | 7.761406372 | 7.96134528  | 8.002350261 | 7.256407772 | 7.54163831  | 7.765722397 | 7.84055049  | 7.358619001 |
| ACAT2      | 7.853567826 | 7.885163264 | 8.02882624  | 7.75582492   | 6.687572957 | 7.837908788 | 7.76447625  | 6.99285089  | 7.862041765 | 8.44533544  | 7.610636314 | 8.844513077 | 8.050140475 | 7.291632813 | 7.353259477 | 7.73434777  | 7.159480007 | 7.969936852 |
| GSCH       | 8.221751369 | 7.762054127 | 7.319328183 | 7.515485398  | 8.415357372 | 8.461606416 | 8.328083853 | 7.411570586 | 8.854231979 | 7.756325427 | 7.886667917 | 7.455141293 | 8.02331072  | 7.157824347 | 7.5908253   | 7.95183419  | 7.505574692 | 7.505574692 |
| GANC       | 7.051783903 | 7.051728967 | 7.671037696 | 7.051728967  | 7.671037696 | 7.46795105  | 7.627298864 | 7.774012892 | 7.46795105  | 8.052549478 | 7.632983071 | 7.89798653  | 8.46054436  | 8.200782432 | 7.87028063  | 7.74072719  | 8.011480305 | 7.652519239 |
| ARL17B     | 8.370563311 | 7.767128435 | 7.762306999 | 8.085601326  | 7.726306999 | 7.747517578 | 7.516958525 | 7.455809421 | 7.563716283 | 7.741847113 | 8.06442713  | 8.091421945 | 8.107659256 | 7.327367487 | 8.017865118 | 7.659691363 | 7.680570734 | 7.680570734 |
| ZNF830     | 7.203650018 | 7.767140252 | 7.927675208 | 7.85431032   | 6.764185899 | 7.95090468  | 8.090157915 | 7.835676301 | 7.918889832 | 7.610708038 | 7.59062561  | 8.06179588  | 8.201798133 | 6.193807558 | 7.668396703 | 7.714155591 | 7.54335367  | 7.923360396 |
| RCB2B      | 8.624165231 | 8.722442019 | 7.474503426 | 8.314104948  | 7.399420433 | 5.743974179 | 7.985371149 | 7.650297063 | 7.98411731  | 8.25649447  | 8.16148968  | 8.09119276  | 6.116532687 | 7.082934294 | 7.805579604 | 7.494915004 | 7.54335367  | 7.54335367  |
| UBR1       | 8.50295792  | 8.50295792  | 8.50295792  | 8.50295792   | 8.50295792  | 8.50295792  | 8.50295792  | 8.50295792  | 8.50295792  | 8.50295792  | 8.50295792  | 8.50295792  | 8.50295792  | 8.50295792  | 8.50295792  | 8.50295792  | 8.50295792  | 8.50295792  |
| TMEM51     | 8.982204031 | 8.684068906 | 8.982204031 | 8.982204031  | 8.982204031 | 8.982204031 | 8.982204031 | 8.982204031 | 8.982204031 | 8.982204031 | 8.982204031 | 8.982204031 | 8.982204031 | 8.982204031 | 8.982204031 | 8.982204031 | 8.982204031 | 8.982204031 |
| LTK        | 7.410292128 | 7.21198475  | 8.02763357  | 8.224849311  | 7.801782511 | 7.650090458 | 6.834034667 | 8.139399365 | 7.69935139  | 7.689490971 | 7.486231623 | 7.37002589  | 9.166962065 | 8.0382663   | 7.938774663 | 7.533446607 | 7.979607111 | 7.887660131 |
| VCL        | 7.805228075 | 7.631151135 | 7.617890661 | 6.537031264  | 7.871860662 | 7.679379853 | 7.968052115 | 7.679379853 | 7.968052115 | 7.896609465 | 7.54445633  | 6.55067645  | 6.226655545 | 8.377277671 | 7.76663896  | 7.74261153  | 7.76663896  | 7.76663896  |
| PHF14      | 7.501348894 | 7.772641118 | 7.938991796 | 7.915877716  | 7.736496816 | 7.383183751 | 8.23719226  | 7.810146448 | 7.645323433 | 7.607415676 | 7.650857263 | 7.728562774 | 7.852666059 | 7.783473625 | 7.457665644 | 7.552349785 | 7.940591816 | 7.576855557 |
| LMNB2      | 7.646622174 | 7.646622174 | 7.646622174 | 7.646622174  | 7.646622174 | 7.646622174 | 7.646622174 | 7.646622174 | 7.646622174 | 7.646622174 | 7.646622174 | 7.646622174 | 7.646622174 | 7.646622174 | 7.646622174 | 7.646622174 | 7.646622174 | 7.646622174 |
| SGSM2      | 6.884321682 | 6.884321682 | 6.884321682 | 6.884321682  | 6.884321682 | 6.884321682 | 6.884321682 | 6.884321682 | 6.884321682 | 6.884321682 | 6.884321682 | 6.884321682 | 6.884321682 | 6.884321682 | 6.884321682 | 6.884321682 | 6.884321682 | 6.884321682 |
| UBR6       | 7.464097677 | 8.245198411 | 8.255806712 | 7.464097677  | 8.245198411 | 8.255806712 | 7.464097677 | 8.245198411 | 8.255806712 | 7.464097677 | 8.245198411 | 8.255806712 | 7.464097677 | 8.245198411 | 8.255806712 | 7.464097677 | 8.245198411 | 8.255806712 |
| PP2R2B     | 8.331674033 | 8.331674033 | 8.331674033 | 8.331674033  | 8.331674033 | 8.331674033 | 8.331674033 | 8.331674033 | 8.331674033 | 8.331674033 | 8.331674033 | 8.331674033 | 8.331674033 | 8.331674033 | 8.331674033 | 8.331674033 | 8.331674033 | 8.331674033 |
| CASD1      | 6.827662323 | 6.789986286 | 6.789986286 | 6.827662323  | 6.789986286 | 6.827662323 | 6.789986286 | 6.827662323 | 6.789986286 | 6.827662323 | 6.789986286 | 6.827662323 | 6.789986286 | 6.827662323 | 6.789986286 | 6.827662323 | 6.789986286 | 6.827662323 |
| VHNAH      | 7.702007862 | 7.93456679  | 8.080187299 | 7.847547431  | 7.91458484  | 7.766297482 | 7.84624095  | 7.540992111 | 7.149388121 | 7.439287651 | 8.035794659 | 7.212053194 | 6.144103283 | 7.593085447 | 7.501794183 | 7.91864913  | 7.769542323 | 7.769542323 |
| EP812      | 8.003662153 | 7.756032162 | 8.106049616 | 7.516373269  | 7.913638128 | 7.864257315 | 7.721581938 | 7.517458889 | 7.68819963  | 7.744708981 | 7.379531768 | 7.915040067 | 7.597903783 | 8.066641538 | 7.625692152 | 7.2044273   | 7.827775601 | 8.181569234 |
| PNF2       | 7.889322123 | 8.129469878 | 8.470398301 | 7.889322123  | 8.129469878 | 8.470398301 | 7.889322123 | 8.129469878 | 8.470398301 | 7.889322123 | 8.129469878 | 8.470398301 | 7.889322123 | 8.129469878 | 8.470398301 | 7.889322123 | 8.129469878 | 8.470398301 |
| ILR8       | 7.966975123 | 6.162749009 | 8.18513996  | 8.09447356   | 7.284135872 | 7.489541198 | 8.305944048 | 8.426472496 | 7.609665809 | 7.88966756  | 8.75456046  | 7.608870804 | 6.986620305 | 6.313487501 | 8.359815484 | 7.565958988 | 7.371868004 | 8.167796077 |
| PURB       | 6.95293923  | 8.105707602 | 7.215717048 | 8.10647252   | 7.558330378 | 8.0194588   | 7.07726023  | 7.889762968 | 7.79632282  | 7.79632282  | 8.75632067  | 7.502325456 | 6.392318032 | 7.194369442 | 7.964794925 | 8.104899809 | 7.66166402  | 7.702978413 |
| PCP1       | 8.18295792  | 7.892793925 | 7.892793925 | 8.18295792   | 7.892793925 | 8.18295792  | 7.892793925 | 8.18295792  | 7.8927      |             |             |             |             |             |             |             |             |             |

|          |             |             |             |             |             |             |             |              |             |               |             |             |             |             |             |             |              |             |
|----------|-------------|-------------|-------------|-------------|-------------|-------------|-------------|--------------|-------------|---------------|-------------|-------------|-------------|-------------|-------------|-------------|--------------|-------------|
| RAPGE6   | 7.257052724 | 8.412391677 | 7.228626667 | 6.972859645 | 7.541523086 | 7.441132256 | 8.325471863 | 7.969729167  | 7.827425633 | 8.287330013   | 7.746683886 | 7.519975006 | 7.276624618 | 7.997368983 | 8.437800302 | 7.707871836 | 8.135739566  | 7.681860254 |
| VWASA    | 6.753819255 | 5.568015616 | 6.795026778 | 6.953640509 | 6.197796531 | 7.776338009 | 7.802446019 | 7.938277772  | 7.674496322 | 8.029376717   | 7.320028292 | 8.175106059 | 7.948074336 | 5.831531278 | 8.330763729 | 7.283817121 | 7.891825339  | 8.322878319 |
| ARHGEF18 | 7.931338988 | 7.363084588 | 7.326058096 | 7.286353395 | 8.227681116 | 7.905259629 | 7.790527948 | 7.654725794  | 7.533017062 | 7.60250086    | 7.494098244 | 7.997324353 | 7.800680337 | 7.699086155 | 7.905655261 | 7.663881445 | 7.641959766  | 7.752187798 |
| CONG1    | 7.527143888 | 7.112614995 | 7.39595976  | 7.955047317 | 7.731595432 | 8.232081635 | 7.872077265 | 7.599322467  | 7.487151198 | 7.753235852   | 8.344705891 | 7.04459397  | 7.718387151 | 6.720258802 | 7.394827184 | 8.339340902 | 8.1021911025 | 7.904322506 |
| SDAC3    | 7.698712047 | 7.91648838  | 7.887712247 | 7.887712247 | 7.73463154  | 7.61746674  | 7.73463154  | 7.61746674   | 7.48539046  | 7.730407707   | 7.62924428  | 7.83054504  | 8.13817016  | 8.00270579  | 7.482090442 | 7.57374876  | 7.76802569   | 7.6796849   |
| PLKZ     | 7.314262797 | 8.017623215 | 8.094895104 | 8.094895104 | 8.238836712 | 8.779906354 | 8.298282654 | 7.708521651  | 7.72108006  | 7.72108006    | 7.96251286  | 6.66126791  | 7.726637578 | 8.60685218  | 7.868661438 | 7.86265168  | 7.762617188  | 8.04177272  |
| TRIP6    | 8.038971378 | 8.065477347 | 7.358850485 | 8.134738142 | 8.663530887 | 8.273596108 | 8.035167268 | 7.373439682  | 7.653792117 | 7.589792704   | 7.565081213 | 8.218229018 | 7.407745953 | 8.401586334 | 7.72566131  | 7.723750457 | 7.352034103  | 7.957810531 |
| NORC2    | 7.142328284 | 6.994643414 | 7.629696447 | 7.629696447 | 7.444109263 | 8.05403875  | 8.05403875  | 8.05403875   | 8.145315725 | 8.145315725   | 7.65093694  | 6.859898913 | 7.122315452 | 6.671997875 | 7.931626551 | 7.921238766 | 7.798270776  | 7.916689894 |
| APBB1P   | 8.343210086 | 7.546244295 | 7.756733937 | 8.154083153 | 7.690701892 | 7.504109279 | 7.781902283 | 7.554462763  | 8.016513137 | 8.016513137   | 7.5655061   | 7.86042864  | 7.845720292 | 7.889950108 | 7.902782513 | 8.702002707 | 7.63215611   | 6.927746859 |
| DDA1     | 7.556234982 | 8.157026513 | 6.671345499 | 7.714540974 | 7.721495718 | 8.33938387  | 7.688290015 | 7.688290015  | 7.604406472 | 7.604406472   | 7.689878283 | 8.031342696 | 7.545881062 | 7.725036403 | 7.766503479 | 7.706881662 | 7.55646461   | 7.912179135 |
| COAS2    | 7.982704238 | 8.49390734  | 7.849390734 | 7.849390734 | 8.170112019 | 6.828558448 | 7.99029403  | 7.4644142354 | 7.870084355 | 7.870084355   | 7.620959322 | 7.445420138 | 7.923588959 | 7.444236002 | 7.731092776 | 7.699208602 | 7.646684825  | 7.646684825 |
| CSRN5    | 7.754849991 | 5.556924008 | 5.59316901  | 7.01375389  | 7.568391212 | 8.221499846 | 8.10392159  | 8.353047551  | 8.669905137 | 8.669905137   | 7.65264428  | 5.998678946 | 6.714903067 | 8.996995941 | 8.864282448 | 7.710610961 | 7.694251618  | 7.732210771 |
| DMAS1E11 | 8.60602132  | 7.444031268 | 7.664756608 | 8.057569528 | 8.04215628  | 8.033408344 | 7.77813241  | 7.583273287  | 7.62754866  | 7.62754866    | 8.12321494  | 6.162302353 | 6.238545643 | 7.524106417 | 7.409959784 | 5.81331263  | 7.797133902  |             |
| CHD      | 7.482487976 | 7.744325629 | 8.680164622 | 7.744325629 | 7.40993510  | 8.202212749 | 7.130265492 | 7.726739924  | 7.452369475 | 7.452369475   | 7.75536945  | 7.995359332 | 8.35807908  | 8.30647592  | 7.761571748 | 6.659957306 | 7.934163723  | 7.680527448 |
| ZDHC17   | 7.427491013 | 7.558703623 | 7.506179133 | 6.315746113 | 8.293421492 | 7.653753983 | 8.83110068  | 7.658872703  | 7.718810068 | 7.718810068   | 7.158584451 | 7.771886066 | 8.163179722 | 7.283111803 | 8.249278762 | 7.623462265 | 8.269703806  | 7.66654661  |
| EPAD0    | 7.688392833 | 7.684667234 | 8.245362228 | 7.757572632 | 7.530837173 | 7.7401702   | 8.244807337 | 7.988359944  | 7.774986724 | 7.774986724   | 7.646324909 | 7.146280772 | 7.173941652 | 7.696965575 | 7.59045207  | 7.863088604 | 8.355175553  | 7.684079586 |
| RPA41    | 7.57891218  | 8.207411387 | 7.274526786 | 8.11775995  | 6.92691648  | 7.878766526 | 7.743082487 | 7.70180373   | 7.73510002  | 7.73510002    | 7.361413473 | 6.663157647 | 6.881002678 | 8.015856849 | 7.314969631 | 8.096555044 | 7.54409749   |             |
| TP31NP2  | 8.217053963 | 6.199416365 | 7.472119288 | 7.807572566 | 7.547123708 | 7.219732667 | 7.62818054  | 8.024294255  | 7.841042028 | 7.841042028   | 8.291111217 | 7.683543137 | 6.881799109 | 7.916914889 | 8.265914842 | 7.502556268 | 7.35662333   | 7.786279372 |
| METL2A   | 7.725688991 | 7.825520772 | 8.184830984 | 7.901827278 | 7.49434316  | 7.457509262 | 6.019797759 | 7.786393755  | 7.546849275 | 7.546849275   | 7.34107364  | 7.954843628 | 7.946327583 | 7.144349223 | 7.704655931 | 7.569217001 | 7.802038881  | 7.706506336 |
| RPA3     | 7.834372545 | 8.552780762 | 7.657288027 | 7.071241126 | 7.530594465 | 7.955692856 | 8.85347163  | 7.71253809   | 7.332047623 | 7.332047623   | 7.613889226 | 7.875878905 | 8.46687193  | 7.126351012 | 7.807303648 | 7.581105444 | 7.847480954  | 7.6798649   |
| SC01     | 8.060921733 | 8.715706235 | 7.408569977 | 8.199592308 | 6.537467053 | 7.591110879 | 7.105142001 | 7.776101654  | 7.876914047 | 7.876914047   | 7.509516793 | 8.17325778  | 7.705010002 | 8.304362808 | 7.680650419 | 7.318950927 | 7.743027281  | 7.65919381  |
| COMMD9   | 7.842042062 | 8.425883653 | 8.156411048 | 7.572888306 | 7.525594919 | 7.748785378 | 7.10337618  | 7.224723882  | 7.700212117 | 7.700212117   | 7.478300725 | 7.859679532 | 8.237762382 | 7.903101913 | 7.665111565 | 7.405629736 | 7.67820643   | 7.791136038 |
| ZHK3     | 8.02293025  | 7.794650016 | 6.762780053 | 7.875012064 | 5.688394542 | 6.341838112 | 8.181009727 | 7.391156766  | 7.056451005 | 7.056451005   | 7.787852857 | 7.641931866 | 8.80908452  | 7.4334787   | 7.571051667 | 7.944503162 | 6.636506831  | 7.917153632 |
| ZNF26    | 8.015813152 | 7.801706922 | 8.381416104 | 7.730294345 | 7.767317235 | 7.30294345  | 7.692544932 | 7.371972225  | 7.142585373 | 7.142585373   | 7.948598557 | 7.29511528  | 7.743739918 | 7.107239354 | 5.539660037 | 7.496031737 | 7.496031737  | 8.059292397 |
| IPO8     | 7.599882062 | 6.656898181 | 7.414532051 | 7.55589466  | 8.524666998 | 7.617999113 | 8.082802891 | 8.025798865  | 8.13435482  | 8.13435482    | 7.915448799 | 7.630106208 | 6.697661797 | 6.89351262  | 7.52642723  | 8.2798538   | 8.15642773   | 7.984327605 |
| ZNF06    | 7.674266817 | 7.6772161   | 7.867177692 | 7.792543287 | 7.596093712 | 8.116208970 | 8.293414995 | 7.436401345  | 8.106114217 | 8.106114217   | 8.702340554 | 8.702340554 | 7.892982973 | 7.690556389 | 8.261388196 | 7.471362894 | 7.745458289  |             |
| MLL2E    | 7.666511691 | 7.175246624 | 7.966507402 | 7.400221527 | 7.548589597 | 7.685518041 | 7.717206203 | 8.340467956  | 7.565351614 | 7.565351614   | 7.70044898  | 7.72514829  | 7.511905311 | 8.013560537 | 8.175231001 | 8.837398989 | 8.661738244  | 7.631171969 |
| MEM1J5A  | 8.433278645 | 8.489479644 | 8.433278645 | 8.489479644 | 7.820211015 | 8.320211015 | 7.820211015 | 7.820211015  | 7.764172956 | 7.764172956   | 7.94482581  | 7.948598557 | 7.29511528  | 7.743739918 | 7.107239354 | 5.539660037 | 7.496031737  | 8.059292397 |
| GK5      | 7.499962624 | 8.560061022 | 7.487450879 | 9.080492833 | 8.112115908 | 9.080492833 | 6.562209993 | 8.350726824  | 7.089132214 | 7.089132214   | 7.405999424 | 6.426876286 | 8.241481485 | 8.478655415 | 8.352403726 | 7.09960825  | 8.29789008   | 8.452570359 |
| ERICH1   | 7.8482196   | 7.809163525 | 7.700224828 | 6.994690221 | 7.721587594 | 7.721587594 | 7.721587594 | 7.721587594  | 7.721587594 | 7.721587594   | 7.77067814  | 7.382815065 | 7.78758298  | 7.331808927 | 7.705908282 | 7.74935998  | 7.65693044   | 7.74935998  |
| MADL11   | 7.700224828 | 6.994690221 | 7.721587594 | 7.721587594 | 7.721587594 | 7.721587594 | 7.721587594 | 7.721587594  | 7.721587594 | 7.721587594   | 8.04193354  | 5.77520354  | 8.032239481 | 8.670849978 | 7.8331319   | 8.107780193 | 7.62426131   | 8.042106407 |
| SVTL3    | 7.711951855 | 6.063052943 | 7.645160955 | 7.093919444 | 7.499778303 | 8.66910712  | 7.523891234 | 7.66910712   | 7.709370304 | 7.709370304   | 7.611925782 | 8.129572063 | 8.210210174 | 8.3329293   | 8.381243054 | 8.203842138 | 7.943756303  | 8.004229685 |
| TUBR2A   | 6.957446841 | 8.261838881 | 5.53526206  | 6.529054614 | 7.464865515 | 9.13488413  | 7.340620024 | 8.806729647  | 8.780971136 | 8.780971136   | 8.110296859 | 6.796807509 | 7.839870996 | 7.580266376 | 8.995227889 | 9.320594817 | 7.33119377   | 9.874844443 |
| SC1Z5A26 | 7.481262877 | 8.407280594 | 8.592721077 | 8.232586833 | 8.452193474 | 8.957399202 | 7.57591763  | 8.070290901  | 7.960448554 | 7.960448554   | 8.345197349 | 8.17398789  | 7.56889317  | 7.767957304 | 7.621538807 | 7.521538807 | 7.521538807  | 7.68446826  |
| AGB15    | 8.016195974 | 8.510142789 | 8.121318957 | 8.306056008 | 7.572270027 | 7.492624566 | 6.998580304 | 5.869894721  | 7.818622762 | 7.818622762   | 7.884159215 | 6.65599274  | 7.80028382  | 5.98867641  | 7.146709733 | 8.767470723 | 7.83194263   | 7.638716193 |
| BCAP29   | 7.713391061 | 8.503525857 | 7.267767692 | 8.503525857 | 7.267767692 | 8.503525857 | 7.267767692 | 8.503525857  | 7.267767692 | 7.267767692   | 7.83358031  | 7.959789717 | 7.515896296 | 8.084137327 | 7.91933577  | 7.651418474 | 7.720208952  | 7.741150125 |
| HHDD3    | 8.09161908  | 7.999040888 | 8.00214448  | 8.03052327  | 6.487870076 | 7.55699555  | 7.741894182 | 7.458724439  | 8.84867228  | 8.84867228    | 7.671530952 | 8.022068764 | 5.989482708 | 7.332723488 | 7.326352965 | 7.600614497 | 7.635735717  | 8.29046674  |
| PPA11    | 7.56883119  | 8.009823624 | 6.441077426 | 8.009823624 | 6.376118051 | 7.787266051 | 8.047653146 | 7.956613954  | 7.84638871  | 7.84638871    | 8.01473765  | 8.352525102 | 8.338036707 | 8.003755093 | 7.442179832 | 7.481734209 | 7.49654676   | 8.008612781 |
| PHF6     | 7.635526864 | 6.302652094 | 7.377104966 | 8.169943781 | 8.108313021 | 7.393455181 | 7.98723354  | 7.70356434   | 7.711278838 | 7.711278838   | 8.12614359  | 8.660992513 | 6.479173172 | 7.696590726 | 8.18842926  | 7.680180306 | 7.78789792   | 7.676123367 |
| KPK3P1   | 7.371558281 | 7.631255973 | 7.991148783 | 7.791780886 | 7.763860277 | 7.973554744 | 7.892924381 | 7.873865249  | 8.008672201 | 8.008672201   | 7.81160369  | 7.57076814  | 6.145995324 | 8.06170464  | 7.740571445 | 8.006409726 | 7.12245501   | 7.832759997 |
| SC1Z5A26 | 7.481262877 | 8.407280594 | 8.592721077 | 8.232586833 | 8.452193474 | 8.957399202 | 7.57591763  | 8.070290901  | 7.960448554 | 7.960448554   | 8.345197349 | 8.17398789  | 7.56889317  | 7.767957304 | 7.621538807 | 7.521538807 | 7.521538807  | 7.68446826  |
| AGB15    | 8.016195974 | 8.510142789 | 8.121318957 | 8.306056008 | 7.572270027 | 7.492624566 | 6.998580304 | 5.869894721  | 7.818622762 | 7.818622762</ |             |             |             |             |             |             |              |             |



|         |             |              |             |             |             |             |             |             |             |             |             |             |             |             |             |             |             |             |
|---------|-------------|--------------|-------------|-------------|-------------|-------------|-------------|-------------|-------------|-------------|-------------|-------------|-------------|-------------|-------------|-------------|-------------|-------------|
| TEACNC  | 8.394889318 | 7.562359837  | 7.64684668  | 6.89512162  | 7.856986711 | 6.275330412 | 6.24412925  | 7.900886993 | 7.386744531 | 7.581581208 | 7.331123482 | 8.361857503 | 8.576023847 | 7.63564165  | 7.86207058  | 7.649140309 | 7.754902327 | 7.61758408  |
| ZNF346  | 8.196416654 | 8.886639107  | 7.77083584  | 8.075670324 | 7.600042421 | 5.734610602 | 7.688679031 | 7.231189826 | 7.283260444 | 7.557190521 | 7.36186255  | 7.650021172 | 7.800067006 | 7.779278015 | 7.917328365 | 7.766466352 | 7.629697705 | 7.380526104 |
| ILZ3A   | 7.204159487 | 7.231594904  | 8.04952398  |             |             |             | 5.90846613  | 8.561474329 | 6.725158214 | 8.193091708 | 8.055973836 | 6.641658879 | 8.380665785 | 7.780786008 | 7.802030092 | 8.308221073 | 7.422088509 | 7.956259244 |
| FAM7FB  | 7.104066698 | 7.506209971  | 7.285979212 | 6.829030144 | 6.775444102 | 6.689479498 | 7.695320123 | 7.758590646 | 7.706287673 | 7.808339919 | 7.453449186 | 7.850548412 | 7.710277854 | 7.574043234 | 7.886386377 | 7.866899348 | 7.650729538 | 7.847683794 |
| KCTD18  | 7.64102637  | 7.341758983  | 7.301758983 | 8.395638944 | 8.25389742  | 8.28503547  | 7.529419208 | 7.266299851 | 7.421098977 | 7.421098977 | 7.416135543 | 7.664071919 | 7.65144862  | 8.110865637 | 7.163121165 | 7.163121165 | 7.615271707 | 7.480875703 |
| ANKS3   | 8.313022847 | 7.586245152  | 7.362364656 | 7.362364656 | 7.362364656 | 7.362364656 | 7.362364656 | 7.362364656 | 7.362364656 | 7.362364656 | 7.362364656 | 7.362364656 | 7.362364656 | 7.362364656 | 7.362364656 | 7.362364656 | 7.362364656 | 7.362364656 |
| NEMP1   | 7.613896227 | 5.516384028  | 5.818532415 | 6.501580306 | 6.370094463 | 6.711593216 | 7.664209519 | 8.526566883 | 7.042655185 | 8.787684929 | 8.081357540 | 7.611877725 | 8.263330826 | 8.517766685 | 8.251610893 | 8.892043000 | 7.329412852 | 7.785238808 |
| RICB8   | 7.566962146 | 7.273586278  | 7.761261501 | 7.273586278 | 7.273586278 | 7.273586278 | 7.273586278 | 7.273586278 | 7.273586278 | 7.273586278 | 7.273586278 | 7.273586278 | 7.273586278 | 7.273586278 | 7.273586278 | 7.273586278 | 7.273586278 | 7.273586278 |
| DENN6GA | 8.656577027 | 9.183805793  | 7.336310832 | 7.123317919 | 7.664776134 | 8.13890314  | 7.611570027 | 7.16884991  | 7.302823392 | 7.802279261 | 7.403243487 | 6.937816322 | 8.666137586 | 7.577007848 | 7.931828935 | 7.200871169 | 7.934695803 | 6.645312269 |
| ZFP64   | 7.319177029 | 8.4877351215 | 5.469879092 | 7.319177029 | 7.319177029 | 7.319177029 | 7.319177029 | 7.319177029 | 7.319177029 | 7.319177029 | 7.319177029 | 7.319177029 | 7.319177029 | 7.319177029 | 7.319177029 | 7.319177029 | 7.319177029 | 7.319177029 |
| HEATR1  | 6.919887395 | 5.872534221  | 5.469879092 | 7.319177029 | 7.319177029 | 7.319177029 | 7.319177029 | 7.319177029 | 7.319177029 | 7.319177029 | 7.319177029 | 7.319177029 | 7.319177029 | 7.319177029 | 7.319177029 | 7.319177029 | 7.319177029 | 7.319177029 |
| MCM9    | 7.971877853 | 7.512066281  | 6.601804848 | 6.467006341 | 7.287109847 | 7.366426654 | 7.761547591 | 7.743535563 | 7.466936645 | 8.096575551 | 7.422603558 | 7.056663133 | 6.472152024 | 7.654280977 | 7.855637211 | 7.850947574 | 7.812601758 | 7.617055054 |
| TRIM37  | 6.8103016   | 7.808510802  | 7.90906711  | 7.498182729 | 7.498182729 | 7.498182729 | 7.498182729 | 7.498182729 | 7.498182729 | 7.498182729 | 7.498182729 | 7.498182729 | 7.498182729 | 7.498182729 | 7.498182729 | 7.498182729 | 7.498182729 | 7.498182729 |
| MGRN1   | 7.854045515 | 7.638517791  | 6.865095375 | 7.302823392 | 7.781216668 | 7.631405832 | 7.623541927 | 8.297907702 | 7.529484215 | 8.86911325  | 7.557828832 | 7.349343477 | 6.847260026 | 7.81042648  | 7.95023531  | 7.917236684 | 8.086411563 | 7.710659113 |
| LAIR1   | 8.454765171 | 8.283194625  | 8.391562815 | 7.816921194 | 7.618727608 | 8.09156781  | 6.030220779 | 8.061021355 | 6.977975463 | 7.629421421 | 7.745380975 | 5.965789939 | 5.971349489 | 6.110235213 | 7.765700589 | 7.62014562  | 7.639738479 | 7.543366881 |
| PPDR    | 7.911805143 | 7.143090944  | 8.506587675 | 7.442345422 | 6.555832463 | 7.126387262 | 8.127508473 | 8.406370127 | 8.412312084 | 7.958270308 | 7.685178154 | 5.88383668  | 6.600494721 | 7.12314089  | 8.437071827 | 8.221651282 | 7.887925364 | 7.381072455 |
| FBOX34  | 6.095305174 | 7.540823366  | 6.962386971 | 7.57709716  | 7.57709716  | 7.57709716  | 7.57709716  | 7.57709716  | 7.57709716  | 7.57709716  | 7.57709716  | 7.57709716  | 7.57709716  | 7.57709716  | 7.57709716  | 7.57709716  | 7.57709716  | 7.57709716  |
| ZNF780A | 8.702976539 | 7.889770752  | 8.124689313 | 7.882504303 | 7.485453482 | 7.69602343  | 7.678059434 | 7.642118887 | 7.474327804 | 7.638119697 | 7.64290871  | 7.62945338  | 6.594898343 | 7.053463617 | 7.40111114  | 7.368323592 | 7.457414766 | 7.345331896 |
| ZNF474  | 7.403746663 | 7.924440218  | 7.762971181 | 7.825886712 | 7.967147378 | 7.645864283 | 7.814242977 | 7.214935294 | 7.645864283 | 7.814242977 | 7.480354078 | 7.621616112 | 7.110213374 | 7.324055947 | 7.270684559 | 7.456923889 | 7.789219174 | 7.574569963 |
| LD4A    | 8.011792474 | 7.29315211   | 7.387675043 | 7.699596729 | 7.140079672 | 8.042116623 | 7.684034353 | 7.598987877 | 7.498977746 | 7.137784692 | 7.165984169 | 7.440373351 | 8.180902469 | 8.46222858  | 7.415705002 | 7.667347186 | 7.675220177 | 7.661847073 |
| HAML2   | 8.072835904 | 7.213745485  | 7.148790585 | 8.371717648 | 6.388998273 | 5.812576039 | 6.414066462 | 7.247173476 | 8.050747762 | 7.533642614 | 8.052119968 | 7.911155889 | 5.528892922 | 6.479821376 | 7.840055915 | 7.998979708 | 7.708166048 | 7.893232767 |
| SPIN1   | 7.744167192 | 8.051533842  | 8.051533842 | 7.711059292 | 7.97750919  | 7.529015823 | 6.689178365 | 7.403901679 | 7.683458776 | 7.675186169 | 7.675186169 | 7.675186169 | 7.675186169 | 7.675186169 | 7.675186169 | 7.675186169 | 7.675186169 | 7.675186169 |
| WDR47   | 6.145150718 | 5.989259913  | 6.969724137 | 8.065891698 | 6.133705802 | 8.046787316 | 6.967494411 | 7.654437243 | 7.95479967  | 7.630251632 | 8.09857204  | 7.34982938  | 7.110273843 | 6.34876495  | 7.645202369 | 7.909015103 | 7.632400791 | 7.788898932 |
| PIGN    | 6.080115068 | 7.760307127  | 7.746205174 | 6.114413386 | 7.225661182 | 7.134847958 | 6.447307865 | 7.626192598 | 7.798085997 | 7.63523165  | 8.233772841 | 7.415445819 | 6.32879195  | 6.31563873  | 7.635462536 | 7.267591304 | 7.862983441 | 7.887809641 |
| DCAF1   | 7.290183734 | 7.505039885  | 8.177249318 | 7.975096648 | 7.040784099 | 7.461415473 | 7.370760257 | 8.107240697 | 7.502725578 | 7.848650308 | 8.16561534  | 7.226027088 | 7.28699175  | 7.784257318 | 8.113400999 | 7.756440245 | 7.866141318 | 7.75339664  |
| ASB6    | 6.957956983 | 7.573977146  | 7.3695486   | 7.3695486   | 7.3695486   | 7.3695486   | 7.3695486   | 7.3695486   | 7.3695486   | 7.3695486   | 7.3695486   | 7.3695486   | 7.3695486   | 7.3695486   | 7.3695486   | 7.3695486   | 7.3695486   | 7.3695486   |
| GFZ1RD2 | 7.85502425  | 8.109989347  | 7.28851448  | 7.75463255  | 7.74430488  | 7.512393009 | 8.026806727 | 7.37596137  | 7.37596137  | 7.615424537 | 7.611904353 | 7.24062166  | 7.85424083  | 7.20020492  | 7.4246678   | 7.361561505 | 7.826390053 | 7.44523437  |
| GT2     | 7.371363922 | 6.82513654   | 7.371363922 | 7.371363922 | 7.371363922 | 7.371363922 | 7.371363922 | 7.371363922 | 7.371363922 | 7.371363922 | 7.371363922 | 7.371363922 | 7.371363922 | 7.371363922 | 7.371363922 | 7.371363922 | 7.371363922 | 7.371363922 |
| GP12    | 6.795035477 | 7.4471891    | 6.147002443 | 7.86282758  | 7.3555227   | 7.863657986 | 7.848633167 | 7.63747122  | 7.788720266 | 7.756556301 | 7.410882925 | 7.26024808  | 7.582352111 | 7.221445299 | 7.75130221  | 7.89028055  | 7.619789038 | 7.955939386 |
| DDX20   | 7.120968017 | 8.34797707   | 7.889938758 | 7.638802654 | 7.12765421  | 7.721637332 | 8.057777049 | 7.550964933 | 7.506268874 | 7.41251121  | 7.187355905 | 7.88530188  | 8.181070392 | 7.09828335  | 7.70645207  | 7.952715716 | 7.390255874 | 7.760586877 |
| SKP2    | 7.971874876 | 7.871867474  | 7.494824853 | 8.577397178 | 7.720195103 | 7.168100141 | 8.004262183 | 7.738035404 | 7.551373984 | 7.601466105 | 7.677886741 | 7.604204307 | 7.673017716 | 7.646997008 | 7.742435614 | 7.538923285 | 7.488711588 | 7.880160606 |
| ESR1    | 7.946797974 | 7.023361955  | 7.719645997 | 7.818286684 | 7.599624477 | 5.74337477  | 8.276963009 | 7.921377314 | 7.701187166 | 7.407739648 | 7.933284715 | 6.73164244  | 6.46577798  | 7.700500281 | 7.830094599 | 7.580270191 | 7.651548232 | 6.937526918 |
| ANKRD49 | 8.011485713 | 8.05852722   | 7.121439221 | 7.73022377  | 5.936146543 | 7.912551848 | 7.402955157 | 7.591510991 | 5.36845205  | 7.698859232 | 7.720034396 | 7.25028055  | 7.693661041 | 7.508889849 | 7.462032573 | 7.658872033 | 8.105116283 | 7.915716683 |
| AP0EBCF | 7.092923355 | 7.729642217  | 7.661358778 | 6.962816527 | 7.562460746 | 7.979594864 | 6.390405435 | 7.73066544  | 7.709249687 | 7.72603756  | 7.588722017 | 7.664769234 | 8.198731206 | 6.688928151 | 7.674149272 | 7.273188601 | 7.57966601  | 7.688843177 |
| KCTD19  | 6.985582809 | 7.980756413  | 6.82513654  | 7.72511229  | 7.55073953  | 7.5815578   | 6.911296128 | 7.5815578   | 6.911296128 | 7.5815578   | 7.5815578   | 7.5815578   | 7.5815578   | 7.5815578   | 7.5815578   | 7.5815578   | 7.5815578   | 7.5815578   |
| ZNF50D  | 7.568653174 | 7.87517373   | 8.795234639 | 8.795234639 | 8.795234639 | 8.795234639 | 8.795234639 | 8.795234639 | 8.795234639 | 8.795234639 | 8.795234639 | 8.795234639 | 8.795234639 | 8.795234639 | 8.795234639 | 8.795234639 | 8.795234639 | 8.795234639 |
| IMP5E   | 7.712706777 | 6.969375433  | 7.237781589 | 7.817743895 | 8.6201248   | 8.006017528 | 7.594496392 | 7.561614764 | 7.713452181 | 7.767383811 | 7.51122657  | 7.2282226   | 8.356464106 | 8.115583298 | 7.854669699 | 7.421539706 | 7.586439039 | 7.653682306 |
| TPP2    | 7.356716761 | 7.997888922  | 7.997888922 | 7.122484739 | 7.625121189 | 7.787373402 | 7.787373402 | 7.787373402 | 7.787373402 | 7.787373402 | 7.787373402 | 7.787373402 | 7.787373402 | 7.787373402 | 7.787373402 | 7.787373402 | 7.787373402 | 7.787373402 |
| IP04    | 7.992288853 | 7.312718464  | 7.812908653 | 6.307561032 | 6.08736776  | 7.804131601 | 7.250204186 | 7.477659352 | 7.47766534  | 7.845549911 | 7.450831798 | 8.185816842 | 5.70382404  | 8.550373231 | 7.782115041 | 7.516215471 | 7.843034677 | 7.731782149 |
| EEF2K   | 7.060558172 | 7.505814042  | 7.482945543 | 7.060558172 | 7.060558172 | 7.060558172 | 7.060558172 | 7.060558172 | 7.060558172 | 7.060558172 | 7.060558172 | 7.060558172 | 7.060558172 | 7.060558172 | 7.060558172 | 7.060558172 | 7.060558172 | 7.060558172 |
| PGBD2   | 8.448029351 | 8.259036116  | 8.747760072 | 7.560133383 | 7.699714945 | 5.804673999 | 8.525389748 | 7.669592199 | 7.565790916 | 7.313232523 | 7.46546256  | 7.862804714 | 8.367187229 | 6.620425821 | 7.680545021 | 7.972753074 | 7.547389794 | 6.672346542 |
| AN09    | 7.727387361 | 7.238677613  | 8.018295836 | 6.984071451 | 6.843845033 | 7.202903596 | 7.476761029 | 7.169779905 | 7.75039748  | 7.68089748  | 7.856251165 | 8.312       |             |             |             |             |             |             |

|          |              |              |             |              |              |              |              |              |              |              |              |              |              |              |              |              |              |              |
|----------|--------------|--------------|-------------|--------------|--------------|--------------|--------------|--------------|--------------|--------------|--------------|--------------|--------------|--------------|--------------|--------------|--------------|--------------|
| IFR80    | 7.116744815  | 7.858448231  | 7.598750593 | 7.696488544  | 8.198407806  | 7.832499336  | 7.213475736  | 7.456327227  | 7.256856852  | 7.578066316  | 7.315775919  | 7.685043879  | 7.596592392  | 6.446645068  | 7.595920388  | 7.823167634  | 7.623660146  | 7.738233631  |
| CBL      | 7.873743745  | 6.192739149  | 8.237782763 | 6.061443737  | 6.905248554  | 7.577625234  | 7.592830008  | 7.601046943  | 7.820175704  | 6.05494264   | 7.856727098  | 7.360100107  | 7.300609424  | 8.028281445  | 7.567241548  | 7.899948266  | 6.186188374  | 7.120060697  |
| FRKP     | 7.945545305  | 7.816010124  | 7.014055582 | 7.392985126  | 7.48004448   | 7.40574547   | 7.709126265  | 7.776560987  | 7.778429648  | 6.849938208  | 7.538475506  | 7.727962481  | 7.437951627  | 7.183457905  | 7.819209563  | 7.609729952  | 7.394050532  |              |
| HCCF1    | 7.6381813803 | 8.070256179  | 6.986439996 | 6.976380215  | 7.10264418   | 7.713254888  | 7.13045686   | 7.699647079  | 7.505744537  | 7.719088488  | 7.729027583  | 7.753215064  | 6.713763145  | 8.623813683  | 7.437008989  | 7.556192613  | 7.720968616  | 7.399793776  |
| UCFL     | 6.833714966  | 6.142346647  | 6.56374606  | 7.651455443  | 8.07047581   | 8.21911701   | 7.989215758  | 7.55046877   | 7.831101485  | 7.421984336  | 7.334398813  | 7.289450805  | 7.556644232  | 7.568612248  | 7.324415248  | 7.314147091  | 7.61111863   | 7.431111863  |
| SPIN2B   | 7.770710621  | 8.02829536   | 7.700711125 | 7.678320025  | 7.278789853  | 7.115852824  | 7.115852824  | 7.681343147  | 7.550567787  | 7.486312027  | 7.605200375  | 7.261971121  | 7.771604369  | 6.939564420  | 7.639435909  | 7.233550509  | 7.699696744  | 7.655385846  |
| UTP23    | 8.080661488  | 7.097100878  | 7.092152067 | 7.408837366  | 7.511382862  | 7.597709829  | 8.082797598  | 7.641728288  | 7.662154101  | 7.591855248  | 7.488326797  | 7.10880063   | 7.956724992  | 8.400037592  | 7.406068854  | 7.451039516  | 7.55568166   | 7.763194684  |
| DNAI13   | 7.328041281  | 7.596601024  | 5.916636846 | 8.254520299  | 8.051358264  | 6.436770789  | 7.592588922  | 7.871431464  | 7.603637394  | 7.748162248  | 7.854710796  | 7.923136394  | 6.912458314  | 7.588713058  | 7.460560436  | 7.537633146  | 7.789098717  |              |
| GATA2B   | 7.074141603  | 8.584813687  | 7.799012516 | 6.954279835  | 7.350572391  | 8.155428121  | 7.348465784  | 7.602142093  | 7.346604109  | 8.85787712   | 7.48663068   | 6.62546143   | 7.750604183  | 7.5862407    | 7.987412844  | 8.789039835  | 7.8057290519 | 7.46265109   |
| PHL3     | 8.100582994  | 8.046111203  | 6.565897448 | 7.336242959  | 7.435279911  | 7.025738991  | 7.407575034  | 7.565848584  | 7.832873499  | 7.779197622  | 7.543225528  | 7.749891711  | 7.626621046  | 7.102628508  | 7.444038267  | 7.829740244  | 7.724195156  |              |
| MOCS2    | 7.098508846  | 7.823549986  | 6.956796901 | 7.884221867  | 8.123859126  | 7.081272016  | 6.624486138  | 7.638935956  | 7.526200436  | 7.353833629  | 7.949155318  | 8.303936887  | 8.190731718  | 8.024274819  | 7.351460886  | 7.730719631  | 7.694400151  | 8.157322556  |
| CACTN    | 7.600752887  | 7.928939318  | 7.203939737 | 8.24926986   | 7.802348427  | 7.783841278  | 8.22270342   | 7.335563382  | 7.755278503  | 7.338661795  | 7.86683462   | 6.298486331  | 7.575800473  | 7.685744591  | 7.39540432   | 7.778316247  | 7.539446672  | 7.136782302  |
| WDR69    | 7.650958957  | 7.676234086  | 7.608498779 | 7.901925027  | 7.901925027  | 7.901925027  | 7.901925027  | 7.901925027  | 7.901925027  | 7.901925027  | 7.901925027  | 7.901925027  | 7.901925027  | 7.901925027  | 7.901925027  | 7.901925027  | 7.901925027  | 7.901925027  |
| NOL3     | 7.960312322  | 8.08502626   | 6.195056414 | 7.179803053  | 8.279580961  | 6.442090474  | 7.238740087  | 7.533736378  | 7.77963041   | 7.662123647  | 7.784734762  | 7.515687104  | 7.385143581  | 7.617311715  | 7.366820096  | 7.534558831  | 7.93492719   | 7.167918559  |
| LMK1     | 7.288031097  | 7.86378125   | 7.231614039 | 6.903057878  | 7.82780178   | 7.844005857  | 7.812601118  | 7.76442417   | 7.385789735  | 7.6442417    | 7.553530795  | 7.68175161   | 7.629601582  | 6.666646283  | 6.916813831  | 7.63267405   | 7.738112003  | 7.712326288  |
| MLLT10   | 7.54474918   | 7.398281734  | 8.184968819 | 7.029038656  | 7.345834586  | 7.6385434    | 8.062317903  | 7.678764219  | 7.555413327  | 7.703289381  | 7.577592129  | 7.152888582  | 7.751511669  | 7.08594956   | 7.605316235  | 7.804117774  | 7.850484406  | 7.36914714   |
| SHROOM1  | 7.516527059  | 7.6122072823 | 8.031160756 | 7.6122072823 | 7.6122072823 | 7.6122072823 | 7.6122072823 | 7.6122072823 | 7.6122072823 | 7.6122072823 | 7.6122072823 | 7.6122072823 | 7.6122072823 | 7.6122072823 | 7.6122072823 | 7.6122072823 | 7.6122072823 | 7.6122072823 |
| BTBD10   | 7.642906368  | 7.618373555  | 7.737343892 | 7.861029167  | 6.68091377   | 6.069930217  | 6.36787725   | 7.757198307  | 7.404204595  | 7.71166466   | 7.369021616  | 6.893893323  | 7.93738719   | 7.153447163  | 7.690546766  | 7.220930034  | 7.737194283  |              |
| SLC35D1  | 8.082355796  | 8.500430063  | 6.800244021 | 8.500430063  | 6.800244021  | 6.800244021  | 6.800244021  | 6.800244021  | 6.800244021  | 6.800244021  | 6.800244021  | 6.800244021  | 6.800244021  | 6.800244021  | 6.800244021  | 6.800244021  | 6.800244021  | 6.800244021  |
| PCB1     | 7.504563401  | 7.704634131  | 7.965076397 | 8.260609429  | 7.300485016  | 7.532122951  | 7.478497502  | 7.571912534  | 7.875063620  | 7.057269146  | 7.51854532   | 7.641754007  | 7.716128804  | 7.409762245  | 7.539632851  | 7.267818322  | 7.444832234  | 7.720491869  |
| GLT3     | 7.970306702  | 7.900224049  | 8.209991561 | 7.567428326  | 7.658031718  | 7.658031718  | 7.658031718  | 7.658031718  | 7.658031718  | 7.658031718  | 7.658031718  | 7.658031718  | 7.658031718  | 7.658031718  | 7.658031718  | 7.658031718  | 7.658031718  | 7.658031718  |
| QXND1    | 7.458720094  | 7.503737744  | 8.078655091 | 8.268285795  | 7.983645419  | 7.739397425  | 7.739397425  | 7.739397425  | 7.739397425  | 7.739397425  | 7.739397425  | 7.739397425  | 7.739397425  | 7.739397425  | 7.739397425  | 7.739397425  | 7.739397425  | 7.739397425  |
| USP53    | 7.624212307  | 7.643370691  | 7.577303603 | 7.281417101  | 7.546782111  | 7.730817663  | 7.342748939  | 7.848694883  | 7.766272947  | 7.414463714  | 7.948291969  | 8.091360489  | 7.506092315  | 7.146841086  | 7.600959917  | 7.534208249  | 7.458832064  | 7.65794801   |
| SLC12A9  | 7.725454608  | 7.579717717  | 6.729791309 | 7.725454608  | 7.579717717  | 7.579717717  | 7.579717717  | 7.579717717  | 7.579717717  | 7.579717717  | 7.579717717  | 7.579717717  | 7.579717717  | 7.579717717  | 7.579717717  | 7.579717717  | 7.579717717  | 7.579717717  |
| ZNF70    | 7.613579067  | 6.126113143  | 7.979272269 | 6.450648237  | 6.9981091    | 7.580014327  | 6.292974529  | 8.020210443  | 7.889747618  | 7.889747618  | 7.889747618  | 7.889747618  | 7.889747618  | 7.889747618  | 7.889747618  | 7.889747618  | 7.889747618  | 7.889747618  |
| C12orf10 | 7.31719067   | 7.69374448   | 7.39695988  | 7.69374448   | 7.39695988   | 7.69374448   | 7.69374448   | 7.69374448   | 7.69374448   | 7.69374448   | 7.69374448   | 7.69374448   | 7.69374448   | 7.69374448   | 7.69374448   | 7.69374448   | 7.69374448   | 7.69374448   |
| MRP2     | 7.389393564  | 8.031464725  | 7.889159582 | 8.244130065  | 7.889159582  | 8.244130065  | 8.244130065  | 8.244130065  | 8.244130065  | 8.244130065  | 8.244130065  | 8.244130065  | 8.244130065  | 8.244130065  | 8.244130065  | 8.244130065  | 8.244130065  | 8.244130065  |
| AMP4     | 7.330362448  | 7.830362448  | 7.830362448 | 7.830362448  | 7.830362448  | 7.830362448  | 7.830362448  | 7.830362448  | 7.830362448  | 7.830362448  | 7.830362448  | 7.830362448  | 7.830362448  | 7.830362448  | 7.830362448  | 7.830362448  | 7.830362448  | 7.830362448  |
| ARM2     | 7.075762364  | 6.510626241  | 7.95122162  | 7.904135621  | 7.904135621  | 7.904135621  | 7.904135621  | 7.904135621  | 7.904135621  | 7.904135621  | 7.904135621  | 7.904135621  | 7.904135621  | 7.904135621  | 7.904135621  | 7.904135621  | 7.904135621  | 7.904135621  |
| CACFD1   | 7.849342478  | 7.798322203  | 8.426981822 | 7.505745536  | 7.768717012  | 7.567850603  | 8.336262002  | 7.498579514  | 7.517950476  | 7.460515747  | 7.723649366  | 7.469949853  | 8.644048057  | 7.714873574  | 7.319294314  | 7.577267524  | 7.46803589   | 7.423225207  |
| AMZ8     | 7.809548276  | 7.070441822  | 8.489528721 | 8.789518876  | 7.070441822  | 7.070441822  | 7.070441822  | 7.070441822  | 7.070441822  | 7.070441822  | 7.070441822  | 7.070441822  | 7.070441822  | 7.070441822  | 7.070441822  | 7.070441822  | 7.070441822  | 7.070441822  |
| ST7L     | 7.434957394  | 8.06001389   | 7.65959602  | 7.384235687  | 7.240431878  | 7.347846022  | 6.834572425  | 7.742881298  | 7.742881298  | 7.742881298  | 7.742881298  | 7.742881298  | 7.742881298  | 7.742881298  | 7.742881298  | 7.742881298  | 7.742881298  | 7.742881298  |
| DDX58    | 7.428629159  | 7.974989597  | 6.989345119 | 7.974989597  | 6.989345119  | 6.989345119  | 6.989345119  | 6.989345119  | 6.989345119  | 6.989345119  | 6.989345119  | 6.989345119  | 6.989345119  | 6.989345119  | 6.989345119  | 6.989345119  | 6.989345119  | 6.989345119  |
| COX19    | 7.187836447  | 7.921037711  | 7.740535626 | 8.194130638  | 7.66846073   | 7.381980456  | 7.626615312  | 7.5441238    | 7.396053052  | 7.29548256   | 7.522314263  | 7.792265839  | 7.444927586  | 7.360174397  | 7.633711547  | 7.482655303  | 7.999156793  | 7.886891501  |
| TRHML    | 7.180892919  | 7.593562919  | 8.035529138 | 8.463729726  | 7.572401406  | 7.572401406  | 7.572401406  | 7.572401406  | 7.572401406  | 7.572401406  | 7.572401406  | 7.572401406  | 7.572401406  | 7.572401406  | 7.572401406  | 7.572401406  | 7.572401406  | 7.572401406  |
| GLT3     | 7.340114307  | 7.340114307  | 7.340114307 | 7.340114307  | 7.340114307  | 7.340114307  | 7.340114307  | 7.340114307  | 7.340114307  | 7.340114307  | 7.340114307  | 7.340114307  | 7.340114307  | 7.340114307  | 7.340114307  | 7.340114307  | 7.340114307  | 7.340114307  |
| MP11     | 7.743547711  | 7.507037362  | 7.099045887 | 7.074647248  | 8.146677648  | 7.404486280  | 8.86725052   | 7.715990769  | 7.492191808  | 7.95376452   | 7.54792322   | 7.782718826  | 6.039876269  | 7.31478017   | 7.621420655  | 7.644889152  | 7.444721977  | 8.772208798  |
| THOC1    | 6.850638862  | 6.3162649    | 7.267344882 | 6.850638862  | 6.3162649    | 6.3162649    | 6.3162649    | 6.3162649    | 6.3162649    | 6.3162649    | 6.3162649    | 6.3162649    | 6.3162649    | 6.3162649    | 6.3162649    | 6.3162649    | 6.3162649    | 6.3162649    |
| UHRF1BP1 | 7.355114303  | 8.096055887  | 7.90551854  | 6.939405478  | 7.271565291  | 7.487647767  | 6.048070097  | 8.013621197  | 7.433131713  | 7.881285051  | 7.826832942  | 6.447965542  | 6.602091688  | 8.098834538  | 7.866867035  | 7.681765448  | 7.678796709  | 7.387378225  |
| LENG1    | 7.986409868  | 7.855230611  | 7.881861275 | 7.855230611  | 7.881861275  | 7.855230611  | 7.855230611  | 7.855230611  | 7.855230611  | 7.855230611  | 7.855230611  | 7.855230611  | 7.855230611  | 7.855230611  | 7.855230611  | 7.855230611  | 7.855230611  | 7.855230611  |
| TMEM68   | 7.623608988  | 7.669678616  | 7.762625835 | 7.623608988  | 7.669678616  | 7.623608988  | 7.623608988  | 7.623608988  | 7.623608988  | 7.623608988  | 7.623608988  | 7.623608988  | 7.623608988  | 7.623608988  | 7.623608988  | 7.623608988  | 7.623608988  | 7.623608988  |
| PRMT3    | 8.336067512  | 7.796494844  | 6.089547282 | 8.402376329  | 6.219720392  | 8.503922694  | 7.69992764   | 7.           |              |              |              |              |              |              |              |              |              |              |

|         |             |             |             |             |             |             |             |             |             |             |             |             |             |             |             |             |             |             |
|---------|-------------|-------------|-------------|-------------|-------------|-------------|-------------|-------------|-------------|-------------|-------------|-------------|-------------|-------------|-------------|-------------|-------------|-------------|
| MBP     | 6.026534768 | 6.737186367 | 8.603180024 | 7.564451005 | 7.183808265 | 7.0131752   | 7.227461703 | 7.798944668 | 7.936555102 | 7.775025833 | 7.71699555  | 6.97215665  | 6.473900932 | 6.84181841  | 7.682503229 | 8.005106651 | 7.547430102 | 7.635162814 |
| VGLL4   | 7.525743678 | 8.008786881 | 8.20874657  | 7.509845157 | 8.198212557 | 6.383504518 | 7.03816821  | 7.03816821  | 7.03816821  | 7.931872677 | 7.661982724 | 7.297853973 | 7.999527286 | 6.325465193 | 7.424019312 | 7.530871921 | 7.525255208 | 7.850940409 |
| TLXNG   | 6.98348594  | 7.39715662  | 7.586047328 | 6.98348594  | 7.082597243 | 7.082597243 | 7.082597243 | 7.082597243 | 7.082597243 | 7.082597243 | 7.082597243 | 7.082597243 | 7.082597243 | 7.082597243 | 7.082597243 | 7.082597243 | 7.082597243 | 7.082597243 |
| RAB35   | 7.362363679 | 7.81338666  | 7.77525202  | 8.001170058 | 7.932620569 | 7.863773231 | 7.932620569 | 7.863773231 | 7.932620569 | 7.863773231 | 7.932620569 | 7.863773231 | 7.932620569 | 7.863773231 | 7.932620569 | 7.863773231 | 7.932620569 | 7.863773231 |
| RPS1    | 6.710346192 | 7.39841958  | 7.39841958  | 7.39841958  | 7.39841958  | 7.39841958  | 7.39841958  | 7.39841958  | 7.39841958  | 7.39841958  | 7.39841958  | 7.39841958  | 7.39841958  | 7.39841958  | 7.39841958  | 7.39841958  | 7.39841958  | 7.39841958  |
| THG5    | 8.155323848 | 8.155323848 | 8.155323848 | 8.155323848 | 8.155323848 | 8.155323848 | 8.155323848 | 8.155323848 | 8.155323848 | 8.155323848 | 8.155323848 | 8.155323848 | 8.155323848 | 8.155323848 | 8.155323848 | 8.155323848 | 8.155323848 | 8.155323848 |
| KDMA031 | 6.53373482  | 7.732551044 | 6.034689603 | 6.40820493  | 7.439763138 | 6.949867526 | 7.439763138 | 6.949867526 | 7.439763138 | 6.949867526 | 7.439763138 | 6.949867526 | 7.439763138 | 6.949867526 | 7.439763138 | 6.949867526 | 7.439763138 | 6.949867526 |
| K10AA   | 6.952268683 | 7.565037648 | 6.952268683 | 7.565037648 | 6.952268683 | 7.565037648 | 6.952268683 | 7.565037648 | 6.952268683 | 7.565037648 | 6.952268683 | 7.565037648 | 6.952268683 | 7.565037648 | 6.952268683 | 7.565037648 | 6.952268683 | 7.565037648 |
| NIPP181 | 7.911298794 | 7.973979614 | 7.245733679 | 7.528677695 | 7.23593072  | 6.995220561 | 7.22738534  | 7.753268749 | 7.642001095 | 8.265333417 | 7.493644398 | 7.577009292 | 6.853664721 | 7.300740075 | 8.089282784 | 8.099884141 | 8.786581855 | 7.242515704 |
| HACD4   | 7.13119998  | 7.93992713  | 7.13119998  | 7.93992713  | 7.13119998  | 7.93992713  | 7.13119998  | 7.93992713  | 7.13119998  | 7.93992713  | 7.13119998  | 7.93992713  | 7.13119998  | 7.93992713  | 7.13119998  | 7.93992713  | 7.13119998  | 7.93992713  |
| MBP     | 7.784741098 | 7.994462415 | 8.157610603 | 7.79099157  | 7.774187168 | 6.652791116 | 7.036299214 | 7.014244742 | 7.763878654 | 7.322512521 | 7.049800613 | 8.206663422 | 7.405350904 | 8.256285254 | 7.405350904 | 6.652457927 | 7.441973752 | 7.79099157  |
| FXK08   | 8.110889847 | 7.819745673 | 7.210928263 | 7.764014338 | 7.003705228 | 7.851633562 | 7.417136976 | 7.294089898 | 7.221401129 | 7.154674172 | 7.334517699 | 7.779144122 | 7.782584203 | 7.250268002 | 7.860079774 | 7.727384857 | 6.968639116 | 7.761306416 |
| DKX2    | 7.95322065  | 8.18151792  | 7.484645806 | 5.69409774  | 5.584519199 | 6.663999464 | 7.75455121  | 7.80074605  | 7.276793267 | 8.111051243 | 6.056696319 | 7.846020211 | 7.112388051 | 7.516900557 | 7.921210158 | 8.427967676 |             |             |
| FARS2   | 7.795120852 | 8.332077617 | 7.54313259  | 7.504284272 | 8.008995575 | 7.094305714 | 7.365191694 | 7.921896882 | 7.817890515 | 7.509701682 | 7.447121489 | 6.941093925 | 7.236853031 | 8.054806511 | 7.322516852 | 7.665022981 | 7.556795459 | 7.728539392 |
| ELAC1   | 8.930281398 | 7.77026897  | 7.77026897  | 7.77026897  | 7.77026897  | 7.77026897  | 7.77026897  | 7.77026897  | 7.77026897  | 7.77026897  | 7.77026897  | 7.77026897  | 7.77026897  | 7.77026897  | 7.77026897  | 7.77026897  | 7.77026897  | 7.77026897  |
| XVLT2   | 7.755487254 | 8.351029181 | 7.520268171 | 7.26782563  | 6.626153041 | 6.763226248 | 7.444609356 | 7.849055704 | 7.852449236 | 7.395780505 | 7.780975381 | 7.777442521 | 6.359506929 | 7.168526371 | 7.746847568 | 7.315770382 | 7.016056989 | 7.899696878 |
| AKNA    | 7.568926756 | 7.374829732 | 7.069760312 | 7.568926756 | 7.374829732 | 7.069760312 | 7.568926756 | 7.374829732 | 7.069760312 | 7.568926756 | 7.374829732 | 7.069760312 | 7.568926756 | 7.374829732 | 7.069760312 | 7.568926756 | 7.374829732 | 7.069760312 |
| NRARP   | 7.026424823 | 7.160468832 | 6.849124329 | 7.221742355 | 7.26504422  | 8.241959919 | 7.551688545 | 8.232782823 | 8.077592029 | 7.60682952  | 7.754766261 | 7.545873993 | 7.372540474 | 6.853483473 | 8.416986268 | 8.055375633 | 7.031346626 | 7.305447725 |
| OSBP11  | 7.03862478  | 7.211158137 | 7.044626009 | 8.350108497 | 7.935021291 | 8.228577337 | 8.757997722 | 7.845063407 | 7.826839464 | 7.227570124 | 7.434990323 | 7.445727487 | 8.081823408 | 7.215444178 | 7.651597151 | 7.166702253 | 8.435141319 |             |
| CPD10   | 7.460121369 | 8.120178311 | 7.561297963 | 7.460121369 | 8.120178311 | 7.561297963 | 7.460121369 | 8.120178311 | 7.561297963 | 7.460121369 | 8.120178311 | 7.561297963 | 7.460121369 | 8.120178311 | 7.561297963 | 7.460121369 | 8.120178311 | 7.561297963 |
| PATL2   | 8.083177992 | 6.415248928 | 7.170344162 | 7.170344162 | 7.170344162 | 7.170344162 | 7.170344162 | 7.170344162 | 7.170344162 | 7.170344162 | 7.170344162 | 7.170344162 | 7.170344162 | 7.170344162 | 7.170344162 | 7.170344162 | 7.170344162 | 7.170344162 |
| QSL1    | 7.872213561 | 6.903707129 | 7.842479617 | 7.800183979 | 7.606351958 | 7.534651146 | 7.138689578 | 7.281963846 | 7.690460660 | 7.612389939 | 7.313946285 | 7.180419524 | 7.494321211 | 7.615900768 | 7.484378477 | 7.566884174 | 8.351695793 |             |
| PXKNX3  | 7.893807818 | 6.637426714 | 5.90371081  | 7.378288482 | 7.166766171 | 6.860875999 | 6.515832351 | 8.580941828 | 7.598475358 | 7.893614635 | 8.205898182 | 8.445291526 | 7.496839062 | 6.314364825 | 8.188424734 | 7.131718693 | 7.926963873 | 7.294386369 |
| IKKE    | 7.521048272 | 7.627213349 | 5.67234551  | 7.521048272 | 7.627213349 | 5.67234551  | 7.521048272 | 7.627213349 | 5.67234551  | 7.521048272 | 7.627213349 | 5.67234551  | 7.521048272 | 7.627213349 | 5.67234551  | 7.521048272 | 7.627213349 | 5.67234551  |
| TRAF6   | 6.805865766 | 7.006351456 | 8.907611908 | 6.805865766 | 7.006351456 | 8.907611908 | 6.805865766 | 7.006351456 | 8.907611908 | 6.805865766 | 7.006351456 | 8.907611908 | 6.805865766 | 7.006351456 | 8.907611908 | 6.805865766 | 7.006351456 | 8.907611908 |
| ZCHC9   | 8.598485966 | 7.308532279 | 7.340874122 | 8.263549122 | 7.292737329 | 7.274458225 | 7.836427768 | 7.410668896 | 7.552457161 | 7.591609314 | 8.429209283 | 6.687724483 | 8.392113546 | 7.454138274 | 7.892975332 | 7.624184382 | 8.298153116 |             |
| PARD08  | 7.979256151 | 8.123478978 | 7.215709986 | 7.484703651 | 7.922400669 | 7.331174026 | 7.911177799 | 7.399202857 | 7.360053528 | 7.086191089 | 7.636727391 | 7.292762016 | 7.014923297 | 6.698906461 | 7.178333631 | 7.696208777 | 8.285001012 |             |
| APJ1    | 8.03913026  | 8.103194562 | 7.085189338 | 7.141558032 | 7.471559833 | 7.433595424 | 7.324393461 | 7.141558032 | 7.471559833 | 7.433595424 | 7.324393461 | 7.141558032 | 7.471559833 | 7.433595424 | 7.324393461 | 7.141558032 | 7.471559833 | 7.433595424 |
| ALD0C   | 7.613353638 | 8.027878026 | 7.613353638 | 8.027878026 | 7.613353638 | 8.027878026 | 7.613353638 | 8.027878026 | 7.613353638 | 8.027878026 | 7.613353638 | 8.027878026 | 7.613353638 | 8.027878026 | 7.613353638 | 8.027878026 | 7.613353638 | 8.027878026 |
| KMO     | 7.955508887 | 5.69900813  | 5.11211507  | 7.45339344  | 7.1153157   | 7.27685497  | 6.771177138 | 8.196486715 | 7.258785275 | 7.456965012 | 7.498039466 | 7.592292707 | 7.937254448 | 8.117188284 | 8.138151449 | 7.439294528 | 8.131047073 | 8.182825662 |
| MRLP19  | 7.35654296  | 7.488400112 | 7.556256937 | 6.479972732 | 6.839740111 | 7.745311795 | 7.820372036 | 7.222181774 | 7.279059214 | 7.531271771 | 7.682186957 | 7.665624917 | 6.036361815 | 8.167117487 | 7.531384343 | 7.52858437  | 7.369539053 | 8.118350681 |
| DZGH0   | 7.063808849 | 6.582573751 | 7.240870772 | 7.387324911 | 7.567534922 | 7.713862033 | 7.109500511 | 7.707304606 | 7.777044004 | 7.644996996 | 7.482323934 | 7.467016064 | 7.840215384 | 7.303940228 | 7.533912451 | 7.457112919 | 7.550266578 | 7.76472515  |
| USP37   | 7.06560737  | 7.96525156  | 7.982453198 | 7.06560737  | 7.96525156  | 7.982453198 | 7.06560737  | 7.96525156  | 7.982453198 | 7.06560737  | 7.96525156  | 7.982453198 | 7.06560737  | 7.96525156  | 7.982453198 | 7.06560737  | 7.96525156  | 7.982453198 |
| PKX     | 8.511019301 | 8.252018408 | 6.291874087 | 6.918243658 | 7.833659919 | 7.545225492 | 7.986053176 | 7.858600443 | 7.684281027 | 7.484774656 | 7.414408227 | 7.540019789 | 7.087295868 | 7.594227535 | 7.5423028   | 7.710208128 | 7.368535364 | 7.547700594 |
| APJ2    | 8.03913026  | 8.103194562 | 7.085189338 | 7.141558032 | 7.471559833 | 7.433595424 | 7.324393461 | 7.141558032 | 7.471559833 | 7.433595424 | 7.324393461 | 7.141558032 | 7.471559833 | 7.433595424 | 7.324393461 | 7.141558032 | 7.471559833 | 7.433595424 |
| ATF5    | 8.166100305 | 8.002756029 | 8.172223881 | 8.242657384 | 8.134729548 | 7.71371308  | 8.134729548 | 7.71371308  | 8.134729548 | 7.71371308  | 8.134729548 | 7.71371308  | 8.134729548 | 7.71371308  | 8.134729548 | 7.71371308  | 8.134729548 | 7.71371308  |
| EBL     | 7.186322465 | 7.127222473 | 7.277341849 | 6.938576619 | 7.623053832 | 7.979069984 | 7.891656376 | 7.42254573  | 7.728712637 | 7.365295167 | 7.367519777 | 7.490567309 | 7.791263527 | 8.094474231 | 7.288274256 | 7.58978722  | 7.690092753 | 7.609960348 |
| RPP25   | 8.151618672 | 7.685954574 | 7.625275669 | 7.452892901 | 8.29775618  | 6.687307082 | 7.46701815  | 7.710297953 | 7.46681173  | 7.710297953 | 7.46681173  | 7.710297953 | 7.46681173  | 7.710297953 | 7.46681173  | 7.710297953 | 7.46681173  | 7.710297953 |
| ACAC8   | 7.280153471 | 7.410272774 | 6.713193724 | 7.528067425 | 6.86301466  | 6.322600317 | 6.516355934 | 8.024465988 | 7.66628659  | 8.12866691  | 7.55633333  | 7.217059885 | 8.455315193 | 7.783737397 | 6.833805676 | 7.75525246  | 8.253449286 | 7.394647345 |
| CEP192  | 6.491769899 | 7.308391733 | 6.491769899 | 7.308391733 | 6.491769899 | 7.308391733 | 6.491769899 | 7.308391733 | 6.491769899 | 7.308391733 | 6.491769899 | 7.308391733 | 6.491769899 | 7.308391733 | 6.491769899 | 7.308391733 | 6.491769899 | 7.308391733 |
| MFSD10  | 8.094803379 | 7.981172556 | 7.981172556 | 7.981172556 | 7.981172556 | 7.981172556 | 7.981172556 | 7.981172556 | 7.981172556 | 7.981172556 | 7.981172556 | 7.981172556 | 7.981172556 | 7.981172556 | 7.981172556 | 7.981172556 | 7.981172556 | 7.981172556 |
| PTPN9   | 7.867465879 | 8.25987736  | 8.00207808  | 6.416155061 | 7.390352654 | 7.600295475 | 7.700295475 | 7.141136966 | 7.837682974 | 7.338657986 | 7.360098108 | 8.464668021 | 6.23471     |             |             |             |             |             |

|            |             |             |             |             |             |              |              |             |             |             |             |             |             |             |             |             |             |             |
|------------|-------------|-------------|-------------|-------------|-------------|--------------|--------------|-------------|-------------|-------------|-------------|-------------|-------------|-------------|-------------|-------------|-------------|-------------|
| ANKR40     | 7.19682633  | 7.290718701 | 8.067143577 | 7.802713539 | 6.986848553 | 7.26422631   | 7.517602076  | 7.651846902 | 7.570928911 | 7.872380035 | 7.599132944 | 7.261250885 | 7.438453821 | 6.369235762 | 7.519572309 | 7.606011667 | 7.479526803 | 7.701961988 |
| TUBAI      | 7.344076739 | 7.884799158 | 8.192012995 | 8.240319334 | 7.703585804 | 8.664975871  | 6.800135306  | 7.525483487 | 7.150194665 | 7.207756471 | 7.608336179 | 7.529061307 | 6.326026527 | 7.511601745 | 7.232252849 | 7.537172568 |             |             |
| DUKCA      | 7.633657939 | 8.058707642 | 7.175862124 | 7.175862124 | 7.67833654  | 6.030971404  | 7.993828425  | 7.537370693 | 7.304105115 | 7.799943329 | 7.007947681 | 7.499701605 | 7.968471177 | 6.048515834 | 7.2565251   | 7.977521334 | 7.631099775 | 7.35479114  |
| ABHD14A-1P | 7.56836794  | 7.524788734 | 7.250268631 | 7.861899201 | 7.32025543  | 7.844790883  | 7.830859915  | 7.217088877 | 7.331378929 | 7.535931551 | 7.510226404 | 7.001873627 | 7.983737839 | 8.390813979 | 7.007691596 | 7.281357245 | 7.496709673 | 7.807696753 |
| TCB        | 7.052514727 | 7.938997756 | 6.400620768 | 7.938997756 | 7.938997756 | 7.938997756  | 7.938997756  | 7.938997756 | 7.938997756 | 7.938997756 | 7.938997756 | 7.938997756 | 7.938997756 | 7.938997756 | 7.938997756 | 7.938997756 | 7.938997756 | 7.938997756 |
| MADL12B    | 7.316027287 | 7.619962616 | 7.924882527 | 7.316027287 | 7.316027287 | 7.316027287  | 7.316027287  | 7.316027287 | 7.316027287 | 7.316027287 | 7.316027287 | 7.316027287 | 7.316027287 | 7.316027287 | 7.316027287 | 7.316027287 | 7.316027287 | 7.316027287 |
| DOHH       | 8.261318418 | 8.190103515 | 7.961013738 | 7.589268642 | 8.061843317 | 7.401800291  | 8.1164758    | 7.376887622 | 7.681200085 | 7.44073216  | 7.253258639 | 7.344677933 | 5.699975019 | 8.16297866  | 6.720590493 | 7.251690929 | 7.41993763  | 7.608353557 |
| EXOSX      | 7.896353584 | 7.896353584 | 7.529062144 | 7.499655211 | 7.220159122 | 7.99400911   | 7.440219886  | 7.440219886 | 7.440219886 | 7.440219886 | 7.440219886 | 7.440219886 | 7.440219886 | 7.440219886 | 7.440219886 | 7.440219886 | 7.440219886 | 7.440219886 |
| PAPOLG     | 6.874273305 | 6.795880027 | 6.975258076 | 8.20991043  | 7.585371165 | 7.668292749  | 7.442931155  | 7.663602166 | 8.068150858 | 7.38311315  | 7.876523204 | 8.003440086 | 6.839651746 | 6.998656317 | 7.17640253  | 7.913726261 | 7.748992845 | 6.942285423 |
| ZNF430     | 7.366018838 | 7.366018838 | 7.400712987 | 7.366018838 | 7.366018838 | 7.366018838  | 7.366018838  | 7.366018838 | 7.366018838 | 7.366018838 | 7.366018838 | 7.366018838 | 7.366018838 | 7.366018838 | 7.366018838 | 7.366018838 | 7.366018838 | 7.366018838 |
| MER3       | 7.494176754 | 7.246280883 | 7.117740317 | 6.697124454 | 8.019891135 | 8.435629542  | 6.5813959237 | 7.384145524 | 7.384145524 | 7.384145524 | 7.384145524 | 7.384145524 | 7.384145524 | 7.384145524 | 7.384145524 | 7.384145524 | 7.384145524 | 7.384145524 |
| SDFH2      | 8.376686178 | 7.634888294 | 7.048987087 | 8.01841746  | 8.049412368 | 7.383410765  | 7.752121771  | 7.058256948 | 7.679286738 | 7.517857593 | 7.416517131 | 7.710106306 | 6.151443303 | 7.907874753 | 7.490816298 | 7.71274853  | 7.508301371 | 7.442027429 |
| AP51       | 7.75965691  | 7.912662074 | 8.173064985 | 8.388838749 | 8.388838749 | 8.388838749  | 8.388838749  | 8.388838749 | 8.388838749 | 8.388838749 | 8.388838749 | 8.388838749 | 8.388838749 | 8.388838749 | 8.388838749 | 8.388838749 | 8.388838749 | 8.388838749 |
| ZBED1      | 7.572042448 | 7.682802694 | 7.735286989 | 7.898572795 | 6.96537426  | 6.148695308  | 8.165383501  | 7.11389137  | 7.585485028 | 7.034897681 | 7.64432086  | 7.453785404 | 6.90290566  | 7.394468485 | 6.605648903 | 7.940240645 | 7.116608121 | 7.222770154 |
| MFS2DA     | 7.352069224 | 7.973454455 | 7.245041286 | 6.123860634 | 8.06334217  | 5.54124914   | 6.566452807  | 7.481305917 | 7.602707005 | 7.887490993 | 7.417521256 | 7.483252812 | 6.112626023 | 7.545060239 | 7.25055079  | 7.273693111 | 8.92214047  |             |
| ALKBH6     | 7.329398747 | 7.843287877 | 7.948467675 | 8.37967231  | 7.877060229 | 8.027120663  | 7.450387956  | 7.3388353   | 7.399643535 | 7.354658248 | 7.31805507  | 7.710440397 | 8.213977574 | 8.621670839 | 7.268660709 | 7.375656254 | 7.574112872 | 7.279252596 |
| UPK13L     | 7.934569603 | 7.934569603 | 7.009884467 | 7.188648963 | 7.188648963 | 7.188648963  | 7.188648963  | 7.188648963 | 7.188648963 | 7.188648963 | 7.188648963 | 7.188648963 | 7.188648963 | 7.188648963 | 7.188648963 | 7.188648963 | 7.188648963 | 7.188648963 |
| HZAFJ      | 8.03292791  | 7.647126002 | 7.747806728 | 7.647126002 | 7.647126002 | 7.647126002  | 7.647126002  | 7.647126002 | 7.647126002 | 7.647126002 | 7.647126002 | 7.647126002 | 7.647126002 | 7.647126002 | 7.647126002 | 7.647126002 | 7.647126002 | 7.647126002 |
| AP55       | 7.229262832 | 7.454502395 | 7.454502395 | 7.262584216 | 8.024466703 | 7.699761732  | 7.261754176  | 7.526574055 | 7.418920083 | 7.370311239 | 7.209598974 | 7.646235351 | 7.674943472 | 7.050138525 | 7.42313674  | 7.585706764 | 7.288624642 |             |
| SERF1B     | 7.338067969 | 7.832877356 | 8.226382657 | 7.0567174   | 7.90654199  | 7.730738877  | 7.828590538  | 7.154525229 | 7.89848445  | 7.19854613  | 7.46372866  | 7.765123013 | 8.360514001 | 6.815570003 | 7.493140422 | 7.488453413 | 7.363268782 | 7.513211028 |
| ZNF765     | 7.137067245 | 8.657195886 | 7.155498082 | 6.917126843 | 6.152788561 | 6.719375113  | 6.794457582  | 7.994192757 | 7.3867608   | 7.700847943 | 7.52620149  | 8.265046919 | 8.47176385  | 8.15842413  | 7.562383295 | 7.919755426 | 7.573666118 | 7.29120252  |
| CAPN15     | 7.300252462 | 7.062460727 | 7.492140376 | 7.00387574  | 7.891490359 | 7.998781338  | 7.382113246  | 7.492966733 | 7.3867608   | 7.700847943 | 7.52620149  | 8.265046919 | 8.47176385  | 8.15842413  | 7.562383295 | 7.919755426 | 7.573666118 | 7.29120252  |
| IER3       | 6.888380713 | 6.99555653  | 7.944714803 | 7.11766437  | 6.922375527 | 8.123599129  | 7.601384818  | 7.931318031 | 7.908110674 | 7.46323474  | 7.222693038 | 6.573116939 | 6.854146502 | 7.864613793 | 7.764167973 | 7.75267272  | 7.556139271 | 7.2893213   |
| PP1R12B    | 6.859870636 | 6.840273645 | 8.252798331 | 7.011713087 | 7.294803689 | 6.628744689  | 6.794020592  | 7.799247704 | 7.477979374 | 7.622693038 | 6.573116939 | 6.854146502 | 7.864613793 | 7.764167973 | 7.75267272  | 7.556139271 | 7.2893213   |             |
| GTPB2      | 7.391361745 | 7.282938678 | 7.566362593 | 6.99507567  | 7.72278105  | 6.649371109  | 7.764119707  | 7.437020142 | 7.44972133  | 7.326591429 | 6.104555313 | 8.774939132 | 7.425831239 | 7.88959733  | 8.017772801 | 7.81309163  | 7.52106871  |             |
| MA3T3      | 7.274871422 | 6.516837955 | 7.716296708 | 7.540932433 | 7.793295173 | 7.723230532  | 7.453666469  | 7.327417858 | 6.908993477 | 7.5114398   | 7.315255564 | 7.661814719 | 7.7141939   | 7.999600152 | 7.699691232 | 7.353536017 | 7.503459909 | 7.233016671 |
| ZNF576     | 7.320751651 | 7.73295259  | 7.320751651 | 7.320751651 | 7.320751651 | 7.320751651  | 7.320751651  | 7.320751651 | 7.320751651 | 7.320751651 | 7.320751651 | 7.320751651 | 7.320751651 | 7.320751651 | 7.320751651 | 7.320751651 | 7.320751651 | 7.320751651 |
| REK14      | 7.937213399 | 8.359739977 | 7.937213399 | 7.937213399 | 7.937213399 | 7.937213399  | 7.937213399  | 7.937213399 | 7.937213399 | 7.937213399 | 7.937213399 | 7.937213399 | 7.937213399 | 7.937213399 | 7.937213399 | 7.937213399 | 7.937213399 | 7.937213399 |
| BCA54      | 7.450451601 | 8.300697974 | 8.153336418 | 8.39810895  | 7.49187797  | 7.928662955  | 7.298966238  | 7.580660573 | 7.34792529  | 7.530470228 | 7.547872095 | 7.511387886 | 8.03734456  | 7.021108701 | 7.445154546 | 7.278004241 | 7.503702525 |             |
| MNA1T      | 7.084871009 | 7.246512506 | 7.467980633 | 7.94561951  | 7.616145883 | 8.073944241  | 7.278790045  | 7.490938138 | 7.52608394  | 7.658679585 | 7.16013278  | 8.349917838 | 7.959993329 | 7.159221432 | 7.571156534 | 7.448058178 | 7.521579583 |             |
| ABL2       | 6.77656006  | 6.845670032 | 8.477860208 | 7.478491751 | 7.631935555 | 7.966701294  | 8.018332079  | 7.406873801 | 7.501008136 | 7.592971436 | 7.534005444 | 6.695516244 | 6.925837923 | 8.041116406 | 7.741216461 | 7.764548609 | 7.655766737 |             |
| WRN        | 6.178411873 | 6.402994072 | 7.154437265 | 7.404196592 | 7.920766209 | 7.6007418743 | 6.333766885  | 7.556392822 | 7.454922644 | 7.878365906 | 6.924667016 | 8.24483289  | 7.831098601 | 7.375060613 | 7.72947469  | 7.75005605  | 7.82142451  | 7.801019528 |
| FAM172A    | 8.056451269 | 7.906760707 | 7.398625145 | 7.906760707 | 7.906760707 | 7.906760707  | 7.906760707  | 7.906760707 | 7.906760707 | 7.906760707 | 7.906760707 | 7.906760707 | 7.906760707 | 7.906760707 | 7.906760707 | 7.906760707 | 7.906760707 | 7.906760707 |
| ZNF426     | 7.773001462 | 6.132135147 | 7.826086851 | 7.45791474  | 8.794908666 | 6.151865484  | 6.58120827   | 7.323801506 | 7.53252474  | 7.628353697 | 7.366676861 | 7.849213609 | 6.233117875 | 8.179333402 | 7.435495964 | 7.698381373 | 7.048934171 | 8.174032615 |
| REK14      | 7.937213399 | 8.359739977 | 7.937213399 | 7.937213399 | 7.937213399 | 7.937213399  | 7.937213399  | 7.937213399 | 7.937213399 | 7.937213399 | 7.937213399 | 7.937213399 | 7.937213399 | 7.937213399 | 7.937213399 | 7.937213399 | 7.937213399 | 7.937213399 |
| XL1T       | 7.962472274 | 7.20267892  | 7.72472208  | 7.20267892  | 7.20267892  | 7.20267892   | 7.20267892   | 7.20267892  | 7.20267892  | 7.20267892  | 7.20267892  | 7.20267892  | 7.20267892  | 7.20267892  | 7.20267892  | 7.20267892  | 7.20267892  | 7.20267892  |
| DUP3       | 7.639782356 | 6.438676641 | 6.615832295 | 7.877345371 | 7.41256774  | 7.768258327  | 7.648289664  | 7.798573407 | 7.410366318 | 7.54532647  | 7.979053594 | 7.46281822  | 7.609916682 | 6.417408532 | 7.798880776 | 7.335535161 | 7.04885117  | 7.734600527 |
| LISA2      | 7.659347448 | 7.189034748 | 7.151750985 | 7.786231988 | 7.459637349 | 7.5084127282 | 7.620579584  | 7.51407137  | 7.300386631 | 7.587267884 | 7.886165806 | 7.951004271 | 7.349356411 | 7.557026625 | 7.49842437  | 7.093768174 | 7.56759867  |             |
| GZE3       | 7.786233286 | 7.587523466 | 7.410247829 | 8.3855684   | 7.349064825 | 7.677000173  | 7.446595506  | 7.662019728 | 7.63955328  | 7.561998024 | 7.559463171 | 7.32508878  | 8.388868009 | 7.140497694 | 7.284711913 | 7.75771994  | 7.431237494 | 7.29507444  |
| PHC2       | 7.35364007  | 7.537644007 | 7.511625016 | 7.742712397 | 7.446680264 | 7.289080751  | 7.509531495  | 7.071199223 | 7.715779285 | 7.711634874 | 7.494210315 | 7.517547191 | 7.219759029 | 7.575145356 | 7.606605955 | 7.03851939  | 7.722078321 |             |
| WRB1P      | 7.2179146   | 6.507472868 | 7.237292048 | 7.51146336  | 6.803426659 | 7.831790241  | 7.866696906  | 7.464370702 | 7.365341191 | 7.065266469 | 7.163954422 | 7.881185388 | 7.20917954  | 7.944166169 | 7.967624369 | 7.893713288 | 7.796759378 | 7.732749654 |
| TARD12     | 7.995679368 | 6.03855331  | 6.03855331  | 7.510472323 | 7.612198622 | 6.732416229  | 8.004741388  | 6.924023792 | 7.440574738 | 7.086174633 | 7.293978466 | 7.551042606 | 7.997473904 | 5.92384249  | 7.756395    |             |             |             |









|           |             |             |             |             |             |             |             |             |             |             |             |               |             |             |             |             |             |
|-----------|-------------|-------------|-------------|-------------|-------------|-------------|-------------|-------------|-------------|-------------|-------------|---------------|-------------|-------------|-------------|-------------|-------------|
| HPF1      | 7.297876207 | 8.244692339 | 6.528645614 | 6.853216678 | 8.119882389 | 7.846457657 | 8.001667497 | 6.9549167   | 7.286386723 | 7.171009475 | 7.657965054 | 7.205635218   | 7.585138492 | 6.948325925 | 7.140914042 | 7.385701244 | 7.445853084 |
| SLC7A6OS  | 7.947254961 | 7.287047235 | 8.047631915 | 5.996613991 | 6.533807026 | 7.511418558 | 6.349581902 | 7.581549808 | 7.058489915 | 7.123245963 | 7.369324408 | 7.568244726   | 7.121660051 | 6.626950621 | 7.434257528 | 7.468412839 | 7.809789187 |
| GTBP10    | 7.216122281 | 7.385131667 | 6.672795399 | 7.841032823 | 5.961785462 | 7.088906079 | 7.365078816 | 7.542602227 | 7.502512528 | 7.076273383 | 7.175528889 | 7.316203168   | 8.026839041 | 7.660150005 | 7.272152891 | 7.801191271 | 7.830032026 |
| CAMSAP1   | 6.931588862 | 6.57895768  | 5.678753582 | 7.440188267 | 6.765120473 | 7.271028123 | 7.766366486 | 6.739318231 | 7.33567901  | 7.452784362 | 7.70354876  | 7.023490767   | 7.846017666 | 7.696700334 | 7.345061677 | 7.235770318 | 7.386798762 |
| MRP5      | 7.14714662  | 6.620152144 | 6.542034798 | 6.732227294 | 7.410633424 | 6.753227294 | 7.115471986 | 7.331741446 | 7.64811896  | 6.571400069 | 6.467890326 | 7.214177138   | 7.488144421 | 7.142281017 | 7.124028107 | 7.308098263 | 7.386329633 |
| GFC2      | 6.919276482 | 7.174126062 | 8.319325248 | 7.809933757 | 6.805858587 | 7.041374278 | 7.409219139 | 7.67179351  | 7.270504337 | 7.075058712 | 7.028520954 | 7.207386666   | 6.142727122 | 7.543270721 | 7.651401320 | 7.162710858 | 7.516578183 |
| CDKL5     | 6.971217091 | 6.546537096 | 6.748490104 | 7.311473438 | 6.695483217 | 7.606372436 | 7.746077311 | 7.929019801 | 7.583672644 | 7.879589129 | 7.367101017 | 6.784100025   | 6.6427750   | 7.008267037 | 7.73760062  | 8.02832961  | 8.196023864 |
| ZNHIT2    | 7.923640437 | 7.989835826 | 8.012015744 | 7.783055222 | 7.705160683 | 7.154459655 | 6.980607708 | 7.419518635 | 7.05383757  | 7.280854459 | 7.178178841 | 7.791374461   | 7.064400767 | 7.367330428 | 7.102762369 | 6.981315582 | 7.603135927 |
| DENN1A    | 7.390444725 | 7.563815746 | 7.924545601 | 7.162080902 | 6.891485866 | 8.087842826 | 7.180452061 | 7.285185298 | 7.17417663  | 7.239712778 | 7.14706445  | 6.732443193   | 7.682131836 | 6.928968409 | 7.666419648 | 7.50253903  | 7.737883781 |
| TRNA1     | 7.68708495  | 6.942310941 | 7.197582401 | 7.925533308 | 5.8405466   | 6.514554814 | 8.025058246 | 7.45249381  | 6.805946966 | 7.36320384  | 7.442419318 | 7.167845368   | 5.803879666 | 7.158760919 | 7.137217659 | 7.619458279 | 7.504565614 |
| MYO1F     | 6.58366275  | 7.526146892 | 6.855133052 | 7.325888168 | 6.90442366  | 6.495609758 | 7.166089698 | 7.934387564 | 7.345171921 | 7.330408383 | 7.343084823 | 6.65829665    | 7.532833568 | 5.748989946 | 8.023899891 | 7.704252702 | 7.909290029 |
| CEACAM11  | 7.61397308  | 7.962923821 | 8.400434266 | 7.73203365  | 7.74898958  | 7.23148825  | 7.204523758 | 6.84689569  | 7.64689569  | 7.441746671 | 7.345144326 | 7.085184727   | 8.105165233 | 6.767171075 | 6.248661806 | 7.067858517 | 5.896577701 |
| AASDH     | 7.511895750 | 7.099129132 | 6.55490456  | 7.685719408 | 7.644630292 | 6.338853889 | 7.835746587 | 7.335985294 | 7.125916871 | 6.97140273  | 6.998972039 | 7.655806383   | 7.056898678 | 7.085639747 | 7.336478957 | 7.56134818  | 7.343961343 |
| HIST2H2BF | 7.162762385 | 7.162077185 | 7.162077185 | 7.162077185 | 7.162077185 | 7.162077185 | 7.162077185 | 7.162077185 | 7.162077185 | 7.162077185 | 7.162077185 | 7.162077185   | 7.162077185 | 7.162077185 | 7.162077185 | 7.162077185 | 7.162077185 |
| ROHBOT3   | 7.675128732 | 7.640350737 | 8.133848015 | 5.941246046 | 7.943631288 | 5.667143349 | 7.532895728 | 7.704433631 | 7.460476329 | 7.378978789 | 7.252617373 | 7.225348324   | 6.684279465 | 7.329638212 | 6.997343348 | 7.064061059 | 7.024607769 |
| LEO1      | 7.899170174 | 6.278651045 | 5.978173198 | 6.514262229 | 7.238898501 | 8.009041612 | 7.332681855 | 7.058378853 | 7.337783735 | 8.031627762 | 6.563189031 | 8.214550888   | 7.23112526  | 7.44825625  | 7.46110583  | 7.716358767 | 7.073190884 |
| PUS1      | 7.625740441 | 7.840796379 | 7.840796379 | 6.95747819  | 6.99182164  | 7.593287922 | 7.637199371 | 7.06615972  | 7.408957142 | 7.08004405  | 6.083795972 | 7.42972797    | 7.726124511 | 7.429417109 | 6.927419136 | 7.077410858 | 7.306639239 |
| CFTN3     | 7.749384196 | 7.46312199  | 7.530749344 | 7.744676586 | 8.28736248  | 6.66805172  | 7.124247004 | 7.026035497 | 6.902461715 | 7.213794278 | 6.838618357 | 7.948537364   | 8.300134285 | 8.06877488  | 7.660799129 | 7.454296592 | 7.38852386  |
| SRH1      | 7.675272846 | 6.526725235 | 7.085801836 | 6.926200716 | 6.989185657 | 7.35739394  | 6.576726728 | 7.352040548 | 7.765798919 | 7.167571713 | 7.311103838 | 7.852739035   | 7.366939888 | 7.3326117   | 7.334868444 | 6.968693004 | 7.30194041  |
| CEACAM1   | 8.110369449 | 5.455245709 | 7.895696557 | 7.79958576  | 5.71283975  | 7.734583838 | 6.930371129 | 7.792350605 | 7.565104375 | 6.62592377  | 7.314389866 | 7.425699283   | 8.931446489 | 5.520072542 | 6.987918328 | 7.153367377 | 7.415321804 |
| KIT12     | 8.116147076 | 7.343146747 | 8.626720742 | 7.204450867 | 7.033083003 | 7.376476511 | 7.991435138 | 7.227344095 | 7.367476511 | 7.676015977 | 6.953306674 | 7.875788257   | 8.525156556 | 8.27786633  | 8.806501504 | 7.323725108 | 7.028335569 |
| NRDE2     | 7.165451547 | 7.178473459 | 7.151266315 | 7.535310601 | 7.711192253 | 6.405994011 | 7.458614416 | 7.055242213 | 8.083285442 | 7.528202871 | 7.207745691 | 7.47172318    | 7.071947127 | 6.442234164 | 7.829449664 | 7.61482404  | 8.674799672 |
| PKHA2     | 8.052755997 | 7.608265222 | 7.343057097 | 7.388559167 | 6.417578883 | 7.752686955 | 7.047842948 | 7.43350486  | 7.615187778 | 7.047842948 | 7.651877858 | 7.820858052   | 6.581688676 | 6.366937615 | 7.199578368 | 7.298912174 | 7.090040438 |
| NOCAL     | 7.689459887 | 7.203585887 | 7.268568887 | 7.203585887 | 7.203585887 | 7.203585887 | 7.203585887 | 7.203585887 | 7.203585887 | 7.203585887 | 7.203585887 | 7.203585887   | 7.203585887 | 7.203585887 | 7.203585887 | 7.203585887 | 7.203585887 |
| LEF1      | 6.694465183 | 6.533174666 | 7.294240308 | 6.562010058 | 7.188978161 | 7.425456475 | 8.002631968 | 7.44122103  | 7.221479963 | 7.368912972 | 6.784698932 | 6.10794214    | 7.692714554 | 5.864982923 | 7.605457934 | 7.704950987 | 7.334490984 |
| TEX9      | 7.048207796 | 7.674242127 | 7.799056083 | 6.77969965  | 7.662232421 | 6.656383887 | 7.623010558 | 6.662723161 | 7.559496073 | 7.126246154 | 7.343545078 | 7.408817339   | 7.835628697 | 5.782675025 | 6.919797572 | 7.062675594 | 7.085552174 |
| SRH1      | 8.023713735 | 7.988103748 | 7.988103748 | 7.988103748 | 7.988103748 | 7.988103748 | 7.988103748 | 7.988103748 | 7.988103748 | 7.988103748 | 7.988103748 | 7.988103748   | 7.988103748 | 7.988103748 | 7.988103748 | 7.988103748 | 7.988103748 |
| SYNP0     | 7.847371795 | 7.847371795 | 7.847371795 | 7.847371795 | 7.847371795 | 7.847371795 | 7.847371795 | 7.847371795 | 7.847371795 | 7.847371795 | 7.847371795 | 7.847371795   | 7.847371795 | 7.847371795 | 7.847371795 | 7.847371795 | 7.847371795 |
| CBX6      | 7.257644133 | 7.516943081 | 7.006184206 | 7.310162991 | 6.528491172 | 7.742632485 | 7.352919973 | 8.113176908 | 7.298937663 | 7.248400113 | 8.056334252 | 7.932248882   | 8.197876031 | 6.721233023 | 8.041895228 | 8.673143734 | 7.498262336 |
| SLC27A5   | 7.594531988 | 7.338629429 | 7.719396647 | 7.799578204 | 7.437442272 | 7.096578107 | 6.971920713 | 6.566400802 | 7.396053871 | 7.109652077 | 7.369010392 | 7.109652077   | 7.369010392 | 7.109652077 | 7.369010392 | 7.109652077 | 7.369010392 |
| ZNF523    | 7.984502415 | 7.240492415 | 7.725864708 | 7.589996324 | 7.682618752 | 6.073062044 | 7.40047859  | 7.170239276 | 7.516504723 | 7.243913872 | 7.040955995 | 7.036390055   | 7.52854351  | 8.238009084 | 8.836752783 | 7.477723393 | 7.118359662 |
| FRS2      | 7.255179771 | 7.368824633 | 7.059977931 | 7.059977931 | 7.059977931 | 7.059977931 | 7.059977931 | 7.059977931 | 7.059977931 | 7.059977931 | 7.059977931 | 7.059977931   | 7.059977931 | 7.059977931 | 7.059977931 | 7.059977931 | 7.059977931 |
| H2AF2     | 7.536069781 | 7.565334353 | 8.005578256 | 7.355323736 | 7.123906106 | 7.640090725 | 7.498401976 | 7.477461353 | 7.163810271 | 7.203524627 | 7.281824642 | 7.296043317   | 7.645964947 | 5.819839285 | 7.381578578 | 7.057390754 | 7.26653182  |
| KCNJ14    | 7.857474986 | 7.857474986 | 7.857474986 | 7.857474986 | 7.857474986 | 7.857474986 | 7.857474986 | 7.857474986 | 7.857474986 | 7.857474986 | 7.857474986 | 7.857474986   | 7.857474986 | 7.857474986 | 7.857474986 | 7.857474986 | 7.857474986 |
| MYB18     | 7.346749891 | 6.947104294 | 7.407404889 | 8.340470524 | 7.528966669 | 7.099140474 | 7.994596716 | 7.393597610 | 7.408127610 | 7.205275921 | 7.292858056 | 7.118782143   | 7.904317178 | 8.042597816 | 7.105478478 | 7.568318616 | 7.759208669 |
| ARHGFE5   | 6.258990232 | 5.899541345 | 6.174761923 | 7.346296737 | 7.737946582 | 7.575205999 | 6.630458043 | 7.436751846 | 7.30208335  | 7.39022772  | 7.044004213 | 6.858991572   | 7.104760020 | 8.031276167 | 8.04859389  | 7.592013499 | 7.195535083 |
| Csor4f2   | 7.817174044 | 6.891735668 | 7.893757607 | 6.934703555 | 6.347901583 | 6.207699666 | 7.950145891 | 7.390796618 | 8.371351928 | 7.380700938 | 6.425677756 | 6.559401662   | 8.038178192 | 6.670913814 | 7.89736568  | 7.505727611 | 7.719113884 |
| PLGRK7    | 6.965835237 | 7.56387602  | 7.066314082 | 7.265888422 | 7.792083575 | 7.786811877 | 7.642221882 | 7.247094799 | 7.51881558  | 7.165519691 | 7.399487285 | 8.119595556   | 7.841945212 | 6.882398542 | 7.504761271 | 7.242866586 | 7.222760992 |
| KBTBD4    | 8.024204719 | 7.803538284 | 7.834317339 | 7.834317339 | 7.834317339 | 7.834317339 | 7.834317339 | 7.834317339 | 7.834317339 | 7.834317339 | 7.834317339 | 7.834317339   | 7.834317339 | 7.834317339 | 7.834317339 | 7.834317339 | 7.834317339 |
| ZNF189    | 6.582572984 | 6.976737799 | 7.798135135 | 7.407500625 | 6.706197495 | 6.652195998 | 8.13242396  | 7.345995155 | 7.550899485 | 7.41647904  | 7.299157413 | 6.63382559    | 7.98838776  | 7.781879935 | 7.262166539 | 7.452679959 | 7.182278954 |
| SLC37A4   | 6.489872966 | 6.368433006 | 6.733525567 | 7.756302909 | 7.949757123 | 6.347371528 | 7.037050815 | 7.397986443 | 7.76506738  | 7.725906738 | 7.495970076 | 8.098133717   | 7.142472176 | 6.311125011 | 7.678644791 | 7.226595594 | 8.922884701 |
| KIF18A    | 7.936139381 | 7.805148797 | 6.805148797 | 6.805148797 | 6.805148797 | 6.805148797 | 6.805148797 | 6.805148797 | 6.805148797 | 6.805148797 | 6.805148797 | 6.805148797   | 6.805148797 | 6.805148797 | 6.805148797 | 6.805148797 | 6.805148797 |
| ILIR2     | 7.61538535  | 7.372197096 | 7.329952528 | 7.224157081 | 7.996139931 | 7.503978764 | 7.442714343 | 7.265283231 | 7.07780543  | 7.225862926 | 7.313065112 | 7.359594566   | 7.500363121 | 7.59201652  | 7.192947471 | 7.254147858 | 7.263354112 |
| DNAJC5    | 7.96714684  | 8.026805623 | 8.026805623 | 7.442149951 | 7.67473806  | 7.381116752 | 7.252376444 | 7.541489251 | 7.235237444 | 7.439052048 | 7.339052048 | 7.104725484</ |             |             |             |             |             |



|          |             |              |             |              |             |             |             |             |             |              |              |             |             |             |             |             |             |             |
|----------|-------------|--------------|-------------|--------------|-------------|-------------|-------------|-------------|-------------|--------------|--------------|-------------|-------------|-------------|-------------|-------------|-------------|-------------|
| TTCA     | 7.565245604 | 7.951045283  | 7.612601434 | 6.39547328   | 7.807251051 | 6.935513016 | 7.428198049 | 7.243278157 | 7.029244977 | 7.225545426  | 7.025080992  | 7.783961293 | 8.517801495 | 5.696159598 | 6.7819904   | 7.240279492 | 7.240178257 | 7.317053072 |
| GUF1     | 7.611275135 | 7.620640434  | 5.797867017 | 7.414646091  | 7.266202228 | 5.800404166 | 7.247881544 | 7.087168526 | 7.067596616 | 7.562460263  | 7.294693013  | 7.232518987 | 8.844110807 | 5.87525459  | 7.169201423 | 7.884389499 | 7.270265636 | 7.398341    |
| CBX1     | 7.281509465 | 6.995510469  | 7.468867881 | 7.7143443087 | 7.615838427 | 7.277878217 | 7.466371133 | 7.256761743 | 7.295586889 | 7.159690912  | 7.002956426  | 7.238659033 | 6.871137816 | 5.999275878 | 6.932396639 | 7.24102815  | 7.24102815  | 6.936966349 |
| CZorIB   | 7.479855315 | 6.928667112  | 8.166651612 | 6.933831401  | 7.648807802 | 7.019361249 | 6.285727326 | 7.088418566 | 7.678153312 | 7.395010562  | 7.666448804  | 6.176886575 | 6.020773662 | 6.27295193  | 7.187552328 | 7.436699476 | 7.292157635 | 7.560299667 |
| DNAI     | 7.337398639 | 7.265098829  | 7.307598918 | 7.260649028  | 7.066490428 | 7.241793009 | 7.431719273 | 7.431719273 | 7.090330849 | 7.390330849  | 7.178990917  | 7.163018046 | 8.021724295 | 7.946652216 | 7.286499069 | 7.067934125 | 7.338894339 | 7.286166598 |
| DCAF     | 6.240737724 | 7.426787751  | 6.900384422 | 7.407134469  | 7.465532089 | 6.727185143 | 6.991721193 | 6.991721193 | 7.116475897 | 7.116475897  | 7.166278604  | 6.675889179 | 7.027211259 | 7.025204645 | 6.63642751  | 7.554842843 | 7.098807073 | 7.530735422 |
| STK3     | 7.127185644 | 6.596898341  | 8.542203753 | 7.223636381  | 7.82953347  | 7.773024247 | 7.251640207 | 7.258807277 | 6.98091683  | 7.185428027  | 7.374765752  | 8.116589321 | 6.195137613 | 6.025359078 | 7.510713846 | 6.636495586 | 7.271952722 | 6.968620566 |
| CNTR0B   | 6.312921153 | 6.81970925   | 6.879855233 | 7.4721645    | 6.865906662 | 7.015236833 | 7.520371026 | 7.285666813 | 7.157360182 | 7.157360182  | 7.171067052  | 7.164174254 | 7.820305179 | 8.09922879  | 7.152259164 | 7.6696959   | 7.493912491 | 7.107107374 |
| RAB13    | 7.128228018 | 7.522054971  | 6.845910402 | 7.165151581  | 7.228013012 | 7.247887957 | 7.025643421 | 6.841086131 | 7.455470954 | 7.23362191   | 7.628266328  | 7.454007854 | 7.757544003 | 7.213756232 | 7.128162971 | 7.238415558 | 6.943194466 | 7.7077865   |
| GCFR     | 7.893468151 | 7.230164216  | 6.832902553 | 7.25337627   | 7.59751612  | 6.293993765 | 6.958732785 | 7.108433678 | 7.108433678 | 7.102702677  | 7.366274578  | 7.313571772 | 7.906222449 | 6.109564467 | 7.294847054 | 7.205560286 | 7.446479374 | 7.089951708 |
| ETS1     | 7.510803606 | 7.178599844  | 7.861913738 | 7.285652399  | 7.057100248 | 7.058032025 | 7.130428265 | 7.220533329 | 6.853788713 | 7.469246527  | 7.334240979  | 7.226209225 | 6.489616176 | 6.199013532 | 7.329002559 | 7.130989883 | 5.528257884 | 7.823415804 |
| MUC20    | 7.324550845 | 7.2356530849 | 7.472769944 | 7.652499572  | 7.361035017 | 7.518739131 | 7.232935733 | 6.807939643 | 7.171919435 | 7.104956695  | 7.529066239  | 5.705794933 | 5.820489594 | 7.243032083 | 7.27157636  | 7.11002825  | 7.40834787  |             |
| SFR1     | 7.388369717 | 8.179367996  | 7.314729691 | 7.607799707  | 7.549213934 | 6.64213742  | 6.683611789 | 7.21424664  | 7.392943824 | 7.193677274  | 7.03780225   | 7.149042656 | 7.487816189 | 5.760545918 | 7.645159871 | 7.061962022 | 7.253379497 | 7.514967452 |
| SERPINE2 | 7.780450015 | 7.69204507   | 5.544190046 | 7.756085799  | 7.565351301 | 7.410664808 | 7.27854669  | 7.391896397 | 7.814615635 | 7.52654662   | 7.52654662   | 6.106707668 | 5.559483953 | 7.808857764 | 7.54733595  | 6.519002814 | 7.187448948 | 7.80678647  |
| HMB0X1   | 6.694122692 | 7.652812674  | 7.873317151 | 6.840430697  | 6.697149636 | 6.75231388  | 7.66280434  | 7.583695807 | 6.99644286  | 7.515841896  | 7.526333096  | 6.858884786 | 7.835894896 | 7.43150969  | 7.392464937 | 7.196783267 | 7.272156219 | 7.069100971 |
| VIPAS39  | 7.095153485 | 7.766818471  | 7.865802838 | 7.608791738  | 7.639974524 | 7.520614019 | 7.718233423 | 7.249170364 | 6.563420408 | 7.513757211  | 7.475940054  | 6.643295072 | 6.674740734 | 7.203922307 | 7.00059117  |             |             |             |
| CDZ26    | 7.975768244 | 6.61092148   | 8.52473625  | 6.393688088  | 6.694759873 | 7.298971629 | 6.614557068 | 7.244662771 | 7.984823353 | 8.308118024  | 7.728450624  | 7.511670394 | 6.857272243 | 6.599893156 | 7.220568675 | 7.034724316 | 7.335712242 | 6.7816185   |
| XAB2     | 7.307563944 | 7.230583865  | 7.40184818  | 7.14833388   | 7.207218601 | 6.788756551 | 8.018371428 | 7.388748629 | 7.039916827 | 7.039916827  | 7.91526284   | 7.394739839 | 8.033350451 | 7.230119673 | 7.073706017 | 6.899661127 | 7.128012364 |             |
| NDI1     | 7.396934779 | 6.611215163  | 7.22739774  | 7.208513846  | 6.968664264 | 7.034306373 | 7.432301381 | 7.239396759 | 7.359627297 | 7.23047075   | 7.256425214  | 7.181467126 | 7.316808763 | 6.729148083 | 6.88467777  | 7.91108813  | 7.445144717 | 7.437098809 |
| GEI24    | 6.252349998 | 5.941043986  | 7.123515074 | 6.532616276  | 6.532616276 | 6.532616276 | 7.825874633 | 7.087710207 | 7.442867148 | 7.087710207  | 7.442867148  | 7.087710207 | 7.442867148 | 7.087710207 | 7.442867148 | 7.087710207 | 7.442867148 | 7.087710207 |
| PARVQ    | 7.54219226  | 6.63820646   | 6.19449985  | 6.43068101   | 6.270945147 | 7.478468917 | 7.050901195 | 6.936023972 | 7.846894161 | 7.73468488   | 6.656942029  | 7.11036221  | 7.589199372 | 7.295187449 | 7.166248949 | 7.968698325 | 7.999832707 |             |
| PKD3     | 7.161396462 | 7.735873989  | 5.738169586 | 8.016292284  | 7.656934067 | 6.71655266  | 7.011266255 | 6.950553006 | 6.886735564 | 7.11264336   | 7.077365449  | 6.790532476 | 7.29264711  | 7.712772708 | 7.330422007 | 7.454806171 | 7.46449027  | 7.651521882 |
| TBK2     | 6.519530025 | 8.216104209  | 7.237605349 | 7.588839058  | 6.172320597 | 7.407735099 | 7.38540046  | 7.391172399 | 7.505806993 | 7.28815623   | 7.367235556  | 6.443701608 | 6.988659384 | 6.962690801 | 7.221832919 | 7.117878435 | 6.826445603 |             |
| FXO5     | 7.917583926 | 7.465339319  | 7.913891018 | 7.567976026  | 7.041875185 | 7.101220995 | 6.329848414 | 7.109381018 | 6.93282066  | 7.178534005  | 7.405412089  | 7.033003868 | 7.233886784 | 7.957770645 | 7.224851232 | 7.203596094 | 7.076063628 | 7.307716939 |
| SIF2     | 6.864632845 | 6.51954923   | 7.930868342 | 7.492514964  | 6.652198255 | 7.399272415 | 5.911198397 | 7.789020556 | 7.229022558 | 7.533270711  | 7.107029711  | 7.029414943 | 7.227959454 | 7.340455779 | 7.489382627 | 7.234299982 | 7.117341896 | 7.319950615 |
| PXYL1    | 7.65337563  | 6.175216438  | 5.827013438 | 7.229561506  | 7.348861234 | 6.828087302 | 7.568660135 | 6.733148854 | 7.384427747 | 7.056572908  | 7.449392485  | 7.240699969 | 7.722541615 | 8.652479866 | 7.868682899 | 7.100754432 | 7.069087074 | 7.228456599 |
| HATK     | 7.187056173 | 7.178704614  | 7.315460424 | 6.762929173  | 6.751102822 | 7.059290988 | 7.309635172 | 7.228701923 | 7.058500665 | 7.044534413  | 7.06198125   | 7.021061129 | 5.817638366 | 7.419476941 | 7.326547939 | 7.308963940 | 7.215854403 |             |
| ANKS6    | 7.317285792 | 7.224858668  | 8.668796631 | 6.744222769  | 5.99914943  | 7.027008247 | 7.840196911 | 6.953703418 | 7.229118627 | 7.227308149  | 7.007446854  | 7.82782501  | 7.634189923 | 5.634613385 | 7.026311259 | 7.17425392  | 7.415650929 | 6.905769419 |
| PNL7     | 7.89936568  | 7.617077426  | 7.480915404 | 7.520020065  | 7.368937686 | 6.677014677 | 7.37478792  | 6.981681336 | 7.510242891 | 7.510242891  | 7.45516194   | 7.007615447 | 5.731708815 | 7.369946081 | 7.086366679 | 7.281996475 | 7.107303541 | 6.580858471 |
| NFKB1L   | 5.125404476 | 8.160944476  | 8.161952351 | 7.89546436   | 7.606432006 | 7.718502763 | 6.839990137 | 7.160080204 | 7.100392179 | 7.160236296  | 6.903912887  | 7.625233267 | 6.945987198 | 7.001977484 | 7.181038669 | 6.948858398 | 7.720640162 |             |
| TD3L     | 7.853437729 | 6.932364081  | 5.852048231 | 5.769629398  | 7.55627429  | 7.47656888  | 7.07160697  | 7.236314586 | 7.79020558  | 7.236314586  | 7.40521191   | 7.557795357 | 7.381537419 | 6.112304739 | 7.312252282 | 7.865090812 | 7.21493137  | 7.930949058 |
| NETO2    | 5.67183347  | 7.20189216   | 6.089765751 | 5.597804177  | 7.511218135 | 7.248673959 | 7.281332655 | 7.725828735 | 6.198579434 | 7.16207854   | 7.416823787  | 5.543816165 | 5.525145976 | 6.613913231 | 7.742730061 | 7.58374495  | 7.305390626 | 6.654735776 |
| GNAS2A   | 6.932540046 | 6.932540046  | 7.112307997 | 7.112307997  | 7.112307997 | 7.112307997 | 7.112307997 | 7.112307997 | 7.112307997 | 7.112307997  | 7.112307997  | 7.112307997 | 7.112307997 | 7.112307997 | 7.112307997 | 7.112307997 | 7.112307997 | 7.112307997 |
| HLA-DQB1 | 8.809336051 | 6.584959209  | 5.87985728  | 7.084386023  | 7.360139803 | 7.005890984 | 6.302471917 | 7.617793829 | 7.518533982 | 7.208423657  | 7.235604127  | 7.086669695 | 7.134602213 | 6.753993882 | 7.78047595  | 7.48785612  | 6.66875852  |             |
| CTSDP1   | 6.79300621  | 7.312761552  | 7.990743308 | 7.106044179  | 7.32443407  | 7.27787662  | 7.767903928 | 7.251985054 | 7.026002107 | 7.118112888  | 7.075120432  | 7.196416156 | 7.072247128 | 7.560333588 | 7.01768417  | 7.383026032 | 7.304015664 | 7.421709779 |
| NDRG2    | 7.43015156  | 7.862347905  | 5.806262459 | 7.529362416  | 7.36953345  | 7.267099506 | 7.363494258 | 6.98115891  | 7.682467123 | 7.408959282  | 7.045935846  | 5.778247126 | 8.80062786  | 6.247614517 | 7.307875986 | 7.034927952 | 7.180832796 | 7.180832796 |
| FXO15    | 7.60948715  | 6.745598054  | 6.7731032   | 7.254666953  | 7.261934007 | 6.38452863  | 7.031744056 | 7.988387799 | 6.630791934 | 7.132004982  | 7.15219908   | 6.615388811 | 7.567249736 | 7.192643235 | 7.8224126   | 7.903447975 | 6.862893404 | 7.90653286  |
| PDL      | 6.610011673 | 7.466366503  | 6.692644928 | 7.66554226   | 7.28332404  | 7.65542426  | 7.293406729 | 6.881152242 | 7.293406729 | 6.881152242  | 6.932874852  | 7.228028406 | 7.578107005 | 6.218971175 | 6.829059449 | 7.34818997  | 7.049757404 | 7.216464729 |
| SUPT3H   | 7.275586344 | 7.350108361  | 8.06623111  | 7.470097944  | 7.84113194  | 8.03851383  | 7.128218993 | 6.93600727  | 7.451001527 | 6.939770027  | 7.164576757  | 6.996967641 | 6.217149514 | 6.297692123 | 6.8553693   | 7.522163327 | 7.204334704 | 7.222656202 |
| ZNF428   | 7.43079081  | 7.379914879  | 7.486664704 | 7.675621001  | 7.073609905 | 7.055530855 | 7.025852805 | 7.233399999 | 7.356936024 | 7.1872877926 | 7.210846093  | 6.738026091 | 6.487402963 | 7.079677886 | 7.239904467 | 7.25464327  | 7.15189213  | 7.141270509 |
| GCN2A    | 7.428989329 | 7.363878097  | 6.101712723 | 7.104951683  | 7.176469428 | 7.51711696  | 7.355130286 | 7.490530286 | 7.021760562 | 7.021760562  | 7.5141451594 | 7.070496962 | 6.89991594  | 7.112108797 | 7.112108797 | 7.112108797 | 7.112108797 | 7.112108797 |
| TENM60   | 7.553890553 | 7.822922219  | 7.667216032 | 7.20553667   | 7.443652862 | 7.811363544 | 7.602090864 | 7.193985939 | 7.484884802 | 7.130828802  | 7.094124771  | 7.479720037 | 5.771441843 | 7.237724597 | 6.8         |             |             |             |

|            |              |             |              |             |             |             |             |             |             |             |             |             |             |             |             |             |             |             |
|------------|--------------|-------------|--------------|-------------|-------------|-------------|-------------|-------------|-------------|-------------|-------------|-------------|-------------|-------------|-------------|-------------|-------------|-------------|
| KUFR       | 7.829361262  | 7.209066841 | 7.921397461  | 5.751675312 | 5.853481678 | 6.166773886 | 8.31494211  | 7.19420654  | 7.440958324 | 7.127308338 | 7.195155891 | 7.857992147 | 6.391997081 | 8.013962165 | 7.613590658 | 6.776823613 | 7.084701819 | 6.459663683 |
| NUDFAF     | 7.196738265  | 7.767328968 | 7.678328968  | 7.219885538 | 7.705994512 | 7.794876373 | 5.935195702 | 7.163009124 | 7.163005036 | 7.008243929 | 6.818822633 | 6.982698406 | 7.188923563 | 6.488022093 | 7.302918615 | 7.088356031 | 7.407579035 | 7.439897924 |
| EFEM2F     | 7.384125488  | 7.282840036 | 7.73614302   | 7.31826123  | 7.548097113 | 7.079974679 | 7.250040063 | 6.910983241 | 7.131019735 | 7.24426695  | 6.924379149 | 6.787257234 | 7.524791554 | 8.067165427 | 7.174540007 | 6.925119539 | 7.029883884 | 7.208619205 |
| TRIM25     | 7.23135917   | 7.256189353 | 7.00881828   | 6.665120651 | 6.231971678 | 6.145477453 | 5.566549261 | 7.786365499 | 6.635097773 | 8.122551351 | 7.151486439 | 6.588566805 | 6.889357969 | 8.104000115 | 8.199841424 | 8.356259354 | 8.617886589 | 8.491002627 |
| IFTA       | 7.15387911   | 7.415661284 | 7.456612804  | 7.099080083 | 7.578925233 | 7.899080083 | 7.604280158 | 7.003216546 | 7.003216546 | 7.004331191 | 7.111065823 | 5.963051505 | 6.991293855 | 7.295804317 | 7.215166518 | 6.791706410 | 7.27241469  | 7.484650868 |
| PTLH       | 7.09586356   | 7.050155223 | 7.867366734  | 7.05856734  | 7.524343959 | 7.23685659  | 5.655840291 | 6.688101848 | 6.688101848 | 7.183248316 | 7.183248316 | 7.200545278 | 7.524067272 | 6.544874709 | 8.064510422 | 6.585786568 | 6.972895061 | 6.682690861 |
| LNK2       | 6.689048653  | 7.148038797 | 6.818561462  | 7.462476381 | 7.320197569 | 7.48649719  | 6.971191002 | 7.031917566 | 7.914241632 | 7.170218558 | 7.525647148 | 7.973520252 | 7.226582924 | 8.018004474 | 7.211600842 | 7.600496564 | 8.660430047 | 7.717780389 |
| PHTF2      | 5.641220014  | 7.548509474 | 7.548509474  | 7.403780674 | 6.476888856 | 6.511549276 | 6.971274827 | 6.311549276 | 6.998655397 | 6.717182356 | 6.717182356 | 6.717182356 | 6.165356066 | 6.185303929 | 7.420822832 | 7.237604738 | 7.224214773 | 7.24706393  |
| PIDD1      | 7.159469139  | 7.587302205 | 7.530255203  | 6.06340639  | 6.673183887 | 6.129876076 | 6.026121525 | 7.422296639 | 7.366740074 | 7.319955125 | 6.099198789 | 6.91235741  | 7.193482859 | 7.365789744 | 7.31849851  | 7.185398561 | 7.199329535 | 7.162074939 |
| NU1555     | 6.149812899  | 6.589443568 | 7.337196463  | 6.589443568 | 6.8183887   | 8.25656838  | 7.227312101 | 7.379419125 | 7.738956306 | 6.780523447 | 6.290540371 | 8.276470629 | 5.983285237 | 6.681714402 | 7.945005984 | 6.932936346 | 7.068979479 |             |
| ZNF526     | 6.394739716  | 6.859671578 | 7.229798152  | 7.697452086 | 7.562695993 | 7.132290315 | 7.358941354 | 7.358941354 | 7.449523466 | 7.068765817 | 7.266438877 | 6.842011311 | 7.039689226 | 7.062487732 | 7.062487732 | 7.624571274 | 7.160215602 |             |
| TFHAPB11   | 7.216872277  | 6.039095743 | 7.523411479  | 7.703327903 | 7.197691691 | 7.402590381 | 7.402590381 | 7.402590381 | 7.349390778 | 7.335289676 | 6.674877559 | 6.243242156 | 6.118998882 | 8.130549689 | 7.171691541 | 7.141052853 | 7.340078701 | 7.178372698 |
| IGLL1      | 7.202027722  | 7.434469911 | 7.17942688   | 7.511038124 | 7.117942688 | 7.511038124 | 8.95051803  | 7.303645508 | 6.988293532 | 7.389430341 | 7.497880693 | 6.921210157 | 7.122201298 | 7.196286981 | 6.815175688 | 6.430071213 | 7.147838208 | 6.83436075  |
| UTP15      | 5.771260568  | 6.190927708 | 6.016184027  | 5.906758556 | 7.104949742 | 7.039302659 | 7.451751488 | 7.229582394 | 7.3752998   | 6.949806173 | 7.078628903 | 7.26224674  | 7.77231858  | 8.25291116  | 6.658631615 | 7.393323871 | 7.135754833 | 7.515274035 |
| MYLK       | 7.818845085  | 7.249789352 | 6.289349593  | 7.249789352 | 7.852184745 | 7.591169316 | 5.890497489 | 7.159169316 | 7.050943956 | 7.207458103 | 6.681147697 | 6.467335965 | 5.803666257 | 6.32100878  | 7.634750035 | 6.653741076 | 7.250507379 | 7.098793372 |
| TRO        | 7.347585867  | 8.069686799 | 6.0074735231 | 5.600113009 | 7.336263605 | 7.589240046 | 6.088652947 | 7.026437104 | 6.924051216 | 7.690071203 | 7.038034829 | 7.786411762 | 7.879569185 | 7.400316941 | 7.393158709 | 7.590480642 | 6.93462115  | 6.974040929 |
| CHMPC4     | 7.165566063  | 7.365974494 | 7.349946031  | 7.702151548 | 7.182776452 | 6.925810785 | 7.05446509  | 6.912144465 | 7.05446509  | 6.876383552 | 7.182576773 | 6.898071274 | 7.435660593 | 7.070461339 | 6.822895474 | 7.195732481 | 8.626320964 | 7.659817812 |
| GON7       | 6.703813897  | 7.975861387 | 7.420086184  | 7.200120544 | 7.244634965 | 7.648382446 | 7.648382446 | 7.407329614 | 7.648365891 | 7.407329614 | 7.430414975 | 7.896076695 | 7.250312988 | 6.767293373 | 7.013026544 | 7.014754397 | 6.918095293 | 7.122296429 |
| ZFP90      | 7.709448777  | 7.413736972 | 6.255852912  | 7.561189077 | 7.56073435  | 6.882372939 | 6.091976409 | 7.332944823 | 7.284879055 | 7.145728811 | 7.145728811 | 6.590672836 | 8.376662385 | 6.417643293 | 7.043534155 | 7.306388843 | 6.980845134 | 6.999195375 |
| FLAG1      | 7.471956917  | 7.734266888 | 6.300289784  | 6.300289784 | 7.665149931 | 6.812619955 | 6.971155507 | 7.162674508 | 7.192586198 | 7.170546596 | 7.847472901 | 6.568455106 | 6.515991137 | 8.110861954 | 7.377654216 | 7.323870887 | 7.431838807 | 7.432008674 |
| DKX57      | 6.854668818  | 7.132705589 | 7.126113216  | 7.101859962 | 7.201514241 | 7.43617561  | 7.531028474 | 6.985219007 | 6.885219007 | 6.885219007 | 6.885219007 | 6.885219007 | 6.885219007 | 6.885219007 | 6.885219007 | 6.885219007 | 6.885219007 | 6.885219007 |
| AGTRAP     | 6.814871565  | 7.17373552  | 7.115046651  | 7.115046651 | 7.331584886 | 7.091514886 | 7.231703859 | 6.689505008 | 7.147642565 | 7.214374335 | 7.331799218 | 7.684052395 | 7.88294265  | 8.042412794 | 6.84162872  | 6.653324224 | 6.684784075 | 7.30270617  |
| DNAA1F     | 5.548694751  | 6.808997471 | 6.741385082  | 6.046309145 | 6.453346619 | 4.910574124 | 7.329601726 | 6.487911949 | 7.031129826 | 6.245259793 | 8.338691425 | 5.738214849 | 8.264494302 | 6.649765074 | 8.623005442 | 5.885858527 | 8.426545661 | 8.256289912 |
| PNKX       | 7.974486149  | 5.544861743 | 5.442667623  | 5.544861743 | 8.490221217 | 7.191739897 | 7.397162328 | 7.097369726 | 7.739173987 | 7.225068395 | 7.467789875 | 5.977252371 | 5.568005568 | 7.288323308 | 7.030598258 | 7.168795598 | 7.168795598 | 7.168795598 |
| PPID       | 7.253980276  | 6.488481174 | 6.839566568  | 7.863082746 | 7.038048827 | 6.009783125 | 6.240051306 | 7.14659382  | 7.14659382  | 7.095575733 | 7.573590525 | 6.465318501 | 6.635690867 | 6.590348559 | 7.64861003  | 7.088928921 | 7.165707243 | 7.991688728 |
| WPB11      | 7.482396678  | 7.425373357 | 6.295133215  | 7.127248228 | 6.155334923 | 6.164295881 | 6.225873873 | 7.189062411 | 7.730619326 | 7.109559643 | 7.170858558 | 6.511773637 | 7.868346985 | 6.73562002  | 7.587635754 | 7.471439855 | 7.358918296 | 7.616501616 |
| CDZ76      | 6.9713199315 | 7.174965622 | 6.066780988  | 7.427619531 | 7.036510225 | 7.033675139 | 8.200397863 | 7.169990091 | 7.458183904 | 7.178063122 | 7.185138164 | 7.399481732 | 6.972769741 | 7.426793318 | 7.181599117 | 7.222798027 | 7.348939661 | 6.229649097 |
| WYF11      | 7.281298517  | 6.231298517 | 6.231298517  | 6.231298517 | 6.231298517 | 6.231298517 | 6.231298517 | 6.231298517 | 6.231298517 | 6.231298517 | 6.231298517 | 6.231298517 | 6.231298517 | 6.231298517 | 6.231298517 | 6.231298517 | 6.231298517 | 6.231298517 |
| WDSUB1     | 7.516243502  | 8.164391959 | 6.99404616   | 6.99404616  | 6.99404616  | 6.99404616  | 6.99404616  | 6.99404616  | 6.99404616  | 6.99404616  | 6.99404616  | 6.99404616  | 6.99404616  | 6.99404616  | 6.99404616  | 6.99404616  | 6.99404616  | 6.99404616  |
| CBR4       | 7.597101328  | 8.393486668 | 6.378540238  | 7.992052192 | 6.62883882  | 6.95855665  | 5.678040266 | 7.37357138  | 7.169291314 | 7.368979494 | 6.675024381 | 8.366705805 | 8.660154345 | 7.140659903 | 7.189358256 | 7.470245446 | 7.467549996 | 7.913062895 |
| FADD       | 7.227796818  | 6.994427702 | 6.858993192  | 8.100572429 | 7.858993192 | 7.69968638  | 8.041724828 | 7.226661357 | 7.131207453 | 7.102492785 | 7.675210467 | 7.540554669 | 7.805073719 | 7.685975831 | 7.086843473 | 7.097932599 | 6.966457149 | 7.092510619 |
| PH1-94917. | 7.126105197  | 6.877926363 | 7.108148084  | 7.390265134 | 7.604200351 | 7.156801385 | 7.207740418 | 7.241633902 | 7.362520412 | 7.462597112 | 7.028125753 | 7.443205876 | 6.506956608 | 7.808277741 | 7.268026585 | 7.159175064 | 7.19700515  | 7.402652948 |
| R3HDM2     | 6.989895037  | 7.493017280 | 7.356071669  | 7.493017280 | 7.356071669 | 7.493017280 | 7.356071669 | 7.493017280 | 7.356071669 | 7.493017280 | 7.356071669 | 7.493017280 | 7.356071669 | 7.493017280 | 7.356071669 | 7.493017280 | 7.356071669 | 7.493017280 |
| METT14     | 6.786263586  | 6.529109486 | 6.740737578  | 7.955707604 | 7.058407695 | 6.99364878  | 6.99364878  | 7.316639127 | 7.050506609 | 7.214361715 | 7.140377261 | 7.009911336 | 7.733188165 | 6.119543605 | 5.669817454 | 7.360340949 | 7.63020165  | 7.400219036 |
| TAH141     | 7.287562456  | 6.871961398 | 8.014649863  | 7.127749616 | 6.520380968 | 6.520380968 | 6.520380968 | 6.520380968 | 6.520380968 | 6.520380968 | 6.520380968 | 6.520380968 | 6.520380968 | 6.520380968 | 6.520380968 | 6.520380968 | 6.520380968 | 6.520380968 |
| ZFYF1      | 5.828471587  | 6.211471239 | 6.211471239  | 6.211471239 | 6.211471239 | 6.211471239 | 6.211471239 | 6.211471239 | 6.211471239 | 6.211471239 | 6.211471239 | 6.211471239 | 6.211471239 | 6.211471239 | 6.211471239 | 6.211471239 | 6.211471239 | 6.211471239 |
| PCDD11     | 6.993453048  | 7.639651004 | 6.31466713   | 7.656492941 | 6.48624801  | 7.183598242 | 6.183598242 | 7.37357138  | 7.169291314 | 7.368979494 | 6.675024381 | 8.366705805 | 8.660154345 | 7.140659903 | 7.189358256 | 7.470245446 | 7.467549996 | 7.913062895 |
| SH2        | 7.130152077  | 7.130152077 | 7.130152077  | 7.130152077 | 7.130152077 | 7.130152077 | 7.130152077 | 7.130152077 | 7.130152077 | 7.130152077 | 7.130152077 | 7.130152077 | 7.130152077 | 7.130152077 | 7.130152077 | 7.130152077 | 7.130152077 | 7.130152077 |
| MTRF1      | 6.622845874  | 7.442314872 | 7.160865385  | 7.202087376 | 7.35655064  | 6.093540011 | 7.081552903 | 7.195453112 | 7.053952361 | 7.250249019 | 7.104529424 | 7.721307332 | 7.190448293 | 7.256564543 | 6.945293094 | 7.302489898 | 7.508671586 | 6.900055757 |
| TRAF7      | 7.458355155  | 7.740613649 | 7.914810946  | 7.740613649 | 7.914810946 | 7.740613649 | 7.914810946 | 7.740613649 | 7.914810946 | 7.740613649 | 7.914810946 | 7.740613649 | 7.914810946 | 7.740613649 | 7.914810946 | 7.740613649 | 7.914810946 | 7.740613649 |
| HLLS       | 5.865784774  | 7.611393905 | 7.085693124  | 7.846245179 | 6.88547495  | 5.86064359  | 7.156590902 | 7.340542618 | 7.30471875  | 7.711655572 | 7.19339301  | 5.904208291 | 6.334889507 | 6.981300025 | 7.932154527 | 7.64177692  | 7.265920437 | 7.767742122 |
| FUZ2       | 6.871807525  | 6.881086532 | 6.650777324  | 7.826103871 | 6.563499951 |             |             |             |             |             |             |             |             |             |             |             |             |             |

|         |             |             |              |             |             |             |             |             |             |             |             |             |             |             |             |              |             |             |
|---------|-------------|-------------|--------------|-------------|-------------|-------------|-------------|-------------|-------------|-------------|-------------|-------------|-------------|-------------|-------------|--------------|-------------|-------------|
| MOG     | 5.718579466 | 7.266878829 | 7.274641653  | 6.99908815  | 7.243709445 | 7.421210759 | 7.374850116 | 7.070638939 | 7.021934498 | 7.055411798 | 7.237059773 | 7.514222905 | 7.348595481 | 7.331459307 | 6.976576519 | 7.095442088  | 7.195612363 | 6.915953913 |
| ATG14   | 7.293631777 | 7.102123771 | 7.475393583  | 6.664123487 | 6.651104747 | 6.945741316 | 7.207659313 | 7.222168739 | 7.020082172 | 7.100208172 | 7.377093993 | 6.068558154 | 7.354465138 | 6.621954926 | 7.03866348  | 7.18853519   | 7.44203447  | 7.037135032 |
| SSBP3   | 7.479279585 | 7.384245849 | 7.357481037  | 6.795937002 | 6.959382621 | 6.983011753 | 7.454655468 | 7.394859996 | 7.197916792 | 6.885338345 | 7.359018496 | 6.079361205 | 6.354086292 | 7.290586546 | 6.894198411 | 7.092041399  | 7.014195961 | 7.063668519 |
| LETM2   | 6.567409526 | 7.028840694 | 6.681886221  | 6.611993976 | 7.116085056 | 6.92088307  | 6.636363974 | 7.651235778 | 7.235987052 | 7.481480203 | 7.172759384 | 6.751694685 | 7.208244666 | 5.928034104 | 7.72958285  | 7.482226808  | 7.649798644 | 7.781988068 |
| ZIF60   | 8.115660322 | 7.989742048 | 7.114133549  | 6.507276276 | 7.03987452  | 6.903697675 | 7.030987452 | 7.694233149 | 7.849021103 | 7.440921193 | 7.147444835 | 7.177199263 | 7.117279249 | 7.74564464  | 6.178220249 | 7.3460911819 | 7.140451528 | 7.145480831 |
| SPATAS  | 7.141600057 | 7.141600057 | 7.332032121  | 6.494891011 | 7.311259636 | 7.132178291 | 6.718802841 | 7.128953577 | 7.586381771 | 7.586381771 | 7.128953577 | 7.586381771 | 6.95605502  | 5.90262321  | 7.7121614   | 7.56758986   | 7.574937819 | 7.574937819 |
| RRP8    | 7.056338922 | 7.394087795 | 7.037214117  | 7.011234076 | 7.357092496 | 6.930036705 | 7.211340587 | 7.214818804 | 7.162264903 | 6.681799919 | 7.283704916 | 7.845236893 | 5.732670814 | 7.060958636 | 7.167965764 | 7.145958921  | 7.436570018 | 7.436570018 |
| KBBT03  | 7.462114542 | 7.438199842 | 7.461215629  | 7.125602928 | 7.016721623 | 7.719394027 | 6.965022537 | 6.825240929 | 7.316511686 | 6.727817607 | 7.712833747 | 7.474835303 | 7.428660279 | 6.971250089 | 6.384585187 | 7.074246284  | 7.074246284 | 7.074246284 |
| RNCP3   | 7.614850616 | 7.521098358 | 7.251961789  | 7.229797196 | 6.622755814 | 6.564809472 | 6.930596972 | 7.31237903  | 7.171921942 | 7.277185197 | 6.635169456 | 7.118485574 | 6.518594892 | 6.715630784 | 7.161163996 | 6.890215847  | 7.026286282 | 7.673348282 |
| SAF02   | 7.134726553 | 6.981790681 | 7.293921085  | 7.433600144 | 7.493424516 | 7.293082624 | 7.293082624 | 7.144804956 | 7.037838163 | 6.930485685 | 7.242757356 | 6.856338974 | 7.509411183 | 7.128296111 | 6.861289884 | 6.84848396   | 6.810809272 | 7.170326244 |
| MAP07   | 5.827695301 | 7.193807732 | 7.193807732  | 7.193807732 | 5.781362863 | 6.063313236 | 5.840008016 | 6.884212013 | 6.662467852 | 6.910377536 | 6.751639652 | 7.414935011 | 7.326591507 | 7.436276557 | 7.250079473 | 7.170168759  | 7.170168759 | 7.250079473 |
| HRAS    | 7.293915496 | 7.139493986 | 7.509639563  | 7.386676852 | 6.872590664 | 7.529377305 | 7.77116998  | 7.143282401 | 6.890660798 | 6.973201756 | 7.066155887 | 7.348142415 | 6.93903582  | 7.376209771 | 7.285871131 | 6.60621327   | 6.933807625 | 7.060234439 |
| IPMK    | 6.450823561 | 7.97877422  | 7.092153429  | 6.929575044 | 7.398555601 | 7.422347058 | 7.287781528 | 7.104804415 | 7.104804415 | 7.104804415 | 7.70085108  | 5.83806762  | 5.577805225 | 7.171920887 | 7.348818496 | 7.85515006   | 6.736936552 | 6.996052838 |
| DTW02   | 6.949536632 | 6.708520023 | 7.743482123  | 5.388485405 | 6.299117185 | 7.271196242 | 7.365329888 | 6.69580902  | 7.207281611 | 7.059703070 | 7.434865798 | 7.33488853  | 6.600774529 | 7.59059998  | 7.412124115 | 7.568992362  | 7.0689506   | 7.90332888  |
| AP2A1   | 7.177351485 | 6.476605222 | 6.6839374089 | 6.66632588  | 7.273095127 | 7.087417934 | 7.365353249 | 7.275601261 | 6.901954787 | 7.235137041 | 7.392517473 | 7.319317505 | 7.926652731 | 6.315484281 | 6.836630034 | 6.84701118   | 7.399944110 | 6.998496043 |
| PAFAH2  | 7.25439321  | 5.877674037 | 7.238484611  | 7.226598904 | 5.95685309  | 6.258626313 | 7.458976308 | 7.112610563 | 7.273188164 | 6.93113834  | 6.796720995 | 7.548846632 | 7.085237938 | 7.365995334 | 7.009976374 | 7.238472304  | 7.163187183 | 6.659789694 |
| SLC22AS | 7.196727291 | 6.533882991 | 7.668285937  | 7.668285937 | 7.10791957  | 7.206478086 | 6.998168938 | 6.88548702  | 7.11245261  | 6.99008063  | 6.334135673 | 5.701465574 | 7.431748879 | 7.375792304 | 7.268817620 | 7.163573209  | 7.089921309 | 7.089921309 |
| SVT1    | 8.053855103 | 8.1834876   | 6.779960983  | 5.809282557 | 5.6103267   | 7.426372633 | 7.054595775 | 6.891459392 | 7.172128743 | 7.980706155 | 7.454783874 | 6.797471794 | 7.28846543  | 7.103570836 | 7.209980856 | 6.899810471  | 6.899810471 | 6.899810471 |
| RCF2    | 7.813689195 | 6.812390512 | 6.611784561  | 7.114098022 | 7.174689835 | 5.996265421 | 7.342568729 | 7.021779534 | 6.985055773 | 7.162418999 | 7.203567673 | 7.223265889 | 5.94334447  | 6.794374505 | 7.284535856 | 6.911855454  | 7.189170961 | 7.189170961 |
| RALGAP3 | 7.737074517 | 6.169738287 | 7.871314941  | 5.807892548 | 7.417805429 | 5.66437227  | 5.466825176 | 7.674962025 | 7.506633416 | 6.837854538 | 6.981160907 | 5.459897755 | 6.389413861 | 6.048278471 | 7.293240052 | 7.472729147  | 7.520355355 | 7.99428111  |
| HSBP3   | 7.297082898 | 7.149315432 | 7.130020111  | 6.91786438  | 7.418325256 | 6.915065604 | 7.05056502  | 7.401975066 | 7.256152164 | 7.227626299 | 6.9218386   | 6.90542302  | 6.12957869  | 5.52824055  | 7.18889899  | 7.371682559  | 7.348217036 | 7.06639395  |
| NBP3    | 7.84332369  | 6.96703507  | 7.07978453   | 7.279215414 | 6.76105492  | 7.74953467  | 7.127878377 | 7.303811037 | 7.51456361  | 7.647807372 | 7.219402576 | 7.112197657 | 5.67376629  | 7.28808892  | 6.788701242 | 6.654925466  | 6.372074456 | 6.372074456 |
| MAPK12  | 6.56345076  | 6.208795647 | 5.791813325  | 7.168781608 | 7.906790422 | 8.55045011  | 6.911287132 | 7.381562659 | 6.976180386 | 7.10086678  | 6.323210246 | 8.027399718 | 7.183576485 | 7.912778753 | 7.560608063 | 7.815719588  | 7.287194966 | 6.806625652 |
| S1PR4   | 7.12345267  | 7.514669088 | 7.624875311  | 7.624875311 | 7.92945874  | 6.165218445 | 6.94903747  | 7.1796491   | 7.549184895 | 7.197972465 | 7.528033312 | 6.72806409  | 6.741791217 | 7.542600989 | 7.19026578  | 7.19026578   | 6.966235715 | 6.966235715 |
| TMTCS   | 7.500992515 | 7.610776816 | 7.267024828  | 6.467162927 | 7.13579993  | 6.941098217 | 7.13579993  | 7.065905854 | 7.065905854 | 7.065905854 | 7.090446942 | 6.536160155 | 5.94872468  | 6.823790667 | 7.285239052 | 7.199291874  | 7.06543096  | 7.334399956 |
| HRH4L2  | 7.37834264  | 7.069882803 | 7.716903242  | 7.199378019 | 7.16888982  | 7.472626576 | 6.986594712 | 7.012951816 | 6.982108126 | 7.267884563 | 7.287527458 | 7.206079508 | 6.31307414  | 6.888929369 | 6.826778081 | 7.66647369   | 7.21311469  | 7.21311469  |
| RP6KAC  | 5.778995061 | 7.192373109 | 6.215258456  | 7.781013978 | 5.849011554 | 6.086204311 | 6.486733694 | 7.609773908 | 8.005256384 | 7.197884991 | 7.062788227 | 6.438786007 | 7.909185671 | 6.314760915 | 7.348784562 | 7.143484305  | 7.09912647  | 7.09912647  |
| RAC1    | 8.327412953 | 8.274510077 | 6.271650978  | 7.403729355 | 7.83350099  | 6.158046894 | 6.87149362  | 6.937109862 | 6.841744596 | 6.91785862  | 7.07060003  | 6.47682558  | 7.37044268  | 5.19697217  | 6.31887961  | 6.311795124  | 6.311795124 | 6.311795124 |
| ATAD3C  | 7.131620187 | 7.097940688 | 7.359884372  | 7.097940688 | 7.359884372 | 7.097940688 | 7.359884372 | 7.097940688 | 7.359884372 | 7.097940688 | 7.062778794 | 7.038903003 | 7.138451628 | 6.073607945 | 7.043601153 | 7.1258951983 | 7.27284468  | 7.078929511 |
| CEP25   | 7.643069809 | 5.929701146 | 7.742022698  | 7.278699709 | 7.096786277 | 6.257337553 | 7.710439881 | 6.910792535 | 6.999811431 | 7.149728676 | 7.170111502 | 8.124258684 | 6.248661126 | 6.316808655 | 6.665920477 | 7.0581673    | 7.585766924 | 7.211088426 |
| KIF12   | 6.882066804 | 5.882664313 | 6.068531044  | 6.98207795  | 7.837056947 | 7.837056947 | 7.837056947 | 7.837056947 | 7.837056947 | 7.837056947 | 7.043403734 | 6.106811255 | 7.557514526 | 5.614163644 | 6.797218593 | 7.727564227  | 7.842031211 | 8.167775303 |
| CLIP207 | 6.884410009 | 7.755287225 | 7.483931836  | 7.67160653  | 7.46975396  | 7.07598599  | 7.08601261  | 7.235111426 | 6.757636691 | 7.023722261 | 7.729999183 | 7.29755921  | 8.238464091 | 6.203247324 | 7.179785805 | 6.694025670  | 6.860031696 | 7.493949394 |
| PTCH1   | 7.967242302 | 6.641659016 | 7.021952488  | 6.914596951 | 6.986380866 | 6.3956741   | 6.839984758 | 7.48657392  | 7.341819157 | 7.366023519 | 6.882859381 | 5.983641099 | 6.39661003  | 7.24323025  | 7.463182463 | 7.66543998   | 7.39158212  | 7.39158212  |
| SNX11   | 7.054393086 | 8.136317108 | 6.420905337  | 8.003623583 | 7.372193076 | 7.30665167  | 7.017962314 | 6.882544699 | 7.296490393 | 7.293400305 | 6.967926292 | 6.761468858 | 5.939300043 | 6.313158323 | 6.995289227 | 7.261361554  | 7.29796397  | 7.910051724 |
| CDK5    | 8.327412953 | 8.274510077 | 6.271650978  | 7.403729355 | 7.83350099  | 6.158046894 | 6.87149362  | 6.937109862 | 6.841744596 | 6.91785862  | 7.07060003  | 6.47682558  | 7.37044268  | 5.19697217  | 6.31887961  | 6.311795124  | 6.311795124 | 6.311795124 |
| SNAPB   | 7.608656454 | 7.103292702 | 7.410898385  | 7.779737246 | 7.119398385 | 7.779737246 | 7.119398385 | 7.779737246 | 7.119398385 | 7.779737246 | 7.407606337 | 7.149397184 | 8.262616466 | 6.82387662  | 6.814927285 | 7.06212226   | 7.048133938 | 6.981369187 |
| MC1R    | 7.28812713  | 7.116916135 | 6.291605364  | 7.297095319 | 6.324847638 | 7.62900274  | 6.705946863 | 7.36351069  | 6.990216327 | 6.875054036 | 7.218485939 | 7.637932443 | 9.727212218 | 6.453458993 | 7.306787988 | 7.09916182   | 7.02435035  | 7.066218998 |
| SLC41A1 | 7.659612337 | 7.736851178 | 7.37971727   | 7.129737192 | 7.129737192 | 7.577302975 | 7.089287376 | 7.38251012  | 7.089287376 | 7.38251012  | 7.44676393  | 6.824623105 | 5.58373659  | 5.574177664 | 7.970463372 | 7.03328901   | 7.129307215 | 7.647406369 |
| POLR3F  | 7.090282516 | 6.963863305 | 7.668683807  | 6.836148094 | 7.510737932 | 5.893690328 | 7.933318816 | 6.978749454 | 7.279734106 | 7.287048147 | 6.679628202 | 7.302607066 | 5.957661806 | 7.70692765  | 7.042261885 | 7.164052935  | 6.883263869 | 7.277983117 |
| ZNF83   | 7.220124216 | 7.003337043 | 6.779699894  | 7.632732697 | 7.552725637 | 7.04966901  | 8.134379047 | 7.857614012 | 7.082588846 | 6.596617684 | 7.082588846 | 6.596617684 | 6.89933787  | 6.100090757 | 7.167039869 | 7.63440189   | 7.08597118  | 7.25459321  |
| KBTB07  | 7.550233691 | 5.834076165 | 8.340217752  | 7.438132448 | 7.548693383 | 7.039293585 | 7.728408469 | 7.682688426 | 6.696805137 | 7.212385394 | 6.72180888  | 7.266570235 | 5.489468776 | 5.754757045 | 7.807934566 | 7.707793375  | 7.697791352 | 7.697791352 |
| RFBP2   | 6.580451007 | 5.538860751 | 7.21447252   | 6.580451007 | 5.538860751 | 7.21447252  | 6.580451007 | 5.538860751 | 7.21447252  | 6.580451007 | 6.58        |             |             |             |             |              |             |             |



|          |             |              |              |             |             |              |              |              |             |             |              |             |              |             |             |             |             |             |
|----------|-------------|--------------|--------------|-------------|-------------|--------------|--------------|--------------|-------------|-------------|--------------|-------------|--------------|-------------|-------------|-------------|-------------|-------------|
| ZNF490   | 6.495359165 | 7.345693574  | 6.359779613  | 5.854939396 | 6.120844526 | 6.009416267  | 7.615703847  | 7.430871004  | 6.874172355 | 7.26225055  | 6.523424227  | 6.071270661 | 7.111272525  | 7.175083437 | 7.738402349 | 7.465151124 | 7.405354521 | 7.079654823 |
| NEU3     | 6.190992478 | 6.4447295736 | 7.434868358  | 5.90188509  | 6.50364231  | 7.215569056  | 7.106888352  | 7.143304663  | 6.510873449 | 7.301080005 | 7.313422558  | 5.896215568 | 7.178335465  | 6.741836058 | 7.214950328 | 7.017394368 | 7.088399502 | 7.178266949 |
| METL22   | 6.217763579 | 6.852867189  | 5.616829638  | 5.924280042 | 6.999893261 | 7.086294876  | 7.073977174  | 7.662035687  | 7.104190447 | 7.178423783 | 7.422423561  | 7.081809958 | 5.6141537    | 7.395743768 | 7.531754945 | 6.742272663 | 7.265322884 | 6.739746449 |
| PKR3R    | 5.734032547 | 5.923698402  | 5.800659127  | 5.573586792 | 6.922668988 | 7.13889149   | 5.540164378  | 7.938898037  | 6.701310486 | 6.975654065 | 6.881188992  | 7.260894162 | 7.513195208  | 7.713958486 | 8.150631628 | 7.627654911 | 7.534309234 | 7.276098817 |
| ADGR1C   | 6.821932559 | 6.628316258  | 6.795132505  | 7.20113105  | 7.059867717 | 7.253731515  | 6.832974421  | 7.294377801  | 6.970144111 | 7.204378019 | 7.017416589  | 7.172131549 | 6.880582364  | 6.82276568  | 7.218915866 | 6.82276568  | 6.732127724 | 7.229616085 |
| PLAZA6B  | 6.705234923 | 6.754857802  | 7.044862194  | 6.725823293 | 6.769783953 | 7.21244206   | 7.212019238  | 7.68129556   | 6.855380984 | 5.713009308 | 6.855133898  | 7.243435058 | 7.120452487  | 6.71195165  | 6.847219617 | 7.17342039  | 7.584694283 | 6.753414763 |
| GRM4     | 5.640997923 | 7.781538196  | 5.527519668  | 5.695346993 | 7.098285899 | 7.31516811   | 7.364823306  | 6.507614947  | 7.088144048 | 6.934728874 | 7.568687289  | 7.616956582 | 7.706940094  | 7.549124879 | 6.320450512 | 7.202392028 | 6.531741647 | 6.891954548 |
| INP5F    | 7.344804935 | 7.417194464  | 6.741794464  | 6.165843954 | 7.527470239 | 6.165835554  | 7.6731411278 | 7.169154424  | 7.322847538 | 6.974278456 | 7.595667574  | 7.038129528 | 7.017039115  | 7.007306972 | 6.959430624 | 7.221963054 | 6.689936475 | 7.128974506 |
| CLIC3    | 6.383066642 | 6.402586212  | 6.869432559  | 6.584290296 | 7.359331241 | 7.5651252118 | 7.640880156  | 6.61489121   | 6.616027338 | 7.187251884 | 6.81152533   | 8.037762491 | 7.489744195  | 7.593007238 | 6.900384824 | 7.095414746 | 7.298273786 | 7.088873043 |
| CERS4    | 7.500923312 | 6.499484677  | 6.499484677  | 6.512884774 | 7.505544826 | 7.505544826  | 7.881889368  | 6.7117259215 | 7.107209004 | 7.000109889 | 7.680575341  | 6.821440809 | 7.644433821  | 7.699427427 | 6.924060957 | 6.83943619  | 6.728329565 | 7.02214231  |
| RAB4B    | 7.122783675 | 7.224367378  | 7.224367378  | 6.658987338 | 7.337687042 | 7.276194192  | 5.874299148  | 6.962977645  | 7.110179901 | 6.962977645 | 7.110179901  | 6.962977645 | 7.110179901  | 6.962977645 | 7.110179901 | 6.962977645 | 7.110179901 | 6.962977645 |
| CFP2R1   | 7.620551484 | 7.095511154  | 5.589481268  | 7.328847365 | 6.829847662 | 6.257957716  | 7.249323906  | 7.185647305  | 7.123570295 | 7.160275377 | 7.328847365  | 7.451822505 | 5.741510681  | 5.885703739 | 6.834303767 | 7.074715096 | 7.105904001 | 6.694776617 |
| AC11     | 6.96077257  | 5.910717356  | 5.786651455  | 7.524048991 | 5.764522964 | 7.050155607  | 7.341097603  | 7.11515148   | 6.483978771 | 7.315395353 | 7.784698397  | 7.019379971 | 7.429399712  | 7.123346441 | 6.906463441 | 7.815338673 |             |             |
| TA1F     | 6.608676505 | 6.282641559  | 6.47685576   | 6.575267315 | 6.514982675 | 6.913498815  | 7.602104399  | 7.476907918  | 6.87256286  | 7.33295614  | 7.02863511   | 7.150388119 | 6.62323641   | 7.163861923 | 7.298720385 | 7.454391033 | 7.727990952 | 6.979773217 |
| FAH      | 6.797166393 | 6.013488165  | 7.750506245  | 6.735722708 | 6.750506245 | 6.735722708  | 6.861990712  | 7.111038793  | 7.111038793 | 7.002874879 | 6.929100823  | 7.444416379 | 6.104758962  | 7.038559191 | 7.084928103 | 7.320227876 | 6.699766995 |             |
| XK       | 6.649681959 | 7.220624546  | 6.675835335  | 7.554096656 | 7.831817181 | 6.403219629  | 7.188935358  | 6.552053322  | 7.118962139 | 7.044117563 | 6.909124851  | 7.68621152  | 7.718066749  | 6.298413593 | 6.909870252 | 7.286886779 | 7.260371919 | 7.059128591 |
| BMF      | 6.162292305 | 6.623209956  | 5.975604858  | 7.780886623 | 6.305094332 | 7.240858003  | 7.255676027  | 7.18283183   | 7.058803575 | 6.87031517  | 6.376932352  | 7.245340093 | 6.306878843  | 7.481983054 | 6.955852161 | 7.297348119 | 7.117050303 |             |
| RFCS     | 6.774521231 | 7.34406059   | 8.043155729  | 7.487024198 | 7.140955004 | 6.945966499  | 8.069693127  | 7.279318141  | 6.915781511 | 7.018828474 | 6.806558661  | 6.971713171 | 7.625353551  | 7.950842424 | 7.048365989 | 7.126401129 | 7.347189197 | 7.276456934 |
| Cl40r169 | 7.569034775 | 5.75920237   | 7.563890607  | 6.999790008 | 7.346119751 | 7.5203266    | 7.119131382  | 7.102287471  | 7.102287471 | 7.102287471 | 7.102287471  | 7.102287471 | 7.102287471  | 7.102287471 | 7.102287471 | 7.102287471 | 7.102287471 | 7.102287471 |
| MAS74    | 7.481131869 | 6.480947375  | 6.402177099  | 7.511733957 | 5.815757374 | 7.11785729   | 6.240940341  | 8.095686644  | 7.055945823 | 7.498106143 | 7.507240614  | 6.91616549  | 6.4240172521 | 5.892688887 | 7.776876182 | 7.295580375 | 6.92967712  | 7.957194308 |
| STR3     | 7.12302431  | 5.59383394   | 5.79867959   | 8.457694652 | 5.80181311  | 6.640868314  | 7.397175021  | 7.59343553   | 7.063898999 | 6.44029152  | 6.97953464   | 7.62864862  | 7.0755904    | 6.868651508 | 7.554023178 | 6.934851879 |             |             |
| FAM175B  | 7.118859356 | 8.261650229  | 6.86714707   | 8.0915873   | 6.588134263 | 6.268962652  | 6.79387801   | 7.473230368  | 7.18923958  | 6.85734696  | 6.51619382   | 7.10843375  | 6.540479252  | 7.038162709 | 7.367596962 | 7.053085365 | 7.186781035 |             |
| POLR1E   | 6.911444774 | 7.775540722  | 5.958590825  | 7.665655856 | 7.059259624 | 7.11171465   | 7.64498316   | 7.222747342  | 7.365757844 | 6.902880252 | 7.304222421  | 7.459832758 | 7.350577999  | 5.54381555  | 6.47679027  | 7.569519869 | 6.72617307  | 6.335855438 |
| FAM210A  | 6.812915531 | 7.214248833  | 6.3681350973 | 6.612546512 | 7.074782533 | 7.238857376  | 8.003916962  | 6.541169689  | 7.004054819 | 7.004054819 | 7.445213924  | 7.452300115 | 6.75854129   | 7.782143416 | 6.521577945 | 6.765738887 | 7.159491858 | 6.630636032 |
| FCHS01D  | 6.864795055 | 5.864877115  | 6.791131403  | 6.800384529 | 7.023794975 | 6.635501308  | 6.882303085  | 7.205411632  | 6.882303085 | 7.146870585 | 6.991236887  | 6.966129603 | 8.017036464  | 7.587447501 | 7.305380918 | 7.2234558   | 7.427570711 | 7.88533647  |
| HST12HAZ | 7.614447753 | 7.698420762  | 7.614447753  | 7.094771628 | 7.136224005 | 6.685015688  | 6.164466427  | 7.320879723  | 8.2601381   | 6.945105108 | 6.98133066   | 7.70355922  | 6.662675051  | 6.119253792 | 7.22707697  | 6.798341756 | 7.079499972 | 7.04136644  |
| MYO3B    | 6.940466104 | 6.457396124  | 7.37978846   | 6.145223584 | 6.365673533 | 6.778173895  | 7.210717177  | 7.345913035  | 7.63491802  | 7.204924093 | 6.950741673  | 7.962394204 | 6.829554886  | 6.220895119 | 7.264000788 | 7.89126     | 7.75412944  | 6.898984862 |
| TKAF1    | 6.821932559 | 6.628316258  | 6.795132505  | 7.20113105  | 7.059867717 | 7.253731515  | 6.832974421  | 7.294377801  | 6.970144111 | 7.204378019 | 7.017416589  | 7.172131549 | 6.880582364  | 6.82276568  | 7.218915866 | 6.82276568  | 6.732127724 | 7.229616085 |
| NTRCC    | 6.453278209 | 6.038423961  | 6.364570344  | 6.196517445 | 7.906966178 | 6.449546134  | 7.537086725  | 7.171621052  | 7.083101303 | 6.519023325 | 6.94897123   | 6.949140651 | 6.598928797  | 6.808397386 | 6.513804892 | 7.127128245 | 6.836771458 |             |
| SNAPC1   | 6.859885727 | 8.212792532  | 6.786139203  | 7.612748853 | 7.065421076 | 7.301010852  | 7.031437394  | 7.310315479  | 7.213729344 | 7.021519026 | 7.535411515  | 7.628810574 | 7.641542069  | 7.094636805 | 6.986699343 | 6.831689793 | 7.112199208 |             |
| FORKED2  | 6.634276572 | 7.639394989  | 6.634276572  | 6.746720167 | 7.066317673 | 6.567479831  | 6.421773249  | 7.145744644  | 6.421773249 | 7.132543366 | 7.1393916492 | 7.01724291  | 8.542551486  | 8.479308075 | 7.050122771 | 7.50295189  | 7.09347875  | 7.117050303 |
| ZNF83    | 7.296819012 | 7.594009716  | 7.406340119  | 7.222762723 | 7.941387709 | 7.659051325  | 6.937381219  | 7.230324274  | 6.920980084 | 7.468587523 | 7.031994477  | 6.978888152 | 6.750789883  | 6.329513037 | 6.77770736  | 6.683744434 | 7.126460911 | 7.60193165  |
| MICA     | 6.712758971 | 7.39088368   | 7.39088368   | 7.074818353 | 6.434578015 | 6.434578015  | 6.804559322  | 7.180205703  | 7.048137304 | 7.083179338 | 6.301034964  | 7.400498373 | 8.03075872   | 7.096280177 | 6.907151824 | 6.885027873 | 6.897707315 |             |
| RANBP3   | 7.371272248 | 7.178888805  | 7.216238596  | 7.209306043 | 7.19592565  | 7.210728778  | 7.454439007  | 7.028974247  | 6.778447747 | 6.799119846 | 7.63478888   | 7.038311385 | 7.119190608  | 7.326262502 | 6.963166446 | 6.900735463 | 6.990836084 | 6.822946648 |
| FOXF2    | 5.102796636 | 7.18717425   | 5.022948567  | 5.022948567 | 5.022948567 | 5.022948567  | 5.022948567  | 5.022948567  | 5.022948567 | 5.022948567 | 5.022948567  | 5.022948567 | 5.022948567  | 5.022948567 | 5.022948567 | 5.022948567 | 5.022948567 | 5.022948567 |
| RNP3     | 6.742768649 | 7.641626165  | 7.641626165  | 6.742768649 | 6.742768649 | 6.742768649  | 6.742768649  | 6.742768649  | 6.742768649 | 6.742768649 | 6.742768649  | 6.742768649 | 6.742768649  | 6.742768649 | 6.742768649 | 6.742768649 | 6.742768649 | 6.742768649 |
| KRT8     | 6.411317526 | 8.20900221   | 7.83597343   | 7.868988498 | 7.588545966 | 7.369717058  | 6.514250666  | 7.66355774   | 6.548655372 | 6.965002077 | 7.6940013292 | 7.183189796 | 6.353630547  | 5.876871697 | 9.043974861 | 6.403030124 | 6.84291155  | 11.67443372 |
| HAR1B    | 6.965064094 | 6.965064094  | 6.965064094  | 6.965064094 | 6.965064094 | 6.965064094  | 6.965064094  | 6.965064094  | 6.965064094 | 6.965064094 | 6.965064094  | 6.965064094 | 6.965064094  | 6.965064094 | 6.965064094 | 6.965064094 | 6.965064094 | 6.965064094 |
| TRPM4    | 7.393549229 | 6.98429405   | 7.597482872  | 7.126771789 | 7.523089978 | 7.195212311  | 7.059800756  | 7.635725147  | 7.176674913 | 7.088668081 | 7.41856897   | 6.350435856 | 6.920030536  | 8.811451262 | 6.853455659 | 6.549813641 | 6.483938687 | 7.506776658 |
| RRP9     | 6.723004929 | 6.984901061  | 6.694901061  | 6.723004929 | 6.694901061 | 6.694901061  | 6.723004929  | 6.694901061  | 6.694901061 | 6.694901061 | 6.694901061  | 6.694901061 | 6.694901061  | 6.694901061 | 6.694901061 | 6.694901061 | 6.694901061 | 6.694901061 |
| PWWP2B   | 7.45998225  | 7.546624942  | 6.89515737   | 6.89515737  | 6.89515737  | 6.89515737   | 6.89515737   | 6.89515737   | 6.89515737  | 6.89515737  | 6.89515737   | 6.89515737  | 6.89515737   | 6.89515737  | 6.89515737  | 6.89515737  | 6.89515737  | 6.89515737  |
| GEM      | 5.297845328 | 5.687604209  | 5.285911971  | 5.386762158 | 5.657589777 | 5.78230665   | 5.500260292  | 7.477971771  | 7.511627835 | 7.070000431 | 7.020593185  | 6.365174    | 7.073201612  | 7.749586612 | 7.748580961 | 6.902862758 | 7.2         |             |



|            |             |             |             |             |              |             |             |             |             |             |             |             |             |             |             |             |             |             |
|------------|-------------|-------------|-------------|-------------|--------------|-------------|-------------|-------------|-------------|-------------|-------------|-------------|-------------|-------------|-------------|-------------|-------------|-------------|
| ZNF182     | 7.017672391 | 6.243262307 | 5.576154783 | 7.165395573 | 7.806052966  | 5.587344311 | 6.43105763  | 6.97248371  | 7.62522393  | 6.990924192 | 7.183975276 | 7.535697431 | 6.693653961 | 7.396781697 | 7.008832691 | 7.162023763 | 7.16224712  | 6.444242674 |
| ZNF71618   | 7.466646362 | 7.848248391 | 6.501929624 | 7.630412372 | 7.802911447  | 7.548329173 | 6.468046058 | 6.969555417 | 7.016988008 | 7.477220112 | 6.630579895 | 7.031845849 | 6.439767772 | 6.492832614 | 7.097350398 | 7.004044480 | 7.155460386 | 6.792320105 |
| ZNF170     | 6.291941652 | 6.891112238 | 6.691464545 | 7.680423729 | 7.046488167  | 5.58971091  | 6.785353628 | 7.027268915 | 7.224248451 | 6.739272246 | 7.29909636  | 6.710251815 | 6.724617337 | 6.375644643 | 6.974753073 | 7.269924759 | 6.69898808  | 7.407428699 |
| Clorf131   | 7.152656143 | 6.96493996  | 8.197324018 | 7.515409932 | 7.237175451  | 6.613915973 | 6.780895079 | 7.026877823 | 6.794190096 | 6.906118048 | 6.638544478 | 7.767878539 | 7.234449991 | 6.168874567 | 7.126672303 | 6.992244103 | 7.160233873 | 6.619026469 |
| Gorf25     | 7.117991628 | 7.06304532  | 7.103109834 | 6.796111237 | 7.149023341  | 7.114009048 | 6.83857831  | 7.100991299 | 6.783873455 | 6.783873455 | 6.974126725 | 7.074432705 | 7.064411415 | 7.158973795 | 6.843573245 | 6.98667976  | 6.733399392 | 6.733399392 |
| ZIC20A2    | 6.844654541 | 6.96243988  | 6.986427356 | 6.986427356 | 6.986427356  | 6.986427356 | 6.986427356 | 6.986427356 | 6.986427356 | 6.986427356 | 6.986427356 | 6.986427356 | 6.986427356 | 6.986427356 | 6.986427356 | 6.986427356 | 6.986427356 | 6.986427356 |
| GALN24     | 5.734348032 | 7.137021543 | 6.509232615 | 7.493134345 | 5.82980662   | 6.630450022 | 7.522622722 | 6.754777526 | 6.784718257 | 6.57215607  | 7.017231256 | 6.466431321 | 5.759665312 | 7.000117719 | 6.74312589  | 7.357615851 | 7.124311605 | 7.893941214 |
| FIZ1       | 7.834304257 | 6.296559753 | 7.457766443 | 7.457766443 | 7.457766443  | 7.457766443 | 7.457766443 | 7.457766443 | 7.457766443 | 7.457766443 | 7.457766443 | 7.457766443 | 7.457766443 | 7.457766443 | 7.457766443 | 7.457766443 | 7.457766443 | 7.457766443 |
| DDX28      | 7.561178901 | 5.532857893 | 7.578532845 | 6.901458945 | 7.276370032  | 7.37628194  | 7.116424276 | 6.75604764  | 6.910175662 | 7.144765785 | 6.996848329 | 7.933207184 | 5.537947449 | 7.427064462 | 6.174521413 | 6.565320483 | 6.735915634 | 7.017801586 |
| PATL1      | 7.095107505 | 6.944274609 | 7.03225514  | 6.430928447 | 6.532101935  | 7.545509081 | 6.667168297 | 7.479196488 | 7.166793975 | 6.818394778 | 6.959491208 | 7.144709449 | 7.561352634 | 6.635986048 | 6.939101543 | 7.14154278  | 6.939101543 | 7.23959974  |
| KFC2       | 6.587961665 | 6.37255052  | 7.106673054 | 7.62181781  | 6.925711603  | 7.200909333 | 7.152438887 | 7.015217704 | 6.747768491 | 6.766793975 | 6.766793975 | 6.766793975 | 6.766793975 | 6.766793975 | 6.766793975 | 6.766793975 | 6.766793975 | 6.766793975 |
| CTC-435M10 | 7.112003476 | 7.144035451 | 7.829473128 | 7.532036691 | 5.828002036  | 6.81605766  | 7.154572747 | 6.88305362  | 7.174914263 | 6.55425646  | 6.89695885  | 5.664752635 | 8.146479897 | 6.483433743 | 7.254865706 | 6.898872841 | 7.05476811  | 6.843573245 |
| ZNF54      | 6.78991094  | 8.081684835 | 7.779691165 | 7.1614317   | 6.234476892  | 7.781931309 | 8.02389641  | 7.129146651 | 6.855020311 | 6.88124062  | 6.55991277  | 7.910814626 | 7.60782357  | 5.957830109 | 7.339749245 | 6.822627513 | 6.84935434  | 6.695343136 |
| PXC01      | 7.819715086 | 7.31348906  | 7.149825885 | 6.942931589 | 5.927749627  | 7.487028202 | 6.683700052 | 7.671577607 | 6.618950027 | 7.115213025 | 6.616442655 | 6.585145378 | 7.205073761 | 6.940834539 | 7.06943941  | 6.888239345 | 7.257372579 | 6.888239345 |
| CTC206ff   | 6.544183051 | 6.946299735 | 7.132730937 | 7.475376865 | 6.810992238  | 8.026876902 | 6.88430756  | 6.741223142 | 7.088278872 | 7.13946047  | 6.942421384 | 7.025466017 | 7.764735976 | 6.804584329 | 6.983238232 | 7.592483951 | 7.3930093   | 6.865383077 |
| STAR1D3    | 6.66055774  | 6.526380421 | 7.276430157 | 5.430241794 | 5.84781106   | 6.389336017 | 6.34380125  | 7.27775315  | 6.853823961 | 7.824473294 | 6.76002571  | 6.264002571 | 5.764721289 | 6.574971651 | 7.175316394 | 7.253982901 | 7.66526595  | 6.66526595  |
| UTS2B      | 6.334858086 | 7.077377476 | 7.492796056 | 7.039527484 | 6.986878747  | 7.048322075 | 6.963757709 | 6.766674779 | 6.952242655 | 6.58045999  | 8.017195493 | 7.543344897 | 7.319749817 | 6.844054319 | 7.084916491 | 7.638931487 | 7.091170015 | 7.091170015 |
| AC027      | 5.971823498 | 6.450437626 | 7.758821218 | 7.53719253  | 7.616853181  | 7.816937924 | 6.889729254 | 7.609521558 | 7.093222441 | 7.047878369 | 6.845866143 | 6.808116164 | 6.346989372 | 6.959022424 | 7.349175391 | 7.779151505 | 6.805164035 | 6.805164035 |
| MARVELD2   | 6.560532081 | 6.529677877 | 7.287176691 | 7.649796262 | 6.094262656  | 7.595597693 | 7.998904763 | 7.002878574 | 7.280816175 | 7.003654364 | 7.054222213 | 7.730682598 | 6.512013636 | 6.575710016 | 6.779340968 | 6.877050731 | 6.452757038 | 6.452757038 |
| DK01       | 7.384036518 | 7.507369595 | 7.250945421 | 7.574920215 | 7.536548244  | 7.239044203 | 6.611368889 | 7.148549712 | 6.826943872 | 6.898929294 | 6.869866696 | 7.293057933 | 7.070149776 | 6.934149395 | 6.795938069 | 7.00224831  | 7.00224831  | 7.00224831  |
| TEC41      | 7.887297662 | 7.23405057  | 7.268002441 | 7.474577851 | 6.09908084   | 7.158986154 | 7.012656409 | 6.916289204 | 6.833182064 | 6.978287956 | 6.878297511 | 6.629709811 | 6.113750429 | 6.808383661 | 6.894011045 | 7.09105862  | 7.117531769 | 6.827324254 |
| FAM104B    | 6.37397806  | 7.30084252  | 7.682245824 | 7.460611927 | 6.83505334   | 6.816482772 | 7.361518677 | 6.957852465 | 7.126867094 | 6.83350871  | 7.20006423  | 7.250158376 | 7.765040633 | 6.734183077 | 6.706672389 | 6.935170988 | 7.047718629 | 6.792222224 |
| KANS11L    | 6.894503681 | 6.954531614 | 7.596583192 | 6.298937712 | 6.758812219  | 7.067853406 | 6.87895733  | 7.348832598 | 6.629709811 | 7.313489497 | 7.263954563 | 6.613750429 | 6.808383661 | 6.894011045 | 7.09105862  | 7.117531769 | 6.827324254 | 6.827324254 |
| PON2       | 7.418309827 | 7.677048547 | 6.063093067 | 6.844451967 | 6.99804962   | 7.005175831 | 6.734908358 | 7.160442248 | 6.726121931 | 6.930316972 | 6.294345763 | 6.41280323  | 7.215933254 | 7.216304851 | 6.21184587  | 6.168859072 | 6.366498815 | 6.366498815 |
| LIRC57     | 7.140301375 | 7.061159968 | 7.263132456 | 6.076704025 | 6.723396367  | 6.723396367 | 6.723396367 | 6.723396367 | 6.723396367 | 6.723396367 | 6.723396367 | 6.723396367 | 6.723396367 | 6.723396367 | 6.723396367 | 6.723396367 | 6.723396367 | 6.723396367 |
| ABC81      | 7.394001375 | 7.409674751 | 7.25624732  | 6.98243694  | 7.347756666  | 6.995374845 | 6.523866612 | 6.898705768 | 7.72643417  | 6.351171157 | 6.895820611 | 7.206808008 | 7.020000444 | 6.797235866 | 6.019134417 | 7.384734324 | 6.45169086  | 6.392304817 |
| EPB11L     | 7.258056642 | 6.871981911 | 6.871981911 | 6.871981911 | 6.871981911  | 6.871981911 | 6.871981911 | 6.871981911 | 6.871981911 | 6.871981911 | 6.871981911 | 6.871981911 | 6.871981911 | 6.871981911 | 6.871981911 | 6.871981911 | 6.871981911 | 6.871981911 |
| NI7        | 7.637950203 | 7.669972537 | 7.168449706 | 7.23186007  | 6.937164116  | 7.548272576 | 6.894485254 | 7.246708983 | 7.035344333 | 7.73314668  | 7.421072898 | 6.767213757 | 5.857619954 | 6.930014966 | 6.962184066 | 7.235418639 | 6.812271116 | 6.236640462 |
| PF04N      | 7.322793087 | 7.018832659 | 7.497437165 | 7.018832659 | 7.497437165  | 7.497437165 | 7.497437165 | 7.497437165 | 7.497437165 | 7.497437165 | 7.497437165 | 7.497437165 | 7.497437165 | 7.497437165 | 7.497437165 | 7.497437165 | 7.497437165 | 7.497437165 |
| TCPH       | 7.316314213 | 7.547976829 | 6.050578919 | 7.029727271 | 7.65464037   | 7.179847399 | 7.455034532 | 7.048561493 | 6.931481135 | 7.407813907 | 6.914858077 | 7.242212722 | 7.171069144 | 6.511699363 | 7.053199783 | 6.949172682 | 6.965386703 | 7.256464889 |
| TPAL       | 7.174240868 | 7.716399848 | 6.86846291  | 5.787937326 | 5.9644862    | 5.942448274 | 7.114602134 | 7.327089993 | 7.300540486 | 6.072283025 | 6.587051213 | 6.188031068 | 7.443212341 | 6.913397398 | 7.079663491 | 7.726476285 | 7.726476285 | 7.726476285 |
| GAT8       | 7.646549345 | 6.981297953 | 5.901981888 | 7.32678941  | 6.8811012815 | 5.858185048 | 6.020552371 | 6.861267325 | 7.185654665 | 7.024936607 | 7.239746633 | 7.147349901 | 7.51409789  | 5.634280466 | 6.857294233 | 7.349685724 | 7.349685724 | 7.098873049 |
| BORA       | 6.602618011 | 6.512727799 | 7.258470289 | 6.357449289 | 6.357449289  | 6.357449289 | 6.357449289 | 6.357449289 | 6.357449289 | 6.357449289 | 6.357449289 | 6.357449289 | 6.357449289 | 6.357449289 | 6.357449289 | 6.357449289 | 6.357449289 | 6.357449289 |
| ZXD        | 6.568815863 | 6.688502229 | 6.210172972 | 7.353971975 | 5.56515216   | 7.421802725 | 7.311059488 | 7.789363077 | 6.753506561 | 6.969274918 | 7.76702734  | 5.972447877 | 5.400642742 | 5.748272524 | 7.926331913 | 5.157272117 | 7.008023179 | 7.019259287 |
| R1P1-286N2 | 7.613800595 | 7.065824660 | 7.179109388 | 6.618395692 | 7.450847053  | 7.178841619 | 6.841839569 | 6.69936462  | 6.818395692 | 6.73822381  | 7.38222381  | 7.650226085 | 6.743547454 | 6.585964668 | 6.849994468 | 7.004861496 | 6.631313215 | 6.631313215 |
| PIGB       | 6.776429478 | 7.426427513 | 7.080967482 | 7.480206121 | 6.515650044  | 7.264423305 | 7.376389619 | 6.729050187 | 6.850557119 | 6.964784321 | 7.163966609 | 6.47930542  | 6.916533898 | 7.358179031 | 6.706861865 | 6.989071529 | 6.998918275 | 7.166837477 |
| TAFL       | 6.108354617 | 6.520681344 | 6.208824213 | 6.108354617 | 6.520681344  | 6.208824213 | 6.208824213 | 6.208824213 | 6.208824213 | 6.208824213 | 6.208824213 | 6.208824213 | 6.208824213 | 6.208824213 | 6.208824213 | 6.208824213 | 6.208824213 | 6.208824213 |
| SIC25A37   | 7.104445283 | 6.19733925  | 6.208824213 | 6.081265033 | 6.081265033  | 6.081265033 | 6.081265033 | 6.081265033 | 6.081265033 | 6.081265033 | 6.081265033 | 6.081265033 | 6.081265033 | 6.081265033 | 6.081265033 | 6.081265033 | 6.081265033 | 6.081265033 |
| ZNF614     | 7.195853939 | 6.75948518  | 6.75948518  | 6.75948518  | 6.75948518   | 6.75948518  | 6.75948518  | 6.75948518  | 6.75948518  | 6.75948518  | 6.75948518  | 6.75948518  | 6.75948518  | 6.75948518  | 6.75948518  | 6.75948518  | 6.75948518  | 6.75948518  |
| ANK1       | 6.84213828  | 7.871651139 | 7.037937713 | 7.428696002 | 5.13079035   | 6.13079035  | 7.009742002 | 6.176439287 | 6.456903612 | 7.101618174 | 6.469212195 | 5.14441097  | 5.994747374 | 6.95545687  | 5.83754028  | 7.127034809 | 6.126663937 | 6.126663937 |
| ZNF116     | 6.893148538 | 6.893148538 | 6.893148538 | 6.893148538 | 6.893148538  | 6.893148538 | 6.893148538 | 6.893148538 | 6.893148538 | 6.893148538 | 6.893148538 | 6.893148538 | 6.893148538 | 6.893148538 | 6.893148538 | 6.893148538 | 6.893148538 | 6.893148538 |
| ZNF116     | 6.893148538 | 6.893148538 | 6.893148538 | 6.893148538 | 6.8931       |             |             |             |             |             |             |             |             |             |             |             |             |             |



|          |             |             |             |             |             |             |             |             |             |             |             |             |             |             |             |             |             |             |
|----------|-------------|-------------|-------------|-------------|-------------|-------------|-------------|-------------|-------------|-------------|-------------|-------------|-------------|-------------|-------------|-------------|-------------|-------------|
| ARL8A    | 6.79811627  | 7.17240623  | 6.61606854  | 6.793437855 | 6.967335515 | 7.218136271 | 7.111006712 | 6.810306645 | 6.884992033 | 6.478997974 | 7.142637224 | 7.003114012 | 7.163351344 | 7.040420824 | 6.923955412 | 6.69697803  | 6.63566779  | 6.356386181 |
| CLB      | 7.93096179  | 5.567958123 | 5.399727933 | 5.58001271  | 7.534014166 | 6.978144165 | 6.487998712 | 7.33399732  | 6.686273954 | 6.883490682 | 6.884479562 | 6.783832516 | 5.403516525 | 6.238576287 | 7.171487849 | 6.740780173 | 6.920612452 | 7.482065991 |
| DNAL1    | 5.838061319 | 7.598963578 | 6.061122092 | 6.061122092 | 7.035117518 | 7.203809769 | 5.787830189 | 7.060823482 | 6.932318188 | 6.887890875 | 6.851175588 | 6.189658535 | 5.948312631 | 5.723050582 | 6.618839583 | 7.146896056 | 7.703766261 | 7.16926811  |
| SLC35A2  | 6.805295499 | 5.638613755 | 5.626826097 | 7.776164765 | 6.84320447  | 5.735139419 | 6.818686362 | 7.364319923 | 7.213748859 | 6.7931137   | 7.176524544 | 6.959423336 | 7.641546827 | 5.733123249 | 7.396108058 | 7.096082524 | 7.096082524 | 6.69954849  |
| SLC35A4  | 5.948398979 | 5.243761613 | 5.237175415 | 5.237175415 | 5.237175415 | 5.237175415 | 5.237175415 | 5.237175415 | 5.237175415 | 5.237175415 | 5.237175415 | 5.237175415 | 5.237175415 | 5.237175415 | 5.237175415 | 5.237175415 | 5.237175415 | 5.237175415 |
| B2G1     | 5.566926912 | 6.417151759 | 6.417151759 | 7.473153751 | 7.458894575 | 7.488315734 | 6.959235939 | 6.871184267 | 6.930636766 | 6.963818443 | 7.005454042 | 6.843145998 | 6.671077333 | 6.671077333 | 6.671077333 | 6.671077333 | 6.671077333 | 6.671077333 |
| CPV6A1   | 6.508461628 | 5.796416446 | 5.796416446 | 7.389057383 | 7.131594799 | 5.894301028 | 7.069332383 | 5.826812405 | 6.988046894 | 6.441569853 | 7.185829194 | 6.942621594 | 7.026836579 | 5.902448619 | 6.868813778 | 6.928797769 | 6.701682354 | 7.20563562  |
| MAM1L    | 6.173706123 | 7.246071619 | 6.901488    | 7.246071619 | 7.04234995  | 6.379072608 | 7.098393756 | 6.832960338 | 7.108365366 | 6.855024478 | 7.12923961  | 7.151334748 | 7.694665951 | 5.989088979 | 6.675259409 | 6.957075928 | 6.893210245 | 7.753290139 |
| BBSA     | 6.974438614 | 7.190762046 | 5.763031272 | 6.969301358 | 5.747319627 | 6.850660367 | 6.897145947 | 6.852856474 | 6.749820146 | 6.899769064 | 7.051416621 | 7.365456754 | 6.26868069  | 6.824839864 | 7.006713178 | 6.623959546 | 7.276564528 | 6.842803932 |
| GALNS    | 6.904875938 | 7.033672498 | 7.124946892 | 7.094375738 | 5.826578799 | 6.423075151 | 6.423075151 | 6.423075151 | 6.423075151 | 6.423075151 | 6.423075151 | 6.423075151 | 6.423075151 | 6.423075151 | 6.423075151 | 6.423075151 | 6.423075151 | 6.423075151 |
| LIN9     | 5.892420595 | 5.892420595 | 5.892420595 | 7.032725117 | 6.924269333 | 6.555358614 | 7.082550241 | 7.082550241 | 6.871507769 | 7.135265101 | 6.871507769 | 6.824010726 | 7.066993462 | 6.823719266 | 6.906993462 | 6.823719266 | 6.906993462 | 6.823719266 |
| CPV2U1   | 5.413843414 | 7.397386833 | 7.47956211  | 7.397386833 | 8.369737493 | 7.484613859 | 8.114665258 | 6.629156166 | 6.693507525 | 6.579567201 | 6.489585565 | 5.40431507  | 5.404702469 | 7.633975338 | 6.874045374 | 7.12580639  | 7.015578452 | 6.92027168  |
| IT17J2   | 6.834103208 | 5.440501578 | 7.197555557 | 7.197555557 | 6.901519555 | 5.368680748 | 7.221645826 | 6.893230224 | 7.29735443  | 7.054949203 | 7.039548148 | 5.428595752 | 5.458909352 | 7.176788967 | 6.777193186 | 6.532732601 | 7.97526669  |             |
| MTA1     | 7.075260926 | 7.033190366 | 7.429294512 | 7.39574073  | 7.07882084  | 7.104621028 | 6.944984199 | 6.872133358 | 6.768566112 | 6.776038697 | 6.863986789 | 6.564183045 | 6.767006104 | 6.756885204 | 6.921049858 | 6.762851967 | 6.561190197 | 6.538541936 |
| ZNF219   | 6.985368814 | 6.215050735 | 6.155399525 | 7.236117914 | 6.654058777 | 6.792485976 | 6.791453915 | 6.930404681 | 6.862309541 | 7.437696868 | 7.110172986 | 7.04285832  | 6.784077598 | 6.960607228 | 6.952942968 | 6.970730564 |             |             |
| TST      | 6.905389285 | 7.636900232 | 5.738893505 | 6.526004319 | 6.859368540 | 5.841340889 | 6.883101513 | 6.776485559 | 7.172149475 | 6.906480954 | 7.498874091 | 7.32018731  | 8.211443808 | 6.297913751 | 6.944910438 | 6.627261455 | 6.816340501 | 8.068281138 |
| PUDP     | 6.327425206 | 7.063105802 | 7.063105802 | 7.063105802 | 7.063105802 | 7.063105802 | 7.063105802 | 7.063105802 | 7.063105802 | 7.063105802 | 7.063105802 | 7.063105802 | 7.063105802 | 7.063105802 | 7.063105802 | 7.063105802 | 7.063105802 | 7.063105802 |
| SLC16A3  | 7.078316364 | 6.608299599 | 7.311490119 | 6.715196011 | 7.494489549 | 6.791508058 | 6.972580243 | 6.977137223 | 7.252480243 | 7.68881104  | 6.955270876 | 6.843261725 | 6.633344913 | 6.660848498 | 6.59381011  | 7.112979142 | 6.599000517 | 6.940433155 |
| PKP4     | 6.038726237 | 7.719252277 | 7.33456471  | 7.33456471  | 7.51420292  | 6.579550931 | 7.973057507 | 6.71373902  | 7.190196707 | 7.082799964 | 6.09620374  | 6.227833683 | 5.464237512 | 7.102625135 | 6.527010131 | 7.10644005  | 6.805199127 |             |
| ENDOV    | 6.849598615 | 6.807616057 | 6.384785955 | 7.367808663 | 6.893786604 | 6.718406461 | 6.904945724 | 6.904945724 | 6.904945724 | 6.904945724 | 6.904945724 | 6.904945724 | 6.904945724 | 6.904945724 | 6.904945724 | 6.904945724 | 6.904945724 | 6.904945724 |
| MTX1     | 5.925196815 | 5.405422059 | 5.386680754 | 6.960463728 | 5.415664403 | 6.580750984 | 7.207593421 | 7.022392655 | 6.42114353  | 6.882999978 | 7.088137372 | 6.486228679 | 7.164865064 | 8.297954471 | 7.699118005 | 6.789703059 | 7.037386509 | 6.526568408 |
| TPS3     | 6.884985263 | 6.88429347  | 6.615337233 | 7.333004173 | 6.547376557 | 6.698015822 | 7.095730873 | 6.733172522 | 6.733172522 | 6.733172522 | 6.733172522 | 6.733172522 | 6.733172522 | 6.733172522 | 6.733172522 | 6.733172522 | 6.733172522 | 6.733172522 |
| FLYWCH2  | 7.337246632 | 7.000184515 | 7.396161001 | 6.304828654 | 6.800852999 | 6.638019194 | 6.285012486 | 6.770167335 | 7.215236485 | 7.045477653 | 6.965916712 | 6.656999799 | 7.25467636  | 7.546785288 | 6.785658893 | 8.869272368 | 6.909870919 | 6.775262416 |
| ADAM32   | 6.738815356 | 6.683463686 | 6.816269294 | 7.67028772  | 6.51162208  | 6.354576272 | 6.909793674 | 7.576343514 | 6.657845181 | 6.743315502 | 6.89406167  | 6.642815591 | 6.884114863 | 7.678996426 | 7.483684685 | 6.829825283 | 7.221129554 |             |
| CL40rF80 | 6.774277839 | 6.869477531 | 6.056516594 | 6.862397112 | 6.479391731 | 7.522584834 | 6.907557542 | 7.103296128 | 6.85491703  | 6.85491703  | 6.745024665 | 5.991398475 | 6.720289448 | 7.271326989 | 7.179800231 | 6.906263274 | 6.93392872  | 7.399330233 |
| ATP11A   | 8.588864121 | 5.612493871 | 5.612493871 | 7.666247848 | 5.70662411  | 5.29634793  | 5.618403258 | 7.290656327 | 7.366247888 | 7.920686795 | 6.884879595 | 6.229560169 | 6.866833819 | 6.637712703 | 7.275128685 | 6.662267164 | 7.252020929 | 7.35124441  |
| ZNF212   | 7.531026627 | 8.188386147 | 7.542447049 | 6.856756839 | 6.862101015 | 6.653765588 | 7.094716136 | 7.162025509 | 7.088425949 | 6.912160706 | 6.842820854 | 5.756857398 | 7.45426962  | 6.6403732   | 6.664132704 | 6.74000297  | 7.02835045  | 6.64393935  |
| PAZ1     | 6.934664939 | 7.421337954 | 7.421337954 | 7.421337954 | 7.421337954 | 7.421337954 | 7.421337954 | 7.421337954 | 7.421337954 | 7.421337954 | 7.421337954 | 7.421337954 | 7.421337954 | 7.421337954 | 7.421337954 | 7.421337954 | 7.421337954 | 7.421337954 |
| ED7      | 6.097569968 | 6.097569968 | 6.097569968 | 6.614681449 | 7.2864478   | 6.65347458  | 6.359898966 | 6.96118036  | 6.93073002  | 7.07375482  | 6.745320513 | 7.183735199 | 6.649673149 | 5.72523194  | 7.250951034 | 6.840088349 | 6.608381026 | 6.99446733  |
| HEATR3   | 5.495103817 | 5.377794129 | 6.856184948 | 6.168822482 | 6.266075989 | 8.330260013 | 5.506463926 | 6.395308037 | 7.824312257 | 7.00075672  | 7.289602028 | 7.744750331 | 5.699896468 | 6.91462105  | 6.663231945 | 7.048906808 | 7.243015191 | 6.971943125 |
| TMEM638  | 5.860141396 | 5.903565212 | 6.787460191 | 6.877460191 | 6.443604605 | 6.646031513 | 6.19306915  | 6.963755941 | 7.19306915  | 6.825982259 | 6.836438197 | 6.617513194 | 6.360448454 | 5.64009914  | 7.778214576 | 5.494947041 | 6.916298427 | 6.408812137 |
| SGCB     | 6.994486804 | 5.500308609 | 7.01873331  | 6.807005029 | 7.032584832 | 6.852520225 | 7.008748388 | 6.988122599 | 6.836438197 | 6.617513194 | 6.360448454 | 5.64009914  | 7.778214576 | 5.494947041 | 6.916298427 | 6.408812137 | 6.40125214  | 7.633657785 |
| PAPS52   | 7.743154364 | 7.096849386 | 7.461124881 | 7.237002702 | 6.155420082 | 6.56843024  | 6.56843024  | 6.56843024  | 6.56843024  | 6.56843024  | 6.56843024  | 6.56843024  | 6.56843024  | 6.56843024  | 6.56843024  | 6.56843024  | 6.56843024  | 6.56843024  |
| ZBT49    | 6.126497044 | 7.646435201 | 7.254737032 | 5.98971272  | 7.251677743 | 6.864570467 | 5.74375411  | 6.72872906  | 6.400023711 | 6.565149338 | 7.213737038 | 6.951328368 | 7.87272935  | 6.624513718 | 6.903065415 | 7.423013499 | 6.70009332  | 6.608729716 |
| LHR1     | 6.948096236 | 7.154230393 | 6.986967526 | 6.986967526 | 6.986967526 | 6.986967526 | 6.986967526 | 6.986967526 | 6.986967526 | 6.986967526 | 6.986967526 | 6.986967526 | 6.986967526 | 6.986967526 | 6.986967526 | 6.986967526 | 6.986967526 | 6.986967526 |
| LRH1     | 5.647341355 | 6.358231732 | 7.368011587 | 6.80745516  | 6.80745516  | 6.80745516  | 6.80745516  | 6.80745516  | 6.80745516  | 6.80745516  | 6.80745516  | 6.80745516  | 6.80745516  | 6.80745516  | 6.80745516  | 6.80745516  | 6.80745516  | 6.80745516  |
| GMNN     | 6.689528624 | 5.804712374 | 6.948695479 | 6.793738967 | 6.70470944  | 6.959254195 | 7.488590919 | 7.242787362 | 6.739268911 | 6.652524953 | 6.825004402 | 7.128675885 | 6.844584083 | 7.036200889 | 6.465259817 | 6.914227295 | 7.004917668 | 7.369687717 |
| GCH1     | 6.535792656 | 7.140066622 | 7.140066622 | 6.740646522 | 6.974300766 | 6.716476275 | 6.892926929 | 6.716476275 | 6.892926929 | 6.716476275 | 6.892926929 | 6.716476275 | 6.892926929 | 6.716476275 | 6.892926929 | 6.716476275 | 6.892926929 | 6.716476275 |
| TMEM181  | 5.737664292 | 5.7805346   | 5.677481763 | 6.459348461 | 7.237961672 | 6.622299927 | 6.414851962 | 7.060899147 | 7.042811889 | 6.967063355 | 7.215368701 | 6.070474185 | 7.366600012 | 5.760272    | 7.544145192 | 7.318987526 | 7.985987072 | 7.500544209 |
| KAT1A    | 7.766174235 | 7.325971367 | 6.448308590 | 7.237002702 | 6.155420082 | 6.852520225 | 7.008748388 | 6.988122599 | 6.836438197 | 6.617513194 | 6.360448454 | 5.64009914  | 7.778214576 | 5.494947041 | 6.916298427 | 6.408812137 | 6.40125214  | 7.633657785 |
| NUJ35    | 6.853541428 | 6.68204428  | 6.83541428  | 7.25318847  | 7.061764818 | 7.025118984 | 7.460091134 | 7.007009812 | 6.673138442 | 6.673138442 | 6.673138442 | 6.673138442 | 6.673138442 | 6.673138442 | 6.673138442 | 6.673138442 | 6.673138442 | 6.673138442 |
| SLXHP    | 6.438703064 | 6.987575513 | 6.985657472 | 6.787864018 | 6.053047198 | 7.070963948 | 6.236004245 | 6.840878223 | 6.881848241 | 7.51652     |             |             |             |             |             |             |             |             |

|          |             |              |              |              |              |              |              |              |              |              |              |              |              |              |              |              |              |              |
|----------|-------------|--------------|--------------|--------------|--------------|--------------|--------------|--------------|--------------|--------------|--------------|--------------|--------------|--------------|--------------|--------------|--------------|--------------|
| FANCC    | 6.700430893 | 5.617889038  | 8.072717374  | 5.592772012  | 6.754914037  | 5.826438808  | 7.759639254  | 6.676744144  | 6.522329653  | 7.195345365  | 6.915763666  | 7.082845091  | 7.206661896  | 6.780430329  | 6.729029784  | 6.9494421    | 6.943346532  | 7.206299384  |
| TYWS     | 7.129462811 | 6.905763933  | 6.005522507  | 7.166199731  | 7.335290711  | 7.850537033  | 6.41866402   | 6.418677227  | 6.84564461   | 6.84564461   | 6.84564461   | 6.84564461   | 6.84564461   | 6.84564461   | 6.84564461   | 6.84564461   | 6.84564461   | 6.84564461   |
| SLC15A3  | 7.124138413 | 6.798463863  | 6.798463863  | 6.798463863  | 6.798463863  | 6.798463863  | 6.798463863  | 6.798463863  | 6.798463863  | 6.798463863  | 6.798463863  | 6.798463863  | 6.798463863  | 6.798463863  | 6.798463863  | 6.798463863  | 6.798463863  | 6.798463863  |
| TA15     | 6.122480435 | 5.733605757  | 6.264196859  | 6.414205042  | 6.110619252  | 7.495947039  | 6.029013048  | 7.044162631  | 6.679481989  | 7.225500218  | 7.04682924   | 5.991539486  | 6.032680973  | 5.488542542  | 7.438129761  | 7.167745599  | 7.015940773  | 7.250878939  |
| ALM1A    | 7.518184425 | 6.789246373  | 7.731958029  | 6.789246373  | 6.789246373  | 6.789246373  | 6.789246373  | 6.789246373  | 6.789246373  | 6.789246373  | 6.789246373  | 6.789246373  | 6.789246373  | 6.789246373  | 6.789246373  | 6.789246373  | 6.789246373  | 6.789246373  |
| SBC1     | 6.160823091 | 6.258237937  | 6.258237937  | 6.258237937  | 6.258237937  | 6.258237937  | 6.258237937  | 6.258237937  | 6.258237937  | 6.258237937  | 6.258237937  | 6.258237937  | 6.258237937  | 6.258237937  | 6.258237937  | 6.258237937  | 6.258237937  | 6.258237937  |
| GRPN3    | 5.918553524 | 5.840048309  | 5.939002996  | 6.680044983  | 6.40896      | 5.828128389  | 6.119881281  | 6.829473661  | 7.178539001  | 6.911091934  | 7.104117188  | 6.730343803  | 5.979618282  | 7.857473133  | 6.011803047  | 7.157354781  | 7.474871456  | 7.492527868  |
| R81B1    | 6.89326696  | 6.872079352  | 6.872079352  | 6.872079352  | 6.872079352  | 6.872079352  | 6.872079352  | 6.872079352  | 6.872079352  | 6.872079352  | 6.872079352  | 6.872079352  | 6.872079352  | 6.872079352  | 6.872079352  | 6.872079352  | 6.872079352  | 6.872079352  |
| SBNO2    | 7.115359030 | 7.074320441  | 6.785696459  | 6.663816053  | 6.782388199  | 7.149898313  | 7.003760509  | 6.870266639  | 6.73591472   | 6.780199101  | 6.944973671  | 6.869407916  | 7.516373081  | 5.891481726  | 6.670985767  | 6.982214485  | 6.990002578  | 6.814845189  |
| PMS2     | 7.117459635 | 7.035146877  | 6.7295907426 | 6.7295907426 | 6.7295907426 | 6.7295907426 | 6.7295907426 | 6.7295907426 | 6.7295907426 | 6.7295907426 | 6.7295907426 | 6.7295907426 | 6.7295907426 | 6.7295907426 | 6.7295907426 | 6.7295907426 | 6.7295907426 | 6.7295907426 |
| EO13     | 5.601772612 | 6.7295907426 | 6.7295907426 | 6.7295907426 | 6.7295907426 | 6.7295907426 | 6.7295907426 | 6.7295907426 | 6.7295907426 | 6.7295907426 | 6.7295907426 | 6.7295907426 | 6.7295907426 | 6.7295907426 | 6.7295907426 | 6.7295907426 | 6.7295907426 | 6.7295907426 |
| TRAF3IP2 | 7.153558688 | 7.053267108  | 6.7295907426 | 6.7295907426 | 6.7295907426 | 6.7295907426 | 6.7295907426 | 6.7295907426 | 6.7295907426 | 6.7295907426 | 6.7295907426 | 6.7295907426 | 6.7295907426 | 6.7295907426 | 6.7295907426 | 6.7295907426 | 6.7295907426 | 6.7295907426 |
| CAPN3    | 6.99679831  | 7.205267108  | 6.7295907426 | 6.7295907426 | 6.7295907426 | 6.7295907426 | 6.7295907426 | 6.7295907426 | 6.7295907426 | 6.7295907426 | 6.7295907426 | 6.7295907426 | 6.7295907426 | 6.7295907426 | 6.7295907426 | 6.7295907426 | 6.7295907426 | 6.7295907426 |
| DARS2    | 5.338390964 | 6.987240056  | 7.016169008  | 5.733488366  | 7.354007454  | 8.064141367  | 5.468229998  | 6.65731074   | 7.025895962  | 6.394367465  | 6.869609094  | 7.216414466  | 5.33556971   | 5.347312149  | 6.92088519   | 6.910233157  | 6.612804585  | 6.805745212  |
| SH2B1    | 6.866596284 | 6.987240056  | 7.016169008  | 5.733488366  | 7.354007454  | 8.064141367  | 5.468229998  | 6.65731074   | 7.025895962  | 6.394367465  | 6.869609094  | 7.216414466  | 5.33556971   | 5.347312149  | 6.92088519   | 6.910233157  | 6.612804585  | 6.805745212  |
| SAMD12   | 5.621297826 | 6.666614495  | 5.577511998  | 6.224077301  | 7.200457462  | 6.908330006  | 6.746096334  | 6.995263337  | 7.153114054  | 6.752882222  | 7.142882931  | 6.568384196  | 7.352871529  | 6.998852489  | 6.696231481  | 7.00864957   | 6.756463892  | 7.389520051  |
| USP31    | 5.80447863  | 5.572799136  | 6.666614495  | 5.577511998  | 6.224077301  | 7.200457462  | 6.908330006  | 6.746096334  | 6.995263337  | 7.153114054  | 6.752882222  | 7.142882931  | 6.568384196  | 7.352871529  | 6.998852489  | 6.696231481  | 7.00864957   | 6.756463892  |
| ZSCAN2   | 6.864165608 | 6.240665161  | 6.538952475  | 6.58756826   | 6.981038662  | 6.970574905  | 6.850402929  | 6.679261078  | 6.813659746  | 7.022897518  | 7.488107674  | 6.857903708  | 6.334925234  | 6.650781837  | 6.740525743  | 7.300761556  | 7.21185366   | 6.746326663  |
| ZNF49    | 6.382052363 | 7.348437778  | 7.218811963  | 6.736356422  | 7.163957622  | 6.876356422  | 7.1391390783 | 6.260120471  | 7.179214554  | 6.668452532  | 6.24757565   | 7.250797468  | 6.739398279  | 7.257037945  | 5.986712314  | 6.668081364  | 6.668081364  | 6.668081364  |
| TDM117   | 5.915822875 | 5.914820819  | 6.814183395  | 6.814183395  | 6.814183395  | 6.814183395  | 6.814183395  | 6.814183395  | 6.814183395  | 6.814183395  | 6.814183395  | 6.814183395  | 6.814183395  | 6.814183395  | 6.814183395  | 6.814183395  | 6.814183395  | 6.814183395  |
| STR2     | 5.748383838 | 5.484262032  | 5.785266202  | 7.411489434  | 5.753292927  | 7.153676727  | 7.070252821  | 6.886166759  | 6.552105262  | 6.534854059  | 6.767271881  | 7.307693054  | 5.691097883  | 5.446739652  | 6.847311154  | 7.130596022  | 7.017519515  | 6.9789724    |
| ZNF583   | 7.202227072 | 7.326831163  | 7.326831163  | 7.326831163  | 7.326831163  | 7.326831163  | 7.326831163  | 7.326831163  | 7.326831163  | 7.326831163  | 7.326831163  | 7.326831163  | 7.326831163  | 7.326831163  | 7.326831163  | 7.326831163  | 7.326831163  | 7.326831163  |
| GSTC0    | 7.469402681 | 5.838817974  | 6.580836711  | 5.80439595   | 6.803411347  | 7.021386397  | 6.211805711  | 7.027314525  | 7.091544045  | 6.996160137  | 6.854004003  | 5.899745653  | 5.878936209  | 8.123626601  | 6.930557074  | 7.049814005  | 5.61834      | 7.288233656  |
| RPTOR    | 6.889875625 | 5.971279096  | 6.746200825  | 6.456814957  | 6.927460028  | 6.296689753  | 6.578328618  | 6.902367488  | 6.95157009   | 6.969460138  | 7.319058293  | 7.185685792  | 6.713539616  | 6.745513792  | 7.063336591  | 6.798458122  | 6.798458122  | 6.798458122  |
| ARGAP35  | 5.798458122 | 6.428813087  | 7.222272234  | 7.139065403  | 6.997599189  | 6.705709418  | 7.144238975  | 7.052887781  | 7.072972912  | 5.821403875  | 6.848437107  | 6.796561606  | 6.8049829    | 8.832427393  | 6.601544802  | 7.85678369   | 7.85678369   | 7.85678369   |
| URB1     | 5.396851264 | 8.012018889  | 5.993201647  | 5.82502321   | 6.098802488  | 7.244347038  | 7.434214503  | 6.859979288  | 7.131661339  | 7.112924759  | 6.855929886  | 6.966579808  | 6.966170884  | 7.96555112   | 6.798052104  | 6.57120863   | 6.64895506   | 6.783620855  |
| PTPRG    | 5.747266703 | 5.720851634  | 7.312277672  | 7.165188802  | 5.349303358  | 5.36639652   | 7.280118325  | 7.100820676  | 6.668916884  | 5.358977421  | 6.235840462  | 6.528866582  | 6.986224781  | 6.631539551  | 7.130479737  | 7.214919420  | 7.214919420  | 7.214919420  |
| WDR3     | 6.864407136 | 6.864407136  | 6.864407136  | 6.864407136  | 6.864407136  | 6.864407136  | 6.864407136  | 6.864407136  | 6.864407136  | 6.864407136  | 6.864407136  | 6.864407136  | 6.864407136  | 6.864407136  | 6.864407136  | 6.864407136  | 6.864407136  | 6.864407136  |
| NEK3     | 6.864407136 | 6.864407136  | 6.864407136  | 6.864407136  | 6.864407136  | 6.864407136  | 6.864407136  | 6.864407136  | 6.864407136  | 6.864407136  | 6.864407136  | 6.864407136  | 6.864407136  | 6.864407136  | 6.864407136  | 6.864407136  | 6.864407136  | 6.864407136  |
| ABI3BP   | 5.901475603 | 7.249148633  | 7.062750326  | 6.101291265  | 6.899566515  | 5.540788226  | 6.059188662  | 6.748553368  | 6.989973436  | 6.824803987  | 6.384912351  | 6.514858726  | 7.493633538  | 5.742738769  | 7.132747282  | 6.963406008  | 6.822985695  | 6.918642391  |
| TL1E1    | 5.490146505 | 5.462541658  | 6.039638175  | 6.373594995  | 7.15215962   | 7.536701619  | 6.98666477   | 7.426016135  | 6.98666477   | 7.426016135  | 6.98666477   | 7.426016135  | 6.98666477   | 7.426016135  | 6.98666477   | 7.426016135  | 6.98666477   | 7.426016135  |
| EXO6     | 5.897425333 | 7.38384619   | 7.013708362  | 5.912125465  | 6.796908596  | 7.228459912  | 6.224169785  | 7.228459912  | 6.480434374  | 6.761393151  | 6.708813165  | 5.89174114   | 7.098272791  | 6.253375531  | 6.882881922  | 5.96016025   | 7.117467504  | 7.341805554  |
| SCRIB    | 6.736856314 | 6.564911702  | 7.19288757   | 7.19288757   | 7.19288757   | 7.19288757   | 7.19288757   | 7.19288757   | 7.19288757   | 7.19288757   | 7.19288757   | 7.19288757   | 7.19288757   | 7.19288757   | 7.19288757   | 7.19288757   | 7.19288757   | 7.19288757   |
| Clorf9   | 6.671849283 | 7.12088757   | 7.19288757   | 7.19288757   | 7.19288757   | 7.19288757   | 7.19288757   | 7.19288757   | 7.19288757   | 7.19288757   | 7.19288757   | 7.19288757   | 7.19288757   | 7.19288757   | 7.19288757   | 7.19288757   | 7.19288757   | 7.19288757   |
| AICR50   | 7.473874888 | 7.146671034  | 7.50591676   | 6.50763949   | 6.979052096  | 6.979052096  | 6.979052096  | 6.979052096  | 6.979052096  | 6.979052096  | 6.979052096  | 6.979052096  | 6.979052096  | 6.979052096  | 6.979052096  | 6.979052096  | 6.979052096  | 6.979052096  |
| CEP100   | 6.005600219 | 6.005600219  | 6.005600219  | 6.005600219  | 6.005600219  | 6.005600219  | 6.005600219  | 6.005600219  | 6.005600219  | 6.005600219  | 6.005600219  | 6.005600219  | 6.005600219  | 6.005600219  | 6.005600219  | 6.005600219  | 6.005600219  | 6.005600219  |
| EMZ      | 6.072087913 | 7.125725685  | 6.238066815  | 6.066654812  | 6.119734947  | 6.753067276  | 7.411395999  | 6.878245826  | 6.233799065  | 6.864757147  | 6.843003905  | 6.796962113  | 5.912645075  | 7.134045065  | 6.985424074  | 6.507894933  | 6.876547661  | 6.601068488  |
| ANKK1F   | 6.156402006 | 7.567308386  | 6.58357891   | 6.58357891   | 6.58357891   | 6.58357891   | 6.58357891   | 6.58357891   | 6.58357891   | 6.58357891   | 6.58357891   | 6.58357891   | 6.58357891   | 6.58357891   | 6.58357891   | 6.58357891   | 6.58357891   | 6.58357891   |
| RNF19B   | 5.707628638 | 7.892455135  | 5.361630748  | 6.451602446  | 5.356244923  | 7.581484848  | 6.232208424  | 7.478687169  | 7.997504790  | 6.547466751  | 7.666893729  | 7.090088485  | 6.5307867    | 5.682365894  | 7.691040792  | 7.307355289  | 6.255767196  | 7.891130135  |
| LPGAT1   | 7.095213114 | 6.463069933  | 6.463069933  | 6.463069933  | 6.463069933  | 6.463069933  | 6.463069933  | 6.463069933  | 6.463069933  | 6.463069933  | 6.463069933  | 6.463069933  | 6.463069933  | 6.463069933  | 6.463069933  | 6.463069933  | 6.463069933  | 6.463069933  |
| GD5MB    | 5.990016832 | 7.193823194  | 6.432905045  | 6.432905045  | 6.432905045  | 6.432905045  | 6.432905045  | 6.432905045  | 6.432905045  | 6.432905045  | 6.432905045  | 6.432905045  | 6.432905045  | 6.432905045  | 6.432905045  | 6.432905045  | 6.432905045  | 6.432905045  |
| DG5G     | 5.663395623 | 7.051803965  | 7.351661054  | 5.460116617  | 7.062732867  | 6            |              |              |              |              |              |              |              |              |              |              |              |              |

|            |             |             |              |             |             |             |              |              |              |              |             |             |             |             |             |             |             |             |
|------------|-------------|-------------|--------------|-------------|-------------|-------------|--------------|--------------|--------------|--------------|-------------|-------------|-------------|-------------|-------------|-------------|-------------|-------------|
| DYRK1B     | 5.810795762 | 6.932828992 | 5.942346317  | 6.975277854 | 5.92838775  | 6.890091124 | 6.330927789  | 6.828406874  | 6.206788617  | 6.324286203  | 6.797212007 | 7.097631322 | 7.348497724 | 6.898169375 | 6.586919822 | 6.789038842 | 6.796545136 | 6.176048907 |
| ZNF280B    | 7.241660854 | 6.26155867  | 6.463423244  | 6.08517858  | 7.215242324 | 7.07137358  | 6.44704872   | 6.686690399  | 6.937051466  | 6.810666311  | 6.871155294 | 6.400938932 | 7.457569202 | 6.368639643 | 6.963427407 | 6.774673203 | 6.452573231 | 6.452573231 |
| ZNF33      | 6.927747269 | 6.425648564 | 5.916236852  | 5.97451274  | 6.280854429 | 6.212175432 | 7.54315284   | 7.208584853  | 6.879668875  | 7.089917568  | 6.876812151 | 6.05576539  | 7.925477305 | 7.058824188 | 7.546547836 | 6.707458878 | 7.124728499 | 7.103677494 |
| ME1        | 6.69352568  | 6.407711928 | 5.48616316   | 5.475104751 | 7.080232588 | 5.494476112 | 6.919399117  | 7.026535149  | 6.743766641  | 6.113472454  | 7.082971932 | 6.461157238 | 7.05961398  | 7.033909178 | 6.946028532 | 6.839598021 | 6.366777494 | 7.134660657 |
| DMP1       | 5.521965179 | 6.17223512  | 6.182491193  | 6.182491193 | 6.969020571 | 6.703402362 | 6.704787946  | 6.321921635  | 6.324973098  | 6.324973098  | 6.478618087 | 6.50453117  | 7.59877255  | 7.328502042 | 6.312129604 | 6.616592742 | 6.150435443 | 6.150435443 |
| CDC66      | 6.790328194 | 7.466745014 | 6.40585889   | 6.690430666 | 6.183555119 | 6.183555119 | 7.211442073  | 6.470293505  | 6.074852121  | 6.074852121  | 6.895316983 | 6.786717717 | 6.527188211 | 6.616961775 | 6.749680555 | 6.448318995 | 6.80149214  | 7.110057746 |
| CACNA1C    | 6.322557893 | 7.131276448 | 7.131276448  | 7.131276448 | 6.71219087  | 5.393550506 | 5.408732854  | 7.143214088  | 6.805656394  | 6.952578525  | 6.71219087  | 7.201994535 | 5.402673926 | 7.150353754 | 7.281651356 | 6.70207910  | 6.889773715 | 5.90694891  |
| FAM74B-1TB | 7.693533434 | 6.962661137 | 6.157873101  | 6.962661137 | 6.678053642 | 6.59202637  | 6.951272634  | 6.791918021  | 6.636857701  | 7.121918761  | 6.469313344 | 6.211537213 | 7.29182375  | 7.106720431 | 6.550942696 | 6.999163469 | 6.549856117 | 6.549856117 |
| METRLN     | 7.121669305 | 6.823731479 | 6.914273874  | 7.068533764 | 5.894864265 | 6.038214893 | 6.65721523   | 6.989225859  | 6.793576247  | 6.522307454  | 7.559771191 | 6.781674318 | 6.422028216 | 6.128036021 | 6.781441244 | 6.794341705 | 6.457661336 | 7.137455561 |
| MRT04      | 6.978077123 | 7.996071219 | 6.260529074  | 6.524208484 | 6.524208484 | 6.91609555  | 6.841376531  | 6.219436427  | 6.635025113  | 6.626955739  | 6.168602611 | 6.209355774 | 7.368477043 | 6.668721933 | 5.722293661 | 7.153481731 | 6.792840198 | 6.985009777 |
| RP11-249H8 | 7.144540713 | 6.814437155 | 7.103664456  | 6.492955281 | 6.97029948  | 6.839626508 | 6.59906775   | 6.625287584  | 6.759028947  | 6.818296615  | 6.679818087 | 6.50453117  | 7.282150361 | 7.649692764 | 6.645861259 | 6.613023683 | 6.466636667 | 6.466636667 |
| CHP1       | 7.151544125 | 6.338217915 | 6.59351412   | 6.59351412  | 6.21092825  | 7.201894981 | 6.625291346  | 6.625291346  | 6.625291346  | 6.625291346  | 6.797959274 | 6.8392177   | 6.86358225  | 6.77473692  | 6.712931168 | 6.845824685 | 7.00870448  | 6.599521662 |
| AP4E1      | 6.552817615 | 7.321817615 | 5.931801282  | 6.836108672 | 6.90399671  | 7.354529442 | 7.118834366  | 6.54325289   | 7.336091989  | 6.706145363  | 6.321369643 | 6.25237137  | 7.49458107  | 6.62645064  | 6.734088596 | 6.837920217 | 7.000572229 | 6.838116854 |
| RBL1       | 7.69321406  | 5.592526055 | 5.592526055  | 5.592526055 | 6.969336889 | 6.652104745 | 6.631854603  | 6.65232899   | 7.035211955  | 6.705493289  | 7.481444212 | 6.175984404 | 5.86205697  | 5.163650482 | 6.909421688 | 6.65987204  | 7.134698911 | 7.325100835 |
| GBP1       | 5.241340046 | 5.62129057  | 5.22753715   | 7.074237155 | 7.11511346  | 5.978523274 | 6.908871005  | 7.394203894  | 6.720602329  | 6.65872878   | 6.8777158   | 6.84848211  | 6.107286151 | 7.253599836 | 7.86680590  | 6.515103776 | 6.403687152 | 9.80268642  |
| ZNF58      | 5.52564541  | 7.377996622 | 7.0754698147 | 5.453708379 | 6.026144994 | 6.655786834 | 7.018552036  | 7.018552036  | 7.018552036  | 7.018552036  | 7.103280372 | 5.809662029 | 6.910859959 | 5.129195468 | 6.528427867 | 6.042290691 | 6.188322899 | 7.146871474 |
| TMEM182    | 6.82039492  | 7.398532477 | 6.718383361  | 5.805125058 | 5.831574884 | 6.26840262  | 6.620768175  | 6.893307255  | 6.922711894  | 6.717790326  | 6.421755645 | 6.152906392 | 6.075923548 | 6.879424062 | 6.991430929 | 6.806422689 | 6.879541561 | 6.879541561 |
| TS2D       | 6.653401349 | 6.728580366 | 6.032785444  | 5.764724035 | 5.890043557 | 6.856334823 | 5.864013871  | 6.984733298  | 7.116834188  | 7.116834188  | 6.717959207 | 6.696023853 | 7.05040265  | 6.132779791 | 6.723897717 | 6.837620958 | 7.104873999 | 7.104873999 |
| CDC157     | 6.783376089 | 5.837742252 | 6.925421102  | 7.776724573 | 5.911023671 | 6.93811829  | 6.994857457  | 6.90406666   | 6.528331434  | 6.528331434  | 6.90406666  | 6.83905768  | 6.015046616 | 6.71267668  | 7.002740109 | 6.549474912 | 6.7795186   | 6.968676794 |
| ACO7325.4  | 7.16523406  | 6.230833018 | 7.404122481  | 7.409193889 | 7.146496459 | 6.864868465 | 6.279194895  | 6.279194895  | 6.279194895  | 6.279194895  | 6.700545992 | 6.68864592  | 6.677747878 | 7.304537986 | 7.493156971 | 7.286103605 | 6.411799508 | 6.849383513 |
| SMIN8      | 7.450630029 | 7.389086111 | 6.65780857   | 6.64457478  | 6.694865612 | 6.604032819 | 6.236389796  | 6.604000065  | 6.757886226  | 6.942543844  | 7.167771274 | 6.291127902 | 7.13479462  | 7.368820357 | 6.743555498 | 6.657406198 | 8.823548067 | 6.920582895 |
| OBSL1      | 7.11168956  | 7.028477121 | 6.834123294  | 7.198609109 | 6.25637494  | 6.064707136 | 6.859426321  | 6.506664384  | 6.704552549  | 6.947977965  | 6.626167572 | 7.02020047  | 4.876878384 | 7.140236675 | 6.726462767 | 6.687219272 | 6.532931705 | 6.667537846 |
| DNAJA4     | 7.323811385 | 5.635724319 | 5.635724319  | 5.635724319 | 7.079918495 | 6.902525919 | 7.724219732  | 6.970673517  | 6.970673517  | 6.970673517  | 6.601826004 | 5.430885651 | 6.410015546 | 6.744921603 | 7.801145607 | 6.810478107 | 6.63921048  | 6.63921048  |
| OGG1       | 6.468847036 | 7.484833886 | 6.681542492  | 6.569176261 | 7.004337571 | 6.853692753 | 6.62557035   | 7.013533572  | 7.043367504  | 6.909972184  | 6.734537527 | 5.649717821 | 5.563831397 | 7.236615375 | 6.850673043 | 6.33716392  | 6.776827258 | 6.776827258 |
| PGM2       | 5.561974954 | 5.564254694 | 7.499883692  | 7.135584744 | 6.518407414 | 6.317956808 | 6.4654739508 | 6.4654739508 | 6.4654739508 | 6.4654739508 | 6.810673112 | 6.56655739  | 6.358039092 | 7.395221391 | 6.514171465 | 7.288526585 | 6.707076236 | 7.29999736  |
| TLDC1      | 5.831347436 | 6.348608178 | 6.025984853  | 6.988589237 | 6.392055252 | 7.598938827 | 7.009838297  | 7.055679123  | 7.249264137  | 6.466018936  | 7.249591661 | 6.09649521  | 6.2996754   | 6.740858607 | 6.784428315 | 7.433057199 | 6.888382604 | 6.767004953 |
| CARD2      | 6.73532377  | 6.182013315 | 7.170239435  | 6.392314981 | 6.694663261 | 6.59839639  | 5.987382127  | 6.977845526  | 6.532943809  | 6.532943809  | 6.874873209 | 6.874873209 | 7.214655912 | 7.048558916 | 6.730200016 | 7.145637073 | 6.330000016 | 6.330000016 |
| HIRA       | 6.23046646  | 6.51045981  | 6.61068267   | 6.61068267  | 6.61068267  | 6.830194416 | 6.963303337  | 6.47767465   | 6.67715832   | 6.67715832   | 6.76607597  | 7.150541132 | 6.068003788 | 7.29086607  | 6.81577587  | 6.833894008 | 6.857749791 | 6.857749791 |
| THUMP2D    | 7.014901326 | 6.105570115 | 7.796939176  | 5.44968097  | 6.550057843 | 6.733418422 | 7.506198967  | 6.995880379  | 7.09459599   | 6.68067612   | 6.659541368 | 6.942019672 | 5.496915914 | 8.379819293 | 7.144532623 | 6.800800455 | 6.677464493 | 6.539212784 |
| GABR1      | 6.778761521 | 6.722757523 | 6.722757523  | 6.722757523 | 5.46326092  | 6.27657474  | 6.865566695  | 6.5374174    | 6.5374174    | 6.5374174    | 6.58372408  | 7.390618435 | 7.532830042 | 6.47105932  | 7.158544888 | 6.948147951 | 6.76251151  | 6.76251151  |
| WDFY2      | 7.937340326 | 7.525964666 | 5.533706444  | 6.529945679 | 6.59865257  | 7.473141995 | 6.39055889   | 7.895414409  | 7.40663341   | 7.48105188   | 6.345261233 | 7.0812499   | 8.184536101 | 5.579125282 | 7.75189208  | 7.253184219 | 7.483661796 | 6.799856863 |
| ZNF609     | 6.102638827 | 7.22550929  | 7.454288319  | 6.559732962 | 6.170793825 | 7.0144516   | 6.747482439  | 6.810159351  | 6.982620494  | 6.336243087  | 6.649842965 | 6.568288018 | 6.87025322  | 6.361120938 | 7.18384896  | 6.998506961 | 6.998506961 | 6.998506961 |
| ST14       | 5.028877057 | 7.864651531 | 7.899272276  | 7.918891437 | 7.812214413 | 6.687758935 | 6.378659041  | 6.708230727  | 7.827470206  | 6.823436707  | 7.827470206 | 6.823436707 | 6.823436707 | 6.823436707 | 6.823436707 | 6.823436707 | 6.823436707 | 6.823436707 |
| SRFBP1     | 5.940712252 | 7.042908174 | 7.042908174  | 7.042908174 | 7.042908174 | 6.850227981 | 6.850227981  | 6.850227981  | 6.850227981  | 6.850227981  | 6.850227981 | 6.850227981 | 6.850227981 | 6.850227981 | 6.850227981 | 6.850227981 | 6.850227981 | 6.850227981 |
| GAB3       | 6.032100501 | 6.699734526 | 6.750367276  | 7.242158825 | 6.92824854  | 6.46919548  | 6.050294987  | 7.091122292  | 6.713118905  | 7.006572705  | 6.782416836 | 9.85671285  | 7.162792868 | 6.134192206 | 7.41207298  | 7.280648081 | 7.336004682 | 6.740622859 |
| MGRBP      | 6.991040057 | 6.249067084 | 6.196662305  | 7.597673575 | 7.161644211 | 7.072488808 | 6.754850713  | 6.810810032  | 6.810810032  | 6.810810032  | 6.586359654 | 5.82615681  | 6.486240942 | 5.599316224 | 6.71479112  | 6.833956989 | 6.800439199 | 6.751055543 |
| SFA2       | 6.425949004 | 6.948924414 | 6.684014537  | 6.60489584  | 6.479859604 | 6.86283089  | 7.127513238  | 7.65483635   | 6.527320822  | 6.519734079  | 6.734329294 | 7.000249223 | 7.211662163 | 7.020521646 | 6.81562929  | 6.850638871 | 6.65438345  | 6.7677794   |
| SNX18      | 7.476803662 | 7.556609241 | 6.647859921  | 6.474359292 | 7.354983124 | 6.072139312 | 6.690866054  | 6.310991172  | 6.1092798    | 6.620745302  | 6.973184434 | 6.617041732 | 6.349990399 | 6.838660509 | 6.617041732 | 6.349990399 | 6.838660509 | 7.041862791 |
| TBC1D8B    | 6.600589522 | 6.549135246 | 6.365832759  | 6.735920001 | 6.434814974 | 6.319105111 | 6.486490514  | 7.03451319   | 6.887116031  | 7.364466371  | 6.880531366 | 6.328692735 | 7.676804894 | 6.760396837 | 7.183618986 | 6.899814644 | 7.520893304 | 7.326905605 |
| CABSR1     | 7.038308923 | 7.160004647 | 5.86010569   | 6.178506973 | 7.026424293 | 6.73853882  | 6.549820146  | 6.755041525  | 6.760730886  | 6.760730886  | 6.760730886 | 6.760730886 | 6.760730886 | 6.760730886 | 6.760730886 | 6.760730886 | 6.760730886 | 6.760730886 |
| CHD2       | 6.73532377  | 6.182013315 | 7.170239435  | 6.392314981 | 6.694663261 | 6.59839639  | 5.987382127  | 6.977845526  | 6.532943809  | 6.532943809  | 6.874873209 | 6.874873209 | 7.214655912 | 7.048558916 | 6.730200016 | 7.145637073 | 6.330000016 | 6.330000016 |
| ZNF73      | 7.258226748 | 5.698391257 | 6.92800389   | 6.498874353 | 7.04206164  | 6.11108693  | 6.286415807  | 6.554274576  | 6.585932267  | 7.028144908  | 6           |             |             |             |             |             |             |             |

|             |             |             |             |             |             |             |             |             |             |             |             |             |             |             |             |             |             |             |
|-------------|-------------|-------------|-------------|-------------|-------------|-------------|-------------|-------------|-------------|-------------|-------------|-------------|-------------|-------------|-------------|-------------|-------------|-------------|
| PIPP2       | 7.662593644 | 6.843682716 | 6.59136809  | 5.41117923  | 6.55053722  | 7.495212058 | 5.428299114 | 5.778310423 | 6.719427961 | 6.348761776 | 6.361424281 | 6.036352946 | 7.332071797 | 8.011288863 | 7.407738473 | 6.767193913 | 6.743280355 | 7.91168125  |
| 6.907597515 | 7.630795975 | 7.374451617 | 7.834613942 | 7.045943219 | 7.1826377   | 6.865024803 | 6.27821262  | 6.99002384  | 6.788341402 | 6.920996618 | 6.556926045 | 6.674823262 | 6.749623956 | 6.576659903 | 6.454961796 | 6.562348416 | 6.58027822  | 6.556963558 |
| GD27        | 6.967962167 | 6.334456161 | 6.179192025 | 6.439485427 | 6.358442879 | 6.695959515 | 6.608352778 | 7.093315862 | 6.763343156 | 7.2141238   | 6.515059005 | 6.457548509 | 6.260431881 | 7.15039959  | 7.110729932 | 6.487761491 | 7.107203728 |             |
| EPOR        | 6.871091934 | 5.951519752 | 7.673024265 | 7.589546099 | 6.837168831 | 6.714914939 | 6.670117326 | 6.631277954 | 6.503810592 | 6.713190639 | 6.614947205 | 6.697305283 | 6.746788019 | 7.586439743 | 7.586439743 | 6.744056383 | 6.906371355 | 6.602634111 |
| DCR6        | 6.965115449 | 6.485119496 | 6.670925508 | 6.751259226 | 6.751259226 | 6.751259226 | 6.751259226 | 6.751259226 | 6.751259226 | 6.751259226 | 6.751259226 | 6.751259226 | 6.751259226 | 6.751259226 | 6.751259226 | 6.751259226 | 6.751259226 | 6.751259226 |
| UBOK5       | 7.549792347 | 6.715246216 | 6.715246216 | 6.715246216 | 6.715246216 | 6.715246216 | 6.715246216 | 6.715246216 | 6.715246216 | 6.715246216 | 6.715246216 | 6.715246216 | 6.715246216 | 6.715246216 | 6.715246216 | 6.715246216 | 6.715246216 | 6.715246216 |
| RADS1B      | 6.272200922 | 6.674474015 | 6.506600253 | 5.587196741 | 6.914075414 | 6.719865222 | 7.141985382 | 6.276152065 | 6.640012536 | 6.67640315  | 6.709806060 | 6.738093966 | 6.840099911 | 7.038568757 | 6.477283267 | 6.898786541 | 7.000321520 | 6.683026206 |
| MSK1        | 7.225092368 | 6.712203974 | 6.712203974 | 6.712203974 | 6.712203974 | 6.712203974 | 6.712203974 | 6.712203974 | 6.712203974 | 6.712203974 | 6.712203974 | 6.712203974 | 6.712203974 | 6.712203974 | 6.712203974 | 6.712203974 | 6.712203974 | 6.712203974 |
| EFCAB7      | 5.498787671 | 7.562726493 | 6.852771925 | 7.201160478 | 6.386684918 | 7.062704077 | 6.051329585 | 6.299784271 | 6.593714259 | 6.620566697 | 7.049349576 | 6.408252529 | 7.57951416  | 7.143734143 | 6.67184388  | 6.740878357 | 7.095761067 | 6.713923460 |
| SLC8A1      | 7.595836754 | 7.818312618 | 6.738495293 | 6.850580652 | 5.408400912 | 6.759502433 | 5.820895923 | 7.123357111 | 6.480597523 | 7.118316511 | 6.605236867 | 7.049349576 | 6.408252529 | 7.57951416  | 7.143734143 | 6.67184388  | 6.740878357 | 7.095761067 |
| SMUFR1      | 5.644166844 | 5.413322383 | 6.738495293 | 6.850580652 | 5.408400912 | 6.759502433 | 5.820895923 | 7.123357111 | 6.480597523 | 7.118316511 | 6.605236867 | 7.049349576 | 6.408252529 | 7.57951416  | 7.143734143 | 6.67184388  | 6.740878357 | 7.095761067 |
| ZNF708      | 6.723495947 | 7.162925947 | 6.160465687 | 6.759502433 | 5.408400912 | 6.759502433 | 5.820895923 | 7.123357111 | 6.480597523 | 7.118316511 | 6.605236867 | 7.049349576 | 6.408252529 | 7.57951416  | 7.143734143 | 6.67184388  | 6.740878357 | 7.095761067 |
| HEXW2       | 7.171659503 | 5.629321417 | 6.923265137 | 6.368511734 | 6.541284784 | 6.72158276  | 6.827237071 | 6.753787493 | 6.68610441  | 6.99696392  | 6.52322531  | 6.731968095 | 6.731968095 | 6.53938547  | 6.68024518  | 6.649057068 |             |             |
| POLA2       | 6.496398402 | 6.580937643 | 6.966538969 | 5.68524071  | 6.136106322 | 6.21208366  | 6.80651136  | 6.890216342 | 7.071104791 | 6.748947013 | 6.393575477 | 7.214380021 | 5.75931401  | 5.576116272 | 6.757443386 | 6.697839508 | 6.912714925 | 6.18025288  |
| EFCAB2      | 6.52914792  | 6.03200983  | 6.2256791   | 6.78601151  | 6.748356487 | 6.943347375 | 6.83156653  | 6.873522766 | 6.83156653  | 6.873522766 | 6.873522766 | 6.873522766 | 6.873522766 | 6.873522766 | 6.873522766 | 6.873522766 | 6.873522766 | 6.873522766 |
| AMACR       | 5.800403575 | 7.132091395 | 7.971297703 | 6.627809758 | 7.134345815 | 5.895009084 | 6.664227383 | 6.780531153 | 6.942846256 | 6.391807254 | 7.004829922 | 6.310895995 | 5.487432102 | 7.292414444 | 7.054264447 | 6.711239856 | 6.186018394 | 7.101925884 |
| NFATC1      | 7.202352939 | 6.829898059 | 6.921264368 | 6.921264368 | 6.921264368 | 6.921264368 | 6.921264368 | 6.921264368 | 6.921264368 | 6.921264368 | 6.921264368 | 6.921264368 | 6.921264368 | 6.921264368 | 6.921264368 | 6.921264368 | 6.921264368 | 6.921264368 |
| TRMT61A     | 6.686043616 | 7.78525816  | 6.678058546 | 7.091449096 | 6.72981077  | 6.610911972 | 6.57416122  | 6.629790548 | 6.815738716 | 6.652359796 | 6.66419246  | 6.816819912 | 7.381859055 | 7.371752235 | 6.804677827 | 6.713240454 | 6.679165988 | 6.934052503 |
| ZNF776      | 7.002038917 | 6.791913964 | 6.408384299 | 6.493037553 | 6.727756895 | 6.500390076 | 6.175488101 | 6.927049208 | 6.726686396 | 6.954295296 | 6.915192195 | 5.984234775 | 6.798779478 | 6.650712303 | 6.555419348 | 6.454902467 | 6.579525513 | 6.700146737 |
| ZNF407      | 6.973892462 | 7.477887125 | 5.993000256 | 5.671586333 | 5.85415444  | 5.671586333 | 5.85415444  | 6.798138282 | 7.034195466 | 6.804637555 | 6.786626238 | 6.43698377  | 6.757709854 | 6.42647467  | 6.958499601 | 6.691190743 | 6.749065054 | 6.52081893  |
| CEP19       | 7.157398062 | 6.735946173 | 7.003789346 | 6.115396108 | 6.015548123 | 6.54787204  | 6.930800205 | 6.93192868  | 6.93192868  | 6.93192868  | 6.93192868  | 6.93192868  | 6.93192868  | 6.93192868  | 6.93192868  | 6.93192868  | 6.93192868  | 6.93192868  |
| 6.685095658 | 7.000095254 | 6.629519108 | 6.200897138 | 6.027316123 | 7.356474847 | 6.52898444  | 6.550082282 | 6.130233093 | 6.41486326  | 7.242334514 | 6.531775404 | 7.480552403 | 6.755268661 | 6.771594555 | 7.144522076 | 6.595438821 |             |             |
| MTHFD1L     | 6.469195468 | 7.322036545 | 7.380792772 | 6.626356653 | 7.125181918 | 6.626356653 | 7.125181918 | 6.877223148 | 6.659965314 | 6.89049684  | 6.622311598 | 6.882242905 | 6.705913768 | 5.73106943  | 6.60166352  | 6.921781871 | 7.101057281 | 6.638248589 |
| FYN         | 6.712052858 | 6.689873893 | 6.795188169 | 6.710765642 | 6.471206576 | 5.730910554 | 6.60038671  | 6.956773118 | 5.379396047 | 6.352466154 | 5.392717141 | 6.841187754 | 6.726530845 | 5.94836054  | 6.766595946 | 6.514006798 |             |             |
| SNRNP48     | 6.733116658 | 7.33316658  | 5.564070154 | 6.281427168 | 6.281427168 | 6.281427168 | 6.281427168 | 6.281427168 | 6.281427168 | 6.281427168 | 6.281427168 | 6.281427168 | 6.281427168 | 6.281427168 | 6.281427168 | 6.281427168 | 6.281427168 | 6.281427168 |
| CNNB1P1     | 6.981595053 | 6.76047417  | 6.715119713 | 7.121991379 | 6.993146997 | 6.84238822  | 6.13202772  | 6.55094271  | 6.57422699  | 5.900288877 | 7.090291286 | 6.077861292 | 6.631521279 | 6.763391836 | 6.679393186 | 6.652631956 |             |             |
| HDAC4       | 5.794977262 | 6.154254682 | 7.184257257 | 6.475546542 | 7.145381950 | 5.811749083 | 6.660247949 | 6.711701514 | 6.711701514 | 6.711701514 | 6.711701514 | 6.711701514 | 6.711701514 | 6.711701514 | 6.711701514 | 6.711701514 | 6.711701514 | 6.711701514 |
| ZNF750      | 6.22077281  | 6.485119496 | 6.485119496 | 6.485119496 | 6.485119496 | 6.485119496 | 6.485119496 | 6.485119496 | 6.485119496 | 6.485119496 | 6.485119496 | 6.485119496 | 6.485119496 | 6.485119496 | 6.485119496 | 6.485119496 | 6.485119496 | 6.485119496 |
| PARP15      | 6.643017185 | 5.51655478  | 6.556515112 | 7.495612677 | 7.495612677 | 7.495612677 | 7.495612677 | 7.495612677 | 7.495612677 | 7.495612677 | 7.495612677 | 7.495612677 | 7.495612677 | 7.495612677 | 7.495612677 | 7.495612677 | 7.495612677 | 7.495612677 |
| CDC18       | 5.932234015 | 7.01506274  | 6.654385766 | 6.538146191 | 7.075682571 | 5.783115308 | 6.452717447 | 6.982906527 | 6.325168322 | 6.63062533  | 6.68066671  | 7.252532405 | 6.149206845 | 7.136142858 | 6.765839232 | 6.602136237 | 6.752247674 | 6.82964731  |
| CYB2R1      | 7.276138854 | 6.964167836 | 6.964167836 | 6.964167836 | 6.964167836 | 6.964167836 | 6.964167836 | 6.964167836 | 6.964167836 | 6.964167836 | 6.964167836 | 6.964167836 | 6.964167836 | 6.964167836 | 6.964167836 | 6.964167836 | 6.964167836 | 6.964167836 |
| FAM109B     | 6.675189224 | 6.564224338 | 6.761006188 | 6.928100737 | 6.255794754 | 6.580271552 | 6.978301333 | 6.761362547 | 6.335095006 | 6.604981265 | 6.913948828 | 7.109121747 | 6.88944434  | 7.42344231  | 6.552529415 | 6.973171294 | 7.164762444 | 6.826762244 |
| MECR        | 6.524371825 | 7.189414081 | 7.059694318 | 6.742660981 | 7.017578862 | 6.454997983 | 6.825682237 | 6.418675169 | 6.315890056 | 6.214076145 | 7.292662843 | 5.69823763  | 6.677284973 | 6.824176413 | 6.753800862 | 6.405635145 |             |             |
| TRAF4       | 6.632825153 | 6.745858863 | 6.684425229 | 6.188157117 | 6.124381418 | 7.316214423 | 6.896165277 | 6.984962668 | 6.469940068 | 6.546618813 | 7.035210225 | 6.667197116 | 7.766650669 | 7.363615082 | 6.832040934 | 6.651121667 | 6.661160755 | 7.067350753 |
| ZNF2382     | 6.44521168  | 6.58829646  | 6.720520992 | 6.671794237 | 6.954546294 | 6.798901321 | 6.93465572  | 6.703731461 | 6.88203966  | 6.511196236 | 6.610709569 | 6.59995787  | 6.710930847 | 6.534200716 | 6.508575579 | 6.634991679 | 6.592838982 | 6.592838982 |
| ZSCAN1B     | 6.468970232 | 7.127342724 | 5.824543216 | 6.221266529 | 6.382149235 | 6.129082088 | 6.328112682 | 7.090504099 | 6.328112682 | 7.090504099 | 6.328112682 | 7.090504099 | 6.328112682 | 7.090504099 | 6.328112682 | 7.090504099 | 6.328112682 | 7.090504099 |
| AMN1        | 6.836854873 | 6.718509653 | 5.79375507  | 6.547275909 | 6.222887024 | 6.673989964 | 6.82781554  | 6.708079248 | 6.739220387 | 6.406020925 | 6.733079544 | 6.724082578 | 6.192978966 | 7.642579992 | 6.624105154 | 6.675953788 | 6.761289655 | 6.754819664 |
| MYEF2       | 5.583801575 | 7.388016039 | 5.890343781 | 6.43576438  | 6.90487155  | 5.961834694 | 7.025446437 | 6.694402622 | 6.822559991 | 6.982735893 | 6.680961954 | 5.97870187  | 7.661858535 | 5.584119308 | 6.837799707 | 7.153860645 | 6.917681821 | 7.138388345 |
| LYSMD2      | 7.674805727 | 7.494727146 | 7.124066436 | 7.664263095 | 7.395893589 | 7.159674089 | 5.482735201 | 6.587869144 | 6.574182694 | 6.617393986 | 6.850778167 | 6.386148511 | 6.626245978 | 5.490140535 | 6.007066694 | 6.9233775   | 5.996710934 | 6.285332462 |
| Corf56      | 5.774742359 | 6.987668235 | 5.619773836 | 6.81403795  | 6.291029548 | 7.484261428 | 6.831739277 | 6.508886255 | 6.814387316 | 6.755833392 | 6.372070868 | 6.733225992 | 6.601493862 | 6.96411389  | 7.542162137 | 6.813638436 |             |             |
| CKB         | 6.712384053 | 6.65142952  | 6.68182556  | 6.092760099 | 7.391174134 | 6.945647333 | 6.784792334 | 6.546096288 | 6.546618813 | 7.035210225 | 6.667197116 | 7.766650669 | 7.363615082 | 6.832040934 | 6.651121667 | 6.661160755 | 7.067350753 | 7.067350753 |
| ZNF578      | 7.732952263 | 6.461656621 | 6.199439888 | 6.380131413 | 6.584925494 | 6.449640458 | 6.589304438 | 6.885206063 | 6.584793728 | 6.727422969 | 6.710745768 | 6.935479717 | 6.910414623 | 6.253806042 | 7.240688319 | 6.934360252 | 6.690       |             |



|            |              |             |             |             |             |             |             |             |             |             |             |             |             |             |             |             |             |             |
|------------|--------------|-------------|-------------|-------------|-------------|-------------|-------------|-------------|-------------|-------------|-------------|-------------|-------------|-------------|-------------|-------------|-------------|-------------|
| LUNC00116  | 6.683349901  | 7.112184135 | 6.974107423 | 6.32936912  | 6.70658299  | 7.341907257 | 6.498024351 | 6.50653687  | 6.70448664  | 6.75258916  | 6.423802593 | 6.627278639 | 6.792041798 | 6.345362001 | 6.404505023 | 6.269048459 | 6.886029902 | 6.559901961 |
| TWY1B      | 7.123461213  | 6.793208972 | 5.926812959 | 6.793784621 | 7.11497375  | 6.744008833 | 5.939690993 | 6.534120662 | 6.978820986 | 7.064562336 | 6.355309362 | 6.193957385 | 6.956008454 | 6.832755182 | 6.445079039 | 6.607896419 | 6.779848658 | 6.151671017 |
| DAGLB      | 7.344407727  | 7.099772747 | 7.02451916  | 6.311027562 | 6.182136958 | 7.306136205 | 5.864738198 | 6.788408576 | 6.34988044  | 6.724243353 | 6.660974538 | 6.887044428 | 5.919996168 | 5.739691608 | 6.627973253 | 6.389388523 | 6.627872519 | 7.188732513 |
| FEM1A      | 6.546593927  | 6.673463904 | 6.678546041 | 6.376150634 | 6.467072392 | 6.082335381 | 6.836240138 | 6.987430555 | 6.516688435 | 6.81047855  | 6.539491878 | 6.728087418 | 6.557405267 | 6.839225648 | 6.897952981 | 6.660081411 | 6.820782421 | 6.717447679 |
| PEWACH     | 6.719667713  | 6.580174876 | 6.890714396 | 6.380714396 | 6.875112096 | 6.893330027 | 6.554771896 | 6.599966431 | 6.330446727 | 6.830466777 | 6.806163373 | 5.943509022 | 7.398328988 | 6.300249129 | 6.518739079 | 6.800759870 | 6.111139579 | 6.133139864 |
| MESD1      | 6.174616748  | 6.662575438 | 6.661834395 | 6.662575438 | 6.661834395 | 6.662575438 | 6.661834395 | 6.662575438 | 6.661834395 | 6.662575438 | 6.661834395 | 6.662575438 | 6.661834395 | 6.662575438 | 6.661834395 | 6.662575438 | 6.661834395 | 6.662575438 |
| RNF12L     | 6.664862832  | 6.811780253 | 5.973486658 | 6.011466509 | 6.867730509 | 6.880190085 | 6.426577458 | 7.002004262 | 6.898257584 | 7.02027461  | 6.730079163 | 6.505792537 | 5.952023793 | 6.412151357 | 6.800800516 | 6.68268369  | 7.168680514 | 6.293613774 |
| DCR2       | 6.640514246  | 6.548491113 | 5.934845948 | 6.602282151 | 5.954387644 | 6.777014495 | 6.885117309 | 6.697680232 | 6.335838018 | 6.763130949 | 6.624400778 | 6.494662824 | 7.435255824 | 6.494825636 | 6.743957884 | 6.731099836 | 6.852396458 | 6.241418724 |
| TA1B       | 6.551543872  | 6.107898058 | 6.605786465 | 7.149323031 | 6.926828075 | 6.464905277 | 6.727459788 | 6.916971745 | 6.48325947  | 6.633791644 | 6.322719517 | 6.189807605 | 7.256025889 | 6.826785956 | 7.280128653 | 6.707973936 | 7.00077826  | 7.084463375 |
| MTRF1      | 6.528094812  | 5.528928743 | 7.407656042 | 6.413742117 | 6.716402045 | 6.869637502 | 7.333212624 | 6.454940467 | 6.266048561 | 6.624014855 | 6.313547201 | 6.716902351 | 8.116459144 | 6.095457827 | 6.591491458 | 6.783064349 | 7.77927686  | 6.917591549 |
| FAM59A     | 6.973850907  | 7.407656042 | 6.673154844 | 6.642799328 | 6.389815007 | 7.034295754 | 7.20838941  | 6.421045282 | 6.710425321 | 6.9459299   | 7.059436857 | 5.544472612 | 8.588805239 | 5.444472612 | 6.520081876 | 6.599094095 | 7.402571256 | 6.027511256 |
| CS5A       | 6.653913796  | 6.676205605 | 6.676205605 | 6.676205605 | 6.676205605 | 6.676205605 | 6.676205605 | 6.676205605 | 6.676205605 | 6.676205605 | 6.676205605 | 6.676205605 | 6.676205605 | 6.676205605 | 6.676205605 | 6.676205605 | 6.676205605 | 6.676205605 |
| SCN1       | 6.631317347  | 7.197201538 | 6.202191763 | 5.917861897 | 7.323114396 | 6.146749355 | 6.704555229 | 7.302405467 | 7.259784286 | 6.104849607 | 6.598865106 | 6.042190419 | 6.845970086 | 7.317933704 | 6.94491275  | 6.49621589  |             |             |
| HF2        | 6.46774176   | 5.444931566 | 6.441733461 | 6.944413394 | 5.586358905 | 5.784737266 | 7.18549732  | 6.593314263 | 6.741017002 | 6.969104771 | 7.117006409 | 6.719082256 | 2.89076263  | 6.039523115 | 7.80236739  | 6.927656597 | 6.554343051 | 6.807945744 |
| MYH11      | 6.535007689  | 6.448148786 | 6.660487407 | 6.432283913 | 6.551874993 | 6.594184813 | 6.672849259 | 6.710464276 | 6.651468563 | 6.963432706 | 6.714510643 | 6.605356126 | 6.707576434 | 6.453363144 | 6.020483014 | 6.787890140 | 6.795544304 | 6.590451926 |
| EXD3       | 7.737711018  | 7.101704817 | 6.574914257 | 6.994866049 | 6.184611132 | 6.816516426 | 5.700548317 | 6.502707025 | 6.293919134 | 6.904772288 | 6.382060022 | 7.275583266 | 7.549989789 | 6.378121319 | 6.717266417 | 6.933205224 | 7.194206555 | 6.614396738 |
| OCLN       | 7.330361394  | 7.966543268 | 5.807303275 | 6.249370189 | 5.879045064 | 6.468456296 | 5.756645702 | 6.716301694 | 6.54728294  | 5.97985644  | 6.488452947 | 5.787705981 | 5.78838372  | 7.775325356 | 7.294168899 | 7.30001387  | 5.858933567 |             |
| CCNE1      | 7.334697784  | 5.601699301 | 5.5273149   | 6.717967069 | 6.960476371 | 6.438932176 | 7.126971927 | 6.992724614 | 6.624788666 | 7.034891492 | 6.182240476 | 6.686026697 | 7.730898228 | 5.385398512 | 7.454136639 | 6.019501484 | 6.64175297  | 5.340436391 |
| IFB2PBL    | 7.128630622  | 6.356246869 | 6.892522086 | 6.355782729 | 6.578612605 | 6.579965352 | 6.579965352 | 6.579965352 | 6.579965352 | 6.579965352 | 6.579965352 | 6.579965352 | 6.579965352 | 6.579965352 | 6.579965352 | 6.579965352 | 6.579965352 | 6.579965352 |
| PK3A1      | 5.127740216  | 5.460097069 | 7.680579966 | 6.51741117  | 6.794452999 | 5.13064866  | 5.279243282 | 6.699462504 | 7.458972079 | 6.870599806 | 6.870599806 | 6.870599806 | 6.870599806 | 6.870599806 | 6.870599806 | 6.870599806 | 6.870599806 | 6.870599806 |
| CHURC1-FN1 | 6.890759976  | 6.141805279 | 6.860565316 | 6.148902016 | 6.346534212 | 7.117890589 | 6.303660383 | 6.936366347 | 6.836079373 | 6.435713877 |             |             |             |             |             |             |             |             |
| SOR42E1    | 6.500770945  | 5.274355238 | 5.300070501 | 6.348454816 | 5.687330159 | 5.295226452 | 6.806842896 | 6.826049704 | 6.344541788 | 5.967515171 | 7.802343173 | 5.27097867  | 5.291654456 | 6.759019068 | 6.769383646 | 7.048852475 | 6.716912077 | 6.1561007   |
| TGD1       | 6.141305402  | 7.308791308 | 6.174457156 | 6.761179264 | 6.364132638 | 6.10562571  | 6.498019444 | 7.473394996 | 6.211382875 | 7.396905056 | 6.794504448 | 6.279472244 | 6.121736533 | 6.54941592  | 7.197966387 | 7.319275426 | 7.513624789 | 7.180702847 |
| RIMKLB     | 6.7200427495 | 5.43522505  | 6.9677822   | 6.170216136 | 5.429690966 | 6.701014625 | 6.193162636 | 6.594448183 | 6.675103545 | 6.594448183 | 6.675103545 | 6.595380226 | 7.805989015 | 7.223737911 | 6.710177864 | 6.835417003 | 6.531895821 | 6.634791732 |
| ZNF708     | 6.038582229  | 7.212886474 | 6.612036128 | 6.632580855 | 6.292951676 | 6.493693897 | 7.243703555 | 6.550769952 | 6.33262086  | 6.512998558 | 7.68103098  | 6.642167612 | 7.525643357 | 6.41177983  | 6.88657234  | 6.093344557 | 6.67725976  |             |
| KNP2       | 7.399180669  | 7.271660299 | 6.647030958 | 6.617084937 | 6.661597437 | 7.466314406 | 5.542961126 | 6.349165299 | 6.374266246 | 6.374266246 | 6.485935612 | 6.560093974 | 6.580273574 | 6.968716871 | 7.190203382 | 6.738929894 | 6.31922241  | 6.634152426 |
| CoorT03    | 6.400386962  | 7.051902663 | 6.66408814  | 7.369211037 | 6.945607938 | 6.755959031 | 6.510760747 | 6.629597956 | 6.905281321 | 6.670272484 | 6.276155528 | 6.879979622 | 6.608663582 | 5.642082082 | 6.451856926 | 6.444845114 | 6.71307171  | 6.644430113 |
| PK3A1      | 6.890759976  | 6.141805279 | 6.860565316 | 6.148902016 | 6.346534212 | 7.117890589 | 6.303660383 | 6.936366347 | 6.836079373 | 6.435713877 |             |             |             |             |             |             |             |             |
| ZNF22      | 7.007437614  | 6.955863638 | 6.655863638 | 6.628333399 | 6.889495569 | 6.546542011 | 6.706204367 | 6.472915766 | 6.423485738 | 6.423485738 | 6.472915766 | 6.423485738 | 6.472915766 | 6.423485738 | 6.472915766 | 6.423485738 | 6.472915766 | 6.423485738 |
| UBT2D      | 6.703326221  | 7.130960014 | 6.345782219 | 7.265686415 | 5.55192344  | 6.401286378 | 6.95462707  | 6.455094012 | 6.890710374 | 6.983752033 | 6.656042398 | 7.10739541  | 5.560779626 | 7.185116028 | 6.649826119 | 6.493601617 | 6.569164521 | 6.61775952  |
| BDU13      | 7.233607162  | 7.496904436 | 7.16265678  | 7.496904436 | 7.16265678  | 7.233607162 | 7.496904436 | 7.16265678  | 7.233607162 | 7.496904436 | 7.16265678  | 7.233607162 | 7.496904436 | 7.16265678  | 7.233607162 | 7.496904436 | 7.16265678  | 7.233607162 |
| NFC        | 7.242745618  | 6.879596588 | 7.374869264 | 5.82987824  | 7.008669679 | 5.592792741 | 6.528655724 | 7.4888078   | 6.61999949  | 7.00349285  | 6.562706762 | 6.817454455 | 6.867633323 | 7.514860313 | 6.347093226 | 6.675762825 | 6.628711234 | 6.094211164 |
| FKBP7      | 6.514714612  | 7.147252435 | 6.671258957 | 6.671258957 | 6.671258957 | 6.671258957 | 6.671258957 | 6.671258957 | 6.671258957 | 6.671258957 | 6.671258957 | 6.671258957 | 6.671258957 | 6.671258957 | 6.671258957 | 6.671258957 | 6.671258957 | 6.671258957 |
| UPP2D      | 6.05144335   | 5.826262979 | 6.503982338 | 7.019601543 | 7.033781432 | 6.648680508 | 6.055452465 | 6.81270893  | 6.670188226 | 6.954946078 | 6.92011188  | 6.325483021 | 5.86357805  | 6.450474359 | 7.209303399 | 7.175669597 | 6.796468034 | 6.916571676 |
| PK3A1      | 6.890759976  | 6.141805279 | 6.860565316 | 6.148902016 | 6.346534212 | 7.117890589 | 6.303660383 | 6.936366347 | 6.836079373 | 6.435713877 |             |             |             |             |             |             |             |             |
| HST1H1E    | 6.604914937  | 6.487174055 | 5.980291777 | 6.201283223 | 6.60551368  | 6.19676078  | 6.5186078   | 6.378458388 | 6.77205044  | 6.670568873 | 6.77205044  | 6.670568873 | 6.77205044  | 6.670568873 | 6.77205044  | 6.670568873 | 6.77205044  | 6.670568873 |
| ATAT1      | 6.819208901  | 6.542096548 | 6.613326189 | 6.542096548 | 6.613326189 | 6.542096548 | 6.613326189 | 6.542096548 | 6.613326189 | 6.542096548 | 6.613326189 | 6.542096548 | 6.613326189 | 6.542096548 | 6.613326189 | 6.542096548 | 6.613326189 | 6.542096548 |
| CCDC12     | 6.66099817   | 7.556718362 | 6.62099817  | 7.02557368  | 8.657804033 | 6.550277492 | 6.728702324 | 6.704176188 | 6.945224571 | 6.75886246  | 6.639282836 | 6.167879499 | 5.84214809  | 5.824369449 | 6.509927812 | 6.909342766 | 7.670257907 | 6.146705077 |
| FUNDC1     | 6.578006249  | 6.753918435 | 7.444140956 | 7.145244136 | 7.175988844 | 6.888167136 | 6.50306913  | 6.21857327  | 6.697500757 | 6.63289444  | 6.683613924 | 7.345609021 | 6.659683971 | 6.448950522 | 6.150205164 | 6.190418756 | 6.26223232  | 6.52185694  |
| GLU1       | 7.396132503  | 6.634825753 | 6.65427541  | 6.634825753 | 6.65427541  | 6.634825753 | 6.65427541  | 6.634825753 | 6.65427541  | 6.634825753 | 6.65427541  | 6.634825753 | 6.65427541  | 6.634825753 | 6.65427541  | 6.634825753 | 6.65427541  | 6.634825753 |
| FKBL16     | 6.578608687  | 7.490938382 | 6.655427541 | 6.348211577 | 6.537423059 | 6.704763192 | 6.739217298 | 6.522099605 | 6.889857843 | 6.635567327 | 6.493051061 | 6.7135927   | 6.848202788 | 7.709505967 | 6.636121901 | 6.611346379 | 6.905962671 | 6.109149144 |
| NDFU3A     | 6.553312023  | 6.682160828 | 6.72956496  | 6.389515169 | 6.389515169 | 6.389515169 | 6.389515169 | 6.389515169 | 6.389515169 | 6.389515169 | 6.389515169 | 6.389515169 | 6.389515169 | 6.389515169 | 6.389515169 | 6.389515169 | 6.389515169 | 6.389515169 |
| PK3A1      | 6.890759976  | 6.141805279 | 6.860565316 | 6.148902016 | 6.346534212 | 7.117890589 | 6.3         |             |             |             |             |             |             |             |             |             |             |             |

|           |             |             |             |             |             |             |             |              |             |              |              |              |              |              |              |              |              |              |
|-----------|-------------|-------------|-------------|-------------|-------------|-------------|-------------|--------------|-------------|--------------|--------------|--------------|--------------|--------------|--------------|--------------|--------------|--------------|
| COLGALT1  | 6.225683966 | 6.586779631 | 6.408230467 | 6.395564108 | 6.599942192 | 6.399920975 | 7.18967315  | 7.295998111  | 6.754018335 | 6.766523401  | 7.021219698  | 6.516459322  | 6.03209468   | 6.598915394  | 6.810663093  | 6.78522717   | 6.723213211  | 6.62710796   |
| LARC7A    | 6.819906465 | 6.526164785 | 6.29309459  | 6.773704399 | 7.148025476 | 6.288329567 | 6.393950131 | 6.598902649  | 6.242027516 | 6.39802983   | 6.784529117  | 6.714276745  | 6.746451995  | 6.61823158   | 6.438993984  | 6.462576347  | 6.629762988  | 6.607556164  |
| SEFD1B    | 6.930205397 | 6.830841223 |             | 6.44547014  | 6.140235076 | 7.305523168 | 6.068358814 | 6.689084783  | 6.587892224 | 6.354583881  | 6.617108596  | 6.940120076  | 7.102262708  | 7.2052126    | 6.658211554  | 6.576503319  | 6.595993545  | 6.528488984  |
| HST24AA   | 6.642647216 | 6.714161471 | 6.637945971 | 5.820236559 | 5.932862541 | 6.701052055 | 7.186261176 | 6.684538941  | 6.719790906 | 6.667082101  | 6.697572397  | 6.821844728  | 6.002683057  | 6.756048957  | 6.565031545  | 6.55859819   | 7.324944397  | 6.664701905  |
| COLGAL9   | 6.461173254 | 6.090117766 | 6.090117766 | 6.090117766 | 6.090117766 | 6.090117766 | 6.090117766 | 6.090117766  | 6.090117766 | 6.090117766  | 6.090117766  | 6.090117766  | 6.090117766  | 6.090117766  | 6.090117766  | 6.090117766  | 6.090117766  | 6.090117766  |
| THPP      | 6.568357865 | 6.572313934 | 6.45167285  | 6.371378002 | 6.57171696  | 6.57171696  | 6.57171696  | 6.57171696   | 6.57171696  | 6.57171696   | 6.57171696   | 6.57171696   | 6.57171696   | 6.57171696   | 6.57171696   | 6.57171696   | 6.57171696   | 6.57171696   |
| PTG51     | 5.383170537 | 5.374983153 | 7.01667927  | 5.355816139 | 6.724650471 | 5.579832566 | 6.572468236 | 6.554797701  | 7.07288643  | 7.421035991  | 6.455591848  | 6.730205062  | 6.632335397  | 6.205231621  | 6.399232815  | 6.536575208  | 6.953249317  | 6.675414848  |
| IF722     | 6.795170128 | 6.839971122 | 6.596506833 | 5.965002162 | 6.259759944 | 6.839460072 | 6.952903963 | 6.58699646   | 6.616648359 | 6.542627814  | 6.416548624  | 6.687818641  | 6.587527698  | 6.092654262  | 6.488515862  | 6.59989563   | 6.43372320   | 6.465480903  |
| RRAGB     | 6.176231386 | 7.214838461 | 6.414218866 | 6.003722449 | 7.07687904  | 6.2527698   | 5.430096995 | 6.776118433  | 6.627598344 | 6.510947128  | 6.536471649  | 5.42719426   | 6.74429259   | 5.43724174   | 7.376507637  | 6.667091599  | 6.904972668  | 6.454575758  |
| CASB      | 6.583233083 | 6.838483846 |             | 6.032412555 | 6.068206681 | 6.777646404 | 6.921226614 | 6.701073364  | 6.54880886  | 6.618703386  | 6.533146973  | 7.56890379   | 6.562511486  | 6.72434233   | 6.820888479  | 7.063156086  | 6.259486664  | 7.15541927   |
| PP3P91    | 6.733771388 | 6.361963117 | 6.733771388 | 6.26667139  | 6.352198084 | 6.589428116 | 6.911170642 | 7.084491213  | 6.827923497 | 6.81202695   | 6.771549123  | 8.099991044  | 6.561656594  | 6.324084006  | 6.672831134  | 6.470193778  | 6.627494605  |              |
| NLRK1     | 7.42745185  | 6.45769534  | 6.02574157  | 5.744991945 | 6.880119743 | 6.371931748 | 7.081642908 | 6.578169213  | 6.425042008 | 6.650172794  | 6.620808574  | 6.687582822  | 6.846278529  | 5.502833081  | 6.650761269  | 6.293989866  | 6.446929844  | 7.051137755  |
| BRF2      | 6.744585861 | 7.551392813 | 6.59303175  | 6.857777281 | 6.564551305 | 7.2052928   | 6.527374115 | 6.282943428  | 6.629404025 | 6.488358355  | 5.564508745  | 6.205540514  | 6.604420424  | 6.531135985  | 6.453903848  | 6.866240384  |              |              |
| WDRA      | 6.719084073 | 6.881601376 | 7.147121831 | 7.465554573 | 7.130378865 | 5.796283516 | 7.380047591 | 6.411470403  | 6.540156012 | 6.560173592  | 6.154817882  | 6.885430044  | 6.202193087  | 6.451695757  | 6.921542786  | 6.346893973  | 6.506290292  | 6.637167151  |
| OTUDB8    | 6.68348258  | 6.763878833 | 6.781460941 | 6.781460941 | 6.781460941 | 6.781460941 | 6.781460941 | 6.781460941  | 6.781460941 | 6.781460941  | 6.781460941  | 6.781460941  | 6.781460941  | 6.781460941  | 6.781460941  | 6.781460941  | 6.781460941  | 6.781460941  |
| GPALP11   | 6.35892990  | 7.10895103  | 6.58007801  | 6.153030513 | 6.186772334 | 6.239761272 | 6.428148019 | 7.021702018  | 6.066857284 | 6.650385274  | 6.759176366  | 6.189363748  | 6.459252523  | 6.504635783  | 7.15105921   | 6.934058735  | 6.90918485   | 7.407903945  |
| CPED1     | 6.620642642 | 6.876652453 | 5.675191541 | 6.383888426 | 5.469591136 | 5.387010995 | 6.99289094  | 7.212378751  | 6.73515698  | 6.743856245  | 5.426168804  | 6.242238982  | 6.566373057  | 6.663997844  | 6.660729214  | 6.570145452  | 6.33170418   |              |
| SU1       | 7.117403141 | 6.294723482 | 6.091052028 | 6.296144226 | 6.776123795 | 7.198948494 | 6.641652687 | 6.580539444  | 6.901661945 | 6.488089923  | 6.574559637  | 6.306181564  | 6.885152622  | 6.850363658  | 6.667969664  | 6.301159864  | 6.609898473  | 6.584295407  |
| Chor3f    | 6.741404744 | 6.639174528 | 7.098664366 | 6.798664366 | 6.798664366 | 6.798664366 | 6.798664366 | 6.798664366  | 6.798664366 | 6.798664366  | 6.798664366  | 6.798664366  | 6.798664366  | 6.798664366  | 6.798664366  | 6.798664366  | 6.798664366  | 6.798664366  |
| SPB2      | 6.38516508  | 7.028738971 | 6.71638466  | 6.19657486  | 6.688527591 | 5.996448333 | 6.714270876 | 6.77826015   | 6.364562504 | 6.939088117  | 6.499781909  | 6.477336168  | 7.266998163  | 6.441503321  | 6.709962252  | 6.141786548  | 7.156450084  | 6.686845889  |
| PE76      | 6.449178809 | 6.604356801 | 6.678394476 | 6.480294283 | 6.841796378 | 6.841796378 | 6.841796378 | 6.841796378  | 6.841796378 | 6.841796378  | 6.841796378  | 6.841796378  | 6.841796378  | 6.841796378  | 6.841796378  | 6.841796378  | 6.841796378  | 6.841796378  |
| STX6      | 6.457117396 | 6.369561532 | 5.639490288 | 5.57831395  | 5.566125517 | 5.872726235 | 6.696487    | 6.609614264  | 6.77432064  | 6.609614264  | 6.609614264  | 6.609614264  | 6.609614264  | 6.609614264  | 6.609614264  | 6.609614264  | 6.609614264  | 6.609614264  |
| ADPRH     | 7.609936579 | 6.422780548 | 5.244267089 | 5.202512054 | 7.058382804 | 5.294350065 | 5.252599828 | 6.59911328   | 6.626352178 | 6.82141493   | 6.764476709  | 5.805262521  | 7.283776279  | 5.260254681  | 6.699058356  | 7.049192028  | 6.304211012  | 6.298881662  |
| BLM       | 6.841036171 | 7.435851839 | 7.054609518 | 5.40120297  | 6.945603694 | 6.89403488  | 5.71515863  | 6.825788053  | 5.895312726 | 5.501734498  | 6.047033617  | 7.304603961  | 6.61105451   | 6.83027792   | 6.773259501  | 6.61105451   | 6.83027792   | 6.773259501  |
| CRX04     | 6.878970024 | 6.734352843 | 6.916545585 | 6.59104129  | 6.515102666 | 6.505791728 | 6.363517302 | 6.591082705  | 6.55758891  | 6.711308571  | 6.511168166  | 6.424175309  | 6.657941753  | 6.686849104  | 6.507907028  | 6.829954161  | 6.808713558  | 6.73783882   |
| FEPA1     | 6.205120329 | 7.573268008 | 5.438153076 | 6.29799681  | 7.09678163  | 6.463011311 | 5.444966012 | 6.925959041  | 6.768759534 | 6.805605807  | 6.268710098  | 6.624781344  | 6.578903533  | 7.183051732  | 6.566247972  | 6.725392056  | 6.818625538  | 6.6142201    |
| VVAW7     | 6.914072056 | 7.33307739  | 5.970930034 | 7.073621139 | 6.442286513 | 7.019315789 | 6.726752628 | 6.545228816  | 6.420506907 | 6.713781352  | 6.489297389  | 6.974190384  | 5.778860596  | 5.858999544  | 6.638484518  | 6.709974309  | 6.538440064  | 6.564969894  |
| TK10      | 6.437595001 | 6.73977734  | 6.359630011 | 6.73977734  | 6.359630011 | 6.73977734  | 6.359630011 | 6.73977734   | 6.359630011 | 6.73977734   | 6.359630011  | 6.73977734   | 6.359630011  | 6.73977734   | 6.359630011  | 6.73977734   | 6.359630011  | 6.73977734   |
| PHAP1     | 5.414780519 | 5.577474584 | 5.336016121 | 5.326783918 | 5.540077097 | 7.054615966 | 6.725200883 | 6.632528816  | 6.735225913 | 6.321441761  | 6.979562318  | 7.800206241  | 6.785538482  | 6.644034382  | 6.438476318  | 6.510976719  | 6.66576833   |              |
| MALPIC3B2 | 6.750225731 | 6.672894716 | 6.387248703 | 6.396809713 | 6.681568374 | 6.6959736   | 6.712284472 | 6.442218186  | 6.792118017 | 6.335370873  | 6.526549848  | 6.410584008  | 6.784164144  | 6.566242785  | 6.55436168   | 6.699301192  | 6.042739312  | 6.61182141   |
| DBR1      | 6.96547022  | 6.672470543 | 6.672470543 | 6.672470543 | 6.672470543 | 6.672470543 | 6.672470543 | 6.672470543  | 6.672470543 | 6.672470543  | 6.672470543  | 6.672470543  | 6.672470543  | 6.672470543  | 6.672470543  | 6.672470543  | 6.672470543  | 6.672470543  |
| FAM219A   | 6.577840074 | 6.875774256 | 6.548737256 | 6.370421242 | 6.166804972 | 6.728072917 | 6.031769203 | 6.680726714  | 6.640690905 | 6.679062589  | 6.65172706   | 6.401957201  | 6.877480842  | 6.661217598  | 6.597269094  | 6.566738616  | 6.626148657  | 6.319028054  |
| MKL2      | 6.98393890  | 5.925315534 | 6.05279616  | 6.07291622  | 6.679614722 | 6.068845467 | 6.163858458 | 6.5885454    | 6.5885454   | 6.5885454    | 6.5885454    | 6.5885454    | 6.5885454    | 6.5885454    | 6.5885454    | 6.5885454    | 6.5885454    | 6.5885454    |
| HOMZ6     | 5.894532973 | 6.649187718 | 5.586556484 | 6.768066941 | 6.272341761 | 7.134303563 | 7.103599622 | 6.367476024  | 6.711891289 | 6.481303314  | 6.316173748  | 7.00570653   | 7.31229125   | 6.857106292  | 6.207775416  | 6.387827973  | 6.3193083    | 6.956577694  |
| FRP9      | 7.24079229  | 5.975051816 | 5.875051816 | 6.805779445 | 7.114802973 | 6.114802973 | 5.925256549 | 6.539799184  | 6.471273758 | 6.52572649   | 6.52572649   | 6.52572649   | 6.52572649   | 6.52572649   | 6.52572649   | 6.52572649   | 6.52572649   | 6.52572649   |
| SBF2      | 6.208765237 | 6.157190202 | 5.13580483  | 5.62043574  | 6.063867343 | 6.654990929 | 6.705862927 | 6.1364709327 | 6.653862927 | 6.1364709327 | 6.1364709327 | 6.1364709327 | 6.1364709327 | 6.1364709327 | 6.1364709327 | 6.1364709327 | 6.1364709327 | 6.1364709327 |
| IGF8B6    | 6.654083014 | 6.2340533   | 6.658265675 | 6.842599229 | 6.697108553 | 6.60729658  | 6.070380954 | 6.527725048  | 6.587896147 | 6.534904272  | 6.572952462  | 6.988777204  | 6.274695897  | 7.194004012  | 6.881098425  | 6.29840429   | 6.201515121  | 6.439616057  |
| MSFB4     | 6.655221972 | 5.837114498 | 6.305674836 | 6.572391221 | 6.61500232  | 5.742925309 | 6.716574785 | 6.737495102  | 6.833888703 | 6.992073808  | 6.752065613  | 6.541399288  | 7.020358184  | 5.971537679  | 6.206269874  | 6.465366749  | 6.918500695  | 6.60350966   |
| TJP3      | 6.679373854 | 5.444207335 | 6.598727467 | 7.029815542 | 5.436354472 | 6.53808009  | 6.483795918 | 6.314558106  | 6.873962739 | 6.537236319  | 6.261800844  | 6.809858491  | 7.040147659  | 7.99149581   | 6.932481856  | 6.134224789  | 5.554460713  | 7.5854881    |
| SAYS01D   | 6.612741052 | 6.191919555 | 6.58989807  | 6.632226819 | 6.457952722 | 6.786227311 | 6.932521204 | 6.648821452  | 6.540138054 | 6.650850852  | 6.648821452  | 6.650850852  | 6.650850852  | 6.650850852  | 6.650850852  | 6.650850852  | 6.650850852  | 6.650850852  |
| ZCHC3     | 7.063474836 | 6.651151683 | 6.317486034 | 6.611489808 | 6.561351603 | 6.399653373 | 6.590239529 | 7.057104429  | 6.671013164 | 6.477977166  | 6.384422198  | 6.232044251  | 5.876432077  | 6.646235077  | 6.603765038  | 6.650209334  | 6.460228523  | 6.388956573  |
| GRPC5C    | 6.675334004 | 6.754797562 | 5.452635715 | 7.194948005 | 6.725392581 | 6.894056281 | 6.15434243  | 6.501226664  | 6.729003156 | 6.678225629  | 6.678225629  | 6.678225629  | 6.678225629  |              |              |              |              |              |



|           |             |             |              |             |             |              |             |             |             |               |             |              |             |             |             |             |             |             |
|-----------|-------------|-------------|--------------|-------------|-------------|--------------|-------------|-------------|-------------|---------------|-------------|--------------|-------------|-------------|-------------|-------------|-------------|-------------|
| RAP1GAP2  | 5.71417859  | 5.41441768  | 6.416214238  | 6.803758826 | 5.410216431 | 6.088648227  | 7.365699701 | 6.904148372 | 6.484063474 | 6.548713797   | 6.617356144 | 6.535884738  | 8.575822307 | 6.915298968 | 6.59344104  | 6.470549729 | 6.460057568 | 6.338878563 |
| CAF       | 6.175155146 | 5.725609963 | 7.123792191  | 7.152669178 | 5.622545471 | 5.558906609  | 7.229704658 | 6.386175851 | 6.437001032 | 6.755378118   | 8.862034367 | 6.720853759  | 6.643280635 | 6.745063325 | 6.692447636 | 5.732973489 |             |             |
| CEP162    | 6.821180093 | 5.709081315 | 6.198417609  | 7.541877776 | 5.875150521 | 5.432122742  | 6.873102497 | 6.270104189 | 6.595203247 | 6.582679865   | 6.420450821 | 6.620476176  | 6.102325065 | 6.24011336  | 6.706356021 | 6.161852792 | 6.554957539 | 6.178808104 |
| UVELD     | 6.036959884 | 5.784447618 | 5.501118511  | 6.6688104   | 6.993299815 | 6.523879048  | 6.777509749 | 6.605808814 | 6.503784949 | 6.790715407   | 6.5527954   | 5.607236471  | 5.83983767  | 6.201262509 | 6.369961076 | 6.445912117 | 6.662259174 | 5.821637772 |
| LVGCG     | 6.804918977 | 7.116091496 | 6.685558603  | 6.520258113 | 6.70878224  | 6.512794174  | 6.527794174 | 6.527794174 | 6.512794174 | 6.450032477   | 6.713009113 | 6.5644779947 | 6.483151726 | 6.704389184 | 6.564779987 | 6.483151726 | 6.302790569 | 6.34047908  |
| PECR      | 5.627063686 | 5.627063686 | 5.627063686  | 5.627063686 | 5.627063686 | 5.627063686  | 5.627063686 | 5.627063686 | 5.627063686 | 5.627063686   | 5.627063686 | 5.627063686  | 5.627063686 | 5.627063686 | 5.627063686 | 5.627063686 | 5.627063686 | 5.627063686 |
| NDOR1     | 5.927923742 | 5.432603787 | 5.590010596  | 6.456102139 | 6.182604584 | 6.670974405  | 6.571270862 | 6.301629948 | 6.392359628 | 6.740625516   | 6.487786038 | 6.764850223  | 6.373053118 | 5.442326782 | 6.817629667 | 6.791915332 | 6.511682779 | 6.504882104 |
| CSF2      | 5.403521136 | 7.848441123 | 6.67824517   | 6.67824517  | 6.67824517  | 6.67824517   | 6.67824517  | 6.67824517  | 6.67824517  | 6.67824517    | 6.67824517  | 6.67824517   | 6.67824517  | 6.67824517  | 6.67824517  | 6.67824517  | 6.67824517  | 6.67824517  |
| MPEP      | 6.970653106 | 6.104366343 | 5.376742564  | 5.448315967 | 7.138663345 | 7.085938487  | 6.668704675 | 6.402087145 | 6.513280479 | 6.246380777   | 6.591891915 | 6.478868631  | 5.946096222 | 7.268821578 | 5.915213704 | 6.256048097 | 6.464225079 | 7.120630933 |
| HSPAL01   | 5.666286418 | 6.387905737 | 5.934337518  | 5.940236642 | 5.940236642 | 5.940236642  | 5.940236642 | 5.940236642 | 5.940236642 | 5.940236642   | 5.940236642 | 5.940236642  | 5.940236642 | 5.940236642 | 5.940236642 | 5.940236642 | 5.940236642 | 5.940236642 |
| Mar-02    | 7.238028676 | 7.155924867 | 7.238028676  | 7.238028676 | 7.238028676 | 7.238028676  | 7.238028676 | 7.238028676 | 7.238028676 | 7.238028676   | 7.238028676 | 7.238028676  | 7.238028676 | 7.238028676 | 7.238028676 | 7.238028676 | 7.238028676 | 7.238028676 |
| SK36      | 5.11135051  | 5.899204611 | 5.576686899  | 5.531574865 | 5.988898913 | 5.524804797  | 7.227120202 | 7.468914382 | 6.40091934  | 6.204276772   | 7.292099965 | 6.802648885  | 7.456196032 | 5.527500649 | 5.688629995 | 7.149361891 | 6.735480946 | 7.611434582 |
| PP1A3     | 6.811077616 | 6.387905737 | 6.387905737  | 6.387905737 | 6.387905737 | 6.387905737  | 6.387905737 | 6.387905737 | 6.387905737 | 6.387905737   | 6.387905737 | 6.387905737  | 6.387905737 | 6.387905737 | 6.387905737 | 6.387905737 | 6.387905737 | 6.387905737 |
| ABCC5     | 7.143970837 | 6.756095658 | 5.207647582  | 6.738956856 | 5.209303562 | 6.877488573  | 5.214331137 | 6.628096084 | 6.53915348  | 6.712501196   | 6.91899102  | 5.210610929  | 5.210802286 | 5.847196445 | 6.959737545 | 6.461575879 | 6.443351543 | 6.670528584 |
| CD8       | 6.02512166  | 7.122353163 | 6.04947221   | 6.937688885 | 6.893172529 | 6.75068924   | 6.791520666 | 6.75068924  | 6.791520666 | 6.75068924    | 6.791520666 | 6.75068924   | 6.791520666 | 6.75068924  | 6.791520666 | 6.75068924  | 6.791520666 | 6.75068924  |
| PER2      | 6.124684839 | 6.737183211 | 7.112511279  | 5.830745964 | 5.608097567 | 5.576071617  | 5.695640412 | 7.147740151 | 6.416584541 | 6.143320729   | 6.749975309 | 6.694261021  | 6.080426959 | 6.116203896 | 6.653171373 | 6.786762217 | 6.474844337 | 7.14177317  |
| WARS2     | 5.837188517 | 5.897488167 | 7.297438282  | 5.894881867 | 5.596268827 | 5.586475799  | 7.347813217 | 6.320911858 | 6.973470361 | 6.47265061    | 6.40003623  | 5.393426384  | 7.03423933  | 6.302987794 | 6.317933279 | 6.603052156 | 6.488609894 | 6.542156651 |
| MROH8     | 6.474997128 | 6.338516648 | 5.965340929  | 5.965340929 | 5.965340929 | 5.965340929  | 5.965340929 | 5.965340929 | 5.965340929 | 5.965340929   | 5.965340929 | 5.965340929  | 5.965340929 | 5.965340929 | 5.965340929 | 5.965340929 | 5.965340929 | 5.965340929 |
| YEA101    | 5.522717376 | 7.137748931 | 6.728590974  | 6.68348016  | 7.03534671  | 6.258212603  | 6.342533663 | 6.601997991 | 6.470149098 | 6.434963589   | 6.644954164 | 6.613241725  | 6.383572082 | 6.198288196 | 6.636900041 | 6.456551606 | 6.477803464 |             |
| PXN1A1    | 6.014862931 | 5.843649331 | 5.378001422  | 6.477250443 | 5.557984701 | 6.957261952  | 5.700899825 | 6.795777712 | 6.784368613 | 6.42638613    | 6.475267077 | 6.577384453  | 5.589155783 | 6.154565753 | 6.580870457 | 6.536059472 | 6.614957407 | 6.485241864 |
| TMEM15B   | 6.937613099 | 6.459868096 | 6.273417828  | 6.705650709 | 6.273417828 | 6.273417828  | 6.273417828 | 6.273417828 | 6.273417828 | 6.273417828   | 6.273417828 | 6.273417828  | 6.273417828 | 6.273417828 | 6.273417828 | 6.273417828 | 6.273417828 | 6.273417828 |
| TBC1D4    | 6.964103609 | 6.546306392 | 5.829253086  | 5.829253086 | 5.829253086 | 5.829253086  | 5.829253086 | 5.829253086 | 5.829253086 | 5.829253086   | 5.829253086 | 5.829253086  | 5.829253086 | 5.829253086 | 5.829253086 | 5.829253086 | 5.829253086 | 5.829253086 |
| ARNTL2    | 5.934968239 | 5.416551372 | 6.3636563425 | 5.417295861 | 6.496073819 | 5.8263264083 | 6.126331411 | 7.397248944 | 6.906794191 | 6.453906516   | 6.897421503 | 6.477089482  | 6.668515723 | 5.46586184  | 7.076133402 | 6.852086241 | 6.25762554  | 6.699998328 |
| PTGR2     | 5.674278924 | 5.674278924 | 5.674278924  | 5.674278924 | 5.674278924 | 5.674278924  | 5.674278924 | 5.674278924 | 5.674278924 | 5.674278924   | 5.674278924 | 5.674278924  | 5.674278924 | 5.674278924 | 5.674278924 | 5.674278924 | 5.674278924 | 5.674278924 |
| FRY12     | 6.115260836 | 7.320923066 | 6.87790498   | 6.87790498  | 6.87790498  | 6.87790498   | 6.87790498  | 6.87790498  | 6.87790498  | 6.87790498    | 6.87790498  | 6.87790498   | 6.87790498  | 6.87790498  | 6.87790498  | 6.87790498  | 6.87790498  | 6.87790498  |
| ZRANB3    | 6.429215729 | 6.864358729 | 5.739259907  | 6.720985526 | 7.392972675 | 5.990437311  | 6.825508817 | 6.337682284 | 6.385235522 | 6.337682284   | 6.385235522 | 6.422400195  | 6.807698174 | 6.929357459 | 6.352584284 | 6.372146481 | 6.953460501 | 6.580050051 |
| TMED7-TCA | 6.821949897 | 5.645584398 | 6.520019734  | 5.686963558 | 6.133748676 | 6.115917373  | 6.166210308 | 6.890609734 | 6.609810302 | 6.21580373    | 6.569572113 | 5.8410567    | 7.295185773 | 5.669532343 | 6.67858399  | 6.399305136 | 6.71120644  | 6.848930639 |
| WNL10     | 6.480135691 | 6.480135691 | 6.480135691  | 6.480135691 | 6.480135691 | 6.480135691  | 6.480135691 | 6.480135691 | 6.480135691 | 6.480135691   | 6.480135691 | 6.480135691  | 6.480135691 | 6.480135691 | 6.480135691 | 6.480135691 | 6.480135691 | 6.480135691 |
| NRM       | 5.373972809 | 6.495400708 | 5.684557386  | 6.844837933 | 5.546613557 | 6.418708964  | 6.697172142 | 5.374152861 | 6.393554641 | 6.289863176   | 6.55170684  | 6.924385269  | 6.963151484 | 5.329323296 | 6.515030963 | 6.32542918  | 6.722688914 | 6.595506334 |
| Seq-05    | 6.341285965 | 6.465570673 | 6.395726455  | 6.708584274 | 6.446186713 | 6.749922704  | 6.685489953 | 6.398017615 | 6.860106547 | 5.18647554    | 6.445917142 | 6.656824864  | 5.530169671 | 5.861416487 | 6.541767051 | 7.042898848 | 6.447572598 | 6.019350041 |
| AXIN1     | 6.727405951 | 7.131835369 | 7.015482765  | 6.727405951 | 6.496026573 | 6.488399503  | 6.188279901 | 6.384399133 | 6.482527981 | 6.263641061   | 6.384399133 | 6.482527981  | 6.263641061 | 6.319605021 | 6.635099807 | 6.275928602 | 6.617788166 |             |
| DNAJC6    | 5.317691053 | 6.139096689 | 7.103275313  | 6.13909711  | 6.535999222 | 5.602104279  | 6.692771156 | 7.175967377 | 6.149371702 | 7.384167831   | 6.185596592 | 5.573157998  | 7.20156373  | 6.614820092 | 6.699941646 | 6.52299821  | 6.38439032  |             |
| SECTM1    | 6.765510804 | 6.332578936 | 6.487273584  | 6.450309106 | 6.740139318 | 6.564807866  | 6.568882916 | 6.054300497 | 6.43872086  | 6.43788361    | 7.05328779  | 6.565386655  | 6.608290009 | 6.217765071 | 6.456395756 | 6.284558062 | 6.788529828 |             |
| ZDA       | 7.182351443 | 6.836014946 | 5.406697585  | 6.700302352 | 6.497589647 | 5.871313108  | 6.057368842 | 6.515736451 | 5.862352231 | 6.171101173   | 6.161396223 | 6.540773008  | 5.409327357 | 6.931785128 | 6.199614494 | 7.091878362 | 5.953398443 | 6.217395887 |
| WNL10     | 6.480135691 | 6.480135691 | 6.480135691  | 6.480135691 | 6.480135691 | 6.480135691  | 6.480135691 | 6.480135691 | 6.480135691 | 6.480135691   | 6.480135691 | 6.480135691  | 6.480135691 | 6.480135691 | 6.480135691 | 6.480135691 | 6.480135691 | 6.480135691 |
| NF61      | 5.681950464 | 7.473280602 | 5.737020517  | 7.44804064  | 5.737020517 | 7.44804064   | 5.737020517 | 7.44804064  | 5.737020517 | 7.44804064    | 5.737020517 | 7.44804064   | 5.737020517 | 7.44804064  | 5.737020517 | 7.44804064  | 5.737020517 | 7.44804064  |
| NF568     | 6.604640236 | 5.685191754 | 5.732524687  | 7.433262291 | 6.857774363 | 5.571342274  | 5.667594867 | 6.381499341 | 6.340067008 | 5.645213065   | 6.357311908 | 6.202126253  | 7.12441668  | 7.044904993 | 6.516190222 | 6.764486049 | 6.581343605 | 6.651006979 |
| GSTO2     | 5.821541967 | 7.024843707 | 6.50458301   | 6.93767494  | 6.312982285 | 6.695623985  | 6.109438873 | 6.443047823 | 6.601948873 | 6.443047823   | 6.601948873 | 6.443047823  | 6.601948873 | 6.443047823 | 6.601948873 | 6.443047823 | 6.601948873 | 6.443047823 |
| METTL18   | 6.687506613 | 7.415168753 | 6.900367524  | 7.545315261 | 6.46542198  | 7.950640682  | 6.212838338 | 6.505475736 | 6.185467742 | 6.20346205    | 6.431157956 | 7.385193825  | 5.461500554 | 6.56808355  | 6.316890524 | 6.005580616 | 6.295929284 | 6.211553268 |
| MMD       | 5.461874876 | 6.215244491 | 6.546900101  | 6.546900101 | 6.546900101 | 6.546900101  | 6.546900101 | 6.546900101 | 6.546900101 | 6.546900101   | 6.546900101 | 6.546900101  | 6.546900101 | 6.546900101 | 6.546900101 | 6.546900101 | 6.546900101 | 6.546900101 |
| HUA-G     | 6.574421474 | 6.43925282  | 6.466669926  | 6.29473665  | 6.458235679 | 5.68955023   | 5.522103347 | 6.392141879 | 6.324217269 | 6.383220468   | 6.34634005  | 6.58899874   | 6.547791239 | 6.633693576 | 6.318192766 | 6.32837076  | 6.48077506  | 6.21444896  |
| LPN2      | 6.420050934 | 7.04966417  | 5.41020826   | 6.420050934 | 5.41020826  | 6.420050934  | 5.41020826  | 6.420050934 | 5.41020826  | 6.420050934</ |             |              |             |             |             |             |             |             |

|             |             |             |              |             |              |             |              |              |             |             |             |             |             |             |             |             |             |             |
|-------------|-------------|-------------|--------------|-------------|--------------|-------------|--------------|--------------|-------------|-------------|-------------|-------------|-------------|-------------|-------------|-------------|-------------|-------------|
| COA7        | 6.38535233  | 5.505423817 | 5.565232201  | 6.35815331  | 6.30762464   | 6.890372988 | 6.431358032  | 6.699888093  | 6.750266704 | 6.551458713 | 6.310119188 | 6.519761642 | 5.567301776 | 6.800687507 | 6.891674602 | 6.215812382 | 6.195847247 | 7.097037923 |
| CVBB        | 6.360833114 | 5.323796064 | 5.286785394  | 6.68315231  | 5.147287285  | 5.163698515 | 6.736035813  | 7.097737616  | 6.777176567 | 6.477222449 | 6.445412968 | 5.523699246 | 5.463208575 | 5.899891451 | 7.469775314 | 6.944383014 | 6.972362845 | 5.758947898 |
| GRPEL2      | 5.562923755 | 6.488748055 | 6.372374552  | 6.64478524  | 6.039662888  | 7.265776865 | 6.8666214071 | 6.312989009  | 6.390775567 | 6.213568122 | 6.449363606 | 7.525045014 | 5.420868213 | 7.204567892 | 6.13634971  | 6.259144135 | 6.432190792 | 6.438575416 |
| ETFBM08     | 5.513096082 | 7.378680083 | 5.467246417  | 5.82073634  | 5.182073464  | 7.120930414 | 6.6661042316 | 6.1751684602 | 6.323998072 | 6.448387376 | 5.925979144 | 6.266159856 | 5.633013311 | 6.628164191 | 6.744296198 | 6.625000128 | 6.640409358 | 6.355906183 |
| ZTBM6       | 5.341130278 | 6.423179759 | 6.032490438  | 6.970772451 | 5.48532984   | 6.970772451 | 5.967344771  | 6.713328045  | 6.639768946 | 6.321368013 | 6.379819568 | 5.706511231 | 5.381287489 | 6.936808266 | 5.981287489 | 6.366490752 | 6.204181357 | 6.524030504 |
| TIEMH19     | 6.027564311 | 6.092554578 | 6.991450778  | 6.280311157 | 6.235737191  | 6.490092326 | 6.466047263  | 6.043615013  | 6.340745213 | 6.381898952 | 6.275258275 | 6.277049451 | 6.437775375 | 6.412820206 | 6.492588273 | 6.364982819 | 6.384854592 | 5.968871643 |
| TMCO6       | 6.527747064 | 6.488634832 | 6.568549078  | 7.284650479 | 6.401611686  | 5.572726674 | 5.837568713  | 6.398532442  | 6.423415748 | 6.342093533 | 6.27391805  | 6.446317842 | 7.097242579 | 6.552644628 | 6.394728836 | 6.305675725 | 6.213212908 | 5.6836762   |
| INOBE0      | 6.344118358 | 6.429319516 | 6.375019516  | 6.629118418 | 6.422777331  | 6.613439641 | 6.398689662  | 6.422673172  | 6.401145018 | 6.426637121 | 6.27723965  | 6.65117358  | 6.171551557 | 6.959699636 | 6.322945849 | 6.446539059 | 6.707617277 | 6.341796445 |
| ZNF174      | 7.075644876 | 5.891699692 | 6.95563862   | 6.192787247 | 6.32836022   | 7.103447979 | 6.363603925  | 6.333092116  | 6.503430761 | 6.417909285 | 6.287698119 | 6.835681513 | 7.034342081 | 7.0772945   | 6.246179521 | 6.381029419 | 6.285113318 | 6.433272094 |
| BMT2        | 7.184982272 | 6.896123214 | 6.512900093  | 6.629750619 | 6.483019734  | 6.277489442 | 6.697919919  | 7.12778969   | 6.373888469 | 6.367654676 | 6.242014514 | 6.560376232 | 7.017035805 | 6.206925461 | 5.791846642 | 6.583802467 | 6.139093962 | 6.166674267 |
| PACSN19     | 5.986493397 | 6.463501288 | 6.683018689  | 6.441009827 | 5.915029959  | 6.767713448 | 7.1894975    | 6.2927094    | 6.292440512 | 6.262852815 | 6.007252868 | 6.381214065 | 8.557572026 | 6.823132051 | 6.09480225  | 6.492103025 | 5.483145491 | 6.112688491 |
| CTC116      | 5.190374836 | 6.974296436 | 6.220794608  | 6.220794608 | 6.220794608  | 6.220794608 | 6.220794608  | 6.220794608  | 6.220794608 | 6.220794608 | 6.220794608 | 6.220794608 | 6.220794608 | 6.220794608 | 6.220794608 | 6.220794608 | 6.220794608 | 6.220794608 |
| SDGS        | 5.75729706  | 6.908149778 | 5.89906566   | 5.789888718 | 6.162482857  | 6.177204865 | 6.028711118  | 6.879938339  | 6.732300575 | 6.540809667 | 6.97962875  | 6.039928372 | 7.038025959 | 5.981119193 | 6.60058385  | 6.417418188 | 6.650654088 | 6.3757674   |
| RCAP2B      | 5.498175213 | 6.594579877 | 6.92524627   | 5.9388572   | 6.632516549  | 6.617235005 | 6.596469347  | 6.257008079  | 6.354905433 | 6.457196055 | 6.370030059 | 6.78274806  | 5.474599973 | 5.494967046 | 6.337688363 | 6.434746820 | 6.715740684 | 6.628868354 |
| TMTC2       | 6.146291632 | 5.964935601 | 7.73283842   | 5.791790618 | 7.369392725  | 6.598940413 | 6.097976864  | 6.58818847   | 7.133093715 | 6.22106732  | 6.694625463 | 6.188204818 | 5.37268001  | 7.297711723 | 6.578106966 | 7.158421493 | 6.439090392 | 6.358548153 |
| CCR7        | 6.469317532 | 6.466409239 | 6.466409239  | 6.466409239 | 6.466409239  | 6.466409239 | 6.466409239  | 6.466409239  | 6.466409239 | 6.466409239 | 6.466409239 | 6.466409239 | 6.466409239 | 6.466409239 | 6.466409239 | 6.466409239 | 6.466409239 | 6.466409239 |
| CVBSL       | 5.55637815  | 6.58467525  | 6.082530737  | 6.689860973 | 6.4572927876 | 5.73666187  | 6.73734798   | 6.892236973  | 6.53954171  | 6.566247425 | 6.40530886  | 7.034323475 | 7.629833166 | 6.599476141 | 6.657200203 | 6.337951440 | 6.378702605 | 6.783450035 |
| BNB1        | 6.11535847  | 6.378857853 | 6.32553827   | 6.378857853 | 6.29972228   | 6.402815734 | 6.263180261  | 6.764081505  | 6.510857699 | 6.261262528 | 6.50999051  | 6.05211767  | 6.09991286  | 6.612141951 | 6.452317895 | 6.334254295 | 5.666920952 | 5.94754931  |
| LATS2       | 6.222912752 | 6.691219516 | 5.694201989  | 5.98626254  | 6.11145638   | 5.564079876 | 6.417638803  | 6.666076445  | 6.369746867 | 5.581961758 | 6.465740027 | 6.081987573 | 6.844818613 | 6.649120323 | 6.29048618  | 6.093933929 | 6.560212029 | 5.509262187 |
| ARNT1       | 5.647515095 | 7.029616444 | 6.680681449  | 6.585805637 | 6.52136803   | 6.318489117 | 6.318489117  | 6.318489117  | 6.318489117 | 6.318489117 | 6.318489117 | 6.318489117 | 6.318489117 | 6.318489117 | 6.318489117 | 6.318489117 | 6.318489117 | 6.318489117 |
| DIG3        | 6.789075525 | 5.62284745  | 5.272675325  | 5.727322521 | 5.70983702   | 5.279975917 | 5.278705056  | 6.384093585  | 5.708167141 | 5.94708368  | 6.984245962 | 6.565111514 | 5.701277762 | 6.76026823  | 6.925571694 | 6.717593352 | 6.394893583 | 6.582191737 |
| ZNF559      | 6.322831504 | 5.530838452 | 6.889415427  | 6.359291984 | 6.878463552  | 6.466524433 | 7.140662712  | 6.228408554  | 6.472869921 | 6.418437211 | 6.728007306 | 6.854193832 | 5.576841449 | 7.396120988 | 6.43351116  | 6.051436248 | 6.329628454 | 6.414266527 |
| ATPV1E2     | 6.335102483 | 6.326184586 | 6.901190834  | 6.383282616 | 6.452957336  | 6.401716804 | 6.829959484  | 6.492495736  | 6.601788353 | 6.462062668 | 6.810845602 | 5.717003048 | 5.789972789 | 6.44016136  | 6.934254524 | 6.44687586  | 5.872961472 | 6.464687586 |
| ADAMT18     | 5.983160173 | 6.413954022 | 6.364316929  | 6.646414692 | 6.013043782  | 6.165517493 | 6.68469368   | 6.184288708  | 7.1050883   | 6.676997916 | 6.11294893  | 6.010612856 | 6.908993809 | 6.758127435 | 6.73334514  | 7.06471917  | 6.642103951 | 6.788115843 |
| PLEKHA1     | 6.976186911 | 6.149249744 | 6.580247343  | 6.409963901 | 6.36634922   | 5.939925167 | 6.581169704  | 6.720250439  | 6.24224769  | 6.604914033 | 6.729977627 | 6.93357899  | 5.922671026 | 6.568003724 | 6.256775149 | 6.578686548 | 6.471044491 | 6.578686548 |
| ZNF5128     | 6.406419826 | 5.649119826 | 5.610318259  | 6.482005444 | 6.499328808  | 6.436980564 | 6.227369645  | 6.479623866  | 6.140147805 | 6.635397239 | 6.47791885  | 6.441340976 | 5.574786369 | 6.370151895 | 6.02197307  | 6.116718254 | 6.208803546 | 5.936236624 |
| ZNF5128     | 6.406419826 | 5.649119826 | 5.610318259  | 6.482005444 | 6.499328808  | 6.436980564 | 6.227369645  | 6.479623866  | 6.140147805 | 6.635397239 | 6.47791885  | 6.441340976 | 5.574786369 | 6.370151895 | 6.02197307  | 6.116718254 | 6.208803546 | 5.936236624 |
| PKFB2       | 7.207624533 | 6.306619518 | 6.306619518  | 6.400897236 | 7.50918328   | 5.70918328  | 5.70918328   | 5.70918328   | 5.70918328  | 5.70918328  | 5.70918328  | 5.70918328  | 5.70918328  | 5.70918328  | 5.70918328  | 5.70918328  | 5.70918328  | 5.70918328  |
| ACZQ02.1.1  | 6.159894141 | 6.587675355 | 6.512616515  | 6.428152967 | 5.91843671   | 5.734472027 | 5.727336276  | 6.501167253  | 6.337974171 | 6.074597314 | 5.88776265  | 6.912289191 | 6.973305173 | 5.948086451 | 6.61493892  | 6.450502541 | 5.90231988  | 6.272192298 |
| FTM2        | 6.065616223 | 6.326184586 | 5.922149003  | 6.454543926 | 6.327303576  | 7.217079593 | 6.137718785  | 7.013942425  | 6.824315155 | 6.69643078  | 6.434432718 | 5.95368097  | 5.949220057 | 6.571504075 | 6.722067058 | 6.83557288  | 6.705369985 | 6.209561729 |
| TRAF5       | 5.819186866 | 5.704246069 | 5.704390768  | 6.644822816 | 5.987801526  | 5.746920818 | 5.732559805  | 6.864799498  | 6.389841104 | 6.560490704 | 6.36627776  | 6.501791518 | 7.435300016 | 5.890087027 | 6.291025815 | 6.901152998 | 6.746773256 | 6.684880848 |
| CMPE2       | 5.299745305 | 6.804831969 | 6.400817562  | 6.746738501 | 5.721526865  | 5.173257444 | 5.271526865  | 6.391151869  | 6.432717553 | 6.518948349 | 7.24807549  | 5.296828341 | 5.46103284  | 5.992649516 | 6.15730958  | 6.146992249 | 6.704080048 | 6.704080048 |
| LYL1        | 6.078737852 | 6.88332014  | 6.15312064   | 6.616859769 | 7.130906098  | 6.887427212 | 6.493453244  | 6.171419049  | 6.441604833 | 6.358193653 | 6.458451489 | 6.523638951 | 5.846891949 | 5.471829836 | 6.314333076 | 6.397608918 | 6.184419539 | 5.904458804 |
| ZNF5128     | 6.406419826 | 5.649119826 | 5.610318259  | 6.482005444 | 6.499328808  | 6.436980564 | 6.227369645  | 6.479623866  | 6.140147805 | 6.635397239 | 6.47791885  | 6.441340976 | 5.574786369 | 6.370151895 | 6.02197307  | 6.116718254 | 6.208803546 | 5.936236624 |
| RG510       | 6.729250543 | 5.913212135 | 7.302770703  | 7.050773122 | 5.685826263  | 6.484760741 | 6.522805014  | 6.589328071  | 6.589328071 | 6.589328071 | 6.589328071 | 6.589328071 | 6.589328071 | 6.589328071 | 6.589328071 | 6.589328071 | 6.589328071 | 6.589328071 |
| NIUSA1P     | 6.683145036 | 6.132934615 | 7.323052615  | 5.18463165  | 6.478761904  | 6.603493396 | 6.313764036  | 5.904296044  | 6.233435335 | 6.304174866 | 5.384360886 | 6.973957576 | 5.353039438 | 6.847812104 | 6.714293808 | 6.440424893 | 6.454509306 | 6.625458067 |
| FB2         | 6.598375456 | 6.43442765  | 6.317269696  | 6.595199632 | 6.873604962  | 6.86345888  | 6.60345888   | 6.60345888   | 6.60345888  | 6.60345888  | 6.60345888  | 6.60345888  | 6.60345888  | 6.60345888  | 6.60345888  | 6.60345888  | 6.60345888  | 6.60345888  |
| RTEL1-TNFR1 | 6.668397021 | 5.502835833 | 6.1889895721 | 6.09249406  | 6.110646712  | 6.329576958 | 6.446689875  | 6.516291899  | 6.354666449 | 6.785769397 | 6.530987301 | 6.731940498 | 6.157905119 | 6.698911879 | 6.215967371 | 6.396119519 | 6.772457674 | 6.487123008 |
| KDM8        | 5.299749094 | 5.294745727 | 5.294745727  | 5.294745727 | 5.294745727  | 5.294745727 | 5.294745727  | 5.294745727  | 5.294745727 | 5.294745727 | 5.294745727 | 5.294745727 | 5.294745727 | 5.294745727 | 5.294745727 | 5.294745727 | 5.294745727 | 5.294745727 |
| KNC4        | 6.263870876 | 5.394679243 | 6.494636998  | 7.399360448 | 5.403484964  | 7.467758984 | 6.288718661  | 6.768250931  | 6.938298718 | 6.601684713 | 6.48212409  | 6.42296635  | 5.78307287  | 5.898564372 | 7.173228123 | 5.957641454 | 5.92759921  | 5.885440364 |
| RNF157      | 7.340952762 | 5.276827986 | 5.587581343  | 5.78991457  | 5.515727761  | 5.671763888 | 5.589103258  | 6.820502948  | 6.59571049  | 6.491177007 | 6.305212079 | 6.206007584 | 7.589341939 | 6.538234411 | 6.578587016 | 6.360656742 | 6.724930879 | 5.384170419 |
| DNH5        | 6.87904884  | 5.40719355  | 6.959248835  | 6.522805014 | 6.522805014  | 6.5228050   |              |              |             |             |             |             |             |             |             |             |             |             |



|            |              |             |             |             |             |             |             |             |             |             |             |             |             |             |             |             |             |             |
|------------|--------------|-------------|-------------|-------------|-------------|-------------|-------------|-------------|-------------|-------------|-------------|-------------|-------------|-------------|-------------|-------------|-------------|-------------|
| PLAZ66     | 6.9665138    | 5.556274901 | 6.549611431 | 5.486727738 | 6.039005055 | 6.242875063 | 6.604781761 | 6.298898671 | 6.051902067 | 6.546020999 | 5.8329744   | 6.483917664 | 6.380769038 | 6.064518408 | 6.315920771 | 6.300787265 | 6.230768541 | 6.26239576  |
| ARL13B     | 6.213542157  | 5.480528274 | 6.700082896 | 7.031995839 | 6.263110236 | 5.784204332 | 6.452309489 | 6.626834141 | 6.205184582 | 6.666167551 | 6.204635004 | 6.593630466 | 6.518350264 | 5.972799912 | 6.636390790 | 6.003727571 | 6.470796539 | 6.670190636 |
| GAR1       | 6.613217628  | 6.164041286 | 6.112896639 | 6.112896639 | 6.599292626 | 6.069626469 | 6.093541042 | 6.402323126 | 6.411461338 | 6.402323126 | 6.411461338 | 6.411461338 | 6.411461338 | 6.411461338 | 6.411461338 | 6.411461338 | 6.411461338 | 6.411461338 |
| AF0EAC3A   | 5.387632153  | 6.655775655 | 5.319673986 | 5.185390896 | 5.281808906 | 6.180780425 | 5.424229528 | 8.48472173  | 6.142340314 | 6.142340314 | 6.142340314 | 6.142340314 | 6.142340314 | 6.142340314 | 6.142340314 | 6.142340314 | 6.142340314 | 6.142340314 |
| ZNF510     | 6.425727667  | 5.556024657 | 6.379670593 | 6.237965477 | 6.498514966 | 6.709097758 | 6.513431846 | 6.780178138 | 6.077549893 | 6.077549893 | 6.077549893 | 6.077549893 | 6.077549893 | 6.077549893 | 6.077549893 | 6.077549893 | 6.077549893 | 6.077549893 |
| ETEA3      | 5.931472886  | 5.312598801 | 5.741935408 | 5.741935408 | 5.596048911 | 5.596048911 | 5.596048911 | 5.596048911 | 5.596048911 | 5.596048911 | 5.596048911 | 5.596048911 | 5.596048911 | 5.596048911 | 5.596048911 | 5.596048911 | 5.596048911 | 5.596048911 |
| NFAT4C     | 6.5711310611 | 6.344934    | 5.26484018  | 6.809097053 | 5.261397127 | 5.975182688 | 6.254015855 | 6.366566943 | 6.664376449 | 6.035678669 | 6.68251685  | 6.845152023 | 6.267150707 | 5.724274927 | 6.04669263  | 6.013325069 | 6.300673782 | 6.40574789  |
| BCAT1      | 6.744441004  | 6.214059094 | 5.916417411 | 5.751841584 | 6.234789806 | 6.028800461 | 6.639189716 | 6.639189716 | 6.639189716 | 6.639189716 | 6.639189716 | 6.639189716 | 6.639189716 | 6.639189716 | 6.639189716 | 6.639189716 | 6.639189716 | 6.639189716 |
| Clc10r75   | 7.123481994  | 5.89287587  | 6.196438906 | 7.025735865 | 7.200736247 | 6.576599675 | 5.474765615 | 6.083112947 | 6.522424719 | 6.299663496 | 6.397124214 | 5.392595623 | 6.544026345 | 6.211340155 | 5.909025725 | 6.397103071 | 6.307338271 | 6.307338271 |
| SLC23A2    | 5.481302405  | 6.153280933 | 6.650051621 | 6.650051621 | 6.206746461 | 6.892573323 | 6.206746461 | 6.627940522 | 6.658491962 | 6.206746461 | 6.627940522 | 6.658491962 | 6.658491962 | 6.658491962 | 6.658491962 | 6.658491962 | 6.658491962 | 6.658491962 |
| TRM5       | 6.668780625  | 5.792652085 | 5.410230316 | 5.486740152 | 5.468952857 | 6.789268575 | 6.07811224  | 6.702524417 | 6.217628851 | 6.217628851 | 6.217628851 | 6.217628851 | 6.217628851 | 6.217628851 | 6.217628851 | 6.217628851 | 6.217628851 | 6.217628851 |
| IM13       | 5.881962028  | 6.026844311 | 6.841946469 | 5.595354049 | 6.269489567 | 6.207427204 | 6.877105946 | 6.478410654 | 6.253899999 | 6.389210159 | 6.704088188 | 6.555724667 | 5.71173285  | 5.797883173 | 6.932478763 | 5.877046968 | 6.27646116  | 6.094666778 |
| TL11       | 7.232925466  | 7.431058197 | 6.637649391 | 6.696544138 | 6.576488122 | 5.84717809  | 5.784125148 | 6.467708215 | 6.26190931  | 6.229991626 | 5.387972579 | 6.281110786 | 6.044025377 | 6.424188007 | 6.53327219  | 6.044158862 | 6.53327219  | 6.044158862 |
| SPATAS1L   | 6.068078356  | 6.460634357 | 7.036828849 | 6.8415776   | 5.716952664 | 5.927970561 | 6.902026341 | 6.064489792 | 6.3733414   | 6.263526278 | 5.917331874 | 6.644390981 | 7.093885335 | 5.40590376  | 6.276337083 | 6.265965893 | 5.773834608 | 5.90161931  |
| Clorf10E   | 7.038421265  | 6.174453592 | 6.712480259 | 6.401251677 | 6.193896069 | 6.514743702 | 6.094223276 | 6.104181921 | 6.30012385  | 6.265690664 | 6.062169497 | 6.294069406 | 6.546641856 | 6.364816086 | 6.174086586 | 6.174086586 | 6.174086586 | 6.174086586 |
| NHP4       | 5.171880971  | 6.323179121 | 5.165500679 | 5.109597055 | 5.749385115 | 5.173484239 | 6.956237936 | 6.710577875 | 5.947652974 | 6.725970965 | 6.216143487 | 6.624759089 | 6.547051033 | 5.77885731  | 5.722536346 | 6.538539173 | 6.53336965  | 6.327699547 |
| KRTCAP3    | 7.201025782  | 6.665142123 | 6.643273957 | 6.712199956 | 6.023808414 | 6.719599319 | 6.276743053 | 6.786429466 | 6.567663278 | 6.276743053 | 6.872316434 | 5.872316434 | 5.397599186 | 6.261865753 | 5.905247742 | 5.497072517 | 5.9784713   | 7.114586372 |
| MAPRE3     | 5.760398948  | 5.323387273 | 6.401180696 | 6.812605928 | 5.96895392  | 5.47347939  | 5.327800331 | 6.311111869 | 6.308473187 | 6.147576649 | 6.328896756 | 6.220008016 | 6.304758234 | 6.832268729 | 6.403536529 | 6.549594124 | 6.508633225 | 5.890552458 |
| ZNF777     | 5.55173486   | 6.544460077 | 6.135613855 | 6.426390122 | 5.449340464 | 6.442707281 | 6.332159999 | 6.963511109 | 6.187262021 | 6.557890756 | 6.844040024 | 5.34567394  | 7.090739344 | 6.108136813 | 6.548747865 | 6.059087465 | 6.204156013 | 6.204156013 |
| SPNT1      | 5.211312915  | 6.559232447 | 7.208813729 | 6.453672756 | 6.409038636 | 6.110952904 | 6.444215755 | 6.554077563 | 6.554077563 | 6.554077563 | 6.554077563 | 6.554077563 | 6.554077563 | 6.554077563 | 6.554077563 | 6.554077563 | 6.554077563 | 6.554077563 |
| POLA1      | 7.269095004  | 5.195894931 | 6.071781938 | 6.550941244 | 5.202632871 | 5.202632871 | 5.202632871 | 5.202632871 | 5.202632871 | 5.202632871 | 5.202632871 | 5.202632871 | 5.202632871 | 5.202632871 | 5.202632871 | 5.202632871 | 5.202632871 | 5.202632871 |
| PP1R9A     | 5.625605808  | 5.102788688 | 5.075510618 | 5.075510618 | 5.618184941 | 4.70525622  | 6.782321854 | 6.671196103 | 6.671196103 | 6.671196103 | 6.671196103 | 6.671196103 | 6.671196103 | 6.671196103 | 6.671196103 | 6.671196103 | 6.671196103 | 6.671196103 |
| TIGD3      | 5.312963549  | 7.458739491 | 6.345304633 | 6.121774027 | 6.20209285  | 5.906648183 | 5.517448892 | 6.244161973 | 6.342253138 | 6.317721212 | 6.349090952 | 6.324703334 | 5.310389153 | 6.273460869 | 6.256633664 | 6.750744525 | 6.293253019 | 6.101336869 |
| QSOX2      | 6.262151783  | 5.965809731 | 6.264659654 | 6.127382308 | 5.981792109 | 6.177087632 | 6.339234063 | 6.450073363 | 6.114764035 | 5.731419564 | 6.535061041 | 6.16627827  | 6.163825919 | 6.390973845 | 6.271575271 | 6.101664032 | 6.101664032 | 6.101664032 |
| ISY1-RAB43 | 6.401449884  | 6.734169399 | 6.349399484 | 6.239600527 | 6.394061393 | 6.340109762 | 6.344286619 | 6.286823008 | 6.450873899 | 6.605891735 | 6.377920527 | 6.141464895 | 6.872041583 | 6.222656626 | 6.002709011 | 6.206582473 | 6.165845721 | 6.165845721 |
| PTPRN2     | 7.431154238  | 7.469339114 | 6.401168106 | 6.995476009 | 6.262490498 | 5.338972325 | 6.911838923 | 6.262775275 | 6.123395443 | 6.629778152 | 6.70729347  | 5.333861972 | 6.092352123 | 5.97647513  | 5.874626394 | 5.770610155 | 6.266761892 | 6.266761892 |
| ZNF789     | 6.437799949  | 5.845011215 | 6.406272932 | 6.485573155 | 6.013146105 | 6.713976399 | 6.364858589 | 6.203338999 | 5.870918366 | 6.528767859 | 6.078591726 | 6.320840035 | 6.012653887 | 6.507365055 | 6.975412326 | 6.166510083 | 6.262959286 | 6.056656489 |
| ZNF10      | 6.437799949  | 5.845011215 | 6.406272932 | 6.485573155 | 6.013146105 | 6.713976399 | 6.364858589 | 6.203338999 | 5.870918366 | 6.528767859 | 6.078591726 | 6.320840035 | 6.012653887 | 6.507365055 | 6.975412326 | 6.166510083 | 6.262959286 | 6.056656489 |
| ZBT9       | 6.061727266  | 6.613732636 | 6.29237696  | 6.19237696  | 6.370171562 | 6.24870531  | 6.064767269 | 6.064767269 | 6.064767269 | 6.064767269 | 6.064767269 | 6.064767269 | 6.064767269 | 6.064767269 | 6.064767269 | 6.064767269 | 6.064767269 | 6.064767269 |
| THAP8      | 6.948723864  | 6.019901103 | 5.542039171 | 5.845067116 | 6.337180235 | 6.480528768 | 6.99143123  | 6.243728608 | 6.650876915 | 6.423445111 | 5.967731246 | 6.274990948 | 6.440770933 | 7.193270268 | 5.869876594 | 6.004704823 | 6.220453587 | 6.108852871 |
| ZNF17      | 7.465195389  | 6.278534035 | 6.715407535 | 6.278534035 | 6.715407535 | 6.278534035 | 6.715407535 | 6.715407535 | 6.715407535 | 6.715407535 | 6.715407535 | 6.715407535 | 6.715407535 | 6.715407535 | 6.715407535 | 6.715407535 | 6.715407535 | 6.715407535 |
| TC7        | 6.194147663  | 6.049731671 | 6.168165433 | 6.484380066 | 5.762514054 | 5.844791122 | 5.796615665 | 6.464994924 | 6.24984601  | 6.53627146  | 6.285726571 | 6.409957681 | 6.785036909 | 6.968878094 | 6.4162361   | 6.549266373 | 6.230177205 | 6.316044145 |
| TMTC4      | 5.384319662  | 7.37704986  | 6.785499425 | 6.785499425 | 6.625617024 | 5.3653436   | 6.425288186 | 6.421448111 | 6.270470561 | 6.649654321 | 6.002756651 | 5.321197647 | 6.185672056 | 7.761395029 | 6.243917636 | 6.548538348 | 7.103195669 | 7.103195669 |
| ZSCAN5     | 6.630285637  | 6.556302668 | 6.652556216 | 5.73583532  | 6.269150802 | 6.250801276 | 6.514472999 | 6.47483159  | 6.179974545 | 5.989546042 | 6.083714876 | 6.648514958 | 6.422023641 | 5.808237583 | 6.048590459 | 6.000653137 | 6.464378132 | 6.263530208 |
| CORO7-PAM  | 6.360095266  | 5.981375337 | 6.497376521 | 6.390956794 | 6.270496529 | 6.433167569 | 6.26767964  | 6.036292363 | 6.135986207 | 6.135986207 | 6.135986207 | 6.135986207 | 6.135986207 | 6.135986207 | 6.135986207 | 6.135986207 | 6.135986207 | 6.135986207 |
| PANF1H13   | 6.716209089  | 6.492389612 | 6.193589612 | 6.193589612 | 6.30104747  | 6.30104747  | 6.30104747  | 6.30104747  | 6.30104747  | 6.30104747  | 6.30104747  | 6.30104747  | 6.30104747  | 6.30104747  | 6.30104747  | 6.30104747  | 6.30104747  | 6.30104747  |
| SEMAF4     | 5.230013478  | 6.725372239 | 5.266170845 | 7.402460999 | 6.659811637 | 6.642597552 | 5.257376    | 6.407137786 | 6.109405644 | 6.450493538 | 6.659497538 | 5.237339089 | 5.236700196 | 5.241122191 | 6.084211166 | 6.386508592 | 6.102506933 | 6.926849003 |
| NPL        | 6.456274814  | 6.576340282 | 6.42674814  | 6.576340282 | 6.42674814  | 6.576340282 | 6.42674814  | 6.576340282 | 6.42674814  | 6.576340282 | 6.42674814  | 6.576340282 | 6.42674814  | 6.576340282 | 6.42674814  | 6.576340282 | 6.42674814  | 6.576340282 |
| PUS7       | 5.408627162  | 6.114486773 | 5.404284722 | 6.670570729 | 6.422519045 | 6.26554048  | 5.963133563 | 6.019146473 | 6.302140754 | 6.680936798 | 6.33894323  | 5.776209506 | 6.690598701 | 5.420866564 | 6.624022535 | 6.513207287 | 6.242696355 | 6.301698117 |
| TSGA10     | 6.223771674  | 6.223383686 | 6.004887841 | 6.223383686 | 6.004887841 | 6.223383686 | 6.004887841 | 6.223383686 | 6.004887841 | 6.223383686 | 6.004887841 | 6.223383686 | 6.004887841 | 6.223383686 | 6.004887841 | 6.223383686 | 6.004887841 | 6.223383686 |
| Clorf10E   | 6.518727278  | 6.405730667 | 5.738947804 | 5.58714002  | 6.522663262 | 6.305986913 | 5.6054027   | 6.176411831 | 6.342526002 | 6.195073014 | 5.90221851  | 6.30656764  | 6.746168175 | 5.986451708 | 6.46808749  | 6.461962074 | 6.423774465 | 6.423774465 |
| SMIM4      | 6.84347758   | 6.257102086 | 6.382803929 | 5.68        |             |             |             |             |             |             |             |             |             |             |             |             |             |             |

|            |             |             |             |             |             |              |              |             |              |             |              |             |              |             |              |             |              |             |
|------------|-------------|-------------|-------------|-------------|-------------|--------------|--------------|-------------|--------------|-------------|--------------|-------------|--------------|-------------|--------------|-------------|--------------|-------------|
| SLC25A30   | 6.539634325 | 6.05080462  | 6.494331891 | 5.975778837 | 6.078712087 | 5.855229129  | 6.046853547  | 6.757644194 | 6.270884299  | 6.426016938 | 6.415188034  | 5.6232427   | 7.625390581  | 6.015627439 | 6.690536991  | 6.168375855 | 6.311856905  | 5.920844664 |
| ZNF68      | 6.530127711 | 5.962595642 | 6.52251831  | 6.632225591 | 5.422092907 | 6.450233879  | 6.37041005   | 6.117334932 | 6.221407393  | 6.351987127 | 6.300754349  | 6.495261299 | 6.031489386  | 5.850980456 | 6.357180304  | 6.216758015 | 6.142958620  | 6.098610297 |
| TAJF1A     | 6.734372725 | 5.923797206 | 7.204255827 | 6.641127888 | 6.788364631 | 6.224909303  | 6.308140131  | 6.379397171 | 6.030907559  | 5.906674349 | 6.386689503  | 5.989625925 | 5.442837102  | 5.551796152 | 6.469094133  | 6.184816048 | 6.28508411   | 6.079481085 |
| EFCAB11    | 6.295398893 | 5.428689955 | 6.207774188 | 6.413212888 | 5.835779868 | 6.835779868  | 6.249012296  | 5.931912445 | 6.360656603  | 5.931912445 | 6.347483695  | 6.063346444 | 5.576278129  | 5.563396968 | 6.276972204  | 6.02494932  | 6.170272732  | 6.792135884 |
| ZNF28      | 6.763773023 | 6.943843368 | 6.943843368 | 6.943843368 | 6.943843368 | 6.943843368  | 6.943843368  | 6.943843368 | 6.943843368  | 6.943843368 | 6.943843368  | 6.943843368 | 6.943843368  | 6.943843368 | 6.943843368  | 6.943843368 | 6.943843368  | 6.943843368 |
| CD8        | 6.265858149 | 6.196520829 | 6.279993267 | 6.412212888 | 6.412212888 | 6.412212888  | 6.412212888  | 6.412212888 | 6.412212888  | 6.412212888 | 6.412212888  | 6.412212888 | 6.412212888  | 6.412212888 | 6.412212888  | 6.412212888 | 6.412212888  | 6.412212888 |
| M3AP36     | 6.047579995 | 5.605462801 | 6.801349677 | 6.688790848 | 6.646464906 | 5.327093407  | 6.440394178  | 6.264441825 | 5.599233525  | 6.268518084 | 5.840246162  | 5.720954838 | 5.323961387  | 6.273906117 | 6.487569282  | 5.95354996  | 5.673664088  | 6.164100624 |
| ZNF47      | 5.912172892 | 6.510528449 | 6.057528449 | 6.314045791 | 6.232281627 | 5.89127801   | 6.002188346  | 6.787084836 | 5.96097955   | 6.171010834 | 5.204296428  | 6.08491168  | 6.173909269  | 6.430796344 | 6.587090406  | 6.122389697 | 7.006515046  | 6.582521394 |
| SVBP       | 5.952822085 | 6.174127454 | 6.635404206 | 6.586284874 | 7.012142003 | 6.159498781  | 6.065597641  | 6.086638907 | 6.355877468  | 6.149655506 | 6.196826055  | 6.992375657 | 5.739555812  | 7.021493808 | 5.891931429  | 6.414051472 | 5.888678466  | 6.229253229 |
| AGAP5      | 6.451201501 | 5.954120542 | 6.441189669 | 6.22688566  | 6.037361872 | 6.302549994  | 6.114176633  | 6.194932221 | 6.228902604  | 6.22691062  | 6.291379304  | 5.658126522 | 4.86887472   | 5.694712668 | 5.796105291  | 6.238231241 | 5.833838049  | 6.203183682 |
| NUD18      | 5.44117627  | 5.44619506  | 6.22688566  | 6.037361872 | 6.302549994 | 6.114176633  | 6.194932221  | 6.228902604 | 6.22691062   | 6.291379304 | 5.658126522  | 4.86887472  | 5.694712668  | 5.796105291 | 6.238231241  | 5.833838049 | 6.203183682  | 6.197187752 |
| ZNF1       | 5.639631026 | 5.461597308 | 5.461597308 | 5.461597308 | 5.461597308 | 5.461597308  | 5.461597308  | 5.461597308 | 5.461597308  | 5.461597308 | 5.461597308  | 5.461597308 | 5.461597308  | 5.461597308 | 5.461597308  | 5.461597308 | 5.461597308  | 5.461597308 |
| GATL3      | 6.05927999  | 6.694012265 | 6.398092993 | 6.187158945 | 6.230882537 | 6.416484004  | 6.053573176  | 5.985791477 | 6.058988225  | 5.83346258  | 6.688262689  | 7.168526407 | 5.71841453   | 5.75637061  | 6.24461714   | 5.7577762   | 6.170272732  | 6.792135884 |
| SPYLC3     | 5.906931552 | 6.357460949 | 5.899830201 | 5.92228965  | 6.246662102 | 5.667105254  | 5.913081249  | 4.008637337 | 6.171259097  | 6.658840026 | 5.803835929  | 6.068971755 | 6.260591776  | 6.010967825 | 6.429491682  | 6.30779212  | 6.77471831   | 6.574162217 |
| R2SD2      | 6.226551936 | 6.650528982 | 6.898184981 | 6.585439418 | 6.690848334 | 6.078377076  | 6.1716498251 | 6.202367904 | 6.028817312  | 6.560862049 | 6.128385923  | 6.768121869 | 6.393465048  | 6.128385923 | 6.768121869  | 6.393465048 | 6.552124866  | 6.496465162 |
| ZMAT1      | 7.182228028 | 6.234737658 | 5.383480207 | 5.523408773 | 6.529172404 | 5.514233758  | 6.745805106  | 5.908423123 | 6.516582218  | 6.151326427 | 6.108553169  | 5.397407963 | 5.391072797  | 5.501202204 | 6.374114058  | 6.306875518 | 6.574928377  | 5.908990214 |
| SP1        | 6.219578106 | 6.274774792 | 6.34041005  | 6.274774792 | 6.34041005  | 6.274774792  | 6.34041005   | 6.274774792 | 6.34041005   | 6.274774792 | 6.34041005   | 6.274774792 | 6.34041005   | 6.274774792 | 6.34041005   | 6.274774792 | 6.34041005   | 6.274774792 |
| LRN37B     | 5.907536683 | 6.23399173  | 5.868589936 | 5.831935668 | 6.43195668  | 5.908470863  | 5.994317211  | 6.431761627 | 6.00649494   | 6.487505511 | 6.207413537  | 6.777368841 | 5.824639933  | 5.869465162 | 6.314732272  | 6.311980575 | 6.484389429  | 6.022877298 |
| RRP18D     | 5.485514278 | 5.48599266  | 6.449732786 | 5.96138666  | 6.941260033 | 6.768884556  | 6.067959736  | 6.202861968 | 6.446364269  | 6.28823877  | 6.246886323  | 5.779715694 | 5.386779245  | 5.479172667 | 6.69375144   | 6.206806505 | 5.509429508  | 6.322454508 |
| DKH3       | 6.53853723  | 6.765489884 | 6.196831876 | 6.428793295 | 5.725794161 | 6.428793295  | 5.725794161  | 6.428793295 | 5.725794161  | 6.428793295 | 5.725794161  | 6.428793295 | 5.725794161  | 6.428793295 | 5.725794161  | 6.428793295 | 5.725794161  | 6.428793295 |
| KLHD7C     | 6.70219877  | 5.377248985 | 6.008442393 | 6.52299998  | 6.348733792 | 6.629323564  | 6.234023356  | 6.290679513 | 5.998690653  | 6.399877177 | 6.034185817  | 6.714355142 | 5.903336975  | 6.082190795 | 6.216123271  | 6.375648824 | 5.993540005  | 6.098610297 |
| STOX2      | 6.998257772 | 7.862611245 | 5.152894451 | 5.094883022 | 8.0161134   | 6.733770176  | 6.512885223  | 6.211880557 | 6.181175799  | 6.821113169 | 6.13940246   | 5.433242627 | 5.2918708    | 6.210840008 | 6.385894361  | 6.837746966 | 6.217468094  | 5.836375932 |
| AL109923.1 | 5.477555584 | 7.171575799 | 6.358647626 | 5.809982241 | 6.865912862 | 5.489630653  | 6.96141334   | 6.181114759 | 6.782865242  | 6.023682931 | 6.19042964   | 5.433242627 | 5.2918708    | 6.210840008 | 6.385894361  | 6.837746966 | 6.217468094  | 5.836375932 |
| CTBP2      | 6.514411179 | 5.614254009 | 6.144024343 | 5.614254009 | 6.144024343 | 5.614254009  | 6.144024343  | 5.614254009 | 6.144024343  | 5.614254009 | 6.144024343  | 5.614254009 | 6.144024343  | 5.614254009 | 6.144024343  | 5.614254009 | 6.144024343  | 5.614254009 |
| IFI27      | 6.152779815 | 8.099579287 | 4.770157465 | 4.752473481 | 6.538201463 | 7.08064533   | 6.951345428  | 6.063930708 | 6.161125979  | 6.00008768  | 6.241311111  | 6.236554517 | 7.034664247  | 6.947706609 | 7.619314333  | 7.636016123 | 6.613917982  | 6.947206539 |
| CCDC7      | 5.999131197 | 6.48843674  | 6.273438746 | 6.363353544 | 5.41174632  | 4.466249662  | 6.250194913  | 5.811936235 | 6.351142769  | 6.217990338 | 6.02073698   | 6.355647727 | 6.724747322  | 5.360342847 | 6.15841624   | 6.583129941 | 6.179175253  | 6.169943258 |
| FOXO4      | 6.102398941 | 5.409054003 | 5.717624994 | 6.117475999 | 6.456396662 | 5.52776104   | 6.555871028  | 6.489042028 | 6.15115292   | 6.195883657 | 6.216128995  | 6.341791864 | 5.345771956  | 7.023382149 | 6.634737021  | 6.19639747  | 6.250301748  | 6.729921868 |
| ZNF70      | 6.434523258 | 6.943843368 | 6.943843368 | 6.943843368 | 6.943843368 | 6.943843368  | 6.943843368  | 6.943843368 | 6.943843368  | 6.943843368 | 6.943843368  | 6.943843368 | 6.943843368  | 6.943843368 | 6.943843368  | 6.943843368 | 6.943843368  | 6.943843368 |
| PHLAD2     | 5.961102827 | 5.524658145 | 6.114024343 | 6.108658626 | 5.922045636 | 6.14788671   | 6.10288361   | 6.410710583 | 6.06807555   | 6.469112789 | 5.492515715  | 6.70984548  | 5.408161957  | 6.516843675 | 6.179761133  | 6.109790306 | 6.724049829  | 6.228049829 |
| FAM171A1   | 5.097228142 | 5.090415586 | 5.090218123 | 5.07441181  | 6.40443285  | 7.046129032  | 6.679996991  | 6.198939574 | 5.982457947  | 6.460297849 | 6.683977368  | 5.200144893 | 6.179026809  | 5.104068921 | 6.82895536   | 5.729332619 | 6.189335309  | 7.066517816 |
| KIAA1958   | 6.797730307 | 7.266879326 | 5.72136776  | 6.176828839 | 7.303028783 | 7.127276773  | 6.178628839  | 6.57811888  | 5.70749302   | 6.93004602  | 5.963033051  | 6.54984703  | 6.209566208  | 5.737627912 | 6.532108909  | 6.532108909 | 6.532108909  | 6.532108909 |
| PRICKLE3   | 6.386678768 | 6.84689798  | 6.775844692 | 6.19983157  | 5.420525927 | 6.27694901   | 6.40438039   | 6.125039685 | 6.215679988  | 6.446927275 | 6.064618163  | 6.301781526 | 6.57933492   | 6.645642881 | 6.05271619   | 6.113941604 | 6.183826110  | 5.936328297 |
| KCN2A      | 5.627976517 | 6.15106691  | 5.987232395 | 6.15245862  | 6.081381246 | 6.269464981  | 6.012980008  | 6.565788977 | 6.15245862   | 6.012980008 | 6.565788977  | 6.15245862  | 6.012980008  | 6.565788977 | 6.15245862   | 6.012980008 | 6.565788977  | 6.15245862  |
| CDRT4      | 6.342841532 | 5.903461286 | 5.846640493 | 5.916793117 | 6.52746368  | 5.797016149  | 5.928333767  | 6.37135601  | 6.034919692  | 6.273703339 | 6.105911104  | 7.003781799 | 5.720231028  | 6.430241738 | 6.095731338  | 6.285019652 | 6.17732648   | 6.295639866 |
| EXOC6      | 6.159794924 | 6.539540075 | 6.930624646 | 6.159794924 | 6.539540075 | 6.930624646  | 6.159794924  | 6.539540075 | 6.930624646  | 6.159794924 | 6.539540075  | 6.930624646 | 6.159794924  | 6.539540075 | 6.930624646  | 6.159794924 | 6.539540075  | 6.930624646 |
| DIAPH2     | 5.305125711 | 5.38564802  | 7.030110315 | 5.21622663  | 6.971293706 | 7.468470135  | 7.120401157  | 6.144832045 | 6.540564088  | 6.170300110 | 5.25464258   | 5.329977558 | 5.499927838  | 5.143749464 | 6.05716871   | 7.004144559 | 6.216327717  | 6.455720358 |
| LCAT       | 6.143959414 | 6.052454798 | 5.947779592 | 6.143959414 | 6.052454798 | 5.947779592  | 6.143959414  | 6.052454798 | 5.947779592  | 6.143959414 | 6.052454798  | 5.947779592 | 6.143959414  | 6.052454798 | 5.947779592  | 6.143959414 | 6.052454798  | 5.947779592 |
| RASGF1R    | 5.735357059 | 5.495973047 | 5.16369471  | 5.138747056 | 6.169768056 | 6.1611930065 | 7.415028797  | 6.684893986 | 7.763943886  | 6.517387125 | 5.515453517  | 5.797144306 | 5.207664595  | 6.731758054 | 6.743416001  | 7.107661644 | 6.202267822  | 5.660846226 |
| SRGA1P     | 6.133682535 | 6.050764295 | 6.046730216 | 6.133682535 | 6.050764295 | 6.046730216  | 6.133682535  | 6.050764295 | 6.046730216  | 6.133682535 | 6.050764295  | 6.046730216 | 6.133682535  | 6.050764295 | 6.046730216  | 6.133682535 | 6.050764295  | 6.046730216 |
| NAIF1      | 6.310327188 | 7.003426188 | 7.003426188 | 7.003426188 | 7.003426188 | 7.003426188  | 7.003426188  | 7.003426188 | 7.003426188  | 7.003426188 | 7.003426188  | 7.003426188 | 7.003426188  | 7.003426188 | 7.003426188  | 7.003426188 | 7.003426188  | 7.003426188 |
| TRIM6      | 5.822601121 | 5.652637412 | 7.255135774 | 5.658303626 | 6.478230485 | 5.781930557  | 5.99994036   | 6.367784674 | 6.1967784674 | 6.367784674 | 6.1967784674 | 6.367784674 | 6.1967784674 | 6.367784674 | 6.1967784674 | 6.367784674 | 6.1967784674 | 6.367784674 |
| EXOC6      | 6.159794924 | 6.539540075 | 6.930624646 | 6.15979492  |             |              |              |             |              |             |              |             |              |             |              |             |              |             |



|            |             |             |             |              |             |             |              |             |             |             |             |             |             |             |             |             |             |             |
|------------|-------------|-------------|-------------|--------------|-------------|-------------|--------------|-------------|-------------|-------------|-------------|-------------|-------------|-------------|-------------|-------------|-------------|-------------|
| HST2H4B    | 5.82172168  | 6.43388053  | 5.75404053  | 5.572624857  | 5.725380016 | 5.89583435  | 6.342218029  | 6.139924999 | 6.155671736 | 5.875639153 | 6.159282023 | 5.907982616 | 5.859064036 | 6.278532387 | 6.152843475 | 6.202148545 | 6.346235796 | 6.443800863 |
| AMIG0      | 6.678577105 | 5.982079791 | 5.166177014 | 6.116278268  | 6.116278268 | 6.116278268 | 6.116278268  | 6.116278268 | 6.116278268 | 6.116278268 | 6.116278268 | 6.116278268 | 6.116278268 | 6.116278268 | 6.116278268 | 6.116278268 | 6.116278268 | 6.116278268 |
| PRXG3-TAX1 | 6.178749974 | 5.073344741 | 6.162899774 | 6.178749974  | 6.178749974 | 6.178749974 | 6.178749974  | 6.178749974 | 6.178749974 | 6.178749974 | 6.178749974 | 6.178749974 | 6.178749974 | 6.178749974 | 6.178749974 | 6.178749974 | 6.178749974 | 6.178749974 |
| NUF1P1     | 7.293498478 | 6.560349428 | 6.107968735 | 6.095926924  | 6.504126554 | 6.527876337 | 6.733489242  | 5.909461554 | 5.978231305 | 6.118413345 | 6.026393322 | 6.183787488 | 6.951916233 | 5.34738832  | 6.066601299 | 6.214510241 | 6.338151684 | 6.212111001 |
| THEN176A   | 6.93097454  | 6.203264172 | 5.83844827  | 5.812322393  | 5.812322393 | 5.812322393 | 5.812322393  | 5.812322393 | 5.812322393 | 5.812322393 | 5.812322393 | 5.812322393 | 5.812322393 | 5.812322393 | 5.812322393 | 5.812322393 | 5.812322393 | 5.812322393 |
| SLC29A     | 5.627615807 | 6.093155607 | 6.350470857 | 6.350470857  | 6.350470857 | 6.350470857 | 6.350470857  | 6.350470857 | 6.350470857 | 6.350470857 | 6.350470857 | 6.350470857 | 6.350470857 | 6.350470857 | 6.350470857 | 6.350470857 | 6.350470857 | 6.350470857 |
| DOT1L      | 5.643945652 | 6.588207085 | 5.75319518  | 5.668251887  | 6.45697683  | 6.48440115  | 6.22281498   | 6.66660386  | 6.247164148 | 6.389253646 | 6.061741097 | 6.151920264 | 6.053131119 | 5.823418312 | 6.466788918 | 5.874545757 | 6.379540569 | 6.788954194 |
| WNT4       | 5.53206762  | 5.176498995 | 6.688129752 | 5.526774479  | 6.245709124 | 6.530157378 | 6.28392192   | 6.70753264  | 6.423016992 | 6.111265474 | 6.69304977  | 6.076768874 | 6.859288591 | 5.459676531 | 6.11726588  | 5.940456152 | 5.695117652 | 5.986692223 |
| SUT1       | 5.923758032 | 6.641780299 | 5.733974659 | 5.999978634  | 6.259952133 | 6.596998392 | 6.623121421  | 6.139465012 | 5.771884334 | 6.374796511 | 6.033504767 | 6.856709356 | 5.734695694 | 6.036000724 | 6.050090994 | 6.140465517 | 6.335579796 | 6.24069289  |
| ZNF764     | 5.689107495 | 6.044228285 | 5.574531873 | 5.629063115  | 5.765268511 | 6.456303255 | 6.46631478   | 6.045801949 | 5.850016969 | 6.230196987 | 6.262868032 | 6.357566682 | 5.781106888 | 6.808815074 | 6.157260047 | 6.11741898  | 6.104166036 | 6.401166036 |
| B3GAT2     | 5.628868958 | 6.081778695 | 6.081778695 | 5.490062797  | 5.532785827 | 6.307882744 | 6.091822746  | 6.205236585 | 5.703244412 | 6.265377993 | 5.994299674 | 6.179835757 | 6.028816456 | 5.733579028 | 6.490560076 | 5.901275908 | 5.567411067 | 6.347110667 |
| NCA1B1     | 6.086878659 | 6.49867994  | 6.49867994  | 5.864221443  | 6.188972128 | 5.28777383  | 5.631800696  | 6.170926829 | 6.09585149  | 6.26612744  | 5.984510706 | 5.611749509 | 6.265013856 | 6.251590016 | 6.13990875  | 5.967309898 | 5.56017974  | 5.416485265 |
| NR1B3      | 6.26870534  | 6.363140191 | 6.178765099 | 6.201770355  | 6.109508414 | 6.386989898 | 5.872710322  | 6.132428485 | 6.0506489   | 6.230728579 | 5.340264646 | 5.69749541  | 5.904463561 | 6.134245502 | 6.099272515 | 6.701389597 |             |             |
| MOC51      | 6.881926153 | 5.311364959 | 5.311286829 | 6.219655555  | 6.180105091 | 6.835252944 | 5.469973858  | 6.46893008  | 6.027899624 | 6.045725407 | 6.25548725  | 6.443584842 | 5.512402557 | 6.03310358  | 6.25691192  | 5.765641158 | 5.65195958  | 6.575180988 |
| TMEM237    | 6.38419976  | 6.754753718 | 5.530935489 | 6.451086779  | 5.493708958 | 5.81826529  | 5.22562794   | 6.570793283 | 6.104554083 | 6.386808144 | 6.754656897 | 6.731398365 | 6.963453209 | 5.27790073  | 5.812037632 | 6.159024107 | 5.619039028 | 6.87018715  |
| TRMT5      | 5.51514384  | 5.483236079 | 5.891642261 | 6.875131252  | 6.454434437 | 6.556032776 | 5.908688793  | 6.047764778 | 6.312855566 | 6.255084793 | 6.623943547 | 5.687044983 | 7.468890741 | 5.709401031 | 5.893961672 | 6.110357414 | 6.73539486  | 6.15297249  |
| STXBPA     | 5.51863199  | 5.613998581 | 5.613998581 | 5.538290095  | 5.247231217 | 5.353275959 | 5.790829607  | 7.240729139 | 7.2382372   | 7.007305629 | 6.546996819 | 5.69718673  | 6.455556402 | 6.661213907 | 6.101813898 | 6.947508479 | 6.599628336 |             |
| SNURF      | 5.640801864 | 6.223030309 | 6.693144018 | 6.082400022  | 6.420343259 | 6.10809575  | 6.296691998  | 5.827705322 | 6.039063466 | 6.074676207 | 5.882148    | 6.208055122 | 5.842128217 | 5.823159299 | 6.175494829 | 6.166204186 | 6.299982149 | 6.52181546  |
| DHFR2      | 5.650971465 | 6.047043178 | 6.309850525 | 6.047043178  | 6.289127869 | 5.643239479 | 5.643239479  | 5.643239479 | 5.643239479 | 5.643239479 | 5.643239479 | 5.643239479 | 5.643239479 | 5.643239479 | 5.643239479 | 5.643239479 | 5.643239479 | 5.643239479 |
| IMP2       | 6.165227574 | 5.37413804  | 6.066076029 | 6.165227574  | 6.165227574 | 6.165227574 | 6.165227574  | 6.165227574 | 6.165227574 | 6.165227574 | 6.165227574 | 6.165227574 | 6.165227574 | 6.165227574 | 6.165227574 | 6.165227574 | 6.165227574 | 6.165227574 |
| FAM220A    | 6.463869538 | 6.130549928 | 5.564059073 | 6.049625254  | 5.562958979 | 6.174841351 | 6.388017691  | 6.008591974 | 6.070608996 | 6.130345977 | 6.218992564 | 5.854720215 | 6.930250486 | 6.51553061  | 5.898780023 | 5.933313305 | 6.269007204 | 5.649784222 |
| LYPD5B     | 6.064084977 | 7.234903903 | 6.461564036 | 6.623761399  | 5.973265055 | 5.319094411 | 6.791979867  | 5.88731904  | 6.104346249 | 6.382327742 | 6.218375215 | 6.104346249 | 6.382327742 | 6.218375215 | 6.104346249 | 6.382327742 | 6.218375215 | 6.104346249 |
| NTSE       | 5.120824135 | 6.766219737 | 6.752416304 | 6.015016828  | 5.107596351 | 6.334961849 | 6.574345882  | 6.080341977 | 7.270207576 | 5.907522522 | 6.94915288  | 5.97734151  | 5.116925115 | 5.128316292 | 4.95907821  | 6.430367136 | 6.179506414 | 6.74748247  |
| PPP1R2P9   | 5.105810017 | 6.189674248 | 6.124471901 | 6.189674248  | 5.937551695 | 6.729997958 | 6.729997958  | 6.368489656 | 6.926105085 | 6.829812053 | 6.74651868  | 5.102351512 | 5.102540483 | 5.112105207 | 6.270958489 | 6.864446905 | 6.135206669 | 5.677090291 |
| ZNF616     | 6.851454791 | 6.78885138  | 6.851454791 | 6.955457166  | 5.34449359  | 5.379135935 | 5.40629044   | 6.340154627 | 6.225531532 | 6.053706506 | 5.994154235 | 5.73366574  | 5.57822842  | 6.245156401 | 6.347452649 | 6.20345192  | 5.802435904 | 6.78230000  |
| ZNF619     | 7.014137987 | 7.064072804 | 6.85652863  | 6.301569296  | 5.352234252 | 5.334959865 | 6.124107047  | 6.239545056 | 6.838389712 | 6.136360919 | 5.377099756 | 7.451262668 | 5.423112167 | 6.155257549 | 6.404396537 | 6.00452377  | 6.782470206 |             |
| PZDRNA     | 7.093916891 | 6.187529415 | 6.82083898  | 6.1011726117 | 6.960687268 | 5.039917047 | 5.0391392615 | 6.332250935 | 6.739300222 | 5.842288276 | 6.172885967 | 7.783925882 | 5.433536995 | 5.045730791 | 6.546871128 | 6.084749396 | 5.313503116 | 5.258842994 |
| HPY2       | 6.918548799 | 6.019643799 | 6.019643799 | 6.019643799  | 6.019643799 | 6.019643799 | 6.019643799  | 6.019643799 | 6.019643799 | 6.019643799 | 6.019643799 | 6.019643799 | 6.019643799 | 6.019643799 | 6.019643799 | 6.019643799 | 6.019643799 | 6.019643799 |
| KCTD6      | 6.208791608 | 6.044786333 | 5.330008885 | 6.114783633  | 5.898672698 | 6.208795751 | 5.9211001167 | 6.129551301 | 6.129551301 | 6.129551301 | 6.129551301 | 6.129551301 | 6.129551301 | 6.129551301 | 6.129551301 | 6.129551301 | 6.129551301 | 6.129551301 |
| NUDT6      | 5.11654807  | 5.116758316 | 6.577090983 | 5.100128436  | 6.395933774 | 6.968852348 | 5.157993482  | 5.932469557 | 5.722819442 | 6.290379556 | 6.364289378 | 5.085591104 | 7.060255958 | 7.319647829 | 6.336605075 | 6.153297925 | 6.097744264 | 6.584795919 |
| ACO2592.1  | 6.490455656 | 5.586064774 | 6.151174668 | 6.326751024  | 6.293482099 | 6.107274492 | 6.107274492  | 6.073945056 | 6.108631444 | 6.142465577 | 6.280994623 | 5.727531605 | 6.51944073  | 6.606452785 | 5.99180736  | 6.046362003 | 6.036926172 | 5.608762921 |
| ADAM15     | 6.264506152 | 6.470398918 | 6.209914680 | 6.332150869  | 5.857230176 | 6.252014829 | 6.680913754  | 6.423202739 | 5.83170662  | 6.001840904 | 5.856454678 | 6.300795893 | 5.432451374 | 5.674668575 | 6.38438924  | 6.077157958 | 6.172435339 | 6.04127453  |
| SCL19A5    | 5.336135854 | 6.992572268 | 7.103475633 | 6.193150523  | 5.78341729  | 7.395814671 | 6.396229044  | 5.991796842 | 6.194438281 | 5.932809974 | 6.234967116 | 5.286927053 | 5.950145787 | 5.473493583 | 5.41627869  | 6.059688659 | 6.189693099 | 6.683755484 |
| PHACR2     | 5.229922248 | 5.176698097 | 5.643661392 | 6.1010648179 | 5.147073211 | 6.117710386 | 5.208860142  | 7.042253377 | 6.156306316 | 6.345868627 | 5.983399629 | 5.221418531 | 5.390297848 | 6.67271088  | 6.702296877 | 5.676930267 | 6.122275168 | 6.991471479 |
| DNPL2      | 6.402937987 | 6.100756962 | 5.70972096  | 6.402937987  | 6.402937987 | 6.402937987 | 6.402937987  | 6.402937987 | 6.402937987 | 6.402937987 | 6.402937987 | 6.402937987 | 6.402937987 | 6.402937987 | 6.402937987 | 6.402937987 | 6.402937987 | 6.402937987 |
| AGAP1      | 5.72401866  | 6.437610182 | 6.437610182 | 6.437610182  | 6.437610182 | 6.437610182 | 6.437610182  | 6.437610182 | 6.437610182 | 6.437610182 | 6.437610182 | 6.437610182 | 6.437610182 | 6.437610182 | 6.437610182 | 6.437610182 | 6.437610182 | 6.437610182 |
| FAM185A    | 6.22287647  | 6.198508956 | 6.550540039 | 5.839609905  | 5.847393255 | 6.458903603 | 6.194021417  | 6.105015296 | 5.925044418 | 6.167174057 | 6.833248505 | 5.839264276 | 5.54007575  | 5.393930889 | 5.871951405 | 6.135705275 | 6.148293723 | 6.240005556 |
| LRP2B      | 6.451291304 | 6.184043703 | 6.213399924 | 6.451291304  | 6.184043703 | 6.213399924 | 6.451291304  | 6.451291304 | 6.451291304 | 6.451291304 | 6.451291304 | 6.451291304 | 6.451291304 | 6.451291304 | 6.451291304 | 6.451291304 | 6.451291304 | 6.451291304 |
| MYL5       | 5.932664949 | 5.552469149 | 6.614131204 | 6.363734773  | 6.048944026 | 6.774053932 | 5.724363042  | 6.101419069 | 6.374913015 | 6.138049796 | 5.949990398 | 6.400199455 | 6.517707304 | 6.478798001 | 6.008416939 | 6.076207074 | 6.161476487 | 6.058418084 |
| DGCR8      | 5.78346852  | 5.523218683 | 6.025298401 | 5.975058269  | 6.689934563 | 6.589095926 | 6.589095926  | 6.342703409 | 6.589095926 | 6.342703409 | 6.589095926 | 6.342703409 | 6.589095926 | 6.342703409 | 6.589095926 | 6.342703409 | 6.589095926 | 6.342703409 |
| KIF27      | 5.72288891  | 5.615707684 | 6.025690022 | 6.398908009  | 6.016589428 | 5.843568618 | 6.074590707  | 6.26827384  | 6.075400782 | 6.30039571  | 6.156341143 | 6.270074782 | 6.855971043 | 5.687466386 | 5.840069207 | 6.22242088  | 6.17569524  | 6.17005569  |
| PFKP       | 5.254860413 | 5.710306315 | 6.198024628 | 5.254860413  | 5.710306315 | 6.198024628 | 5.710306315  | 5.852080153 | 6.626598937 |             |             |             |             |             |             |             |             |             |

|            |             |             |             |             |             |              |             |              |             |             |             |             |             |             |             |             |             |              |
|------------|-------------|-------------|-------------|-------------|-------------|--------------|-------------|--------------|-------------|-------------|-------------|-------------|-------------|-------------|-------------|-------------|-------------|--------------|
| DUP7       | 5.515415837 | 6.731799535 | 6.67338445  | 5.769894567 | 5.71841783  | 6.117394623  | 5.766991632 | 6.18163566   | 6.48932557  | 6.055574078 | 5.92184553  | 6.23828046  | 6.103496327 | 6.24244019  | 5.887449459 | 6.127637747 | 5.915907775 | 5.71309378   |
| LYAR       | 6.681314564 | 6.568421034 | 6.89413735  | 6.89413735  | 7.1729911   | 5.725885427  | 6.492060478 | 6.249123278  | 6.131091016 | 6.069840295 | 5.962192072 | 6.013800717 | 6.672473088 | 5.290763609 | 5.76667367  | 6.08922834  | 5.874490848 | 5.800595528  |
| WDR53      | 6.045495669 | 6.041266453 | 5.526923171 | 5.301113834 | 5.970341911 | 6.323512335  | 6.219315934 | 6.371328281  | 6.18333008  | 6.335166582 | 6.29386423  | 5.310632009 | 5.861296956 | 6.113492929 | 6.204433504 | 5.947789794 |             |              |
| TECA3      | 5.220497421 | 6.136441299 | 6.512498791 | 5.674281677 | 6.492852092 | 5.303034003  | 6.134522274 | 6.20466305   | 6.418250025 | 5.899253188 | 6.37420214  | 6.33679558  | 5.12589356  | 5.462499741 | 5.739274547 | 6.023568374 | 5.96579306  | 6.275008793  |
| RIIP2      | 5.565651465 | 5.877037627 | 5.574985399 | 6.383271000 | 5.798325629 | 5.794352629  | 5.794352629 | 6.192952844  | 6.21175712  | 6.170180485 | 6.20235315  | 5.710810465 | 6.049979678 | 6.231088309 | 5.630991148 | 6.147217444 | 6.210883809 | 6.172797444  |
| TA13       | 5.284271663 | 5.468423812 | 5.628474452 | 5.628474452 | 5.287496486 | 5.719992412  | 6.357649441 | 6.357649441  | 5.702871131 | 5.872067871 | 6.28282613  | 6.251923028 | 5.342091763 | 5.928673579 | 5.81670523  | 5.245717794 | 6.1218132   | 6.187078557  |
| CENP       | 5.615522862 | 5.633960672 | 6.142157984 | 5.504244765 | 6.232066623 | 6.74020729   | 5.552806764 | 6.130698945  | 5.829218373 | 6.025157855 | 5.97817696  | 5.921685754 | 6.600690723 | 6.759055116 | 6.260316007 | 6.14253673  | 5.945967665 | 6.133857207  |
| ZN45       | 6.065284786 | 5.442387678 | 5.682384078 | 5.497304875 | 5.18959159  | 5.182264239  | 5.539074472 | 6.488983608  | 6.240688181 | 6.0520339   | 5.116266318 | 5.645548723 | 7.355977995 | 6.695042975 | 6.500156928 | 6.457035553 | 6.08827788  | 6.26718444   |
| RFN144A    | 6.245706701 | 6.107664852 | 5.91004849  | 5.386639308 | 5.386639309 | 5.493134913  | 6.73952528  | 5.942794687  | 6.498818386 | 6.671966847 | 6.533832455 | 5.396983456 | 5.286276266 | 6.259999613 | 5.914293608 | 7.015131214 | 6.043693299 | 6.165190164  |
| OTU47B     | 5.94490595  | 6.060621096 | 6.090634904 | 6.090634904 | 6.060621096 | 6.368323215  | 6.356676471 | 6.14411792   | 5.912278098 | 6.314111479 | 6.275858437 | 7.722049993 | 5.865367812 | 5.729574348 | 6.620561446 | 6.351208377 | 6.66716097  | 5.947716097  |
| ILDR1      | 5.433804895 | 5.579434507 | 6.471822489 | 5.84695521  | 6.256309396 | 6.797394804  | 5.43386621  | 6.170364307  | 6.065899161 | 6.075099916 | 5.717842778 | 6.920268649 | 5.493109282 | 5.583059632 | 6.07937856  | 6.189024495 | 5.956149245 | 6.1306320275 |
| RNF215     | 7.055367137 | 5.423517284 | 5.802845173 | 6.033348718 | 5.295293205 | 5.2948975196 | 5.700533222 | 6.601491847  | 6.183234415 | 6.675803962 | 6.008452879 | 5.712663187 | 5.874792689 | 6.108346011 | 6.214369663 | 6.678274367 | 6.945773937 | 6.166655488  |
| CD14A      | 5.060697668 | 5.060697668 | 5.065113315 | 5.547540686 | 6.146469608 | 5.50918257   | 6.072389056 | 6.064365569  | 6.278784514 | 5.08140041  | 5.058279406 | 5.065325555 | 6.269659659 | 6.263711994 | 6.069187213 | 5.679150717 |             |              |
| MER2       | 6.078785016 | 5.770659649 | 6.430176241 | 5.833306259 | 6.078242957 | 6.013008152  | 6.128510835 | 5.886331172  | 6.179319195 | 5.098966605 | 6.03327483  | 6.073983913 | 5.547909165 | 6.648345604 | 5.811204567 | 6.008310493 | 6.075441058 | 6.073669599  |
| INF1       | 5.923972008 | 6.383115949 | 6.862126705 | 5.864104254 | 6.145253855 | 6.00967845   | 6.414033749 | 6.0502961785 | 6.314517931 | 6.059788378 | 6.236266494 | 6.384867573 | 6.012004894 | 5.613838817 | 5.995460426 | 5.83029236  | 6.03798706  | 6.254745024  |
| TRNRSF10D  | 5.246034586 | 6.683616344 | 5.178291334 | 7.599957795 | 5.213096843 | 5.210392629  | 5.300979278 | 6.53271853   | 6.04004434  | 5.902880974 | 6.403231105 | 5.717116387 | 5.017554891 | 7.962476404 | 6.985272415 | 6.600798925 | 6.095777947 | 6.347078718  |
| ILL1RA     | 5.401160034 | 5.269030134 | 5.146302083 | 5.132797085 | 5.90592573  | 6.163582845  | 6.778841623 | 6.269992677  | 5.530955147 | 6.0646689   | 6.42205484  | 6.218163224 | 6.259578828 | 5.149427569 | 6.05626815  | 5.708632583 | 6.128247783 | 6.082912566  |
| HIST13H3   | 6.270400404 | 5.147841422 | 5.165711651 | 5.171847252 | 5.624102366 | 5.817624023  | 6.309843649 | 5.593976573  | 5.891220196 | 6.234217163 | 6.28685211  | 6.685062203 | 6.259447207 | 6.384091147 | 5.972187306 | 6.166758131 | 6.36505471  |              |
| ZN615      | 6.234707673 | 6.462458617 | 6.180350268 | 5.875281552 | 6.152754269 | 5.841664421  | 5.622059274 | 6.199338734  | 5.67314256  | 5.150363538 | 5.672123366 | 5.473261841 | 5.749853559 | 6.05959341  | 6.078313072 | 6.100226117 | 6.262365825 | 5.912499566  |
| NOP3       | 6.471639414 | 5.699090672 | 5.886477991 | 6.181815545 | 6.140042747 | 5.734084107  | 5.828420119 | 6.233830051  | 6.058217113 | 6.177191289 | 6.67979654  | 5.738888574 | 5.378631101 | 5.401636329 | 5.152999823 | 5.886259929 | 6.216666979 | 6.341748438  |
| LE13       | 6.932028958 | 5.995927398 | 5.688146572 | 5.729942095 | 5.320800897 | 6.432235653  | 6.226375261 | 6.119427745  | 6.169270913 | 5.609874726 | 6.05381352  | 5.324097605 | 6.195738745 | 6.103795485 | 6.379688695 | 5.955503845 | 5.893595879 | 6.489336944  |
| KMTD2      | 7.18554407  | 6.045373839 | 6.013829669 | 5.654487263 | 6.24633498  | 6.119615862  | 6.277639407 | 6.18148673   | 6.838900152 | 5.63958577  | 5.463055538 | 8.36540248  | 5.820554391 | 6.48685881  | 6.146458167 | 5.856868914 | 6.153039424 |              |
| PLEKHM3    | 5.742699099 | 6.58240531  | 5.559505073 | 5.757626241 | 5.55920481  | 6.679419005  | 5.435836483 | 6.327204868  | 6.182299438 | 6.32542485  | 6.236756651 | 6.864636639 | 6.025680022 | 5.52912815  | 6.343772053 | 5.914008657 | 6.10774637  | 5.99273437   |
| LINC01125  | 5.835458668 | 6.584242872 | 6.554738598 | 5.797510247 | 5.620716147 | 5.701380665  | 5.84251092  | 5.520765782  | 6.185053276 | 6.610682449 | 6.065977509 | 5.58826062  | 6.010063737 | 6.407808602 | 7.033058284 | 6.341503673 | 6.66183012  | 6.129705051  |
| SPRY1      | 6.480620287 | 5.788797415 | 5.714822226 | 5.833677904 | 5.248012344 | 6.078684174  | 6.884426203 | 6.141040218  | 6.204273971 | 5.66315488  | 6.310428836 | 5.743494785 | 5.260570497 | 6.53011995  | 6.05230482  | 5.804643602 | 6.282498348 | 6.49939548   |
| CCDC134    | 6.237018454 | 5.905535315 | 5.900535068 | 6.114505011 | 6.048966666 | 5.316314492  | 6.356175767 | 6.311920336  | 6.036308093 | 6.365251827 | 6.093295901 | 6.247108038 | 6.675044186 | 6.188379698 | 5.981437443 | 5.993808245 | 6.156523521 | 5.87513333   |
| DDI4       | 5.545435956 | 5.340849229 | 5.995702372 | 5.778821973 | 6.664832158 | 5.232897651  | 6.102906287 | 6.544176249  | 6.031493445 | 6.184420511 | 6.096110805 | 7.126868585 | 5.991114381 | 5.319008956 | 6.76869327  | 6.335238922 | 5.988987764 | 6.109705049  |
| RIIP2      | 5.931605185 | 6.109179174 | 6.109179174 | 6.109179174 | 6.109179174 | 6.109179174  | 6.109179174 | 6.109179174  | 6.109179174 | 6.109179174 | 6.109179174 | 6.109179174 | 6.109179174 | 6.109179174 | 6.109179174 | 6.109179174 | 6.109179174 | 6.109179174  |
| EC2        | 5.95575842  | 5.773435956 | 5.494286069 | 6.784712539 | 6.384157208 | 6.086517474  | 6.103795613 | 6.10129249   | 6.080020023 | 6.15175259  | 6.087350621 | 6.041462935 | 5.914299258 | 5.806421619 | 5.92792828  | 5.812781326 | 5.946258709 | 6.23876074   |
| FZD5       | 6.335167534 | 5.897874939 | 5.731923757 | 5.957955521 | 5.7047794   | 5.384722754  | 5.084102283 | 6.436590796  | 6.570926263 | 5.819730507 | 6.28664891  | 5.333294519 | 6.421846532 | 5.901020416 | 7.052490098 | 6.385220176 | 6.123435331 | 7.06027297   |
| AC00719.2A | 6.167774366 | 6.76265788  | 5.856499575 | 6.19699999  | 5.856789975 | 6.128436785  | 6.142124654 | 5.908625406  | 6.142124654 | 5.908625406 | 6.071022664 | 6.05962724  | 5.828733636 | 5.700752776 | 5.906052516 | 6.193821348 | 6.628970404 | 6.198077065  |
| SWSA1      | 6.770010515 | 6.066277354 | 6.651427929 | 6.052444983 | 6.132156752 | 6.069286474  | 6.069286474 | 6.010326644  | 6.05962724  | 5.828733636 | 5.700752776 | 5.906052516 | 6.193821348 | 6.628970404 | 6.198077065 | 5.965138352 | 5.915081804 | 6.068544843  |
| RAPGEF4    | 7.211238652 | 5.262656938 | 5.919268385 | 5.919268385 | 5.919268385 | 5.697660113  | 6.128061009 | 6.163348683  | 6.865505566 | 6.36141635  | 5.794238823 | 5.591039171 | 5.208710245 | 6.67751414  | 6.607944203 | 7.039629572 | 5.658455723 | 6.196271188  |
| RIKMLA     | 7.025757539 | 6.31727539  | 6.151245585 | 6.847647753 | 5.17001246  | 6.57717047   | 5.167850315 | 6.470170198  | 5.52246684  | 5.550294348 | 5.157929319 | 6.676219169 | 5.742093666 | 5.19027572  | 6.163641039 | 6.148306131 | 5.499612231 | 5.962126683  |
| DUSP18     | 5.931605185 | 5.765769979 | 6.653651802 | 6.15218302  | 7.896767629 | 6.68021267   | 6.68021267  | 6.046320711  | 6.063339887 | 6.071599868 | 5.965290456 | 5.897778358 | 5.552826278 | 6.623803584 | 6.304789959 | 5.8714511   | 6.252383808 | 6.047823783  |
| LE13       | 6.627635019 | 5.2666819   | 5.720265495 | 5.720265495 | 5.720265495 | 5.720265495  | 5.720265495 | 5.720265495  | 5.720265495 | 5.720265495 | 5.720265495 | 5.720265495 | 5.720265495 | 5.720265495 | 5.720265495 | 5.720265495 | 5.720265495 | 6.766448634  |
| LYTS-CD302 | 6.644134661 | 5.58669286  | 6.444124836 | 5.69225664  | 5.930923227 | 5.783486067  | 6.622565229 | 6.561981436  | 6.167240197 | 6.015394062 | 6.064471034 | 5.607796975 | 6.387934161 | 6.015222343 | 6.36010198  | 5.979248673 | 6.026926535 | 5.988514015  |
| Clorf126   | 6.173250055 | 6.587349778 | 5.373272397 | 6.173250055 | 6.587349778 | 5.373272397  | 6.173250055 | 6.587349778  | 5.373272397 | 6.173250055 | 6.587349778 | 5.373272397 | 6.173250055 | 6.587349778 | 5.373272397 | 6.173250055 | 6.587349778 | 5.373272397  |
| ZN35       | 6.195327958 | 5.16789285  | 6.207418451 | 5.160100305 | 5.165324823 | 6.286102694  | 6.13840679  | 6.11995372   | 5.867394942 | 5.802216312 | 6.093709453 | 6.192853034 | 5.164947899 | 6.398975266 | 6.126359034 | 6.626282004 | 6.012452036 | 5.763500099  |
| DSP        | 7.364774883 | 4.497319429 | 5.729270783 | 4.462502025 | 4.462502025 | 4.505924878  | 5.588366926 | 5.522792922  | 5.991135889 | 6.113962271 | 6.266082966 | 5.580316525 | 4.489567241 | 4.52130021  | 8.041640508 | 4.434512704 | 6.24785592  | 9.747778929  |
| HE56       | 5.266924331 | 5.356624331 | 6.569467106 | 6.39467106  | 6.203886499 | 5.863871506  | 6.004648252 | 6.262497413  | 5.93170737  | 6.138699083 | 6.02158929  | 5.689128421 | 5.269219502 | 5.992374193 | 6.2678047   | 5.651812253 | 6.166174124 | 6.166174124  |
| DG52       | 5.780518421 | 6.569589388 | 5.967751387 | 6.055742963 | 6.28867688  | 6.071694357  | 6.546548582 | 5.986370103  | 6.032871774 | 5.872413555 |             |             |             |             |             |             |             |              |

|           |             |             |             |             |             |              |             |             |             |             |             |             |             |              |             |             |             |              |
|-----------|-------------|-------------|-------------|-------------|-------------|--------------|-------------|-------------|-------------|-------------|-------------|-------------|-------------|--------------|-------------|-------------|-------------|--------------|
| FES       | 6.712184584 | 6.786203115 | 6.039967726 | 5.170530669 | 6.581445077 | 5.472302186  | 5.185135729 | 5.898664666 | 6.051286011 | 5.936347419 | 6.155913944 | 6.546982825 | 6.490929871 | 5.189378583  | 5.625063766 | 5.428623024 | 5.994364458 | 6.29184449   |
| RAB3B     | 5.741308125 | 5.6499978   | 6.210200132 | 6.035899371 | 6.62993497  | 6.665160938  | 5.955242881 | 6.424531604 | 6.060918584 | 6.173750011 | 6.358726473 | 5.725884214 | 6.976908012 | 6.009096401  | 6.408492944 | 5.747830414 | 6.032683669 | 6.037790122  |
| MAP3K     | 6.214751578 | 6.173137883 | 6.034610953 | 5.809667049 | 6.608972081 | 6.626512052  | 6.223826444 | 6.015379556 | 5.917375058 | 6.051696566 | 6.409475926 | 5.85846975  | 6.448744607 | 5.883806903  | 5.843095981 | 5.775502878 | 5.97230686  | 6.153273708  |
| CTH7orf6  | 6.004041291 | 5.839759784 | 5.520369449 | 5.914526224 | 6.143293197 | 5.951379625  | 5.857338993 | 6.131764053 | 6.045534446 | 5.913936664 | 5.98944615  | 6.060017769 | 5.21817606  | 5.939569152  | 6.030573357 | 6.053652028 | 6.215153672 | 7.321275461  |
| GTA1      | 7.195495175 | 6.899789171 | 6.829270757 | 6.489978181 | 5.28118262  | 5.997328374  | 5.97880947  | 5.906644332 | 5.908644332 | 5.919487932 | 5.919487932 | 6.756799808 | 5.361205838 | 6.204423295  | 6.009581127 | 6.200496284 | 6.302096511 | 6.200496284  |
| GDPA1     | 6.25028847  | 5.293258945 | 5.293258945 | 6.17928453  | 6.17928453  | 6.263676056  | 5.536640047 | 6.263676056 | 6.116405346 | 6.116405346 | 6.116405346 | 6.116405346 | 6.116405346 | 6.265013051  | 6.187894156 | 7.95627222  | 6.281155672 | 5.94285251   |
| GRIN2D    | 6.117904273 | 6.586743009 | 5.944202022 | 5.902435453 | 6.134389943 | 6.109679028  | 5.813700106 | 5.774120482 | 5.90618273  | 6.032498165 | 5.703845464 | 6.196073552 | 5.689214941 | 6.522935937  | 6.148320113 | 6.26473158  | 6.974394318 | 5.514686557  |
| KIAA1161  | 6.173512079 | 6.6260777   | 5.726571239 | 6.197168463 | 5.747566855 | 5.719340467  | 6.690986211 | 6.214903595 | 5.928651973 | 6.414691699 | 5.926506556 | 5.498232513 | 5.719483633 | 6.071851212  | 7.680619827 | 6.354464963 | 6.35885737  | 5.684990966  |
| SH3BP1    | 5.949052077 | 6.165977215 | 6.664252071 | 6.503678636 | 6.855018791 | 6.1361284    | 5.957189754 | 5.855709471 | 5.944086405 | 5.868794076 | 5.939036408 | 6.535363526 | 5.914825544 | 7.122384861  | 6.108551339 | 6.059022995 | 6.029501533 | 6.748934842  |
| RP11-31D1 | 6.048420844 | 6.695785286 | 6.729155273 | 6.616535004 | 6.524550074 | 6.724954403  | 5.641449961 | 5.809713408 | 5.613571504 | 5.624550074 | 5.765791219 | 6.745369091 | 6.33837873  | 5.776129587  | 5.730126349 | 5.900718378 | 5.900718378 | 6.005624648  |
| LYG5B     | 6.080536785 | 6.07710329  | 5.881817114 | 6.58685229  | 6.098730510 | 5.875541006  | 5.942929935 | 6.235948416 | 5.685692616 | 5.685692616 | 6.011880655 | 5.900828011 | 6.049412543 | 5.962805951  | 6.148470284 | 6.007868111 | 6.025072544 | 5.910816287  |
| GAN       | 5.596476345 | 6.642595093 | 6.113611295 | 5.61708575  | 5.612095646 | 5.615143437  | 5.645902814 | 6.229418148 | 6.113730108 | 6.135011536 | 6.001722944 | 6.088934661 | 6.014291185 | 5.655262114  | 6.184852618 | 5.708429238 | 6.213809251 | 6.440575296  |
| RFP5      | 6.967860294 | 7.05732247  | 6.640097872 | 6.195608708 | 6.195608708 | 6.195608708  | 6.195608708 | 6.195608708 | 6.195608708 | 6.195608708 | 6.195608708 | 6.195608708 | 6.195608708 | 6.195608708  | 6.195608708 | 6.195608708 | 6.195608708 | 6.195608708  |
| HMGNS     | 6.55081438  | 6.042116629 | 6.416625952 | 5.27943527  | 6.22996072  | 6.106603407  | 5.910005127 | 5.798790999 | 5.374074281 | 5.731050722 | 5.91715555  | 6.429249597 | 6.431235476 | 6.118482971  | 5.919522541 | 6.835734339 | 6.538598301 | 6.178167142  |
| SEPN1     | 6.387990409 | 6.541096633 | 6.20476163  | 6.838747843 | 6.036710793 | 6.096514827  | 6.34472337  | 6.07586742  | 5.98866742  | 6.07586742  | 6.16233414  | 5.975156638 | 6.68884295  | 5.755551718  | 5.943002079 | 5.783060047 | 6.74378873  | 5.77777503   |
| TP53B1    | 5.464785391 | 5.511345679 | 5.114275835 | 6.544192997 | 5.98471076  | 5.119397748  | 6.3642747   | 6.815661315 | 6.137479961 | 6.054002048 | 6.603051363 | 6.259538655 | 5.116268953 | 5.222768428  | 6.082725934 | 6.869655163 | 6.094265376 | 6.663206256  |
| CKTD21    | 6.058946619 | 6.603400372 | 5.918250583 | 5.727267279 | 5.470670484 | 5.7107804618 | 5.31527868  | 6.29445707  | 6.113990091 | 5.936231495 | 6.012319147 | 5.321390081 | 6.764415835 | 5.749971947  | 6.440688012 | 6.231469702 | 5.993999784 | 6.184607976  |
| PKMAR1    | 6.331418216 | 6.989098984 | 5.837260471 | 5.89721672  | 6.082142418 | 6.128475643  | 6.466384071 | 5.873452861 | 6.248058753 | 6.285806781 | 5.94627139  | 6.349573999 | 5.628393139 | 5.350376347  | 5.990872783 | 5.970418617 | 5.90102696  | 6.020033354  |
| C3orf70   | 5.402756979 | 7.289603977 | 6.344462665 | 7.015628373 | 5.445925684 | 6.990130682  | 7.153726337 | 5.450235814 | 5.610575828 | 6.754139585 | 5.59902805  | 5.425291033 | 6.337744713 | 6.801025039  | 5.59639731  | 5.390410123 | 6.828466597 | 6.2944049174 |
| POLD3     | 6.222782749 | 6.382769082 | 5.931927811 | 6.190507426 | 6.209254858 | 6.816652949  | 6.236560889 | 5.82016812  | 6.455654495 | 5.618061734 | 5.781617451 | 5.234386108 | 6.262842683 | 5.240179978  | 5.84935454  | 6.076138865 | 6.076138865 | 6.20219114   |
| ODG12     | 6.585264881 | 7.322157003 | 5.147107003 | 6.719169405 | 6.401124872 | 5.302757666  | 5.400448302 | 6.351525083 | 5.940018513 | 6.218971257 | 6.385976038 | 6.412143467 | 5.304593292 | 5.288911708  | 5.928016091 | 5.425403632 | 5.881072683 | 6.065010199  |
| ZNF71     | 6.652151678 | 5.50996760  | 7.811605025 | 7.002363365 | 5.089355559 | 6.187959022  | 5.200973754 | 5.124145185 | 6.004586142 | 6.004586142 | 5.152414518 | 6.00162974  | 5.118199861 | 6.639751569  | 5.572311655 | 5.97264868  | 5.199105756 | 6.320121779  |
| CTPS2     | 5.59376861  | 6.999754246 | 5.163712317 | 5.284292973 | 5.369056011 | 5.249622351  | 6.058785775 | 6.43554107  | 6.412725651 | 5.95701811  | 6.048764083 | 6.583740884 | 6.165567792 | 5.429297724  | 5.77929492  | 6.38813353  | 6.077936463 | 6.880073872  |
| PARK2     | 7.019490869 | 6.004460269 | 5.299138194 | 6.209134608 | 5.171334524 | 5.204531877  | 6.037066699 | 6.598170532 | 6.835988367 | 6.930951011 | 7.132256002 | 7.196324632 | 3.77133594  | 5.400300117  | 5.277960784 | 6.803500622 | 7.982996171 | 6.68345961   |
| TYH1      | 5.378468682 | 5.319530669 | 7.0731309   | 5.711025753 | 5.372869527 | 5.368075676  | 5.698510522 | 6.025499518 | 6.025499518 | 6.036495222 | 6.68653456  | 6.190251216 | 6.08431902  | 6.8490094208 | 6.42907473  | 5.971757455 | 5.62400074  | 6.126626853  |
| RECK      | 6.027646528 | 6.515983965 | 5.16723392  | 5.732290674 | 5.460061215 | 5.172209511  | 5.171346059 | 5.78386552  | 6.025499518 | 6.036495222 | 6.68653456  | 6.190251216 | 6.08431902  | 6.8490094208 | 6.42907473  | 5.971757455 | 5.62400074  | 6.126626853  |
| C16orf85  | 5.53780212  | 6.417329277 | 6.29000302  | 5.973697994 | 6.011013391 | 5.986174033  | 6.088840688 | 5.813745327 | 5.97303897  | 5.864983375 | 6.112101879 | 5.916324181 | 6.988525061 | 6.5208792    | 5.889177673 | 6.204463636 | 5.242941411 | 5.909570074  |
| TRAF3     | 6.29474058  | 5.807918572 | 5.807918572 | 5.807918572 | 5.807918572 | 5.807918572  | 5.807918572 | 5.807918572 | 5.807918572 | 5.807918572 | 5.807918572 | 5.807918572 | 5.807918572 | 5.807918572  | 5.807918572 | 5.807918572 | 5.807918572 | 5.807918572  |
| NTRC1B    | 6.094338129 | 5.99481015  | 6.383360124 | 6.593539836 | 6.36347402  | 6.588812034  | 6.101779523 | 6.101779523 | 6.101779523 | 6.101779523 | 6.101779523 | 6.101779523 | 6.101779523 | 6.101779523  | 6.101779523 | 6.101779523 | 6.101779523 | 6.101779523  |
| GLMN      | 5.367297532 | 6.007758366 | 5.53859553  | 6.55823136  | 6.32236067  | 5.505752128  | 6.00851558  | 5.984235567 | 5.5647766   | 6.00619649  | 5.808876243 | 5.366398925 | 6.738547268 | 5.500644631  | 6.086974175 | 5.981541091 | 6.100411402 | 6.126125044  |
| LCAS      | 5.104491248 | 6.056161921 | 6.038660511 | 6.346800815 | 6.049238462 | 5.104619214  | 5.440304845 | 6.048160489 | 6.064501971 | 5.604224628 | 5.102555949 | 6.59529329  | 5.915200022 | 6.4371377    | 5.667217514 | 6.354548424 | 6.13454191  | 6.354548424  |
| ADCK1     | 5.317286013 | 6.215212321 | 6.952192345 | 5.392919876 | 6.379530478 | 6.403439478  | 6.03486679  | 6.25665107  | 6.035191919 | 5.953760131 | 5.626026766 | 6.888419311 | 3.576161011 | 5.800428521  | 5.367293141 | 5.911384245 | 6.373550735 | 6.14531491   |
| DETI      | 5.379871023 | 5.532535124 | 5.986884719 | 5.734570138 | 5.968209579 | 6.121225062  | 5.747383868 | 5.96820956  | 6.232738235 | 6.035295719 | 5.62518739  | 6.349570665 | 5.896564104 | 5.806314003  | 5.942750125 | 6.245732435 | 6.169782726 | 6.27780247   |
| C20orf80  | 6.313818935 | 6.386193204 | 6.953212051 | 6.763288972 | 6.955112485 | 6.028904718  | 5.027622708 | 5.939397939 | 6.049519814 | 6.299893383 | 6.194461695 | 5.024234325 | 5.024408552 | 6.88020796   | 5.126631666 | 5.458660323 | 6.170719342 | 5.004483943  |
| TRAF13    | 6.281957381 | 6.281957381 | 6.281957381 | 6.281957381 | 6.281957381 | 6.281957381  | 6.281957381 | 6.281957381 | 6.281957381 | 6.281957381 | 6.281957381 | 6.281957381 | 6.281957381 | 6.281957381  | 6.281957381 | 6.281957381 | 6.281957381 | 6.281957381  |
| PHF13     | 6.202373784 | 6.73793757  | 6.23284005  | 5.601123845 | 5.674112485 | 5.818179867  | 5.916321241 | 6.015491012 | 5.893966536 | 6.128230028 | 5.981527076 | 6.401919771 | 6.181203781 | 6.637466820  | 6.000099743 | 5.708318883 | 5.708318883 | 6.000099743  |
| MCFL2     | 5.762313971 | 5.711003036 | 6.171100698 | 6.009211516 | 6.48987611  | 5.696647953  | 6.338116151 | 6.410611097 | 5.717522587 | 6.176656833 | 5.702527857 | 5.822734272 | 5.812601229 | 6.484257683  | 6.015683562 | 5.97313253  | 5.97313253  | 6.015683562  |
| BEND4     | 7.194400689 | 5.015609683 | 5.015609683 | 5.00905395  | 5.01088111  | 5.679494823  | 5.338434714 | 5.966335914 | 5.788434256 | 5.018438913 | 6.626259293 | 7.184895333 | 6.23535873  | 6.182782791  | 6.104334764 | 5.6467133   | 5.6467133   | 6.104334764  |
| ZNF25     | 6.393868888 | 5.829900392 | 6.820143815 | 5.24853277  | 6.001795332 | 6.615139745  | 5.520762091 | 5.914130379 | 6.053752183 | 6.681548017 | 5.81544883  | 6.278733318 | 6.622396134 | 5.262531005  | 6.115280941 | 6.110098791 | 5.736204936 | 6.170366659  |
| GT2FHC4   | 6.205801628 | 5.958051622 | 5.878510421 | 5.988056122 | 5.878510421 | 5.878510421  | 5.878510421 | 5.878510421 | 5.878510421 | 5.878510421 | 5.878510421 | 5.878510421 | 5.878510421 | 5.878510421  | 5.878510421 | 5.878510421 | 5.878510421 | 5.878510421  |
| PDPD      | 5.083790124 | 5.274801447 | 6.437808157 | 5.066910752 | 5.07480659  | 6.265609339  | 6.526092264 | 5.330272887 | 6.599015856 | 6.484264477 | 6.197928194 | 6.957690202 | 5.081075528 | 6.111960585  | 5.447581884 | 5.646960423 | 5.772899545 | 5.692153491  |
| JAM2      | 6.06467889  | 5.744572258 | 5.744572258 | 5.06467889  | 5.953986914 | 5.953986914  |             |             |             |             |             |             |             |              |             |             |             |              |

|           |             |              |              |             |             |              |             |             |             |             |             |             |             |             |             |             |             |              |
|-----------|-------------|--------------|--------------|-------------|-------------|--------------|-------------|-------------|-------------|-------------|-------------|-------------|-------------|-------------|-------------|-------------|-------------|--------------|
| CACN83    | 6.55598294  | 6.542901028  | 5.386837025  | 6.809591281 | 5.771145241 | 5.634792951  | 5.291680393 | 6.290088133 | 6.365166507 | 6.229209737 | 5.864493451 | 5.8979073   | 5.483125723 | 5.262920932 | 5.90927244  | 5.976280724 | 6.224081919 | 6.338934687  |
| TLR6      | 6.84868523  | 6.78048593   | 6.181975026  | 5.379164388 | 5.686737545 | 6.123710073  | 5.778043068 | 6.091168757 | 5.967199013 | 5.280792236 | 5.400987714 | 5.486599277 | 5.416157005 | 5.917417396 | 5.994497357 | 5.836163351 |             |              |
| TNKS18P1  | 6.057180344 | 6.290402604  | 5.431204704  | 5.076552545 | 5.434751405 | 5.088587656  | 5.341824615 | 6.091218363 | 6.101053869 | 6.179993002 | 6.029761195 | 5.08858923  | 6.096162521 | 5.091129774 | 6.308140874 | 5.792348783 | 5.854179137 | 6.291166379  |
| ZNF138    | 5.390849652 | 5.168263266  | 5.1758615704 | 5.870480143 | 5.859073483 | 5.998828278  | 5.870634079 | 6.295160483 | 5.954703635 | 6.439800902 | 5.919257167 | 5.928857767 | 5.170307477 | 6.509354649 | 6.034809918 | 5.879378679 | 5.630871939 | 5.28981557   |
| SHMS      | 5.931471817 | 5.107550897  | 5.181750327  | 5.191402585 | 6.273095984 | 6.060112139  | 6.043010863 | 5.841156645 | 6.157677225 | 5.841565674 | 6.157677225 | 5.745360074 | 5.947116331 | 5.750252216 | 6.172536004 | 5.618886133 | 6.751161008 | 6.298514008  |
| RNF125    | 5.740661964 | 6.046195634  | 5.490625654  | 5.450625654 | 5.490625654 | 5.97267645   | 5.560245997 | 6.058987819 | 6.058987819 | 6.058987819 | 6.058987819 | 6.058987819 | 6.058987819 | 6.058987819 | 6.058987819 | 6.058987819 | 6.058987819 | 6.058987819  |
| TNCS9     | 6.41300563  | 6.607807522  | 5.430240716  | 6.199846686 | 6.41408327  | 5.45281222   | 5.19492326  | 5.955852943 | 6.001075637 | 5.954758087 | 6.001369777 | 5.251685535 | 5.24681997  | 6.694060357 | 5.82023685  | 6.065207020 | 5.796001033 | 5.925214338  |
| ZNF594    | 6.631965978 | 5.6378186025 | 5.235588626  | 5.283598232 | 5.870981255 | 5.324520874  | 6.189176681 | 6.006129543 | 5.884955086 | 5.449422273 | 6.239445982 | 5.45838567  | 6.44552174  | 5.405396896 | 6.103406892 | 5.150629242 | 5.606462387 | 7.07528524   |
| VN22      | 5.280423201 | 6.883940733  | 5.114537217  | 6.826255229 | 5.20629295  | 6.498385653  | 5.401317969 | 5.964771264 | 6.465839651 | 5.912207295 | 5.505558986 | 6.160314573 | 7.349179179 | 5.125767947 | 5.830890975 | 6.129411644 | 5.750299183 | 5.900715812  |
| SLC25A53  | 5.584304213 | 6.276070776  | 6.126226654  | 5.152778984 | 5.147398737 | 5.304352018  | 6.322477893 | 5.996942029 | 5.558394246 | 6.139551278 | 5.760729523 | 6.301036639 | 5.892663802 | 5.238554384 | 5.925242326 | 6.234352877 | 6.003403617 | 5.949645115  |
| NHPH-ACA1 | 6.014924715 | 6.3349131666 | 5.651718773  | 5.300389679 | 6.031025098 | 5.521372291  | 5.490804031 | 5.909868111 | 5.984843784 | 6.105138394 | 5.263773673 | 6.669104732 | 6.04343925  | 6.192539657 | 5.995773274 | 5.772898082 | 5.929630717 | 5.296301771  |
| CDCD169   | 5.842102627 | 6.66884461   | 5.208212857  | 5.300452934 | 5.214971023 | 5.198890679  | 5.393210724 | 6.214178217 | 5.26675785  | 5.943657539 | 6.040108495 | 6.998465707 | 6.556658887 | 6.818131333 | 6.263460104 | 5.594772538 | 6.153735558 | 5.713912919  |
| LCGL54    | 4.70811616  | 4.940173195  | 4.810379828  | 6.501787924 | 6.418474833 | 6.605489916  | 6.457869159 | 5.56149323  | 5.56149323  | 5.56149323  | 5.56149323  | 5.56149323  | 5.56149323  | 5.56149323  | 5.56149323  | 5.56149323  | 5.56149323  | 5.56149323   |
| SLC16A10  | 4.968464931 | 8.070778054  | 4.962538411  | 4.905449795 | 5.016139459 | 7.379949442  | 4.974063279 | 5.95635873  | 7.169578321 | 6.241811945 | 5.708300468 | 4.990878011 | 8.027221816 | 6.135840726 | 6.091893805 | 6.135779916 | 5.773372092 | 7.830709567  |
| KBTB06    | 6.683679319 | 5.105955033  | 5.290843318  | 5.483531179 | 5.635432333 | 5.400105552  | 5.344263022 | 5.982269111 | 6.005404561 | 6.043072626 | 5.601754542 | 6.470025962 | 5.392939509 | 5.273677709 | 5.963510589 | 5.900237478 | 6.434503373 | 5.945352629  |
| H0XD1     | 6.204791694 | 5.094880407  | 5.094880407  | 5.132899606 | 5.172492854 | 5.595979701  | 6.508826338 | 6.466251706 | 6.348557965 | 6.29438654  | 6.555973753 | 5.500632698 | 6.236828348 | 5.102893211 | 5.938852953 | 5.936845152 | 5.20743623  | 5.925404399  |
| FMN1      | 6.111588663 | 5.857353881  | 5.860332248  | 5.720361412 | 5.944108576 | 5.947244928  | 5.929836837 | 5.85859405  | 6.888051949 | 5.826351949 | 5.830646884 | 5.938571884 | 5.931032509 | 5.984498964 | 6.406691818 | 5.759664658 | 5.783190778 | 6.75233717   |
| SOCS7     | 5.467789816 | 5.066262413  | 5.704838695  | 5.896650823 | 5.492006907 | 5.708819757  | 6.384980815 | 6.712206417 | 6.082495961 | 5.021606417 | 5.80479546  | 6.040080147 | 6.666157891 | 6.860053829 | 6.285992016 | 6.134186636 | 5.963116619 | 5.648909229  |
| STK1A     | 5.328160916 | 5.906071187  | 6.739238605  | 5.59704429  | 5.897783673 | 6.479064174  | 5.935124234 | 6.330683414 | 5.072704694 | 6.281939564 | 5.80141727  | 5.221643571 | 5.629645434 | 5.2272223   | 6.069516317 | 5.922864033 | 5.858389333 | 5.997136771  |
| FXR       | 6.559011771 | 5.588984651  | 6.29762857   | 6.093419385 | 5.142937577 | 5.150112725  | 5.149321806 | 5.921247629 | 6.107840202 | 6.054563114 | 6.85304948  | 6.68329631  | 5.14734222  | 6.34737309  | 6.26564681  | 6.934822803 | 5.854302612 | 6.200705625  |
| IGF1R     | 5.81977077  | 7.015304826  | 5.785750597  | 5.853015562 | 5.293952122 | 5.157833787  | 5.360289166 | 6.147115413 | 6.555385176 | 6.818434473 | 6.084833018 | 5.323021029 | 5.625515183 | 5.471716415 | 6.150836741 | 5.741101276 | 6.461755227 | 5.998545447  |
| ZBT26     | 5.968619127 | 5.080636367  | 6.490636367  | 5.080636367 | 6.286206327 | 6.639474451  | 5.22954256  | 5.822435973 | 5.824890599 | 5.816890599 | 6.803094676 | 6.092762281 | 5.099501988 | 6.231160606 | 6.231160606 | 6.762328329 | 6.186993444 | 6.602714107  |
| CNTNAP1   | 6.167745093 | 6.197171151  | 5.633167481  | 6.342116397 | 5.928466203 | 5.960005511  | 5.627139227 | 6.271987363 | 5.848063714 | 6.219697675 | 5.898677265 | 5.92228836  | 6.611365597 | 5.789206935 | 6.010416175 | 5.855328306 | 6.240253194 | 5.882170665  |
| ARIH205   | 5.541645993 | 5.620394597  | 6.130264011  | 5.989200251 | 5.437796227 | 5.989200251  | 5.12526572  | 5.878051084 | 5.877864558 | 5.877758219 | 6.240219822 | 6.501573754 | 5.966495913 | 5.776886821 | 6.104604922 | 6.104604922 | 6.031166108 | 5.928847709  |
| GARNL3    | 5.12088656  | 5.191972097  | 5.191972097  | 5.500091778 | 6.105740222 | 5.200974218  | 6.584252488 | 5.991683344 | 5.93052612  | 5.931721996 | 5.49586813  | 6.382669366 | 6.869342717 | 5.917101047 | 6.015275841 | 6.170791419 | 5.861713866 | 5.760266354  |
| KCTD17    | 6.153989676 | 6.111674865  | 6.164058552  | 5.944569714 | 6.084105865 | 6.8989718545 | 5.669991846 | 6.109726604 | 5.929296047 | 6.270802085 | 5.92219053  | 5.8057727   | 5.939582808 | 6.399143116 | 5.08715743  | 6.348349016 | 5.914879967 | 5.444623493  |
| HMG83     | 5.325107339 | 6.631112557  | 5.473112037  | 6.172641333 | 5.081112111 | 5.090513321  | 6.666632244 | 6.270802085 | 5.92219053  | 5.8057727   | 5.939582808 | 6.399143116 | 5.08715743  | 6.348349016 | 5.914879967 | 5.444623493 | 5.7308748   | 6.028335527  |
| ITGA11    | 5.740594391 | 5.403017617  | 5.403017617  | 5.403017617 | 5.403017617 | 5.403017617  | 5.403017617 | 5.403017617 | 5.403017617 | 5.403017617 | 5.403017617 | 5.403017617 | 5.403017617 | 5.403017617 | 5.403017617 | 5.403017617 | 5.403017617 | 5.403017617  |
| FAM21B    | 5.748395538 | 5.748395538  | 5.443175184  | 5.463123338 | 5.248093944 | 5.925195457  | 5.32775976  | 6.264347924 | 5.264569752 | 5.935884379 | 5.413718821 | 5.379661631 | 6.713108634 | 5.918479858 | 6.621141937 | 5.645361014 | 6.232460119 | 5.928847709  |
| APOLD1    | 6.065079736 | 5.658966774  | 5.646228263  | 5.649831494 | 5.672566164 | 6.43010713   | 5.722698955 | 6.382081769 | 5.903447667 | 5.961271427 | 5.742468891 | 5.932555776 | 5.667996284 | 6.435245788 | 6.53252416  | 6.41063912  | 6.118192544 | 5.898363333  |
| KIF6      | 6.355259320 | 5.839313457  | 5.428270247  | 5.642830922 | 6.403147886 | 5.710682026  | 6.403147886 | 6.064285898 | 6.057901959 | 5.860047636 | 6.646860484 | 6.717309349 | 5.975161534 | 5.905774568 | 5.820592823 | 5.820592823 | 5.820592823 | 5.820592823  |
| SLC35E2   | 5.846077501 | 6.10663468   | 5.891305502  | 5.801158163 | 6.011389255 | 5.799318952  | 5.899104171 | 6.329279763 | 5.854204121 | 6.226699009 | 5.95116392  | 5.929112105 | 5.783513413 | 5.905584664 | 6.107762724 | 5.989714155 | 5.98734146  | 5.764729247  |
| PDGFA     | 5.731292516 | 5.698974007  | 5.936281576  | 5.880134909 | 5.919725074 | 5.840567363  | 6.15370002  | 5.882362565 | 6.079931552 | 5.898051213 | 5.991539956 | 5.76322422  | 6.091849038 | 5.912447565 | 5.941544143 | 5.767008618 |             |              |
| RAB23     | 5.049432781 | 6.257255688  | 5.644881344  | 5.03618075  | 5.944091119 | 6.11208325   | 6.695909336 | 6.206862548 | 6.015382717 | 5.148717799 | 6.320353836 | 5.565641665 | 5.407348147 | 5.033464344 | 5.06512513  | 5.465565598 | 6.112129289 | 5.884447897  |
| TRAF3     | 6.025986785 | 5.709822867  | 5.709822867  | 5.709822867 | 5.709822867 | 5.709822867  | 5.709822867 | 5.709822867 | 5.709822867 | 5.709822867 | 5.709822867 | 5.709822867 | 5.709822867 | 5.709822867 | 5.709822867 | 5.709822867 | 5.709822867 | 5.709822867  |
| TNIP1A1   | 6.107776127 | 6.301507724  | 5.084150825  | 5.084150825 | 5.084150825 | 5.084150825  | 5.084150825 | 5.084150825 | 5.084150825 | 5.084150825 | 5.084150825 | 5.084150825 | 5.084150825 | 5.084150825 | 5.084150825 | 5.084150825 | 5.084150825 | 5.084150825  |
| KCTD2     | 6.363564404 | 5.70963155   | 5.456667701  | 5.741627904 | 5.76407597  | 5.51132046   | 6.538271408 | 6.06101823  | 6.51177298  | 6.102623915 | 6.098318565 | 5.344277946 | 5.196383156 | 5.544068763 | 6.302078793 | 6.102236007 | 6.085273035 | 5.643404038  |
| HLPD4     | 5.686410420 | 5.785580061  | 6.051651961  | 5.385076594 | 5.910749232 | 6.131400821  | 6.251183904 | 6.066096743 | 5.836874958 | 5.986818476 | 6.097868182 | 6.252527053 | 6.204220253 | 5.436223505 | 5.761085277 | 5.828512885 | 5.704835128 | 5.9048190762 |
| UZAF2     | 5.663026984 | 5.64922173   | 6.283672099  | 5.905524556 | 5.898689799 | 6.051542384  | 5.733084722 | 6.067691241 | 5.869778348 | 6.164330418 | 5.934785161 | 5.917320511 | 5.675173854 | 5.701438185 | 6.025032087 | 6.028160689 | 6.203595005 | 5.81342238   |
| ILK3      | 5.899751254 | 5.922892818  | 5.698229531  | 5.723990442 | 5.200674272 | 5.954608125  | 6.320230372 | 5.942188906 | 6.094754995 | 5.757575969 | 5.576544173 | 5.520242142 | 5.399792415 | 6.218726644 | 6.054726843 | 6.173505566 |             |              |
| LMLN      | 5.737197463 | 5.375151463  | 5.439865771  | 5.337497079 | 6.031117571 | 5.992296119  | 6.25725835  | 6.133060744 | 5.057226503 | 6.360272477 | 5.613130945 | 5.909257619 | 5.939946814 | 5.91380262  | 6.488697367 | 6.661294817 | 5.418271939 | 5.844873781  |
| NAPS4     | 5.795482628 | 6.382027788  | 5.935870996  | 5.419679606 | 5.868216332 | 5.71601538   | 5.261989584 | 6.57940     |             |             |             |             |             |             |             |             |             |              |

|             |              |             |              |             |             |             |              |             |             |              |             |             |             |             |             |             |             |             |
|-------------|--------------|-------------|--------------|-------------|-------------|-------------|--------------|-------------|-------------|--------------|-------------|-------------|-------------|-------------|-------------|-------------|-------------|-------------|
| RP1-34B2.0J | 6.49840159   | 5.27450903  | 6.34467486   | 6.06276649  | 5.50127212  | 5.95653816  | 5.21147566   | 5.86311729  | 5.72919701  | 5.76100253   | 6.06987361  | 5.77646237  | 5.65442967  | 6.394438716 | 5.98040769  | 5.5461359   | 5.876734536 | 6.012288637 |
| RS12        | 5.307561303  | 5.31686531  | 5.32118608   | 5.34860196  | 5.372152712 | 5.379216306 | 5.37255737   | 5.238129244 | 5.30086874  | 5.595165016  | 6.418192022 | 5.31226416  | 5.295973297 | 5.487939571 | 6.162006083 | 6.835422678 | 6.450875912 | 6.571752751 |
| PS1K        | 6.27820196   | 5.24590139  | 5.836516822  | 5.576305878 | 6.203251524 | 6.68001082  | 5.791686724  | 5.948388173 | 5.8969286   | 6.5993042197 | 5.80879027  | 6.136580838 | 5.48323637  | 6.299015281 | 5.786100296 | 5.806038125 | 6.111469171 | 5.779705529 |
| RP5K4       | 5.742634633  | 6.419051479 | 5.20466929   | 6.285366922 | 5.79586658  | 5.89619066  | 6.22217967   | 6.087402152 | 5.715154645 | 5.679374797  | 5.84492947  | 5.94579488  | 5.206132542 | 5.888652596 | 5.956204249 | 4.755445195 | 5.96672034  | 6.29119141  |
| ZNF42       | 5.67116843   | 6.25026175  | 5.81827118   | 5.71872158  | 5.8396072   | 5.17714353  | 5.17714353   | 5.77482798  | 5.801293751 | 5.801293751  | 5.801293751 | 5.214007751 | 6.278846603 | 5.402132443 | 5.19845839  | 6.457552865 | 6.07862329  | 5.78812929  |
| SMAD4       | 4.962771024  | 5.189466881 | 6.490346181  | 6.490346181 | 6.490346181 | 6.490346181 | 6.490346181  | 6.490346181 | 6.490346181 | 6.490346181  | 6.490346181 | 6.490346181 | 6.490346181 | 6.490346181 | 6.490346181 | 6.490346181 | 6.490346181 | 6.490346181 |
| MAGIX       | 5.114904904  | 5.792224194 | 5.11708212   | 5.109557566 | 5.878530963 | 6.356283321 | 6.08478521   | 6.010616792 | 6.017806112 | 5.844232979  | 5.644776103 | 6.103693683 | 5.12079136  | 6.602907846 | 6.050415685 | 5.540573616 | 5.50117535  | 5.97586215  |
| RP5D2       | 6.48437534   | 6.612503878 | 5.612503878  | 5.612503878 | 5.612503878 | 5.612503878 | 5.612503878  | 5.612503878 | 5.612503878 | 5.612503878  | 5.612503878 | 5.612503878 | 5.612503878 | 5.612503878 | 5.612503878 | 5.612503878 | 5.612503878 | 5.612503878 |
| MARK4       | 5.884458054  | 6.590261007 | 6.063681841  | 5.712403663 | 5.59976979  | 5.540238259 | 5.572272795  | 5.991962249 | 5.669731581 | 6.04038072   | 6.006050589 | 5.74268528  | 5.839290281 | 6.100240552 | 5.947836686 | 5.761633672 | 5.935203287 | 5.790980512 |
| RP5D1       | 5.6148376871 | 5.398226926 | 5.591277988  | 5.591277988 | 5.591277988 | 5.591277988 | 5.591277988  | 5.591277988 | 5.591277988 | 5.591277988  | 5.591277988 | 5.591277988 | 5.591277988 | 5.591277988 | 5.591277988 | 5.591277988 | 5.591277988 | 5.591277988 |
| WRD66       | 5.662780075  | 5.662780075 | 5.662780075  | 5.662780075 | 5.662780075 | 5.662780075 | 5.662780075  | 5.662780075 | 5.662780075 | 5.662780075  | 5.662780075 | 5.662780075 | 5.662780075 | 5.662780075 | 5.662780075 | 5.662780075 | 5.662780075 | 5.662780075 |
| RP11-727F11 | 6.021649997  | 5.988478953 | 5.436754704  | 5.148172311 | 5.413446036 | 5.213643981 | 5.725112091  | 5.863069597 | 5.858417021 | 6.038215221  | 6.038215221 | 6.038215221 | 6.038215221 | 6.038215221 | 6.038215221 | 6.038215221 | 6.038215221 | 6.038215221 |
| TRIM16      | 6.607471101  | 5.87148957  | 5.87148957   | 6.120132049 | 6.206202922 | 5.764048208 | 6.078771456  | 6.00039884  | 5.756154942 | 5.829013056  | 5.75423991  | 5.97733086  | 8.97881368  | 6.39401691  | 5.848675188 | 6.02143763  | 5.885625141 | 5.857574542 |
| SYNM        | 6.158776974  | 6.134639927 | 5.926600923  | 5.733704515 | 6.363247223 | 5.834872724 | 5.819457278  | 6.295766214 | 5.818944465 | 6.032939644  | 6.004427481 | 5.840587637 | 5.987437721 | 7.352122023 | 5.405055074 | 5.744073598 | 5.794378644 | 5.888799553 |
| RP5K11      | 5.280248333  | 5.869517619 | 5.969377215  | 5.969377215 | 5.969377215 | 5.969377215 | 5.969377215  | 5.969377215 | 5.969377215 | 5.969377215  | 5.969377215 | 5.969377215 | 5.969377215 | 5.969377215 | 5.969377215 | 5.969377215 | 5.969377215 | 5.969377215 |
| LARC57B     | 6.475215804  | 6.111214673 | 5.922245627  | 6.833341171 | 5.142392449 | 5.105987101 | 6.115954988  | 5.76955335  | 5.76955335  | 6.124149676  | 5.69678674  | 5.147540046 | 6.501521148 | 5.154182756 | 5.759019343 | 5.789725947 | 6.502052434 | 6.632351335 |
| COF66       | 5.962577734  | 5.637133584 | 6.085085907  | 6.085085907 | 6.085085907 | 6.085085907 | 6.085085907  | 6.085085907 | 6.085085907 | 6.085085907  | 6.085085907 | 6.085085907 | 6.085085907 | 6.085085907 | 6.085085907 | 6.085085907 | 6.085085907 | 6.085085907 |
| LTC45       | 5.701067382  | 6.026991121 | 5.676879752  | 5.28711135  | 6.483949683 | 6.256001705 | 6.061653826  | 5.802230108 | 6.044786304 | 5.802230108  | 6.044786304 | 5.250918709 | 7.009490986 | 6.116250272 | 5.826631381 | 5.758634488 | 5.607271265 | 5.75810273  |
| CIST7       | 5.742338164  | 5.921389129 | 6.250071466  | 5.921389129 | 5.921389129 | 5.921389129 | 5.921389129  | 5.921389129 | 5.921389129 | 5.921389129  | 5.921389129 | 5.921389129 | 5.921389129 | 5.921389129 | 5.921389129 | 5.921389129 | 5.921389129 | 5.921389129 |
| GRP75-ASB3  | 7.012068612  | 5.683222754 | 6.023979728  | 5.8171584   | 5.922072966 | 5.567394403 | 5.91240165   | 5.567394403 | 5.567394403 | 5.567394403  | 5.567394403 | 5.567394403 | 5.567394403 | 5.567394403 | 5.567394403 | 5.567394403 | 5.567394403 | 5.567394403 |
| SDL2        | 6.534721158  | 6.191378843 | 5.861089894  | 5.1122929   | 5.870945756 | 5.12393552  | 6.16878141   | 5.698673622 | 5.753525168 | 5.986861881  | 5.513617024 | 5.120858994 | 5.46736764  | 6.392989879 | 5.910442432 | 5.838784791 | 5.524589889 | 5.960230631 |
| PO616       | 5.680237732  | 5.145192044 | 5.3292232    | 5.634727232 | 5.764783941 | 5.148576612 | 6.1709054    | 6.010867632 | 5.923697734 | 5.77870494   | 6.010867632 | 5.923697734 | 5.146474327 | 5.918760574 | 6.585239958 | 5.698416477 | 6.005284589 | 5.958703403 |
| ARHF626     | 5.818393996  | 5.750152145 | 5.800278902  | 5.750152145 | 5.750152145 | 5.750152145 | 5.750152145  | 5.750152145 | 5.750152145 | 5.750152145  | 5.750152145 | 5.750152145 | 5.750152145 | 5.750152145 | 5.750152145 | 5.750152145 | 5.750152145 | 5.750152145 |
| CPV3AS      | 5.700560474  | 5.626254737 | 5.7128214642 | 5.659336061 | 5.600239931 | 5.76890081  | 5.550247391  | 7.150837145 | 5.655995719 | 6.9571826619 | 6.014457708 | 5.827880129 | 5.867012834 | 5.545988814 | 6.298529755 | 5.828418387 | 6.187526446 | 6.88976014  |
| CHR8-CP18   | 5.648055205  | 5.453649683 | 5.486480034  | 5.933650639 | 6.156451388 | 5.466262061 | 6.079691178  | 5.90697207  | 5.605136972 | 6.22952660   | 5.620335958 | 5.459592562 | 5.505712511 | 5.513835649 | 6.204923273 | 5.786970468 | 6.437723884 | 6.101780197 |
| HRP5        | 5.719130027  | 5.581931927 | 5.581931927  | 5.581931927 | 5.581931927 | 5.581931927 | 5.581931927  | 5.581931927 | 5.581931927 | 5.581931927  | 5.581931927 | 5.581931927 | 5.581931927 | 5.581931927 | 5.581931927 | 5.581931927 | 5.581931927 | 5.581931927 |
| CP5E-PB2.1  | 4.912193056  | 5.243272226 | 5.640211456  | 5.243272226 | 5.243272226 | 5.243272226 | 5.243272226  | 5.243272226 | 5.243272226 | 5.243272226  | 5.243272226 | 5.243272226 | 5.243272226 | 5.243272226 | 5.243272226 | 5.243272226 | 5.243272226 | 5.243272226 |
| SLC35G1     | 6.334414953  | 5.11643141  | 5.735324013  | 5.617688976 | 6.714617905 | 5.130046872 | 5.07598117   | 5.631550633 | 5.548267424 | 5.830662029  | 5.825750447 | 6.094183975 | 5.782623225 | 5.142331096 | 5.860085399 | 6.037084186 | 6.510745949 | 7.151919576 |
| LPN3        | 5.76845204   | 5.99192505  | 5.830774955  | 5.830774955 | 5.830774955 | 5.830774955 | 5.830774955  | 5.830774955 | 5.830774955 | 5.830774955  | 5.830774955 | 5.830774955 | 5.830774955 | 5.830774955 | 5.830774955 | 5.830774955 | 5.830774955 | 5.830774955 |
| EK1         | 6.072806523  | 5.703728804 | 5.218002974  | 5.938791619 | 5.37844702  | 5.238264036 | 5.269711348  | 5.815048098 | 5.872007211 | 6.031558559  | 5.950796026 | 6.01232746  | 5.702104416 | 5.124770879 | 6.109065669 | 6.23695937  | 6.117707965 | 5.542606698 |
| JRK         | 5.889682657  | 6.583586779 | 5.601802873  | 5.461646407 | 6.60589024  | 5.378473935 | 5.50047753   | 6.094647686 | 5.800247283 | 6.031558559  | 5.950796026 | 6.01232746  | 5.702104416 | 5.124770879 | 6.109065669 | 6.23695937  | 6.117707965 | 5.542606698 |
| IFP1        | 5.603957651  | 5.94039624  | 6.31595617   | 5.109756914 | 6.533483147 | 6.260140992 | 5.1386021454 | 6.272725677 | 5.613646789 | 5.833833376  | 5.849921513 | 7.028422585 | 5.216895225 | 5.156511052 | 6.207963887 | 5.268697349 | 5.873544076 | 5.747204524 |
| LRC56       | 5.78015184   | 5.589619895 | 5.854441123  | 5.31849038  | 5.584441123 | 5.31849038  | 5.925145526  | 5.79781441  | 5.673780953 | 5.79781441   | 5.673780953 | 5.79781441  | 5.673780953 | 5.79781441  | 5.673780953 | 5.79781441  | 5.673780953 | 5.79781441  |
| ABCC2       | 5.785284868  | 5.944894181 | 5.662326     | 5.944894181 | 5.74566341  | 5.60221666  | 5.637777889  | 5.77088547  | 5.77088547  | 5.77088547   | 5.77088547  | 5.77088547  | 5.77088547  | 5.77088547  | 5.77088547  | 5.77088547  | 5.77088547  | 5.77088547  |
| ZNF852      | 6.152440329  | 5.349139767 | 5.390845195  | 6.227272722 | 5.983483888 | 5.83465467  | 5.385421759  | 5.648254208 | 5.971641275 | 5.624328384  | 5.881548306 | 5.847534713 | 5.404119435 | 5.505468286 | 5.682238875 | 6.309705362 | 6.835468228 | 6.1092062   |
| FL13G       | 5.73958151   | 5.831394608 | 5.62648182   | 5.779102712 | 5.288360527 | 5.839484482 | 5.839484482  | 5.839484482 | 5.839484482 | 5.839484482  | 5.839484482 | 5.839484482 | 5.839484482 | 5.839484482 | 5.839484482 | 5.839484482 | 5.839484482 | 5.839484482 |
| THB53       | 6.026790329  | 5.697324811 | 5.236701474  | 6.507376642 | 5.034030108 | 5.743962733 | 5.91918169   | 6.308282295 | 5.729236014 | 5.867861399  | 5.680954575 | 5.377299599 | 5.041142975 | 6.059890325 | 5.814303    | 5.902477844 | 5.761471403 | 6.189683278 |
| FAM131A     | 5.641347995  | 5.761977013 | 5.244351774  | 5.337830833 | 5.144439314 | 5.404677908 | 5.892721559  | 5.892721559 | 5.892721559 | 5.892721559  | 5.892721559 | 5.892721559 | 5.892721559 | 5.892721559 | 5.892721559 | 5.892721559 | 5.892721559 | 5.892721559 |
| TLL1        | 5.311391723  | 6.93976031  | 5.55760392   | 6.488489349 | 5.091312615 | 6.371630072 | 5.7850494    | 5.645792518 | 6.62534145  | 5.515980096  | 6.08294289  | 6.10538886  | 5.096553266 | 5.103020098 | 6.051462969 | 6.040749905 | 5.890754495 | 6.524900764 |
| ZNF571      | 5.70401269   | 5.139389195 | 7.68578668   | 5.935239485 | 5.07869203  | 5.271694501 | 5.433921784  | 5.864927    | 6.075749518 | 5.670759592  | 5.670759592 | 5.670759592 | 5.670759592 | 5.670759592 | 5.670759592 | 5.670759592 | 5.670759592 | 5.670759592 |
| ZNF42       | 5.37324685   | 5.922140397 | 5.922140397  | 5.922140397 | 5.922140397 | 5.922140397 | 5.922140397  | 5.922140397 | 5.922140397 | 5.922140397  | 5.922140397 | 5.922140397 | 5.922140397 | 5.922140397 | 5.922140397 | 5.922140397 | 5.922140397 | 5.922140397 |
| ACD11       | 5.73477004   | 5.399721868 | 5.690483778  | 5.86883927  | 5.789125362 | 5.66405159  | 5            |             |             |              |             |             |             |             |             |             |             |             |

|         |              |             |             |              |             |             |             |             |             |             |             |             |             |             |             |             |             |             |
|---------|--------------|-------------|-------------|--------------|-------------|-------------|-------------|-------------|-------------|-------------|-------------|-------------|-------------|-------------|-------------|-------------|-------------|-------------|
| KIRD1   | 5.943610792  | 5.754340206 | 5.76185169  | 5.815017166  | 5.700634579 | 5.598956552 | 5.665818766 | 6.449657285 | 5.899303866 | 6.062662208 | 5.800196826 | 5.789995133 | 5.795215098 | 5.978079859 | 6.613640007 | 5.742080914 | 6.047787988 | 5.761026181 |
| PRELUD2 | 5.702901595  | 5.961240013 | 5.032376903 | 6.757826591  | 5.601466116 | 5.037312827 | 6.658488373 | 5.945755159 | 5.356522935 | 6.021466271 | 6.379132357 | 5.364841884 | 5.504350714 | 5.878984853 | 5.706036556 | 5.263988101 | 6.359090307 | 5.499656581 |
| ATPV1C2 | 5.496956581  | 5.831785662 | 5.207400108 | 6.086495175  | 6.259843195 | 5.427531673 | 5.679917637 | 5.964084759 | 6.601718208 | 5.882981121 | 5.568701064 | 5.268849771 | 5.76767169  | 5.652030083 | 5.800388225 | 6.11575754  | 5.780370746 | 5.444399813 |
| ZCH4    | 5.444399813  | 6.358739109 | 5.722192005 | 5.457279617  | 5.81197363  | 6.252836692 | 5.531892087 | 6.144620739 | 6.169655293 | 5.797324476 | 5.685242603 | 5.504004141 | 5.780857605 | 6.575703665 | 5.97705254  | 5.60200502  | 5.851653159 | 5.7639304   |
| PNL     | 5.305110567  | 5.274451766 | 5.011764004 | 5.274451766  | 5.126648067 | 6.393381714 | 6.750973861 | 6.364566469 | 6.364566469 | 6.364566469 | 6.068561743 | 5.297802152 | 5.378526344 | 5.515807554 | 5.300079442 | 5.378526344 | 5.08628892  | 5.659157193 |
| WTP     | 5.658715937  | 5.710431501 | 5.576724078 | 5.678202651  | 5.589310271 | 5.799402194 | 6.045680824 | 5.588447373 | 5.588447373 | 5.588447373 | 5.588447373 | 5.588447373 | 5.588447373 | 5.588447373 | 5.588447373 | 5.588447373 | 5.588447373 | 5.588447373 |
| KCTD11  | 5.405262073  | 5.828366636 | 5.1754789   | 5.165355758  | 5.346117028 | 6.39649718  | 5.571681962 | 5.876018615 | 5.732680051 | 6.052077492 | 5.607566538 | 5.63832317  | 5.931086378 | 5.992268423 | 5.879124218 | 5.64770948  | 5.739726823 | 5.344710573 |
| DCX     | 6.823612675  | 5.89460523  | 5.847400523 | 5.69420165   | 5.712110429 | 5.887086752 | 5.903908496 | 5.686258518 | 5.686258518 | 5.686258518 | 5.793064827 | 5.916833419 | 5.903235697 | 5.975466113 | 5.673558464 | 5.77501976  | 5.75971875  | 5.599991276 |
| RAB33A  | 5.94351149   | 6.451408281 | 5.311602797 | 5.508219633  | 6.051519538 | 5.119784848 | 6.154969036 | 5.578584893 | 5.728877957 | 5.461219972 | 5.83971193  | 6.005307073 | 5.594013214 | 5.512196804 | 5.964705677 | 6.216078985 | 5.651252163 | 5.294504818 |
| CDADC1  | 6.159156587  | 5.859429388 | 5.862842286 | 5.58242658   | 5.23733642  | 5.920854172 | 5.202854172 | 5.703707175 | 5.402938411 | 5.61242758  | 5.993076348 | 6.08596634  | 6.385942134 | 5.14340075  | 5.723688263 | 5.763140577 | 5.82123802  | 5.79811104  |
| TBC1D31 | 6.296405327  | 5.959998376 | 5.307621549 | 5.576320292  | 6.448434201 | 6.436295224 | 5.316277222 | 5.604544454 | 6.050279618 | 5.723570018 | 5.55437707  | 5.31295925  | 6.241939476 | 5.32205924  | 5.599902986 | 6.03610193  | 5.92471607  | 5.837447759 |
| TNSA9E1 | 6.289967319  | 5.416629    | 5.436644771 | 6.632861308  | 6.150001686 | 5.690586656 | 5.84908431  | 5.71749128  | 6.114857042 | 5.581469041 | 5.682126791 | 5.078878865 | 5.885099905 | 5.084183067 | 5.459121539 | 5.633244997 | 5.52932677  | 5.52960109  |
| GM1     | 6.106381538  | 5.973602469 | 5.327900987 | 5.973602469  | 5.327900987 | 5.51253096  | 5.336879151 | 5.46351074  | 6.183022066 | 5.113232771 | 5.329793701 | 5.926004848 | 5.633169315 | 6.317241661 | 5.67819773  | 5.592584716 | 5.53286966  |             |
| EMP2    | 5.369939081  | 6.436788606 | 5.557014999 | 5.462833639  | 5.413907145 | 5.44784138  | 5.764635015 | 5.363605205 | 5.793271165 | 5.66133346  | 6.257913912 | 6.273421074 | 7.088086832 | 6.772625758 | 5.59747518  | 5.89921316  | 7.138544842 |             |
| HST1H1D | 5.73549811   | 5.837952074 | 5.513509816 | 5.415340952  | 5.505896265 | 5.55733895  | 5.268012633 | 5.920902546 | 5.886205296 | 5.672840055 | 5.67719047  | 6.024947952 | 5.235000203 | 5.430572857 | 5.897911993 | 5.840380661 | 5.834034354 | 5.65140374  |
| ZNF54   | 5.495092285  | 6.008716843 | 5.721787672 | 5.352317145  | 5.243236119 | 5.960337185 | 6.259607038 | 5.721898066 | 6.071208695 | 5.983040016 | 5.83717144  | 5.559302767 | 5.322840059 | 5.251906699 | 6.100183591 | 5.830753764 | 5.726206929 | 5.853183692 |
| TSP0A1  | 5.542915186  | 5.359348633 | 5.140050772 | 5.602979415  | 5.099893848 | 5.96037185  | 5.105939284 | 5.509781677 | 5.910407608 | 5.786013564 | 6.839094851 | 5.472098416 | 5.156591821 | 5.767089061 | 5.66673113  | 5.463699419 | 6.143818959 |             |
| CZ2H46  | 6.295621306  | 5.99664662  | 5.803600381 | 5.296513214  | 5.525766219 | 5.290190598 | 5.381252767 | 5.842038804 | 5.634192267 | 6.102889209 | 5.110090555 | 5.276461802 | 6.605948215 | 6.015249716 | 6.152022718 | 6.03495169  | 5.682959794 |             |
| PTPN3   | 5.372018069  | 5.506540049 | 5.490411026 | 5.906549911  | 5.689487945 | 5.504717817 | 5.431032029 | 5.924238386 | 5.439338171 | 5.991696393 | 5.858236904 | 5.370824333 | 6.615103858 | 5.954751517 | 5.933095979 | 5.97032854  | 6.107451479 | 6.44948024  |
| GF11    | 6.146271158  | 6.494361675 | 5.229305015 | 5.986974523  | 5.729394575 | 5.253754557 | 5.21120876  | 5.973961881 | 5.7636708   | 5.7636708   | 6.24863119  | 5.68603328  | 5.747410448 | 5.566158889 | 5.7815647   | 5.80132697  | 5.746004093 | 6.282007274 |
| HFPL2   | 6.3972120514 | 5.31474703  | 5.136925598 | 5.060939175  | 5.849675037 | 5.29319099  | 5.953124677 | 5.620730353 | 5.955379733 | 5.95452864  | 6.110083897 | 5.07477407  | 5.086582137 | 5.951362641 | 5.69546352  | 5.99026792  | 6.16236006  |             |
| ZNF37   | 6.50201375   | 5.026146995 | 5.279118437 | 6.478955449  | 5.150533169 | 5.186262425 | 5.030261702 | 6.07503185  | 6.07503185  | 6.07503185  | 5.628116739 | 5.178871706 | 5.326627956 | 5.301431683 | 6.28400505  | 6.472411574 | 6.221588229 | 5.912595902 |
| MOK     | 6.120284409  | 5.275264209 | 5.207059059 | 5.6318785712 | 5.211447934 | 5.19257549  | 5.283408921 | 6.03744957  | 6.206958234 | 5.859597598 | 5.725493824 | 5.374572923 | 5.142153776 | 6.423776163 | 5.803397324 | 5.736963829 | 6.03448761  | 6.19438661  |
| GIN1    | 5.664847896  | 5.014959655 | 5.225600164 | 5.00897904   | 5.773098361 | 6.008895284 | 5.764823099 | 6.265955646 | 5.836935117 | 5.764837161 | 5.14978706  | 6.88601131  | 6.172379149 | 6.000182873 | 5.627132506 | 5.801826520 | 5.866206996 |             |
| ZRY2    | 6.966447753  | 5.022251112 | 5.022168404 | 5.712809877  | 5.744557614 | 5.87302163  | 5.353360171 | 5.770278422 | 5.622793379 | 5.96010447  | 5.024131718 | 5.024258632 | 5.740377775 | 5.515636483 | 6.210252398 | 5.757898783 | 5.767133007 |             |
| SPRN    | 5.417002053  | 6.437002053 | 6.437002053 | 6.437002053  | 6.437002053 | 6.437002053 | 6.437002053 | 6.437002053 | 6.437002053 | 6.437002053 | 6.437002053 | 6.437002053 | 6.437002053 | 6.437002053 | 6.437002053 | 6.437002053 | 6.437002053 | 6.437002053 |
| ARMXC   | 5.988017443  | 5.694716956 | 5.705406922 | 5.965898192  | 6.293567875 | 5.255249812 | 5.804916421 | 5.755543953 | 5.087595939 | 5.823911019 | 5.90676201  | 5.41287575  | 5.09323233  | 5.094538831 | 6.036912787 | 5.780000295 | 5.71441749  | 6.098168845 |
| MDM1    | 5.452109665  | 5.387193082 | 5.28529876  | 5.387193082  | 5.28529876  | 5.387193082 | 5.28529876  | 5.387193082 | 5.28529876  | 5.387193082 | 5.28529876  | 5.387193082 | 5.28529876  | 5.387193082 | 5.28529876  | 5.387193082 | 5.28529876  | 5.387193082 |
| CD2D    | 5.86563623   | 5.86563623  | 5.86563623  | 5.86563623   | 5.86563623  | 5.86563623  | 5.86563623  | 5.86563623  | 5.86563623  | 5.86563623  | 5.86563623  | 5.86563623  | 5.86563623  | 5.86563623  | 5.86563623  | 5.86563623  | 5.86563623  | 5.86563623  |
| ETV5    | 6.113949384  | 5.542495049 | 5.872406068 | 5.119129164  | 6.073777819 | 5.055857512 | 5.071434344 | 5.767767947 | 5.445216629 | 5.76053117  | 6.02538057  | 5.33985315  | 6.09893164  | 5.09348572  | 5.946652043 | 5.549706431 | 5.857945377 | 5.98678136  |
| CIRL    | 5.657809946  | 5.853217555 | 5.150735177 | 6.420689777  | 6.501471484 | 5.1042956   | 5.842298681 | 5.85231377  | 5.842298681 | 5.85231377  | 5.71726861  | 5.869370232 | 6.027645698 | 5.63569269  | 5.923422021 | 5.534197693 | 5.79448515  | 5.9813232   |
| ATXN7L2 | 5.288469224  | 6.713633303 | 4.981835331 | 6.049929686  | 4.978625226 | 4.98733609  | 6.804169094 | 5.85231377  | 5.849982468 | 5.74957498  | 5.526196403 | 5.279056738 | 5.108184146 | 4.909570296 | 5.762342025 | 5.737525922 | 5.9025711   | 6.148329519 |
| PGBD4   | 6.494888271  | 6.112644648 | 5.312962345 | 6.241464942  | 5.312962345 | 5.312962345 | 6.241464942 | 5.312962345 | 5.312962345 | 5.312962345 | 5.312962345 | 5.312962345 | 5.312962345 | 5.312962345 | 5.312962345 | 5.312962345 | 5.312962345 | 5.312962345 |
| CEP164  | 5.104553409  | 5.573993764 | 5.104553409 | 5.573993764  | 5.104553409 | 5.573993764 | 5.104553409 | 5.573993764 | 5.104553409 | 5.573993764 | 5.104553409 | 5.573993764 | 5.104553409 | 5.573993764 | 5.104553409 | 5.573993764 | 5.104553409 | 5.573993764 |
| MDM1    | 5.452109665  | 5.387193082 | 5.28529876  | 5.387193082  | 5.28529876  | 5.387193082 | 5.28529876  | 5.387193082 | 5.28529876  | 5.387193082 | 5.28529876  | 5.387193082 | 5.28529876  | 5.387193082 | 5.28529876  | 5.387193082 | 5.28529876  | 5.387193082 |
| ZHBJR   | 5.839061486  | 5.703466794 | 6.03466794  | 5.839061486  | 5.703466794 | 6.03466794  | 5.839061486 | 5.703466794 | 6.03466794  | 5.839061486 | 5.703466794 | 6.03466794  | 5.839061486 | 5.703466794 | 6.03466794  | 5.839061486 | 5.703466794 | 6.03466794  |
| TC21A   | 4.884435575  | 4.880786631 | 4.880696552 | 5.695524543  | 4.877965428 | 4.885378538 | 6.156824528 | 6.210165406 | 5.195394321 | 5.813751601 | 5.91155744  | 4.882407949 | 6.307774877 | 4.888142386 | 5.821651357 | 6.01483547  | 6.11928621  | 6.211448596 |
| ADCY9   | 5.517231581  | 5.20682986  | 5.813477006 | 5.17298865   | 5.165554192 | 5.19203731  | 5.237160257 | 5.88893061  | 6.215916833 | 5.899059761 | 5.800059952 | 5.887585601 | 5.895602094 | 5.858569876 | 5.708307273 | 5.198688749 | 5.585676621 | 5.83120552  |
| IRS1    | 5.891246832  | 5.599793987 | 5.271753278 | 6.132745309  | 5.769423863 | 5.231195878 | 5.977199702 | 5.807367104 | 5.739535903 | 5.73997965  | 5.660628911 | 5.390216709 | 5.636621059 | 5.398836327 | 5.780469317 | 5.922828494 | 5.421800543 | 5.735410673 |
| ZNF880  | 6.158264075  | 6.007786323 | 5.32999168  | 5.32999168   | 5.32999168  | 5.32999168  | 5.32999168  | 5.32999168  | 5.32999168  | 5.32999168  | 5.32999168  | 5.32999168  | 5.32999168  | 5.32999168  | 5.32999168  | 5.32999168  | 5.32999168  | 5.32999168  |
| TBC1D8  | 5.59597026   | 5.40663648  | 5.471792939 | 6.674382712  | 5.77367706  | 5.090274653 | 5.889924661 | 5.732094115 | 5.772082642 | 5.936059642 | 5.84183346  | 5.458615205 | 5.92529342  | 5.239405507 | 5.641895795 | 5.939679859 | 6.057039953 |             |
| TMEM159 | 5.750555958  | 6.436091753 | 6.06753839  | 6.1024447    | 5.344183734 | 5.631020429 | 6.08670267  | 5.964398953 | 5.90529052  | 5.79672289  | 5.677798666 | 5.388828125 | 6.046259394 | 5.514982537 | 5.705139203 | 5.673410394 | 5.572299881 |             |

|            |              |              |             |             |             |             |             |             |             |             |             |             |             |             |             |             |             |             |
|------------|--------------|--------------|-------------|-------------|-------------|-------------|-------------|-------------|-------------|-------------|-------------|-------------|-------------|-------------|-------------|-------------|-------------|-------------|
| ZWFS58     | 5.62107214   | 5.334999527  | 5.403692926 | 7.246875813 | 5.153138974 | 5.28046421  | 5.548131464 | 6.09029294  | 6.17095175  | 5.63201175  | 5.859054637 | 5.256273567 | 6.00841299  | 5.195919076 | 5.784359062 | 6.322596598 | 5.775222678 | 5.83913771  |
| CENPU      | 5.041879923  | 6.536486695  | 6.118021216 | 5.96627686  | 5.025715766 | 6.243511007 | 5.03706078  | 5.749822142 | 5.692061754 | 5.309599885 | 5.724624395 | 6.42407075  | 5.041581241 | 5.045834465 | 5.715267751 | 5.483343989 | 5.474972912 | 5.133176149 |
| SWAGP      | 5.62982955   | 5.658106357  | 5.726364897 | 5.509605296 | 5.238326967 | 5.907244742 | 6.038246296 | 5.682487749 | 5.980057975 | 5.92647699  | 5.92647699  | 5.192883565 | 6.11478509  | 5.913971453 | 5.318264077 | 5.29866245  | 6.249334946 |             |
| CACN42D4   | 6.182474268  | 6.516569749  | 5.032846864 | 6.138721    | 5.030265656 | 5.256789953 | 6.128818792 | 5.406616702 | 5.520296128 | 5.765867363 | 5.941648207 | 5.034485228 | 6.454368416 | 5.939899452 | 5.533305305 | 5.670138543 | 5.736415326 | 6.346190147 |
| TRM356     | 5.138218987  | 5.191168461  | 5.477378208 | 5.107562435 | 5.12561436  | 5.2891702   | 5.617840236 | 6.342757763 | 5.65679698  | 6.224771268 | 5.787548084 | 4.99377315  | 6.781259484 | 6.481402236 | 5.94285854  | 5.92658918  | 6.072461653 | 5.837396005 |
| SCAF1      | 5.402854282  | 5.828394926  | 5.808004727 | 5.588542592 | 6.052735553 | 5.611779623 | 5.520031409 | 5.865407366 | 5.661518584 | 5.816622556 | 5.798047958 | 5.084852253 | 5.838097682 | 5.846879906 | 5.705426117 | 5.76592327  | 5.60837201  | 5.612712753 |
| TMEM173    | 6.193184476  | 5.150524967  | 5.149036988 | 6.699119351 | 6.249418887 | 5.159380808 | 5.328296999 | 5.769017661 | 6.634530245 | 5.582000152 | 6.478346612 | 6.273847285 | 6.80112551  | 5.21579496  | 5.632517985 | 5.702441056 | 5.52591916  | 5.701023785 |
| EMLI       | 5.409932073  | 5.845638776  | 5.145213381 | 6.14030777  | 5.718753212 | 6.279577474 | 6.184432553 | 5.640625931 | 6.067019363 | 5.67922888  | 5.335792366 | 6.136451263 | 5.277564101 | 5.770130093 | 5.782912400 | 5.572355018 | 5.645081037 |             |
| RASGR4     | 5.736888313  | 5.687005289  | 5.675218284 | 5.61410355  | 5.71335897  | 5.756256682 | 5.738457187 | 5.569681483 | 5.794045851 | 5.606124975 | 5.683541349 | 5.736879186 | 5.800075142 | 5.838178547 | 5.555358418 | 5.65170396  | 5.765083075 | 5.721213983 |
| ARL11      | 5.211763003  | 5.521459723  | 5.173936151 | 5.764961036 | 5.97966739  | 5.98537691  | 5.567520259 | 5.667458229 | 5.98537691  | 5.567458229 | 5.610300064 | 6.019986871 | 5.204569748 | 5.888944516 | 5.387108574 | 5.701315688 | 5.149923133 |             |
| IFR181     | 6.825792976  | 5.5105708952 | 6.038964225 | 6.403432098 | 5.051646157 | 5.103875322 | 5.636895168 | 5.67640672  | 5.337091068 | 5.343706492 | 5.762619285 | 5.337091068 | 5.34511504  | 5.280446686 | 5.8392428   | 5.614838386 | 5.792555229 |             |
| SCUB1E     | 5.086762442  | 5.766087695  | 5.086762442 | 5.723206233 | 5.500889189 | 6.474476509 | 6.360970384 | 5.757013155 | 5.657944944 | 6.089676099 | 5.206438299 | 5.07097298  | 5.087139039 | 5.67174134  | 5.930478001 | 5.738226906 | 5.792150393 |             |
| DSE        | 6.120190271  | 6.41547705   | 6.41547705  | 6.755203143 | 5.66680304  | 5.307479533 | 5.477112463 | 5.891389866 | 5.72801794  | 6.002483996 | 5.418162422 | 5.6537609   | 5.304232824 | 5.539673423 | 5.899656957 | 5.508620022 | 5.477863831 |             |
| RHSD       | 5.774198592  | 6.362585573  | 5.10665059  | 5.24949233  | 5.86796784  | 5.053439168 | 5.052802094 | 5.557890881 | 6.025163273 | 5.916573437 | 5.356425966 | 5.857667702 | 6.282518707 | 6.080633313 | 5.55947328  | 5.742499214 | 5.452967703 | 5.650977299 |
| RHOD       | 5.894151829  | 5.968379934  | 5.968379934 | 5.5481389   | 5.671080586 | 5.637104407 | 5.539985458 | 5.839310475 | 5.918204909 | 5.678203400 | 5.890520999 | 5.719983014 | 6.298412251 | 5.19714399  | 5.467081599 | 5.32887411  | 5.59751236  | 6.102083474 |
| NECTN2     | 4.984683717  | 5.737718309  | 5.58403492  | 5.631640937 | 4.8827352   | 5.869979689 | 6.134312123 | 5.60855241  | 5.716572861 | 5.356471005 | 5.67266292  | 5.80065777  | 5.581545719 | 6.021289399 | 6.24796448  | 5.83967059  | 5.435342071 | 7.80533498  |
| RP11-4682E | 5.465620122  | 5.386459302  | 5.367482094 | 5.367482094 | 5.834021598 | 5.417940047 | 5.708022771 | 6.265453394 | 5.708022771 | 6.497446727 | 5.970749213 | 6.681104919 | 5.800736633 | 5.615658011 | 5.46021623  | 6.107332869 | 6.274203856 | 5.166777348 |
| ELOV16     | 6.311343713  | 5.065197399  | 5.050767477 | 5.405067612 | 4.894272147 | 4.909226398 | 4.895330375 | 6.327692052 | 5.66417718  | 5.725485989 | 5.668471936 | 4.912324907 | 6.843879346 | 4.975601952 | 5.980917355 | 6.198168801 | 6.035766142 | 5.852391126 |
| UBRN10     | 6.363724906  | 5.185155551  | 5.588126265 | 5.009102922 | 5.22014518  | 5.016800283 | 5.708740121 | 5.573054008 | 6.363724906 | 5.185155551 | 5.588126265 | 5.009102922 | 5.22014518  | 5.016800283 | 5.708740121 | 5.573054008 | 6.363724906 | 5.185155551 |
| RNF12      | 6.4861061792 | 7.083396781  | 5.379793941 | 6.86997991  | 5.66086264  | 5.003021292 | 6.001398549 | 5.524909615 | 5.90430715  | 5.386941916 | 5.67616555  | 5.079281705 | 6.363809263 | 6.342257373 | 5.554004273 | 5.873509471 | 5.55807977  | 5.521953484 |
| SLC4A5     | 5.642014796  | 5.742173175  | 5.386254059 | 5.63102444  | 5.577015804 | 5.498049507 | 6.065373339 | 6.079739364 | 5.642014796 | 5.742173175 | 5.386254059 | 5.63102444  | 5.577015804 | 5.498049507 | 6.065373339 | 6.079739364 | 5.642014796 | 5.742173175 |
| FCGP       | 4.738681327  | 4.727657587  | 4.727438007 | 5.272905999 | 5.639036044 | 5.615014312 | 6.641697316 | 6.027070648 | 5.741285438 | 5.741285438 | 6.027070648 | 5.741285438 | 5.741285438 | 6.027070648 | 5.741285438 | 6.027070648 | 5.741285438 | 5.741285438 |
| RP11-11M1M | 5.270568408  | 5.210080569  | 5.741572722 | 5.56579434  | 6.287843327 | 5.219379643 | 5.364065292 | 6.313660061 | 5.879361327 | 6.10269994  | 6.099798595 | 5.454464371 | 6.638971277 | 5.265112037 | 6.58790841  | 5.778258843 | 6.39114493  | 5.43039198  |
| ZWNF46     | 5.720835129  | 5.610405665  | 5.728607029 | 5.305430924 | 5.579020759 | 5.858664201 | 5.133155325 | 5.628035594 | 6.099767142 | 6.030241646 | 5.92787567  | 5.580934494 | 5.438553014 | 6.618481607 | 5.486401781 | 6.03894273  | 5.412102586 |             |
| TMN        | 6.170894474  | 5.68666453   | 6.527298528 | 5.627305101 | 5.029478    | 5.800478497 | 5.034703414 | 5.585206122 | 5.646306292 | 5.671887792 | 5.618887792 | 5.694486429 | 5.033081824 | 5.95205798  | 5.149101739 | 5.864941326 | 5.446402635 | 5.784066473 |
| MAPK319    | 5.748067382  | 5.888310757  | 5.700066643 | 5.675861559 | 6.035241934 | 5.636271856 | 5.654735648 | 5.434273319 | 5.959585361 | 5.630730924 | 5.630730924 | 5.630730924 | 5.630730924 | 5.630730924 | 5.630730924 | 5.630730924 | 5.630730924 | 5.630730924 |
| ZWNF48     | 6.795026154  | 5.106135055  | 6.2612026   | 5.211990379 | 4.984978355 | 5.949520956 | 5.72466119  | 5.548660661 | 5.935728519 | 5.936229838 | 5.503332327 | 5.083956122 | 5.105421168 | 5.492237539 | 5.652968972 | 5.744447741 | 6.109956117 |             |
| ZWNF12A    | 6.382524638  | 5.154209878  | 5.685234538 | 5.154209878 | 5.685234538 | 5.154209878 | 5.685234538 | 5.154209878 | 5.685234538 | 5.154209878 | 5.685234538 | 5.154209878 | 5.685234538 | 5.154209878 | 5.685234538 | 5.154209878 | 5.685234538 | 5.154209878 |
| ANKLE1     | 6.071070422  | 5.408622356  | 5.375021081 | 5.988467993 | 5.80030522  | 5.37243929  | 5.806313651 | 5.566527582 | 5.845495414 | 5.936821192 | 5.677050327 | 5.483593622 | 5.483593622 | 5.483593622 | 5.483593622 | 5.483593622 | 5.483593622 | 5.483593622 |
| MICAL2     | 6.276923129  | 5.306892796  | 4.914894004 | 6.430421185 | 6.432849357 | 5.262893557 | 4.947050372 | 6.013720026 | 5.658217295 | 6.103187723 | 5.689388191 | 6.151896542 | 4.944302682 | 4.951851747 | 6.37879561  | 6.090013767 | 5.682872918 | 7.196557964 |
| HE51       | 5.270006488  | 6.838030378  | 6.553729701 | 6.95428765  | 6.090639327 | 7.054821642 | 6.018296682 | 5.671418304 | 6.698893954 | 5.671418304 | 6.698893954 | 5.671418304 | 6.698893954 | 5.671418304 | 6.698893954 | 5.671418304 | 6.698893954 | 5.671418304 |
| RP11-16682 | 6.109904878  | 5.73142574   | 5.646967524 | 5.808876735 | 6.626251165 | 5.299483609 | 5.50673968  | 5.962877566 | 5.657676567 | 6.446894706 | 5.711315388 | 6.603101161 | 5.44609768  | 5.589496161 | 6.713168479 | 5.877728555 | 6.390927229 | 5.611256602 |
| USP35      | 6.061881372  | 5.908297322  | 5.358957783 | 5.508450047 | 5.188677218 | 5.508396539 | 6.064816533 | 5.951885241 | 5.508396539 | 6.064816533 | 5.951885241 | 5.508396539 | 6.064816533 | 5.951885241 | 5.508396539 | 6.064816533 | 5.951885241 | 5.508396539 |
| SULT1B1    | 5.523981493  | 5.364048335  | 5.763427056 | 5.811392211 | 5.429345696 | 5.464352536 | 5.398323543 | 6.341719818 | 5.404388784 | 6.221538142 | 5.899425156 | 5.405169789 | 6.02961222  | 5.573012268 | 6.102086996 | 5.8564467   | 5.711762797 | 7.075480225 |
| AC0C3      | 6.342594849  | 5.389964746  | 5.389964746 | 5.389964746 | 5.389964746 | 5.389964746 | 5.389964746 | 5.389964746 | 5.389964746 | 5.389964746 | 5.389964746 | 5.389964746 | 5.389964746 | 5.389964746 | 5.389964746 | 5.389964746 | 5.389964746 | 5.389964746 |
| CHIT1      | 6.654816093  | 6.654816093  | 6.654816093 | 6.654816093 | 6.654816093 | 6.654816093 | 6.654816093 | 6.654816093 | 6.654816093 | 6.654816093 | 6.654816093 | 6.654816093 | 6.654816093 | 6.654816093 | 6.654816093 | 6.654816093 | 6.654816093 | 6.654816093 |
| PCDCL2     | 5.88206895   | 4.982605717  | 4.982551356 | 6.003804702 | 6.164851467 | 4.98609064  | 6.073346666 | 5.679148805 | 5.941411809 | 5.74951176  | 5.62232771  | 4.983842931 | 5.881373981 | 4.988183649 | 5.659988955 | 5.30608654  | 5.623736972 | 5.70517792  |
| ZNF155     | 6.327214112  | 4.930583642  | 4.930510852 | 6.03941137  | 6.75944606  | 6.052357438 | 6.281357852 | 5.660218198 | 6.052357438 | 6.281357852 | 5.660218198 | 6.052357438 | 6.281357852 | 5.660218198 | 6.052357438 | 6.281357852 | 5.660218198 | 6.052357438 |
| RASSF3     | 5.599071366  | 5.284908385  | 5.808091952 | 5.938974393 | 5.422632609 | 5.868586401 | 5.728551872 | 5.717551774 | 5.717551774 | 5.717551774 | 5.32142538  | 5.431325298 | 6.270852611 | 5.837523337 | 6.118406134 | 5.550525202 | 5.865581118 | 5.64566312  |
| CTD-307407 | 5.728718917  | 6.086890737  | 5.688646357 | 6.086890737 | 5.688646357 | 6.086890737 | 5.688646357 | 6.086890737 | 5.688646357 | 6.086890737 | 5.688646357 | 6.086890737 | 5.688646357 | 6.086890737 | 5.688646357 | 6.086890737 | 5.688646357 | 6.086890737 |
| BIVM-ERCC5 | 5.318341643  | 5.275360305  | 5.67566232  | 5.665316049 | 5.797394676 | 6.695176546 | 5.323513644 | 5.318341643 | 5.275360305 | 5.67566232  | 5.665316049 | 5.797394676 | 6.695176546 | 5.323513644 | 5.318341643 | 5.275360305 | 5.67566232  | 5.665316049 |
| EPHK1      | 5.441571762  | 5.951437747  | 5.806648627 | 5.886401297 | 6.070627399 | 6.220911386 | 5.961904152 | 5.667264316 | 5.497527367 | 5.450457393 |             |             |             |             |             |             |             |             |

|            |             |             |             |             |              |             |             |             |             |             |             |             |             |             |             |             |             |             |
|------------|-------------|-------------|-------------|-------------|--------------|-------------|-------------|-------------|-------------|-------------|-------------|-------------|-------------|-------------|-------------|-------------|-------------|-------------|
| KCTD9      | 5.310349133 | 5.014498083 | 5.286312595 | 6.161357253 | 5.012181232  | 6.153178433 | 5.322106406 | 5.55676305  | 5.217604352 | 5.619232122 | 5.715480109 | 5.790593927 | 6.093793737 | 5.161647556 | 5.901640438 | 5.649538943 | 6.037629885 | 6.437327449 |
| ZNF517     | 5.563484935 | 5.754653234 | 5.603485366 | 5.178775062 | 5.124207754  | 6.158807265 | 5.49799728  | 5.704928876 | 5.849811178 | 5.743117803 | 5.509023363 | 5.471842976 | 5.228590806 | 6.067140458 | 5.322733301 | 5.505863962 | 5.711285815 | 6.106453704 |
| HST13H3E   | 5.982673151 | 5.189226265 | 5.038242324 | 5.699100062 | 5.242879551  | 5.200771542 | 5.073961172 | 5.809269333 | 5.667526743 | 5.695332156 | 5.514551888 | 5.121705582 | 5.052666028 | 6.753889947 | 5.600260678 | 5.897457438 | 5.858216921 | 5.584859805 |
| TRIM14     | 6.166438488 | 5.311021866 | 5.649251581 | 5.164942156 | 6.089152674  | 5.226470223 | 5.707788272 | 5.935109689 | 5.908862966 | 5.481134347 | 5.55872887  | 6.412735456 | 5.38625077  | 5.513892566 | 5.888019614 | 6.180337193 | 5.399674637 | 6.641569475 |
| CDY39      | 5.723457115 | 5.731278933 | 5.631568733 | 5.620367618 | 5.414547778  | 5.232076218 | 5.251076318 | 5.703160994 | 5.686223919 | 5.686223919 | 5.693408219 | 5.21537041  | 5.295180475 | 5.305954401 | 5.320176793 | 5.272456167 | 5.351599383 | 5.487166244 |
| Clorf167   | 5.637766021 | 5.620742257 | 5.640552429 | 5.256051524 | 5.20345266   | 6.204170270 | 5.256754812 | 5.737236198 | 5.870246631 | 5.737236198 | 5.817651017 | 5.485294316 | 5.292465508 | 5.257006617 | 5.642039036 | 5.600922987 | 5.638872089 | 5.638872089 |
| GPX3       | 6.041132323 | 5.758190652 | 5.809396717 | 4.908472583 | 4.913644040  | 5.626963004 | 4.919265018 | 5.96324990  | 5.707758484 | 5.567409246 | 5.607178551 | 6.541765998 | 4.917771148 | 4.922874902 | 6.34163915  | 5.63885806  | 5.029907635 | 5.517490831 |
| GDOP91     | 5.320529294 | 5.142172924 | 5.334449733 | 5.692520259 | 5.1752102095 | 5.506046804 | 5.752702301 | 5.544293752 | 5.564671552 | 5.685171358 | 5.82496286  | 6.006683215 | 5.750935552 | 5.437128652 | 5.778417038 | 5.735939982 | 5.518966446 | 5.518966446 |
| MMT        | 5.622806743 | 5.433513538 | 5.234597633 | 5.239291881 | 5.474039944  | 5.057462242 | 5.958874828 | 5.679435805 | 5.601695449 | 5.903283401 | 5.66617056  | 5.159929721 | 5.638434286 | 5.195766544 | 5.627169012 | 5.971584862 | 5.922732328 | 5.705756545 |
| MTCP1      | 5.598456697 | 5.828286063 | 5.852626263 | 5.774705739 | 5.234691165  | 6.337403263 | 6.088796765 | 5.359774503 | 5.665863328 | 5.364842181 | 5.452644467 | 6.062181311 | 5.919279809 | 5.244622446 | 5.433906052 | 5.789380345 | 5.952103334 | 5.291214981 |
| ZNF9323    | 5.797384147 | 5.300235618 | 5.624464023 | 5.694439945 | 5.527708068  | 5.457731096 | 5.635110673 | 5.461331971 | 6.399504435 | 5.965103663 | 5.780796115 | 5.267152714 | 5.530098227 | 5.598639227 | 5.335594927 | 5.888032192 | 5.866733371 | 5.935594927 |
| LSM129     | 5.935357538 | 5.265378688 | 5.754069911 | 6.232421943 | 5.870291282  | 5.988089491 | 5.501617567 | 5.47006271  | 5.17772814  | 5.963958647 | 5.780080653 | 6.38326126  | 5.983826256 | 5.257012815 | 5.753191611 | 5.465812765 | 5.508865514 | 5.294826469 |
| SNK3       | 5.29913689  | 5.049554001 | 5.658590513 | 5.047623256 | 5.032010904  | 6.488724648 | 5.884654563 | 5.798328004 | 5.640649405 | 5.619879873 | 5.050926143 | 5.490329993 | 5.990205688 | 5.620935976 | 6.004137887 | 6.128838481 | 5.620935976 | 6.004137887 |
| CTCL       | 5.664088791 | 5.624864372 | 5.592800029 | 5.567543491 | 5.528498254  | 5.614921979 | 5.618913334 | 5.897195131 | 5.369342749 | 5.850357525 | 5.959699254 | 5.629054437 | 5.697644    | 5.745536372 | 5.714065855 | 6.639514952 | 5.811103353 | 5.985363434 |
| NOO1       | 5.181931966 | 5.003540113 | 5.003502953 | 6.279325262 | 5.139938884  | 5.818112976 | 6.415388157 | 5.868678088 | 5.859330793 | 5.805873082 | 5.955387517 | 5.370063617 | 5.179376268 | 5.008803468 | 5.870074394 | 5.534672483 | 5.644363403 | 5.644363403 |
| SP1B       | 5.122127647 | 5.28107982  | 5.07611528  | 5.243455651 | 5.140023158  | 6.627382823 | 5.173490435 | 6.04077603  | 5.714892461 | 5.749306404 | 5.972994929 | 5.083248643 | 5.730950642 | 6.002112032 | 6.421631195 | 5.18202386  | 5.620232554 | 5.620232554 |
| HEAT8E     | 5.256548602 | 5.359486136 | 6.230539807 | 5.057035065 | 5.166125721  | 5.799239161 | 5.551563238 | 5.774640497 | 5.654880161 | 5.18381506  | 5.603847057 | 5.009155151 | 5.739808334 | 5.753212059 | 5.993068606 | 5.51879851  | 5.51879851  | 5.51879851  |
| IC1A       | 5.028635408 | 5.081504365 | 5.081504365 | 6.590772417 | 5.105748621  | 6.517320084 | 4.983989083 | 5.743257912 | 6.048646631 | 5.529352089 | 5.856840743 | 6.009700587 | 5.071309109 | 5.098206084 | 6.029637011 | 5.716010551 | 5.312919324 | 6.454895911 |
| ARL15      | 6.175831818 | 5.234593957 | 4.910275918 | 4.915233954 | 5.175912748  | 4.921166403 | 5.522053697 | 6.052702498 | 5.789474646 | 5.41974088  | 5.914061375 | 4.960967268 | 6.319470952 | 5.098087691 | 5.752915065 | 5.72190905  | 5.72190905  | 5.72190905  |
| SCN9A      | 5.326031552 | 6.100649341 | 5.011648809 | 5.669757415 | 5.241155276  | 5.272232712 | 6.210776713 | 6.435522819 | 5.986218159 | 5.73737881  | 5.67722562  | 5.01316113  | 6.459501031 | 5.739047174 | 5.816370609 | 5.065658382 | 5.766971931 | 5.888150452 |
| CD302      | 5.826878815 | 5.363485056 | 5.423874833 | 5.396752071 | 5.396752071  | 5.396752071 | 5.664401747 | 5.664401747 | 5.964487058 | 5.964487058 | 5.964487058 | 5.964487058 | 5.964487058 | 5.964487058 | 5.964487058 | 5.964487058 | 5.964487058 | 5.964487058 |
| RNASEK-CL7 | 5.532570139 | 5.679497172 | 5.377308947 | 5.342559071 | 5.87464649   | 6.524531757 | 5.609215679 | 6.543992349 | 5.638831872 | 5.569486049 | 5.674712565 | 5.449298061 | 5.991461319 | 5.991461319 | 5.816679121 | 5.876142714 | 5.578119876 | 5.980679741 |
| AC142212.1 | 5.691417529 | 5.191938125 | 5.550903787 | 5.74781003  | 6.093821375  | 5.37307885  | 6.011974276 | 5.313721175 | 6.070996121 | 5.25912461  | 5.4685203   | 6.082800439 | 5.704200407 | 6.144534106 | 5.476116697 | 6.04840245  | 5.341651231 | 5.275483664 |
| DDX31      | 5.004969727 | 6.629689724 | 5.103174693 | 5.65675032  | 5.487153049  | 5.465694723 | 5.314614159 | 5.975705648 | 5.795910144 | 5.860889007 | 5.618888155 | 5.616956713 | 5.003154701 | 5.7202491   | 5.826123408 | 6.528002722 | 6.138482879 | 5.97050944  |
| CEP112     | 5.618211016 | 5.187245604 | 6.040267969 | 5.08244871  | 5.183136889  | 5.111065678 | 5.722770254 | 5.611701704 | 5.59459947  | 5.814276217 | 5.100116436 | 5.151008392 | 5.129981157 | 5.735404987 | 5.880781853 | 5.582761743 | 5.486801774 | 5.486801774 |
| SAMD0A     | 5.304719113 | 5.205224094 | 5.284519448 | 5.241790191 | 5.197615219  | 5.155725068 | 5.854171079 | 5.798598444 | 5.626290614 | 5.905815008 | 5.90683086  | 5.256668463 | 5.738489316 | 5.570229447 | 5.791079738 | 5.607582959 | 5.510403966 | 5.801221274 |
| TMEM2      | 5.205913011 | 4.995235452 | 4.995242888 | 6.151922081 | 5.203631566  | 5.441215094 | 6.399092096 | 6.350970763 | 5.904720851 | 5.865069187 | 5.92772836  | 4.997207214 | 5.428058034 | 5.453133016 | 6.766787572 | 5.501272725 | 5.277619959 | 5.567789281 |
| CDY39      | 5.450766021 | 5.450766021 | 5.450766021 | 5.450766021 | 5.450766021  | 5.450766021 | 5.450766021 | 5.450766021 | 5.450766021 | 5.450766021 | 5.450766021 | 5.450766021 | 5.450766021 | 5.450766021 | 5.450766021 | 5.450766021 | 5.450766021 | 5.450766021 |
| CBX8       | 5.904620915 | 5.172461154 | 5.974740093 | 5.868328680 | 5.127461375  | 5.521351518 | 5.693207636 | 5.606580871 | 5.847684648 | 5.847684648 | 5.847684648 | 5.847684648 | 5.847684648 | 5.847684648 | 5.847684648 | 5.847684648 | 5.847684648 | 5.847684648 |
| KNB1       | 5.566358814 | 5.460205902 | 5.57889347  | 5.553459497 | 5.63475847   | 5.507112882 | 6.650381096 | 6.159438541 | 5.534530212 | 6.060763582 | 5.509457331 | 5.604183704 | 5.519531196 | 5.662025313 | 5.779735282 | 6.618546988 | 5.855872097 | 5.62390647  |
| FNK3       | 5.805107947 | 5.69427302  | 5.842848578 | 5.514766849 | 5.514766849  | 5.514766849 | 5.514766849 | 5.514766849 | 5.514766849 | 5.514766849 | 5.514766849 | 5.514766849 | 5.514766849 | 5.514766849 | 5.514766849 | 5.514766849 | 5.514766849 | 5.514766849 |
| FO38577.0A | 5.857265406 | 5.693553327 | 5.58703478  | 5.415627472 | 5.758341072  | 5.911714529 | 5.489090874 | 5.575562006 | 5.424430555 | 6.62800198  | 5.528329865 | 5.461852156 | 5.955781758 | 5.629345753 | 5.407539484 | 5.411036703 | 5.699880278 | 5.635469042 |
| TMEM39B    | 5.50793067  | 5.41054646  | 5.809185934 | 5.41054646  | 5.50793067   | 5.50793067  | 5.50793067  | 5.50793067  | 5.50793067  | 5.50793067  | 5.50793067  | 5.50793067  | 5.50793067  | 5.50793067  | 5.50793067  | 5.50793067  | 5.50793067  | 5.50793067  |
| HGF        | 4.867018308 | 4.863431256 | 4.863431256 | 4.863431256 | 4.863431256  | 4.863431256 | 4.863431256 | 4.863431256 | 4.863431256 | 4.863431256 | 4.863431256 | 4.863431256 | 4.863431256 | 4.863431256 | 4.863431256 | 4.863431256 | 4.863431256 | 4.863431256 |
| RP15-54PB  | 5.151819468 | 5.151819468 | 5.151819468 | 5.151819468 | 5.151819468  | 5.151819468 | 5.151819468 | 5.151819468 | 5.151819468 | 5.151819468 | 5.151819468 | 5.151819468 | 5.151819468 | 5.151819468 | 5.151819468 | 5.151819468 | 5.151819468 | 5.151819468 |
| TRIM22     | 5.42819601  | 5.42819601  | 5.42819601  | 5.42819601  | 5.42819601   | 5.42819601  | 5.42819601  | 5.42819601  | 5.42819601  | 5.42819601  | 5.42819601  | 5.42819601  | 5.42819601  | 5.42819601  | 5.42819601  | 5.42819601  | 5.42819601  | 5.42819601  |
| APB81      | 5.705427590 | 4.895956859 | 4.895903755 | 4.889703822 | 6.242868975  | 4.893605155 | 4.898756638 | 5.481155034 | 5.597032088 | 5.63321348  | 5.76088661  | 5.880495475 | 4.897247166 | 6.090026758 | 5.75704817  | 5.609931004 | 5.547104547 | 5.738045965 |
| KU1K1      | 5.250157009 | 5.638059821 | 5.135045799 | 5.638059821 | 5.135045799  | 5.638059821 | 5.135045799 | 5.638059821 | 5.135045799 | 5.638059821 | 5.135045799 | 5.638059821 | 5.135045799 | 5.638059821 | 5.135045799 | 5.638059821 | 5.135045799 | 5.638059821 |
| METAP1D    | 5.625213652 | 5.873749559 | 4.928055964 | 4.92233154  | 5.018223101  | 5.559039885 | 5.10745899  | 5.584409438 | 5.92980953  | 5.79412552  | 5.60153811  | 6.224203386 | 4.929297421 | 5.603754733 | 5.461939984 | 6.620482793 | 5.676812134 | 5.645633916 |
| RP11-717K1 | 5.326103657 | 5.326103657 | 5.326103657 | 5.326103657 | 5.326103657  | 5.326103657 | 5.326103657 | 5.326103657 | 5.326103657 | 5.326103657 | 5.326103657 | 5.326103657 | 5.326103657 | 5.326103657 | 5.326103657 | 5.326103657 | 5.326103657 | 5.326103657 |
| PK3CD      | 5.327709032 | 5.607158719 | 5.357199598 | 5.607158719 | 5.357199598  | 5.607158719 | 5.357199598 | 5.607158719 | 5.357199598 | 5.607158719 | 5.357199598 | 5.607158719 | 5.357199598 | 5.607158719 | 5.357199598 | 5.607158719 | 5.357199598 | 5.607158719 |
| C7orf25    | 6.277275012 | 5.48546028  | 5.6219676   |             |              |             |             |             |             |             |             |             |             |             |             |             |             |             |



|            |             |             |             |             |             |             |             |             |             |             |             |             |             |             |             |             |             |             |
|------------|-------------|-------------|-------------|-------------|-------------|-------------|-------------|-------------|-------------|-------------|-------------|-------------|-------------|-------------|-------------|-------------|-------------|-------------|
| DNAL4      | 5.908756217 | 5.422115451 | 5.76975081  | 5.24545858  | 5.91846692  | 5.726581926 | 6.00501098  | 5.35993235  | 5.803577668 | 5.93720905  | 5.212587813 | 5.77934474  | 5.042402685 | 5.62531012  | 5.550814353 | 5.572267622 | 5.471749385 | 5.468515659 |
| TMEM79     | 6.065888408 | 5.839037568 | 5.209848548 | 5.565231003 | 5.23099172  | 5.03956899  | 5.534349811 | 5.620055949 | 5.159732662 | 5.57061085  | 5.55780013  | 5.25866027  | 5.030038049 | 5.922187578 | 5.576641362 | 5.484013271 | 5.567969731 | 5.561921551 |
| Cbor44-SGK | 5.56760176  | 5.596276514 | 5.20274032  | 5.730653953 | 5.508392683 | 5.092524862 | 5.092524862 | 5.092524862 | 5.092524862 | 5.092524862 | 5.092524862 | 5.092524862 | 5.092524862 | 5.092524862 | 5.092524862 | 5.092524862 | 5.092524862 | 5.092524862 |
| KIR3D31    | 5.570323506 | 5.523709283 | 5.533743721 | 5.468169385 | 5.496221912 | 5.523081421 | 5.557952459 | 5.997833728 | 6.031048966 | 5.883856993 | 5.645041033 | 5.558963655 | 5.538616681 | 5.588939844 | 5.480921414 | 5.661526144 | 6.152272506 | 5.604249464 |
| TKH1       | 5.72779859  | 5.354709591 | 5.354709591 | 5.354709591 | 5.354709591 | 5.354709591 | 5.354709591 | 5.354709591 | 5.354709591 | 5.354709591 | 5.354709591 | 5.354709591 | 5.354709591 | 5.354709591 | 5.354709591 | 5.354709591 | 5.354709591 | 5.354709591 |
| TPX2       | 5.760065563 | 5.773930311 | 4.806504868 | 5.668687228 | 5.125971902 | 4.932124136 | 4.932124136 | 4.932124136 | 4.932124136 | 4.932124136 | 4.932124136 | 4.932124136 | 4.932124136 | 4.932124136 | 4.932124136 | 4.932124136 | 4.932124136 | 4.932124136 |
| ZCPC41     | 5.718465009 | 4.976878981 | 5.778047178 | 5.563475797 | 4.975257588 | 6.056745666 | 5.602243202 | 5.15885776  | 5.607457705 | 5.53074161  | 5.548338557 | 5.343499965 | 4.977895443 | 5.382117109 | 5.465056598 | 5.632722835 | 5.098613040 | 5.657213444 |
| ANPEP      | 3.714269948 | 4.639090904 | 5.929010032 | 5.712309496 | 5.019570583 | 5.469342337 | 3.748274866 | 5.469342337 | 6.021088497 | 5.00841311  | 5.687268773 | 5.726999616 | 5.93075584  | 3.791069344 | 6.088167852 | 6.862625988 | 5.614848352 | 5.691944263 |
| RNF219     | 4.9033419   | 5.00540357  | 6.873576431 | 5.207909441 | 5.546717511 | 4.902440437 | 6.210285934 | 5.154511945 | 5.861350639 | 5.620460481 | 5.716994023 | 5.930252029 | 4.901515293 | 5.723290365 | 5.527180798 | 5.563846566 | 5.767145365 | 5.34583051  |
| COLL1A     | 5.553896478 | 5.504818365 | 5.504818365 | 5.504818365 | 5.504818365 | 5.504818365 | 5.504818365 | 5.504818365 | 5.504818365 | 5.504818365 | 5.504818365 | 5.504818365 | 5.504818365 | 5.504818365 | 5.504818365 | 5.504818365 | 5.504818365 | 5.504818365 |
| ZNF252     | 5.56103344  | 5.524602164 | 5.524602164 | 5.524602164 | 5.524602164 | 5.524602164 | 5.524602164 | 5.524602164 | 5.524602164 | 5.524602164 | 5.524602164 | 5.524602164 | 5.524602164 | 5.524602164 | 5.524602164 | 5.524602164 | 5.524602164 | 5.524602164 |
| MARVELD1   | 5.512582054 | 6.001795755 | 5.233781191 | 6.146561543 | 5.770087324 | 5.009380545 | 4.384701703 | 5.497404196 | 5.697535928 | 5.659690121 | 5.566457527 | 5.54207067  | 6.156913703 | 5.031791827 | 5.744061672 | 5.58318526  | 5.456780284 | 5.444262628 |
| ENPP2      | 4.870714153 | 6.628740601 | 4.806031401 | 4.26808904  | 4.806031401 | 4.806031401 | 4.806031401 | 4.806031401 | 4.806031401 | 4.806031401 | 4.806031401 | 4.806031401 | 4.806031401 | 4.806031401 | 4.806031401 | 4.806031401 | 4.806031401 | 4.806031401 |
| PWP2       | 5.53696898  | 5.581782255 | 5.238257822 | 5.889418759 | 5.087107173 | 5.426588236 | 6.237570215 | 5.68992444  | 5.484033952 | 5.954523149 | 5.46293003  | 5.386884897 | 5.35128305  | 5.063518485 | 5.65574707  | 6.69568543  | 5.604721366 | 5.32869505  |
| TEN1-CD33  | 5.65437529  | 5.60353772  | 5.60353772  | 5.60353772  | 5.60353772  | 5.60353772  | 5.60353772  | 5.60353772  | 5.60353772  | 5.60353772  | 5.60353772  | 5.60353772  | 5.60353772  | 5.60353772  | 5.60353772  | 5.60353772  | 5.60353772  | 5.60353772  |
| PTCH2      | 5.556326594 | 5.773000166 | 5.809854145 | 5.631447475 | 5.381065575 | 5.56427943  | 5.50304632  | 5.547672949 | 5.297722261 | 5.47640848  | 5.399034668 | 5.781626016 | 5.524042754 | 5.560280228 | 5.358258883 | 5.330513844 | 5.812605159 | 5.647633644 |
| LRR3C7A3   | 6.252366095 | 5.501132476 | 5.39135661  | 5.531069085 | 5.568384986 | 5.551562033 | 5.530440976 | 5.647251169 | 5.547526364 | 5.656836588 | 5.63887596  | 5.425201034 | 5.572992832 | 5.466570664 | 5.843741894 | 5.843741894 | 5.843741894 | 5.843741894 |
| NIPAL4     | 5.083995671 | 4.979843883 | 5.63303046  | 4.955340624 | 5.10043242  | 5.16047526  | 5.16047526  | 5.16047526  | 5.16047526  | 5.16047526  | 5.16047526  | 5.16047526  | 5.16047526  | 5.16047526  | 5.16047526  | 5.16047526  | 5.16047526  | 5.16047526  |
| ZGRF1      | 5.267352126 | 5.060766673 | 5.110728662 | 5.111776572 | 5.98659783  | 5.130731233 | 6.225735614 | 5.470489525 | 5.663712977 | 5.676835287 | 5.676835287 | 5.676835287 | 5.676835287 | 5.676835287 | 5.676835287 | 5.676835287 | 5.676835287 | 5.676835287 |
| FAH2       | 5.514673616 | 5.938590428 | 5.914178216 | 5.463489745 | 5.710789406 | 5.636383712 | 5.897460561 | 5.232388997 | 6.020740575 | 5.232388997 | 5.232388997 | 5.232388997 | 5.232388997 | 5.232388997 | 5.232388997 | 5.232388997 | 5.232388997 | 5.232388997 |
| NORN2      | 5.575560974 | 5.015530234 | 5.509974717 | 5.844532612 | 5.02660354  | 5.02660354  | 5.02660354  | 5.02660354  | 5.02660354  | 5.02660354  | 5.02660354  | 5.02660354  | 5.02660354  | 5.02660354  | 5.02660354  | 5.02660354  | 5.02660354  | 5.02660354  |
| GRP35      | 4.938729976 | 5.083636946 | 4.718204854 | 5.083636946 | 4.897849591 | 4.855032418 | 6.064386401 | 5.680517249 | 4.479503627 | 5.881082111 | 5.27536504  | 5.607193194 | 4.29311855  | 5.923252537 | 6.004023207 | 5.39340464  | 5.612120749 | 5.612120749 |
| PHYH1      | 4.992376297 | 5.054149008 | 5.041282867 | 5.108748028 | 5.99333518  | 5.2858607   | 5.092364782 | 5.965287916 | 5.558322297 | 5.531107876 | 5.24830441  | 6.070932527 | 5.580291774 | 6.391423614 | 5.776324281 | 6.604934857 | 5.67169775  | 5.239035723 |
| ZCWPW1     | 5.555313978 | 5.808365364 | 5.967795032 | 5.106494004 | 5.002590027 | 4.974886943 | 5.841390539 | 5.563230082 | 5.372273494 | 5.67594841  | 5.449956446 | 4.972966873 | 5.474686823 | 6.07420454  | 5.64293653  | 5.818407037 | 5.52609429  | 5.432437098 |
| ADO        | 5.942393959 | 5.101125944 | 5.626627469 | 5.562667249 | 5.613811309 | 5.66027366  | 5.132597567 | 5.559342823 | 5.941528368 | 5.567016466 | 5.51576865  | 6.13134424  | 5.188141195 | 5.016036934 | 5.319454523 | 5.552673075 | 5.513331478 | 5.462839631 |
| SICZARG    | 5.493919053 | 5.568307084 | 5.559708626 | 5.935901216 | 5.379576389 | 5.633820812 | 5.461419094 | 5.519441977 | 5.603761198 | 5.602370421 | 5.617985273 | 5.515753076 | 5.839219566 | 5.438188645 | 5.403762328 | 5.56689328  | 5.306843255 | 5.306843255 |
| RHEB1      | 4.927461958 | 4.924571281 | 5.688924297 | 5.937984935 | 5.513086409 | 4.928423329 | 6.244919965 | 5.652510288 | 5.683957437 | 5.40522635  | 5.879040386 | 5.410127218 | 6.643615014 | 4.930751334 | 5.730027584 | 5.388381781 | 5.565829949 | 5.674821531 |
| FKBP       | 5.657360866 | 6.165713846 | 5.657360866 | 5.657360866 | 5.657360866 | 5.657360866 | 5.657360866 | 5.657360866 | 5.657360866 | 5.657360866 | 5.657360866 | 5.657360866 | 5.657360866 | 5.657360866 | 5.657360866 | 5.657360866 | 5.657360866 | 5.657360866 |
| PCAR       | 5.706661958 | 5.502777009 | 5.47081691  | 5.502777009 | 5.433139453 | 5.541697795 | 5.677085773 | 5.427885168 | 5.366402711 | 5.55301723  | 5.613955242 | 5.110212815 | 5.687521118 | 5.546528065 | 5.475622688 | 5.52068669  | 5.622018892 | 5.47329744  |
| BSB12      | 4.917929876 | 6.784123886 | 6.887453725 | 6.053303307 | 6.871973456 | 6.09858388  | 4.81101596  | 5.347959751 | 5.91728391  | 5.25294203  | 5.795743572 | 5.228947446 | 4.915329777 | 5.142269303 | 5.210005951 | 5.68448058  | 5.920593210 | 5.39270906  |
| NIPAL1     | 5.56235311  | 4.90011894  | 5.692568301 | 6.034802607 | 5.710626047 | 4.989474464 | 5.501140065 | 6.043802608 | 5.758132191 | 5.49180404  | 6.963532088 | 4.897783274 | 5.711647468 | 5.690154361 | 5.243154316 | 5.512520218 | 5.468512159 | 5.468512159 |
| GGCAT      | 5.120057789 | 5.227865314 | 6.192087673 | 5.403230435 | 5.399302301 | 5.472608943 | 5.535121353 | 5.404216597 | 5.602593991 | 5.864537711 | 6.262350011 | 6.215224985 | 5.21389125  | 5.128582012 | 5.449683333 | 5.39404883  | 5.901170004 | 5.784182287 |
| ZNF788     | 5.469390902 | 5.829238185 | 5.405003708 | 5.321352182 | 5.377511354 | 5.444232809 | 5.465801704 | 5.613227824 | 5.413813366 | 5.613227824 | 5.613227824 | 5.613227824 | 5.613227824 | 5.613227824 | 5.613227824 | 5.613227824 | 5.613227824 | 5.613227824 |
| KIAA1324L  | 6.348850958 | 4.921988855 | 4.921988855 | 4.921988855 | 4.921988855 | 4.921988855 | 4.921988855 | 4.921988855 | 4.921988855 | 4.921988855 | 4.921988855 | 4.921988855 | 4.921988855 | 4.921988855 | 4.921988855 | 4.921988855 | 4.921988855 | 4.921988855 |
| KATNAL1    | 5.00331796  | 5.008417264 | 5.008417264 | 5.008417264 | 5.008417264 | 5.008417264 | 5.008417264 | 5.008417264 | 5.008417264 | 5.008417264 | 5.008417264 | 5.008417264 | 5.008417264 | 5.008417264 | 5.008417264 | 5.008417264 | 5.008417264 | 5.008417264 |
| SCN11      | 5.246804054 | 5.848606034 | 5.848606034 | 5.848606034 | 5.848606034 | 5.848606034 | 5.848606034 | 5.848606034 | 5.848606034 | 5.848606034 | 5.848606034 | 5.848606034 | 5.848606034 | 5.848606034 | 5.848606034 | 5.848606034 | 5.848606034 | 5.848606034 |
| TMEM212    | 5.558765204 | 5.351739406 | 5.226577807 | 5.460471884 | 5.51988824  | 5.21176506  | 5.346859828 | 6.10186551  | 5.523379391 | 6.09217261  | 5.59261941  | 5.302999332 | 5.54231794  | 5.54340848  | 5.877370881 | 5.821146264 | 5.173931415 | 5.67889185  |
| KCNMB3     | 5.097682406 | 5.084845602 | 5.084845602 | 5.084845602 | 5.084845602 | 5.084845602 | 5.084845602 | 5.084845602 | 5.084845602 | 5.084845602 | 5.084845602 | 5.084845602 | 5.084845602 | 5.084845602 | 5.084845602 | 5.084845602 | 5.084845602 | 5.084845602 |
| WDTCL      | 5.613875551 | 5.438856925 | 5.603939207 | 5.514250325 | 5.89745914  | 5.531507309 | 5.646082898 | 5.540004949 | 5.422309994 | 5.646917372 | 5.531252097 | 5.475764305 | 5.442240189 | 5.934341124 | 5.477497679 | 5.415094142 | 5.743862892 | 5.531309928 |
| RP11-437B1 | 5.276829098 | 5.178219399 | 5.665466945 | 5.625065517 | 5.37261624  | 5.30854093  | 5.184291558 | 5.495887276 | 5.868032709 | 5.179341173 | 5.544956288 | 6.058510049 | 5.986168401 | 5.750509841 | 5.924100054 | 5.924100054 | 5.924100054 | 5.924100054 |
| BCAS1      | 6.239093608 | 5.108960828 | 5.183756796 | 5.110741192 | 5.097557461 | 5.178416532 | 5.15173906  | 5.6048959   | 5.312416099 | 5.580888648 | 5.481309969 | 6.077518128 | 5.024357357 | 5.17490516  | 6.23882405  | 6.138320486 | 5.665647809 | 6.47709884  |
| EMP2A      | 5.406282962 | 5.045962832 | 6.227857966 | 4.99800725  | 5.617952061 | 5.641212562 | 4.9583599   |             |             |             |             |             |             |             |             |             |             |             |

|             |             |             |              |             |             |             |             |             |             |             |             |             |             |             |             |             |             |             |
|-------------|-------------|-------------|--------------|-------------|-------------|-------------|-------------|-------------|-------------|-------------|-------------|-------------|-------------|-------------|-------------|-------------|-------------|-------------|
| KIAA1456    | 5.395491898 | 5.478765257 | 5.597389775  | 5.3919342   | 5.377826592 | 5.412148536 | 5.390937142 | 5.512982879 | 5.303845451 | 5.545127341 | 5.464656644 | 5.427550237 | 5.657427752 | 5.527448937 | 5.472573522 | 5.537832242 | 5.54343219  | 6.631858393 |
| USP13       | 5.055242914 | 5.666715708 | 5.181102362  | 4.937641876 | 5.627906955 | 4.973120544 | 4.973210544 | 5.867952442 | 6.696859421 | 5.648061898 | 5.877594978 | 5.504642821 | 4.985675589 | 5.396404718 | 5.550202565 | 5.878681563 | 5.306223257 | 5.44156317  |
| MARS2       | 5.811468297 | 5.429430598 | 5.182743209  | 5.182743209 | 5.629126281 | 4.952804384 | 5.253536408 | 5.309515294 | 5.823834747 | 5.295450427 | 5.856729399 | 5.520736281 | 5.47300921  | 4.960556428 | 5.813216826 | 5.461893203 | 5.320911977 | 5.472535169 |
| CHB12       | 5.670888038 | 5.090484515 | 5.012825501  | 5.811954987 | 5.507576912 | 5.756251845 | 5.798737343 | 5.501860153 | 5.442036953 | 5.379546884 | 5.370624161 | 5.736220776 | 5.820548917 | 5.044166961 | 5.554864894 | 5.233827874 | 5.06545789  | 5.301912616 |
| ZNF42       | 6.016642765 | 5.134154687 | 5.134154687  | 5.134154687 | 5.271490966 | 5.237765993 | 5.451765993 | 5.507166333 | 5.389929632 | 5.389929632 | 5.309101322 | 5.432476248 | 5.112347544 | 5.124905215 | 5.724961239 | 5.156816123 | 5.112347544 | 5.68406325  |
| HD118155    | 6.007329987 | 5.440192597 | 5.440192597  | 5.440192597 | 5.466002116 | 5.544548868 | 5.781730144 | 5.650754563 | 5.464403052 | 5.478548523 | 5.570651695 | 5.471453742 | 5.195721696 | 5.400727321 | 5.516460543 | 5.550995201 | 5.480772382 | 5.476478373 |
| SPIRE1      | 5.384814559 | 5.752858775 | 4.862539603  | 4.857095507 | 5.160240607 | 4.865578803 | 5.221079299 | 5.53120525  | 5.569596603 | 5.670293100 | 5.628464680 | 4.86364873  | 4.934217181 | 5.670593721 | 5.973982179 | 5.617993244 | 5.460512020 | 5.476273068 |
| FFGT        | 5.315580934 | 5.091709664 | 5.962552343  | 5.063286908 | 6.122313449 | 5.8800172   | 5.471805759 | 5.620216531 | 5.569241367 | 5.490348029 | 5.923820313 | 4.975188606 | 5.183482529 | 5.749805874 | 5.464547349 | 5.425578662 | 5.345751234 | 5.519616901 |
| RP11-529K1  | 5.46895314  | 5.744274001 | 5.669322732  | 5.534252391 | 5.501482166 | 5.825595946 | 5.165627698 | 5.419039049 | 5.552820682 | 5.186665233 | 5.46064911  | 5.809057474 | 5.827991468 | 5.150449771 | 5.512966708 | 5.419438278 | 5.139406076 | 5.184163238 |
| ZNF428      | 5.819252318 | 5.217238055 | 5.194585676  | 5.141073967 | 5.141073967 | 5.137862893 | 5.963944914 | 5.853891249 | 5.853891249 | 5.853891249 | 5.166857458 | 6.303516082 | 5.248710009 | 5.540805082 | 5.431802941 | 5.591912808 | 5.591912808 | 5.59248553  |
| WDR76       | 5.223092863 | 5.130919825 | 5.223092863  | 5.130919825 | 5.130919825 | 5.182979164 | 5.995107591 | 5.368884642 | 5.773204225 | 5.512614734 | 5.047732625 | 5.135150628 | 5.130839142 | 5.684482171 | 5.844336201 | 5.438282828 | 5.483789739 | 5.746932011 |
| MMX         | 5.965514678 | 5.760991178 | 6.482118648  | 6.482118648 | 6.482118648 | 6.678947259 | 5.20927406  | 5.103960969 | 5.404432613 | 5.52616202  | 5.625598598 | 4.881654399 | 4.881761977 | 4.872202523 | 5.187940446 | 5.203081928 | 5.144665885 | 5.521033537 |
| SPTA13      | 5.471589444 | 5.435092518 | 4.980748225  | 5.28585777  | 5.174813058 | 5.42834854  | 5.85304212  | 5.588451683 | 5.68990939  | 5.48030963  | 5.140333594 | 5.304529244 | 6.09144469  | 5.636141788 | 5.579163946 | 5.429174048 |             |             |
| AURKA       | 5.3939717   | 5.222351351 | 4.936626754  | 5.055306359 | 5.441330283 | 5.129700208 | 5.590936721 | 5.382955345 | 5.47964198  | 5.31040517  | 5.479388816 | 6.119410806 | 5.911097306 | 4.924042326 | 5.917806038 | 5.534426532 | 5.170700744 | 5.198363313 |
| UTY         | 5.9820147   | 5.566305709 | 5.688518515  | 5.456305709 | 4.637457095 | 4.695953403 | 5.778036467 | 5.533785487 | 5.440267422 | 5.461043881 | 5.569789785 | 4.696206388 | 4.690282024 | 4.782643401 | 5.537707702 | 5.520841581 | 4.788889566 | 5.47544436  |
| HACE1       | 5.346165043 | 5.096822523 | 4.928481011  | 5.003846947 | 5.483279654 | 5.101460309 | 5.496792655 | 5.653464485 | 5.619486008 | 5.479681347 | 5.435579476 | 5.01593925  | 5.00202125  | 5.051699212 | 5.860756169 | 5.576395062 | 5.786673546 | 5.904299462 |
| NHSL2       | 5.410703557 | 5.493813768 | 5.4370081861 | 5.312057942 | 5.441100787 | 5.618688822 | 5.571197725 | 5.454979625 | 5.571197725 | 5.396726267 | 5.519795414 | 5.374231745 | 5.506604533 | 5.45693508  | 5.481126767 | 5.52876451  | 5.591957296 | 5.383798743 |
| NOO1        | 5.437043905 | 5.373668023 | 5.488025378  | 5.419220481 | 5.419220481 | 5.375481347 | 5.466725779 | 5.617740055 | 5.294382196 | 5.568294038 | 5.423011106 | 5.423510216 | 5.519854083 | 5.46558812  | 5.600988215 | 5.503453009 | 5.563392966 | 5.545543132 |
| BLOC15-TK   | 5.694454377 | 5.387006963 | 5.544417107  | 5.425613635 | 5.491014441 | 6.015201961 | 5.49443566  | 5.351776475 | 5.441937236 | 5.581171602 | 5.542920008 | 5.371676682 | 5.887784985 | 5.597485522 | 5.334278827 | 5.348122229 | 5.533532345 | 5.298369567 |
| BBS         | 5.594029007 | 5.640353663 | 5.170940007  | 5.21852563  | 5.512865563 | 5.51202982  | 5.325748359 | 5.671152345 | 5.464298005 | 5.547447396 | 5.444252536 | 5.38505319  | 6.052625296 | 5.28347653  | 5.568182381 | 5.473696276 | 5.46967896  | 5.466727437 |
| BRD7        | 5.839640797 | 5.376170831 | 4.900162701  | 5.323420516 | 5.012951999 | 4.924571845 | 5.454892485 | 6.020255505 | 5.448272989 | 5.37574728  | 6.481565454 | 4.926153172 | 4.932500419 | 5.685105367 | 5.541879926 | 5.300573053 | 6.359212195 |             |
| FZD1        | 5.112951161 | 4.913456029 | 4.905052348  | 4.905052348 | 5.20864203  | 5.594451198 | 5.694855214 | 5.429934266 | 5.365457339 | 5.686878803 | 5.731440811 | 5.649114909 | 6.702971733 | 6.130822572 | 5.472436406 | 5.347940343 | 6.114073019 |             |
| RUNX1T1     | 5.638852715 | 5.533295111 | 5.552176303  | 5.419605603 | 5.49751984  | 4.907548523 | 5.624654649 | 5.371408099 | 5.394678024 | 5.403365698 | 5.511218952 | 4.905573554 | 4.905647018 | 5.683623485 | 4.466251973 | 5.204213106 | 5.462070398 | 5.438549959 |
| ITGA1       | 5.043894874 | 5.473023473 | 5.190012577  | 5.574853847 | 5.119965304 | 5.350020232 | 5.427466347 | 5.119965304 | 5.427466347 | 5.501223183 | 5.804645985 | 5.4824562   | 5.256771278 | 5.513364579 | 5.478675702 | 6.184486175 | 5.478675702 | 6.184486175 |
| SEMA7       | 5.545796291 | 5.245852968 | 5.495152497  | 5.245852968 | 4.865161659 | 4.865161659 | 4.873260629 | 6.167232548 | 5.29524738  | 5.409002503 | 6.147042132 | 5.239076117 | 5.49134059  | 4.875685233 | 7.020459498 | 4.196626734 | 5.92729118  | 5.608540593 |
| ARGAP11A    | 5.439421925 | 5.373087636 | 5.374506063  | 5.292490043 | 5.361954065 | 5.114374723 | 5.410588969 | 5.942548082 | 5.284431871 | 5.542364958 | 5.971296247 | 5.459862115 | 5.816053739 | 5.478222966 | 6.112028386 | 5.922706367 | 5.344290863 | 6.15959411  |
| PGAP1       | 5.413188641 | 5.378986487 | 5.436661154  | 5.28187915  | 5.154865525 | 5.394930469 | 5.402952562 | 6.902947971 | 5.532544929 | 5.894885729 | 5.62277847  | 5.434731054 | 5.41089476  | 5.6102788   | 6.459484422 | 6.64947711  | 6.023008063 | 7.08381348  |
| PHF2        | 5.615409956 | 5.480238636 | 5.480238636  | 5.480238636 | 5.480238636 | 5.480238636 | 5.480238636 | 5.480238636 | 5.480238636 | 5.480238636 | 5.480238636 | 5.480238636 | 5.480238636 | 5.480238636 | 5.480238636 | 5.480238636 | 5.480238636 | 5.480238636 |
| RPGRP1L     | 5.858838863 | 5.177659005 | 5.177659005  | 5.177659005 | 5.177659005 | 5.177659005 | 5.177659005 | 5.177659005 | 5.177659005 | 5.177659005 | 5.177659005 | 5.177659005 | 5.177659005 | 5.177659005 | 5.177659005 | 5.177659005 | 5.177659005 | 5.177659005 |
| RPL11-10801 | 5.364995108 | 5.386824721 | 5.95570546   | 5.24152146  | 5.186039343 | 5.372334943 | 6.07880474  | 5.642840356 | 5.520321372 | 5.39731434  | 5.420766128 | 5.713647938 | 5.479798701 | 5.165695621 | 5.451280351 | 5.445162385 | 5.507564322 | 5.285414305 |
| LIRA1       | 5.690563831 | 5.532309498 | 5.532309498  | 5.532309498 | 5.532309498 | 5.532309498 | 5.532309498 | 5.532309498 | 5.532309498 | 5.532309498 | 5.532309498 | 5.532309498 | 5.532309498 | 5.532309498 | 5.532309498 | 5.532309498 | 5.532309498 | 5.532309498 |
| DAPK2       | 5.64819611  | 5.283104832 | 5.239267233  | 5.287297968 | 5.515794594 | 5.139830702 | 5.396484048 | 5.756162199 | 5.495864802 | 5.620898065 | 5.248347998 | 5.284097328 | 5.232148603 | 5.329176996 | 6.448962817 | 5.78704749  | 6.237457268 | 7.111224699 |
| PAK9L       | 5.81558744  | 5.030108816 | 5.030108816  | 5.030108816 | 5.030108816 | 5.030108816 | 5.030108816 | 5.030108816 | 5.030108816 | 5.030108816 | 5.030108816 | 5.030108816 | 5.030108816 | 5.030108816 | 5.030108816 | 5.030108816 | 5.030108816 | 5.030108816 |
| AC00950.1   | 5.990366364 | 5.582155236 | 5.264292871  | 5.586888241 | 5.369826251 | 5.568814455 | 5.525894227 | 5.140285971 | 5.368866456 | 5.686616028 | 5.801189561 | 6.3702033   | 5.305432199 | 5.249847605 | 5.520827371 | 5.276410359 | 5.300342577 |             |
| PHF202      | 5.615409956 | 5.480238636 | 5.480238636  | 5.480238636 | 5.480238636 | 5.480238636 | 5.480238636 | 5.480238636 | 5.480238636 | 5.480238636 | 5.480238636 | 5.480238636 | 5.480238636 | 5.480238636 | 5.480238636 | 5.480238636 | 5.480238636 | 5.480238636 |
| SHIM1       | 5.610236369 | 5.414517085 | 5.414517085  | 5.414517085 | 5.414517085 | 5.414517085 | 5.414517085 | 5.414517085 | 5.414517085 | 5.414517085 | 5.414517085 | 5.414517085 | 5.414517085 | 5.414517085 | 5.414517085 | 5.414517085 | 5.414517085 | 5.414517085 |
| ZNF441      | 5.056193641 | 4.905919739 | 5.556320791  | 4.988812593 | 5.331864569 | 5.024938812 | 5.915099561 | 5.689448383 | 5.878607059 | 5.698811967 | 6.177356002 | 4.849645684 | 5.05694958  | 5.095096864 | 5.932027102 | 6.789515326 | 6.572507117 | 5.793471317 |
| CA13        | 5.205814315 | 5.118914515 | 5.118914515  | 5.118914515 | 5.118914515 | 5.118914515 | 5.118914515 | 5.118914515 | 5.118914515 | 5.118914515 | 5.118914515 | 5.118914515 | 5.118914515 | 5.118914515 | 5.118914515 | 5.118914515 | 5.118914515 | 5.118914515 |
| PPP1R3F     | 5.31266337  | 5.469772172 | 4.911794122  | 6.441528589 | 5.444717784 | 6.107963049 | 4.918705933 | 5.527176522 | 5.440622834 | 5.615613018 | 5.49277272  | 5.243302714 | 4.94859817  | 5.60553621  | 5.173037794 | 5.62768824  | 5.25237114  | 5.302221693 |
| KLF5        | 4.983665785 | 6.373330466 | 5.287330466  | 5.582593151 | 5.005584384 | 5.926393269 | 5.061473059 | 5.325465391 | 5.673379323 | 5.620027202 | 5.52114334  | 5.678134469 | 5.476273133 | 5.063955361 | 5.047588086 | 5.195123748 | 5.6974627   | 5.041379458 |
| ER12        | 5.24344126  | 5.322451696 | 5.322451696  | 5.183986621 | 5.4034888   | 5.788622227 | 3.565240943 | 5.761864415 | 5.614602106 | 5.57015242  | 5.676119965 | 5.225782655 | 5.105783222 | 5.36565302  | 5.464319343 | 5.593696302 | 5.676883642 | 5.940933115 |
| CPY2E1      | 5.464647419 | 5.48937609  | 4.776651542  | 5.48937609  | 4.776651542 | 4.802736645 | 4.7         |             |             |             |             |             |             |             |             |             |             |             |

|           |              |             |             |             |             |             |             |             |             |             |             |             |             |             |             |             |             |             |
|-----------|--------------|-------------|-------------|-------------|-------------|-------------|-------------|-------------|-------------|-------------|-------------|-------------|-------------|-------------|-------------|-------------|-------------|-------------|
| MGSTZ     | 5.721228848  | 6.895667201 | 4.663282511 | 4.652212903 | 5.474691791 | 5.360960383 | 4.668317346 | 5.601303958 | 5.799864315 | 5.577598905 | 5.776285881 | 4.716784705 | 4.665656481 | 4.672954163 | 5.447766649 | 4.747734295 | 5.186006575 | 6.815825628 |
| ADPRLH    | 5.480033233  | 5.989448011 | 7.511846839 | 5.00538055  | 6.406767407 | 5.012679778 | 4.847165891 | 5.254360348 | 5.894461218 | 5.171333476 | 5.484432568 | 5.39028223  | 4.839242333 | 4.896733554 | 5.455488053 | 6.139247712 | 5.543625212 | 5.296488356 |
| HUA-DOA   | 5.334656435  | 5.30059094  | 5.426836158 | 5.28592985  | 5.3443301   | 5.073987917 | 5.440359696 | 6.047296375 | 5.21444417  | 5.53897242  | 5.284687876 | 5.349877624 | 5.451491245 | 5.439326937 | 5.985558384 | 5.363393568 | 5.456836295 | 5.585979769 |
| DHRH      | 5.086403966  | 5.213667416 | 5.20378507  | 5.491142898 | 5.13467579  | 5.400411273 | 5.203242587 | 5.371721421 | 5.482327147 | 5.46719559  | 5.241360763 | 5.378142373 | 5.262792905 | 5.279174858 | 4.99332792  | 5.184720727 | 5.775449379 | 5.001019361 |
| ENB3      | 5.493530433  | 5.395301433 | 5.405197434 | 5.491380661 | 5.24737745  | 5.37321388  | 5.281981527 | 5.648951915 | 5.512516564 | 5.967412373 | 5.241360763 | 5.733810081 | 5.261295788 | 5.476129578 | 5.476129578 | 5.476129578 | 5.476129578 | 5.476129578 |
| ACD1346L1 | 5.2169917483 | 5.199910396 | 5.236884815 | 5.23085527  | 5.2114637   | 5.203582579 | 5.2114637   | 5.203582579 | 5.2114637   | 5.203582579 | 5.2114637   | 5.203582579 | 5.2114637   | 5.203582579 | 5.2114637   | 5.203582579 | 5.2114637   | 5.203582579 |
| NIJDT1    | 5.049723236  | 5.562456106 | 5.340029978 | 5.517588704 | 5.174869114 | 5.006862503 | 5.371131767 | 5.417892645 | 5.315645612 | 5.546617122 | 5.383277151 | 5.210466113 | 5.686356323 | 5.499871879 | 5.43047762  | 5.204486628 | 5.43841067  | 5.526497240 |
| FASN      | 5.609508888  | 5.523763549 | 5.406240878 | 5.237623165 | 5.392976227 | 5.40614088  | 5.324094616 | 5.40614088  | 5.324094616 | 5.40614088  | 5.324094616 | 5.40614088  | 5.324094616 | 5.40614088  | 5.324094616 | 5.40614088  | 5.324094616 | 5.40614088  |
| SMCR8     | 5.062465632  | 5.32766589  | 5.18021967  | 5.438187994 | 5.07907669  | 5.083598391 | 5.07794431  | 5.81969089  | 5.544248391 | 5.680004232 | 5.821514446 | 5.575777335 | 5.06878731  | 5.116614356 | 5.470629396 | 5.358878368 | 5.81217672  | 5.531861673 |
| PCDD11G2  | 5.737280897  | 4.796340639 | 5.282108977 | 4.796340639 | 5.282108977 | 4.796340639 | 5.282108977 | 4.796340639 | 5.282108977 | 4.796340639 | 5.282108977 | 4.796340639 | 5.282108977 | 4.796340639 | 5.282108977 | 4.796340639 | 5.282108977 | 4.796340639 |
| WRD4      | 4.91037361   | 5.402335607 | 6.059096994 | 4.91037361  | 5.402335607 | 6.059096994 | 4.91037361  | 5.402335607 | 6.059096994 | 4.91037361  | 5.402335607 | 6.059096994 | 4.91037361  | 5.402335607 | 6.059096994 | 4.91037361  | 5.402335607 | 6.059096994 |
| TCFS      | 5.676385784  | 5.138437953 | 5.27286203  | 6.093192553 | 5.179397992 | 4.964916987 | 5.666077264 | 5.265887171 | 5.193291783 | 5.653725089 | 5.67851118  | 5.518496073 | 5.811015922 | 5.400824699 | 5.071693266 | 5.283827588 | 5.451428505 | 5.451428505 |
| KT012     | 5.04954619   | 5.071186971 | 5.47065761  | 5.45150525  | 5.016497473 | 5.03163577  | 5.660333    | 5.309597037 | 5.309597037 | 5.309597037 | 5.309597037 | 5.309597037 | 5.309597037 | 5.309597037 | 5.309597037 | 5.309597037 | 5.309597037 | 5.309597037 |
| RCOR1     | 5.352680399  | 4.933301747 | 5.011947309 | 5.189148078 | 5.577948076 | 5.696916478 | 5.325103683 | 5.733120007 | 5.601096784 | 5.26586342  | 5.547518164 | 5.718883448 | 4.934287341 | 5.438540288 | 5.62788075  | 5.22263180  | 5.344393066 | 5.603485336 |
| IL17R8    | 5.682662724  | 4.8287479   | 5.826540025 | 5.438274678 | 4.91075016  | 4.813485413 | 5.17397677  | 5.923870936 | 5.418678759 | 5.429240048 | 5.451928947 | 5.580292037 | 4.829785275 | 4.83134005  | 5.668752166 | 5.376028383 | 5.088740670 | 6.090520182 |
| CRV81     | 5.737125958  | 5.802018041 | 5.253471793 | 6.090392406 | 5.696996911 | 6.127276294 | 5.887234073 | 5.428945936 | 5.226660404 | 5.324621137 | 5.647420871 | 5.634174896 | 5.033847174 | 5.09175173  | 5.306653194 | 5.282756617 | 5.361740831 | 5.29001487  |
| FAM3A4    | 5.454425793  | 5.544275208 | 5.608306692 | 5.008184669 | 5.488113996 | 5.503232069 | 5.642163531 | 5.544273988 | 5.350297656 | 5.436754628 | 5.218360797 | 5.944898435 | 5.038188946 | 4.87052778  | 5.723083788 | 5.445141102 | 5.285180957 | 5.273188528 |
| ZSWIM6    | 5.159947445  | 4.925396119 | 5.59651022  | 5.357085796 | 5.174254786 | 4.926989779 | 5.090347713 | 5.824827974 | 5.510214949 | 5.866662396 | 5.272213949 | 5.694347896 | 5.268909656 | 5.722213949 | 5.845568386 | 5.336303031 | 5.648414191 | 5.549115197 |
| HCT20     | 4.872456515  | 4.837211746 | 6.472891038 | 6.077405343 | 4.834737518 | 4.841047817 | 5.363550894 | 5.969833795 | 5.655404084 | 5.655037186 | 5.655037186 | 5.655037186 | 5.655037186 | 5.655037186 | 5.655037186 | 5.655037186 | 5.655037186 | 5.655037186 |
| CPB1      | 6.03281292   | 5.315416678 | 5.305928955 | 5.387968691 | 5.387968691 | 5.387968691 | 5.387968691 | 5.387968691 | 5.387968691 | 5.387968691 | 5.387968691 | 5.387968691 | 5.387968691 | 5.387968691 | 5.387968691 | 5.387968691 | 5.387968691 | 5.387968691 |
| IRP18P1   | 5.239924984  | 5.574071369 | 5.451058003 | 5.355155053 | 5.124410746 | 5.265254084 | 5.435264084 | 5.487244416 | 5.487244416 | 5.487244416 | 5.487244416 | 5.487244416 | 5.487244416 | 5.487244416 | 5.487244416 | 5.487244416 | 5.487244416 | 5.487244416 |
| PP1R31    | 5.761716043  | 5.093548839 | 5.408995407 | 5.093548839 | 5.408995407 | 5.093548839 | 5.408995407 | 5.093548839 | 5.408995407 | 5.093548839 | 5.408995407 | 5.093548839 | 5.408995407 | 5.093548839 | 5.408995407 | 5.093548839 | 5.408995407 | 5.093548839 |
| FM04      | 5.445085174  | 6.052959713 | 5.953039945 | 4.975448376 | 5.808292767 | 4.82426767  | 4.82412434  | 5.429880409 | 5.387062798 | 5.344106823 | 5.033149152 | 6.313879568 | 5.06152385  | 4.827213294 | 5.297428121 | 5.680997701 | 5.429091598 | 4.876164315 |
| ANGP16    | 5.722717957  | 5.011034727 | 5.527308778 | 5.719210147 | 5.05784585  | 5.886572416 | 5.34981897  | 5.544395761 | 5.42891875  | 5.65855334  | 5.01766877  | 6.00018706  | 5.072971538 | 5.399625113 | 5.574474079 | 5.380528248 | 5.564173404 | 5.564173404 |
| TRIM59    | 5.347898045  | 5.270883948 | 5.74261901  | 5.034805447 | 5.53780286  | 6.06013042  | 5.02565647  | 5.693856246 | 5.68804513  | 5.774718147 | 5.134357976 | 5.13996072  | 5.235736671 | 5.325898341 | 5.286671114 | 5.66831842  | 5.480387569 | 5.480387569 |
| EH03      | 5.492495487  | 6.534544127 | 4.825449487 | 6.610244843 | 5.348565525 | 4.829254973 | 5.872174028 | 5.86125773  | 5.872907711 | 5.872907711 | 5.872907711 | 5.872907711 | 5.872907711 | 5.872907711 | 5.872907711 | 5.872907711 | 5.872907711 | 5.872907711 |
| TRMT104   | 5.01744968   | 4.901042174 | 5.29737906  | 5.98912867  | 6.136791502 | 5.024017343 | 5.158304399 | 5.306825617 | 5.469354022 | 5.558717357 | 5.718647202 | 4.965279614 | 5.464103875 | 5.234238859 | 5.617067579 | 5.346886644 | 5.83126017  | 5.83126017  |
| CPB2      | 6.247638296  | 5.410021124 | 5.325496626 | 5.410021124 | 5.325496626 | 5.410021124 | 5.325496626 | 5.410021124 | 5.325496626 | 5.410021124 | 5.325496626 | 5.410021124 | 5.325496626 | 5.410021124 | 5.325496626 | 5.410021124 | 5.325496626 | 5.410021124 |
| SCN01D    | 8.386577625  | 5.851345169 | 5.224500406 | 5.851345169 | 5.224500406 | 5.851345169 | 5.224500406 | 5.851345169 | 5.224500406 | 5.851345169 | 5.224500406 | 5.851345169 | 5.224500406 | 5.851345169 | 5.224500406 | 5.851345169 | 5.224500406 | 5.851345169 |
| TAGLN     | 5.823475587  | 5.083435052 | 5.021534054 | 6.333619851 | 5.768629224 | 4.935850409 | 5.050646019 | 5.713327742 | 5.180349769 | 5.20757907  | 5.341839305 | 5.352681672 | 5.803571387 | 5.451719479 | 5.88169194  | 5.313368005 | 5.742421675 | 5.926476781 |
| ZNF784    | 5.697973576  | 5.066704222 | 5.066704222 | 5.472084196 | 5.454280474 | 5.7768635   | 4.979036824 | 5.461460786 | 5.461460786 | 5.461460786 | 5.461460786 | 5.461460786 | 5.461460786 | 5.461460786 | 5.461460786 | 5.461460786 | 5.461460786 | 5.461460786 |
| ZCZC1C    | 5.986230307  | 4.914519075 | 4.750308635 | 4.743630643 | 4.768727337 | 5.534197721 | 4.786661921 | 3.564876214 | 5.682104687 | 5.453849007 | 5.305959972 | 4.771789057 | 6.425256198 | 4.762166117 | 5.492911942 | 5.786718268 | 5.40222222  | 5.353940012 |
| ABC6A     | 5.112923861  | 5.637688854 | 5.637688854 | 5.112923861 | 5.637688854 | 5.112923861 | 5.637688854 | 5.112923861 | 5.637688854 | 5.112923861 | 5.637688854 | 5.112923861 | 5.637688854 | 5.112923861 | 5.637688854 | 5.112923861 | 5.637688854 | 5.112923861 |
| LSAMP     | 4.834201157  | 4.890147655 | 4.930951008 | 4.928294741 | 5.076109652 | 6.051802771 | 6.058332473 | 5.181843748 | 6.382146841 | 5.518101908 | 5.88785346  | 4.89898468  | 4.89590181  | 4.953764979 | 3.89442927  | 5.999362418 | 5.90419517  | 5.245386033 |
| WRK11     | 5.26242971   | 5.270671186 | 5.357263387 | 6.425949662 | 6.077017784 | 6.153547182 | 5.551762103 | 5.590740646 | 5.497815554 | 5.216400212 | 5.497815554 | 5.216400212 | 5.497815554 | 5.216400212 | 5.497815554 | 5.216400212 | 5.497815554 | 5.216400212 |
| CP170B    | 5.491580465  | 4.91580465  | 4.91580465  | 4.91580465  | 4.91580465  | 4.91580465  | 4.91580465  | 4.91580465  | 4.91580465  | 4.91580465  | 4.91580465  | 4.91580465  | 4.91580465  | 4.91580465  | 4.91580465  | 4.91580465  | 4.91580465  | 4.91580465  |
| ACD7      | 4.79058403   | 4.785929853 | 5.924214243 | 5.910213419 | 5.713732903 | 4.971778695 | 6.239487724 | 5.538948373 | 5.135503310 | 5.245924349 | 5.464386235 | 6.07686007  | 4.788152857 | 4.795274398 | 6.151338986 | 5.211176384 | 5.291967452 | 5.716988647 |
| CRB5      | 4.713234249  | 4.67681703  | 4.720299393 | 4.768185713 | 4.720299393 | 4.757237927 | 4.734918721 | 5.786680315 | 5.752237361 | 6.298783874 | 6.396486699 | 4.721030252 | 6.433735545 | 4.729027844 | 5.931338503 | 6.024699705 | 4.673424707 | 6.089405347 |
| NCKA1P    | 5.017211606  | 4.95180357  | 4.96984935  | 4.905139223 | 4.901123589 | 5.03386173  | 5.466045387 | 6.625761912 | 6.228315413 | 6.347967328 | 5.339729546 | 5.000947877 | 5.197482145 | 5.150246427 | 5.737359693 | 5.408231569 | 5.784199396 | 7.92322044  |
| FUT6      | 5.229741269  | 5.182862895 | 5.223643339 | 5.40002485  | 5.096400785 | 5.964610664 | 5.973756311 | 5.620982865 | 5.202411521 | 5.265626849 | 5.811682458 | 5.433493037 | 5.617263268 | 5.347433503 | 5.167238616 | 5.37433503  | 5.578917266 | 5.578917266 |
| CENP      | 5.196859321  | 6.846984005 | 5.156388019 | 5.418289877 | 5.12070367  | 5.189392585 | 5.32803536  | 5.753064546 | 6.073187873 | 5.229824452 | 5.617946001 | 5.18226895  | 4.965346445 | 4.897142876 | 6.025939669 | 6.326103139 | 5.932739845 | 5.932739845 |
| TPD5L1    | 6.247638296  | 4.964977251 | 4.97775762  | 6.093192553 | 5.161407367 | 5.012878563 | 5.89        |             |             |             |             |             |             |             |             |             |             |             |

|            |             |             |             |             |             |             |             |             |             |             |             |             |             |             |             |             |             |             |
|------------|-------------|-------------|-------------|-------------|-------------|-------------|-------------|-------------|-------------|-------------|-------------|-------------|-------------|-------------|-------------|-------------|-------------|-------------|
| FAM175A    | 5.287427155 | 5.182382838 | 5.674732684 | 5.283152147 | 5.307387267 | 5.292215164 | 5.32961111  | 5.651574613 | 5.240776789 | 5.658894631 | 5.719910527 | 5.267575231 | 5.328870464 | 5.223904231 | 5.726052175 | 5.847924029 | 5.866576415 | 5.5363278   |
| BC11A      | 5.647856108 | 4.831339449 | 4.980411264 | 5.420866233 | 5.678862013 | 4.858429661 | 5.184593722 | 5.291751824 | 5.412394942 | 5.753431541 | 4.950466873 | 4.959948671 | 5.373598425 | 5.56659262  | 5.635945512 | 4.842670657 | 4.954798004 | 6.345862229 |
| POLR2J     | 5.06608217  | 5.370584671 | 5.113725054 | 5.103134311 | 5.084909355 | 5.068620655 | 5.29095639  | 5.734012675 | 5.051989625 | 5.154818394 | 5.390776283 | 5.158214675 | 5.23039017  | 5.333131694 | 5.754176497 | 5.320945672 | 6.119519177 | 5.80112465  |
| Clor17H    | 5.28221929  | 5.220460125 | 5.22746725  | 5.149995877 | 5.559775026 | 5.248400306 | 5.35308446  | 6.260525831 | 5.5442016   | 5.739490904 | 5.596716079 | 5.219900005 | 5.19357419  | 5.300103065 | 6.116287268 | 5.516328132 | 6.066828433 | 5.207824843 |
| CH1FA      | 4.745324081 | 4.720324083 | 4.745324083 | 4.745324083 | 4.745324083 | 4.745324083 | 4.745324083 | 4.745324083 | 4.745324083 | 4.745324083 | 4.745324083 | 4.745324083 | 4.745324083 | 4.745324083 | 4.745324083 | 4.745324083 | 4.745324083 | 4.745324083 |
| ZHXH       | 5.321391925 | 5.321391925 | 5.321391925 | 5.321391925 | 5.321391925 | 5.321391925 | 5.321391925 | 5.321391925 | 5.321391925 | 5.321391925 | 5.321391925 | 5.321391925 | 5.321391925 | 5.321391925 | 5.321391925 | 5.321391925 | 5.321391925 | 5.321391925 |
| TNS2       | 4.987470978 | 4.920379328 | 5.200707711 | 5.804061833 | 4.911791799 | 5.493028511 | 5.414133335 | 5.580547441 | 5.365952801 | 5.140695700 | 5.533306113 | 5.841183618 | 5.221747253 | 4.98016477  | 5.618216163 | 5.419970136 | 5.470256164 | 5.557807352 |
| ATP7B      | 5.082975749 | 5.607618823 | 5.507618823 | 5.894545363 | 5.301336767 | 4.983092029 | 6.415491472 | 5.893541046 | 5.408777317 | 5.50885531  | 5.722238043 | 4.851829229 | 5.069504662 | 5.780222182 | 5.237606683 | 5.007776257 | 5.780840061 | 6.374492874 |
| PLEKHG4B   | 6.121235368 | 5.169544959 | 5.317176787 | 5.207878756 | 5.146939144 | 5.225852141 | 5.368217593 | 5.310795424 | 5.106361045 | 5.46544472  | 5.325040183 | 6.360366455 | 6.410584335 | 5.797474952 | 5.51037571  | 5.47692917  | 5.89984029  | 5.16410665  |
| BB57       | 5.533070953 | 5.794354156 | 4.799380928 | 5.493011437 | 5.201514905 | 5.442505939 | 5.341233932 | 5.108858977 | 5.683415908 | 5.109668977 | 5.494261795 | 5.146133983 | 5.114137361 | 5.553319796 | 5.688906074 | 5.237337871 | 5.614810952 | 5.410197577 |
| ADAMT54    | 5.139992385 | 5.251978399 | 5.175928399 | 5.139940029 | 6.094778316 | 5.286109296 | 5.175631661 | 5.576061807 | 5.318471126 | 4.88086285  | 5.53203193  | 5.27794906  | 5.353069786 | 5.311945582 | 5.280978092 | 5.508264595 | 5.348521149 | 5.222610742 |
| PT11-651A1 | 5.719298489 | 5.027313017 | 5.00585138  | 5.28542183  | 5.123503329 | 5.02149698  | 5.436609439 | 5.357033864 | 5.357033864 | 5.366438814 | 5.64005102  | 5.04898639  | 5.184988044 | 5.240092024 | 5.196547945 | 5.343532927 | 5.34110151  |             |
| SLC37A2    | 6.190065    | 5.026515903 | 5.070343781 | 5.502573185 | 5.095627627 | 5.511575404 | 6.292270777 | 6.665374148 | 5.146839937 | 5.15451502  | 5.519891236 | 4.921762202 | 5.084839579 | 5.17575614  | 5.776737724 | 5.113616316 | 5.458928179 | 5.688848775 |
| MYL9       | 5.373313483 | 5.834011552 | 4.834011552 | 5.308911746 | 5.576494135 | 4.7401355   | 5.40106255  | 5.318634239 | 5.11754966  | 5.556481646 | 5.027574356 | 5.589376372 | 5.368673488 | 5.20867111  | 5.182524576 | 5.301706653 |             |             |
| PAK6       | 5.776173884 | 5.039288632 | 5.196047416 | 4.90066371  | 5.628868676 | 5.548772586 | 5.404151317 | 5.351602838 | 5.328368949 | 5.431267427 | 5.374160446 | 5.298445609 | 4.841735558 | 4.9460309   | 5.181863316 | 5.098606012 | 5.492184252 | 5.390042447 |
| B3GN1TL    | 5.133063105 | 5.133063105 | 4.942557704 | 5.34071927  | 5.011382251 | 5.011382251 | 5.011382251 | 5.011382251 | 5.011382251 | 5.011382251 | 5.338991538 | 5.948385208 | 5.021651059 | 5.826544693 | 5.320460307 | 5.539923928 | 5.304845331 | 5.577155982 |
| PAK6       | 4.885837447 | 5.261531969 | 4.884630986 | 4.881947467 | 5.368199479 | 5.637465794 | 5.439389956 | 5.399118715 | 5.165327909 | 5.641904174 | 5.512522445 | 4.885181757 | 4.885217452 | 4.887044819 | 5.178659394 | 5.617426561 | 5.979806505 | 5.306317301 |
| LRCR29     | 5.276776275 | 5.797458353 | 4.930133705 | 4.484360391 | 5.05897259  | 4.994880808 | 5.753560693 | 5.319791006 | 5.377088481 | 5.347619215 | 5.28811094  | 5.793988088 | 4.854872304 | 5.990209099 | 5.52989795  | 5.219449178 | 5.302450007 | 5.634925994 |
| BCAR1      | 4.607462181 | 5.252293064 | 4.602267833 | 4.602267833 | 4.602267833 | 4.602267833 | 4.602267833 | 4.602267833 | 4.602267833 | 4.602267833 | 4.602267833 | 4.602267833 | 4.602267833 | 4.602267833 | 4.602267833 | 4.602267833 | 4.602267833 | 4.602267833 |
| Clor7A     | 5.505853458 | 4.903863567 | 5.95125236  | 5.615292596 | 5.615292596 | 5.615292596 | 5.615292596 | 5.615292596 | 5.615292596 | 5.615292596 | 5.615292596 | 5.615292596 | 5.615292596 | 5.615292596 | 5.615292596 | 5.615292596 | 5.615292596 | 5.615292596 |
| COLQ       | 5.344946442 | 6.895936421 | 4.885746122 | 5.652994005 | 4.843164238 | 5.014073461 | 4.94003189  | 5.635904829 | 5.41688093  | 5.226145531 | 5.226145531 | 5.226145531 | 5.226145531 | 5.226145531 | 5.226145531 | 5.226145531 | 5.226145531 | 5.226145531 |
| C3D3EAP    | 4.990022854 | 4.987472269 | 5.962054144 | 6.094392725 | 5.684516655 | 5.198165186 | 5.88855916  | 5.269860022 | 5.502738745 | 5.512727018 | 5.236258117 | 5.342805268 | 5.07808963  | 5.124012509 | 5.521537557 | 5.268210826 | 5.345935427 | 5.227771746 |
| LTPB1      | 5.311298584 | 5.158047048 | 4.846399976 | 5.204785499 | 5.677014663 | 4.848670916 | 5.10390966  | 5.555005247 | 5.781143924 | 5.961572804 | 5.555005247 | 5.847593652 | 4.8476709   | 4.851607337 | 5.256578431 | 5.681917228 | 5.75137495  | 5.301197171 |
| LUR83      | 5.135324513 | 5.135324513 | 5.305044723 | 5.186034211 | 5.07386889  | 5.542532521 | 5.553856566 | 5.4522696   | 5.690227371 | 5.446448784 | 4.918822849 | 5.092669189 | 5.6219861   | 5.30239203  | 5.310887683 | 5.517046439 | 5.636657386 |             |
| DKGH       | 5.973792548 | 5.319500527 | 6.26443051  | 5.121260268 | 5.249688291 | 5.024765634 | 5.063390703 | 5.239406174 | 5.349630704 | 5.861245191 | 5.28806311  | 5.284802478 | 5.278696262 | 5.208360618 | 6.109793602 | 5.383499526 | 5.368696154 | 5.50758693  |
| ZBT84A     | 6.22528412  | 4.842029409 | 6.159676831 | 5.617169465 | 5.133654604 | 4.847260299 | 6.111607939 | 5.776573675 | 5.332065246 | 5.64502555  | 5.166244448 | 4.844635106 | 4.849079852 | 5.752382113 | 5.361751775 | 5.217156273 | 5.244799569 |             |
| CH1FA      | 4.745324081 | 4.745324081 | 4.745324081 | 4.745324081 | 4.745324081 | 4.745324081 | 4.745324081 | 4.745324081 | 4.745324081 | 4.745324081 | 4.745324081 | 4.745324081 | 4.745324081 | 4.745324081 | 4.745324081 | 4.745324081 | 4.745324081 | 4.745324081 |
| ENAH       | 5.659631212 | 5.07166421  | 6.057619681 | 5.053170529 | 5.053170529 | 5.053170529 | 5.053170529 | 5.053170529 | 5.053170529 | 5.053170529 | 5.053170529 | 5.053170529 | 5.053170529 | 5.053170529 | 5.053170529 | 5.053170529 | 5.053170529 | 5.053170529 |
| ANKS1B     | 5.107892516 | 5.536807858 | 5.22627123  | 5.244640569 | 5.433207108 | 5.365179851 | 5.33228765  | 5.387261689 | 5.26984311  | 5.318905293 | 5.234829835 | 5.311152544 | 5.291478621 | 5.292874965 | 5.376190142 | 5.337154697 | 5.286712313 | 5.23483116  |
| TT30A      | 5.889811727 | 5.06804502  | 5.684754539 | 5.868714273 | 5.567576187 | 5.26077518  | 5.808868465 | 5.455891874 | 5.808868465 | 5.455891874 | 5.68834165  | 4.755144237 | 4.755227544 | 6.10566758  | 5.91096045  | 5.433640047 | 5.34320117  | 5.408225707 |
| TMEM177    | 5.278140725 | 6.292743482 | 4.823427842 | 5.818978555 | 5.407004361 | 5.559569923 | 4.899572597 | 5.180515407 | 5.521713193 | 5.32475794  | 5.046174616 | 5.152227745 | 5.541993039 | 4.828253342 | 5.608369964 | 5.025705982 | 5.151893622 | 5.337325164 |
| SOX6       | 4.793518801 | 4.846125734 | 6.17941512  | 4.846125734 | 5.02877082  | 4.834713513 | 6.20426549  | 6.226024184 | 5.2607642   | 5.04175467  | 4.842557884 | 4.838925219 | 4.8429174   | 6.800862117 | 6.06643007  | 6.00766417  | 6.382590649 |             |
| ASAP3      | 4.801851308 | 5.288247911 | 5.607313718 | 5.12929333  | 5.84531622  | 4.820304147 | 4.862393079 | 5.399105304 | 5.240043035 | 5.359774998 | 5.61756531  | 5.066088482 | 5.370299567 | 4.958848868 | 5.366579232 | 5.587327841 | 5.311758351 | 4.900438935 |
| LTPB1      | 5.36180131  | 5.174921714 | 5.243112101 | 5.243112101 | 5.243112101 | 5.243112101 | 5.243112101 | 5.243112101 | 5.243112101 | 5.243112101 | 5.243112101 | 5.243112101 | 5.243112101 | 5.243112101 | 5.243112101 | 5.243112101 | 5.243112101 | 5.243112101 |
| ARL10      | 5.205357742 | 5.181312097 | 7.206539879 | 5.108177549 | 5.108177549 | 5.108177549 | 5.108177549 | 5.108177549 | 5.108177549 | 5.108177549 | 5.108177549 | 5.108177549 | 5.108177549 | 5.108177549 | 5.108177549 | 5.108177549 | 5.108177549 | 5.108177549 |
| TMPS5A     | 4.832813162 | 4.72263914  | 4.858855753 | 4.745365163 | 4.952966303 | 4.850734033 | 5.027819327 | 6.711240269 | 4.63151161  | 4.29607538  | 5.63683678  | 7.442141835 | 5.701200919 | 4.952932939 | 7.776472764 | 4.710504818 | 5.566012287 | 4.907142151 |
| LACC1      | 5.940795156 | 5.003976184 | 5.627142713 | 5.09938188  | 5.0358344   | 5.081866202 | 5.329830989 | 5.291688398 | 5.329830989 | 5.291688398 | 5.9283504   | 4.812191738 | 6.290266801 | 4.964752677 | 5.862703507 | 5.008968718 | 5.121501335 | 5.051524645 |
| CS5        | 5.93247938  | 6.258785454 | 5.004492944 | 4.991462739 | 5.031887464 | 5.108824473 | 6.505495999 | 5.549582807 | 5.016572726 | 5.428422129 | 5.454615643 | 5.15384325  | 5.046044309 | 5.111953047 | 5.873821156 | 5.046931246 | 4.74298188  | 6.752608913 |
| RHCE       | 5.28413335  | 5.296435579 | 5.441527551 | 5.296435579 | 5.441527551 | 5.441527551 | 5.441527551 | 5.441527551 | 5.441527551 | 5.441527551 | 5.441527551 | 5.441527551 | 5.441527551 | 5.441527551 | 5.441527551 | 5.441527551 | 5.441527551 | 5.441527551 |
| TBC1D2     | 4.73956374  | 4.736471982 | 4.736471982 | 4.736471982 | 4.736471982 | 4.736471982 | 4.736471982 | 4.736471982 | 4.736471982 | 4.736471982 | 4.736471982 | 4.736471982 | 4.736471982 | 4.736471982 | 4.736471982 | 4.736471982 | 4.736471982 | 4.736471982 |
| KNA1B83    | 5.010957992 | 5.634190357 | 5.269518566 | 4.729301828 | 5.537002426 | 5.842056487 | 5.493760647 | 5.438651414 | 5.511883295 | 5.240284286 | 5.60651723  | 4.738757235 | 4.737947108 | 5.348280029 | 5.338822035 | 5.199747465 | 5.069271002 | 5.819499491 |
| ZBT84A     | 6.22528412  | 4.842029409 | 6.159676831 | 5.617169465 | 5.133654604 | 4.847260299 | 6.111607939 | 5.776573675 | 5.332065246 | 5           |             |             |             |             |             |             |             |             |

|           |             |             |             |             |             |             |             |             |             |              |             |             |             |             |              |             |             |             |
|-----------|-------------|-------------|-------------|-------------|-------------|-------------|-------------|-------------|-------------|--------------|-------------|-------------|-------------|-------------|--------------|-------------|-------------|-------------|
| CSDC2     | 5.480667054 | 4.863140609 | 5.167941653 | 4.844508797 | 5.539073027 | 5.596258083 | 4.863096383 | 4.933951708 | 4.955044763 | 4.98266197   | 5.231899857 | 6.154437044 | 5.214200291 | 4.928304139 | 5.254206401  | 5.287221727 | 5.534165378 | 5.428170566 |
| NOCT      | 5.086683352 | 5.065863449 | 4.90661404  | 4.96389531  | 5.226368397 | 4.820517917 | 4.888437256 | 5.636366798 | 5.598348432 | 5.376897996  | 5.648735827 | 5.025743354 | 5.05774812  | 5.218187497 | 5.76577154   | 5.621845981 | 5.415008395 | 5.438890359 |
| ARHGF10L  | 4.660021823 | 4.752372845 | 4.66500968  | 4.986499446 | 4.71772007  | 4.66500968  | 4.673014739 | 5.12805011  | 5.261982912 | 5.218317026  | 5.633785064 | 4.673028585 | 4.673106968 | 4.672359977 | 5.113142499  | 5.307541387 | 5.469136309 | 5.886087919 |
| ACTN3B    | 5.596901108 | 5.549235201 | 4.958678651 | 4.986499446 | 5.07145414  | 5.07145414  | 5.102616214 | 5.246393151 | 5.176384534 | 5.306544584  | 5.01411987  | 5.918120764 | 5.187058825 | 5.089894244 | 5.400012076  | 5.384969129 | 5.279591149 | 5.389656902 |
| ZNF577    | 5.139755739 | 5.169593022 | 4.804287722 | 4.804287722 | 5.091477123 | 5.091477123 | 5.297314534 | 5.297314534 | 5.051914667 | 5.427914667  | 5.427914667 | 4.868109274 | 5.050999759 | 5.150455125 | 5.670931027  | 5.680073071 | 5.274244008 | 5.572744008 |
| PHLD3A    | 5.78478073  | 4.62214185  | 4.654406655 | 4.626551127 | 4.678218915 | 4.669971251 | 4.840778766 | 5.690205359 | 5.402629401 | 4.8902385    | 5.021296538 | 6.774615647 | 7.183586607 | 4.721524199 | 3.616451274  | 1.655400051 | 5.835651121 | 5.628934287 |
| GMPR      | 4.779677037 | 4.779677037 | 4.779677037 | 4.779677037 | 4.779677037 | 4.779677037 | 4.779677037 | 4.779677037 | 4.779677037 | 4.779677037  | 4.779677037 | 4.779677037 | 4.779677037 | 4.779677037 | 4.779677037  | 4.779677037 | 4.779677037 | 4.779677037 |
| SNK12     | 6.002659052 | 4.92136351  | 5.185076616 | 5.748825117 | 5.152178835 | 5.474572009 | 5.733311349 | 5.244765095 | 5.23455597  | 5.388172205  | 5.295865955 | 4.799017117 | 5.073126017 | 4.892019193 | 5.038580051  | 5.102455545 | 5.64519969  | 5.375098751 |
| FBLM1     | 5.115928326 | 5.158416734 | 4.679496378 | 4.679496378 | 4.679496378 | 4.679496378 | 4.679496378 | 4.679496378 | 4.679496378 | 4.679496378  | 4.679496378 | 4.679496378 | 4.679496378 | 4.679496378 | 4.679496378  | 4.679496378 | 4.679496378 | 4.679496378 |
| PEG10     | 4.694052656 | 4.93033853  | 4.952039424 | 4.93311628  | 6.539934915 | 4.97086518  | 4.97422627  | 6.15687837  | 6.07177742  | 5.091448782  | 4.986103919 | 4.982288243 | 5.019494512 | 5.02786716  | 5.443519807  | 5.385269658 | 5.448140986 | 5.696606149 |
| DNM2H1    | 7.10854817  | 6.156973831 | 4.608604171 | 5.711905169 | 4.635562814 | 4.635562814 | 4.635562814 | 4.635562814 | 4.635562814 | 4.635562814  | 4.635562814 | 4.635562814 | 4.635562814 | 4.635562814 | 4.635562814  | 4.635562814 | 4.635562814 | 4.635562814 |
| ADAT3     | 4.749174955 | 5.443768568 | 4.747435497 | 4.747435497 | 4.747435497 | 4.747435497 | 4.747435497 | 4.747435497 | 4.747435497 | 4.747435497  | 4.747435497 | 4.747435497 | 4.747435497 | 4.747435497 | 4.747435497  | 4.747435497 | 4.747435497 | 4.747435497 |
| ADSS1     | 6.403783379 | 4.712095208 | 5.521745891 | 4.714897469 | 4.708086153 | 5.687582978 | 4.803973313 | 5.039733313 | 5.93646806  | 5.897023875  | 4.74066774  | 4.808812766 | 4.752919529 | 4.735847586 | 5.860689866  | 5.03821327  | 5.26776194  | 5.62483875  |
| ARAP2     | 4.706099318 | 4.702421897 | 6.527872058 | 4.99544818  | 4.827508783 | 4.807306495 | 4.706226353 | 5.788031526 | 5.474824329 | 5.575751362  | 5.400753977 | 4.704066225 | 4.92039158  | 4.709813481 | 6.045368375  | 5.91448809  | 5.96909439  | 6.32434886  |
| ABCQ2     | 4.562303821 | 4.857644542 | 6.840234699 | 4.65408782  | 4.560508285 | 4.5626738   | 6.825890626 | 5.216621288 | 5.088320818 | 5.726952207  | 5.178844226 | 4.865429005 | 5.182378944 | 5.649554403 | 5.364197109  | 7.841077791 |             |             |
| KIAA0895L | 5.101828313 | 5.249554201 | 5.704004774 | 5.10255447  | 5.042990413 | 5.10255447  | 5.094020558 | 5.7882575   | 5.328134283 | 5.5857048518 | 4.077449728 | 5.135894641 | 5.068730795 | 5.118217951 | 6.123076059  | 5.632697357 | 5.764281939 | 5.977013558 |
| CLIP2     | 4.742117569 | 4.830797844 | 4.830797844 | 4.830797844 | 4.830797844 | 4.830797844 | 4.830797844 | 4.830797844 | 4.830797844 | 4.830797844  | 4.830797844 | 4.830797844 | 4.830797844 | 4.830797844 | 4.830797844  | 4.830797844 | 4.830797844 | 4.830797844 |
| CAMK4     | 4.751962806 | 4.73377907  | 4.73377907  | 4.73377907  | 4.73377907  | 4.73377907  | 4.73377907  | 4.73377907  | 4.73377907  | 4.73377907   | 4.73377907  | 4.73377907  | 4.73377907  | 4.73377907  | 4.73377907   | 4.73377907  | 4.73377907  | 4.73377907  |
| DNM3      | 4.730786681 | 4.730786681 | 4.730786681 | 4.730786681 | 4.730786681 | 4.730786681 | 4.730786681 | 4.730786681 | 4.730786681 | 4.730786681  | 4.730786681 | 4.730786681 | 4.730786681 | 4.730786681 | 4.730786681  | 4.730786681 | 4.730786681 | 4.730786681 |
| FN1       | 4.87351961  | 4.830248018 | 4.75252501  | 5.138971291 | 5.23507048  | 4.86310815  | 4.942541745 | 4.489209088 | 4.802734302 | 5.257256926  | 5.990290424 | 4.918819999 | 4.848289126 | 5.913943555 | 6.12521861   | 5.550724067 | 0.081611424 | 0.630491828 |
| BCO2      | 5.498031515 | 5.109318774 | 4.874474849 | 5.145650121 | 4.880043672 | 5.735101814 | 4.917778528 | 5.607395632 | 5.381972215 | 5.56897407   | 5.507856309 | 4.935347913 | 4.871767899 | 4.954425433 | 5.102746765  | 5.222276709 | 5.846128885 | 5.027575616 |
| SPHK1     | 4.702317597 | 4.960135907 | 5.340229841 | 4.736435815 | 4.703135992 | 4.94621709  | 5.264079169 | 5.70508434  | 5.160999273 | 5.701232456  | 4.700588001 | 5.86387193  | 4.705535744 | 6.104477876 | 5.585274666  | 5.197903043 | 6.016939393 | 6.169939393 |
| TMEM53    | 4.966386883 | 4.968582367 | 4.948772948 | 5.389839529 | 5.217463571 | 4.959037436 | 5.086889965 | 5.197850433 | 5.393358383 | 5.889692487  | 5.147111946 | 4.982521375 | 5.114314028 | 5.029033515 | 5.297287562  | 5.362339028 | 5.464137724 | 5.709269438 |
| RMS2      | 5.066778566 | 5.146515539 | 5.149494057 | 6.056680478 | 5.16803711  | 5.064819254 | 5.70682844  | 5.721758299 | 5.097463798 | 6.093240207  | 5.460615983 | 5.059990491 | 5.080146801 | 5.191721239 | 5.898224247  | 5.073900800 | 6.02876078  | 6.02876078  |
| ZNF717    | 5.324981139 | 5.081527158 | 5.117831138 | 4.718552099 | 4.806282327 | 5.70062942  | 5.91204242  | 5.241144842 | 5.46937666  | 5.31158976   | 5.061517183 | 4.713477142 | 4.790072442 | 4.793967416 | 4.735073562  | 5.167320562 | 5.188852099 | 5.300748009 |
| ACTN3B    | 5.596901108 | 5.549235201 | 4.958678651 | 4.986499446 | 5.07145414  | 5.07145414  | 5.102616214 | 5.246393151 | 5.176384534 | 5.306544584  | 5.01411987  | 5.918120764 | 5.187058825 | 5.089894244 | 5.400012076  | 5.384969129 | 5.279591149 | 5.389656902 |
| ZNF14     | 4.97748454  | 4.937196574 | 4.93196574  | 4.93196574  | 4.93196574  | 4.93196574  | 4.93196574  | 4.93196574  | 4.93196574  | 4.93196574   | 4.93196574  | 4.93196574  | 4.93196574  | 4.93196574  | 4.93196574   | 4.93196574  | 4.93196574  | 4.93196574  |
| TUBB3     | 4.946983912 | 5.125324709 | 4.828006513 | 4.80144555  | 4.821590733 | 5.54428804  | 4.846259593 | 5.565258048 | 5.069528063 | 5.430698395  | 4.898514057 | 4.995547819 | 5.421315144 | 5.808135051 | 5.820654607  | 5.259921359 | 5.221785518 | 5.503319224 |
| THN11     | 6.382411392 | 4.68502916  | 6.366560157 | 5.97190195  | 4.912023408 | 4.70989424  | 5.271690727 | 5.508937161 | 5.212929426 | 5.563595163  | 4.913563082 | 4.94782527  | 4.932959115 | 4.83141762  | 5.910197363  | 5.15642908  | 5.458198754 | 5.458198754 |
| CFD       | 5.058120050 | 5.849691882 | 5.719865307 | 4.788250848 | 4.884362723 | 5.723204907 | 5.153182385 | 5.136324729 | 5.078960278 | 5.189225869  | 4.960271604 | 5.717069905 | 4.825213531 | 4.840902629 | 5.597278402  | 5.304540776 | 5.254293122 | 5.564979846 |
| NR3C2     | 5.215572592 | 5.30396427  | 4.780202343 | 5.072603145 | 5.361402429 | 4.709779426 | 5.240832199 | 5.414744742 | 5.338635104 | 5.312978021  | 4.708797643 | 4.70884798  | 5.736386587 | 5.04643371  | 5.034360939  | 5.124580552 | 5.527504084 | 5.527504084 |
| PHN1Y     | 5.774830974 | 4.827647084 | 4.881866064 | 5.789006201 | 5.890805151 | 4.814096052 | 4.827239969 | 5.254243658 | 5.638506863 | 5.130098488  | 5.185735256 | 5.691869424 | 4.826277413 | 4.833257169 | 5.1147135025 | 5.119662943 | 5.537974126 | 5.952742514 |
| PHF1      | 5.277694878 | 4.940413071 | 5.111291134 | 5.01690262  | 4.94585426  | 4.94585426  | 4.94585426  | 4.94585426  | 4.94585426  | 4.94585426   | 4.94585426  | 4.94585426  | 4.94585426  | 4.94585426  | 4.94585426   | 4.94585426  | 4.94585426  | 4.94585426  |
| DNM3      | 4.932791124 | 4.830851124 | 4.932791124 | 4.830851124 | 4.932791124 | 4.830851124 | 4.932791124 | 4.830851124 | 4.932791124 | 4.830851124  | 4.932791124 | 4.830851124 | 4.932791124 | 4.830851124 | 4.932791124  | 4.830851124 | 4.932791124 | 4.830851124 |
| PBLD      | 5.164140490 | 4.940073007 | 4.91364001  | 5.153388801 | 4.94078065  | 4.868190185 | 4.856420849 | 5.41196451  | 5.006850106 | 5.237978162  | 5.243342486 | 6.41905463  | 5.87218724  | 5.031147575 | 6.123254298  | 5.167278396 | 5.637266999 | 4.717160703 |
| ACRC      | 5.444286275 | 4.726494458 | 4.938008074 | 4.57156341  | 5.056817563 | 4.901088647 | 5.132674671 | 4.989123558 | 5.231156918 | 5.251244364  | 4.760874051 | 6.679185873 | 4.749216347 | 5.402288557 | 4.977902902  | 5.37695454  | 5.37695454  | 5.37695454  |
| ROR2      | 4.692573741 | 4.690248143 | 5.733697962 | 4.875297849 | 5.693141778 | 4.69126835  | 5.814383801 | 5.134705398 | 5.54642444  | 5.575348064  | 5.195682048 | 4.691386197 | 4.691450931 | 4.694751628 | 5.077443705  | 5.310115201 | 5.280963352 | 5.465714937 |
| PPP1R13L  | 5.558770389 | 4.821720863 | 4.821720863 | 4.821720863 | 4.821720863 | 4.821720863 | 4.821720863 | 4.821720863 | 4.821720863 | 4.821720863  | 4.821720863 | 4.821720863 | 4.821720863 | 4.821720863 | 4.821720863  | 4.821720863 | 4.821720863 | 4.821720863 |
| MOCOS     | 7.951556603 | 4.929688122 | 4.939618023 | 4.890871884 | 5.139801512 | 4.801813972 | 4.945109422 | 5.190626448 | 5.500340245 | 6.589541344  | 4.883175701 | 4.831875709 | 4.907299843 | 4.978953041 | 5.185101265  | 5.288662054 | 6.024024863 | 6.024024863 |
| CLCN4     | 5.132105884 | 4.759787168 | 4.965407434 | 5.760867761 | 5.554930332 | 4.690409227 | 5.180520538 | 5.189057593 | 5.599394139 | 5.393122911  | 5.393122911 | 5.393122911 | 5.393122911 | 5.393122911 | 5.393122911  | 5.393122911 | 5.393122911 | 5.393122911 |
| PHF1      | 5.277694878 | 4.940413071 | 5.111291134 | 5.01690262  | 4.94585426  | 4.94585426  | 4.94585426  | 4.94585426  | 4.94585426  | 4.94585426   | 4.94585426  | 4.94585426  | 4.94585426  | 4.94585426  | 4.94585426   | 4.94585426  | 4.94585426  | 4.94585426  |
| RM2       | 5.13796187  | 4.931286145 | 5.119839703 | 5.098549006 | 5.117368029 | 5.124080059 | 5.134880953 | 5.915891059 | 5.495827381 | 5.8499771    |             |             |             |             |              |             |             |             |

|            |             |             |             |              |             |             |               |             |             |             |             |             |             |             |             |             |             |             |
|------------|-------------|-------------|-------------|--------------|-------------|-------------|---------------|-------------|-------------|-------------|-------------|-------------|-------------|-------------|-------------|-------------|-------------|-------------|
| UNCL3C     | 4.864155968 | 4.814527426 | 5.026188354 | 4.766180697  | 4.840207396 | 4.940588518 | 4.843946031   | 5.896912789 | 4.83656859  | 5.883979484 | 5.041086487 | 4.940463401 | 7.779004817 | 5.001088035 | 6.565960152 | 7.049957445 | 6.24122137  | 6.787281221 |
| MAPT       | 5.045967695 | 4.943016968 | 4.988347232 | 4.948299062  | 4.928269926 | 4.971075125 | 5.022079654   | 5.545105478 | 5.538887801 | 5.742347879 | 6.177314326 | 4.87329649  | 5.014436411 | 5.009297226 | 5.035428939 | 4.946809384 | 5.089877458 | 4.989052375 |
| LAPTMM4B   | 4.882850672 | 4.944759672 | 6.0250067   | 5.07722193   | 4.921728125 | 4.84412981  | 4.902000007   | 5.728966315 | 6.19464232  | 5.36480736  | 6.453505817 | 4.882399552 | 4.877298145 | 4.924562547 | 5.748798304 | 5.5800975   | 4.912529292 | 6.767758583 |
| CHKS2R     | 4.53865515  | 5.693485259 | 4.710040193 | 4.575252756  | 5.611270322 | 4.723614001 | 6.240243121   | 5.093715351 | 5.321454147 | 5.31032964  | 5.068344134 | 4.748476608 | 4.582329191 | 4.746278746 | 5.528275317 | 4.935933256 | 5.203466452 | 4.573676266 |
| DLIA       | 4.694550883 | 4.583104652 | 4.698467281 | 4.57255157   | 4.579642514 | 4.703739712 | 5.89020559    | 6.601153663 | 5.594644384 | 5.597081128 | 5.216231716 | 4.82077353  | 5.824721945 | 4.745658694 | 6.795023191 | 5.194746994 | 5.557286668 | 4.644355894 |
| SOCB2P     | 6.128961406 | 6.128961406 | 3.90466379  | 5.24042575   | 5.024598799 | 4.545421206 | 5.4549471249  | 5.108933937 | 4.778110396 | 4.912842655 | 4.984478736 | 6.38000113  | 6.146219646 | 6.39602185  | 6.845374739 | 6.612110185 | 5.00591564  | 12.03355386 |
| ZNF461     | 6.149129444 | 5.012131749 | 6.236784194 | 4.729553762  | 4.873434793 | 4.682922102 | 4.871838396   | 5.220631559 | 4.711270518 | 5.336943308 | 4.989050677 | 4.703023624 | 4.741374303 | 4.975816111 | 5.338493654 | 5.604893078 | 5.294453064 | 5.468163138 |
| KANK2      | 4.823271866 | 4.800936268 | 4.800204013 | 4.829422117  | 4.898627446 | 4.969319387 | 5.006812423   | 5.34079156  | 4.996645344 | 5.004399518 | 4.754466454 | 4.98187283  | 6.213073113 | 5.382379652 | 5.311967271 | 5.25998045  | 5.197162215 | 5.476944784 |
| BTBD19     | 4.676482124 | 4.668353706 | 4.715095374 | 4.694676302  | 4.675974895 | 4.775331889 | 4.701502018   | 6.035845725 | 5.161618378 | 5.668051524 | 5.378694256 | 4.760752896 | 5.400417737 | 4.839270619 | 5.579911186 | 5.380824159 | 5.476794404 | 5.464747784 |
| ADAMDECI   | 4.498802941 | 4.492976441 | 4.492963456 | 4.479605009  | 5.542909142 | 4.500268558 | 4.499000094   | 5.383491206 | 5.147289109 | 5.013545107 | 4.984628317 | 6.054334859 | 4.95814482  | 6.335025399 | 6.72311219  | 4.81425669  | 5.407045259 | 6.96179148  |
| TPSA81     | 4.328093438 | 4.320634263 | 4.328090348 | 4.8223267421 | 5.4700414   | 4.549682068 | 4.823214977   | 6.242652741 | 4.541023991 | 4.290043996 | 4.965246605 | 6.167495666 | 7.436726749 | 5.023157852 | 7.429491038 | 5.372865369 | 4.518914764 | 7.248690229 |
| PHL2       | 4.628725674 | 4.676666249 | 5.415290415 | 4.765397328  | 4.578261803 | 4.588822116 | 5.120033742   | 5.264072633 | 5.401758    | 4.864270341 | 5.371125902 | 6.750212003 | 4.587604948 | 4.785114885 | 6.769927273 | 4.603001116 | 5.539380738 | 11.03821618 |
| TNC        | 4.80852066  | 4.77463316  | 4.746569618 | 4.810745428  | 5.381950187 | 4.805233952 | 5.337753709   | 5.166471816 | 5.4400209   | 5.166471816 | 5.248648749 | 4.663476183 | 4.799465319 | 4.807277775 | 5.382396918 | 4.435924498 | 5.340122096 | 5.733586948 |
| CENPE      | 4.572628736 | 4.570809197 | 4.873764189 | 4.566616471  | 5.201498153 | 5.544053009 | 4.572691777   | 5.230353638 | 5.10007416  | 4.870723004 | 5.247526409 | 4.571621503 | 4.571676399 | 4.574476988 | 5.390233305 | 4.577311755 | 5.339141876 | 5.432282467 |
| PLPP7      | 5.963097347 | 4.69049015  | 5.322476665 | 4.640282404  | 4.916211703 | 4.611948448 | 5.88627715    | 5.295820426 | 5.517250919 | 5.522887945 | 5.376506715 | 5.046515664 | 4.610148341 | 4.61369219  | 4.913188084 | 4.676797556 | 5.089982515 | 4.816997153 |
| ERVMER34-1 | 5.33997457  | 4.678201737 | 4.672728027 | 5.196290915  | 4.761961648 | 4.750092944 | 5.982900502   | 5.321332835 | 4.859731088 | 5.647396693 | 5.435484735 | 4.921434476 | 4.641672907 | 5.831308168 | 5.144254028 | 4.850753196 | 4.952742043 | 5.009821982 |
| PBX3       | 4.542328638 | 4.674972067 | 4.538676178 | 4.530407542  | 5.897760143 | 4.543248931 | 4.896300448   | 5.506165886 | 5.052890862 | 4.937112097 | 5.011629239 | 5.388006227 | 4.540456569 | 6.751510857 | 5.732606737 | 5.479593198 | 5.273872373 | 4.737493857 |
| ZNF439     | 6.082864997 | 4.852525943 | 4.965055556 | 4.889744229  | 4.837312181 | 4.89142805  | 4.883067703   | 5.290212029 | 5.150337856 | 5.422699915 | 4.978149514 | 4.867727392 | 6.2489854   | 4.966589855 | 5.212940023 | 4.952658746 | 4.544145388 | 5.154695711 |
| ZNF418     | 5.858233262 | 4.527954402 | 4.527888168 | 5.412829267  | 5.733254123 | 4.625609312 | 6.628744411   | 5.205915282 | 5.040605738 | 5.576746062 | 5.33572837  | 4.529460557 | 4.529562209 | 4.534725911 | 4.892992371 | 5.116253962 | 4.782928765 | 4.626728334 |
| APBA2      | 4.746825121 | 4.754296153 | 4.776097204 | 4.723102254  | 4.763251869 | 4.768941416 | 4.810395052   | 5.327580279 | 4.737875308 | 4.657173365 | 5.477497137 | 5.070145618 | 5.639941116 | 4.804346449 | 5.297415511 | 5.081446879 | 5.960269693 | 5.584332398 |
| WHTT1      | 4.754995196 | 4.775184232 | 4.02940418  | 4.716706902  | 4.76312227  | 4.894277501 | 4.765253512   | 4.759443661 | 5.443109132 | 4.94248383  | 5.130716365 | 6.003682952 | 4.751962035 | 4.812916341 | 5.812477498 | 5.079517695 | 5.651067316 | 5.6442847   |
| FAMS7A     | 4.575983591 | 4.99070864  | 4.896019819 | 4.955089047  | 4.572771467 | 4.574653902 | 5.745011786   | 5.220145817 | 5.569025422 | 4.877979623 | 5.31315658  | 4.734983841 | 4.575029086 | 4.891820207 | 5.380472412 | 4.966116859 | 4.672623024 | 5.247259565 |
| RIMS1      | 6.547244651 | 4.855394946 | 4.857893555 | 6.158359948  | 4.716110657 | 4.874391179 | 4.877913517   | 6.225503094 | 6.790530503 | 5.847521048 | 6.681401547 | 4.888337064 | 4.882665343 | 4.94181348  | 4.828217676 | 6.152340527 | 5.559340752 | 4.805704532 |
| ZNF597     | 4.765110249 | 4.766548878 | 4.592459065 | 4.944303621  | 4.720670913 | 4.841735109 | 4.59450796    | 5.242314576 | 5.621796551 | 5.301711764 | 5.620176211 | 4.593364942 | 5.107432444 | 4.5964137   | 5.251665365 | 5.38322152  | 4.760754541 | 5.681854852 |
| LYZ        | 4.621651703 | 4.276768787 | 4.283892483 | 5.644868329  | 7.052232259 | 4.761598025 | 7.564639408   | 5.545994472 | 4.192158406 | 4.90667416  | 4.24796349  | 5.503252924 | 4.450738625 | 4.404566619 | 7.689755728 | 4.472427741 | 5.479351173 | 7.923881769 |
| ZNF699     | 5.364789791 | 4.624535987 | 4.624535987 | 4.684692259  | 4.65149688  | 5.803618536 | 4.786283898   | 5.575110778 | 5.277990545 | 5.415724368 | 4.658432647 | 4.728789942 | 6.165711662 | 5.392307117 | 4.947593162 | 5.089844706 | 4.685124434 |             |
| WWC1       | 4.624796718 | 4.68060648  | 5.193027489 | 4.59507173   | 4.600519427 | 4.713082315 | 4.735805648   | 4.985036318 | 5.670961461 | 5.053013246 | 5.006231005 | 4.618618198 | 4.617476801 | 4.635792257 | 5.668857345 | 5.711427415 | 5.349131298 | 6.448448165 |
| APBA2      | 4.746825121 | 4.754296153 | 4.776097204 | 4.723102254  | 4.763251869 | 4.768941416 | 4.810395052   | 5.327580279 | 4.737875308 | 4.657173365 | 5.477497137 | 5.070145618 | 5.639941116 | 4.804346449 | 5.297415511 | 5.081446879 | 5.960269693 | 5.584332398 |
| SEMA6A     | 4.92990042  | 4.496026063 | 4.495982841 | 4.49093566   | 4.821481301 | 4.49879579  | 4.684568351   | 4.882692334 | 4.785346593 | 5.027979495 | 5.063396421 | 5.551640881 | 4.497076226 | 4.50046146  | 5.197274309 | 5.154611011 | 5.646956555 | 5.974906189 |
| PRC1       | 5.795375838 | 4.850506614 | 4.78183937  | 4.754854981  | 4.599099228 | 4.60346112  | 4.796737971   | 5.144830428 | 4.728130521 | 4.715917375 | 5.033449    | 5.680677324 | 4.688497339 | 4.817587831 | 5.387829538 | 5.241153959 | 5.50740628  | 5.8511669   |
| KLHL14     | 6.705895745 | 6.902349027 | 5.700249912 | 4.372314761  | 4.382834235 | 6.04801619  | 4.394751572   | 5.051152528 | 5.341875069 | 5.508717358 | 5.712376969 | 4.390885093 | 4.391084274 | 4.40112343  | 4.368155457 | 4.497105387 | 4.582620727 | 5.265120266 |
| FN1        | 4.76371964  | 4.688195697 | 4.701398525 | 7.334233673  | 4.66346554  | 4.739567633 | 4.769575748   | 5.828108987 | 4.594766383 | 7.461216754 | 4.697524166 | 4.844792332 | 6.135119913 | 4.816337621 | 7.746705947 | 4.640483391 | 5.555614563 | 7.267137871 |
| IL13RA1    | 4.608835851 | 4.578672159 | 4.58667853  | 4.551027613  | 5.573851654 | 4.501804338 | 4.500793641   | 5.831777892 | 5.720839774 | 4.759337515 | 5.785833389 | 5.047329863 | 4.808205582 | 4.50520159  | 6.239645951 | 4.614695553 | 5.358033948 | 6.903947929 |
| SMARCD3    | 4.466602229 | 4.461427365 | 4.461252331 | 4.449280369  | 4.457449957 | 4.467927724 | 6.242859944   | 4.892708659 | 6.391661517 | 4.774028823 | 5.89608677  | 4.46374463  | 4.46390082  | 6.362086217 | 5.184301724 | 6.435144344 | 4.766075489 | 5.645693864 |
| KIR2DL4    | 4.547962176 | 5.796861287 | 4.544429093 | 4.536895944  | 4.541393945 | 4.54860252  | 4.78771754    | 5.452830877 | 4.537425125 | 5.920462622 | 4.741140573 | 4.545954747 | 6.224385751 | 4.551065549 | 5.81421384  | 6.685070857 | 5.699316687 | 5.899170075 |
| GPRC5A     | 4.607321239 | 4.484477007 | 4.322070798 | 3.936012879  | 4.470360886 | 4.325152336 | 7.15361441    | 5.344086201 | 5.43216902  | 5.43216902  | 5.437676827 | 4.318159039 | 4.569235811 | 4.267908229 | 8.146109878 | 4.560302628 | 4.911049605 | 12.19370875 |
| SN2A       | 4.491614412 | 4.488555702 | 4.488495585 | 6.201755042  | 4.486217387 | 4.492400951 | 4.491720128   | 5.63816965  | 5.629056463 | 5.587671398 | 4.48656177  | 4.489922999 | 5.70922901  | 4.404796769 | 5.53538834  | 4.628692424 | 5.474114006 | 5.544086953 |
| RBP2       | 4.402108083 | 2.943455661 | 5.489870101 | 4.966901512  | 4.881093457 | 3.020033362 | 3.007728174   | 3.886740714 | 4.939366189 | 4.18681274  | 6.080114426 | 2.97375236  | 3.061370311 | 5.476382352 | 5.576837011 | 3.949235652 | 9.981475648 |             |
| CFB        | 4.402873107 | 6.53919691  | 4.391787736 | 4.365865622  | 4.383544193 | 4.406533183 | 5.904689125   | 6.700794491 | 4.367728273 | 4.36679032  | 4.384813214 | 6.714517174 | 4.397217836 | 4.413645046 | 7.00730736  | 6.003283549 | 6.232093621 | 7.553618762 |
| SPINK4     | 4.034781368 | 4.017367061 | 4.017018934 | 4.086857892  | 4.516440051 | 5.609038262 | 4.476871653   | 6.04357183  | 4.953599866 | 4.065704894 | 4.264016626 | 6.535792889 | 4.025749056 | 6.537218837 | 11.22028442 | 4.259183644 | 3.988711756 | 6.347347381 |
| CLU        | 3.762207074 | 3.832087074 | 3.841580411 | 3.817885221  | 3.862678952 | 3.995244889 | 3.749902731   | 5.156174032 | 3.593556373 | 5.096019123 | 5.598125621 | 3.764099139 | 10.77664321 | 4.191513492 | 8.182708665 | 4.171327741 | 5.074260386 | 11.21268065 |
| EMIP1      | 5.460215183 | 4.01539648  | 4.0062982   | 4.00645304   | 4.088023947 | 4.228746406 | 6.268875643</ |             |             |             |             |             |             |             |             |             |             |             |

### Genes that are differentially expressed in both comparisons - nonTG2 (CeD) vs disease controls and TG2 (CeD) vs disease controls. Negative fold-change indicates increased expression in CeD patients.

| Gene    | ENSEMBL_ID      | baseMean_contVSnontg2 | log2FC_contVSnontg2 | lfcSE_contVSnontg2 | stat_contVSnontg2 | pvalue_contVSnontg2 | padj_contVSnontg2 | baseMean_contVStg2 | log2FC_contVStg2 | lfcSE_contVStg2 | stat_contVStg2 | pvalue_contVStg2 | padj_contVStg2 |
|---------|-----------------|-----------------------|---------------------|--------------------|-------------------|---------------------|-------------------|--------------------|------------------|-----------------|----------------|------------------|----------------|
| NFYA    | ENSG00000001167 | 249.028               | -1.338              | 0.328              | -4.1104           | 0                   | 0.004376605       | 247.418            | -1.337           | 0.376           | -3.587         | 3.00E-04         | 0.015194293    |
| TFPI    | ENSG00000003436 | 214.428               | -1.042              | 0.333              | -3.1555           | 0.0016              | 0.054234606       | 354.926            | -1.445           | 0.425           | -3.5063        | 5.00E-04         | 0.018891928    |
| MAP3K9  | ENSG00000006432 | 204.462               | -2.037              | 0.389              | -6.026            | 0                   | 2.24E-06          | 159.199            | -1.63            | 0.452           | -4.2725        | 0                | 0.001748693    |
| CRY1    | ENSG00000008405 | 148.77                | -1.612              | 0.392              | -5.202            | 0                   | 8.41E-05          | 210.046            | -1.952           | 0.452           | -5.4817        | 0                | 1.36E-05       |
| GRN     | ENSG00000030582 | 1890.507              | -0.817              | 0.19               | -4.2939           | 0                   | 0.002563053       | 1710.36            | -0.637           | 0.215           | -2.9587        | 0.0031           | 0.067307278    |
| RELT    | ENSG00000054967 | 587.668               | -1.177              | 0.377              | -3.2165           | 0.0013              | 0.048045374       | 689.796            | -1.565           | 0.398           | -3.9959        | 1.00E-04         | 0.004585119    |
| RASGRF1 | ENSG00000058335 | 126.781               | -1.458              | 0.392              | -4.5852           | 0                   | 0.000879515       | 76.636             | -1.129           | 0.448           | -2.9977        | 0.0027           | 0.016909726    |
| SLC2A3  | ENSG00000059804 | 400.457               | -1.35               | 0.376              | -3.719            | 2.00E-04            | 0.013846386       | 530.567            | -1.871           | 0.402           | -4.76907       | 0                | 0.000298047    |
| TNPO3   | ENSG00000064419 | 231.83                | -1.386              | 0.37               | -3.8477           | 1.00E-04            | 0.009705204       | 237.874            | -1.766           | 0.352           | -5.0478        | 0                | 9.85E-05       |
| ANKS1A  | ENSG00000064999 | 91.433                | -1.388              | 0.386              | -3.7875           | 2.00E-04            | 0.011428329       | 124.124            | -1.814           | 0.432           | -4.3982        | 0                | 0.001131511    |
| DIP2B   | ENSG00000066084 | 110.7                 | -1.295              | 0.372              | -3.5609           | 4.00E-04            | 0.021414858       | 131.731            | -1.582           | 0.414           | -3.9019        | 1.00E-04         | 0.005937364    |
| ATG2B   | ENSG00000066739 | 271.108               | -1.303              | 0.387              | -3.5623           | 4.00E-04            | 0.021414858       | 301.316            | -1.373           | 0.446           | -3.2804        | 0.001            | 0.038355555    |
| PFKP    | ENSG00000067057 | 71.563                | -1.103              | 0.385              | -3.5549           | 4.00E-04            | 0.021559757       | 79.177             | -0.88            | 0.426           | -2.7924        | 0.0052           | 0.094503178    |
| HYAL2   | ENSG00000068001 | 62.324                | -0.821              | 0.361              | -3.2498           | 0.0012              | 0.044778332       | 149.141            | -1.886           | 0.452           | -5.5092        | 0                | 1.20E-05       |
| BCL3    | ENSG00000069399 | 750.689               | -1.03               | 0.283              | -3.6455           | 3.00E-04            | 0.016991472       | 703.811            | -0.947           | 0.314           | -3.0195        | 0.0025           | 0.059805182    |
| PPIE    | ENSG00000080472 | 628.713               | 0.867               | 0.282              | 3.0657            | 0.0022              | 0.066597211       | 618.592            | 0.927            | 0.309           | 2.9914         | 0.0028           | 0.06293759     |
| ICAM1   | ENSG00000090339 | 3463.472              | -1.016              | 0.296              | -3.4469           | 6.00E-04            | 0.028401852       | 3385.512           | -1.027           | 0.309           | -3.3305        | 9.00E-04         | 0.02948415     |
| USP48   | ENSG00000090686 | 2088.01               | -0.988              | 0.203              | -4.859            | 0                   | 0.000336026       | 2225.034           | -1.103           | 0.224           | -4.9165        | 0                | 0.000169316    |
| ORC6    | ENSG00000091651 | 101.307               | -1.201              | 0.38               | -3.2573           | 0.0011              | 0.044643759       | 132.625            | -1.605           | 0.442           | -3.9215        | 1.00E-04         | 0.005590858    |
| HSD3B7  | ENSG00000099377 | 57.452                | -1.055              | 0.387              | -3.246            | 0.0012              | 0.044896948       | 81.251             | -1.758           | 0.45            | -4.3649        | 0                | 0.001268675    |
| GRK3    | ENSG00000100077 | 80.357                | -1.418              | 0.393              | -4.2477           | 0                   | 0.002879182       | 75.869             | -1.677           | 0.45            | -4.1616        | 0                | 0.002676937    |
| PYGB    | ENSG00000100994 | 2181.837              | 0.807               | 0.223              | 3.6208            | 3.00E-04            | 0.018316615       | 2254.222           | 0.72             | 0.256           | 2.8113         | 0.0049           | 0.090047606    |
| SLC7A5  | ENSG00000103257 | 9830.885              | -1.354              | 0.276              | -4.9155           | 0                   | 0.000295116       | 9351.023           | -1.299           | 0.308           | -4.2349        | 0                | 0.002033832    |
| IL21R   | ENSG00000103522 | 518.446               | -2.008              | 0.364              | -5.7457           | 0                   | 8.13E-06          | 578.546            | -1.976           | 0.431           | -4.8621        | 0                | 0.000203031    |
| SLC30A4 | ENSG00000104154 | 736.941               | 0.804               | 0.228              | 3.5225            | 4.00E-04            | 0.023140233       | 726.967            | 0.843            | 0.26            | 3.2381         | 0.0012           | 0.037361398    |
| AHR     | ENSG00000106546 | 76.695                | -1.801              | 0.392              | -5.3304           | 0                   | 4.75E-05          | 87.276             | -1.875           | 0.451           | -4.9114        | 0                | 0.000169316    |
| MAP3K8  | ENSG00000107968 | 938.191               | -0.956              | 0.239              | -4.0024           | 1.00E-04            | 0.006191079       | 1127.47            | -1.27            | 0.259           | -4.9027        | 0                | 0.000171059    |
| RASD1   | ENSG00000108551 | 1303.966              | 1.092               | 0.225              | 4.841             | 0                   | 0.000336026       | 976.559            | 2.116            | 0.314           | 6.7167         | 0                | 1.65E-08       |
| SLAIN2  | ENSG00000109171 | 529.465               | -0.911              | 0.276              | -3.309            | 9.00E-04            | 0.03960488        | 534.374            | -0.976           | 0.267           | -3.6517        | 3.00E-04         | 0.012524527    |
| VWASA   | ENSG00000110002 | 170.065               | -1.098              | 0.393              | -3.1015           | 0.0019              | 0.060734113       | 216.587            | -1.311           | 0.452           | -3.2484        | 0.0012           | 0.036875123    |
| GPRC5D  | ENSG00000111291 | 1128.942              | 1.298               | 0.284              | 4.5569            | 0                   | 0.000971246       | 1011.984           | 1.628            | 0.354           | 4.5725         | 0                | 0.000643001    |
| DSE     | ENSG00000111817 | 124.545               | 1.552               | 0.385              | 3.9355            | 1.00E-04            | 0.007630162       | 114.892            | 2.037            | 0.433           | 4.5972         | 0                | 0.000590349    |
| PTP4A1  | ENSG00000112245 | 2499.22               | -1.006              | 0.26               | -3.872            | 1.00E-04            | 0.009284367       | 2537.987           | -1.032           | 0.299           | -3.4585        | 5.00E-04         | 0.021717843    |
| CPEB4   | ENSG00000113742 | 2329.328              | -1.069              | 0.237              | -4.5154           | 0                   | 0.001142011       | 2496.392           | -1.166           | 0.285           | -4.094         | 0                | 0.003371576    |
| ACTR8   | ENSG00000113812 | 299.999               | -1.064              | 0.382              | -2.8822           | 0.0039              | 0.096138316       | 316.023            | -1.289           | 0.414           | -3.1808        | 0.0015           | 0.042030051    |
| BCL6    | ENSG00000113916 | 54.07                 | -1.636              | 0.388              | -6.421            | 0                   | 2.41E-07          | 78.587             | -2.809           | 0.449           | -7.2697        | 0                | 7.69E-10       |
| KAT2B   | ENSG00000114166 | 513.693               | -0.998              | 0.262              | -3.8073           | 1.00E-04            | 0.01101642        | 469.083            | -0.858           | 0.296           | -2.9           | 0.0037           | 0.076027625    |
| C3orf52 | ENSG00000114529 | 72.259                | -1.478              | 0.386              | -5.6371           | 0                   | 1.23E-05          | 127.897            | -2.027           | 0.452           | -6.405         | 0                | 1.07E-07       |
| ACVR1   | ENSG00000115170 | 233.635               | -1.508              | 0.309              | -4.8983           | 0                   | 0.000303176       | 257.236            | -1.585           | 0.371           | -4.3069        | 0                | 0.001578047    |
| STAT1   | ENSG00000115415 | 6491.514              | -0.955              | 0.27               | -3.5502           | 4.00E-04            | 0.021722754       | 7164.649           | -1.165           | 0.264           | -4.4233        | 0                | 0.001030205    |
| PLEKH2  | ENSG00000115762 | 383.337               | -1.189              | 0.315              | -3.7918           | 1.00E-04            | 0.011428329       | 399.253            | -1.253           | 0.36            | -3.5042        | 5.00E-04         | 0.018891928    |
| SFPQ    | ENSG00000116560 | 1542.797              | -0.823              | 0.253              | -3.2509           | 0.0012              | 0.044778332       | 1547.097           | -0.849           | 0.266           | -3.1934        | 0.0014           | 0.040843893    |
| GADD45A | ENSG00000116717 | 3873.941              | -1.673              | 0.282              | -5.9592           | 0                   | 3.00E-06          | 5468.555           | -2.222           | 0.296           | -7.548         | 0                | 1.57E-10       |
| ETV3    | ENSG00000117036 | 595.586               | -0.911              | 0.306              | -2.9852           | 0.0028              | 0.079617297       | 775.472            | -1.336           | 0.329           | -4.0772        | 0                | 0.003552424    |
| PIK3R3  | ENSG00000117461 | 100.432               | -1.445              | 0.393              | -4.2851           | 0                   | 0.002563053       | 188.667            | -3.243           | 0.385           | -8.5497        | 0                | 1.32E-13       |
| SYF2    | ENSG00000117614 | 1067.778              | 0.917               | 0.244              | 3.7512            | 2.00E-04            | 0.012903937       | 1015.803           | 1.064            | 0.277           | 3.8307         | 1.00E-04         | 0.007142571    |
| LGALS1  | ENSG00000119862 | 653.363               | -1.523              | 0.366              | -4.2862           | 0                   | 0.002563053       | 630.228            | -1.41            | 0.431           | -3.3919        | 7.00E-04         | 0.025462477    |
| GNA13   | ENSG00000120063 | 1566.612              | -1.265              | 0.343              | -3.7344           | 2.00E-04            | 0.013427167       | 1483.53            | -1.202           | 0.394           | -3.0893        | 0.002            | 0.051775537    |
| EGR1    | ENSG00000120738 | 9346.843              | 1.059               | 0.247              | 4.2883            | 0                   | 0.002563053       | 8422.916           | 1.446            | 0.239           | 6.0522         | 0                | 8.47E-07       |
| DUSP4   | ENSG00000120875 | 666.946               | -2.614              | 0.364              | -7.6124           | 0                   | 9.56E-11          | 819.238            | -3.113           | 0.394           | -8.2049        | 0                | 1.23E-12       |
| NAA50   | ENSG00000121579 | 1091.202              | -0.803              | 0.277              | -2.905            | 0.0037              | 0.091929974       | 1092.838           | -0.83            | 0.294           | -2.8312        | 0.0046           | 0.087014535    |
| LY9     | ENSG00000122224 | 5020.083              | -0.891              | 0.271              | -3.2872           | 0.001               | 0.041347216       | 5081.371           | -0.922           | 0.302           | -3.063         | 0.0022           | 0.054648759    |
| MED13L  | ENSG00000123066 | 606.925               | -1.814              | 0.321              | -5.7117           | 0                   | 9.18E-06          | 558.774            | -1.614           | 0.393           | -4.1781        | 0                | 0.002551353    |
| ADGRE5  | ENSG00000123146 | 2586.673              | -1.337              | 0.29               | -4.6304           | 0                   | 0.000734408       | 3139.512           | -1.566           | 0.35            | -4.5109        | 0                | 0.000782923    |
| FGL2    | ENSG00000127951 | 1882.792              | -0.986              | 0.337              | -2.9476           | 0.0032              | 0.08538349        | 2270.246           | -1.323           | 0.354           | -3.7631        | 2.00E-04         | 0.008737786    |
| KRI1    | ENSG00000129347 | 301.871               | 0.953               | 0.285              | 3.3385            | 8.00E-04            | 0.036661157       | 299.315            | 1.002            | 0.308           | 3.2438         | 0.0012           | 0.037296581    |
| RAB2B   | ENSG00000129472 | 317.024               | -1.177              | 0.32               | -3.6989           | 2.00E-04            | 0.014799016       | 321.204            | -1.249           | 0.345           | -3.6355        | 3.00E-04         | 0.013162267    |
| ZNF331  | ENSG00000130844 | 3036.43               | -1.376              | 0.286              | -4.8286           | 0                   | 0.000349123       | 2516.247           | -1.181           | 0.27            | -4.3726        | 0                | 0.001242822    |
| AAR2    | ENSG00000131043 | 383.883               | 1.273               | 0.361              | 3.4826            | 5.00E-04            | 0.026087251       | 441.436            | 1.091            | 0.318           | 3.4283         | 6.00E-04         | 0.023650229    |
| PPFIA1  | ENSG00000131626 | 283.26                | -1.116              | 0.324              | -3.462            | 5.00E-04            | 0.027329349       | 281.394            | -1.169           | 0.345           | -3.4019        | 7.00E-04         | 0.025069496    |
| TRIM5   | ENSG00000132256 | 124.627               | -1.464              | 0.36               | -4.1447           | 0                   | 0.004013959       | 112.267            | -1.24            | 0.432           | -2.9505        | 0.0032           | 0.068565133    |
| AP3B1   | ENSG00000132842 | 842.423               | -0.926              | 0.263              | -3.5341           | 4.00E-04            | 0.022377237       | 855.86             | -0.962           | 0.293           | -3.2893        | 0.001            | 0.032986629    |
| CASP9   | ENSG00000132906 | 95.548                | -1.087              | 0.378              | -2.9597           | 0.0031              | 0.083976825       | 114.131            | -1.25            | 0.436           | -2.971         | 0.003            | 0.065471236    |
| PIK3C2B | ENSG00000133056 | 103.478               | -1.363              | 0.39               | -3.7644           | 2.00E-04            | 0.012363243       | 134.96             | -1.632           | 0.446           | -3.9728        | 1.00E-04         | 0.004861448    |
| SBF2    | ENSG00000133812 | 134.375               | -1.41               | 0.392              | -3.9638           | 1.00E-04            | 0.006927275       | 126.092            | -1.385           | 0.451           | -3.3647        | 8.00E-04         | 0.027361807    |
| EDEM1   | ENSG00000134109 | 4688.356              | -1.139              | 0.276              | -4.1382           | 0                   | 0.004013959       | 4593.271           | -1.132           | 0.3             | -3.7847        | 2.00E-04         | 0.008193687    |
| APC     | ENSG00000134982 | 402.697               | -1.327              | 0.339              | -3.9628           | 1.00E-04            | 0.006927275       | 330.511            | -1.12            | 0.375           | -3.0114        | 0.0026           | 0.060345118    |
| AHI1    | ENSG00000135541 | 389.577               | -1.045              | 0.307              | -3.4174           | 6.00E-04            | 0.030358225       | 507.934            | -1.464           | 0.332           | -4.4267        | 0                | 0.001030205    |
| CKAP2   | ENSG00000136108 | 144.097               | -1.268              | 0.367              | -3.5343           | 4.00E-04            | 0.022377237       | 233.156            | -1.729           | 0.425           | -4.2279        | 0                | 0.002081362    |

|             |                 |           |        |        |         |          |             |           |        |       |         |          |             |
|-------------|-----------------|-----------|--------|--------|---------|----------|-------------|-----------|--------|-------|---------|----------|-------------|
| UGGT1       | ENSG00000136731 | 1209.869  | -1.323 | 0.318  | -4.1954 | 0        | 0.003377505 | 1037.93   | -1.162 | 0.344 | -3.3922 | 7.00E-04 | 0.025462477 |
| IL11RA      | ENSG00000137070 | 74.118    | -1.352 | 0.388  | -4.5502 | 0        | 0.000985511 | 49.919    | -0.898 | 0.426 | -2.8649 | 0.0042   | 0.082035581 |
| SLC05A1     | ENSG00000137571 | 119.559   | -1.993 | 0.353  | -5.7664 | 0        | 7.85E-06    | 94.334    | -1.151 | 0.452 | -2.7805 | 0.0054   | 0.096636178 |
| ADAM10      | ENSG00000137845 | 963.842   | -1.076 | 0.277  | -3.8905 | 1.00E-04 | 0.008671762 | 964.203   | -1.11  | 0.295 | -3.7733 | 2.00E-04 | 0.008470362 |
| FNBP1L      | ENSG00000137942 | 68.811    | -1.734 | 0.39   | -6.7519 | 0        | 3.89E-08    | 25.754    | -0.54  | 0.357 | -3.6381 | 3.00E-04 | 0.013088435 |
| GAS8        | ENSG00000141013 | 78.154    | -1.09  | 0.3879 | -3.3879 | 7.00E-04 | 0.031288694 | 124.422   | -1.358 | 0.449 | -3.8026 | 1.00E-04 | 0.007880226 |
| PIK3R5      | ENSG00000141506 | 95.605    | -3.226 | 0.384  | -8.0887 | 0        | 6.43E-12    | 102.625   | -2.26  | 0.452 | -7.153  | 0        | 1.13E-09    |
| TMEM91      | ENSG00000142046 | 40.351    | -1.534 | 0.393  | -4.4936 | 0        | 0.001230358 | 31.442    | -1.284 | 0.451 | -3.2969 | 0.001    | 0.032337694 |
| RGS16       | ENSG00000143333 | 780.331   | 0.91   | 0.273  | 3.333   | 9.00E-04 | 0.036794754 | 730.495   | 1.133  | 0.285 | 3.9758  | 1.00E-04 | 0.004831785 |
| FBXO28      | ENSG00000143756 | 228.38    | -1.388 | 0.362  | -3.9241 | 1.00E-04 | 0.007734453 | 266.471   | -1.624 | 0.405 | -4.101  | 0        | 0.00326712  |
| GIN1        | ENSG00000145723 | 45.725    | -1.209 | 0.388  | -3.8386 | 1.00E-04 | 0.009917352 | 69.685    | -1.561 | 0.451 | -4.3194 | 0        | 0.001504749 |
| TBC1D7      | ENSG00000145979 | 259.93    | 1.192  | 0.333  | 3.5559  | 4.00E-04 | 0.021559757 | 263.599   | 1.235  | 0.345 | 3.5671  | 4.00E-04 | 0.015862536 |
| TACC1       | ENSG00000147526 | 761.892   | -0.94  | 0.258  | -3.6474 | 3.00E-04 | 0.016991472 | 844.999   | -1.1   | 0.3   | -3.6736 | 2.00E-04 | 0.011602925 |
| FAM171A1    | ENSG00000148468 | 88.291    | -2.874 | 0.389  | -7.814  | 0        | 2.95E-11    | 81.824    | -1.112 | 0.425 | -5.6866 | 0        | 5.12E-06    |
| FADS1       | ENSG00000149485 | 426.281   | 1.092  | 0.342  | 3.1713  | 0.0015   | 0.053396916 | 376.334   | 1.281  | 0.434 | 2.9014  | 0.0037   | 0.075826764 |
| MTMR12      | ENSG00000150712 | 506.184   | -1.289 | 0.28   | -4.614  | 0        | 0.000780006 | 503.73    | -1.17  | 0.374 | -3.1488 | 0.0016   | 0.045258114 |
| CRIM1       | ENSG00000150938 | 214.517   | -1.103 | 0.368  | -3.0654 | 0.0022   | 0.066597211 | 262.016   | -1.216 | 0.436 | -2.8879 | 0.0039   | 0.077831169 |
| USP12       | ENSG00000152484 | 370.246   | -1.313 | 0.304  | -4.3423 | 0        | 0.002179246 | 426.731   | -1.389 | 0.387 | -3.6293 | 3.00E-04 | 0.013362278 |
| BCL2L11     | ENSG00000153094 | 1397.194  | -1.355 | 0.279  | -4.8635 | 0        | 0.000336026 | 1609.812  | -1.626 | 0.286 | -5.7011 | 0        | 4.89E-06    |
| NR4A2       | ENSG00000153234 | 3249.843  | -1.383 | 0.251  | -5.51   | 0        | 2.04E-05    | 2701.203  | -1.042 | 0.331 | -3.163  | 0.0016   | 0.043869942 |
| LRRK1       | ENSG00000154237 | 721.655   | -0.992 | 0.307  | -3.2472 | 0.0012   | 0.044858991 | 913.794   | -1.403 | 0.315 | -4.4687 | 0        | 0.000909023 |
| PLCL2       | ENSG00000154822 | 469.464   | -1.106 | 0.292  | -3.7931 | 1.00E-04 | 0.011428329 | 464.672   | -1.086 | 0.34  | -3.2101 | 0.0013   | 0.039640111 |
| RGS12       | ENSG00000159788 | 86.712    | -1.794 | 0.389  | -5.0929 | 0        | 0.000129676 | 50.067    | -1.145 | 0.452 | -2.841  | 0.0045   | 0.085562541 |
| CDC42EP3    | ENSG00000163171 | 482.06    | -1.31  | 0.303  | -4.3478 | 0        | 0.002156563 | 448.326   | -1.202 | 0.352 | -3.4301 | 6.00E-04 | 0.023650229 |
| SERPIN1     | ENSG00000163536 | 591.147   | -1.135 | 0.269  | -4.2196 | 0        | 0.00318246  | 593.885   | -1.113 | 0.329 | -3.393  | 7.00E-04 | 0.025462477 |
| DTX3L       | ENSG00000163840 | 122.127   | -1.11  | 0.392  | -3.0957 | 0.002    | 0.060857529 | 161.463   | -1.432 | 0.447 | -3.4936 | 5.00E-04 | 0.019490774 |
| ANKRD33B    | ENSG00000164236 | 57.1      | -0.967 | 0.38   | -3.166  | 0.0015   | 0.054027887 | 76.631    | -1.163 | 0.444 | -3.3346 | 9.00E-04 | 0.029606699 |
| UTP15       | ENSG00000164338 | 107.395   | -2.121 | 0.357  | -6.089  | 0        | 1.73E-06    | 180.024   | -2.753 | 0.399 | -7.1105 | 0        | 1.37E-09    |
| TAGAP       | ENSG00000164691 | 6655.546  | -0.835 | 0.245  | -3.4075 | 7.00E-04 | 0.030740964 | 6637.583  | -0.863 | 0.238 | -3.6301 | 3.00E-04 | 0.013362278 |
| TP53INP1    | ENSG00000164938 | 7123.694  | -0.812 | 0.207  | -3.9299 | 1.00E-04 | 0.007734453 | 8826.131  | -1.151 | 0.263 | -4.3715 | 0        | 0.001242822 |
| CFL2        | ENSG00000165410 | 1493.965  | -1.593 | 0.3    | -5.3519 | 0        | 4.42E-05    | 993.966   | -1.034 | 0.339 | -3.0579 | 0.0022   | 0.055211923 |
| RP11-382A21 | ENSG00000166503 | 97.874    | -1.288 | 0.39   | -4.0542 | 1.00E-04 | 0.005158556 | 60.141    | -1.113 | 0.45  | -2.8521 | 0.0043   | 0.083992435 |
| DPEP2       | ENSG00000167261 | 339.594   | 1.057  | 0.352  | 2.9736  | 0.0029   | 0.081719817 | 285.806   | 1.007  | 0.441 | 3.0543  | 0.0023   | 0.055605955 |
| THAP11      | ENSG00000168286 | 612.001   | 1.042  | 0.249  | 4.1798  | 0        | 0.003575269 | 597.945   | 1.086  | 0.309 | 3.504   | 5.00E-04 | 0.018891928 |
| POLR3D      | ENSG00000168495 | 558.879   | 0.903  | 0.248  | 3.6447  | 3.00E-04 | 0.016991472 | 510.253   | 1.17   | 0.286 | 4.0797  | 0        | 0.003538853 |
| GPR183      | ENSG00000169508 | 764.205   | -1.143 | 0.32   | -3.5916 | 3.00E-04 | 0.019799503 | 782.389   | -1.167 | 0.372 | -3.1615 | 0.0016   | 0.043926173 |
| SYAP1       | ENSG00000169895 | 1575.352  | -0.982 | 0.275  | -3.5721 | 4.00E-04 | 0.020982069 | 1575.327  | -0.958 | 0.335 | -2.8716 | 0.0041   | 0.081023468 |
| SERPINB9    | ENSG00000170542 | 2128.974  | -1.899 | 0.287  | -6.6532 | 0        | 6.12E-08    | 2377.349  | -2.113 | 0.307 | -6.9044 | 0        | 5.38E-09    |
| TPPP        | ENSG00000171368 | 147.22    | -1.86  | 0.392  | -5.6425 | 0        | 1.23E-05    | 88.98     | -1.092 | 0.441 | -3.1555 | 0.0016   | 0.044651832 |
| PRNP        | ENSG00000171867 | 1589.005  | -1.092 | 0.301  | -3.6466 | 3.00E-04 | 0.016991472 | 1331.351  | -0.899 | 0.287 | -3.1385 | 0.0017   | 0.046015715 |
| RND1        | ENSG00000172602 | 288.981   | -1.326 | 0.337  | -3.982  | 1.00E-04 | 0.006625046 | 270.099   | -1.232 | 0.39  | -3.1895 | 0.0014   | 0.041125179 |
| KAT5        | ENSG00000172977 | 773.631   | 1.076  | 0.259  | 4.1405  | 0        | 0.004013959 | 836.617   | 0.896  | 0.247 | 3.6219  | 3.00E-04 | 0.013694447 |
| HSPA6       | ENSG00000173110 | 3454.466  | -1.116 | 0.393  | -3.1079 | 0.0019   | 0.06033423  | 3609.311  | -1.539 | 0.433 | -3.7146 | 2.00E-04 | 0.010397014 |
| NABP1       | ENSG00000173559 | 851.488   | -1.371 | 0.296  | -4.6614 | 0        | 0.000656564 | 1130.479  | -1.753 | 0.342 | -5.1673 | 0        | 5.76E-05    |
| DENND4A     | ENSG00000174485 | 564.234   | -1.018 | 0.327  | -3.1337 | 0.0017   | 0.056987469 | 738.706   | -1.527 | 0.316 | -4.8509 | 0        | 0.000208258 |
| ANKRD36C    | ENSG00000174501 | 724.717   | -0.931 | 0.317  | -2.9559 | 0.0031   | 0.084238029 | 889.925   | -1.324 | 0.31  | -4.2763 | 0        | 0.001733541 |
| C4orf26     | ENSG00000174792 | 194.368   | -1.712 | 0.383  | -4.7701 | 0        | 0.000417853 | 176.72    | -1.684 | 0.438 | -4.0667 | 0        | 0.00363691  |
| FUT1        | ENSG00000174951 | 63.553    | -1.549 | 0.393  | -4.5724 | 0        | 0.000918304 | 50.982    | -1.613 | 0.45  | -3.9677 | 1.00E-04 | 0.00493415  |
| ZDHHC14     | ENSG00000175048 | 477.227   | 0.962  | 0.28   | 3.4273  | 6.00E-04 | 0.02981255  | 424.383   | 1.185  | 0.384 | 3.0635  | 0.0022   | 0.054648759 |
| FOSL1       | ENSG00000175592 | 74.827    | -1.056 | 0.373  | -4.2598 | 0        | 0.00276216  | 92.579    | -1.124 | 0.432 | -4.0666 | 0        | 0.00363691  |
| TCP11L1     | ENSG00000176148 | 197.992   | -1.467 | 0.39   | -4.1086 | 0        | 0.004376605 | 216.553   | -1.98  | 0.421 | -4.9028 | 0        | 0.000171059 |
| ZSCAN2      | ENSG00000176371 | 155.65    | -1.048 | 0.371  | -2.8789 | 0.004    | 0.096917086 | 183.975   | -1.226 | 0.427 | -2.9404 | 0.0033   | 0.070234387 |
| CADM1       | ENSG00000182985 | 765       | -1.785 | 0.352  | -5.1939 | 0        | 8.45E-05    | 845.608   | -2.019 | 0.385 | -5.3439 | 0        | 2.62E-05    |
| UTY         | ENSG00000183878 | 181.893   | 1.671  | 0.392  | 4.1558  | 0        | 0.003927494 | 169.071   | 2.255  | 0.452 | 4.9129  | 0        | 0.000169316 |
| SOCS3       | ENSG00000184557 | 4222.974  | -1.063 | 0.252  | -4.222  | 0        | 0.00318246  | 4725.244  | -1.267 | 0.267 | -4.7458 | 0        | 0.000330823 |
| PDE4B       | ENSG00000184588 | 12047.532 | -1.109 | 0.221  | -5.0245 | 0        | 0.000179397 | 10709.111 | -0.898 | 0.273 | -3.2958 | 0.001    | 0.032337694 |
| RBM33       | ENSG00000184863 | 2035.766  | -1.183 | 0.288  | -4.1244 | 0        | 0.00421698  | 1812.33   | -1.053 | 0.3   | -3.5125 | 4.00E-04 | 0.018842339 |
| TNFAIP2     | ENSG00000185215 | 1149.667  | -1.171 | 0.392  | -3.4432 | 6.00E-04 | 0.028507853 | 665.542   | -1.258 | 0.435 | -2.9942 | 0.0028   | 0.062493006 |
| LSAMP       | ENSG00000185565 | 65.5      | -1.747 | 0.392  | -5.4407 | 0        | 2.83E-05    | 38.756    | -0.921 | 0.423 | -3.0969 | 0.002    | 0.051117116 |
| UBE2H       | ENSG00000186591 | 2621.808  | -1.002 | 0.265  | -3.7894 | 2.00E-04 | 0.011428329 | 2743.278  | -1.073 | 0.304 | -3.5348 | 4.00E-04 | 0.017711104 |
| TMEM216     | ENSG00000187049 | 366.437   | 0.996  | 0.271  | 3.6645  | 2.00E-04 | 0.016410227 | 324.148   | 1.145  | 0.41  | 2.768   | 0.0056   | 0.098704588 |
| CD55        | ENSG00000196352 | 3844.471  | -1.163 | 0.3    | -3.8906 | 1.00E-04 | 0.008671762 | 3484.713  | -1.045 | 0.331 | -3.1666 | 0.0015   | 0.043552939 |
| PTPN1       | ENSG00000196396 | 1210.362  | -1.579 | 0.326  | -4.9047 | 0        | 0.000302357 | 1276.189  | -1.778 | 0.334 | -5.3619 | 0        | 2.51E-05    |
| TLE1        | ENSG00000196781 | 112.775   | -1.528 | 0.392  | -4.8053 | 0        | 0.000366084 | 119.145   | -1.669 | 0.452 | -4.4955 | 0        | 0.000814184 |
| STRN3       | ENSG00000196792 | 188.988   | -1.22  | 0.347  | -3.5625 | 4.00E-04 | 0.021414858 | 187.856   | -1.299 | 0.373 | -3.5087 | 5.00E-04 | 0.018874833 |
| PPTC7       | ENSG00000196850 | 328.358   | -1.476 | 0.287  | -5.159  | 0        | 9.45E-05    | 287.184   | -1.119 | 0.398 | -2.8449 | 0.0044   | 0.084999993 |
| PIM3        | ENSG00000198355 | 2230.764  | -1.36  | 0.295  | -4.6319 | 0        | 0.000734408 | 2153.566  | -1.368 | 0.31  | -4.4297 | 0        | 0.001027924 |
| BAZ1A       | ENSG00000198604 | 294.298   | -1.34  | 0.326  | -4.1398 | 0        | 0.004013959 | 360.401   | -1.622 | 0.369 | -4.4355 | 0        | 0.001010807 |
| ZNF616      | ENSG00000204611 | 112.551   | 1.228  | 0.393  | 3.0422  | 0.0023   | 0.0701466   | 119.097   | 1.304  | 0.436 | 2.9344  | 0.0033   | 0.070787903 |
| SLC35B4     | ENSG00000205060 | 122.299   | -1.404 | 0.39   | -4.6927 | 0        | 0.000579578 | 122.882   | -1.391 | 0.449 | -4.0563 | 0        | 0.003748575 |
| TRIQK       | ENSG00000205133 | 94.285    | -1.204 | 0.393  | -3.3982 | 7.00E-04 | 0.0309574   | 112.609   | -1.606 | 0.447 | -3.8599 | 1.00E-04 | 0.006652967 |



|            |                 |          |        |       |         |          |             |          |        |       |         |          |             |
|------------|-----------------|----------|--------|-------|---------|----------|-------------|----------|--------|-------|---------|----------|-------------|
| CCNL2      | ENSG00000221978 | 2053.843 | -0.818 | 0.281 | -2.9196 | 0.0035   | 0.089287781 | 2354.989 | -1.063 | 0.297 | -3.5847 | 3.00E-04 | 0.015261837 |
| C4B        | ENSG00000224389 | 5004.977 | -1.181 | 0.392 | -3.4815 | 5.00E-04 | 0.026087251 | 4386.795 | -1.405 | 0.449 | -3.3994 | 7.00E-04 | 0.025204726 |
| PECAM1     | ENSG00000261371 | 5160.352 | -0.849 | 0.174 | -4.8794 | 0        | 0.000324111 | 4974.213 | -0.781 | 0.205 | -3.8026 | 1.00E-04 | 0.007880226 |
| RP11-599B1 | ENSG00000263620 | 88.16    | -1.385 | 0.387 | -4.9307 | 0        | 0.000281858 | 67.859   | -1.353 | 0.447 | -4.0268 | 1.00E-04 | 0.004161743 |
| NOTCH2NL   | ENSG00000264343 | 479.194  | -1.572 | 0.337 | -4.7353 | 0        | 0.000485977 | 404.783  | -1.237 | 0.417 | -3.0255 | 0.0025   | 0.059150559 |
| ACACA      | ENSG00000275176 | 95.444   | -1.839 | 0.392 | -5.29   | 0        | 5.67E-05    | 105.674  | -2.014 | 0.449 | -5.0456 | 0        | 9.85E-05    |

### Genes that are differentially expressed between TG2 VS NonTg2 PCs of CeD patients. Neagtive fold-change indicates increased ex

| Gene    | ENSEMBL_ID      | baseMean    | log2FoldChange | lfcSE  | stat         | pvalue      | padj        |
|---------|-----------------|-------------|----------------|--------|--------------|-------------|-------------|
| CLU     | ENSG00000120885 | 373.8095575 | -1.317         | 0.2443 | -5.714068889 | 1.10E-08    | 7.37E-06    |
| TPSAB1  | ENSG00000172236 | 159.3965827 | -1.276         | 0.2545 | -5.028488553 | 4.94E-07    | 0.000195785 |
| CXCL10  | ENSG00000169245 | 1684.92317  | -1.16          | 0.2178 | -5.49805053  | 3.84E-08    | 2.05E-05    |
| CXCR3   | ENSG00000186810 | 398.3635931 | -1.121         | 0.1739 | -6.447688139 | 1.14E-10    | 1.35E-07    |
| MDM2    | ENSG00000135679 | 3173.902431 | -1.036         | 0.1442 | -7.192650652 | 6.35E-13    | 2.26E-09    |
| PBLD    | ENSG00000108187 | 94.20783976 | -1.03          | 0.2486 | -4.122534742 | 3.75E-05    | 0.004299637 |
| TNFSF9  | ENSG00000125657 | 373.2477952 | -1.025         | 0.2203 | -4.706786602 | 2.52E-06    | 0.000625794 |
| YBX3    | ENSG00000060138 | 414.136524  | -0.958         | 0.1761 | -5.424787064 | 5.80E-08    | 2.95E-05    |
| ATP8B1  | ENSG00000081923 | 67.16215428 | -0.946         | 0.2516 | -4.290380494 | 1.78E-05    | 0.002445232 |
| UNC13C  | ENSG00000137766 | 163.9253723 | -0.908         | 0.2446 | -3.549626448 | 0.000385778 | 0.020939724 |
| MEIS1   | ENSG00000143995 | 69.80245035 | -0.89          | 0.2523 | -3.557414405 | 0.000374523 | 0.020689312 |
| CLEC2B  | ENSG00000110852 | 1349.595534 | -0.879         | 0.1802 | -4.910906337 | 9.07E-07    | 0.000334272 |
| VIL1    | ENSG00000127831 | 276.4574777 | -0.853         | 0.2494 | -3.137378729 | 0.001704658 | 0.056857366 |
| MALL    | ENSG00000144063 | 331.7429905 | -0.852         | 0.2532 | -2.943281571 | 0.003247529 | 0.086382656 |
| EZH2    | ENSG00000106462 | 152.8969229 | -0.847         | 0.247  | -3.556528524 | 0.000375788 | 0.020689312 |
| EHMT1   | ENSG00000181090 | 3961.569394 | -0.846         | 0.1344 | -6.368685679 | 1.91E-10    | 2.04E-07    |
| PAPD7   | ENSG00000112941 | 682.7928754 | -0.838         | 0.1721 | -4.923440288 | 8.50E-07    | 0.000324746 |
| ANKRD10 | ENSG00000088448 | 1428.216851 | -0.825         | 0.1487 | -5.588057793 | 2.30E-08    | 1.44E-05    |
| NPEPL1  | ENSG00000215440 | 872.2078585 | -0.813         | 0.1904 | -4.304590912 | 1.67E-05    | 0.002323222 |
| CLEC2D  | ENSG00000069493 | 328.440627  | -0.809         | 0.2362 | -3.598991622 | 0.000319453 | 0.018564761 |
| FLVCR1  | ENSG00000162769 | 110.3268736 | -0.794         | 0.2437 | -3.696408517 | 0.000218671 | 0.014893306 |
| TRIM25  | ENSG00000121060 | 263.073961  | -0.778         | 0.2537 | -3.634095925 | 0.000278957 | 0.017342372 |
| EXD3    | ENSG00000187609 | 122.1524973 | -0.777         | 0.2501 | -3.340160415 | 0.0008373   | 0.035619775 |
| LPIN2   | ENSG00000101577 | 121.6890489 | -0.775         | 0.2449 | -3.030139564 | 0.002444408 | 0.072027691 |
| CCDC14  | ENSG00000175455 | 505.514583  | -0.767         | 0.2453 | -3.746223736 | 0.000179516 | 0.013147739 |
| EMP2    | ENSG00000213853 | 110.626313  | -0.76          | 0.2545 | -3.455810386 | 0.000548641 | 0.027542815 |
| CCDC169 | ENSG00000242715 | 78.70379185 | -0.759         | 0.2416 | -3.882909547 | 0.000103214 | 0.009121215 |
| PRSS51  | ENSG00000253649 | 71.00998785 | -0.75          | 0.2455 | -3.693899662 | 0.000220841 | 0.014945902 |
| NPIP5   | ENSG00000243716 | 2147.663128 | -0.739         | 0.1609 | -4.734285672 | 2.20E-06    | 0.000587655 |
| CCDC50  | ENSG00000152492 | 1690.14147  | -0.731         | 0.1545 | -4.73995265  | 2.14E-06    | 0.000586108 |

|           |                 |             |        |        |              |             |             |
|-----------|-----------------|-------------|--------|--------|--------------|-------------|-------------|
| ZEB2      | ENSG00000169554 | 78.77884481 | -0.73  | 0.2542 | -2.983950528 | 0.002845528 | 0.078420692 |
| SLC7A11   | ENSG00000151012 | 200.544782  | -0.729 | 0.2538 | -3.61477636  | 0.000300607 | 0.017874011 |
| N4BP2     | ENSG00000078177 | 631.3511318 | -0.729 | 0.2054 | -3.624785982 | 0.000289201 | 0.017570594 |
| IFRD1     | ENSG00000006652 | 1729.58468  | -0.721 | 0.1414 | -5.133226607 | 2.85E-07    | 0.000126898 |
| RGPD2     | ENSG00000185304 | 809.8688319 | -0.716 | 0.2484 | -3.6145402   | 0.000300881 | 0.017874011 |
| KIAA0907  | ENSG00000132680 | 196.5628346 | -0.71  | 0.2314 | -3.216096708 | 0.00129947  | 0.048415458 |
| ETFDH     | ENSG00000171503 | 711.2921753 | -0.709 | 0.213  | -3.447957121 | 0.000564844 | 0.027683234 |
| OGT       | ENSG00000147162 | 4327.013431 | -0.708 | 0.1617 | -4.506909135 | 6.58E-06    | 0.001192157 |
| FCHSD1    | ENSG00000197948 | 170.5514739 | -0.703 | 0.2448 | -3.037425324 | 0.002386085 | 0.071661197 |
| PLCB2     | ENSG00000137841 | 206.315041  | -0.703 | 0.2297 | -3.222055241 | 0.001272746 | 0.047585568 |
| CWC25     | ENSG00000273559 | 597.4433707 | -0.692 | 0.2128 | -3.352810736 | 0.000799954 | 0.03449156  |
| DDX42     | ENSG00000198231 | 744.6320645 | -0.69  | 0.2257 | -3.032996018 | 0.002421388 | 0.071921948 |
| GBP2      | ENSG00000162645 | 398.8802647 | -0.687 | 0.2104 | -3.36143083  | 0.000775398 | 0.033890604 |
| HIST1H2AG | ENSG00000196787 | 153.3601475 | -0.687 | 0.2275 | -3.111650728 | 0.001860445 | 0.060837111 |
| ACADVL    | ENSG00000072778 | 15780.04704 | -0.686 | 0.0997 | -6.896056492 | 5.35E-12    | 8.17E-09    |
| TIAM2     | ENSG00000146426 | 446.3270461 | -0.685 | 0.212  | -3.223097493 | 0.001268124 | 0.047579117 |
| CES4A     | ENSG00000172824 | 130.5694718 | -0.683 | 0.2501 | -3.495414075 | 0.000473327 | 0.024810214 |
| COX20     | ENSG00000203667 | 356.8561484 | -0.679 | 0.1981 | -3.396411941 | 0.000682755 | 0.031468541 |
| FAM118A   | ENSG00000100376 | 621.592242  | -0.678 | 0.2257 | -3.29838016  | 0.000972444 | 0.039793183 |
| HSPA14    | ENSG00000187522 | 387.1347924 | -0.677 | 0.2176 | -3.092570491 | 0.001984311 | 0.063800117 |
| IARS      | ENSG00000196305 | 2484.894622 | -0.677 | 0.1822 | -3.768139657 | 0.000164469 | 0.012472792 |
| HIST1H2BC | ENSG00000180596 | 360.6042932 | -0.675 | 0.206  | -3.297639295 | 0.000975013 | 0.039793183 |
| KLHL26    | ENSG00000167487 | 72.71465516 | -0.674 | 0.2497 | -3.569500303 | 0.000357663 | 0.020226305 |
| KMO       | ENSG00000117009 | 275.40897   | -0.67  | 0.2125 | -3.15744551  | 0.00159158  | 0.055471186 |
| EPG5      | ENSG00000152223 | 280.5615469 | -0.667 | 0.2532 | -3.172895251 | 0.00150927  | 0.053560953 |
| FBXW2     | ENSG00000119402 | 450.1180173 | -0.66  | 0.2024 | -3.419906137 | 0.000626427 | 0.029770617 |
| PCF11     | ENSG00000165494 | 1146.50643  | -0.655 | 0.1399 | -4.708621998 | 2.49E-06    | 0.000625794 |
| TUBGCP6   | ENSG00000128159 | 1542.843605 | -0.651 | 0.1422 | -4.615035571 | 3.93E-06    | 0.000827223 |
| MT-ATP8   | ENSG00000228253 | 6114.166236 | -0.648 | 0.1647 | -3.973459494 | 7.08E-05    | 0.006949097 |
| NFKBID    | ENSG00000167604 | 862.3016584 | -0.646 | 0.2539 | -2.998378359 | 0.002714205 | 0.075976419 |
| PTPRC     | ENSG00000081237 | 1265.242653 | -0.642 | 0.1785 | -3.554131264 | 0.00037923  | 0.020689312 |
| PHLDA3    | ENSG00000174307 | 95.00085031 | -0.64  | 0.2265 | -2.9033681   | 0.003691724 | 0.093470378 |

|          |                 |             |        |        |              |             |             |
|----------|-----------------|-------------|--------|--------|--------------|-------------|-------------|
| WDR24    | ENSG00000127580 | 382.9216085 | -0.638 | 0.1841 | -3.453498673 | 0.000553365 | 0.027556447 |
| CEP83    | ENSG00000173588 | 251.2117459 | -0.637 | 0.24   | -2.927660954 | 0.003415222 | 0.089070666 |
| SMCHD1   | ENSG00000101596 | 1533.096264 | -0.633 | 0.1944 | -3.3106781   | 0.000930702 | 0.038276912 |
| GBP5     | ENSG00000154451 | 482.8401384 | -0.63  | 0.1663 | -3.82778951  | 0.000129299 | 0.010717806 |
| CCDC189  | ENSG00000196118 | 353.4691789 | -0.628 | 0.1595 | -3.928719277 | 8.54E-05    | 0.007872211 |
| GOLGB1   | ENSG00000173230 | 4664.025696 | -0.626 | 0.1426 | -4.414820007 | 1.01E-05    | 0.001613431 |
| TEX14    | ENSG00000121101 | 356.624974  | -0.625 | 0.2244 | -2.975444603 | 0.002925642 | 0.079756681 |
| STK17B   | ENSG00000081320 | 3252.704692 | -0.624 | 0.0857 | -7.284157636 | 3.24E-13    | 1.73E-09    |
| ABCA7    | ENSG00000064687 | 598.2427746 | -0.621 | 0.1893 | -3.256937312 | 0.001126213 | 0.043791258 |
| HLA-DQA1 | ENSG00000196735 | 714.5119866 | -0.616 | 0.2181 | -2.969478791 | 0.002983054 | 0.080958875 |
| LAT2     | ENSG00000086730 | 453.4859852 | -0.61  | 0.1904 | -3.245930201 | 0.001170675 | 0.04508596  |
| GPR89B   | ENSG00000188092 | 460.2505766 | -0.61  | 0.2122 | -2.943751378 | 0.003242604 | 0.086382656 |
| CNTRL    | ENSG00000119397 | 467.6045907 | -0.605 | 0.2102 | -2.927953694 | 0.003412009 | 0.089070666 |
| IL15     | ENSG00000164136 | 500.9620153 | -0.605 | 0.1743 | -3.449518418 | 0.000561587 | 0.027683234 |
| METTL17  | ENSG00000165792 | 657.327904  | -0.603 | 0.1869 | -3.201330717 | 0.001367944 | 0.050093932 |
| MPV17L   | ENSG00000156968 | 149.4279178 | -0.602 | 0.2535 | -2.880992599 | 0.003964249 | 0.097523581 |
| IP6K2    | ENSG00000068745 | 614.1451634 | -0.602 | 0.2042 | -2.984148507 | 0.002843687 | 0.078420692 |
| MAP3K13  | ENSG00000073803 | 1172.527335 | -0.6   | 0.1696 | -3.515189763 | 0.00043944  | 0.023377763 |
| FN1      | ENSG00000115414 | 182.3915796 | -0.599 | 0.2331 | -3.339449939 | 0.000839445 | 0.035619775 |
| SYNE2    | ENSG00000054654 | 1400.976774 | -0.595 | 0.2024 | -3.133980764 | 0.001724522 | 0.057090742 |
| SPTLC2   | ENSG00000100596 | 377.9966632 | -0.594 | 0.2131 | -2.888913883 | 0.003865749 | 0.096676342 |
| SLC28A3  | ENSG00000197506 | 139.4911902 | -0.593 | 0.2326 | -3.6878244   | 0.00022618  | 0.015074959 |
| SGSM3    | ENSG00000100359 | 2723.99723  | -0.587 | 0.1412 | -4.174507984 | 2.99E-05    | 0.003670412 |
| HECTD1   | ENSG00000092148 | 943.368037  | -0.584 | 0.1807 | -3.33116083  | 0.000864846 | 0.036408663 |
| SEC16A   | ENSG00000148396 | 1257.675845 | -0.584 | 0.1824 | -3.269460055 | 0.00107753  | 0.042051179 |
| MT-CO2   | ENSG00000198712 | 76021.19357 | -0.583 | 0.1593 | -3.683784084 | 0.000229797 | 0.015074959 |
| LUC7L    | ENSG00000007392 | 691.1620511 | -0.582 | 0.1876 | -3.211250343 | 0.001321587 | 0.049068524 |
| STARD4   | ENSG00000164211 | 543.0023622 | -0.576 | 0.1592 | -3.62642459  | 0.000287373 | 0.017570594 |
| CCDC88C  | ENSG00000015133 | 1800.404583 | -0.564 | 0.1473 | -3.837368696 | 0.00012436  | 0.010548537 |
| PRC1     | ENSG00000198901 | 43.39090436 | -0.563 | 0.2233 | -3.068454806 | 0.002151689 | 0.066883743 |
| RAB30    | ENSG00000137502 | 9289.372246 | -0.555 | 0.085  | -6.523877718 | 6.85E-11    | 9.16E-08    |
| CCT6A    | ENSG00000146731 | 665.1014083 | -0.551 | 0.1829 | -3.018620386 | 0.002539285 | 0.073020166 |

|          |                 |             |        |        |              |             |             |
|----------|-----------------|-------------|--------|--------|--------------|-------------|-------------|
| NPIPA1   | ENSG00000183426 | 551.6611054 | -0.549 | 0.1963 | -2.875646231 | 0.004032013 | 0.098434517 |
| FAM49A   | ENSG00000197872 | 2229.444675 | -0.548 | 0.1641 | -3.327300473 | 0.000876918 | 0.036772079 |
| NUP160   | ENSG00000030066 | 473.8442338 | -0.547 | 0.1888 | -2.942054057 | 0.00326043  | 0.086510617 |
| OAT      | ENSG00000065154 | 1349.475007 | -0.539 | 0.1822 | -2.873405635 | 0.004060724 | 0.098909609 |
| GALNT3   | ENSG00000115339 | 621.870519  | -0.53  | 0.1697 | -3.141487037 | 0.001680922 | 0.05652234  |
| CCL5     | ENSG00000271503 | 533.1362431 | -0.528 | 0.1792 | -2.933171574 | 0.003355184 | 0.088411589 |
| GADD45A  | ENSG00000116717 | 6571.771746 | -0.526 | 0.118  | -4.46626856  | 7.96E-06    | 0.00132987  |
| CXXC1    | ENSG00000154832 | 1335.643793 | -0.52  | 0.1584 | -3.280955272 | 0.001034561 | 0.040972467 |
| GOLGA7   | ENSG00000147533 | 670.4740371 | -0.513 | 0.1611 | -3.170285623 | 0.001522892 | 0.053743498 |
| MT-ND5   | ENSG00000198786 | 67656.28776 | -0.513 | 0.1273 | -4.029844348 | 5.58E-05    | 0.005738625 |
| MT-ATP6  | ENSG00000198899 | 48191.31334 | -0.507 | 0.1464 | -3.486770276 | 0.000488891 | 0.025133234 |
| FNBP4    | ENSG00000109920 | 1101.633134 | -0.505 | 0.1708 | -2.961719665 | 0.003059262 | 0.082607795 |
| ZRANB2   | ENSG00000132485 | 1422.749415 | -0.502 | 0.1414 | -3.568235207 | 0.000359394 | 0.020226305 |
| NPIPB4   | ENSG00000185864 | 436.2315897 | -0.5   | 0.172  | -2.932894748 | 0.003358177 | 0.088411589 |
| ZNF791   | ENSG00000173875 | 2255.846341 | -0.493 | 0.127  | -3.888998004 | 0.000100659 | 0.009044925 |
| DYNLT1   | ENSG00000146425 | 778.5426442 | -0.49  | 0.1682 | -2.885870804 | 0.003903324 | 0.096698881 |
| FNBP1    | ENSG00000187239 | 1961.111068 | -0.49  | 0.1708 | -2.917271279 | 0.003531085 | 0.090982876 |
| BTAFL1   | ENSG00000095564 | 1083.463127 | -0.484 | 0.1749 | -2.885910919 | 0.003902826 | 0.096698881 |
| CD69     | ENSG00000110848 | 29109.72728 | -0.483 | 0.1471 | -3.36103573  | 0.000776508 | 0.033890604 |
| ARGLU1   | ENSG00000134884 | 1204.103896 | -0.482 | 0.14   | -3.453156829 | 0.000554067 | 0.027556447 |
| MT-ND4   | ENSG00000198886 | 62817.48917 | -0.477 | 0.1385 | -3.463629353 | 0.00053294  | 0.026880804 |
| CDK5RAP3 | ENSG00000108465 | 3106.78182  | -0.477 | 0.13   | -3.684410611 | 0.000229232 | 0.015074959 |
| PNISR    | ENSG00000132424 | 1654.689311 | -0.474 | 0.1601 | -2.98885688  | 0.002800233 | 0.077944989 |
| CPSF1    | ENSG00000071894 | 1075.613358 | -0.47  | 0.1547 | -3.062585181 | 0.00219434  | 0.067815257 |
| MGEA5    | ENSG00000198408 | 1811.368787 | -0.469 | 0.1249 | -3.800190346 | 0.000144585 | 0.011529843 |
| SUPT7L   | ENSG00000119760 | 517.5987937 | -0.468 | 0.1546 | -3.01119829  | 0.002602189 | 0.073611648 |
| HLA-DPA1 | ENSG00000168384 | 839.3762912 | -0.459 | 0.1483 | -3.079622653 | 0.00207263  | 0.06530345  |
| ODF3B    | ENSG00000177989 | 732.8627417 | -0.448 | 0.1362 | -3.284859141 | 0.001020334 | 0.040637357 |
| TROVE2   | ENSG00000116747 | 1307.383399 | -0.446 | 0.1291 | -3.465105684 | 0.000530023 | 0.026860367 |
| MT-ND6   | ENSG00000198695 | 20877.97199 | -0.432 | 0.1343 | -3.223208782 | 0.001267631 | 0.047579117 |
| NOP58    | ENSG00000055044 | 2655.70977  | -0.43  | 0.1044 | -4.122004798 | 3.76E-05    | 0.004299637 |
| ORMDL1   | ENSG00000128699 | 2371.916224 | -0.429 | 0.1174 | -3.663719114 | 0.000248579 | 0.016012405 |

|             |                 |             |        |        |              |             |             |
|-------------|-----------------|-------------|--------|--------|--------------|-------------|-------------|
| EPS15       | ENSG0000085832  | 1065.017535 | -0.425 | 0.133  | -3.210125481 | 0.00132677  | 0.049090505 |
| NCOR1       | ENSG00000141027 | 1699.457251 | -0.421 | 0.1379 | -3.043668698 | 0.002337124 | 0.070994846 |
| DDX39A      | ENSG00000123136 | 1149.720885 | -0.42  | 0.1375 | -3.048349521 | 0.002301021 | 0.070099202 |
| NFKBIZ      | ENSG00000144802 | 2017.847623 | -0.41  | 0.1316 | -3.13922604  | 0.001693947 | 0.056781749 |
| Sep-01      | ENSG00000180096 | 1609.154171 | -0.406 | 0.1289 | -3.149147419 | 0.001637476 | 0.056120281 |
| HMG3        | ENSG00000118418 | 1472.664784 | -0.399 | 0.1296 | -3.070127784 | 0.002139672 | 0.06670412  |
| DOCK2       | ENSG00000134516 | 1713.287814 | -0.392 | 0.1247 | -3.146572168 | 0.001651965 | 0.056256243 |
| CBWD5       | ENSG00000147996 | 1167.366947 | -0.388 | 0.1126 | -3.446983863 | 0.000566882 | 0.027683234 |
| RGCC        | ENSG00000102760 | 18864.581   | -0.387 | 0.0846 | -4.567146093 | 4.94E-06    | 0.000979022 |
| CHKB        | ENSG00000100288 | 1042.695584 | -0.384 | 0.1276 | -3.01607392  | 0.002560708 | 0.073252448 |
| PSME2       | ENSG00000100911 | 3899.986961 | -0.381 | 0.1291 | -2.94488397  | 0.003230758 | 0.086382656 |
| INSIG1      | ENSG00000186480 | 5734.323653 | -0.378 | 0.1178 | -3.152432948 | 0.00161916  | 0.055755531 |
| SRSF6       | ENSG00000124193 | 2283.688186 | -0.367 | 0.1171 | -3.144330824 | 0.001664671 | 0.056508985 |
| OSBPL3      | ENSG00000070882 | 3666.601785 | -0.357 | 0.1056 | -3.37939902  | 0.000726445 | 0.033054788 |
| FGL2        | ENSG00000127951 | 2710.601436 | -0.352 | 0.093  | -3.800137052 | 0.000144616 | 0.011529843 |
| ANXA1       | ENSG00000135046 | 71.65497675 | -0.346 | 0.188  | -4.614473115 | 3.94E-06    | 0.000827223 |
| TMEM259     | ENSG00000182087 | 2432.345737 | -0.335 | 0.0993 | -3.370636721 | 0.000749947 | 0.033413256 |
| CLK1        | ENSG00000013441 | 4683.609491 | -0.332 | 0.1157 | -2.88002317  | 0.003976459 | 0.097523581 |
| RBM39       | ENSG00000131051 | 6146.92217  | -0.297 | 0.0823 | -3.617134558 | 0.000297882 | 0.017874011 |
| CCNC        | ENSG00000112237 | 2183.096605 | -0.284 | 0.0938 | -3.027226349 | 0.002468091 | 0.072503555 |
| SON         | ENSG00000159140 | 3759.185552 | -0.259 | 0.0843 | -3.073081226 | 0.002118608 | 0.066434829 |
| CCNG1       | ENSG00000113328 | 2754.275994 | -0.257 | 0.089  | -2.885601868 | 0.00390666  | 0.096698881 |
| GNL3        | ENSG00000163938 | 3305.038382 | -0.202 | 0.0694 | -2.91283838  | 0.003581599 | 0.092062597 |
| CFB         | ENSG00000204359 | 124.7825812 | -0.069 | 0.097  | -4.040798452 | 5.33E-05    | 0.005584422 |
| RP11-812E19 | ENSG00000259680 | 1306.024735 | -0.056 | 0.1727 | 4.804182819  | 1.55E-06    | 0.000503494 |
| PTMA        | ENSG00000187514 | 15725.37749 | 0.194  | 0.0628 | 3.085673794  | 0.002030915 | 0.064440872 |
| SSR4        | ENSG00000180879 | 56464.68684 | 0.226  | 0.0699 | 3.23777881   | 0.001204642 | 0.045746324 |
| MIF         | ENSG00000240972 | 4586.239323 | 0.23   | 0.077  | 2.988184737  | 0.002806399 | 0.077944989 |
| GPR15       | ENSG00000154165 | 389.9932838 | 0.233  | 0.1908 | 3.057868276  | 0.002229175 | 0.068299635 |
| TMEM258     | ENSG00000134825 | 4350.64639  | 0.247  | 0.0817 | 3.024178491  | 0.002493093 | 0.072837824 |
| UBE2J1      | ENSG00000198833 | 21121.66111 | 0.257  | 0.0852 | 3.019345976  | 0.002533211 | 0.073020166 |
| GLA         | ENSG00000102393 | 5591.790585 | 0.264  | 0.0731 | 3.610948292  | 0.000305079 | 0.018023287 |

|         |                 |             |       |        |             |             |             |
|---------|-----------------|-------------|-------|--------|-------------|-------------|-------------|
| ORMDL3  | ENSG00000172057 | 2118.05405  | 0.266 | 0.0908 | 2.930968955 | 0.003379065 | 0.088559675 |
| FKBP2   | ENSG00000173486 | 8134.084556 | 0.273 | 0.0844 | 3.23735317  | 0.00120644  | 0.045746324 |
| CD63    | ENSG00000135404 | 8065.961299 | 0.274 | 0.0945 | 2.910835894 | 0.003604633 | 0.092432468 |
| HLA-C   | ENSG00000204525 | 44198.70495 | 0.275 | 0.0627 | 4.402656363 | 1.07E-05    | 0.001681529 |
| SELT    | ENSG00000198843 | 4786.754052 | 0.278 | 0.0807 | 3.443442061 | 0.00057436  | 0.027916489 |
| SLC1A5  | ENSG00000105281 | 2366.50482  | 0.288 | 0.0948 | 3.033698535 | 0.002415757 | 0.071921948 |
| CLPTM1L | ENSG00000049656 | 8999.701009 | 0.289 | 0.0855 | 3.380984434 | 0.000722266 | 0.033005103 |
| HSPA8   | ENSG00000109971 | 22249.84458 | 0.294 | 0.0874 | 3.372000996 | 0.000746242 | 0.033387295 |
| TMBIM6  | ENSG00000139644 | 18351.90298 | 0.296 | 0.0657 | 4.507244944 | 6.57E-06    | 0.001192157 |
| SIL1    | ENSG00000120725 | 2876.213834 | 0.298 | 0.0767 | 3.883091372 | 0.000103137 | 0.009121215 |
| RPS14   | ENSG00000164587 | 13676.89267 | 0.304 | 0.0954 | 3.189329613 | 0.001426032 | 0.051865843 |
| SLC25A6 | ENSG00000169100 | 12335.14194 | 0.306 | 0.0705 | 4.333192216 | 1.47E-05    | 0.002152701 |
| FOS     | ENSG00000170345 | 53104.10993 | 0.309 | 0.0829 | 3.735656565 | 0.000187226 | 0.013346721 |
| DDOST   | ENSG00000244038 | 10727.23265 | 0.312 | 0.085  | 3.672133934 | 0.000240534 | 0.015683081 |
| HLA-B   | ENSG00000206450 | 50262.28541 | 0.315 | 0.0922 | 3.415044711 | 0.000637715 | 0.030092783 |
| PRDX4   | ENSG00000123131 | 9363.187599 | 0.315 | 0.109  | 2.902036214 | 0.003707457 | 0.093499612 |
| RPN1    | ENSG00000163902 | 12853.84879 | 0.317 | 0.1028 | 3.090322298 | 0.001999394 | 0.063902108 |
| RPL38   | ENSG00000172809 | 2297.171264 | 0.318 | 0.1029 | 3.093156117 | 0.001980399 | 0.063800117 |
| RPL18A  | ENSG00000105640 | 11826.36935 | 0.323 | 0.068  | 4.75528052  | 1.98E-06    | 0.000557643 |
| EIF1    | ENSG00000173812 | 26585.99171 | 0.323 | 0.0898 | 3.599972699 | 0.000318251 | 0.018564761 |
| RNASEK  | ENSG00000219200 | 2163.973238 | 0.326 | 0.1047 | 3.119692006 | 0.001810402 | 0.05956502  |
| GPX4    | ENSG00000167468 | 1846.468057 | 0.328 | 0.1034 | 3.164239311 | 0.001554889 | 0.054692193 |
| GNG7    | ENSG00000176533 | 2862.237558 | 0.328 | 0.11   | 2.980091362 | 0.002881624 | 0.079211332 |
| CNPY2   | ENSG00000257727 | 2208.593421 | 0.331 | 0.0973 | 3.39985437  | 0.000674218 | 0.031345252 |
| CUTA    | ENSG00000112514 | 2816.476738 | 0.332 | 0.1041 | 3.190151468 | 0.001421982 | 0.051865843 |
| RPL14   | ENSG00000188846 | 5622.29315  | 0.334 | 0.0992 | 3.365961143 | 0.000762775 | 0.033781872 |
| RPS25   | ENSG00000118181 | 6857.009042 | 0.338 | 0.1128 | 2.995677035 | 0.002738363 | 0.076452519 |
| RPL41   | ENSG00000229117 | 25950.09054 | 0.338 | 0.0925 | 3.654257223 | 0.000257928 | 0.01623885  |
| IL2RG   | ENSG00000147168 | 14263.17555 | 0.339 | 0.0758 | 4.472765404 | 7.72E-06    | 0.001313778 |
| RPS5    | ENSG00000083845 | 5924.335521 | 0.34  | 0.1153 | 2.951913185 | 0.003158117 | 0.084848608 |
| HEXB    | ENSG00000049860 | 3207.466902 | 0.341 | 0.0933 | 3.657236695 | 0.000254949 | 0.01623885  |
| RPLP0   | ENSG00000089157 | 19363.51079 | 0.344 | 0.0964 | 3.556317631 | 0.000376089 | 0.020689312 |

|        |                 |             |       |        |             |             |             |
|--------|-----------------|-------------|-------|--------|-------------|-------------|-------------|
| ACTB   | ENSG00000075624 | 26463.69035 | 0.346 | 0.1186 | 2.923881857 | 0.003456959 | 0.089659477 |
| RPL32  | ENSG00000144713 | 3969.591475 | 0.347 | 0.1097 | 3.157635637 | 0.001590542 | 0.055471186 |
| H3F3A  | ENSG00000163041 | 2396.750164 | 0.352 | 0.1068 | 3.288931522 | 0.001005685 | 0.040394202 |
| EIF4B  | ENSG00000063046 | 4559.66059  | 0.352 | 0.1073 | 3.284316751 | 0.0010223   | 0.040637357 |
| MYDGF  | ENSG00000074842 | 5190.856417 | 0.353 | 0.0826 | 4.271235254 | 1.94E-05    | 0.002631198 |
| RPL36A | ENSG00000241343 | 3311.404131 | 0.353 | 0.1088 | 3.241814337 | 0.001187714 | 0.045520512 |
| RPL36  | ENSG00000130255 | 4255.559217 | 0.356 | 0.1033 | 3.435860088 | 0.000590676 | 0.028323308 |
| FAU    | ENSG00000149806 | 5268.667397 | 0.358 | 0.1132 | 3.153469239 | 0.001613422 | 0.055755531 |
| MZB1   | ENSG00000170476 | 60592.19133 | 0.36  | 0.0754 | 4.783506309 | 1.72E-06    | 0.000511711 |
| TXNDC5 | ENSG00000239264 | 147967.439  | 0.365 | 0.0971 | 3.757768376 | 0.000171435 | 0.012730905 |
| ITM2B  | ENSG00000136156 | 5709.068614 | 0.367 | 0.1187 | 3.103712616 | 0.001911089 | 0.062302655 |
| REEP5  | ENSG00000129625 | 4627.573579 | 0.368 | 0.1152 | 3.186132523 | 0.001441885 | 0.052097909 |
| SNTB1  | ENSG00000172164 | 44.50242039 | 0.37  | 0.2057 | 3.798959055 | 0.000145305 | 0.011529843 |
| NME2   | ENSG00000243678 | 2848.169948 | 0.37  | 0.129  | 2.878905391 | 0.00399058  | 0.097645938 |
| CNKSR2 | ENSG00000149970 | 52.25341956 | 0.37  | 0.2192 | 3.079078257 | 0.002076421 | 0.06530345  |
| RPL23A | ENSG00000198242 | 15212.32038 | 0.371 | 0.0982 | 3.774165483 | 0.000160544 | 0.012262134 |
| HINT1  | ENSG00000169567 | 2966.840071 | 0.372 | 0.099  | 3.757755947 | 0.000171444 | 0.012730905 |
| RPL29  | ENSG00000162244 | 5358.441808 | 0.374 | 0.0819 | 4.569173593 | 4.90E-06    | 0.000979022 |
| EEF1A1 | ENSG00000156508 | 98930.28607 | 0.375 | 0.0906 | 4.12923442  | 3.64E-05    | 0.004276885 |
| AMPD1  | ENSG00000116748 | 3596.894167 | 0.375 | 0.1295 | 2.923342499 | 0.003462954 | 0.089659477 |
| FERMT2 | ENSG00000073712 | 90.06712678 | 0.378 | 0.2414 | 3.05786942  | 0.002229167 | 0.068299635 |
| RPL15  | ENSG00000174748 | 21123.33037 | 0.379 | 0.0962 | 3.939819614 | 8.15E-05    | 0.007785163 |
| UBA52  | ENSG00000221983 | 2082.052507 | 0.384 | 0.1034 | 3.710136128 | 0.000207148 | 0.014239355 |
| RPL24  | ENSG00000114391 | 3583.18579  | 0.385 | 0.1127 | 3.414566945 | 0.000638835 | 0.030092783 |
| ERGIC1 | ENSG00000113719 | 1466.657483 | 0.388 | 0.1274 | 3.049594693 | 0.002291504 | 0.070008715 |
| DNAJC4 | ENSG00000110011 | 750.3377073 | 0.389 | 0.1292 | 3.011620618 | 0.002598571 | 0.073611648 |
| RPS8   | ENSG00000142937 | 6672.457897 | 0.389 | 0.1309 | 2.97747105  | 0.002906371 | 0.079482926 |
| PCMTD1 | ENSG00000168300 | 2415.563898 | 0.393 | 0.1311 | 3.019750867 | 0.002529827 | 0.073020166 |
| HSPB1  | ENSG00000106211 | 4119.975453 | 0.394 | 0.1326 | 2.963148932 | 0.003045092 | 0.082433338 |
| CTSS   | ENSG00000163131 | 3915.301515 | 0.397 | 0.1289 | 3.070206232 | 0.00213911  | 0.06670412  |
| RPL35A | ENSG00000182899 | 4466.884521 | 0.399 | 0.1256 | 3.172234131 | 0.00151271  | 0.053560953 |
| RPS11  | ENSG00000142534 | 8872.61176  | 0.4   | 0.1069 | 3.739557142 | 0.000184345 | 0.013308111 |



|           |                 |             |       |        |             |             |             |
|-----------|-----------------|-------------|-------|--------|-------------|-------------|-------------|
| HSPA1B    | ENSG00000204388 | 19078.49121 | 0.4   | 0.1234 | 3.245569602 | 0.001172159 | 0.04508596  |
| GUSB      | ENSG00000169919 | 3163.796659 | 0.402 | 0.1054 | 3.815897308 | 0.000135689 | 0.011160937 |
| EVI2B     | ENSG00000185862 | 2826.817697 | 0.403 | 0.1342 | 3.012149576 | 0.002594047 | 0.073611648 |
| ZNF717    | ENSG00000227124 | 41.39067002 | 0.404 | 0.2252 | 2.978914836 | 0.002892712 | 0.07931222  |
| RPS20     | ENSG00000008988 | 3898.133102 | 0.405 | 0.127  | 3.184129396 | 0.001451901 | 0.052097909 |
| EIF3F     | ENSG00000175390 | 3055.19264  | 0.407 | 0.1182 | 3.432883071 | 0.0005972   | 0.028508282 |
| RPL13A    | ENSG00000142541 | 14276.09284 | 0.407 | 0.0908 | 4.477354875 | 7.56E-06    | 0.001313778 |
| RPL19     | ENSG00000108298 | 9306.745235 | 0.408 | 0.1006 | 4.051404747 | 5.09E-05    | 0.005390019 |
| LMO4      | ENSG00000143013 | 1596.938445 | 0.408 | 0.1348 | 3.024708965 | 0.002488725 | 0.072837824 |
| SLC39A8   | ENSG00000138821 | 2285.853275 | 0.411 | 0.1347 | 3.067071865 | 0.002161669 | 0.066999201 |
| RNPEPL1   | ENSG00000142327 | 1452.135247 | 0.413 | 0.143  | 2.889713078 | 0.003855936 | 0.096676342 |
| LITAF     | ENSG00000189067 | 2449.317655 | 0.415 | 0.1047 | 3.960581523 | 7.48E-05    | 0.007202599 |
| TIGD6     | ENSG00000164296 | 113.4113408 | 0.419 | 0.2313 | 2.918786772 | 0.003513965 | 0.090760452 |
| POU2AF1   | ENSG00000110777 | 4275.72705  | 0.421 | 0.1253 | 3.374515193 | 0.000739458 | 0.033362988 |
| RPL28     | ENSG00000108107 | 1847.727348 | 0.422 | 0.1299 | 3.249821866 | 0.001154773 | 0.044739093 |
| RPL39     | ENSG00000198918 | 3167.413123 | 0.422 | 0.1025 | 4.115467134 | 3.86E-05    | 0.004303889 |
| RPL8      | ENSG00000161016 | 10817.72516 | 0.423 | 0.0865 | 4.882109756 | 1.05E-06    | 0.000374101 |
| RPL17     | ENSG00000265681 | 7168.955502 | 0.423 | 0.1469 | 2.887867982 | 0.003878626 | 0.096676342 |
| FCRL2     | ENSG00000132704 | 2273.77164  | 0.428 | 0.1465 | 2.906810218 | 0.003651347 | 0.093085423 |
| CDC42     | ENSG00000070831 | 1163.537241 | 0.428 | 0.1266 | 3.386296667 | 0.000708428 | 0.032511655 |
| PLD4      | ENSG00000166428 | 92.29918946 | 0.428 | 0.2114 | 3.040077058 | 0.002365176 | 0.071443022 |
| RPL12     | ENSG00000197958 | 5929.01205  | 0.429 | 0.1108 | 3.872782577 | 0.0001076   | 0.009354185 |
| BAMBI     | ENSG00000095739 | 176.119426  | 0.429 | 0.2512 | 3.018498464 | 0.002540307 | 0.073020166 |
| SUMF2     | ENSG00000129103 | 1366.073314 | 0.433 | 0.1279 | 3.377153765 | 0.000732401 | 0.03318459  |
| TNFRSF10A | ENSG00000104689 | 120.110254  | 0.435 | 0.2387 | 3.08905254  | 0.002007959 | 0.063902108 |
| EIF5A     | ENSG00000132507 | 2584.147089 | 0.436 | 0.1055 | 4.148281336 | 3.35E-05    | 0.003979942 |
| ANKRD37   | ENSG00000186352 | 4380.420714 | 0.437 | 0.1324 | 3.291111568 | 0.000997923 | 0.040394202 |
| SMPDL3B   | ENSG00000130768 | 869.0671626 | 0.438 | 0.1462 | 2.999604764 | 0.002703301 | 0.075976419 |
| RPL6      | ENSG00000089009 | 3441.514929 | 0.439 | 0.1377 | 3.184749499 | 0.001448794 | 0.052097909 |
| MAN2A1    | ENSG00000112893 | 1163.161501 | 0.442 | 0.1545 | 2.902873776 | 0.003697556 | 0.093470378 |
| RPS27A    | ENSG00000143947 | 7187.231868 | 0.443 | 0.1211 | 3.656328869 | 0.000255853 | 0.01623885  |
| CD48      | ENSG00000117091 | 1107.977177 | 0.445 | 0.1269 | 3.523725958 | 0.000425524 | 0.022750646 |

|          |                 |             |       |        |             |             |             |
|----------|-----------------|-------------|-------|--------|-------------|-------------|-------------|
| RPS3A    | ENSG00000145425 | 12583.62863 | 0.445 | 0.12   | 3.71247047  | 0.000205246 | 0.014239355 |
| MRPS24   | ENSG00000062582 | 1658.075546 | 0.445 | 0.1364 | 3.274758829 | 0.001057522 | 0.041573839 |
| CD59     | ENSG00000085063 | 2783.01143  | 0.446 | 0.1192 | 3.759494336 | 0.000170257 | 0.012730905 |
| KRTCAP2  | ENSG00000163463 | 4576.447461 | 0.446 | 0.0933 | 4.790094824 | 1.67E-06    | 0.000511711 |
| KDELR1   | ENSG00000105438 | 2789.04841  | 0.45  | 0.1174 | 3.835548817 | 0.000125284 | 0.010548537 |
| ARID5B   | ENSG00000150347 | 3438.413128 | 0.455 | 0.104  | 4.394307434 | 1.11E-05    | 0.001712349 |
| CYBA     | ENSG00000051523 | 19659.05253 | 0.457 | 0.0744 | 6.142168684 | 8.14E-10    | 7.91E-07    |
| BTG2     | ENSG00000159388 | 26721.67956 | 0.458 | 0.1113 | 4.118116017 | 3.82E-05    | 0.004299637 |
| RPS17    | ENSG00000182774 | 2574.07613  | 0.462 | 0.1407 | 3.293022047 | 0.000991167 | 0.040298665 |
| EIF3L    | ENSG00000100129 | 3087.556533 | 0.464 | 0.1104 | 4.203188915 | 2.63E-05    | 0.003272316 |
| MKX      | ENSG00000150051 | 34.37225943 | 0.465 | 0.2178 | 3.156201603 | 0.001598383 | 0.055491928 |
| TCN2     | ENSG00000185339 | 1060.951301 | 0.466 | 0.1373 | 3.406876656 | 0.000657108 | 0.030817796 |
| GSTP1    | ENSG00000084207 | 8656.762214 | 0.466 | 0.1081 | 4.329166812 | 1.50E-05    | 0.002162797 |
| TIFA     | ENSG00000145365 | 2058.567868 | 0.467 | 0.1472 | 3.206657987 | 0.001342865 | 0.049344537 |
| LIMD2    | ENSG00000136490 | 450.6244718 | 0.467 | 0.1419 | 3.279412204 | 0.001040236 | 0.041045168 |
| RPL23    | ENSG00000125691 | 4892.036594 | 0.471 | 0.1246 | 3.780845262 | 0.000156297 | 0.012023609 |
| RPS28    | ENSG00000233927 | 4797.27637  | 0.473 | 0.1185 | 3.996108094 | 6.44E-05    | 0.006495729 |
| CECR1    | ENSG00000093072 | 5391.232138 | 0.476 | 0.1419 | 3.350137847 | 0.000807714 | 0.034547523 |
| BRMS1    | ENSG00000174744 | 712.0043749 | 0.48  | 0.154  | 3.097691044 | 0.001950346 | 0.063197134 |
| EEF1B2   | ENSG00000114942 | 6931.024841 | 0.481 | 0.1072 | 4.480402649 | 7.45E-06    | 0.001313778 |
| RPL7A    | ENSG00000148303 | 6623.843313 | 0.481 | 0.1376 | 3.493176895 | 0.00047731  | 0.024895659 |
| RPLP1    | ENSG00000137818 | 23935.99294 | 0.481 | 0.1172 | 4.106788631 | 4.01E-05    | 0.004377562 |
| AP3S1    | ENSG00000177879 | 1535.452028 | 0.483 | 0.1237 | 3.906160632 | 9.38E-05    | 0.008532341 |
| SLAMF1   | ENSG00000117090 | 2638.145914 | 0.483 | 0.1372 | 3.554721822 | 0.000378379 | 0.020689312 |
| RPL31    | ENSG00000071082 | 2964.912448 | 0.485 | 0.1398 | 3.46809386  | 0.000524164 | 0.026707793 |
| NCL      | ENSG00000115053 | 4358.167424 | 0.487 | 0.1055 | 4.634195779 | 3.58E-06    | 0.00079825  |
| TNFRSF17 | ENSG00000048462 | 6285.624728 | 0.49  | 0.1029 | 4.783490359 | 1.72E-06    | 0.000511711 |
| RACK1    | ENSG00000204628 | 12259.55466 | 0.492 | 0.0949 | 5.178794096 | 2.23E-07    | 0.000103827 |
| ERP29    | ENSG00000089248 | 3712.374848 | 0.492 | 0.1055 | 4.664580055 | 3.09E-06    | 0.00071903  |
| FOSB     | ENSG00000125740 | 23012.89625 | 0.494 | 0.1147 | 4.319396599 | 1.56E-05    | 0.002230651 |
| IDH2     | ENSG00000182054 | 2366.685863 | 0.494 | 0.0982 | 5.030549955 | 4.89E-07    | 0.000195785 |
| RPS16    | ENSG00000105193 | 4205.596776 | 0.494 | 0.1168 | 4.224429666 | 2.40E-05    | 0.003123747 |

|            |                 |             |       |        |             |             |             |
|------------|-----------------|-------------|-------|--------|-------------|-------------|-------------|
| RPS27      | ENSG00000177954 | 11025.71661 | 0.494 | 0.102  | 4.841304538 | 1.29E-06    | 0.000431027 |
| HMOX1      | ENSG00000100292 | 51.59881136 | 0.495 | 0.2393 | 3.101083893 | 0.001928137 | 0.062667368 |
| CKAP4      | ENSG00000136026 | 3768.565448 | 0.496 | 0.1168 | 4.24390229  | 2.20E-05    | 0.002936111 |
| RPS23      | ENSG00000186468 | 5493.808899 | 0.496 | 0.119  | 4.165112567 | 3.11E-05    | 0.003781421 |
| PLP2       | ENSG00000102007 | 2473.16475  | 0.496 | 0.1138 | 4.35683787  | 1.32E-05    | 0.001986737 |
| RARRES3    | ENSG00000133321 | 1402.481974 | 0.497 | 0.1424 | 3.488964596 | 0.000484895 | 0.025048242 |
| NPTX2      | ENSG00000106236 | 145.1802138 | 0.497 | 0.2215 | 3.014687855 | 0.002572439 | 0.073352227 |
| ZNF418     | ENSG00000196724 | 56.01690676 | 0.5   | 0.2045 | 3.559020209 | 0.000372241 | 0.020689312 |
| ATF3       | ENSG00000162772 | 5559.525245 | 0.501 | 0.1355 | 3.683814518 | 0.000229769 | 0.015074959 |
| ATP6VOE1   | ENSG00000113732 | 1964.937302 | 0.502 | 0.1066 | 4.72057013  | 2.35E-06    | 0.000613373 |
| RPL30      | ENSG00000156482 | 4720.24147  | 0.504 | 0.1239 | 4.068397842 | 4.73E-05    | 0.005112929 |
| NUP62      | ENSG00000213024 | 548.4977013 | 0.505 | 0.1721 | 2.959460896 | 0.003081778 | 0.08300618  |
| GHDC       | ENSG00000167925 | 403.8990276 | 0.505 | 0.1765 | 2.906393595 | 0.003656212 | 0.093085423 |
| CD180      | ENSG00000134061 | 835.0858527 | 0.506 | 0.1614 | 3.137004064 | 0.001706838 | 0.056857366 |
| LTBP3      | ENSG00000168056 | 802.1669463 | 0.506 | 0.1619 | 3.180264251 | 0.001471408 | 0.052621293 |
| NLRP7      | ENSG00000167634 | 808.2730925 | 0.509 | 0.1702 | 2.998870122 | 0.002709828 | 0.075976419 |
| TPM4       | ENSG00000167460 | 6670.473914 | 0.512 | 0.0731 | 6.996534895 | 2.62E-12    | 5.61E-09    |
| TUBA1B     | ENSG00000123416 | 2066.822457 | 0.513 | 0.1287 | 3.993589777 | 6.51E-05    | 0.006503784 |
| ERGIC3     | ENSG00000125991 | 5773.128787 | 0.513 | 0.1015 | 5.059732306 | 4.20E-07    | 0.000179576 |
| RPL5       | ENSG00000122406 | 10697.67521 | 0.513 | 0.1416 | 3.629957938 | 0.000283467 | 0.017520908 |
| RPL37A     | ENSG00000197756 | 5265.424318 | 0.519 | 0.1397 | 3.709416187 | 0.000207738 | 0.014239355 |
| CTHRC1     | ENSG00000164932 | 680.6411394 | 0.525 | 0.1737 | 3.079796095 | 0.002071424 | 0.06530345  |
| SLC30A6    | ENSG00000152683 | 498.8079518 | 0.528 | 0.1587 | 3.325570561 | 0.000882378 | 0.036838248 |
| METTL7A    | ENSG00000185432 | 2001.808505 | 0.529 | 0.1511 | 3.505792687 | 0.00045525  | 0.024098934 |
| RPL11      | ENSG00000142676 | 3728.237465 | 0.531 | 0.1255 | 4.229662852 | 2.34E-05    | 0.003089641 |
| RPL37      | ENSG00000145592 | 3041.865324 | 0.532 | 0.1179 | 4.507826349 | 6.55E-06    | 0.001192157 |
| RHOB       | ENSG00000143878 | 912.0002742 | 0.534 | 0.1788 | 3.036615512 | 0.002392504 | 0.071661197 |
| RPLP2      | ENSG00000177600 | 3700.900197 | 0.534 | 0.1157 | 4.614236957 | 3.95E-06    | 0.000827223 |
| BMP6       | ENSG00000153162 | 2107.632105 | 0.535 | 0.1298 | 4.11810939  | 3.82E-05    | 0.004299637 |
| TNFAIP3    | ENSG00000118503 | 24795.79255 | 0.538 | 0.1435 | 3.784615532 | 0.000153946 | 0.012015684 |
| TMED9      | ENSG00000184840 | 5267.757862 | 0.543 | 0.1403 | 3.859676313 | 0.000113537 | 0.009712436 |
| AC233755.1 | ENSG00000275063 | 27482.57037 | 0.543 | 0.2491 | 3.136077443 | 0.00171224  | 0.056860188 |

|            |                 |             |       |        |             |             |             |
|------------|-----------------|-------------|-------|--------|-------------|-------------|-------------|
| GMPR       | ENSG00000137198 | 69.93359457 | 0.543 | 0.239  | 3.019472883 | 0.00253215  | 0.073020166 |
| TMEM19     | ENSG00000139291 | 1168.982891 | 0.546 | 0.1532 | 3.584736841 | 0.000337418 | 0.019424851 |
| AC136616.3 | ENSG00000278782 | 106.7290395 | 0.548 | 0.2061 | 3.372404718 | 0.000745149 | 0.033387295 |
| CD9        | ENSG00000010278 | 1223.432403 | 0.549 | 0.1753 | 3.238447117 | 0.001201823 | 0.045746324 |
| LEPROT     | ENSG00000213625 | 724.866925  | 0.554 | 0.1783 | 3.147081    | 0.001649093 | 0.056256243 |
| DARS       | ENSG00000115866 | 1036.889718 | 0.554 | 0.1969 | 2.870345484 | 0.004100235 | 0.099645038 |
| AIG1       | ENSG00000146416 | 973.8589934 | 0.556 | 0.1426 | 3.90517667  | 9.42E-05    | 0.008532341 |
| RPS10      | ENSG00000124614 | 3427.676438 | 0.558 | 0.1324 | 4.217137834 | 2.47E-05    | 0.00318758  |
| SLC47A1    | ENSG00000142494 | 795.4200866 | 0.558 | 0.1634 | 3.44694133  | 0.000566972 | 0.027683234 |
| TRABD2A    | ENSG00000186854 | 195.6635683 | 0.558 | 0.2497 | 3.157258977 | 0.001592598 | 0.055471186 |
| UBE2E1     | ENSG00000170142 | 419.7501056 | 0.558 | 0.1884 | 3.0083727   | 0.002626508 | 0.074103566 |
| TSSC1      | ENSG00000032389 | 300.5124154 | 0.558 | 0.1931 | 2.909650191 | 0.003618335 | 0.092561854 |
| AQP3       | ENSG00000165272 | 2819.10013  | 0.558 | 0.1426 | 3.928721585 | 8.54E-05    | 0.007872211 |
| ZMYND11    | ENSG00000015171 | 468.5936082 | 0.559 | 0.1924 | 2.923395885 | 0.00346236  | 0.089659477 |
| CCR2       | ENSG00000121807 | 1367.423633 | 0.562 | 0.1422 | 3.934847293 | 8.32E-05    | 0.007808667 |
| VIM        | ENSG00000026025 | 19402.78907 | 0.563 | 0.1362 | 4.156900395 | 3.23E-05    | 0.003875847 |
| RPL18      | ENSG00000063177 | 5394.529613 | 0.569 | 0.1308 | 4.353838155 | 1.34E-05    | 0.001986737 |
| TFE3       | ENSG00000068323 | 240.2563794 | 0.571 | 0.2007 | 2.883486273 | 0.003932998 | 0.097125973 |
| FBL        | ENSG00000105202 | 433.6747243 | 0.572 | 0.1884 | 3.031119867 | 0.002436485 | 0.072027691 |
| FRZB       | ENSG00000162998 | 166.7591527 | 0.572 | 0.2511 | 3.042823227 | 0.0023437   | 0.070994846 |
| TMEM52     | ENSG00000178821 | 226.1009759 | 0.573 | 0.1993 | 2.90438489  | 0.003679755 | 0.093462278 |
| FBXW7      | ENSG00000109670 | 3660.441229 | 0.579 | 0.1447 | 4.056658267 | 4.98E-05    | 0.005322958 |
| RPS12      | ENSG00000112306 | 3707.375542 | 0.584 | 0.1464 | 3.997102823 | 6.41E-05    | 0.006495729 |
| JSRP1      | ENSG00000167476 | 767.2701685 | 0.587 | 0.1677 | 3.578254016 | 0.000345897 | 0.019779031 |
| WHRN       | ENSG00000095397 | 688.2598745 | 0.589 | 0.157  | 3.74260006  | 0.000182126 | 0.013248116 |
| SLC39A7    | ENSG00000112473 | 2460.274046 | 0.59  | 0.1577 | 3.746567425 | 0.000179271 | 0.013147739 |
| ST6GAL1    | ENSG00000073849 | 3902.786345 | 0.591 | 0.1576 | 3.828031734 | 0.000129172 | 0.010717806 |
| ERO1B      | ENSG00000086619 | 1212.022066 | 0.594 | 0.169  | 3.539464611 | 0.00040094  | 0.021543951 |
| LRRN1      | ENSG00000175928 | 118.4590702 | 0.594 | 0.2394 | 3.625912119 | 0.000287943 | 0.017570594 |
| CFL2       | ENSG00000165410 | 1651.926551 | 0.595 | 0.1888 | 3.184529215 | 0.001449897 | 0.052097909 |
| RPSA       | ENSG00000168028 | 3119.160524 | 0.596 | 0.1537 | 3.874497734 | 0.000106845 | 0.009354185 |
| GADD45B    | ENSG00000099860 | 4089.648939 | 0.599 | 0.0995 | 6.023013588 | 1.71E-09    | 1.41E-06    |

|            |                 |             |       |        |             |             |             |
|------------|-----------------|-------------|-------|--------|-------------|-------------|-------------|
| BCL2       | ENSG00000171791 | 1132.775501 | 0.599 | 0.1868 | 3.272111918 | 0.001067473 | 0.041811318 |
| LCMT2      | ENSG00000168806 | 118.6726998 | 0.603 | 0.2494 | 3.151989899 | 0.001621619 | 0.055755531 |
| FAM50B     | ENSG00000145945 | 63.53488628 | 0.604 | 0.2469 | 3.364185947 | 0.000767698 | 0.033781872 |
| RNASEH2C   | ENSG00000172922 | 539.3595737 | 0.606 | 0.1749 | 3.467914179 | 0.000524515 | 0.026707793 |
| TMEM156    | ENSG00000121895 | 575.5906441 | 0.609 | 0.1721 | 3.491891308 | 0.000479613 | 0.024895659 |
| AC141272.1 | ENSG00000277836 | 3112.837065 | 0.613 | 0.2474 | 3.038562152 | 0.002377101 | 0.07160095  |
| ANKRD53    | ENSG00000144031 | 65.71528919 | 0.613 | 0.2483 | 2.97485208  | 0.002931299 | 0.079756681 |
| TMEM64     | ENSG00000180694 | 328.2502602 | 0.615 | 0.2175 | 2.943506333 | 0.003245172 | 0.086382656 |
| LRRRC24    | ENSG00000254402 | 219.125056  | 0.616 | 0.2233 | 2.880311135 | 0.003972829 | 0.097523581 |
| ESAM       | ENSG00000149564 | 94.84906203 | 0.619 | 0.2511 | 3.440931663 | 0.000579715 | 0.027922936 |
| RPS3       | ENSG00000149273 | 10690.73948 | 0.622 | 0.1066 | 5.831113827 | 5.51E-09    | 3.92E-06    |
| APH1A      | ENSG00000117362 | 309.5935177 | 0.624 | 0.2076 | 2.986321123 | 0.00282356  | 0.078218456 |
| MGMT       | ENSG00000170430 | 341.3451814 | 0.625 | 0.2242 | 3.035144638 | 0.002404204 | 0.071810472 |
| UEVLD      | ENSG00000151116 | 104.0792535 | 0.625 | 0.2543 | 2.888387234 | 0.003872228 | 0.096676342 |
| ALOX5      | ENSG00000012779 | 1582.37721  | 0.626 | 0.1709 | 3.712239433 | 0.000205434 | 0.014239355 |
| CYB5R2     | ENSG00000166394 | 107.9490197 | 0.626 | 0.2407 | 3.499404493 | 0.000466299 | 0.024562222 |
| TNFRSF4    | ENSG00000186827 | 766.0409006 | 0.629 | 0.177  | 3.619388978 | 0.000295299 | 0.017839758 |
| SCYL3      | ENSG00000000457 | 471.8777956 | 0.631 | 0.2323 | 3.015910493 | 0.002562089 | 0.073252448 |
| HSBP1L1    | ENSG00000226742 | 131.9287667 | 0.633 | 0.2541 | 3.018508616 | 0.002540222 | 0.073020166 |
| CLDN3      | ENSG00000165215 | 408.2610464 | 0.637 | 0.2545 | 3.738067902 | 0.00018544  | 0.013308111 |
| ZDHHC18    | ENSG00000204160 | 868.1311175 | 0.642 | 0.1694 | 3.797797442 | 0.000145988 | 0.011529843 |
| PPP1R2P9   | ENSG00000102055 | 114.9385349 | 0.642 | 0.2275 | 4.672465183 | 2.98E-06    | 0.00071903  |
| HIST1H4C   | ENSG00000197061 | 1151.474777 | 0.643 | 0.1941 | 3.358613621 | 0.000783345 | 0.034050037 |
| RAB5C      | ENSG00000108774 | 321.6707111 | 0.644 | 0.2191 | 2.932250958 | 0.003365147 | 0.088411589 |
| B3GNT9     | ENSG00000237172 | 290.6367976 | 0.649 | 0.2165 | 3.030047121 | 0.002445156 | 0.072027691 |
| FANCE      | ENSG00000112039 | 99.92641996 | 0.65  | 0.2455 | 3.654016843 | 0.000258169 | 0.01623885  |
| COCH       | ENSG00000100473 | 76.43427564 | 0.652 | 0.2382 | 3.289454994 | 0.001003816 | 0.040394202 |
| AMMECR1L   | ENSG00000144233 | 202.1680428 | 0.663 | 0.2431 | 2.935626553 | 0.003328748 | 0.088104709 |
| GRINA      | ENSG00000178719 | 142.4813161 | 0.663 | 0.2167 | 3.089363775 | 0.002005857 | 0.063902108 |
| CLN6       | ENSG00000128973 | 298.4386899 | 0.665 | 0.2003 | 3.351618699 | 0.000803406 | 0.034501282 |
| PAX5       | ENSG00000196092 | 59.95734327 | 0.669 | 0.2457 | 3.353642602 | 0.000797553 | 0.03449156  |
| GADD45G    | ENSG00000130222 | 233.3907522 | 0.672 | 0.2077 | 3.323538725 | 0.000888831 | 0.036838248 |

|          |                 |             |       |        |             |             |             |
|----------|-----------------|-------------|-------|--------|-------------|-------------|-------------|
| LCP1     | ENSG00000136167 | 390.1971427 | 0.678 | 0.2258 | 3.314985224 | 0.00091648  | 0.037837519 |
| HIPK2    | ENSG00000064393 | 1236.958439 | 0.68  | 0.1473 | 4.66010875  | 3.16E-06    | 0.00071903  |
| MYL2     | ENSG00000111245 | 196.144926  | 0.68  | 0.2076 | 3.364954432 | 0.000765563 | 0.033781872 |
| WDR81    | ENSG00000167716 | 216.5163915 | 0.681 | 0.2273 | 3.092190223 | 0.001986855 | 0.063800117 |
| YY1      | ENSG00000100811 | 727.2375917 | 0.682 | 0.1733 | 3.96417202  | 7.37E-05    | 0.007159559 |
| PERP     | ENSG00000112378 | 676.8230265 | 0.686 | 0.1542 | 4.511000631 | 6.45E-06    | 0.001192157 |
| CTSW     | ENSG00000172543 | 657.8971534 | 0.686 | 0.1986 | 3.584374737 | 0.000337887 | 0.019424851 |
| TNFAIP2  | ENSG00000185215 | 1299.375643 | 0.691 | 0.2132 | 3.226022539 | 0.001255235 | 0.047428356 |
| MIXL1    | ENSG00000185155 | 314.6672649 | 0.698 | 0.2176 | 3.323835456 | 0.000887886 | 0.036838248 |
| JUN      | ENSG00000177606 | 53443.31187 | 0.702 | 0.1019 | 6.900944065 | 5.17E-12    | 8.17E-09    |
| CAPG     | ENSG00000042493 | 477.1969868 | 0.706 | 0.1976 | 3.643244557 | 0.000269223 | 0.016835086 |
| ERLIN2   | ENSG00000147475 | 294.0457862 | 0.709 | 0.2387 | 3.141577886 | 0.001680401 | 0.05652234  |
| IGLL1    | ENSG00000128322 | 171.8433067 | 0.711 | 0.2387 | 2.897647569 | 0.003759728 | 0.094594761 |
| ANKIB1   | ENSG00000001629 | 352.7718595 | 0.718 | 0.2085 | 3.542362654 | 0.00039656  | 0.021416236 |
| TLR6     | ENSG00000174130 | 57.24213475 | 0.719 | 0.2545 | 3.175177622 | 0.001497448 | 0.053374041 |
| FAM208B  | ENSG00000108021 | 446.5184069 | 0.723 | 0.2486 | 3.288109133 | 0.001008627 | 0.040394202 |
| DUSP26   | ENSG00000133878 | 504.9808664 | 0.728 | 0.1865 | 3.935162537 | 8.31E-05    | 0.007808667 |
| CD99     | ENSG00000002586 | 413.2235501 | 0.732 | 0.2015 | 3.684402191 | 0.00022924  | 0.015074959 |
| ZNF530   | ENSG00000183647 | 97.70670392 | 0.737 | 0.2403 | 3.061534842 | 0.002202054 | 0.06785752  |
| DDI2     | ENSG00000197312 | 237.6707551 | 0.74  | 0.2536 | 3.57511537  | 0.000350073 | 0.019911361 |
| PAWR     | ENSG00000177425 | 262.925816  | 0.742 | 0.2375 | 3.114539991 | 0.00184232  | 0.06042922  |
| KLHL5    | ENSG00000109790 | 804.5719516 | 0.759 | 0.2125 | 3.607194945 | 0.000309525 | 0.018185451 |
| MAN1A2   | ENSG00000198162 | 3107.092458 | 0.762 | 0.1726 | 4.472241601 | 7.74E-06    | 0.001313778 |
| KIAA2022 | ENSG00000050030 | 62.97769721 | 0.767 | 0.254  | 3.440962048 | 0.00057965  | 0.027922936 |
| TBXAS1   | ENSG00000059377 | 316.560988  | 0.768 | 0.2545 | 3.127868321 | 0.00176079  | 0.05811152  |
| TMEM110  | ENSG00000213533 | 249.8408135 | 0.771 | 0.2477 | 3.208870958 | 0.001332573 | 0.049135177 |
| OGFOD3   | ENSG00000181396 | 682.5407463 | 0.773 | 0.1766 | 4.312488363 | 1.61E-05    | 0.002271241 |
| MRPS23   | ENSG00000181610 | 316.231624  | 0.784 | 0.2391 | 3.33498872  | 0.000853029 | 0.036053102 |
| ZNF83    | ENSG00000167766 | 141.9921644 | 0.794 | 0.2337 | 3.401181021 | 0.000670954 | 0.031329734 |
| MLLT1    | ENSG00000130382 | 77.83135455 | 0.804 | 0.2525 | 3.396826328 | 0.000681722 | 0.031468541 |
| ANKH     | ENSG00000154122 | 260.0923657 | 0.815 | 0.2539 | 3.859979741 | 0.000113396 | 0.009712436 |
| IQCG     | ENSG00000114473 | 326.6318532 | 0.824 | 0.2538 | 3.782383264 | 0.000155334 | 0.012023609 |

|          |                 |             |       |        |             |             |             |
|----------|-----------------|-------------|-------|--------|-------------|-------------|-------------|
| PGPEP1   | ENSG00000130517 | 403.3638192 | 0.828 | 0.2176 | 3.801911201 | 0.000143584 | 0.011529843 |
| TMEM154  | ENSG00000170006 | 626.1924143 | 0.828 | 0.2149 | 4.212430494 | 2.53E-05    | 0.003216015 |
| KLF2     | ENSG00000127528 | 3143.472268 | 0.829 | 0.1366 | 6.057608923 | 1.38E-09    | 1.23E-06    |
| TSPAN7   | ENSG00000156298 | 706.176446  | 0.829 | 0.1749 | 4.858611906 | 1.18E-06    | 0.000407754 |
| RCN3     | ENSG00000142552 | 460.1333282 | 0.829 | 0.1819 | 4.59132428  | 4.40E-06    | 0.000905702 |
| PLTP     | ENSG00000100979 | 322.3857278 | 0.835 | 0.2471 | 3.666360152 | 0.000246027 | 0.015944064 |
| EAF1     | ENSG00000144597 | 169.2882995 | 0.836 | 0.2545 | 3.733292861 | 0.000188993 | 0.013383432 |
| PALD1    | ENSG00000107719 | 159.0051423 | 0.851 | 0.2515 | 3.142823445 | 0.001673267 | 0.05652234  |
| TREML2   | ENSG00000112195 | 64.9605664  | 0.859 | 0.2385 | 3.730247519 | 0.000191292 | 0.013457123 |
| DEPTOR   | ENSG00000155792 | 331.238325  | 0.882 | 0.2242 | 3.979340264 | 6.91E-05    | 0.00684221  |
| SPN      | ENSG00000197471 | 273.2460463 | 0.887 | 0.2352 | 3.796685783 | 0.000146643 | 0.011529843 |
| VPREB3   | ENSG00000128218 | 59.78096489 | 0.915 | 0.2501 | 4.111935301 | 3.92E-05    | 0.004325222 |
| C10orf10 | ENSG00000165507 | 333.5677162 | 0.925 | 0.2541 | 4.660808215 | 3.15E-06    | 0.00071903  |
| ATF5     | ENSG00000169136 | 179.6951135 | 0.926 | 0.2359 | 4.037864888 | 5.39E-05    | 0.0055998   |
| PLAC8    | ENSG00000145287 | 132.9697508 | 0.933 | 0.2545 | 4.204438862 | 2.62E-05    | 0.003272316 |
| PHACTR1  | ENSG00000112137 | 932.5290877 | 0.936 | 0.2395 | 4.392419499 | 1.12E-05    | 0.001712349 |
| IL5RA    | ENSG00000091181 | 139.3080185 | 0.948 | 0.2487 | 4.444890455 | 8.79E-06    | 0.001424707 |
| KPNA5    | ENSG00000196911 | 332.256605  | 0.984 | 0.2135 | 4.774646439 | 1.80E-06    | 0.000520267 |
| CTGF     | ENSG00000118523 | 538.806505  | 0.989 | 0.1791 | 5.560257384 | 2.69E-08    | 1.60E-05    |
| SULF2    | ENSG00000196562 | 373.5884848 | 1.008 | 0.2531 | 4.530492312 | 5.88E-06    | 0.001144081 |
| PLA2G2D  | ENSG00000117215 | 314.6679145 | 1.052 | 0.2544 | 4.46192356  | 8.12E-06    | 0.00133625  |
| ITPRIP   | ENSG00000148841 | 704.2620191 | 1.068 | 0.2082 | 5.272780259 | 1.34E-07    | 6.53E-05    |
| RASD1    | ENSG00000108551 | 629.2042791 | 1.106 | 0.1907 | 5.883535416 | 4.02E-09    | 3.07E-06    |
| QPCT     | ENSG00000115828 | 3017.231262 | 1.193 | 0.1705 | 7.075417178 | 1.49E-12    | 3.98E-09    |
| CD27     | ENSG00000139193 | 7087.935456 | 1.21  | 0.1018 | 11.90123254 | 1.17E-32    | 1.25E-28    |
| S100A4   | ENSG00000196154 | 148.7969975 | 1.314 | 0.2537 | 5.5029795   | 3.73E-08    | 2.05E-05    |

pression in TG2 PCs.
